# Supplementary material for: A New Genome-to-Genome Comparison Approach for Large-Scale Revisiting of Current Microbial Taxonomy
Source: MDPI journal article supplement (doi:10.3390/microorganisms7060161), 2019-06-03
Supplement: s1 [file s1]

**Table S1.** Reference data set, 7861 microbial genomes, downloaded from the National Center for Biotechnology Information.

| ID | Species name                        | File name                                          |
|----|-------------------------------------|----------------------------------------------------|
| 1  | <i>Saccharomyces cerevisiae</i>     | GCA_000146045.2_R64_genomic.fna                    |
| 2  | <i>Eremothecium gossypii</i>        | GCA_000091025.4_ASM9102v4_genomic.fna              |
| 3  | <i>Kluyveromyces lactis</i>         | GCA_000002515.1_ASM251v1_genomic.fna               |
| 4  | <i>Candida dubliniensis</i>         | GCA_000026945.1_ASM2694v1_genomic.fna              |
| 5  | <i>Botrytis cinerea</i>             | GCA_000832945.1_ASM83294v1_genomic.fna             |
| 6  | <i>Thermothelomyces thermophila</i> | GCA_000226095.1_ASM22609v1_genomic.fna             |
| 7  | <i>Thielavia terrestris</i>         | GCA_000226115.1_ASM22611v1_genomic.fna             |
| 8  | <i>Kluyveromyces marxianus</i>      | GCA_001417885.1_Kmar_1.0_genomic.fna               |
| 9  | <i>Sporisorium scitamineum</i>      | GCA_001010845.1_ASM101084v1_genomic.fna            |
| 10 | <i>Talaromyces pinophilus</i>       | GCA_001571465.2_ASM157146v2_genomic.fna            |
| 11 | <i>Sugiyamaella lignohabitans</i>   | GCA_001640025.2_ASM164002v2_genomic.fna            |
| 12 | <i>Ustilago bromivora</i>           | GCA_900080155.1_UBRO_v3_genomic.fna                |
| 13 | <i>Zygosaccharomyces parabailii</i> | GCA_001984395.2_ASM198439v2_genomic.fna            |
| 14 | <i>Saccharomycopsis fibuligera</i>  | GCA_001936155.1_KPH12_genomic.fna                  |
| 15 | <i>Malassezia sympodialis</i>       | GCA_900149135.1_Msy_KS292_June2015_genomic.fna     |
| 16 | <i>Kluyveromyces marxianus</i>      | GCA_001417835.1_KM1777_03_genomic.fna              |
| 17 | <i>Verticillium dahliae</i>         | GCA_000400815.2_VDAG_JR2v.4.0_genomic.fna          |
| 18 | <i>Yarrowia lipolytica</i>          | GCA_000613145.1_YALIO_genomic.fna                  |
| 19 | <i>Kluyveromyces lactis</i>         | GCA_002151565.1_ASM215156v1_genomic.fna            |
| 20 | <i>Eremothecium gossypii</i>        | GCA_000968835.1_ASM96883v1_genomic.fna             |
| 21 | <i>Saccharomyces cerevisiae</i>     | GCA_001051215.1_ASM105121v1_genomic.fna            |
| 22 | <i>Yarrowia lipolytica</i>          | GCA_001761485.1_ASM176148v1_genomic.fna            |
| 23 | <i>Verticillium dahliae</i>         | GCA_000952015.1_ASM95201v1_genomic.fna             |
| 24 | <i>Kluyveromyces marxianus</i>      | GCA_001854445.1_ASM185444v1_genomic.fna            |
| 25 | <i>Malassezia sympodialis</i>       | GCA_900149145.1_Msy_ATCC_42132_Feb2016_genomic.fna |
| 26 | <i>Malassezia sympodialis</i>       | GCA_900149155.1_Msy_KS024_June2015_genomic.fna     |
| 27 | <i>Malassezia sympodialis</i>       | GCA_900149165.1_Msy_KS327_June2015_genomic.fna     |
| 28 | <i>Malassezia sympodialis</i>       | GCA_900149175.1_Msy_KS004_June2015_genomic.fna     |
| 29 | <i>Methanococcus maripaludis</i>    | GCA_000017225.1_ASM1722v1_genomic.fna              |
| 30 | <i>Sulfolobus islandicus</i>        | GCA_000022385.1_ASM2238v1_genomic.fna              |
| 31 | <i>Methanococcus voltae</i>         | GCA_000006175.2_ASM617v2_genomic.fna               |

|    |                                               |                                        |
|----|-----------------------------------------------|----------------------------------------|
| 32 | <i>Methanobrevibacter smithii</i>             | GCA_000016525.1_ASM1652v1_genomic.fna  |
| 33 | <i>Sulfolobus solfataricus</i>                | GCA_900079115.1_SSOP1_genomic.fna      |
| 34 | <i>Methanocaldococcus jannaschii</i>          | GCA_000091665.1_ASM9166v1_genomic.fna  |
| 35 | <i>Methanosarcina barkeri</i>                 | GCA_000970025.1_ASM97002v1_genomic.fna |
| 36 | <i>Archaeoglobus fulgidus</i>                 | GCA_000008665.1_ASM866v1_genomic.fna   |
| 37 | <i>Thermoplasma acidophilum</i>               | GCA_000195915.1_ASM19591v1_genomic.fna |
| 38 | <i>Pyrobaculum aerophilum</i>                 | GCA_000007225.1_ASM722v1_genomic.fna   |
| 39 | <i>Pyrococcus abyssi</i>                      | GCA_000195935.2_ASM19593v2_genomic.fna |
| 40 | <i>Thermoplasma volcanium</i>                 | GCA_000011185.1_ASM1118v1_genomic.fna  |
| 41 | <i>Pyrococcus horikoshii</i>                  | GCA_000011105.1_ASM1110v1_genomic.fna  |
| 42 | <i>Aeropyrum pernix</i>                       | GCA_000011125.1_ASM1112v1_genomic.fna  |
| 43 | <i>Halobacterium salinarum</i>                | GCA_000006805.1_ASM680v1_genomic.fna   |
| 44 | <i>Ferroplasma acidarmanus</i>                | GCA_000152265.2_ASM15226v2_genomic.fna |
| 45 | <i>Sulfolobus tokodaii</i>                    | GCA_000011205.1_ASM1120v1_genomic.fna  |
| 46 | <i>Methanosarcina mazei</i>                   | GCA_000970205.1_ASM97020v1_genomic.fna |
| 47 | <i>Pyrococcus furiosus</i>                    | GCA_000007305.1_ASM730v1_genomic.fna   |
| 48 | <i>Methanothermobacter thermautotrophicus</i> | GCA_000008645.1_ASM864v1_genomic.fna   |
| 49 | <i>Methanosarcina acetivorans</i>             | GCA_000007345.1_ASM734v1_genomic.fna   |
| 50 | <i>Methanopyrus kandleri</i>                  | GCA_000007185.1_ASM718v1_genomic.fna   |
| 51 | <i>Haloarcula marismortui</i>                 | GCA_000011085.1_ASM1108v1_genomic.fna  |
| 52 | <i>Hyperthermus butylicus</i>                 | GCA_000015145.1_ASM1514v1_genomic.fna  |
| 53 | <i>Nanoarchaeum equitans</i>                  | GCA_000008085.1_ASM808v1_genomic.fna   |
| 54 | <i>Haloferax volcanii</i>                     | GCA_000025685.1_ASM2568v1_genomic.fna  |
| 55 | <i>Methanospirillum hungatei</i>              | GCA_000013445.1_ASM1344v1_genomic.fna  |
| 56 | <i>Thermococcus kodakarensis</i>              | GCA_000009965.1_ASM996v1_genomic.fna   |
| 57 | <i>Halorubrum lacusprofundi</i>               | GCA_000022205.1_ASM2220v1_genomic.fna  |
| 58 | <i>Pyrolobus fumarii</i>                      | GCA_000223395.1_ASM22339v1_genomic.fna |
| 59 | <i>Ignicoccus hospitalis</i>                  | GCA_000017945.1_ASM1794v1_genomic.fna  |
| 60 | <i>Sulfolobus acidocaldarius</i>              | GCA_000012285.1_ASM1228v1_genomic.fna  |
| 61 | <i>Methanosphaera stadtmanae</i>              | GCA_000012545.1_ASM1254v1_genomic.fna  |
| 62 | <i>Pyrobaculum arsenaticum</i>                | GCA_000016385.1_ASM1638v1_genomic.fna  |
| 63 | <i>Pyrobaculum neutrophilum</i>               | GCA_000019805.1_ASM1980v1_genomic.fna  |
| 64 | <i>Natronomonas pharaonis</i>                 | GCA_000026045.1_ASM2604v1_genomic.fna  |
| 65 | <i>Methanosaeta thermophila</i>               | GCA_000014945.1_ASM1494v1_genomic.fna  |

|    |                                       |                                        |
|----|---------------------------------------|----------------------------------------|
| 66 | <i>Thermofilum pendens</i>            | GCA_000015225.1_ASM1522v1_genomic.fna  |
| 67 | <i>Pyrobaculum islandicum</i>         | GCA_000015205.1_ASM1520v1_genomic.fna  |
| 68 | <i>Haloquadratum walsbyi</i>          | GCA_000237865.1_ASM23786v1_genomic.fna |
| 69 | <i>Caldivirga maquilensis</i>         | GCA_000018305.1_ASM1830v1_genomic.fna  |
| 70 | <i>Metallosphaera sedula</i>          | GCA_000016605.1_ASM1660v1_genomic.fna  |
| 71 | <i>Staphylothermus marinus</i>        | GCA_000015945.1_ASM1594v1_genomic.fna  |
| 72 | <i>Methanococcus vanniellii</i>       | GCA_000017165.1_ASM1716v1_genomic.fna  |
| 73 | <i>Methanocorpusculum labreanum</i>   | GCA_000015765.1_ASM1576v1_genomic.fna  |
| 74 | <i>Pyrobaculum calidifontis</i>       | GCA_000015805.1_ASM1580v1_genomic.fna  |
| 75 | <i>Methanoregula boonei</i>           | GCA_000017625.1_ASM1762v1_genomic.fna  |
| 76 | <i>Methanococcus aeolicus</i>         | GCA_000017185.1_ASM1718v1_genomic.fna  |
| 77 | <i>Nitrosopumilus maritimus</i>       | GCA_000018465.1_ASM1846v1_genomic.fna  |
| 78 | <i>Aciduliprofundum boonei</i>        | GCA_000025665.1_ASM2566v1_genomic.fna  |
| 79 | <i>Thermococcus barophilus</i>        | GCA_000151105.2_ASM15110v2_genomic.fna |
| 80 | <i>Methanocella arvoryzae</i>         | GCA_000063445.1_ASM6344v1_genomic.fna  |
| 81 | <i>Thermococcus onnurineus</i>        | GCA_000018365.1_ASM1836v1_genomic.fna  |
| 82 | <i>Methanococcoides burtonii</i>      | GCA_000013725.1_ASM1372v1_genomic.fna  |
| 83 | <i>Picrophilus torridus</i>           | GCA_000008265.1_ASM826v1_genomic.fna   |
| 84 | <i>Methanoculleus marisnigri</i>      | GCA_000015825.1_ASM1582v1_genomic.fna  |
| 85 | <i>Methanosphaerula palustris</i>     | GCA_000021965.1_ASM2196v1_genomic.fna  |
| 86 | <i>Methanohalophilus mahii</i>        | GCA_000025865.1_ASM2586v1_genomic.fna  |
| 87 | <i>Natrialba magadii</i>              | GCA_000025625.1_ASM2562v1_genomic.fna  |
| 88 | <i>Archaeoglobus profundus</i>        | GCA_000025285.1_ASM2528v1_genomic.fna  |
| 89 | <i>Vulcanisaeta distributa</i>        | GCA_000148385.1_ASM14838v1_genomic.fna |
| 90 | <i>Methanocaldococcus infernus</i>    | GCA_000092305.1_ASM9230v1_genomic.fna  |
| 91 | <i>Methanocaldococcus fervens</i>     | GCA_000023985.1_ASM2398v1_genomic.fna  |
| 92 | <i>Methanocaldococcus vulcanius</i>   | GCA_000024625.1_ASM2462v1_genomic.fna  |
| 93 | <i>Ignisphaera aggregans</i>          | GCA_000145985.1_ASM14598v1_genomic.fna |
| 94 | <i>Ferroglobus placidus</i>           | GCA_000025505.1_ASM2550v1_genomic.fna  |
| 95 | <i>Methanothermobacter fervidus</i>   | GCA_000166095.1_ASM16609v1_genomic.fna |
| 96 | <i>Thermococcus gammatolerans</i>     | GCA_000022365.1_ASM2236v1_genomic.fna  |
| 97 | <i>Staphylothermus hellenicus</i>     | GCA_000092465.1_ASM9246v1_genomic.fna  |
| 98 | <i>Methanobrevibacter ruminantium</i> | GCA_000024185.1_ASM2418v1_genomic.fna  |
| 99 | <i>Thermococcus sibiricus</i>         | GCA_000022545.1_ASM2254v1_genomic.fna  |

|     |                                         |                                        |
|-----|-----------------------------------------|----------------------------------------|
| 100 | <i>Haloarcula hispanica</i>             | GCA_000223905.1_ASM22390v1_genomic.fna |
| 101 | <i>Thermosphaera aggregans</i>          | GCA_000092185.1_ASM9218v1_genomic.fna  |
| 102 | <i>Acidilobus saccharovorans</i>        | GCA_000144915.1_ASM14491v1_genomic.fna |
| 103 | <i>Methanosalsum zhilinae</i>           | GCA_000217995.1_ASM21799v1_genomic.fna |
| 104 | <i>Methanolacinia petrolearia</i>       | GCA_000147875.1_ASM14787v1_genomic.fna |
| 105 | <i>Methanohalobium evestigatum</i>      | GCA_000196655.1_ASM19665v1_genomic.fna |
| 106 | <i>Haloterrigena turkmenica</i>         | GCA_000025325.1_ASM2532v1_genomic.fna  |
| 107 | <i>Methanocella paludicola</i>          | GCA_000011005.1_ASM1100v1_genomic.fna  |
| 108 | <i>Methanothermococcus okinawensis</i>  | GCA_000179575.2_ASM17957v2_genomic.fna |
| 109 | <i>Methanothermobacter marburgensis</i> | GCA_000145295.1_ASM14529v1_genomic.fna |
| 110 | <i>Desulfurococcus mucosus</i>          | GCA_000186365.1_ASM18636v1_genomic.fna |
| 111 | <i>Halalkalicoccus jeotgali</i>         | GCA_000196895.1_ASM19689v1_genomic.fna |
| 112 | <i>Archaeoglobus veneficus</i>          | GCA_000194625.1_ASM19462v1_genomic.fna |
| 113 | <i>Methanotorris igneus</i>             | GCA_000214415.1_ASM21441v1_genomic.fna |
| 114 | <i>halophilic archaeon</i>              | GCA_000224475.1_ASM22447v1_genomic.fna |
| 115 | <i>Halopiger xanaduensis</i>            | GCA_000217715.1_ASM21771v1_genomic.fna |
| 116 | <i>Halovivax ruber</i>                  | GCA_000328525.1_ASM32852v1_genomic.fna |
| 117 | <i>Halogeometricum borinquense</i>      | GCA_000172995.2_ASM17299v2_genomic.fna |
| 118 | <i>Halomicrobium mukohataei</i>         | GCA_000023965.1_ASM2396v1_genomic.fna  |
| 119 | <i>Halorhabdus utahensis</i>            | GCA_000023945.1_ASM2394v1_genomic.fna  |
| 120 | <i>Acidianus hospitalis</i>             | GCA_000213215.1_ASM21321v1_genomic.fna |
| 121 | <i>Vulcanisaeta moutnovskia</i>         | GCA_000190315.1_ASM19031v1_genomic.fna |
| 122 | <i>Methanosaeta concilii</i>            | GCA_000204415.1_ASM20441v1_genomic.fna |
| 123 | <i>Thermoproteus uzoniensis</i>         | GCA_000193375.1_ASM19337v1_genomic.fna |
| 124 | <i>Pyrococcus yayanosii</i>             | GCA_000215995.1_ASM21599v1_genomic.fna |
| 125 | <i>Metallosphaera cuprina</i>           | GCA_000204925.1_ASM20492v1_genomic.fna |
| 126 | <i>Halorhabdus tiamatea</i>             | GCA_000470655.1_HATI1_genomic.fna      |
| 127 | <i>Nitrososphaera viennensis</i>        | GCA_000698785.1_ASM69878v1_genomic.fna |
| 128 | <i>Thermococcus nautili</i>             | GCA_000585495.1_ASM58549v1_genomic.fna |
| 129 | <i>Halobiforma lacisalsi</i>            | GCA_000226975.3_ASM22697v3_genomic.fna |
| 130 | <i>Haloferax mediterranei</i>           | GCA_000306765.2_ASM30676v2_genomic.fna |
| 131 | <i>Pyrobaculum oguniense</i>            | GCA_000247545.1_ASM24754v1_genomic.fna |
| 132 | <i>Natronococcus occultus</i>           | GCA_000328685.1_ASM32868v1_genomic.fna |
| 133 | <i>Natronomonas moolapensis</i>         | GCA_000591055.1_ASM59105v1_genomic.fna |

|     |                                        |                                         |
|-----|----------------------------------------|-----------------------------------------|
| 134 | <i>Methanomethylovorans hollandica</i> | GCA_000328665.1_ASM32866v1_genomic.fna  |
| 135 | <i>Natrinema pellirubrum</i>           | GCA_000230735.3_ASM23073v3_genomic.fna  |
| 136 | <i>Natronobacterium gregoryi</i>       | GCA_000230715.3_ASM23071v3_genomic.fna  |
| 137 | <i>Ignicoccus islandicus</i>           | GCA_001481685.1_ASM148168v1_genomic.fna |
| 138 | <i>Methanoregula formicica</i>         | GCA_000327485.1_ASM32748v1_genomic.fna  |
| 139 | <i>Caldisphaera lagunensis</i>         | GCA_000317795.1_ASM31779v1_genomic.fna  |
| 140 | <i>Halostagnicola larsenii</i>         | GCA_000517625.1_ASM51762v1_genomic.fna  |
| 141 | <i>Thermoplasmatales archaeon</i>      | GCA_000350305.1_ASM35030v1_genomic.fna  |
| 142 | <i>Methanocella conradii</i>           | GCA_000251105.1_ASM25110v1_genomic.fna  |
| 143 | <i>Thermoproteus tenax</i>             | GCA_000253055.1_ASM25305v1_genomic.fna  |
| 144 | <i>Methanobacterium psychrophilus</i>  | GCA_000306725.1_ASM30672v1_genomic.fna  |
| 145 | <i>Methanosaeta harundinacea</i>       | GCA_000235565.1_ASM23556v1_genomic.fna  |
| 146 | <i>Thermococcus litoralis</i>          | GCA_000246985.3_ASM24698v3_genomic.fna  |
| 147 | <i>Fervidicoccus fontis</i>            | GCA_000258425.1_ASM25842v1_genomic.fna  |
| 148 | <i>Methanoculleus bourgensis</i>       | GCA_000304355.2_Mb_MS2_genomic.fna      |
| 149 | <i>Methanobacterium formicicum</i>     | GCA_000762265.1_ASM76226v1_genomic.fna  |
| 150 | <i>Haloferax gibbonsii</i>             | GCA_001190965.1_ASM119096v1_genomic.fna |
| 151 | <i>Archaeoglobus sulfaticallidus</i>   | GCA_000385565.1_ASM38556v1_genomic.fna  |
| 152 | <i>Palaeococcus pacificus</i>          | GCA_000725425.1_ASM72542v1_genomic.fna  |
| 153 | <i>Thermogladius calderae</i>          | GCA_000264495.1_ASM26449v1_genomic.fna  |
| 154 | <i>Desulfurococcus amylolyticus</i>    | GCA_000020905.1_ASM2090v1_genomic.fna   |
| 155 | <i>Methanobacterium lacus</i>          | GCA_000191585.1_ASM19158v1_genomic.fna  |
| 156 | <i>Methanobacterium paludis</i>        | GCA_000214725.1_ASM21472v1_genomic.fna  |
| 157 | <i>Thermococcus eurythermalis</i>      | GCA_000769655.1_ASM76965v1_genomic.fna  |
| 158 | <i>Geoglobus acetivorans</i>           | GCA_000789255.1_ASM78925v1_genomic.fna  |
| 159 | <i>Thermophilum carboxyditrophus</i>   | GCA_000813245.1_ASM81324v1_genomic.fna  |
| 160 | <i>Thermococcus guaymasensis</i>       | GCA_000816105.1_ASM81610v1_genomic.fna  |
| 161 | <i>archaeon GW2011_AR10</i>            | GCA_000830275.1_ASM83027v1_genomic.fna  |
| 162 | <i>archaeon GW2011_AR20</i>            | GCA_000830315.1_ASM83031v1_genomic.fna  |
| 163 | <i>Methanosarcina thermophila</i>      | GCA_000969885.1_ASM96988v1_genomic.fna  |
| 164 | <i>Methanosarcina vacuolata</i>        | GCA_000969905.1_ASM96990v1_genomic.fna  |
| 165 | <i>Methanosarcina siciliae</i>         | GCA_000970085.1_ASM97008v1_genomic.fna  |
| 166 | <i>Methanosarcina lacustris</i>        | GCA_000970265.1_ASM97026v1_genomic.fna  |
| 167 | <i>Methanosarcina horonobensis</i>     | GCA_000970285.1_ASM97028v1_genomic.fna  |

|     |                                          |                                                            |
|-----|------------------------------------------|------------------------------------------------------------|
| 168 | <i>Thermococcus paralvinellae</i>        | GCA_000517445.1_ASM51744v1_genomic.fna                     |
| 169 | <i>Thermococcus cleftensis</i>           | GCA_000265525.1_ASM26552v1_genomic.fna                     |
| 170 | <i>Geoglobus ahangari</i>                | GCA_001006045.1_ASM100604v1_genomic.fna                    |
| 171 | <i>Halanaeroarchaeum sulfurireducens</i> | GCA_001011115.1_ASM101111v1_genomic.fna                    |
| 172 | <i>Thermococcus celer</i>                | GCA_002214365.1_ASM221436v1_genomic.fna                    |
| 173 | <i>Thermococcus peptonophilus</i>        | GCA_001592435.1_ASM159243v1_genomic.fna                    |
| 174 | <i>Pyrodictium delaneyi</i>              | GCA_001412615.1_ASM141261v1_genomic.fna                    |
| 175 | <i>Thermococcus thioeducens</i>          | GCA_002214545.1_ASM221454v1_genomic.fna                    |
| 176 | <i>Methanocaldococcus bathoardescens</i> | GCA_000739065.1_ASM73906v1_genomic.fna                     |
| 177 | <i>Pyrobaculum ferrireducens</i>         | GCA_000234805.1_ASM23480v1_genomic.fna                     |
| 178 | <i>Methanobrevibacter millerae</i>       | GCA_001477655.1_ASM147765v1_genomic.fna                    |
| 179 | <i>Halobacterium hubeiense</i>           | GCA_001488575.1_Halobacterium_hubeiense_JI20-1_genomic.fna |
| 180 | methanogenic archaeon                    | GCA_001560915.1_ASM156091v1_genomic.fna                    |
| 181 | <i>Methanobrevibacter olleyae</i>        | GCA_001563245.1_ASM156324v1_genomic.fna                    |
| 182 | <i>Thermococcus chitonophagus</i>        | GCA_002214605.1_ASM221460v1_genomic.fna                    |
| 183 | <i>Thermococcus piezophilus</i>          | GCA_001647085.1_ASM164708v1_genomic.fna                    |
| 184 | <i>Nanohaloarchaea archaeon</i>          | GCA_001761425.1_ASM176142v1_genomic.fna                    |
| 185 | <i>Halopenitus persicus</i>              | GCA_002355635.1_ASM235563v1_genomic.fna                    |
| 186 | <i>Methanohalophilus halophilus</i>      | GCA_001889405.1_ASM188940v1_genomic.fna                    |
| 187 | <i>Methanobacterium congolense</i>       | GCA_900095295.1_MCB_B_genomic.fna                          |
| 188 | <i>Halodesulfurarchaeum formicicum</i>   | GCA_001886955.1_ASM188695v1_genomic.fna                    |
| 189 | <i>Pyrococcus kukulkanii</i>             | GCA_001577775.1_ASM157777v1_genomic.fna                    |
| 190 | <i>Methanothermobacter wolfeii</i>       | GCA_900095815.1_SIV6_genomic.fna                           |
| 191 | <i>Thermophilum adornatus</i>            | GCA_000446015.1_ASM44601v1_genomic.fna                     |
| 192 | <i>Cuniculiplasma divulgatum</i>         | GCA_900090055.1_C.divulgatum_PM4_genomic.fna               |
| 193 | <i>Haloterrigena daqingensis</i>         | GCA_001971705.1_ASM197170v1_genomic.fna                    |
| 194 | <i>Thermophilum uzonense</i>             | GCA_000993805.1_ASM99380v1_genomic.fna                     |
| 195 | <i>Ferroplasma acidiphilum</i>           | GCA_002078355.1_ASM207835v1_genomic.fna                    |
| 196 | <i>Acidianus manzaensis</i>              | GCA_002116695.1_ASM211669v1_genomic.fna                    |
| 197 | <i>Natrialbaeae archaeon</i>             | GCA_002156705.1_ASM215670v1_genomic.fna                    |
| 198 | <i>Thermococcus gorgonarius</i>          | GCA_002214385.1_ASM221438v1_genomic.fna                    |
| 199 | <i>Thermococcus barossii</i>             | GCA_002214465.1_ASM221446v1_genomic.fna                    |
| 200 | <i>Thermococcus pacificus</i>            | GCA_002214485.1_ASM221448v1_genomic.fna                    |
| 201 | <i>Thermococcus siculi</i>               | GCA_002214505.1_ASM221450v1_genomic.fna                    |

|     |                                          |                                                                      |
|-----|------------------------------------------|----------------------------------------------------------------------|
| 202 | <i>Thermococcus radiotolerans</i>        | GCA_002214565.1_ASM221456v1_genomic.fna                              |
| 203 | <i>Thermococcus profundus</i>            | GCA_002214585.1_ASM221458v1_genomic.fna                              |
| 204 | <i>Halorubrum trapanicum</i>             | GCA_002355655.1_ASM235565v1_genomic.fna                              |
| 205 | <i>Cuniculiplasma divulgatum</i>         | GCA_900083515.1_ASM90008351v1_genomic.fna                            |
| 206 | <i>Halodesulfurarchaeum formicicum</i>   | GCA_001767315.1_ASM176731v1_genomic.fna                              |
| 207 | <i>Thermococcus chitonophagus</i>        | GCA_900012635.1_Pyrococcus_chitonophagus_genome_sequence_genomic.fna |
| 208 | <i>Halanaeroarchaeum sulfurireducens</i> | GCA_001305655.1_ASM130565v1_genomic.fna                              |
| 209 | <i>Methanosarcina siciliae</i>           | GCA_000970145.1_ASM97014v1_genomic.fna                               |
| 210 | <i>Methanosarcina thermophila</i>        | GCA_000969925.1_ASM96992v1_genomic.fna                               |
| 211 | <i>Methanococcoides methylutens</i>      | GCA_000970325.1_ASM97032v1_genomic.fna                               |
| 212 | <i>Desulfurococcus amylolyticus</i>      | GCA_000231015.3_ASM23101v3_genomic.fna                               |
| 213 | <i>Aeropyrum camini</i>                  | GCA_000591035.1_ASM59103v1_genomic.fna                               |
| 214 | <i>Methanoculleus bourgensis</i>         | GCA_900079125.1_MBBA_genomic.fna                                     |
| 215 | <i>Haloarcula hispanica</i>              | GCA_000504565.2_ASM50456v2_genomic.fna                               |
| 216 | <i>Thermococcus barophilus</i>           | GCA_001433455.1_ASM143345v1_genomic.fna                              |
| 217 | <i>Haloquadratum walsbyi</i>             | GCA_000009185.1_ASM918v1_genomic.fna                                 |
| 218 | <i>Metallosphaera sedula</i>             | GCA_001266655.1_ASM126665v1_genomic.fna                              |
| 219 | <i>Sulfolobus acidocaldarius</i>         | GCA_000338775.1_ASM33877v1_genomic.fna                               |
| 220 | <i>Methanosarcina mazei</i>              | GCA_000007065.1_ASM706v1_genomic.fna                                 |
| 221 | <i>Pyrococcus furiosus</i>               | GCA_000275605.1_ASM27560v1_genomic.fna                               |
| 222 | <i>Halobacterium salinarum</i>           | GCA_000069025.1_ASM6902v1_genomic.fna                                |
| 223 | <i>Archaeoglobus fulgidus</i>            | GCA_000734035.1_ASM73403v1_genomic.fna                               |
| 224 | <i>Methanosarcina barkeri</i>            | GCA_000970305.1_ASM97030v1_genomic.fna                               |
| 225 | <i>Sulfolobus solfataricus</i>           | GCA_000007005.1_ASM700v1_genomic.fna                                 |
| 226 | <i>Sulfolobus islandicus</i>             | GCA_000022405.1_ASM2240v1_genomic.fna                                |
| 227 | <i>Methanococcus maripaludis</i>         | GCA_000220645.1_ASM22064v1_genomic.fna                               |
| 228 | <i>Methanococcus maripaludis</i>         | GCA_000011585.1_ASM1158v1_genomic.fna                                |
| 229 | <i>Sulfolobus islandicus</i>             | GCA_000022425.1_ASM2242v1_genomic.fna                                |
| 230 | <i>Sulfolobus solfataricus</i>           | GCA_000024745.1_ASM2474v1_genomic.fna                                |
| 231 | <i>Methanosarcina barkeri</i>            | GCA_000195895.1_ASM19589v1_genomic.fna                               |
| 232 | <i>Methanosarcina mazei</i>              | GCA_000970165.1_ASM97016v1_genomic.fna                               |
| 233 | <i>Sulfolobus acidocaldarius</i>         | GCA_000340315.1_ASM34031v1_genomic.fna                               |
| 234 | <i>Metallosphaera sedula</i>             | GCA_001266675.1_ASM126667v1_genomic.fna                              |
| 235 | <i>Methanobacterium formicicum</i>       | GCA_000953115.1_DSM1535_genomic.fna                                  |

|     |                                    |                                         |
|-----|------------------------------------|-----------------------------------------|
| 236 | <i>Methanosarcina siciliae</i>     | GCA_000970125.1_ASM97012v1_genomic.fna  |
| 237 | <i>Methanobacterium formicicum</i> | GCA_001458655.1_Mb9_genomic.fna         |
| 238 | <i>Metallosphaera sedula</i>       | GCA_001266695.1_ASM126669v1_genomic.fna |
| 239 | <i>Sulfolobus acidocaldarius</i>   | GCA_002215405.1_ASM221540v1_genomic.fna |
| 240 | <i>Methanosarcina mazei</i>        | GCA_000970185.1_ASM97018v1_genomic.fna  |
| 241 | <i>Methanosarcina barkeri</i>      | GCA_000969985.1_ASM96998v1_genomic.fna  |
| 242 | <i>Sulfolobus solfataricus</i>     | GCA_000968355.1_ASM96835v1_genomic.fna  |
| 243 | <i>Sulfolobus islandicus</i>       | GCA_000022445.1_ASM2244v1_genomic.fna   |
| 244 | <i>Methanococcus maripaludis</i>   | GCA_000016125.1_ASM1612v1_genomic.fna   |
| 245 | <i>Methanococcus maripaludis</i>   | GCA_000018485.1_ASM1848v1_genomic.fna   |
| 246 | <i>Sulfolobus islandicus</i>       | GCA_000022465.1_ASM2246v1_genomic.fna   |
| 247 | <i>Sulfolobus solfataricus</i>     | GCA_000968395.1_ASM96839v1_genomic.fna  |
| 248 | <i>Methanosarcina barkeri</i>      | GCA_000970065.1_ASM97006v1_genomic.fna  |
| 249 | <i>Methanosarcina mazei</i>        | GCA_000970225.1_ASM97022v1_genomic.fna  |
| 250 | <i>Sulfolobus acidocaldarius</i>   | GCA_002215445.1_ASM221544v1_genomic.fna |
| 251 | <i>Metallosphaera sedula</i>       | GCA_001266715.1_ASM126671v1_genomic.fna |
| 252 | <i>Metallosphaera sedula</i>       | GCA_001266735.1_ASM126673v1_genomic.fna |
| 253 | <i>Sulfolobus acidocaldarius</i>   | GCA_002215485.1_ASM221548v1_genomic.fna |
| 254 | <i>Methanosarcina mazei</i>        | GCA_000970245.1_ASM97024v1_genomic.fna  |
| 255 | <i>Methanosarcina barkeri</i>      | GCA_001027005.1_ASM102700v1_genomic.fna |
| 256 | <i>Sulfolobus solfataricus</i>     | GCA_000968435.1_ASM96843v1_genomic.fna  |
| 257 | <i>Sulfolobus islandicus</i>       | GCA_000022485.1_ASM2248v1_genomic.fna   |
| 258 | <i>Sulfolobus islandicus</i>       | GCA_000189555.1_ASM18955v1_genomic.fna  |
| 259 | <i>Sulfolobus acidocaldarius</i>   | GCA_002215525.1_ASM221552v1_genomic.fna |
| 260 | <i>Sulfolobus acidocaldarius</i>   | GCA_002215565.1_ASM221556v1_genomic.fna |
| 261 | <i>Sulfolobus islandicus</i>       | GCA_000189575.1_ASM18957v1_genomic.fna  |
| 262 | <i>Sulfolobus islandicus</i>       | GCA_000364745.1_ASM36474v1_genomic.fna  |
| 263 | <i>Sulfolobus acidocaldarius</i>   | GCA_000508305.1_ASM50830v1_genomic.fna  |
| 264 | <i>Methanosarcina mazei</i>        | GCA_000341715.1_ASM34171v1_genomic.fna  |
| 265 | <i>Campylobacter jejuni</i>        | GCA_000009085.1_ASM908v1_genomic.fna    |
| 266 | <i>Pseudomonas fluorescens</i>     | GCA_000237065.1_ASM23706v1_genomic.fna  |
| 267 | <i>Salmonella enterica</i>         | GCA_000195995.1_ASM19599v1_genomic.fna  |
| 268 | <i>Xanthomonas campestris</i>      | GCA_000007145.1_ASM714v1_genomic.fna    |
| 269 | <i>Yersinia pestis</i>             | GCA_000009065.1_ASM906v1_genomic.fna    |



|     |                                        |                                         |
|-----|----------------------------------------|-----------------------------------------|
| 270 | <i>Staphylococcus aureus</i>           | GCA_000013425.1_ASM1342v1_genomic.fna   |
| 271 | <i>Staphylococcus epidermidis</i>      | GCA_000007645.1_ASM764v1_genomic.fna    |
| 272 | <i>Lactococcus lactis</i>              | GCA_000006865.1_ASM686v1_genomic.fna    |
| 273 | <i>Bacillus cereus</i>                 | GCA_000007825.1_ASM782v1_genomic.fna    |
| 274 | <i>Clostridium perfringens</i>         | GCA_000013285.1_ASM1328v1_genomic.fna   |
| 275 | <i>Listeria monocytogenes</i>          | GCA_000196035.1_ASM19603v1_genomic.fna  |
| 276 | <i>Mycobacterium avium</i>             | GCA_000007865.1_ASM786v1_genomic.fna    |
| 277 | <i>Actinobacillus pleuropneumoniae</i> | GCA_000015885.1_ASM1588v1_genomic.fna   |
| 278 | <i>Tropheryma whipplei</i>             | GCA_000007485.1_ASM748v1_genomic.fna    |
| 279 | <i>Prochlorococcus marinus</i>         | GCA_000007925.1_ASM792v1_genomic.fna    |
| 280 | <i>Haemophilus influenzae</i>          | GCA_000027305.1_ASM2730v1_genomic.fna   |
| 281 | <i>Mycobacterium tuberculosis</i>      | GCA_000195955.2_ASM19595v2_genomic.fna  |
| 282 | <i>Escherichia coli</i>                | GCA_000008865.1_ASM886v1_genomic.fna    |
| 283 | <i>Helicobacter pylori</i>             | GCA_000008525.1_ASM852v1_genomic.fna    |
| 284 | <i>Chlamydomphila pneumoniae</i>       | GCA_000008745.1_ASM874v1_genomic.fna    |
| 285 | <i>Buchnera aphidicola</i>             | GCA_000007365.1_ASM736v1_genomic.fna    |
| 286 | <i>Neisseria meningitidis</i>          | GCA_000008805.1_ASM880v1_genomic.fna    |
| 287 | <i>Xylella fastidiosa</i>              | GCA_000006725.1_ASM672v1_genomic.fna    |
| 288 | <i>Streptococcus pyogenes</i>          | GCA_000006785.2_ASM678v2_genomic.fna    |
| 289 | <i>Streptococcus pneumoniae</i>        | GCA_000007045.1_ASM704v1_genomic.fna    |
| 290 | <i>Agrobacterium radiobacter</i>       | GCA_000016265.1_ASM1626v1_genomic.fna   |
| 291 | <i>Xanthomonas axonopodis</i>          | GCA_000348585.1_ASM34858v1_genomic.fna  |
| 292 | <i>Leptospira interrogans</i>          | GCA_000092565.1_ASM9256v1_genomic.fna   |
| 293 | <i>Fusobacterium nucleatum</i>         | GCA_000007325.1_ASM732v1_genomic.fna    |
| 294 | <i>Bacillus anthracis</i>              | GCA_000007845.1_ASM784v1_genomic.fna    |
| 295 | <i>Shigella flexneri</i>               | GCA_000006925.2_ASM692v2_genomic.fna    |
| 296 | <i>Bifidobacterium longum</i>          | GCA_000007525.1_ASM752v1_genomic.fna    |
| 297 | <i>Haemophilus somnus</i>              | GCA_000019405.1_ASM1940v1_genomic.fna   |
| 298 | <i>Pseudomonas syringae</i>            | GCA_000012245.1_ASM1224v1_genomic.fna   |
| 299 | <i>Streptococcus agalactiae</i>        | GCA_000007265.1_ASM726v1_genomic.fna    |
| 300 | <i>Pseudomonas aeruginosa</i>          | GCA_000006765.1_ASM676v1_genomic.fna    |
| 301 | <i>Vibrio vulnificus</i>               | GCA_002215135.1_ASM221513v1_genomic.fna |
| 302 | <i>Mycoplasma hyopneumoniae</i>        | GCA_000008205.1_ASM820v1_genomic.fna    |
| 303 | <i>Streptococcus suis</i>              | GCA_000026745.1_ASM2674v1_genomic.fna   |

|     |                                    |                                         |
|-----|------------------------------------|-----------------------------------------|
| 304 | <i>Chlorobium phaeobacteroides</i> | GCA_000015125.1_ASM1512v1_genomic.fna   |
| 305 | <i>Paenarthrobacter aurescens</i>  | GCA_000014925.1_ASM1492v1_genomic.fna   |
| 306 | <i>Acinetobacter baumannii</i>     | GCA_000746645.1_ASM74664v1_genomic.fna  |
| 307 | <i>Anaplasma marginale</i>         | GCA_000020305.1_ASM2030v1_genomic.fna   |
| 308 | <i>Bacillus licheniformis</i>      | GCA_000011645.1_ASM1164v1_genomic.fna   |
| 309 | <i>Bacteroides fragilis</i>        | GCA_000009925.1_ASM992v1_genomic.fna    |
| 310 | <i>Shigella dysenteriae</i>        | GCA_000012005.1_ASM1200v1_genomic.fna   |
| 311 | <i>Legionella pneumophila</i>      | GCA_000008485.1_ASM848v1_genomic.fna    |
| 312 | <i>Shigella sonnei</i>             | GCA_000092525.1_ASM9252v1_genomic.fna   |
| 313 | <i>Streptococcus thermophilus</i>  | GCA_000253395.1_ASM25339v1_genomic.fna  |
| 314 | <i>Wolbachia endosymbiont</i>      | GCA_000008385.1_ASM838v1_genomic.fna    |
| 315 | <i>Shewanella baltica</i>          | GCA_000178875.2_ASM17887v2_genomic.fna  |
| 316 | <i>Synechococcus elongatus</i>     | GCA_000010065.1_ASM1006v1_genomic.fna   |
| 317 | <i>Shewanella putrefaciens</i>     | GCA_000016585.1_ASM1658v1_genomic.fna   |
| 318 | <i>Ehrlichia ruminantium</i>       | GCA_000026005.1_ASM2600v1_genomic.fna   |
| 319 | <i>Lactobacillus reuteri</i>       | GCA_000016825.1_ASM1682v1_genomic.fna   |
| 320 | <i>Bacillus pumilus</i>            | GCA_001578205.1_ASM157820v1_genomic.fna |
| 321 | <i>Thermus thermophilus</i>        | GCA_000091545.1_ASM9154v1_genomic.fna   |
| 322 | <i>Corynebacterium glutamicum</i>  | GCA_000011325.1_ASM1132v1_genomic.fna   |
| 323 | <i>Chlamydia trachomatis</i>       | GCA_000008725.1_ASM872v1_genomic.fna    |
| 324 | <i>Mycoplasma genitalium</i>       | GCA_000027325.1_ASM2732v1_genomic.fna   |
| 325 | <i>Burkholderia cenocepacia</i>    | GCA_000009485.1_ASM948v1_genomic.fna    |
| 326 | <i>Burkholderia pseudomallei</i>   | GCA_000011545.1_ASM1154v1_genomic.fna   |
| 327 | <i>Burkholderia mallei</i>         | GCA_000011705.1_ASM1170v1_genomic.fna   |
| 328 | <i>Corynebacterium jeikeium</i>    | GCA_000006605.1_ASM660v1_genomic.fna    |
| 329 | <i>Ehrlichia chaffeensis</i>       | GCA_000013145.1_ASM1314v1_genomic.fna   |
| 330 | <i>Nitrosococcus oceani</i>        | GCA_000012805.1_ASM1280v1_genomic.fna   |
| 331 | <i>Bacillus thuringiensis</i>      | GCA_000008505.1_ASM850v1_genomic.fna    |
| 332 | <i>Ralstonia solanacearum</i>      | GCA_000009125.1_ASM912v1_genomic.fna    |
| 333 | <i>Shigella boydii</i>             | GCA_000012025.1_ASM1202v1_genomic.fna   |
| 334 | <i>Mycobacterium ulcerans</i>      | GCA_000013925.2_ASM1392v2_genomic.fna   |
| 335 | <i>Vibrio cholerae</i>             | GCA_000006745.1_ASM674v1_genomic.fna    |
| 336 | <i>Streptococcus salivarius</i>    | GCA_000785515.1_ASM78551v1_genomic.fna  |
| 337 | <i>Rhodopseudomonas palustris</i>  | GCA_000013365.1_ASM1336v1_genomic.fna   |

|     |                                       |                                         |
|-----|---------------------------------------|-----------------------------------------|
| 338 | <i>Rhodobacter sphaeroides</i>        | GCA_000016405.1_ASM1640v1_genomic.fna   |
| 339 | <i>Yersinia pseudotuberculosis</i>    | GCA_000016945.1_ASM1694v1_genomic.fna   |
| 340 | <i>Francisella tularensis</i>         | GCA_000008985.1_ASM898v1_genomic.fna    |
| 341 | <i>Lactobacillus delbrueckii</i>      | GCA_000056065.1_ASM5606v1_genomic.fna   |
| 342 | <i>Mycoplasma agalactiae</i>          | GCA_000063605.1_ASM6360v1_genomic.fna   |
| 343 | <i>Leptospira borgpetersenii</i>      | GCA_000013945.1_ASM1394v1_genomic.fna   |
| 344 | <i>Brucella abortus</i>               | GCA_000008145.1_ASM814v1_genomic.fna    |
| 345 | <i>Mycoplasma capricolum</i>          | GCA_000012765.1_ASM1276v1_genomic.fna   |
| 346 | <i>Bartonella bacilliformis</i>       | GCA_000015445.1_ASM1544v1_genomic.fna   |
| 347 | <i>Xanthomonas citri</i>              | GCA_002218245.1_ASM221824v1_genomic.fna |
| 348 | <i>Campylobacter fetus</i>            | GCA_000495505.1_ASM49550v1_genomic.fna  |
| 349 | <i>Streptococcus mitis</i>            | GCA_000027165.1_ASM2716v1_genomic.fna   |
| 350 | <i>Xanthomonas oryzae</i>             | GCA_000019585.2_ASM1958v2_genomic.fna   |
| 351 | <i>Sodalis glossinidius</i>           | GCA_000010085.1_ASM1008v1_genomic.fna   |
| 352 | <i>Thermotoga neapolitana</i>         | GCA_000018945.1_ASM1894v1_genomic.fna   |
| 353 | <i>Salinispora tropica</i>            | GCA_000016425.1_ASM1642v1_genomic.fna   |
| 354 | <i>Clostridioides difficile</i>       | GCA_000009205.1_ASM920v1_genomic.fna    |
| 355 | <i>Roseobacter denitrificans</i>      | GCA_000014045.1_ASM1404v1_genomic.fna   |
| 356 | <i>Ralstonia eutropha</i>             | GCA_000203875.1_ASM20387v1_genomic.fna  |
| 357 | <i>Aeromonas salmonicida</i>          | GCA_000196395.1_ASM19639v1_genomic.fna  |
| 358 | <i>Desulfitobacterium hafniense</i>   | GCA_000021925.1_ASM2192v1_genomic.fna   |
| 359 | <i>Oenococcus oeni</i>                | GCA_000014385.1_ASM1438v1_genomic.fna   |
| 360 | <i>Coxiella burnetii</i>              | GCA_000007765.2_ASM776v2_genomic.fna    |
| 361 | <i>Lactobacillus casei</i>            | GCA_000019245.3_ASM1924v3_genomic.fna   |
| 362 | <i>Salinispora arenicola</i>          | GCA_000018265.1_ASM1826v1_genomic.fna   |
| 363 | <i>Desulfovibrio vulgaris</i>         | GCA_000021385.1_ASM2138v1_genomic.fna   |
| 364 | <i>Delftia acidovorans</i>            | GCA_000018665.1_ASM1866v1_genomic.fna   |
| 365 | <i>Rickettsia bellii</i>              | GCA_000012385.1_ASM1238v1_genomic.fna   |
| 366 | <i>Bacillus subtilis</i>              | GCA_000009045.1_ASM904v1_genomic.fna    |
| 367 | <i>Ralstonia pickettii</i>            | GCA_000020205.1_ASM2020v1_genomic.fna   |
| 368 | <i>Lactobacillus helveticus</i>       | GCA_001308285.1_ASM130828v1_genomic.fna |
| 369 | <i>Geobacillus stearothermophilus</i> | GCA_001274575.1_ASM127457v1_genomic.fna |
| 370 | <i>Rickettsia rickettsii</i>          | GCA_000017445.3_ASM1744v3_genomic.fna   |
| 371 | <i>Photobacterium damsela</i>         | GCA_002142615.1_ASM214261v1_genomic.fna |

|     |                                       |                                        |
|-----|---------------------------------------|----------------------------------------|
| 372 | <i>Borrelia afzelii</i>               | GCA_000304735.1_ASM30473v1_genomic.fna |
| 373 | <i>Bifidobacterium adolescentis</i>   | GCA_000010425.1_ASM1042v1_genomic.fna  |
| 374 | <i>Vibrio harveyi</i>                 | GCA_000770115.2_ASM77011v2_genomic.fna |
| 375 | <i>Saccharopolyspora erythraea</i>    | GCA_000062885.1_ASM6288v1_genomic.fna  |
| 376 | <i>Vibrio parahaemolyticus</i>        | GCA_000196095.1_ASM19609v1_genomic.fna |
| 377 | <i>Lactococcus garvieae</i>           | GCA_000269925.1_ASM26992v1_genomic.fna |
| 378 | <i>Methylobacterium extorquens</i>    | GCA_000018845.1_ASM1884v1_genomic.fna  |
| 379 | <i>Methylobacterium radiotolerans</i> | GCA_000019725.1_ASM1972v1_genomic.fna  |
| 380 | <i>Orientia tsutsugamushi</i>         | GCA_000063545.1_ASM6354v1_genomic.fna  |
| 381 | <i>Lactobacillus fermentum</i>        | GCA_000010145.1_ASM1014v1_genomic.fna  |
| 382 | <i>Clostridium kluyveri</i>           | GCA_000016505.1_ASM1650v1_genomic.fna  |
| 383 | <i>Porphyromonas gingivalis</i>       | GCA_000010505.1_ASM1050v1_genomic.fna  |
| 384 | <i>Gramella forsetii</i>              | GCA_000060345.1_ASM6034v1_genomic.fna  |
| 385 | <i>Ureaplasma parvum</i>              | GCA_000019345.1_ASM1934v1_genomic.fna  |
| 386 | <i>Ureaplasma urealyticum</i>         | GCA_000021265.1_ASM2126v1_genomic.fna  |
| 387 | <i>Mycoplasma mycoides</i>            | GCA_000011445.1_ASM1144v1_genomic.fna  |
| 388 | <i>Burkholderia thailandensis</i>     | GCA_000012365.1_ASM1236v1_genomic.fna  |
| 389 | <i>Phaeobacter gallaeciensis</i>      | GCA_000511385.1_ASM51138v1_genomic.fna |
| 390 | <i>Octadecabacter antarcticus</i>     | GCA_000155675.2_ASM15567v2_genomic.fna |
| 391 | <i>Vibrio fischeri</i>                | GCA_000011805.1_ASM1180v1_genomic.fna  |
| 392 | <i>Burkholderia oklahomensis</i>      | GCA_000755985.1_ASM75598v1_genomic.fna |
| 393 | <i>Clostridium botulinum</i>          | GCA_000017045.1_ASM1704v1_genomic.fna  |
| 394 | <i>Burkholderia multivorans</i>       | GCA_000010545.1_ASM1054v1_genomic.fna  |
| 395 | <i>Ochrobactrum anthropi</i>          | GCA_000017405.1_ASM1740v1_genomic.fna  |
| 396 | <i>Rickettsia prowazekii</i>          | GCA_000195735.1_ASM19573v1_genomic.fna |
| 397 | <i>Treponema pallidum</i>             | GCA_000604125.1_ASM60412v1_genomic.fna |
| 398 | <i>Borrelia burgdorferi</i>           | GCA_000008685.2_ASM868v2_genomic.fna   |
| 399 | <i>Rhizobium leguminosarum</i>        | GCA_000021345.1_ASM2134v1_genomic.fna  |
| 400 | <i>Anaeromyxobacter dehalogenans</i>  | GCA_000022145.1_ASM2214v1_genomic.fna  |
| 401 | <i>Clavibacter michiganensis</i>      | GCA_000069225.1_ASM6922v1_genomic.fna  |
| 402 | <i>Leptospira biflexa</i>             | GCA_000017685.1_ASM1768v1_genomic.fna  |
| 403 | <i>Mycobacterium marinum</i>          | GCA_000723425.2_E11_genomic.fna        |
| 404 | <i>Brucella canis</i>                 | GCA_000018525.1_ASM1852v1_genomic.fna  |
| 405 | <i>Burkholderia ambifaria</i>         | GCA_000019925.1_ASM1992v1_genomic.fna  |

|     |                                         |                                         |
|-----|-----------------------------------------|-----------------------------------------|
| 406 | <i>Brucella suis</i>                    | GCA_000007505.1_ASM750v1_genomic.fna    |
| 407 | <i>Enterococcus faecalis</i>            | GCA_000007785.1_ASM778v1_genomic.fna    |
| 408 | <i>Bradyrhizobium japonicum</i>         | GCA_000284375.1_ASM28437v1_genomic.fna  |
| 409 | <i>Bifidobacterium dentium</i>          | GCA_001042595.1_ASM104259v1_genomic.fna |
| 410 | <i>Klebsiella pneumoniae</i>            | GCA_000240185.2_ASM24018v2_genomic.fna  |
| 411 | <i>Gluconacetobacter diazotrophicus</i> | GCA_000021325.1_ASM2132v1_genomic.fna   |
| 412 | <i>Microcystis aeruginosa</i>           | GCA_000010625.1_ASM1062v1_genomic.fna   |
| 413 | <i>Streptococcus dysgalactiae</i>       | GCA_000317855.1_ASM31785v1_genomic.fna  |
| 414 | <i>Rhizobium etli</i>                   | GCA_000092045.1_ASM9204v1_genomic.fna   |
| 415 | <i>Chromohalobacter salexigens</i>      | GCA_000055785.1_ASM5578v1_genomic.fna   |
| 416 | <i>Bartonella tribocorum</i>            | GCA_000196435.1_ASM19643v1_genomic.fna  |
| 417 | <i>Ruminiclostridium thermocellum</i>   | GCA_000015865.1_ASM1586v1_genomic.fna   |
| 418 | <i>Streptomyces clavuligerus</i>        | GCA_001693675.1_ASM169367v1_genomic.fna |
| 419 | <i>Borrelia garinii</i>                 | GCA_001922545.1_ASM192254v1_genomic.fna |
| 420 | <i>Chlamydia psittaci</i>               | GCA_000204255.1_ASM20425v1_genomic.fna  |
| 421 | <i>Bifidobacterium animalis</i>         | GCA_000022965.1_ASM2296v1_genomic.fna   |
| 422 | <i>Bacillus amyloliquefaciens</i>       | GCA_000196735.1_ASM19673v1_genomic.fna  |
| 423 | <i>Streptococcus mutans</i>             | GCA_000007465.2_ASM746v2_genomic.fna    |
| 424 | <i>Comamonas testosteroni</i>           | GCA_000739375.1_ASM73937v1_genomic.fna  |
| 425 | <i>Enterococcus faecium</i>             | GCA_000174395.2_ASM17439v2_genomic.fna  |
| 426 | <i>Neisseria gonorrhoeae</i>            | GCA_000006845.1_ASM684v1_genomic.fna    |
| 427 | <i>Bacillus mycoides</i>                | GCA_000832605.1_ASM83260v1_genomic.fna  |
| 428 | <i>Yersinia frederiksenii</i>           | GCA_000834215.1_ASM83421v1_genomic.fna  |
| 429 | <i>Yersinia kristensenii</i>            | GCA_000834865.1_ASM83486v1_genomic.fna  |
| 430 | <i>Alteromonas macleodii</i>            | GCA_000172635.2_ASM17263v2_genomic.fna  |
| 431 | <i>Stenotrophomonas maltophilia</i>     | GCA_000072485.1_ASM7248v1_genomic.fna   |
| 432 | <i>Bifidobacterium bifidum</i>          | GCA_000165905.1_ASM16590v1_genomic.fna  |
| 433 | <i>Micrococcus luteus</i>               | GCA_000023205.1_ASM2320v1_genomic.fna   |
| 434 | <i>Streptococcus equi</i>               | GCA_000026605.1_ASM2660v1_genomic.fna   |
| 435 | <i>Zymomonas mobilis</i>                | GCA_000218875.1_ASM21887v1_genomic.fna  |
| 436 | <i>Haemophilus parasuis</i>             | GCA_000021885.1_ASM2188v1_genomic.fna   |
| 437 | <i>Mycobacterium leprae</i>             | GCA_000195855.1_ASM19585v1_genomic.fna  |
| 438 | <i>Acetobacter pasteurianus</i>         | GCA_001766235.1_ASM176623v1_genomic.fna |
| 439 | <i>Francisella tularensis</i>           | GCA_000834965.1_ASM83496v1_genomic.fna  |

|     |                                       |                                         |
|-----|---------------------------------------|-----------------------------------------|
| 440 | <i>Pasteurella multocida</i>          | GCA_000754275.1_ASM75427v1_genomic.fna  |
| 441 | <i>Lactobacillus rhamnosus</i>        | GCA_000026505.1_ASM2650v1_genomic.fna   |
| 442 | <i>Francisella philomiragia</i>       | GCA_000019285.1_ASM1928v1_genomic.fna   |
| 443 | <i>Thermomicrobium roseum</i>         | GCA_000021685.1_ASM2168v1_genomic.fna   |
| 444 | <i>Fibrobacter succinogenes</i>       | GCA_000146505.1_ASM14650v1_genomic.fna  |
| 445 | <i>Brucella pinnipedialis</i>         | GCA_000221005.1_ASM22100v1_genomic.fna  |
| 446 | <i>Brucella ceti</i>                  | GCA_000590795.1_ASM59079v1_genomic.fna  |
| 447 | <i>Enterococcus gallinarum</i>        | GCA_001558875.1_ASM155887v1_genomic.fna |
| 448 | <i>Enterococcus casseliflavus</i>     | GCA_000157355.2_ASM15735v2_genomic.fna  |
| 449 | <i>Caulobacter crescentus</i>         | GCA_000006905.1_ASM690v1_genomic.fna    |
| 450 | <i>Brucella melitensis</i>            | GCA_000007125.1_ASM712v1_genomic.fna    |
| 451 | <i>Dickeya dadantii</i>               | GCA_000147055.1_ASM14705v1_genomic.fna  |
| 452 | <i>Burkholderia glumae</i>            | GCA_000022645.2_ASM2264v1_genomic.fna   |
| 453 | <i>Clostridium sporogenes</i>         | GCA_000973705.1_ASM97370v1_genomic.fna  |
| 454 | <i>Streptococcus infantarius</i>      | GCA_000246835.1_ASM24683v1_genomic.fna  |
| 455 | <i>Providencia stuartii</i>           | GCA_000259175.1_ASM25917v1_genomic.fna  |
| 456 | <i>Parvimonas micra</i>               | GCA_000800295.1_ASM80029v1_genomic.fna  |
| 457 | <i>Desulfovibrio piger</i>            | GCA_900116045.1_DESPIGER_genomic.fna    |
| 458 | <i>Bacteroides caccae</i>             | GCA_002222615.2_ASM222261v2_genomic.fna |
| 459 | <i>Bacteroides ovatus</i>             | GCA_001314995.1_ASM131499v1_genomic.fna |
| 460 | <i>Treponema denticola</i>            | GCA_000008185.1_ASM818v1_genomic.fna    |
| 461 | <i>Azotobacter vinelandii</i>         | GCA_000380335.1_ASM38033v1_genomic.fna  |
| 462 | <i>Mesorhizobium loti</i>             | GCA_000009625.1_ASM962v1_genomic.fna    |
| 463 | <i>Sinorhizobium meliloti</i>         | GCA_000006965.1_ASM696v1_genomic.fna    |
| 464 | <i>Methylococcus capsulatus</i>       | GCA_000008325.1_ASM832v1_genomic.fna    |
| 465 | <i>Bordetella bronchiseptica</i>      | GCA_000318015.1_ASM31801v1_genomic.fna  |
| 466 | <i>Bordetella pertussis</i>           | GCA_000195715.1_ASM19571v1_genomic.fna  |
| 467 | <i>Bordetella parapertussis</i>       | GCA_000317935.1_ASM31793v1_genomic.fna  |
| 468 | <i>Haemophilus ducreyi</i>            | GCA_000007945.1_ASM794v1_genomic.fna    |
| 469 | <i>Rickettsia conorii</i>             | GCA_000007025.1_ASM702v1_genomic.fna    |
| 470 | <i>Dichelobacter nodosus</i>          | GCA_000015345.1_ASM1534v1_genomic.fna   |
| 471 | <i>Nitrosomonas europaea</i>          | GCA_000009145.1_ASM914v1_genomic.fna    |
| 472 | <i>Acidithiobacillus ferrooxidans</i> | GCA_000021485.1_ASM2148v1_genomic.fna   |
| 473 | <i>Rhodospirillum rubrum</i>          | GCA_000013085.1_ASM1308v1_genomic.fna   |

|     |                                           |                                         |
|-----|-------------------------------------------|-----------------------------------------|
| 474 | <i>Chloroflexus aurantiacus</i>           | GCA_000018865.1_ASM1886v1_genomic.fna   |
| 475 | <i>Ruminococcus albus</i>                 | GCA_000179635.2_ASM17963v2_genomic.fna  |
| 476 | <i>Cytophaga hutchinsonii</i>             | GCA_000014145.1_ASM1414v1_genomic.fna   |
| 477 | <i>Deinococcus radiodurans</i>            | GCA_000008565.1_ASM856v1_genomic.fna    |
| 478 | <i>Streptococcus gordonii</i>             | GCA_000017005.1_ASM1700v1_genomic.fna   |
| 479 | <i>Clostridium acetobutylicum</i>         | GCA_000008765.1_ASM876v1_genomic.fna    |
| 480 | <i>Lactobacillus gasseri</i>              | GCA_000014425.1_ASM1442v1_genomic.fna   |
| 481 | <i>Corynebacterium diphtheriae</i>        | GCA_001457455.1_NCTC11397_genomic.fna   |
| 482 | <i>Listeria innocua</i>                   | GCA_000195795.1_ASM19579v1_genomic.fna  |
| 483 | <i>Mycobacterium smegmatis</i>            | GCA_000015005.1_ASM1500v1_genomic.fna   |
| 484 | <i>Thermobifida fusca</i>                 | GCA_000012405.1_ASM1240v1_genomic.fna   |
| 485 | <i>Mycoplasma pneumoniae</i>              | GCA_000027345.1_ASM2734v1_genomic.fna   |
| 486 | <i>Mycoplasma pulmonis</i>                | GCA_000195875.1_ASM19587v1_genomic.fna  |
| 487 | <i>Thermotoga maritima</i>                | GCA_000008545.1_ASM854v1_genomic.fna    |
| 488 | <i>Mycoplasma penetrans</i>               | GCA_000011225.1_ASM1122v1_genomic.fna   |
| 489 | <i>Geobacter metallireducens</i>          | GCA_000012925.1_ASM1292v1_genomic.fna   |
| 490 | <i>Streptomyces avermitilis</i>           | GCA_000009765.2_ASM976v2_genomic.fna    |
| 491 | <i>Yersinia enterocolitica</i>            | GCA_000009345.1_ASM934v1_genomic.fna    |
| 492 | <i>Geobacter sulfurreducens</i>           | GCA_000007985.2_ASM798v2_genomic.fna    |
| 493 | <i>Spiroplasma kunkelii</i>               | GCA_001274875.1_ASM127487v1_genomic.fna |
| 494 | <i>Novosphingobium aromaticivorans</i>    | GCA_000013325.1_ASM1332v1_genomic.fna   |
| 495 | <i>Dehalococcoides mccartyi</i>           | GCA_000011905.1_ASM1190v1_genomic.fna   |
| 496 | <i>Aquifex aeolicus</i>                   | GCA_000008625.1_ASM862v1_genomic.fna    |
| 497 | <i>Nostoc punctiforme</i>                 | GCA_000020025.1_ASM2002v1_genomic.fna   |
| 498 | <i>Chlamydomonas reinhardtii</i>          | GCA_000007605.1_ASM760v1_genomic.fna    |
| 499 | <i>Chlamydia muridarum</i>                | GCA_000006685.1_ASM668v1_genomic.fna    |
| 500 | <i>Bacillus halodurans</i>                | GCA_000011145.1_ASM1114v1_genomic.fna   |
| 501 | <i>Streptomyces coelicolor</i>            | GCA_000203835.1_ASM20383v1_genomic.fna  |
| 502 | <i>Cupriavidus metallidurans</i>          | GCA_000196015.1_ASM19601v1_genomic.fna  |
| 503 | <i>Carboxydotherrhus hydrogenoformans</i> | GCA_000012865.1_ASM1286v1_genomic.fna   |
| 504 | <i>Paraburkholderia xenovorans</i>        | GCA_000013645.1_ASM1364v1_genomic.fna   |
| 505 | <i>Wolbachia endosymbiont</i>             | GCA_000008025.1_ASM802v1_genomic.fna    |
| 506 | <i>Wigglesworthia glossinidia</i>         | GCA_000008885.1_ASM888v1_genomic.fna    |
| 507 | <i>Ruegeria pomeroyi</i>                  | GCA_000011965.2_ASM1196v2_genomic.fna   |

|     |                                      |                                         |
|-----|--------------------------------------|-----------------------------------------|
| 508 | <i>Oceanobacillus iheyensis</i>      | GCA_000011245.1_ASM1124v1_genomic.fna   |
| 509 | <i>Colwellia psychrerythraea</i>     | GCA_000012325.1_ASM1232v1_genomic.fna   |
| 510 | <i>Corynebacterium efficiens</i>     | GCA_000011305.1_ASM1130v1_genomic.fna   |
| 511 | <i>Thermosynechococcus elongatus</i> | GCA_000011345.1_ASM1134v1_genomic.fna   |
| 512 | <i>Chlorobium tepidum</i>            | GCA_000006985.1_ASM698v1_genomic.fna    |
| 513 | <i>Leuconostoc mesenteroides</i>     | GCA_000014445.1_ASM1444v1_genomic.fna   |
| 514 | <i>Saccharophagus degradans</i>      | GCA_000013665.1_ASM1366v1_genomic.fna   |
| 515 | <i>Trichodesmium erythraeum</i>      | GCA_000014265.1_ASM1426v1_genomic.fna   |
| 516 | <i>Shewanella oneidensis</i>         | GCA_000146165.2_ASM14616v2_genomic.fna  |
| 517 | <i>Anaplasma phagocytophilum</i>     | GCA_000013125.1_ASM1312v1_genomic.fna   |
| 518 | <i>Bordetella avium</i>              | GCA_000070465.1_ASM7046v1_genomic.fna   |
| 519 | <i>Chlamydia abortus</i>             | GCA_000026025.1_ASM2602v1_genomic.fna   |
| 520 | <i>Acidobacterium capsulatum</i>     | GCA_000022565.1_ASM2256v1_genomic.fna   |
| 521 | <i>Neorickettsia sennetsu</i>        | GCA_000013165.1_ASM1316v1_genomic.fna   |
| 522 | <i>Pectobacterium atrosepticum</i>   | GCA_000011605.1_ASM1160v1_genomic.fna   |
| 523 | <i>Salmonella bongori</i>            | GCA_000252995.1_ASM25299v1_genomic.fna  |
| 524 | <i>Streptococcus uberis</i>          | GCA_000009545.1_ASM954v1_genomic.fna    |
| 525 | <i>Chlamydia felis</i>               | GCA_000009945.1_ASM994v1_genomic.fna    |
| 526 | <i>Bacteroides thetaiotaomicron</i>  | GCA_000011065.1_ASM1106v1_genomic.fna   |
| 527 | <i>Rhodopirellula baltica</i>        | GCA_000196115.1_ASM19611v1_genomic.fna  |
| 528 | <i>Bartonella quintana</i>           | GCA_000046685.1_ASM4668v1_genomic.fna   |
| 529 | <i>Rhodobacter capsulatus</i>        | GCA_000021865.1_ASM2186v1_genomic.fna   |
| 530 | <i>Clostridium tetani</i>            | GCA_000007625.1_ASM762v1_genomic.fna    |
| 531 | <i>Lactobacillus acidophilus</i>     | GCA_000011985.1_ASM1198v1_genomic.fna   |
| 532 | <i>Lawsonia intracellularis</i>      | GCA_000055945.1_ASM5594v1_genomic.fna   |
| 533 | <i>Helicobacter hepaticus</i>        | GCA_000007905.1_ASM790v1_genomic.fna    |
| 534 | <i>Bartonella henselae</i>           | GCA_000046705.1_ASM4670v1_genomic.fna   |
| 535 | <i>Leifsonia xyli</i>                | GCA_000470775.1_ASM47077v1_genomic.fna  |
| 536 | <i>Mannheimia haemolytica</i>        | GCA_000376645.1_ASM37664v1_genomic.fna  |
| 537 | <i>Lactobacillus plantarum</i>       | GCA_000203855.3_ASM20385v3_genomic.fna  |
| 538 | <i>Pediococcus pentosaceus</i>       | GCA_000014505.1_ASM1450v1_genomic.fna   |
| 539 | <i>Lactobacillus brevis</i>          | GCA_000014465.1_ASM1446v1_genomic.fna   |
| 540 | <i>Brevibacterium linens</i>         | GCA_001606005.1_ASM160600v1_genomic.fna |
| 541 | <i>Serratia marcescens</i>           | GCA_000513215.1_DB11_genomic.fna        |



|     |                                      |                                         |
|-----|--------------------------------------|-----------------------------------------|
| 542 | <i>Mycoplasma gallisepticum</i>      | GCA_000092585.1_ASM9258v1_genomic.fna   |
| 543 | <i>Wolinella succinogenes</i>        | GCA_000196135.1_ASM19613v1_genomic.fna  |
| 544 | <i>Chromobacterium violaceum</i>     | GCA_000007705.1_ASM770v1_genomic.fna    |
| 545 | <i>Myxococcus xanthus</i>            | GCA_000012685.1_ASM1268v1_genomic.fna   |
| 546 | <i>Mycoplasma arthritidis</i>        | GCA_000020065.1_ASM2006v1_genomic.fna   |
| 547 | <i>Photorhabdus luminescens</i>      | GCA_000196155.1_ASM19615v1_genomic.fna  |
| 548 | <i>Gloeobacter violaceus</i>         | GCA_000011385.1_ASM1138v1_genomic.fna   |
| 549 | Onion yellows                        | GCA_000009845.1_ASM984v1_genomic.fna    |
| 550 | <i>Methylobacillus flagellatus</i>   | GCA_000013705.1_ASM1370v1_genomic.fna   |
| 551 | <i>Moorella thermoacetica</i>        | GCA_000013105.1_ASM1310v1_genomic.fna   |
| 552 | <i>Exiguobacterium sibiricum</i>     | GCA_000019905.1_ASM1990v1_genomic.fna   |
| 553 | <i>Mesoplasma florum</i>             | GCA_000008305.1_ASM830v1_genomic.fna    |
| 554 | <i>Rubrobacter xylanophilus</i>      | GCA_000014185.1_ASM1418v1_genomic.fna   |
| 555 | <i>Kineococcus radiotolerans</i>     | GCA_000017305.1_ASM1730v1_genomic.fna   |
| 556 | <i>Ehrlichia canis</i>               | GCA_000012565.1_ASM1256v1_genomic.fna   |
| 557 | <i>Burkholderia vietnamiensis</i>    | GCA_000959445.1_ASM95944v1_genomic.fna  |
| 558 | <i>Methylibium petroleiphilum</i>    | GCA_000015725.1_ASM1572v1_genomic.fna   |
| 559 | <i>Propionibacterium acnes</i>       | GCA_000008345.1_ASM834v1_genomic.fna    |
| 560 | <i>Baumannia cicadellinicola</i>     | GCA_000013185.1_ASM1318v1_genomic.fna   |
| 561 | <i>Staphylococcus haemolyticus</i>   | GCA_000009865.1_ASM986v1_genomic.fna    |
| 562 | <i>Brucella ovis</i>                 | GCA_000016845.1_ASM1684v1_genomic.fna   |
| 563 | <i>Campylobacter coli</i>            | GCA_002024185.1_ASM202418v1_genomic.fna |
| 564 | <i>Mycoplasma bovis</i>              | GCA_000183385.1_ASM18338v1_genomic.fna  |
| 565 | <i>Campylobacter lari</i>            | GCA_000019205.1_ASM1920v1_genomic.fna   |
| 566 | <i>Persephonella marina</i>          | GCA_000021565.1_ASM2156v1_genomic.fna   |
| 567 | <i>Simkania negevensis</i>           | GCA_000237205.1_ASM23720v1_genomic.fna  |
| 568 | <i>Sulfurihydrogenibium azorense</i> | GCA_000021545.1_ASM2154v1_genomic.fna   |
| 569 | <i>Erwinia amylovora</i>             | GCA_000091565.1_ASM9156v1_genomic.fna   |
| 570 | <i>Chlorobium limicola</i>           | GCA_000020465.1_ASM2046v1_genomic.fna   |
| 571 | <i>Chlorobium phaeovibrioides</i>    | GCA_000016085.1_ASM1608v1_genomic.fna   |
| 572 | <i>Halobacteriovorax marinus</i>     | GCA_000210915.2_ASM21091v2_genomic.fna  |
| 573 | <i>Proteus mirabilis</i>             | GCA_000069965.1_ASM6996v1_genomic.fna   |
| 574 | <i>Klebsiella oxytoca</i>            | GCA_001022195.1_ASM102219v1_genomic.fna |
| 575 | <i>Clostridium beijerinckii</i>      | GCA_000833105.2_ASM83310v2_genomic.fna  |

|     |                                           |                                        |
|-----|-------------------------------------------|----------------------------------------|
| 576 | <i>Cronobacter sakazakii</i>              | GCA_000982825.1_ASM98282v1_genomic.fna |
| 577 | <i>Citrobacter koseri</i>                 | GCA_000018045.1_ASM1804v1_genomic.fna  |
| 578 | <i>Rickettsia canadensis</i>              | GCA_000014345.1_ASM1434v1_genomic.fna  |
| 579 | <i>Rickettsia akari</i>                   | GCA_000018205.1_ASM1820v1_genomic.fna  |
| 580 | <i>Streptomyces scabiei</i>               | GCA_000091305.1_ASM9130v1_genomic.fna  |
| 581 | <i>Acaryochloris marina</i>               | GCA_000018105.1_ASM1810v1_genomic.fna  |
| 582 | <i>Pelodictyon phaeoclathratiforme</i>    | GCA_000020645.1_ASM2064v1_genomic.fna  |
| 583 | <i>Syntrophobacter fumaroxidans</i>       | GCA_000014965.1_ASM1496v1_genomic.fna  |
| 584 | <i>Syntrophomonas wolfei</i>              | GCA_000014725.1_ASM1472v1_genomic.fna  |
| 585 | <i>Hydrogenovibrio crunogenus</i>         | GCA_000012605.1_ASM1260v1_genomic.fna  |
| 586 | <i>Sulfurimonas denitrificans</i>         | GCA_000012965.1_ASM1296v1_genomic.fna  |
| 587 | <i>Prosthecochloris aestuarii</i>         | GCA_000020625.1_ASM2062v1_genomic.fna  |
| 588 | <i>Desulfotalea psychrophila</i>          | GCA_000025945.1_ASM2594v1_genomic.fna  |
| 589 | <i>Thiobacillus denitrificans</i>         | GCA_000012745.1_ASM1274v1_genomic.fna  |
| 590 | <i>Mannheimia succiniciproducens</i>      | GCA_000007745.1_ASM774v1_genomic.fna   |
| 591 | <i>Nocardia farcinica</i>                 | GCA_001182745.2_NCTC11134_genomic.fna  |
| 592 | <i>Eubacterium eligens</i>                | GCA_000146185.1_ASM14618v1_genomic.fna |
| 593 | <i>Photobacterium profundum</i>           | GCA_000196255.1_ASM19625v1_genomic.fna |
| 594 | <i>Marinobacter hydrocarbonoclasticus</i> | GCA_000284615.1_ASM28461v1_genomic.fna |
| 595 | <i>Nautilia profundicola</i>              | GCA_000021725.1_ASM2172v1_genomic.fna  |
| 596 | <i>Aromatoleum aromaticum</i>             | GCA_000025965.1_ASM2596v1_genomic.fna  |
| 597 | <i>Lactobacillus salivarius</i>           | GCA_000008925.1_ASM892v1_genomic.fna   |
| 598 | <i>Bacillus clausii</i>                   | GCA_000009825.1_ASM982v1_genomic.fna   |
| 599 | <i>Gluconobacter oxydans</i>              | GCA_000011685.1_ASM1168v1_genomic.fna  |
| 600 | <i>Pelobacter carbinolicus</i>            | GCA_000012885.1_ASM1288v1_genomic.fna  |
| 601 | <i>Wolbachia endosymbiont</i>             | GCA_000376585.1_ASM37658v1_genomic.fna |
| 602 | <i>Actinobacillus succinogenes</i>        | GCA_000017245.1_ASM1724v1_genomic.fna  |
| 603 | <i>Bacillus selenitireducens</i>          | GCA_000093085.1_ASM9308v1_genomic.fna  |
| 604 | <i>Agrobacterium vitis</i>                | GCA_000016285.1_ASM1628v1_genomic.fna  |
| 605 | <i>Enterobacter cloacae</i>               | GCA_000025565.1_ASM2556v1_genomic.fna  |
| 606 | <i>Bacteroides vulgatus</i>               | GCA_000012825.1_ASM1282v1_genomic.fna  |
| 607 | <i>Pelobacter propionicus</i>             | GCA_000015045.1_ASM1504v1_genomic.fna  |
| 608 | <i>Shewanella amazonensis</i>             | GCA_000015245.1_ASM1524v1_genomic.fna  |
| 609 | <i>Shewanella denitrificans</i>           | GCA_000013765.1_ASM1376v1_genomic.fna  |

|     |                                             |                                         |
|-----|---------------------------------------------|-----------------------------------------|
| 610 | <i>Shewanella frigidimarina</i>             | GCA_000014705.1_ASM1470v1_genomic.fna   |
| 611 | <i>Xenorhabdus bovienii</i>                 | GCA_000027225.1_ASM2722v1_genomic.fna   |
| 612 | <i>Xenorhabdus nematophila</i>              | GCA_000953355.1_XNC2_genomic.fna        |
| 613 | <i>Spiroplasma citri</i>                    | GCA_001886855.1_ASM188685v1_genomic.fna |
| 614 | <i>Moraxella catarrhalis</i>                | GCA_000092265.1_ASM9226v1_genomic.fna   |
| 615 | <i>Mycoplasma fermentans</i>                | GCA_000186005.1_ASM18600v1_genomic.fna  |
| 616 | <i>Polaromonas naphthalenivorans</i>        | GCA_000015505.1_ASM1550v1_genomic.fna   |
| 617 | <i>Citrobacter rodentium</i>                | GCA_000027085.1_ASM2708v1_genomic.fna   |
| 618 | <i>Desulfotomaculum reducens</i>            | GCA_000016165.1_ASM1616v1_genomic.fna   |
| 619 | <i>Helicobacter mustelae</i>                | GCA_000091985.1_ASM9198v1_genomic.fna   |
| 620 | <i>Heliobacterium modesticaldum</i>         | GCA_000019165.1_ASM1916v1_genomic.fna   |
| 621 | <i>Listeria ivanovii</i>                    | GCA_000252975.1_ASM25297v1_genomic.fna  |
| 622 | <i>Deinococcus geothermalis</i>             | GCA_000196275.1_ASM19627v1_genomic.fna  |
| 623 | <i>Listeria seeligeri</i>                   | GCA_000027145.1_ASM2714v1_genomic.fna   |
| 624 | <i>Listeria welshimeri</i>                  | GCA_000060285.1_ASM6028v1_genomic.fna   |
| 625 | <i>Pseudoalteromonas atlantica</i>          | GCA_000014225.1_ASM1422v1_genomic.fna   |
| 626 | <i>Roseiflexus castenholzii</i>             | GCA_000017805.1_ASM1780v1_genomic.fna   |
| 627 | <i>Caldicellulosiruptor saccharolyticus</i> | GCA_000016545.1_ASM1654v1_genomic.fna   |
| 628 | <i>Herminiimonas arsenicoxydans</i>         | GCA_000026125.1_ASM2612v1_genomic.fna   |
| 629 | <i>Edwardsiella ictaluri</i>                | GCA_000022885.2_ASM2288v2_genomic.fna   |
| 630 | <i>Neisseria lactamica</i>                  | GCA_000196295.1_ASM19629v1_genomic.fna  |
| 631 | <i>Nitrobacter hamburgensis</i>             | GCA_000013885.1_ASM1388v1_genomic.fna   |
| 632 | <i>Nitrobacter winogradskyi</i>             | GCA_000012725.1_ASM1272v1_genomic.fna   |
| 633 | <i>Aster yellows</i>                        | GCA_000012225.1_ASM1222v1_genomic.fna   |
| 634 | <i>Erythrobacter litoralis</i>              | GCA_000013005.1_ASM1300v1_genomic.fna   |
| 635 | <i>Parabacteroides distasonis</i>           | GCA_000012845.1_ASM1284v1_genomic.fna   |
| 636 | <i>Bifidobacterium breve</i>                | GCA_001025175.1_ASM102517v1_genomic.fna |
| 637 | <i>Psychroflexus torquis</i>                | GCA_000153485.2_ASM15348v2_genomic.fna  |
| 638 | <i>Clostridium ljungdahlii</i>              | GCA_000143685.1_ASM14368v1_genomic.fna  |
| 639 | <i>Bacillus mycoides</i>                    | GCA_000775975.1_ASM77597v1_genomic.fna  |
| 640 | <i>Croceibacter atlanticus</i>              | GCA_000196315.1_ASM19631v1_genomic.fna  |
| 641 | <i>Rhodococcus jostii</i>                   | GCA_000014565.1_ASM1456v1_genomic.fna   |
| 642 | <i>Rickettsia felis</i>                     | GCA_000012145.1_ASM1214v1_genomic.fna   |
| 643 | <i>Shewanella loihica</i>                   | GCA_000016065.1_ASM1606v1_genomic.fna   |

|     |                                          |                                         |
|-----|------------------------------------------|-----------------------------------------|
| 644 | <i>Sphingopyxis alaskensis</i>           | GCA_000013985.1_ASM1398v1_genomic.fna   |
| 645 | <i>Rhodoferrax ferrireducens</i>         | GCA_000013605.1_ASM1360v1_genomic.fna   |
| 646 | <i>Nitrospira multiformis</i>            | GCA_000196355.1_ASM19635v1_genomic.fna  |
| 647 | <i>Nitrosomonas eutropha</i>             | GCA_000014765.1_ASM1476v1_genomic.fna   |
| 648 | <i>Psychrobacter cryohalolentis</i>      | GCA_000013905.1_ASM1390v1_genomic.fna   |
| 649 | <i>Chlorobium chlorochromatii</i>        | GCA_000012585.1_ASM1258v1_genomic.fna   |
| 650 | <i>Streptococcus sanguinis</i>           | GCA_000014205.1_ASM1420v1_genomic.fna   |
| 651 | <i>Staphylococcus saprophyticus</i>      | GCA_000010125.1_ASM1012v1_genomic.fna   |
| 652 | <i>Pseudothermotoga lettingae</i>        | GCA_000017865.1_ASM1786v1_genomic.fna   |
| 653 | <i>Stigmatella aurantiaca</i>            | GCA_000165485.1_ASM16548v1_genomic.fna  |
| 654 | <i>Bacillus coagulans</i>                | GCA_000832905.1_ASM83290v1_genomic.fna  |
| 655 | <i>Mycobacterium abscessus</i>           | GCA_000069185.1_ASM6918v1_genomic.fna   |
| 656 | <i>Desulfovibrio magneticus</i>          | GCA_000010665.1_ASM1066v1_genomic.fna   |
| 657 | <i>Herbaspirillum seropedicae</i>        | GCA_001040945.1_ASM104094v1_genomic.fna |
| 658 | <i>Alkalilimnicola ehrlichii</i>         | GCA_000014785.1_ASM1478v1_genomic.fna   |
| 659 | <i>Mycobacterium vanbaalenii</i>         | GCA_000015305.1_ASM1530v1_genomic.fna   |
| 660 | <i>Halorhodospira halophila</i>          | GCA_000015585.1_ASM1558v1_genomic.fna   |
| 661 | <i>Geobacter uraniireducens</i>          | GCA_000016745.1_ASM1674v1_genomic.fna   |
| 662 | <i>Acidiphilium cryptum</i>              | GCA_000016725.1_ASM1672v1_genomic.fna   |
| 663 | <i>Hahella chejuensis</i>                | GCA_000012985.1_ASM1298v1_genomic.fna   |
| 664 | <i>Shewanella violacea</i>               | GCA_000091325.1_ASM9132v1_genomic.fna   |
| 665 | <i>Xanthobacter autotrophicus</i>        | GCA_000017645.1_ASM1764v1_genomic.fna   |
| 666 | <i>Paenibacillus polymyxa</i>            | GCA_000164985.2_ASM16498v2_genomic.fna  |
| 667 | <i>Leuconostoc citreum</i>               | GCA_000026405.1_ASM2640v1_genomic.fna   |
| 668 | <i>Alkaliphilus oremlandii</i>           | GCA_000018325.1_ASM1832v1_genomic.fna   |
| 669 | <i>Flavobacterium johnsoniae</i>         | GCA_000016645.1_ASM1664v1_genomic.fna   |
| 670 | <i>Collimonas fungivorans</i>            | GCA_000221045.1_ASM22104v1_genomic.fna  |
| 671 | <i>Legionella longbeachae</i>            | GCA_000091785.1_ASM9178v1_genomic.fna   |
| 672 | <i>Acidothermus cellulolyticus</i>       | GCA_000015025.1_ASM1502v1_genomic.fna   |
| 673 | <i>Zobellia galactanivorans</i>          | GCA_000973105.1_ASM97310v1_genomic.fna  |
| 674 | <i>Yersinia intermedia</i>               | GCA_000834515.1_ASM83451v1_genomic.fna  |
| 675 | <i>Salinibacter ruber</i>                | GCA_000013045.1_ASM1304v1_genomic.fna   |
| 676 | <i>Lachnoclostridium phytofermentans</i> | GCA_000018685.1_ASM1868v1_genomic.fna   |
| 677 | <i>Psychromonas ingrahamii</i>           | GCA_000015285.1_ASM1528v1_genomic.fna   |

|     |                                         |                                         |
|-----|-----------------------------------------|-----------------------------------------|
| 678 | <i>Syntrophus aciditrophicus</i>        | GCA_000013405.1_ASM1340v1_genomic.fna   |
| 679 | <i>Ramlibacter tataouinensis</i>        | GCA_000215705.1_ASM21570v1_genomic.fna  |
| 680 | <i>Polynucleobacter necessarius</i>     | GCA_000019745.1_ASM1974v1_genomic.fna   |
| 681 | <i>Deinococcus deserti</i>              | GCA_000020685.1_ASM2068v1_genomic.fna   |
| 682 | <i>Burkholderia dolosa</i>              | GCA_000959505.1_ASM95950v1_genomic.fna  |
| 683 | <i>Herpetosiphon aurantiacus</i>        | GCA_000018565.1_ASM1856v1_genomic.fna   |
| 684 | <i>Halothermothrix orenii</i>           | GCA_000020485.1_ASM2048v1_genomic.fna   |
| 685 | <i>Sinorhizobium medicae</i>            | GCA_000017145.1_ASM1714v1_genomic.fna   |
| 686 | <i>Aeromonas hydrophila</i>             | GCA_000014805.1_ASM1480v1_genomic.fna   |
| 687 | <i>Propionibacterium freudenreichii</i> | GCA_000940845.1_ASM94084v1_genomic.fna  |
| 688 | <i>Chloroflexus aggregans</i>           | GCA_000021945.1_ASM2194v1_genomic.fna   |
| 689 | <i>Fervidobacterium nodosum</i>         | GCA_000017545.1_ASM1754v1_genomic.fna   |
| 690 | <i>Pseudomonas entomophila</i>          | GCA_000026105.1_ASM2610v1_genomic.fna   |
| 691 | <i>Pseudomonas stutzeri</i>             | GCA_000590475.1_ASM59047v1_genomic.fna  |
| 692 | <i>Clostridium novyi</i>                | GCA_000014125.1_ASM1412v1_genomic.fna   |
| 693 | <i>Thermotoga petrophila</i>            | GCA_000016785.1_ASM1678v1_genomic.fna   |
| 694 | <i>Streptococcus iniae</i>              | GCA_000831485.1_ASM83148v1_genomic.fna  |
| 695 | <i>Granulibacter bethesdensis</i>       | GCA_000014285.2_ASM1428v2_genomic.fna   |
| 696 | <i>Campylobacter concisus</i>           | GCA_001298465.1_ASM129846v1_genomic.fna |
| 697 | <i>Campylobacter curvus</i>             | GCA_000017465.2_ASM1746v2_genomic.fna   |
| 698 | <i>Verminephrobacter eiseniae</i>       | GCA_000015565.1_ASM1556v1_genomic.fna   |
| 699 | <i>Thermosipho melanesiensis</i>        | GCA_000016905.1_ASM1690v1_genomic.fna   |
| 700 | <i>Sphingomonas wittichii</i>           | GCA_000016765.1_ASM1676v1_genomic.fna   |
| 701 | <i>Frankia alni</i>                     | GCA_000058485.1_ASM5848v1_genomic.fna   |
| 702 | <i>Paraburkholderia phymatum</i>        | GCA_000020045.1_ASM2004v1_genomic.fna   |
| 703 | <i>Shewanella pealeana</i>              | GCA_000018285.1_ASM1828v1_genomic.fna   |
| 704 | <i>Dinoroseobacter shibae</i>           | GCA_000018145.1_ASM1814v1_genomic.fna   |
| 705 | <i>Clostridium cellulolyticum</i>       | GCA_000022065.1_ASM2206v1_genomic.fna   |
| 706 | <i>Geobacter lovleyi</i>                | GCA_000020385.1_ASM2038v1_genomic.fna   |
| 707 | <i>Shewanella woodyi</i>                | GCA_000019525.1_ASM1952v1_genomic.fna   |
| 708 | <i>Helicobacter acinonychis</i>         | GCA_000009305.1_ASM930v1_genomic.fna    |
| 709 | <i>Maricaulis maris</i>                 | GCA_000014745.1_ASM1474v1_genomic.fna   |
| 710 | <i>Pseudomonas mendocina</i>            | GCA_000016565.1_ASM1656v1_genomic.fna   |
| 711 | <i>Serratia proteamaculans</i>          | GCA_000018085.1_ASM1808v1_genomic.fna   |

|     |                                         |                                         |
|-----|-----------------------------------------|-----------------------------------------|
| 712 | <i>Petroglossus mobilis</i>             | GCA_000018605.1_ASM1860v1_genomic.fna   |
| 713 | <i>Geobacter bemidjiensis</i>           | GCA_000020725.1_ASM2072v1_genomic.fna   |
| 714 | <i>Paraburkholderia phytofirmans</i>    | GCA_000020125.1_ASM2012v1_genomic.fna   |
| 715 | <i>Parvibaculum lavamentivorans</i>     | GCA_000017565.1_ASM1756v1_genomic.fna   |
| 716 | <i>Shewanella piezotolerans</i>         | GCA_000014885.1_ASM1488v1_genomic.fna   |
| 717 | <i>Desulfococcus oleovorans</i>         | GCA_000018405.1_ASM1840v1_genomic.fna   |
| 718 | <i>Borrelia duttonii</i>                | GCA_000019685.1_ASM1968v1_genomic.fna   |
| 719 | <i>Borrelia recurrentis</i>             | GCA_000019705.1_ASM1970v1_genomic.fna   |
| 720 | <i>Rickettsia africae</i>               | GCA_000023005.1_ASM2300v1_genomic.fna   |
| 721 | <i>Rickettsia massiliae</i>             | GCA_000016625.1_ASM1662v1_genomic.fna   |
| 722 | <i>Rhodospirillum centenum</i>          | GCA_000016185.1_ASM1618v1_genomic.fna   |
| 723 | <i>Labrenzia aggregata</i>              | GCA_001999245.1_ASM199924v1_genomic.fna |
| 724 | <i>Geobacillus thermodenitrificans</i>  | GCA_000015745.1_ASM1574v1_genomic.fna   |
| 725 | <i>Shewanella sediminis</i>             | GCA_000018025.1_ASM1802v1_genomic.fna   |
| 726 | <i>Fingoldia magna</i>                  | GCA_000010185.1_ASM1018v1_genomic.fna   |
| 727 | <i>Burkholderia ubonensis</i>           | GCA_000959245.1_ASM95924v1_genomic.fna  |
| 728 | <i>Pelotomaculum thermopropionicum</i>  | GCA_000010565.1_ASM1056v1_genomic.fna   |
| 729 | <i>Magnetospirillum gryphiswaldense</i> | GCA_000513295.1_MGMSRv2_genomic.fna     |
| 730 | <i>Neorickettsia risticii</i>           | GCA_000022525.1_ASM2252v1_genomic.fna   |
| 731 | <i>Renibacterium salmoninarum</i>       | GCA_000018885.1_ASM1888v1_genomic.fna   |
| 732 | <i>Acholeplasma laidlawii</i>           | GCA_000018785.1_ASM1878v1_genomic.fna   |
| 733 | <i>Azorhizobium caulinodans</i>         | GCA_000010525.1_ASM1052v1_genomic.fna   |
| 734 | <i>Caldanaerobacter subterraneus</i>    | GCA_000007085.1_ASM708v1_genomic.fna    |
| 735 | <i>Marinitoga piezophila</i>            | GCA_000255135.1_ASM25513v1_genomic.fna  |
| 736 | <i>Roseobacter litoralis</i>            | GCA_000154785.2_ASM15478v2_genomic.fna  |
| 737 | <i>Vibrio shilonii</i>                  | GCA_002214345.1_ASM221434v1_genomic.fna |
| 738 | <i>Methylobacterium populi</i>          | GCA_000019945.1_ASM1994v1_genomic.fna   |
| 739 | <i>Desulfatibacillum alkenivorans</i>   | GCA_000021905.1_ASM2190v1_genomic.fna   |
| 740 | <i>Lysinibacillus sphaericus</i>        | GCA_001753205.1_ASM175320v1_genomic.fna |
| 741 | <i>Elusimicrobium minutum</i>           | GCA_000020145.1_ASM2014v1_genomic.fna   |
| 742 | <i>Borrelia valaisiana</i>              | GCA_000739475.1_ASM73947v1_genomic.fna  |
| 743 | <i>Phenylobacterium zucineum</i>        | GCA_000017265.1_ASM1726v1_genomic.fna   |
| 744 | <i>Flavobacterium psychrophilum</i>     | GCA_000064305.2_ASM6430v2_genomic.fna   |
| 745 | <i>Opitutus terrae</i>                  | GCA_000019965.1_ASM1996v1_genomic.fna   |

|     |                                             |                                         |
|-----|---------------------------------------------|-----------------------------------------|
| 746 | <i>Pseudarthrobacter chlorophenicus</i>     | GCA_000022025.1_ASM2202v1_genomic.fna   |
| 747 | <i>Clostridium butyricum</i>                | GCA_001456065.2_ASM145606v2_genomic.fna |
| 748 | <i>Leptothrix cholodnii</i>                 | GCA_000019785.1_ASM1978v1_genomic.fna   |
| 749 | <i>Campylobacter hominis</i>                | GCA_000017585.1_ASM1758v1_genomic.fna   |
| 750 | <i>Pseudarthrobacter phenanthrenivorans</i> | GCA_000189535.1_ASM18953v1_genomic.fna  |
| 751 | <i>Akkermansia muciniphila</i>              | GCA_000020225.1_ASM2022v1_genomic.fna   |
| 752 | <i>Mycobacterium liflandii</i>              | GCA_000026445.2_ASM2644v2_genomic.fna   |
| 753 | <i>Shewanella halifaxensis</i>              | GCA_000019185.1_ASM1918v1_genomic.fna   |
| 754 | <i>Methylobacterium nodulans</i>            | GCA_000022085.1_ASM2208v1_genomic.fna   |
| 755 | <i>Erwinia tasmaniensis</i>                 | GCA_000026185.1_ASM2618v1_genomic.fna   |
| 756 | <i>Methylocella silvestris</i>              | GCA_000021745.1_ASM2174v1_genomic.fna   |
| 757 | <i>Beijerinckia indica</i>                  | GCA_000019845.1_ASM1984v1_genomic.fna   |
| 758 | <i>Desulfobacterium autotrophicum</i>       | GCA_000020365.1_ASM2036v1_genomic.fna   |
| 759 | <i>Gemmatimonas aurantiaca</i>              | GCA_000010305.1_ASM1030v1_genomic.fna   |
| 760 | <i>Natranaerobius thermophilus</i>          | GCA_000020005.1_ASM2000v1_genomic.fna   |
| 761 | <i>Macrococcus caseolyticus</i>             | GCA_000010585.1_ASM1058v1_genomic.fna   |
| 762 | <i>Rhodococcus erythropolis</i>             | GCA_000454045.1_ASM45404v1_genomic.fna  |
| 763 | <i>Psychrobacter arcticus</i>               | GCA_000012305.1_ASM1230v1_genomic.fna   |
| 764 | <i>Dechloromonas aromatica</i>              | GCA_000012425.1_ASM1242v1_genomic.fna   |
| 765 | <i>Bdellovibrio bacteriovorus</i>           | GCA_000525675.1_ASM52567v1_genomic.fna  |
| 766 | <i>Lactobacillus johnsonii</i>              | GCA_000008065.1_ASM806v1_genomic.fna    |
| 767 | <i>Prevotella ruminicola</i>                | GCA_000025925.1_ASM2592v1_genomic.fna   |
| 768 | <i>Mycoplasma synoviae</i>                  | GCA_000969765.1_ASM96976v1_genomic.fna  |
| 769 | <i>Idiomarina loihiensis</i>                | GCA_000008465.1_ASM846v1_genomic.fna    |
| 770 | <i>Ammonifex degensii</i>                   | GCA_000024605.1_ASM2460v1_genomic.fna   |
| 771 | <i>Symbiobacterium thermophilum</i>         | GCA_000009905.1_ASM990v1_genomic.fna    |
| 772 | <i>Rickettsia typhi</i>                     | GCA_000008045.1_ASM804v1_genomic.fna    |
| 773 | <i>Mycoplasma mobile</i>                    | GCA_000008365.1_ASM836v1_genomic.fna    |
| 774 | <i>Alcanivorax borkumensis</i>              | GCA_000009365.1_ASM936v1_genomic.fna    |
| 775 | <i>Alkaliphilus metalliredigens</i>         | GCA_000016985.1_ASM1698v1_genomic.fna   |
| 776 | <i>Chlorobium luteolum</i>                  | GCA_000012485.1_ASM1248v1_genomic.fna   |
| 777 | <i>Paracoccus denitrificans</i>             | GCA_000203895.1_ASM20389v1_genomic.fna  |
| 778 | <i>Geobacillus kaustophilus</i>             | GCA_000009785.1_ASM978v1_genomic.fna    |
| 779 | <i>Mycoplasma haemofelis</i>                | GCA_000186985.3_ASM18698v3_genomic.fna  |

|     |                                       |                                         |
|-----|---------------------------------------|-----------------------------------------|
| 780 | <i>Lactobacillus sakei</i>            | GCA_002224565.1_ASM222456v1_genomic.fna |
| 781 | <i>Loktanella vestfoldensis</i>       | GCA_002158905.1_ASM215890v1_genomic.fna |
| 782 | <i>Robiginitalea biformata</i>        | GCA_000024125.1_ASM2412v1_genomic.fna   |
| 783 | <i>Paenibacillus larvae</i>           | GCA_002003265.1_ASM200326v1_genomic.fna |
| 784 | <i>Dokdonia donghaensis</i>           | GCA_001653755.1_ASM165375v1_genomic.fna |
| 785 | <i>Borrelia turicatae</i>             | GCA_000012085.2_ASM1208v2_genomic.fna   |
| 786 | <i>Acidovorax avenae</i>              | GCA_000176855.2_ASM17685v2_genomic.fna  |
| 787 | <i>Parvularcula bermudensis</i>       | GCA_000152825.2_ASM15282v2_genomic.fna  |
| 788 | <i>Hyphomonas neptunium</i>           | GCA_000013025.1_ASM1302v1_genomic.fna   |
| 789 | <i>Pseudoalteromonas haloplanktis</i> | GCA_000026085.1_ASM2608v1_genomic.fna   |
| 790 | <i>Arcobacter butzleri</i>            | GCA_000014025.1_ASM1402v1_genomic.fna   |
| 791 | <i>Xanthomonas albilineans</i>        | GCA_000087965.1_ASM8796v1_genomic.fna   |
| 792 | <i>Mycoplasma leachii</i>             | GCA_000183365.1_ASM18336v1_genomic.fna  |
| 793 | <i>Thermosiphon africanus</i>         | GCA_000021285.1_ASM2128v1_genomic.fna   |
| 794 | <i>Kocuria rhizophila</i>             | GCA_000010285.1_ASM1028v1_genomic.fna   |
| 795 | <i>Myxococcus fulvus</i>              | GCA_000219105.1_ASM21910v1_genomic.fna  |
| 796 | <i>Mycobacterium intracellulare</i>   | GCA_000277125.1_ASM27712v1_genomic.fna  |
| 797 | <i>Sorangium cellulosum</i>           | GCA_000067165.1_ASM6716v1_genomic.fna   |
| 798 | <i>Bordetella petrii</i>              | GCA_000067205.1_ASM6720v1_genomic.fna   |
| 799 | <i>Cellvibrio japonicus</i>           | GCA_000019225.1_ASM1922v1_genomic.fna   |
| 800 | <i>Mycobacterium gilvum</i>           | GCA_000184435.1_ASM18443v1_genomic.fna  |
| 801 | <i>Edwardsiella tarda</i>             | GCA_000020865.1_ASM2086v1_genomic.fna   |
| 802 | <i>Anoxybacillus flavithermus</i>     | GCA_000019045.1_ASM1904v1_genomic.fna   |
| 803 | <i>Streptomyces pristinaespiralis</i> | GCA_001278075.1_ASM127807v1_genomic.fna |
| 804 | <i>Acetoanaerobium sticklandii</i>    | GCA_000196455.1_ASM19645v1_genomic.fna  |
| 805 | <i>Thermus aquaticus</i>              | GCA_001399775.1_ASM139977v1_genomic.fna |
| 806 | <i>Oligotropha carboxidovorans</i>    | GCA_000218565.1_ASM21856v1_genomic.fna  |
| 807 | <i>Escherichia albertii</i>           | GCA_000512125.1_ASM51212v1_genomic.fna  |
| 808 | <i>Bacillus pseudofirmus</i>          | GCA_000005825.2_ASM582v2_genomic.fna    |
| 809 | <i>Methylobacillus infernalis</i>     | GCA_000019665.1_ASM1966v1_genomic.fna   |
| 810 | <i>Lactobacillus buchneri</i>         | GCA_000298115.2_ASM29811v2_genomic.fna  |
| 811 | <i>Mycoplasma crocodyli</i>           | GCA_000025845.1_ASM2584v1_genomic.fna   |
| 812 | <i>Eubacterium rectale</i>            | GCA_000020605.1_ASM2060v1_genomic.fna   |
| 813 | <i>Brevibacillus brevis</i>           | GCA_000010165.1_ASM1016v1_genomic.fna   |



|     |                                         |                                         |
|-----|-----------------------------------------|-----------------------------------------|
| 814 | <i>Thioalkalivibrio sulfidiphilus</i>   | GCA_000021985.1_ASM2198v1_genomic.fna   |
| 815 | <i>Corynebacterium urealyticum</i>      | GCA_000069945.1_ASM6994v1_genomic.fna   |
| 816 | <i>Dictyoglomus turgidum</i>            | GCA_000021645.1_ASM2164v1_genomic.fna   |
| 817 | <i>Chlorobaculum parvum</i>             | GCA_000020505.1_ASM2050v1_genomic.fna   |
| 818 | <i>Chloroherpeton thalassium</i>        | GCA_000020525.1_ASM2052v1_genomic.fna   |
| 819 | <i>Caldicellulosiruptor bescii</i>      | GCA_000022325.1_ASM2232v1_genomic.fna   |
| 820 | <i>Borrelia hermsii</i>                 | GCA_001660005.1_ASM166000v1_genomic.fna |
| 821 | <i>Kosmotoga olearia</i>                | GCA_000023325.1_ASM2332v1_genomic.fna   |
| 822 | <i>Clostridium carboxidivorans</i>      | GCA_001038625.1_ASM103862v1_genomic.fna |
| 823 | <i>Desulfovibrio salexigens</i>         | GCA_000023445.1_ASM2344v1_genomic.fna   |
| 824 | <i>Yersinia aldovae</i>                 | GCA_000834395.1_ASM83439v1_genomic.fna  |
| 825 | <i>Yersinia rohdei</i>                  | GCA_000834455.1_ASM83445v1_genomic.fna  |
| 826 | <i>Yersinia ruckeri</i>                 | GCA_000964565.1_ASM96456v1_genomic.fna  |
| 827 | <i>Pirellula staleyi</i>                | GCA_000025185.1_ASM2518v1_genomic.fna   |
| 828 | <i>Acidovorax ebreus</i>                | GCA_000022305.1_ASM2230v1_genomic.fna   |
| 829 | <i>Treponema primitia</i>               | GCA_000214375.1_ASM21437v1_genomic.fna  |
| 830 | <i>Treponema azotonutricium</i>         | GCA_000214355.1_ASM21435v1_genomic.fna  |
| 831 | <i>Alicyclobacillus acidocaldarius</i>  | GCA_000024285.1_ASM2428v1_genomic.fna   |
| 832 | <i>Rhodococcus opacus</i>               | GCA_000010805.1_ASM1080v1_genomic.fna   |
| 833 | <i>Variovorax paradoxus</i>             | GCA_000184745.1_ASM18474v1_genomic.fna  |
| 834 | <i>Photorhabdus asymbiotica</i>         | GCA_000196475.1_ASM19647v1_genomic.fna  |
| 835 | <i>Aliivibrio salmonicida</i>           | GCA_000196495.1_ASM19649v1_genomic.fna  |
| 836 | <i>Coprothermobacter proteolyticus</i>  | GCA_000020945.1_ASM2094v1_genomic.fna   |
| 837 | <i>Dictyoglomus thermophilum</i>        | GCA_000020965.1_ASM2096v1_genomic.fna   |
| 838 | <i>Thermodesulfovibrio yellowstonii</i> | GCA_000020985.1_ASM2098v1_genomic.fna   |
| 839 | <i>Laribacter hongkongensis</i>         | GCA_000021025.1_ASM2102v1_genomic.fna   |
| 840 | <i>Treponema paraluis-cuniculi</i>      | GCA_000217655.1_ASM21765v1_genomic.fna  |
| 841 | <i>Teredinibacter turnerae</i>          | GCA_000023025.1_ASM2302v1_genomic.fna   |
| 842 | <i>Mycobacterium kansasii</i>           | GCA_000157895.2_ASM15789v2_genomic.fna  |
| 843 | <i>Ferrimonas balearica</i>             | GCA_000148645.1_ASM14864v1_genomic.fna  |
| 844 | ' <i>Nostoc azollae</i> '               | GCA_000196515.1_ASM19651v1_genomic.fna  |
| 845 | <i>Thermosediminibacter oceani</i>      | GCA_000144645.1_ASM14464v1_genomic.fna  |
| 846 | <i>Halothiobacillus neapolitanus</i>    | GCA_000024765.1_ASM2476v1_genomic.fna   |
| 847 | <i>Pectobacterium carotovorum</i>       | GCA_000023605.1_ASM2360v1_genomic.fna   |

|     |                                                    |                                         |
|-----|----------------------------------------------------|-----------------------------------------|
| 848 | <i>Brachyspira hyodysenteriae</i>                  | GCA_001676785.2_ASM167678v2_genomic.fna |
| 849 | <i>Pectobacterium wasabiae</i>                     | GCA_001742185.1_ASM174218v1_genomic.fna |
| 850 | <i>Bacillus vallismortis</i>                       | GCA_002113805.1_ASM211380v1_genomic.fna |
| 851 | <i>Rickettsia peacockii</i>                        | GCA_000021525.1_ASM2152v1_genomic.fna   |
| 852 | <i>Kyrpidia tusciae</i>                            | GCA_000092905.1_ASM9290v1_genomic.fna   |
| 853 | <i>Sulfurimonas autotrophica</i>                   | GCA_000147355.1_ASM14735v1_genomic.fna  |
| 854 | <i>Rothia mucilaginosa</i>                         | GCA_000011025.1_ASM1102v1_genomic.fna   |
| 855 | <i>Dickeya zeae</i>                                | GCA_000025065.1_ASM2506v1_genomic.fna   |
| 856 | <i>Aggregatibacter actinomycetemcomitans</i>       | GCA_001594265.1_ASM159426v1_genomic.fna |
| 857 | <i>Allochromatium vinosum</i>                      | GCA_000025485.1_ASM2548v1_genomic.fna   |
| 858 | <i>Ilyobacter polytropus</i>                       | GCA_000165505.1_ASM16550v1_genomic.fna  |
| 859 | <i>Thermoanaerobacter brockii</i>                  | GCA_000175295.2_ASM17529v2_genomic.fna  |
| 860 | <i>Aminobacterium colombiense</i>                  | GCA_000025885.1_ASM2588v1_genomic.fna   |
| 861 | <i>Brucella microti</i>                            | GCA_000022745.1_ASM2274v1_genomic.fna   |
| 862 | <i>Halanaerobium praevalens</i>                    | GCA_000165465.1_ASM16546v1_genomic.fna  |
| 863 | <i>Arcobacter nitrofigilis</i>                     | GCA_000092245.1_ASM9224v1_genomic.fna   |
| 864 | <i>Asticcacaulis excentricus</i>                   | GCA_000175215.2_ASM17521v2_genomic.fna  |
| 865 | <i>Sediminispirochaeta smaragdinae</i>             | GCA_000143985.1_ASM14398v1_genomic.fna  |
| 866 | <i>Anaplasma centrale</i>                          | GCA_000024505.1_ASM2450v1_genomic.fna   |
| 867 | <i>Acetohalobium arabaticum</i>                    | GCA_000144695.1_ASM14469v1_genomic.fna  |
| 868 | <i>Isosphaera pallida</i>                          | GCA_000186345.1_ASM18634v1_genomic.fna  |
| 869 | <i>Gallionella capsiferiformans</i>                | GCA_000145255.1_ASM14525v1_genomic.fna  |
| 870 | <i>Desulfobulbus propionicus</i>                   | GCA_000186885.1_ASM18688v1_genomic.fna  |
| 871 | <i>Thermoanaerobacter italicus</i>                 | GCA_000025645.1_ASM2564v1_genomic.fna   |
| 872 | <i>Sideroxydans lithotrophicus</i>                 | GCA_000025705.1_ASM2570v1_genomic.fna   |
| 873 | <i>Thermoanaerobacterium thermosaccharolyticum</i> | GCA_000145615.1_ASM14561v1_genomic.fna  |
| 874 | <i>Clostridium cellulovorans</i>                   | GCA_000145275.1_ASM14527v1_genomic.fna  |
| 875 | <i>Hirschia baltica</i>                            | GCA_000023785.1_ASM2378v1_genomic.fna   |
| 876 | <i>Methylovorus glucosetrophus</i>                 | GCA_000023745.1_ASM2374v1_genomic.fna   |
| 877 | <i>Hyphomicrobium denitrificans</i>                | GCA_000143145.1_ASM14314v1_genomic.fna  |
| 878 | <i>Thermoanaerobacter mathranii</i>                | GCA_000092965.1_ASM9296v1_genomic.fna   |
| 879 | <i>Coralimargarita akajimensis</i>                 | GCA_000025905.1_ASM2590v1_genomic.fna   |
| 880 | <i>Escherichia fergusonii</i>                      | GCA_000026225.1_ASM2622v1_genomic.fna   |
| 881 | <i>Streptococcus intermedius</i>                   | GCA_000463355.1_ASM46335v1_genomic.fna  |

|     |                                          |                                         |
|-----|------------------------------------------|-----------------------------------------|
| 882 | <i>Streptomyces lividans</i>             | GCA_000739105.1_ASM73910v1_genomic.fna  |
| 883 | <i>Streptomyces hygroscopicus</i>        | GCA_000245355.1_ASM24535v1_genomic.fna  |
| 884 | <i>Desulfurivibrio alkaliphilus</i>      | GCA_000092205.1_ASM9220v1_genomic.fna   |
| 885 | <i>Thiomonas intermedia</i>              | GCA_002028405.1_ASM202840v1_genomic.fna |
| 886 | <i>Thermotoga naphthophila</i>           | GCA_000025105.1_ASM2510v1_genomic.fna   |
| 887 | <i>Cellulomonas fimi</i>                 | GCA_000212695.1_ASM21269v1_genomic.fna  |
| 888 | <i>Cellulomonas gilvus</i>               | GCA_000218545.1_ASM21854v1_genomic.fna  |
| 889 | <i>Mesorhizobium opportunistum</i>       | GCA_000176035.2_ASM17603v2_genomic.fna  |
| 890 | <i>Tolomonas auensis</i>                 | GCA_000023065.1_ASM2306v1_genomic.fna   |
| 891 | <i>Hydrogenobacter thermophilus</i>      | GCA_000010785.1_ASM1078v1_genomic.fna   |
| 892 | <i>Acidaminococcus fermentans</i>        | GCA_000025305.1_ASM2530v1_genomic.fna   |
| 893 | <i>Erwinia pyrifoliae</i>                | GCA_000027265.1_ASM2726v1_genomic.fna   |
| 894 | <i>Erwinia billingiae</i>                | GCA_000196615.1_ASM19661v1_genomic.fna  |
| 895 | <i>Bartonella grahamii</i>               | GCA_000022725.1_ASM2272v1_genomic.fna   |
| 896 | <i>Staphylococcus carnosus</i>           | GCA_000009405.1_ASM940v1_genomic.fna    |
| 897 | <i>Mycoplasma hyorhinis</i>              | GCA_000313635.1_ASM31363v1_genomic.fna  |
| 898 | <i>Acidithiobacillus caldus</i>          | GCA_000175575.2_ASM17557v2_genomic.fna  |
| 899 | <i>Aggregatibacter aphrophilus</i>       | GCA_000022985.1_ASM2298v1_genomic.fna   |
| 900 | <i>Nitrosococcus halophilus</i>          | GCA_000024725.1_ASM2472v1_genomic.fna   |
| 901 | <i>Olsenella uli</i>                     | GCA_000143845.1_ASM14384v1_genomic.fna  |
| 902 | <i>Thermocrinis albus</i>                | GCA_000025605.1_ASM2560v1_genomic.fna   |
| 903 | <i>Caulobacter segnis</i>                | GCA_000092285.1_ASM9228v1_genomic.fna   |
| 904 | <i>Brevundimonas subvibrioides</i>       | GCA_000144605.1_ASM14460v1_genomic.fna  |
| 905 | <i>Bacteroides dorei</i>                 | GCA_001640865.1_ASM164086v1_genomic.fna |
| 906 | <i>Lactobacillus ruminis</i>             | GCA_000224985.1_ASM22498v1_genomic.fna  |
| 907 | <i>Lactobacillus jensenii</i>            | GCA_001936235.1_ASM193623v1_genomic.fna |
| 908 | <i>Gardnerella vaginalis</i>             | GCA_000025205.1_ASM2520v1_genomic.fna   |
| 909 | <i>Prevotella melaninogenica</i>         | GCA_000144405.1_ASM14440v1_genomic.fna  |
| 910 | <i>Rothia dentocariosa</i>               | GCA_000164695.2_ASM16469v2_genomic.fna  |
| 911 | <i>Bifidobacterium angulatum</i>         | GCA_001025155.1_ASM102515v1_genomic.fna |
| 912 | <i>Providencia rettgeri</i>              | GCA_001874625.1_ASM187462v1_genomic.fna |
| 913 | <i>Bifidobacterium pseudocatenulatum</i> | GCA_001025215.1_ASM102521v1_genomic.fna |
| 914 | <i>Neisseria elongata</i>                | GCA_000818035.1_ASM81803v1_genomic.fna  |
| 915 | <i>Neisseria sicca</i>                   | GCA_002073715.1_ASM207371v1_genomic.fna |

|     |                                        |                                         |
|-----|----------------------------------------|-----------------------------------------|
| 916 | <i>Filifactor alocis</i>               | GCA_000163895.2_ASM16389v2_genomic.fna  |
| 917 | <i>Capnocytophaga sputigena</i>        | GCA_002302395.1_ASM230239v1_genomic.fna |
| 918 | <i>Lactobacillus paracasei</i>         | GCA_000014525.1_ASM1452v1_genomic.fna   |
| 919 | <i>Mobiluncus curtisii</i>             | GCA_000196535.1_ASM19653v1_genomic.fna  |
| 920 | <i>Bacteroides cellulosilyticus</i>    | GCA_001318345.1_ASM131834v1_genomic.fna |
| 921 | <i>Helicobacter cinaedi</i>            | GCA_000349975.1_ASM34997v1_genomic.fna  |
| 922 | <i>Staphylococcus capitis</i>          | GCA_001028645.1_ASM102864v1_genomic.fna |
| 923 | <i>Campylobacter gracilis</i>          | GCA_001190745.1_ASM119074v1_genomic.fna |
| 924 | <i>Selenomonas sputigena</i>           | GCA_000208405.1_ASM20840v1_genomic.fna  |
| 925 | <i>Staphylococcus warneri</i>          | GCA_000332735.1_ASM33273v1_genomic.fna  |
| 926 | <i>Corynebacterium striatum</i>        | GCA_002156805.1_ASM215680v1_genomic.fna |
| 927 | <i>Corynebacterium aurimucosum</i>     | GCA_000022905.1_ASM2290v1_genomic.fna   |
| 928 | <i>Bifidobacterium catenulatum</i>     | GCA_001025195.1_ASM102519v1_genomic.fna |
| 929 | <i>Fusobacterium varium</i>            | GCA_002356455.1_ASM235645v1_genomic.fna |
| 930 | <i>Rhodococcus hoagii</i>              | GCA_000196695.1_ASM19669v1_genomic.fna  |
| 931 | <i>Helicobacter bilis</i>              | GCA_001999985.1_ASM199998v1_genomic.fna |
| 932 | <i>Erysipelothrix rhusiopathiae</i>    | GCA_000270085.1_ASM27008v1_genomic.fna  |
| 933 | <i>Lactobacillus amylolyticus</i>      | GCA_002075105.1_ASM207510v1_genomic.fna |
| 934 | <i>Starkeya novella</i>                | GCA_000092925.1_ASM9292v1_genomic.fna   |
| 935 | <i>Klebsiella variicola</i>            | GCA_000025465.1_ASM2546v1_genomic.fna   |
| 936 | <i>Bacillus atrophaeus</i>             | GCA_002173495.1_ASM217349v1_genomic.fna |
| 937 | <i>Segniliparus rotundus</i>           | GCA_000092825.1_ASM9282v1_genomic.fna   |
| 938 | <i>Desulfovibrio desulfuricans</i>     | GCA_000189295.2_ASM18929v2_genomic.fna  |
| 939 | <i>Syntrophothermus lipocalidus</i>    | GCA_000092405.1_ASM9240v1_genomic.fna   |
| 940 | <i>Marivirga tractuosa</i>             | GCA_000183425.1_ASM18342v1_genomic.fna  |
| 941 | <i>Arcanobacterium haemolyticum</i>    | GCA_000092365.1_ASM9236v1_genomic.fna   |
| 942 | <i>Desulfarculus baarsii</i>           | GCA_000143965.1_ASM14396v1_genomic.fna  |
| 943 | <i>Micromonospora aurantiaca</i>       | GCA_000145235.1_ASM14523v1_genomic.fna  |
| 944 | <i>Corynebacterium kroppenstedtii</i>  | GCA_000023145.1_ASM2314v1_genomic.fna   |
| 945 | <i>Flavobacteriaceae bacterium</i>     | GCA_000023725.1_ASM2372v1_genomic.fna   |
| 946 | <i>Pseudodesulfovibrio aespoeensis</i> | GCA_000176915.2_ASM17691v2_genomic.fna  |
| 947 | <i>Thermaerobacter marianensis</i>     | GCA_000184705.1_ASM18470v1_genomic.fna  |
| 948 | <i>Syntrophobotulus glycolicus</i>     | GCA_000190635.1_ASM19063v1_genomic.fna  |
| 949 | <i>Leadbetterella byssophila</i>       | GCA_000166395.1_ASM16639v1_genomic.fna  |

|     |                                            |                                         |
|-----|--------------------------------------------|-----------------------------------------|
| 950 | <i>Parachlamydia acanthamoebae</i>         | GCA_000253035.1_ASM25303v1_genomic.fna  |
| 951 | <i>Truepera radiovictrix</i>               | GCA_000092425.1_ASM9242v1_genomic.fna   |
| 952 | <i>Bacillus cellulosilyticus</i>           | GCA_000177235.2_ASM17723v2_genomic.fna  |
| 953 | <i>Acinetobacter nosocomialis</i>          | GCA_000814165.3_ASM81416v3_genomic.fna  |
| 954 | <i>Streptomyces griseus</i>                | GCA_000010605.1_ASM1060v1_genomic.fna   |
| 955 | <i>Desulfurispirillum indicum</i>          | GCA_000177635.2_ASM17763v2_genomic.fna  |
| 956 | <i>Rhodomicrobium vannielii</i>            | GCA_000166055.1_ASM16605v1_genomic.fna  |
| 957 | <i>Streptococcus oralis</i>                | GCA_000253155.1_ASM25315v1_genomic.fna  |
| 958 | <i>Aerococcus viridans</i>                 | GCA_001543285.1_ASM154328v1_genomic.fna |
| 959 | <i>Achromobacter xylosoxidans</i>          | GCA_001457475.1_NCTC10807_genomic.fna   |
| 960 | <i>Atopobium parvulum</i>                  | GCA_000024225.1_ASM2422v1_genomic.fna   |
| 961 | <i>Frankia symbiont</i>                    | GCA_000177615.2_ASM17761v2_genomic.fna  |
| 962 | <i>Zunongwangia profunda</i>               | GCA_000023465.1_ASM2346v1_genomic.fna   |
| 963 | <i>Thermoanaerobacter pseudethanolicus</i> | GCA_000019085.1_ASM1908v1_genomic.fna   |
| 964 | <i>Acidovorax citrulli</i>                 | GCA_000015325.1_ASM1532v1_genomic.fna   |
| 965 | <i>Magnetospirillum magneticum</i>         | GCA_000009985.1_ASM998v1_genomic.fna    |
| 966 | <i>Xanthomonas fuscans</i>                 | GCA_000969685.1_ASM96968v1_genomic.fna  |
| 967 | <i>Pseudomonas syringae</i>                | GCA_000007805.1_ASM780v1_genomic.fna    |
| 968 | <i>Pseudomonas savastanoi</i>              | GCA_000012205.1_ASM1220v1_genomic.fna   |
| 969 | <i>Corynebacterium ammoniagenes</i>        | GCA_001941425.1_ASM194142v1_genomic.fna |
| 970 | <i>Acinetobacter calcoaceticus</i>         | GCA_002055515.1_ASM205551v1_genomic.fna |
| 971 | <i>Acinetobacter johnsonii</i>             | GCA_001484935.1_ASM148493v1_genomic.fna |
| 972 | <i>Acinetobacter junii</i>                 | GCA_001941805.1_ASM194180v1_genomic.fna |
| 973 | <i>Methylobacterium mobilis</i>            | GCA_000023705.1_ASM2370v1_genomic.fna   |
| 974 | <i>Ethanoligenens harbinense</i>           | GCA_000178115.2_ASM17811v2_genomic.fna  |
| 975 | <i>Corynebacterium resistens</i>           | GCA_000177535.2_ASM17753v2_genomic.fna  |
| 976 | <i>Vibrio fluvialis</i>                    | GCA_001558415.1_ASM155841v1_genomic.fna |
| 977 | <i>Pantoea stewartii</i>                   | GCA_002082215.1_ASM208221v1_genomic.fna |
| 978 | <i>Spirochaeta thermophila</i>             | GCA_000184345.2_ASM18434v2_genomic.fna  |
| 979 | <i>Cronobacter turicensis</i>              | GCA_000027065.2_ASM2706v1_genomic.fna   |
| 980 | <i>Methylobacterium versatilis</i>         | GCA_000093025.1_ASM9302v1_genomic.fna   |
| 981 | <i>Bacillus smithii</i>                    | GCA_001050115.1_ASM105011v1_genomic.fna |
| 982 | <i>Pasteurella dagmatis</i>                | GCA_900186835.1_49950_F01_genomic.fna   |
| 983 | <i>Caldicellulosiruptor lactoaceticus</i>  | GCA_000193435.3_ASM19343v3_genomic.fna  |

|      |                                             |                                         |
|------|---------------------------------------------|-----------------------------------------|
| 984  | <i>Dehalogenimonas lykanthroporepellens</i> | GCA_000143165.1_ASM14316v1_genomic.fna  |
| 985  | <i>Oceanithermus profundus</i>              | GCA_000183745.1_ASM18374v1_genomic.fna  |
| 986  | <i>Bacteroides salanitronis</i>             | GCA_000190575.1_ASM19057v1_genomic.fna  |
| 987  | <i>Thermodesulfatator indicus</i>           | GCA_000217795.1_ASM21779v1_genomic.fna  |
| 988  | <i>Vibrio mimicus</i>                       | GCA_001558475.1_ASM155847v1_genomic.fna |
| 989  | <i>Komagataeibacter xylinus</i>             | GCA_000550765.1_ASM55076v1_genomic.fna  |
| 990  | <i>Vibrio alginolyticus</i>                 | GCA_000354175.2_ASM35417v2_genomic.fna  |
| 991  | <i>Nitrosococcus watsonii</i>               | GCA_000143085.1_ASM14308v1_genomic.fna  |
| 992  | <i>Caldicellulosiruptor obsidiansis</i>     | GCA_000145215.1_ASM14521v1_genomic.fna  |
| 993  | <i>Pediococcus acidilactici</i>             | GCA_001767275.1_ASM176727v1_genomic.fna |
| 994  | <i>Vibrio coralliilyticus</i>               | GCA_000763535.2_ASM76353v2_genomic.fna  |
| 995  | <i>Grimontia hollisae</i>                   | GCA_001558255.1_ASM155825v1_genomic.fna |
| 996  | <i>Vibrio furnissii</i>                     | GCA_000184325.1_ASM18432v1_genomic.fna  |
| 997  | <i>Pseudonocardia dioxanivorans</i>         | GCA_000196675.1_ASM19667v1_genomic.fna  |
| 998  | <i>Sulfobacillus acidophilus</i>            | GCA_000219855.1_ASM21985v1_genomic.fna  |
| 999  | <i>Parageobacillus thermoglucosidasius</i>  | GCA_001295365.1_ASM129536v1_genomic.fna |
| 1000 | <i>Caldicellulosiruptor hydrothermalis</i>  | GCA_000166355.1_ASM16635v1_genomic.fna  |
| 1001 | <i>Caldicellulosiruptor owensensis</i>      | GCA_000166335.1_ASM16633v1_genomic.fna  |
| 1002 | <i>Leuconostoc kimchii</i>                  | GCA_000092505.1_ASM9250v1_genomic.fna   |
| 1003 | <i>Corynebacterium pseudotuberculosis</i>   | GCA_000144675.1_ASM14467v1_genomic.fna  |
| 1004 | <i>Thermincola potens</i>                   | GCA_000092945.1_ASM9294v1_genomic.fna   |
| 1005 | <i>Enterobacter asburiae</i>                | GCA_000224675.1_ASM22467v1_genomic.fna  |
| 1006 | <i>Clostridium lentocellum</i>              | GCA_000178835.2_ASM17883v2_genomic.fna  |
| 1007 | <i>Pseudotherrmotoga thermarum</i>          | GCA_000217815.1_ASM21781v1_genomic.fna  |
| 1008 | <i>Cellulophaga algicola</i>                | GCA_000186265.1_ASM18626v1_genomic.fna  |
| 1009 | <i>Veillonella parvula</i>                  | GCA_000024945.1_ASM2494v1_genomic.fna   |
| 1010 | <i>Alicyclophilus denitrificans</i>         | GCA_000204645.1_ASM20464v1_genomic.fna  |
| 1011 | <i>Cupriavidus necator</i>                  | GCA_000219215.1_ASM21921v1_genomic.fna  |
| 1012 | <i>Bacillus cytotoxicus</i>                 | GCA_000017425.1_ASM1742v1_genomic.fna   |
| 1013 | <i>Borrelia bavariensis</i>                 | GCA_000196215.1_ASM19621v1_genomic.fna  |
| 1014 | <i>Pseudomonas amygdali</i>                 | GCA_002068135.1_ASM206813v1_genomic.fna |
| 1015 | <i>Deinococcus proteolyticus</i>            | GCA_000190555.1_ASM19055v1_genomic.fna  |
| 1016 | <i>Bacteroides helcogenes</i>               | GCA_000186225.1_ASM18622v1_genomic.fna  |
| 1017 | <i>Xanthomonas campestris</i>               | GCA_000009165.1_ASM916v1_genomic.fna    |

|      |                                            |                                         |
|------|--------------------------------------------|-----------------------------------------|
| 1018 | <i>Acinetobacter pittii</i>                | GCA_000191145.1_ASM19114v1_genomic.fna  |
| 1019 | <i>Scardovia inopinata</i>                 | GCA_001042695.1_ASM104269v1_genomic.fna |
| 1020 | <i>Riemerella anatipestifer</i>            | GCA_000252855.1_ASM25285v1_genomic.fna  |
| 1021 | <i>Paludibacter propionigenes</i>          | GCA_000183135.1_ASM18313v1_genomic.fna  |
| 1022 | <i>Lactobacillus amylovorus</i>            | GCA_000191545.1_ASM19154v1_genomic.fna  |
| 1023 | <i>Clostridium saccharolyticum</i>         | GCA_000144625.1_ASM14462v1_genomic.fna  |
| 1024 | <i>Mahella australiensis</i>               | GCA_000213255.1_ASM21325v1_genomic.fna  |
| 1025 | <i>Thermoanaerobacter wiegelii</i>         | GCA_000147695.3_ASM14769v3_genomic.fna  |
| 1026 | <i>Staphylococcus lugdunensis</i>          | GCA_000025085.1_ASM2508v1_genomic.fna   |
| 1027 | <i>Streptococcus constellatus</i>          | GCA_000463395.1_ASM46339v1_genomic.fna  |
| 1028 | <i>Parascardovia denticolens</i>           | GCA_001042675.1_ASM104267v1_genomic.fna |
| 1029 | <i>Caldicellulosiruptor kristjanssonii</i> | GCA_000166695.1_ASM16669v1_genomic.fna  |
| 1030 | <i>Coriobacterium glomerans</i>            | GCA_000195315.1_ASM19531v1_genomic.fna  |
| 1031 | <i>Niastella koreensis</i>                 | GCA_000246855.1_ASM24685v1_genomic.fna  |
| 1032 | <i>Streptomyces violaceusniger</i>         | GCA_000147815.3_ASM14781v3_genomic.fna  |
| 1033 | <i>Halanaerobium hydrogeniformans</i>      | GCA_000166415.1_ASM16641v1_genomic.fna  |
| 1034 | <i>Pantoea ananatis</i>                    | GCA_000025405.2_ASM2540v1_genomic.fna   |
| 1035 | <i>Streptococcus anginosus</i>             | GCA_000463505.1_ASM46350v1_genomic.fna  |
| 1036 | <i>Desulfomonile tiedjei</i>               | GCA_000266945.1_ASM26694v1_genomic.fna  |
| 1037 | <i>Acinetobacter haemolyticus</i>          | GCA_001932555.1_ASM193255v1_genomic.fna |
| 1038 | <i>Mycoplasma suis</i>                     | GCA_000179035.2_ASM17903v2_genomic.fna  |
| 1039 | <i>Deinococcus maricopensis</i>            | GCA_000186385.1_ASM18638v1_genomic.fna  |
| 1040 | <i>Odoribacter splanchnicus</i>            | GCA_000190535.1_ASM19053v1_genomic.fna  |
| 1041 | <i>Amycolatopsis mediterranei</i>          | GCA_000196835.1_ASM19683v1_genomic.fna  |
| 1042 | <i>Sulfuricurvum kujiense</i>              | GCA_000183725.1_ASM18372v1_genomic.fna  |
| 1043 | <i>Pantoea vagans</i>                      | GCA_000148935.1_ASM14893v1_genomic.fna  |
| 1044 | <i>Lactobacillus sanfranciscensis</i>      | GCA_000225325.1_ASM22532v1_genomic.fna  |
| 1045 | <i>Lysinibacillus fusiformis</i>           | GCA_000724775.3_ASM72477v3_genomic.fna  |
| 1046 | <i>Streptococcus gallolyticus</i>          | GCA_002000985.1_ASM200098v1_genomic.fna |
| 1047 | <i>Roseburia hominis</i>                   | GCA_000225345.1_ASM22534v1_genomic.fna  |
| 1048 | <i>Intrasporangium calvum</i>              | GCA_000184685.1_ASM18468v1_genomic.fna  |
| 1049 | <i>Waddlia chondrophila</i>                | GCA_000092785.1_ASM9278v1_genomic.fna   |
| 1050 | <i>Acinetobacter oleivorans</i>            | GCA_000196795.1_ASM19679v1_genomic.fna  |
| 1051 | <i>Flexistipes sinusarabici</i>            | GCA_000218625.1_ASM21862v1_genomic.fna  |

|      |                                            |                                        |
|------|--------------------------------------------|----------------------------------------|
| 1052 | <i>Marinobacter adhaerens</i>              | GCA_000166295.1_ASM16629v1_genomic.fna |
| 1053 | <i>Deferribacter desulfuricans</i>         | GCA_000010985.1_ASM1098v1_genomic.fna  |
| 1054 | <i>Thermus scotoductus</i>                 | GCA_000187005.1_ASM18700v1_genomic.fna |
| 1055 | <i>Nitrospira defluvii</i>                 | GCA_000196815.1_ASM19681v1_genomic.fna |
| 1056 | <i>Mycoplasma putrefaciens</i>             | GCA_000224105.1_ASM22410v1_genomic.fna |
| 1057 | <i>Taylorella equigenitalis</i>            | GCA_000276685.1_ASM27668v1_genomic.fna |
| 1058 | <i>Treponema caldarium</i>                 | GCA_000219725.1_ASM21972v1_genomic.fna |
| 1059 | <i>Thermodesulfobium narugense</i>         | GCA_000212395.1_ASM21239v1_genomic.fna |
| 1060 | <i>Desulfotomaculum nigrificans</i>        | GCA_000214435.1_ASM21443v1_genomic.fna |
| 1061 | <i>Nitratifractor salsuginis</i>           | GCA_000186245.1_ASM18624v1_genomic.fna |
| 1062 | <i>Sphingobium japonicum</i>               | GCA_000091125.1_ASM9112v1_genomic.fna  |
| 1063 | <i>Rubinisphaera brasiliensis</i>          | GCA_000165715.3_ASM16571v3_genomic.fna |
| 1064 | <i>Streptomyces bingchenggensis</i>        | GCA_000092385.1_ASM9238v1_genomic.fna  |
| 1065 | <i>Leptospira santarosai</i>               | GCA_000313175.2_ASM31317v2_genomic.fna |
| 1066 | <i>Fluviicola taffensis</i>                | GCA_000194605.1_ASM19460v1_genomic.fna |
| 1067 | <i>Desulfotomaculum ruminis</i>            | GCA_000215085.1_ASM21508v1_genomic.fna |
| 1068 | <i>Granulicella mallensis</i>              | GCA_000178955.2_ASM17895v2_genomic.fna |
| 1069 | <i>Sphaerochaeta globosa</i>               | GCA_000190435.1_ASM19043v1_genomic.fna |
| 1070 | <i>Ketogulonicigenium vulgare</i>          | GCA_000223375.1_ASM22337v1_genomic.fna |
| 1071 | <i>Citrobacter freundii</i>                | GCA_000648515.1_ASM64851v1_genomic.fna |
| 1072 | <i>Eggerthella lenta</i>                   | GCA_000024265.1_ASM2426v1_genomic.fna  |
| 1073 | <i>Sphaerochaeta coccoides</i>             | GCA_000208385.1_ASM20838v1_genomic.fna |
| 1074 | <i>Hippea maritima</i>                     | GCA_000194135.1_ASM19413v1_genomic.fna |
| 1075 | <i>Haliscomenobacter hydrossis</i>         | GCA_000212735.1_ASM21273v1_genomic.fna |
| 1076 | <i>Brachyspira pilosicoli</i>              | GCA_000325665.1_ASM32566v1_genomic.fna |
| 1077 | <i>Streptococcus parasanguinis</i>         | GCA_000164675.2_ASM16467v2_genomic.fna |
| 1078 | <i>Terriglobus saanensis</i>               | GCA_000179915.2_ASM17991v2_genomic.fna |
| 1079 | <i>Mesotoga prima</i>                      | GCA_000147715.3_ASM14771v3_genomic.fna |
| 1080 | <i>Runella slithyformis</i>                | GCA_000218895.1_ASM21889v1_genomic.fna |
| 1081 | <i>Pseudopropionibacterium propionicum</i> | GCA_000277715.1_ASM27771v1_genomic.fna |
| 1082 | <i>Prevotella denticola</i>                | GCA_000193395.1_ASM19339v1_genomic.fna |
| 1083 | <i>Pseudopedobacter saltans</i>            | GCA_000190735.2_ASM19073v2_genomic.fna |
| 1084 | <i>Thermovibrio ammonificans</i>           | GCA_000185805.1_ASM18580v1_genomic.fna |
| 1085 | <i>Calditerrivibrio nitroreducens</i>      | GCA_000183405.1_ASM18340v1_genomic.fna |



|      |                                              |                                         |
|------|----------------------------------------------|-----------------------------------------|
| 1086 | <i>Isoptericola variabilis</i>               | GCA_000215105.1_ASM21510v1_genomic.fna  |
| 1087 | <i>Pseudomonas fulva</i>                     | GCA_000213805.1_ASM21380v1_genomic.fna  |
| 1088 | <i>Sphingobium chlorophenicum</i>            | GCA_000147835.3_ASM14783v3_genomic.fna  |
| 1089 | <i>Capnocytophaga canimorsus</i>             | GCA_000220625.1_ASM22062v1_genomic.fna  |
| 1090 | <i>Thermoanaerobacterium xylanolyticum</i>   | GCA_000189775.3_ASM18977v3_genomic.fna  |
| 1091 | <i>Haemophilus parainfluenzae</i>            | GCA_000210895.1_ASM21089v1_genomic.fna  |
| 1092 | <i>Weeksella virosa</i>                      | GCA_000189415.1_ASM18941v1_genomic.fna  |
| 1093 | <i>Rahnella aquatilis</i>                    | GCA_000255535.1_ASM25553v1_genomic.fna  |
| 1094 | <i>Vibrio tubiashii</i>                      | GCA_000772105.1_ASM77210v1_genomic.fna  |
| 1095 | <i>Cellulophaga lytica</i>                   | GCA_000190595.1_ASM19059v1_genomic.fna  |
| 1096 | <i>Treponema succinifaciens</i>              | GCA_000195275.1_ASM19527v1_genomic.fna  |
| 1097 | <i>Marinithermus hydrothermalis</i>          | GCA_000195335.1_ASM19533v1_genomic.fna  |
| 1098 | <i>Aerococcus urinae</i>                     | GCA_001543175.1_ASM154317v1_genomic.fna |
| 1099 | <i>Veillonella atypica</i>                   | GCA_002082765.1_ASM208276v1_genomic.fna |
| 1100 | <i>Vibrio scophthalmi</i>                    | GCA_001685465.1_ASM168546v1_genomic.fna |
| 1101 | <i>Desulfurobacterium thermolithotrophum</i> | GCA_000191045.1_ASM19104v1_genomic.fna  |
| 1102 | <i>Porphyromonas asaccharolytica</i>         | GCA_000212375.1_ASM21237v1_genomic.fna  |
| 1103 | <i>Capnocytophaga ochracea</i>               | GCA_000023285.1_ASM2328v1_genomic.fna   |
| 1104 | <i>Actinomyces oris</i>                      | GCA_001553935.1_ASM155393v1_genomic.fna |
| 1105 | <i>Sinorhizobium fredii</i>                  | GCA_000018545.1_ASM1854v1_genomic.fna   |
| 1106 | <i>Vibrio anguillarum</i>                    | GCA_000217675.1_ASM21767v1_genomic.fna  |
| 1107 | <i>Anaerococcus prevotii</i>                 | GCA_000024105.1_ASM2410v1_genomic.fna   |
| 1108 | <i>Mycoplasma hominis</i>                    | GCA_000085865.1_ASM8586v1_genomic.fna   |
| 1109 | <i>Staphylococcus simulans</i>               | GCA_001559115.1_ASM155911v1_genomic.fna |
| 1110 | <i>Myroides odoratimimus</i>                 | GCA_001481655.1_ASM148165v1_genomic.fna |
| 1111 | <i>Eubacterium limosum</i>                   | GCA_000807675.2_ASM80767v2_genomic.fna  |
| 1112 | <i>Muricauda ruestringensis</i>              | GCA_000224085.1_ASM22408v1_genomic.fna  |
| 1113 | <i>Marinomonas posidonica</i>                | GCA_000214215.1_ASM21421v1_genomic.fna  |
| 1114 | <i>Desulfotomaculum kuznetsovii</i>          | GCA_000214705.1_ASM21470v1_genomic.fna  |
| 1115 | <i>Streptococcus parauberis</i>              | GCA_000213825.1_ASM21382v1_genomic.fna  |
| 1116 | <i>Leuconostoc lactis</i>                    | GCA_001698145.1_ASM169814v1_genomic.fna |
| 1117 | <i>Marinomonas mediterranea</i>              | GCA_000192865.1_ASM19286v1_genomic.fna  |
| 1118 | <i>Thiomicrospira cyclica</i>                | GCA_000214825.1_ASM21482v1_genomic.fna  |
| 1119 | <i>Acetobacter aceti</i>                     | GCA_002005445.1_ASM200544v1_genomic.fna |

|      |                                            |                                         |
|------|--------------------------------------------|-----------------------------------------|
| 1120 | <i>gamma proteobacterium</i>               | GCA_000198515.1_ASM19851v1_genomic.fna  |
| 1121 | <i>Desulfovibrio africanus</i>             | GCA_000212675.2_ASM21267v2_genomic.fna  |
| 1122 | <i>Rhodothermus marinus</i>                | GCA_000024845.1_ASM2484v1_genomic.fna   |
| 1123 | <i>Enterobacter hormaechei</i>             | GCA_001729725.1_ASM172972v1_genomic.fna |
| 1124 | <i>Streptococcus cristatus</i>             | GCA_000385925.1_ASM38592v1_genomic.fna  |
| 1125 | <i>Streptococcus pseudopneumoniae</i>      | GCA_000221985.1_ASM22198v1_genomic.fna  |
| 1126 | <i>Glutamicibacter arilaitensis</i>        | GCA_000197735.1_ASM19773v1_genomic.fna  |
| 1127 | <i>Desulfobacca acetoxidans</i>            | GCA_000195295.1_ASM19529v1_genomic.fna  |
| 1128 | <i>Caldicellulosiruptor kronotskyensis</i> | GCA_000166775.1_ASM16677v1_genomic.fna  |
| 1129 | <i>Treponema brennaborens</i>              | GCA_000212415.1_ASM21241v1_genomic.fna  |
| 1130 | <i>Methylomonas methanica</i>              | GCA_000214665.1_ASM21466v1_genomic.fna  |
| 1131 | <i>Thermobacillus composti</i>             | GCA_000227705.3_ASM22770v3_genomic.fna  |
| 1132 | <i>Plautia stali</i>                       | GCA_000180175.2_ASM18017v2_genomic.fna  |
| 1133 | <i>Weissella cibaria</i>                   | GCA_001308145.2_ASM130814v2_genomic.fna |
| 1134 | <i>Desulfotomaculum gibsoniae</i>          | GCA_000233715.3_ASM23371v3_genomic.fna  |
| 1135 | <i>Xanthomonas vesicatoria</i>             | GCA_001908725.1_ASM190872v1_genomic.fna |
| 1136 | <i>Xanthomonas perforans</i>               | GCA_000192045.3_ASM19204v3_genomic.fna  |
| 1137 | <i>Anaerolinea thermophila</i>             | GCA_000199675.1_ASM19967v1_genomic.fna  |
| 1138 | <i>Paraburkholderia rhizoxinica</i>        | GCA_000198775.1_ASM19877v1_genomic.fna  |
| 1139 | <i>Leuconostoc gelidum</i>                 | GCA_000196855.1_ASM19685v1_genomic.fna  |
| 1140 | <i>Sanguibacter keddieii</i>               | GCA_000024925.1_ASM2492v1_genomic.fna   |
| 1141 | <i>Gordonia bronchialis</i>                | GCA_000024785.1_ASM2478v1_genomic.fna   |
| 1142 | <i>Haliangium ochraceum</i>                | GCA_000024805.1_ASM2480v1_genomic.fna   |
| 1143 | <i>Sulfurospirillum deleyianum</i>         | GCA_000024885.1_ASM2488v1_genomic.fna   |
| 1144 | <i>Streptobacillus moniliformis</i>        | GCA_000024565.1_ASM2456v1_genomic.fna   |
| 1145 | <i>Sealdella termitidis</i>                | GCA_000024405.1_ASM2440v1_genomic.fna   |
| 1146 | <i>Thermomonospora curvata</i>             | GCA_000024385.1_ASM2438v1_genomic.fna   |
| 1147 | <i>Thermanaerovibrio acidaminovorans</i>   | GCA_000024905.1_ASM2490v1_genomic.fna   |
| 1148 | <i>Xylanimonas cellulosilytica</i>         | GCA_000024965.1_ASM2496v1_genomic.fna   |
| 1149 | <i>Sphaerobacter thermophilus</i>          | GCA_000024985.1_ASM2498v1_genomic.fna   |
| 1150 | <i>Thermobaculum terrenum</i>              | GCA_000025005.1_ASM2500v1_genomic.fna   |
| 1151 | <i>Streptosporangium roseum</i>            | GCA_000024865.1_ASM2486v1_genomic.fna   |
| 1152 | <i>Spirosoma linguale</i>                  | GCA_000024525.1_ASM2452v1_genomic.fna   |
| 1153 | <i>Kribbella flavida</i>                   | GCA_000024345.1_ASM2434v1_genomic.fna   |

|      |                                        |                                        |
|------|----------------------------------------|----------------------------------------|
| 1154 | <i>Geodermatophilus obscurus</i>       | GCA_000025345.1_ASM2534v1_genomic.fna  |
| 1155 | <i>Denitrovibrio acetiphilus</i>       | GCA_000025725.1_ASM2572v1_genomic.fna  |
| 1156 | <i>Meiothermus ruber</i>               | GCA_000024425.1_ASM2442v1_genomic.fna  |
| 1157 | <i>Stackebrandtia nassauensis</i>      | GCA_000024545.1_ASM2454v1_genomic.fna  |
| 1158 | <i>Planctopirus limnophila</i>         | GCA_000092105.1_ASM9210v1_genomic.fna  |
| 1159 | <i>Brachyspira murdochii</i>           | GCA_000092845.1_ASM9284v1_genomic.fna  |
| 1160 | <i>Cellulomonas flavigena</i>          | GCA_000092865.1_ASM9286v1_genomic.fna  |
| 1161 | <i>Tsukamurella paurometabola</i>      | GCA_000092225.1_ASM9222v1_genomic.fna  |
| 1162 | <i>Thermobispora bispora</i>           | GCA_000092645.1_ASM9264v1_genomic.fna  |
| 1163 | <i>Nocardiosis dassonvillei</i>        | GCA_000092985.1_ASM9298v1_genomic.fna  |
| 1164 | <i>Brachybacterium faecium</i>         | GCA_000023405.1_ASM2340v1_genomic.fna  |
| 1165 | <i>Actinosynnema mirum</i>             | GCA_000023245.1_ASM2324v1_genomic.fna  |
| 1166 | <i>Cryptobacterium curtum</i>          | GCA_000023845.1_ASM2384v1_genomic.fna  |
| 1167 | <i>Beutenbergia cavernae</i>           | GCA_000023105.1_ASM2310v1_genomic.fna  |
| 1168 | <i>Dyadobacter fermentans</i>          | GCA_000023125.1_ASM2312v1_genomic.fna  |
| 1169 | <i>Slackia heliotrinireducens</i>      | GCA_000023885.1_ASM2388v1_genomic.fna  |
| 1170 | <i>Jonesia denitrificans</i>           | GCA_000024065.1_ASM2406v1_genomic.fna  |
| 1171 | <i>Meiothermus silvanus</i>            | GCA_000092125.1_ASM9212v1_genomic.fna  |
| 1172 | <i>Kytococcus sedentarius</i>          | GCA_000023925.1_ASM2392v1_genomic.fna  |
| 1173 | <i>Catenulispora acidiphila</i>        | GCA_000024025.1_ASM2402v1_genomic.fna  |
| 1174 | <i>Desulfotomaculum acetoxidans</i>    | GCA_000024205.1_ASM2420v1_genomic.fna  |
| 1175 | <i>Pedobacter heparinus</i>            | GCA_000023825.1_ASM2382v1_genomic.fna  |
| 1176 | <i>Chitinophaga pinensis</i>           | GCA_000024005.1_ASM2400v1_genomic.fna  |
| 1177 | <i>Desulfohalobium retbaense</i>       | GCA_000024325.1_ASM2432v1_genomic.fna  |
| 1178 | <i>Kangiella koreensis</i>             | GCA_000024085.1_ASM2408v1_genomic.fna  |
| 1179 | <i>Leptotrichia buccalis</i>           | GCA_000023905.1_ASM2390v1_genomic.fna  |
| 1180 | <i>Acidimicrobium ferrooxidans</i>     | GCA_000023265.1_ASM2326v1_genomic.fna  |
| 1181 | <i>Desulfomicrobium baculatum</i>      | GCA_000023225.1_ASM2322v1_genomic.fna  |
| 1182 | <i>Nakamurella multipartita</i>        | GCA_000024365.1_ASM2436v1_genomic.fna  |
| 1183 | <i>Klebsiella aerogenes</i>            | GCA_000215745.1_ASM21574v1_genomic.fna |
| 1184 | <i>Saccharomonospora viridis</i>       | GCA_000023865.1_ASM2386v1_genomic.fna  |
| 1185 | <i>Desulfitobacterium dehalogenans</i> | GCA_000243155.3_ASM24315v3_genomic.fna |
| 1186 | <i>Helicobacter felis</i>              | GCA_000200595.1_ASM20059v1_genomic.fna |
| 1187 | <i>Staphylococcus pseudintermedius</i> | GCA_000185885.1_ASM18588v1_genomic.fna |

|      |                                             |                                         |
|------|---------------------------------------------|-----------------------------------------|
| 1188 | <i>Desulfitobacterium metallireducens</i>   | GCA_000231405.3_ASM23140v3_genomic.fna  |
| 1189 | <i>Planococcus donghaensis</i>              | GCA_001687665.2_ASM168766v2_genomic.fna |
| 1190 | <i>Acidithiobacillus ferrivorans</i>        | GCA_000214095.3_ASM21409v3_genomic.fna  |
| 1191 | <i>Acetobacter pomorum</i>                  | GCA_002456135.1_ASM245613v1_genomic.fna |
| 1192 | <i>Desulfitobacterium dichloroeliminans</i> | GCA_000243135.3_ASM24313v3_genomic.fna  |
| 1193 | <i>Desulfosporosinus acidiphilus</i>        | GCA_000255115.3_ASM25511v3_genomic.fna  |
| 1194 | <i>Xanthomonas gardneri</i>                 | GCA_001908775.1_ASM190877v1_genomic.fna |
| 1195 | <i>Corynebacterium ulcerans</i>             | GCA_000215645.1_ASM21564v1_genomic.fna  |
| 1196 | <i>Marichromatium purpuratum</i>            | GCA_000224005.3_ASM22400v3_genomic.fna  |
| 1197 | <i>Bartonella clarridgeiae</i>              | GCA_000253015.1_ASM25301v1_genomic.fna  |
| 1198 | <i>Microbacterium testaceum</i>             | GCA_000202635.1_ASM20263v1_genomic.fna  |
| 1199 | <i>Verrucosipora maris</i>                  | GCA_000204155.1_ASM20415v1_genomic.fna  |
| 1200 | <i>Chlamydophila pecorum</i>                | GCA_000204135.1_ASM20413v1_genomic.fna  |
| 1201 | <i>Vibrio rotiferianus</i>                  | GCA_002214395.1_ASM221439v1_genomic.fna |
| 1202 | <i>Hoyosella subflava</i>                   | GCA_000214175.1_ASM21417v1_genomic.fna  |
| 1203 | <i>Aeromonas veronii</i>                    | GCA_000204115.1_ASM20411v1_genomic.fna  |
| 1204 | <i>Terriglobus roseus</i>                   | GCA_000265425.1_ASM26542v1_genomic.fna  |
| 1205 | <i>Polymorphum gilvum</i>                   | GCA_000192745.1_ASM19274v1_genomic.fna  |
| 1206 | <i>Acidiphilium multivorum</i>              | GCA_000202835.1_ASM20283v1_genomic.fna  |
| 1207 | <i>Paenibacillus mucilaginosus</i>          | GCA_000250655.1_ASM25065v1_genomic.fna  |
| 1208 | <i>Burkholderia gladioli</i>                | GCA_000959725.1_ASM95972v1_genomic.fna  |
| 1209 | <i>Mycobacterium abscessus</i>              | GCA_000758225.1_ASM75822v1_genomic.fna  |
| 1210 | <i>Echinicola vietnamensis</i>              | GCA_000325705.1_ASM32570v1_genomic.fna  |
| 1211 | <i>Pseudomonas brassicacearum</i>           | GCA_000194805.1_ASM19480v1_genomic.fna  |
| 1212 | <i>Gallibacterium anatis</i>                | GCA_000209675.1_ASM20967v1_genomic.fna  |
| 1213 | <i>Owenweeksia hongkongensis</i>            | GCA_000236705.1_ASM23670v1_genomic.fna  |
| 1214 | <i>Rickettsia amblyommatis</i>              | GCA_001273795.1_ASM127379v1_genomic.fna |
| 1215 | <i>Melissococcus plutonius</i>              | GCA_000747585.1_ASM74758v1_genomic.fna  |
| 1216 | <i>Microlunatus phosphovorus</i>            | GCA_000270245.1_ASM27024v1_genomic.fna  |
| 1217 | <i>Haemophilus pittmaniae</i>               | GCA_900186995.1_50465_A02_genomic.fna   |
| 1218 | <i>Advenella mimigardefordensis</i>         | GCA_000521505.1_ASM52150v1_genomic.fna  |
| 1219 | <i>Rickettsia heilongjiangensis</i>         | GCA_000221205.1_ASM22120v1_genomic.fna  |
| 1220 | <i>Lactobacillus kefiranoferiens</i>        | GCA_000214785.1_ASM21478v1_genomic.fna  |
| 1221 | <i>Streptomyces xinghaiensis</i>            | GCA_000220705.2_ASM22070v2_genomic.fna  |

|      |                                        |                                         |
|------|----------------------------------------|-----------------------------------------|
| 1222 | <i>Streptococcus pasteurianus</i>      | GCA_000270165.1_ASM27016v1_genomic.fna  |
| 1223 | <i>Mycobacterium colombiense</i>       | GCA_002105755.1_ASM210575v1_genomic.fna |
| 1224 | <i>Brevibacillus laterosporus</i>      | GCA_000219535.3_ASM21953v3_genomic.fna  |
| 1225 | <i>Brachyspira intermedia</i>          | GCA_000223215.1_ASM22321v1_genomic.fna  |
| 1226 | <i>Weissella koreensis</i>             | GCA_000219805.1_ASM21980v1_genomic.fna  |
| 1227 | <i>Neisseria weaveri</i>               | GCA_900086555.1_34903_D01_genomic.fna   |
| 1228 | <i>Mycobacterium africanum</i>         | GCA_000253355.1_ASM25335v1_genomic.fna  |
| 1229 | <i>Pantoea agglomerans</i>             | GCA_001709315.1_ASM170931v1_genomic.fna |
| 1230 | <i>Cyclobacterium marinum</i>          | GCA_000222485.1_ASM22248v1_genomic.fna  |
| 1231 | <i>Mycobacterium canettii</i>          | GCA_000253375.1_ASM25337v1_genomic.fna  |
| 1232 | <i>Burkholderia cepacia</i>            | GCA_001411495.1_ASM141149v1_genomic.fna |
| 1233 | <i>Paenibacillus riograndensis</i>     | GCA_000981585.1_SBR5_T_genomic.fna      |
| 1234 | <i>Borrelia bisettii</i>               | GCA_000222305.1_ASM22230v1_genomic.fna  |
| 1235 | <i>Vibrio nigripulchritudo</i>         | GCA_000801275.1_ASM80127v1_genomic.fna  |
| 1236 | <i>Desulfosporosinus meridiei</i>      | GCA_000231385.3_ASM23138v3_genomic.fna  |
| 1237 | <i>Fervidobacterium pennivorans</i>    | GCA_000235405.3_ASM23540v3_genomic.fna  |
| 1238 | <i>Xanthomonas axonopodis</i>          | GCA_000225915.1_ASM22591v1_genomic.fna  |
| 1239 | <i>Nitrospirillum amazonense</i>       | GCA_000730165.2_ASM73016v2_genomic.fna  |
| 1240 | <i>Xanthomonas sacchari</i>            | GCA_000815185.1_ASM81518v1_genomic.fna  |
| 1241 | <i>Tetragenococcus halophilus</i>      | GCA_000283615.1_ASM28361v1_genomic.fna  |
| 1242 | <i>Mycoplasma yeatsii</i>              | GCA_000875755.1_ASM87575v1_genomic.fna  |
| 1243 | <i>Enterococcus hirae</i>              | GCA_000271405.2_ASM27140v2_genomic.fna  |
| 1244 | <i>Bacillus methanolicus</i>           | GCA_000724485.1_ASM72448v1_genomic.fna  |
| 1245 | <i>Ornithobacterium rhinotracheale</i> | GCA_000265465.1_ASM26546v1_genomic.fna  |
| 1246 | <i>Hafnia alvei</i>                    | GCA_000597785.2_ASM59778v2_genomic.fna  |
| 1247 | <i>Streptomyces venezuelae</i>         | GCA_001443625.1_ASM144362v1_genomic.fna |
| 1248 | <i>Lactobacillus pentosus</i>          | GCA_002211885.1_ASM221188v1_genomic.fna |
| 1249 | <i>Lactobacillus acidipiscis</i>       | GCA_900116935.1_Chromosome_genomic.fna  |
| 1250 | <i>Rhodococcus aetherivorans</i>       | GCA_000982715.1_ASM98271v1_genomic.fna  |
| 1251 | <i>Lactobacillus curvatus</i>          | GCA_002224425.1_ASM222442v1_genomic.fna |
| 1252 | <i>Staphylococcus sciuri</i>           | GCA_002209165.1_ASM220916v1_genomic.fna |
| 1253 | <i>Proteus vulgaris</i>                | GCA_001281565.1_ASM128156v1_genomic.fna |
| 1254 | <i>Leptospirillum ferrooxidans</i>     | GCA_000284315.1_ASM28431v1_genomic.fna  |
| 1255 | <i>Tatumella citrea</i>                | GCA_002163585.1_ASM216358v1_genomic.fna |

|      |                                         |                                                      |
|------|-----------------------------------------|------------------------------------------------------|
| 1256 | <i>Paracoccus aminophilus</i>           | GCA_000444995.1_ASM44499v1_genomic.fna               |
| 1257 | <i>Acetomicrobium mobile</i>            | GCA_000266925.1_ASM26692v1_genomic.fna               |
| 1258 | <i>Solitalea canadensis</i>             | GCA_000242635.3_ASM24263v3_genomic.fna               |
| 1259 | <i>Saprospira grandis</i>               | GCA_000250635.1_ASM25063v1_genomic.fna               |
| 1260 | <i>Niabella soli</i>                    | GCA_000243115.3_ASM24311v3_genomic.fna               |
| 1261 | <i>Deinococcus peraridilitoris</i>      | GCA_000317835.1_ASM31783v1_genomic.fna               |
| 1262 | <i>Micavibrio aeruginosavorus</i>       | GCA_000226315.1_ASM22631v1_genomic.fna               |
| 1263 | <i>Chloracidobacterium thermophilum</i> | GCA_000226295.1_ASM22629v1_genomic.fna               |
| 1264 | <i>Flavobacterium branchiophilum</i>    | GCA_000253275.1_ASM25327v1_genomic.fna               |
| 1265 | <i>Singulisphaera acidiphila</i>        | GCA_000242455.3_ASM24245v3_genomic.fna               |
| 1266 | <i>Pediococcus damnosus</i>             | GCA_001611135.1_ASM161113v1_genomic.fna              |
| 1267 | <i>Glaciecola nitratreducens</i>        | GCA_000226565.1_ASM22656v1_genomic.fna               |
| 1268 | <i>Taylorella asinigenitalis</i>        | GCA_000226625.1_ASM22662v1_genomic.fna               |
| 1269 | <i>Morganella morganii</i>              | GCA_000286435.2_ASM28643v2_genomic.fna               |
| 1270 | <i>Cutibacterium avidum</i>             | GCA_000367205.1_ASM36720v1_genomic.fna               |
| 1271 | <i>Komagataeibacter europaeus</i>       | GCA_002173515.1_ASM217351v1_genomic.fna              |
| 1272 | <i>Thiomicrospira aerophila</i>         | GCA_000227665.3_ASM22766v3_genomic.fna               |
| 1273 | <i>Thiocystis violascens</i>            | GCA_000227745.3_ASM22774v3_genomic.fna               |
| 1274 | <i>Tannerella forsythia</i>             | GCA_000238215.1_ASM23821v1_genomic.fna               |
| 1275 | <i>Prevotella intermedia</i>            | GCA_001953955.1_ASM195395v1_genomic.fna              |
| 1276 | <i>Streptomyces ambofaciens</i>         | GCA_001267885.1_ASM126788v1_genomic.fna              |
| 1277 | <i>Actinomyces naeslundii</i>           | GCA_002355915.1_ASM235591v1_genomic.fna              |
| 1278 | <i>Thermodesulfobacterium commune</i>   | GCA_000734015.1_ASM73401v1_genomic.fna               |
| 1279 | <i>Clostridium pasteurianum</i>         | GCA_000807255.1_ASM80725v1_genomic.fna               |
| 1280 | <i>Mycobacterium microti</i>            | GCA_001544815.1_ASM154481v1_genomic.fna              |
| 1281 | <i>Wolbachia endosymbiont</i>           | GCA_000530755.1_W_O_volvulus_Cameroon_v3_genomic.fna |
| 1282 | <i>Legionella hackeliae</i>             | GCA_000953655.1_LHA_genomic.fna                      |
| 1283 | <i>Azospirillum brasilense</i>          | GCA_001315015.1_ASM131501v1_genomic.fna              |
| 1284 | <i>Rhizobium tropici</i>                | GCA_000330885.1_ASM33088v1_genomic.fna               |
| 1285 | <i>Mycobacterium chelonae</i>           | GCA_001632805.1_ASM163280v1_genomic.fna              |
| 1286 | <i>Vibrio campbellii</i>                | GCA_000017705.1_ASM1770v1_genomic.fna                |
| 1287 | <i>Maize bushy</i>                      | GCA_001712875.1_ASM171287v1_genomic.fna              |
| 1288 | <i>Rickettsia slovaca</i>               | GCA_000237845.1_ASM23784v1_genomic.fna               |
| 1289 | <i>Staphylococcus xylosus</i>           | GCA_000706685.1_ASM70668v1_genomic.fna               |

|      |                                      |                                           |
|------|--------------------------------------|-------------------------------------------|
| 1290 | <i>Pseudomonas pseudoalcaligenes</i> | GCA_000297075.2_Ppseudo_final_genomic.fna |
| 1291 | <i>Acidaminococcus intestini</i>     | GCA_000230275.1_ASM23027v1_genomic.fna    |
| 1292 | <i>Nonlabens dokdonensis</i>         | GCA_000332115.1_ASM33211v1_genomic.fna    |
| 1293 | <i>Thermovirga lienii</i>            | GCA_000233775.1_ASM23377v1_genomic.fna    |
| 1294 | <i>Shimwellia blattae</i>            | GCA_000262305.1_ASM26230v1_genomic.fna    |
| 1295 | <i>Aerococcus christensenii</i>      | GCA_001543105.1_ASM154310v1_genomic.fna   |
| 1296 | <i>Chroococcidiopsis thermalis</i>   | GCA_000317125.1_ASM31712v1_genomic.fna    |
| 1297 | <i>Desulfobacula toluolica</i>       | GCA_000307105.1_ASM30710v1_genomic.fna    |
| 1298 | <i>Rickettsia japonica</i>           | GCA_000283595.1_ASM28359v1_genomic.fna    |
| 1299 | <i>Anaerostipes hadrus</i>           | GCA_001998765.1_ASM199876v1_genomic.fna   |
| 1300 | <i>Dechlorosoma suillum</i>          | GCA_000236665.1_ASM23666v1_genomic.fna    |
| 1301 | <i>Rubrobacter radiotolerans</i>     | GCA_000661895.1_ASM66189v1_genomic.fna    |
| 1302 | <i>Flavonifractor plautii</i>        | GCA_001688625.2_ASM168862v2_genomic.fna   |
| 1303 | <i>Cyanobacterium stanieri</i>       | GCA_000317655.1_ASM31765v1_genomic.fna    |
| 1304 | <i>Alistipes finegoldii</i>          | GCA_000265365.1_ASM26536v1_genomic.fna    |
| 1305 | <i>Bacillus simplex</i>              | GCA_001578185.1_ASM157818v1_genomic.fna   |
| 1306 | <i>Mycobacterium indicus</i>         | GCA_000298095.1_ASM29809v1_genomic.fna    |
| 1307 | <i>Actinobacillus suis</i>           | GCA_000739435.1_ASM73943v1_genomic.fna    |
| 1308 | <i>Amphibacillus xylanus</i>         | GCA_000307165.1_ASM30716v1_genomic.fna    |
| 1309 | <i>Pediococcus clausenii</i>         | GCA_000237995.2_ASM23799v2_genomic.fna    |
| 1310 | <i>Planktomarina temperata</i>       | GCA_000738435.1_ASM73843v1_genomic.fna    |
| 1311 | <i>Caldisericum exile</i>            | GCA_000284335.1_ASM28433v1_genomic.fna    |
| 1312 | <i>Oscillibacter valericigenes</i>   | GCA_000283575.1_ASM28357v1_genomic.fna    |
| 1313 | <i>Anabaena cylindrica</i>           | GCA_000317695.1_ASM31769v1_genomic.fna    |
| 1314 | <i>Pseudomonas viridiflava</i>       | GCA_900184295.1_Chr_1_genomic.fna         |
| 1315 | <i>Spiroplasma eriocheiris</i>       | GCA_001029265.1_ASM102926v1_genomic.fna   |
| 1316 | <i>Mycoplasma bovoculi</i>           | GCA_000524555.1_ASM52455v1_genomic.fna    |
| 1317 | <i>Mycoplasma flocculare</i>         | GCA_000815065.1_ASM81506v1_genomic.fna    |
| 1318 | <i>Moraxella bovoculi</i>            | GCA_000988605.1_ASM98860v1_genomic.fna    |
| 1319 | <i>Deinococcus gobiensis</i>         | GCA_000252445.1_ASM25244v1_genomic.fna    |
| 1320 | <i>Aequorivita sublithicola</i>      | GCA_000265385.1_ASM26538v1_genomic.fna    |
| 1321 | <i>Halobacteroides halobius</i>      | GCA_000328625.1_ASM32862v1_genomic.fna    |
| 1322 | <i>Burkholderia plantarii</i>        | GCA_001411805.1_ASM141180v1_genomic.fna   |
| 1323 | <i>Spiroplasma mirum</i>             | GCA_000565195.1_ASM56519v1_genomic.fna    |

|      |                                               |                                         |
|------|-----------------------------------------------|-----------------------------------------|
| 1324 | <i>Sphaerochaeta pleomorpha</i>               | GCA_000236685.1_ASM23668v1_genomic.fna  |
| 1325 | <i>Sphingobium indicum</i>                    | GCA_000264945.2_ASM26494v2_genomic.fna  |
| 1326 | <i>Herbaspirillum frisingense</i>             | GCA_002025725.1_ASM202572v1_genomic.fna |
| 1327 | <i>Xanthomonas hortorum</i>                   | GCA_002285515.1_ASM228551v1_genomic.fna |
| 1328 | <i>Belliella baltica</i>                      | GCA_000265405.1_ASM26540v1_genomic.fna  |
| 1329 | <i>Halobacillus halophilus</i>                | GCA_000284515.1_ASM28451v1_genomic.fna  |
| 1330 | <i>Turneriella parva</i>                      | GCA_000266885.1_ASM26688v1_genomic.fna  |
| 1331 | <i>Actinotignum schaalii</i>                  | GCA_000724605.1_ASM72460v1_genomic.fna  |
| 1332 | <i>Caldithrix abyssi</i>                      | GCA_001886815.1_ASM188681v1_genomic.fna |
| 1333 | <i>Spirochaeta africana</i>                   | GCA_000242595.3_ASM24259v3_genomic.fna  |
| 1334 | <i>Desulfomicrobium orale</i>                 | GCA_001553625.1_ASM155362v1_genomic.fna |
| 1335 | <i>Eubacterium sulci</i>                      | GCA_001189495.1_ASM118949v1_genomic.fna |
| 1336 | <i>Mycobacterium chubuense</i>                | GCA_000266905.1_ASM26690v1_genomic.fna  |
| 1337 | <i>Leclercia adecarboxylata</i>               | GCA_001518835.1_ASM151883v1_genomic.fna |
| 1338 | <i>Mycobacterium rhodesiae</i>                | GCA_000230895.3_ASM23089v3_genomic.fna  |
| 1339 | <i>Kitasatospora setae</i>                    | GCA_000269985.1_ASM26998v1_genomic.fna  |
| 1340 | <i>Emticicia oligotrophica</i>                | GCA_000263195.1_ASM26319v1_genomic.fna  |
| 1341 | <i>Alcanivorax dieselolei</i>                 | GCA_000300005.1_ASM30000v1_genomic.fna  |
| 1342 | <i>Acetobacterium woodii</i>                  | GCA_000247605.1_ASM24760v1_genomic.fna  |
| 1343 | <i>Thioflavicoccus mobilis</i>                | GCA_000327045.1_ASM32704v1_genomic.fna  |
| 1344 | <i>Clostridium saccharoperbutylacetonicum</i> | GCA_000340885.1_ASM34088v1_genomic.fna  |
| 1345 | <i>Ignavibacterium album</i>                  | GCA_000258405.1_ASM25840v1_genomic.fna  |
| 1346 | <i>Streptomyces cattleya</i>                  | GCA_000240165.1_ASM24016v1_genomic.fna  |
| 1347 | <i>Desulfosporosinus orientis</i>             | GCA_000235605.1_ASM23560v1_genomic.fna  |
| 1348 | <i>Dehalobacter restrictus</i>                | GCA_000512895.1_ASM51289v1_genomic.fna  |
| 1349 | <i>Neorhizobium galegae</i>                   | GCA_000731315.1_RG540_Ch_pA_genomic.fna |
| 1350 | <i>Enterococcus durans</i>                    | GCA_001267395.1_ASM126739v1_genomic.fna |
| 1351 | <i>Campylobacter lanienae</i>                 | GCA_002139935.1_ASM213993v1_genomic.fna |
| 1352 | <i>Campylobacter insulaenigrae</i>            | GCA_000816185.1_ASM81618v1_genomic.fna  |
| 1353 | <i>Campylobacter avium</i>                    | GCA_002238335.1_ASM223833v1_genomic.fna |
| 1354 | <i>Campylobacter helveticus</i>               | GCA_002080395.1_ASM208039v1_genomic.fna |
| 1355 | <i>Campylobacter cuniculorum</i>              | GCA_002104335.1_ASM210433v1_genomic.fna |
| 1356 | <i>Campylobacter hyointestinalis</i>          | GCA_001643955.1_ASM164395v1_genomic.fna |
| 1357 | <i>Campylobacter sputorum</i>                 | GCA_002220735.1_ASM222073v1_genomic.fna |



|      |                                              |                                         |
|------|----------------------------------------------|-----------------------------------------|
| 1358 | <i>Campylobacter volucris</i>                | GCA_000816345.1_ASM81634v1_genomic.fna  |
| 1359 | <i>Rhodococcus pyridinivorans</i>            | GCA_000511305.1_ASM51130v1_genomic.fna  |
| 1360 | <i>Flavobacterium columnare</i>              | GCA_000240075.2_ASM24007v2_genomic.fna  |
| 1361 | <i>Pseudoxanthomonas spadix</i>              | GCA_000233915.4_ASM23391v4_genomic.fna  |
| 1362 | <i>Leptospirillum ferriphilum</i>            | GCA_000299235.1_ASM29923v1_genomic.fna  |
| 1363 | <i>Leuconostoc carnosum</i>                  | GCA_000300135.1_ASM30013v1_genomic.fna  |
| 1364 | <i>Enterococcus mundtii</i>                  | GCA_000504125.1_ASM50412v1_genomic.fna  |
| 1365 | <i>Bacillus horikoshii</i>                   | GCA_002157855.1_ASM215785v1_genomic.fna |
| 1366 | <i>Streptococcus lutetiensis</i>             | GCA_000441535.1_ASM44153v1_genomic.fna  |
| 1367 | <i>Herbaspirillum rubrisubalbicans</i>       | GCA_001483945.1_ASM148394v1_genomic.fna |
| 1368 | <i>Clostridium clariflavum</i>               | GCA_000237085.1_ASM23708v1_genomic.fna  |
| 1369 | <i>Pelagibacterium halotolerans</i>          | GCA_000230555.1_ASM23055v1_genomic.fna  |
| 1370 | <i>Mesorhizobium amorphae</i>                | GCA_001686985.1_ASM168698v1_genomic.fna |
| 1371 | <i>Francisella persica</i>                   | GCA_001653955.1_ASM165395v1_genomic.fna |
| 1372 | <i>Exiguobacterium antarcticum</i>           | GCA_000299435.1_ASM29943v1_genomic.fna  |
| 1373 | <i>Mycoplasma wenyonii</i>                   | GCA_000277795.1_ASM27779v1_genomic.fna  |
| 1374 | <i>Carnobacterium maltaromaticum</i>         | GCA_000317975.2_ASM31797v2_genomic.fna  |
| 1375 | <i>Paenibacillus peoriae</i>                 | GCA_001272655.2_ASM127265v2_genomic.fna |
| 1376 | <i>Francisella noatunensis</i>               | GCA_000262205.1_ASM26220v1_genomic.fna  |
| 1377 | <i>Francisella hispaniensis</i>              | GCA_001885235.1_ASM188523v1_genomic.fna |
| 1378 | <i>Piscirickettsia salmonis</i>              | GCA_000300295.4_ASM30029v4_genomic.fna  |
| 1379 | <i>Methylobacterium alcaliphilum</i>         | GCA_000968535.1_ASM96853v1_genomic.fna  |
| 1380 | <i>Streptomyces xiamenensis</i>              | GCA_000993785.2_ASM99378v2_genomic.fna  |
| 1381 | <i>Flavobacterium indicum</i>                | GCA_000455605.1_GPTSA100-9_genomic.fna  |
| 1382 | <i>Leisingera methylohalidivorans</i>        | GCA_000511355.1_ASM51135v1_genomic.fna  |
| 1383 | <i>Thermocrinis ruber</i>                    | GCA_000512735.1_ASM51273v1_genomic.fna  |
| 1384 | <i>Rickettsia philipii</i>                   | GCA_000283995.1_ASM28399v1_genomic.fna  |
| 1385 | <i>Rickettsia parkeri</i>                    | GCA_000284195.1_ASM28419v1_genomic.fna  |
| 1386 | <i>Rickettsia australis</i>                  | GCA_000284155.1_ASM28415v1_genomic.fna  |
| 1387 | <i>Rickettsia montanensis</i>                | GCA_000284175.1_ASM28417v1_genomic.fna  |
| 1388 | <i>Rickettsia rhipicephali</i>               | GCA_000284075.1_ASM28407v1_genomic.fna  |
| 1389 | <i>Bartonella vinsonii</i>                   | GCA_000341385.1_ASM34138v1_genomic.fna  |
| 1390 | <i>Bartonella australis</i>                  | GCA_000341355.1_ASM34135v1_genomic.fna  |
| 1391 | <i>Thermoanaerobacterium saccharolyticum</i> | GCA_000307585.2_ASM30758v2_genomic.fna  |

|      |                                          |                                         |
|------|------------------------------------------|-----------------------------------------|
| 1392 | <i>Rhodoferrax antarcticus</i>           | GCA_001955735.1_ASM195573v1_genomic.fna |
| 1393 | <i>Mycoplasma haemocanis</i>             | GCA_000238995.1_ASM23899v1_genomic.fna  |
| 1394 | <i>Desulfurella acetivorans</i>          | GCA_000517565.1_ASM51756v1_genomic.fna  |
| 1395 | <i>Corynebacterium casei</i>             | GCA_000550785.1_ASM55078v1_genomic.fna  |
| 1396 | <i>Tistrella mobilis</i>                 | GCA_000264455.2_ASM26445v2_genomic.fna  |
| 1397 | <i>Pseudomonas psychrotolerans</i>       | GCA_001913135.1_ASM191313v1_genomic.fna |
| 1398 | <i>Gordonia polyisoprenivorans</i>       | GCA_000247715.1_ASM24771v1_genomic.fna  |
| 1399 | <i>Rhodococcus rhodochrous</i>           | GCA_900187265.1_52295_G01_genomic.fna   |
| 1400 | <i>Staphylococcus hyicus</i>             | GCA_000816085.1_ASM81608v1_genomic.fna  |
| 1401 | <i>Elizabethkingia anophelis</i>         | GCA_000495935.2_ASM49593v2_genomic.fna  |
| 1402 | <i>Simiduia agarivorans</i>              | GCA_000305785.2_ASM30578v2_genomic.fna  |
| 1403 | <i>Mycoplasma canis</i>                  | GCA_001553195.1_ASM155319v1_genomic.fna |
| 1404 | <i>Pseudoalteromonas arctica</i>         | GCA_000238395.4_ASM23839v4_genomic.fna  |
| 1405 | <i>Pseudoalteromonas marina</i>          | GCA_002407085.1_ASM240708v1_genomic.fna |
| 1406 | <i>Pseudoalteromonas piscicida</i>       | GCA_002208135.1_ASM220813v1_genomic.fna |
| 1407 | <i>Pseudoalteromonas rubra</i>           | GCA_001482385.1_ASM148238v1_genomic.fna |
| 1408 | <i>Pseudoalteromonas spongiae</i>        | GCA_000238255.4_ASM23825v4_genomic.fna  |
| 1409 | <i>Citrobacter farmeri</i>               | GCA_002249995.1_ASM224999v1_genomic.fna |
| 1410 | <i>Citrobacter werkmanii</i>             | GCA_002025225.1_ASM202522v1_genomic.fna |
| 1411 | <i>Novosphingobium pentaromativorans</i> | GCA_000767465.1_ASM76746v1_genomic.fna  |
| 1412 | <i>Pseudomonas monteilli</i>             | GCA_001534745.1_ASM153474v1_genomic.fna |
| 1413 | <i>Rothia aerea</i>                      | GCA_002355935.1_ASM235593v1_genomic.fna |
| 1414 | <i>Nocardia cyriacigeorgica</i>          | GCA_000284035.1_ASM28403v1_genomic.fna  |
| 1415 | <i>Gottschalkia acidurici</i>            | GCA_000299355.1_ASM29935v1_genomic.fna  |
| 1416 | <i>Rhizobium phaseoli</i>                | GCA_000172715.2_ASM17271v2_genomic.fna  |
| 1417 | <i>Cupriavidus basilensis</i>            | GCA_000832305.1_ASM83230v1_genomic.fna  |
| 1418 | <i>Pseudoalteromonas luteoviolacea</i>   | GCA_001750165.1_ASM175016v1_genomic.fna |
| 1419 | <i>Cronobacter malonaticus</i>           | GCA_000504545.1_ASM50454v1_genomic.fna  |
| 1420 | <i>Lactobacillus mucosae</i>             | GCA_000248095.3_ASM24809v3_genomic.fna  |
| 1421 | <i>Xanthomonas fragariae</i>             | GCA_001705565.1_ASM170556v1_genomic.fna |
| 1422 | <i>Thioalkalivibrio paradoxus</i>        | GCA_000227685.3_ASM22768v3_genomic.fna  |
| 1423 | <i>Advenella kashmirensis</i>            | GCA_000219915.3_ASM21991v3_genomic.fna  |
| 1424 | <i>Thermacetogenium phaeum</i>           | GCA_000305935.1_ASM30593v1_genomic.fna  |
| 1425 | <i>Paenibacillus terrae</i>              | GCA_000235585.1_ASM23558v1_genomic.fna  |

|      |                                     |                                         |
|------|-------------------------------------|-----------------------------------------|
| 1426 | <i>Megasphaera elsdenii</i>         | GCA_001304715.1_ASM130471v1_genomic.fna |
| 1427 | <i>Basilea psittacipulmonis</i>     | GCA_000743945.1_ASM74394v1_genomic.fna  |
| 1428 | <i>Gordonia terrae</i>              | GCA_001698225.1_ASM169822v1_genomic.fna |
| 1429 | <i>Streptococcus macedonicus</i>    | GCA_000283635.1_ASM28363v1_genomic.fna  |
| 1430 | <i>Pseudomonas fragi</i>            | GCA_001543265.1_ASM154326v1_genomic.fna |
| 1431 | <i>Nocardia brasiliensis</i>        | GCA_000250675.3_ASM25067v3_genomic.fna  |
| 1432 | <i>Wolbachia endosymbiont</i>       | GCA_000306885.1_ASM30688v1_genomic.fna  |
| 1433 | <i>Rubrivivax gelatinosus</i>       | GCA_000284255.1_ASM28425v1_genomic.fna  |
| 1434 | <i>Moraxella osloensis</i>          | GCA_001553955.1_ASM155395v1_genomic.fna |
| 1435 | <i>Sphingomonas melonis</i>         | GCA_001761345.1_ASM176134v1_genomic.fna |
| 1436 | <i>Corallococcus coralloides</i>    | GCA_000255295.1_ASM25529v1_genomic.fna  |
| 1437 | <i>Caldilinea aerophila</i>         | GCA_000281175.1_ASM28117v1_genomic.fna  |
| 1438 | <i>Amycolatopsis methanolica</i>    | GCA_000739085.1_ASM73908v1_genomic.fna  |
| 1439 | <i>Geobacillus thermoleovorans</i>  | GCA_001610955.1_ASM161095v1_genomic.fna |
| 1440 | <i>Marinovum algicola</i>           | GCA_001046955.1_ASM104695v1_genomic.fna |
| 1441 | <i>Thermus oshimai</i>              | GCA_000309885.1_ASM30988v1_genomic.fna  |
| 1442 | <i>Anaerotignum propionicum</i>     | GCA_001561955.1_ASM156195v1_genomic.fna |
| 1443 | <i>Sulfurospirillum barnesii</i>    | GCA_000265295.1_ASM26529v1_genomic.fna  |
| 1444 | <i>Opitutaceae bacterium</i>        | GCA_000242935.3_ASM24293v3_genomic.fna  |
| 1445 | <i>Frateuria aurantia</i>           | GCA_000242255.3_ASM24225v3_genomic.fna  |
| 1446 | <i>Burkholderia seminalis</i>       | GCA_001718535.1_ASM171853v1_genomic.fna |
| 1447 | <i>Solibacillus silvestris</i>      | GCA_001586195.1_ASM158619v1_genomic.fna |
| 1448 | <i>Fimbriimonas ginsengisoli</i>    | GCA_000724625.1_ASM72462v1_genomic.fna  |
| 1449 | <i>Photorhabdus temperata</i>       | GCA_001010285.1_ASM101028v1_genomic.fna |
| 1450 | <i>Pseudomonas chlororaphis</i>     | GCA_000698865.1_ASM69886v1_genomic.fna  |
| 1451 | <i>Campylobacter ureolyticus</i>    | GCA_001190755.1_ASM119075v1_genomic.fna |
| 1452 | <i>Barnesiella viscericola</i>      | GCA_000512915.1_ASM51291v1_genomic.fna  |
| 1453 | <i>Bernardetia litoralis</i>        | GCA_000265505.1_ASM26550v1_genomic.fna  |
| 1454 | <i>Phycisphaera mikurensis</i>      | GCA_000284115.1_ASM28411v1_genomic.fna  |
| 1455 | <i>Bifidobacterium asteroides</i>   | GCA_000304215.1_ASM30421v1_genomic.fna  |
| 1456 | <i>Blastococcus saxosidens</i>      | GCA_000284015.1_ASM28401v1_genomic.fna  |
| 1457 | <i>Pseudomonas mandelii</i>         | GCA_000257545.3_ASM25754v3_genomic.fna  |
| 1458 | <i>Pelosinus fermentans</i>         | GCA_000271665.2_ASM27166v2_genomic.fna  |
| 1459 | <i>Sulfurospirillum multivorans</i> | GCA_000568815.1_ASM56881v1_genomic.fna  |

|      |                                               |                                          |
|------|-----------------------------------------------|------------------------------------------|
| 1460 | <i>Pararhodospirillum photometricum</i>       | GCA_000284415.2_ASM28441v2_genomic.fna   |
| 1461 | <i>Serratia plymuthica</i>                    | GCA_000176835.2_ASM17683v2_genomic.fna   |
| 1462 | <i>Amycolatopsis orientalis</i>               | GCA_000400635.2_ASM40063v2_genomic.fna   |
| 1463 | <i>Methylococcus thermophilus</i>             | GCA_000953475.1_MfumSolVChr1_genomic.fna |
| 1464 | <i>Alcaligenes faecalis</i>                   | GCA_000967305.2_ASM96730v2_genomic.fna   |
| 1465 | <i>Phaeobacter inhibens</i>                   | GCA_000154745.2_ASM15474v2_genomic.fna   |
| 1466 | <i>Cronobacter dublinensis</i>                | GCA_001277235.1_ASM127723v1_genomic.fna  |
| 1467 | <i>Cronobacter universalis</i>                | GCA_001277175.1_ASM127717v1_genomic.fna  |
| 1468 | <i>Mycobacterium haemophilum</i>              | GCA_000340435.3_ASM34043v3_genomic.fna   |
| 1469 | <i>Alteromonas stellipolaris</i>              | GCA_001562115.1_ASM156211v1_genomic.fna  |
| 1470 | <i>Staphylococcus equorum</i>                 | GCA_001432245.1_ASM143224v1_genomic.fna  |
| 1471 | <i>Paraburkholderia caribensis</i>            | GCA_000522545.2_ASM52254v2_genomic.fna   |
| 1472 | <i>Cronobacter muytjensii</i>                 | GCA_001277195.1_ASM127719v1_genomic.fna  |
| 1473 | <i>Cronobacter condimenti</i>                 | GCA_001277255.1_ASM127725v1_genomic.fna  |
| 1474 | <i>Helicobacter cetorum</i>                   | GCA_000259275.1_ASM25927v1_genomic.fna   |
| 1475 | <i>Desulfovibrio alaskensis</i>               | GCA_000012665.1_ASM1266v1_genomic.fna    |
| 1476 | <i>Pseudomonas knackmussii</i>                | GCA_000689415.1_PKB13_genomic.fna        |
| 1477 | <i>Desulfocapsa sulfexigens</i>               | GCA_000341395.1_ASM34139v1_genomic.fna   |
| 1478 | <i>Actinosynnema pretiosum</i>                | GCA_002354875.1_ASM235487v1_genomic.fna  |
| 1479 | <i>Actinoplanes missouriensis</i>             | GCA_000284295.1_ASM28429v1_genomic.fna   |
| 1480 | <i>Lactococcus piscium</i>                    | GCA_000981525.1_L_piscium_genomic.fna    |
| 1481 | <i>Mycobacterium phlei</i>                    | GCA_001583415.1_ASM158341v1_genomic.fna  |
| 1482 | <i>Acidipropionibacterium acidipropionici</i> | GCA_001441165.1_ASM144116v1_genomic.fna  |
| 1483 | <i>Leptolyngbya boryana</i>                   | GCA_002142495.1_ASM214249v1_genomic.fna  |
| 1484 | <i>Streptomyces globisporus</i>               | GCA_000261345.2_ASM26134v2_genomic.fna   |
| 1485 | <i>Cyanobium gracile</i>                      | GCA_000316515.1_ASM31651v1_genomic.fna   |
| 1486 | <i>Dactylococcopsis salina</i>                | GCA_000317615.1_ASM31761v1_genomic.fna   |
| 1487 | <i>Oscillatoria acuminata</i>                 | GCA_000317105.1_ASM31710v1_genomic.fna   |
| 1488 | <i>Crinalium epipsammum</i>                   | GCA_000317495.1_ASM31749v1_genomic.fna   |
| 1489 | <i>Staniera cyanosphaera</i>                  | GCA_000317575.1_ASM31757v1_genomic.fna   |
| 1490 | <i>Bordetella holmesii</i>                    | GCA_000612485.1_ASM61248v1_genomic.fna   |
| 1491 | <i>Kosakonia radicincitans</i>                | GCA_000280495.2_ASM28049v2_genomic.fna   |
| 1492 | <i>Thalassospira xiamenensis</i>              | GCA_000300235.2_ASM30023v2_genomic.fna   |
| 1493 | <i>Bacillus altitudinis</i>                   | GCA_002443015.1_ASM244301v1_genomic.fna  |

|      |                                        |                                         |
|------|----------------------------------------|-----------------------------------------|
| 1494 | <i>Bacillus safensis</i>               | GCA_001895885.1_ASM189588v1_genomic.fna |
| 1495 | <i>Agrobacterium fabrum</i>            | GCA_000092025.1_ASM9202v1_genomic.fna   |
| 1496 | <i>Bdellovibrio exovorus</i>           | GCA_000348725.1_ASM34872v1_genomic.fna  |
| 1497 | <i>Granulicella tundricola</i>         | GCA_000178975.2_ASM17897v2_genomic.fna  |
| 1498 | <i>Planococcus antarcticus</i>         | GCA_001687565.2_ASM168756v2_genomic.fna |
| 1499 | <i>Mycoplasma arginini</i>             | GCA_001547975.1_ASM154797v1_genomic.fna |
| 1500 | <i>Vibrio breoganii</i>                | GCA_001677275.1_ASM167727v1_genomic.fna |
| 1501 | <i>Rhodovulum sulfidophilum</i>        | GCA_001633165.1_ASM163316v1_genomic.fna |
| 1502 | <i>Myxococcus macrosporus</i>          | GCA_002305895.1_ASM230589v1_genomic.fna |
| 1503 | <i>Vibrio tasmaniensis</i>             | GCA_000091465.1_ASM9146v1_genomic.fna   |
| 1504 | <i>Melioribacter roseus</i>            | GCA_000279145.1_ASM27914v1_genomic.fna  |
| 1505 | <i>Granulosicoccus antarcticus</i>     | GCA_002215215.1_ASM221521v1_genomic.fna |
| 1506 | <i>Sulfurospirillum halorespirans</i>  | GCA_001723605.1_ASM172360v1_genomic.fna |
| 1507 | <i>Pseudomonas alcaliphila</i>         | GCA_001941865.1_ASM194186v1_genomic.fna |
| 1508 | <i>Mycobacterium vaccae</i>            | GCA_001655245.1_ASM165524v1_genomic.fna |
| 1509 | <i>Xanthomonas translucens</i>         | GCA_001021935.1_ASM102193v1_genomic.fna |
| 1510 | <i>Snodgrassella alvi</i>              | GCA_000600005.1_ASM60000v1_genomic.fna  |
| 1511 | <i>Virgibacillus halodenitrificans</i> | GCA_001878675.1_ASM187867v1_genomic.fna |
| 1512 | <i>Bacillus endophyticus</i>           | GCA_000972245.3_ASM97224v3_genomic.fna  |
| 1513 | <i>Bacillus oceanisediminis</i>        | GCA_000294775.2_ASM29477v2_genomic.fna  |
| 1514 | <i>Corynebacterium terpenotabidum</i>  | GCA_000418365.1_ASM41836v1_genomic.fna  |
| 1515 | <i>Corynebacterium doosanense</i>      | GCA_000767055.1_ASM76705v1_genomic.fna  |
| 1516 | <i>Nocardiopsis alba</i>               | GCA_000294515.1_ASM29451v1_genomic.fna  |
| 1517 | <i>Rhizobium gallicum</i>              | GCA_000816845.1_ASM81684v1_genomic.fna  |
| 1518 | <i>Martelella mediterranea</i>         | GCA_002043005.1_ASM204300v1_genomic.fna |
| 1519 | <i>Sulfuricella denitrificans</i>      | GCA_000297055.2_ASM29705v2_genomic.fna  |
| 1520 | <i>Aeromonas media</i>                 | GCA_000287215.3_ASM28721v3_genomic.fna  |
| 1521 | <i>Thalassolituus oleivorans</i>       | GCA_000355675.1_ASM35567v1_genomic.fna  |
| 1522 | <i>Clostridium tyrobutyricum</i>       | GCA_001642655.1_ASM164265v1_genomic.fna |
| 1523 | <i>Burkholderia pyrrocinia</i>         | GCA_001028665.1_ASM102866v1_genomic.fna |
| 1524 | <i>Nocardia nova</i>                   | GCA_000523235.1_ASM52323v1_genomic.fna  |
| 1525 | <i>Nocardia seriolae</i>               | GCA_001865855.1_ASM186585v1_genomic.fna |
| 1526 | <i>Nocardia soli</i>                   | GCA_001886715.1_ASM188671v1_genomic.fna |
| 1527 | <i>Planococcus halocryophilus</i>      | GCA_001687585.2_ASM168758v2_genomic.fna |

|      |                                       |                                         |
|------|---------------------------------------|-----------------------------------------|
| 1528 | <i>Mycobacterium fortuitum</i>        | GCA_001307545.1_ASM130754v1_genomic.fna |
| 1529 | <i>Pseudomonas alcaligenes</i>        | GCA_001597285.1_ASM159728v1_genomic.fna |
| 1530 | <i>Pseudomonas azotoformans</i>       | GCA_001579805.1_ASM157980v1_genomic.fna |
| 1531 | <i>Pseudomonas citronellolis</i>      | GCA_001654435.1_ASM165443v1_genomic.fna |
| 1532 | <i>Pseudomonas cremoricolorata</i>    | GCA_000759535.1_ASM75953v1_genomic.fna  |
| 1533 | <i>Pseudomonas oryzihabitans</i>      | GCA_001518815.1_ASM151881v1_genomic.fna |
| 1534 | <i>Pseudomonas parafulva</i>          | GCA_000800255.1_ASM80025v1_genomic.fna  |
| 1535 | <i>Pseudomonas plecoglossicida</i>    | GCA_000831585.1_ASM83158v1_genomic.fna  |
| 1536 | <i>Edwardsiella hoshinae</i>          | GCA_001761405.1_ASM176140v1_genomic.fna |
| 1537 | <i>Elizabethkingia meningoseptica</i> | GCA_002022105.1_ASM202210v1_genomic.fna |
| 1538 | <i>Cedecea neteri</i>                 | GCA_000757825.1_ASM75782v1_genomic.fna  |
| 1539 | <i>Paraburkholderia fungorum</i>      | GCA_000961515.1_ASM96151v1_genomic.fna  |
| 1540 | <i>Serratia rubidaea</i>              | GCA_001572725.1_ASM157272v1_genomic.fna |
| 1541 | <i>Kluyvera intermedia</i>            | GCA_001022135.1_ASM102213v1_genomic.fna |
| 1542 | <i>Sphingopyxis macrogoltabida</i>    | GCA_001314325.1_ASM131432v1_genomic.fna |
| 1543 | <i>Sphingobium herbicidovorans</i>    | GCA_002080435.1_ASM208043v1_genomic.fna |
| 1544 | <i>Sphingomonas koreensis</i>         | GCA_001922385.1_ASM192238v1_genomic.fna |
| 1545 | <i>Sphingopyxis terrae</i>            | GCA_001610975.1_ASM161097v1_genomic.fna |
| 1546 | <i>Sphingopyxis granuli</i>           | GCA_001559015.1_ASM155901v1_genomic.fna |
| 1547 | <i>Vibrio natriegens</i>              | GCA_001456255.1_ASM145625v1_genomic.fna |
| 1548 | <i>Vibrio gazogenes</i>               | GCA_002196515.1_ASM219651v1_genomic.fna |
| 1549 | <i>Pseudothromotoga elfii</i>         | GCA_000504085.1_ASM50408v1_genomic.fna  |
| 1550 | <i>Pluralibacter gergoviae</i>        | GCA_000757785.1_ASM75778v1_genomic.fna  |
| 1551 | <i>Pseudothromotoga hypogea</i>       | GCA_000816145.1_ASM81614v1_genomic.fna  |
| 1552 | <i>Lelliottia amnigena</i>            | GCA_001652505.2_ASM165250v2_genomic.fna |
| 1553 | <i>Delftia tsuruhatensis</i>          | GCA_001753225.1_ASM175322v1_genomic.fna |
| 1554 | <i>Bacillus krulwichiae</i>           | GCA_002109385.1_ASM210938v1_genomic.fna |
| 1555 | <i>Bacillus sonorensis</i>            | GCA_002202015.1_ASM220201v1_genomic.fna |
| 1556 | <i>Acinetobacter schindleri</i>       | GCA_001971565.1_ASM197156v1_genomic.fna |
| 1557 | <i>Legionella fallonii</i>            | GCA_000953135.1_LFA_genomic.fna         |
| 1558 | <i>Corynebacterium marinum</i>        | GCA_000835165.1_ASM83516v1_genomic.fna  |
| 1559 | <i>Corynebacterium maris</i>          | GCA_000442645.1_ASM44264v1_genomic.fna  |
| 1560 | <i>Corynebacterium humireducens</i>   | GCA_000819445.1_ASM81944v1_genomic.fna  |
| 1561 | <i>Corynebacterium vitaeruminis</i>   | GCA_000550805.1_ASM55080v1_genomic.fna  |

|      |                                         |                                         |
|------|-----------------------------------------|-----------------------------------------|
| 1562 | <i>Dickeya solani</i>                   | GCA_001644705.1_ASM164470v1_genomic.fna |
| 1563 | <i>Thioalkalivibrio versutus</i>        | GCA_001020955.1_ASM102095v1_genomic.fna |
| 1564 | <i>Paraburkholderia phenoliruptrix</i>  | GCA_000300095.1_ASM30009v1_genomic.fna  |
| 1565 | <i>Paraglaciecola psychrophila</i>      | GCA_000347635.1_ASM34763v1_genomic.fna  |
| 1566 | <i>Kocuria palustris</i>                | GCA_001275345.1_ASM127534v1_genomic.fna |
| 1567 | <i>Pseudomonas protegens</i>            | GCA_000397205.1_ASM39720v1_genomic.fna  |
| 1568 | <i>Leptospira alstonii</i>              | GCA_001729245.1_ASM172924v1_genomic.fna |
| 1569 | <i>Octadecabacter arcticus</i>          | GCA_000155735.2_ASM15573v2_genomic.fna  |
| 1570 | <i>Staphylococcus pettenkoferi</i>      | GCA_002208805.1_ASM220880v1_genomic.fna |
| 1571 | <i>Moorea producens</i>                 | GCA_001767235.1_ASM176723v1_genomic.fna |
| 1572 | <i>Pseudomonas resinovorans</i>         | GCA_000412695.1_ASM41269v1_genomic.fna  |
| 1573 | <i>Actinoplanes friuliensis</i>         | GCA_000494755.1_ASM49475v1_genomic.fna  |
| 1574 | <i>Streptomyces collinus</i>            | GCA_000444875.1_ASM44487v1_genomic.fna  |
| 1575 | <i>Thioalkalivibrio nitratireducens</i> | GCA_000321415.2_ASM32141v2_genomic.fna  |
| 1576 | <i>Achromobacter denitrificans</i>      | GCA_001514355.1_ASM151435v1_genomic.fna |
| 1577 | <i>Clostridium stercorarium</i>         | GCA_000331995.1_ASM33199v1_genomic.fna  |
| 1578 | <i>Citrobacter amalonaticus</i>         | GCA_000981805.1_ASM98180v1_genomic.fna  |
| 1579 | <i>Bibersteinia trehalosi</i>           | GCA_000347595.1_ASM34759v1_genomic.fna  |
| 1580 | <i>Herbaspirillum hiltneri</i>          | GCA_001267925.1_ASM126792v1_genomic.fna |
| 1581 | <i>Mycobacterium neoaurum</i>           | GCA_000317305.3_ASM31730v3_genomic.fna  |
| 1582 | <i>Oscillatoria nigro-viridis</i>       | GCA_000317475.1_ASM31747v1_genomic.fna  |
| 1583 | <i>Nitrosospora briensis</i>            | GCA_000619905.2_ASM61990v2_genomic.fna  |
| 1584 | <i>Cyanobacterium aponinum</i>          | GCA_000317675.1_ASM31767v1_genomic.fna  |
| 1585 | <i>Streptococcus oralis</i>             | GCA_002356415.1_ASM235641v1_genomic.fna |
| 1586 | <i>Lactococcus raffinolactis</i>        | GCA_002310475.1_ASM231047v1_genomic.fna |
| 1587 | <i>Acinetobacter soli</i>               | GCA_001953195.1_ASM195319v1_genomic.fna |
| 1588 | <i>Mycoplasma cynos</i>                 | GCA_000328725.1_ASM32872v1_genomic.fna  |
| 1589 | <i>Rickettsia monacensis</i>            | GCA_000499665.2_RMONA_1_genomic.fna     |
| 1590 | <i>Tepidanaerobacter acetatoxydans</i>  | GCA_000328765.2_ASM32876v2_genomic.fna  |
| 1591 | <i>Liberibacter crescens</i>            | GCA_000325745.1_ASM32574v1_genomic.fna  |
| 1592 | <i>Saccharothrix espanaensis</i>        | GCA_000328705.1_ASM32870v1_genomic.fna  |
| 1593 | <i>Serratia liquefaciens</i>            | GCA_000422085.1_ASM42208v1_genomic.fna  |
| 1594 | <i>Raoultella ornithinolytica</i>       | GCA_000367425.1_ASM36742v1_genomic.fna  |
| 1595 | <i>Corynebacterium flavesens</i>        | GCA_001941465.1_ASM194146v1_genomic.fna |

|      |                                      |                                         |
|------|--------------------------------------|-----------------------------------------|
| 1596 | <i>Stenotrophomonas rhizophila</i>   | GCA_001704155.1_ASM170415v1_genomic.fna |
| 1597 | <i>Corynebacterium stationis</i>     | GCA_001941345.1_ASM194134v1_genomic.fna |
| 1598 | <i>Lactobacillus crustorum</i>       | GCA_001951175.1_ASM195117v1_genomic.fna |
| 1599 | <i>Weissella ceti</i>                | GCA_000750535.1_ASM75053v1_genomic.fna  |
| 1600 | <i>Spiroplasma taiwanense</i>        | GCA_000439435.1_ASM43943v1_genomic.fna  |
| 1601 | <i>Spiroplasma diminutum</i>         | GCA_000439455.1_ASM43945v1_genomic.fna  |
| 1602 | <i>Spiroplasma chrysopicola</i>      | GCA_000400935.1_ASM40093v1_genomic.fna  |
| 1603 | <i>Spiroplasma syrphidicola</i>      | GCA_000400955.1_ASM40095v1_genomic.fna  |
| 1604 | <i>Spiroplasma culicicola</i>        | GCA_000565175.1_ASM56517v1_genomic.fna  |
| 1605 | <i>Spiroplasma sabaudiense</i>       | GCA_000565215.1_ASM56521v1_genomic.fna  |
| 1606 | <i>Spiroplasma apis</i>              | GCA_000500935.1_ASM50093v1_genomic.fna  |
| 1607 | <i>Ruegeria mobilis</i>              | GCA_000376545.2_ASM37654v2_genomic.fna  |
| 1608 | <i>Myxococcus stipitatus</i>         | GCA_000331735.1_ASM33173v1_genomic.fna  |
| 1609 | <i>Corynebacterium callunae</i>      | GCA_000344785.1_ASM34478v1_genomic.fna  |
| 1610 | <i>Bifidobacterium pseudolongum</i>  | GCA_000800475.2_ASM80047v2_genomic.fna  |
| 1611 | <i>Pannonibacter phragmitetus</i>    | GCA_001484065.1_ASM148406v1_genomic.fna |
| 1612 | <i>Neorickettsia helminthoeca</i>    | GCA_000632985.1_ASM63298v1_genomic.fna  |
| 1613 | <i>Lysobacter antibioticus</i>       | GCA_001442535.1_ASM144253v1_genomic.fna |
| 1614 | <i>Streptomyces albulus</i>          | GCA_000695235.1_ASM69523v1_genomic.fna  |
| 1615 | <i>Mannheimia varigena</i>           | GCA_000521655.1_ASM52165v1_genomic.fna  |
| 1616 | <i>Staphylococcus pasteurii</i>      | GCA_000494875.1_ASM49487v1_genomic.fna  |
| 1617 | <i>Trueperella pyogenes</i>          | GCA_000612055.1_ASM61205v1_genomic.fna  |
| 1618 | <i>Streptomyces violaceoruber</i>    | GCA_002082175.1_ASM208217v1_genomic.fna |
| 1619 | <i>Streptomyces laurentii</i>        | GCA_002355495.1_ASM235549v1_genomic.fna |
| 1620 | <i>Sporosarcina ureae</i>            | GCA_002082015.1_ASM208201v1_genomic.fna |
| 1621 | <i>Roseovarius mucosus</i>           | GCA_002080415.1_ASM208041v1_genomic.fna |
| 1622 | <i>Pseudomonas poae</i>              | GCA_000336465.1_ASM33646v1_genomic.fna  |
| 1623 | <i>Aerococcus urinaeequi</i>         | GCA_001518795.1_ASM151879v1_genomic.fna |
| 1624 | <i>Brevundimonas naejangsanensis</i> | GCA_000635915.2_ASM63591v2_genomic.fna  |
| 1625 | <i>Rathayibacter toxicus</i>         | GCA_001465855.1_ASM146585v1_genomic.fna |
| 1626 | <i>Treponema pedis</i>               | GCA_000447675.1_ASM44767v1_genomic.fna  |
| 1627 | <i>Borrelia miyamotoi</i>            | GCA_000445425.4_ASM44542v4_genomic.fna  |
| 1628 | <i>Photobacterium gaetbulicola</i>   | GCA_000940995.1_ASM94099v1_genomic.fna  |
| 1629 | <i>Melittangium boletus</i>          | GCA_002305855.1_ASM230585v1_genomic.fna |



|      |                                         |                                         |
|------|-----------------------------------------|-----------------------------------------|
| 1630 | <i>Mycobacterium yongonense</i>         | GCA_000418535.2_ASM41853v2_genomic.fna  |
| 1631 | <i>Dokdonella koreensis</i>             | GCA_001632775.1_ASM163277v1_genomic.fna |
| 1632 | <i>Isoptericola dokdonensis</i>         | GCA_001636295.1_ASM163629v1_genomic.fna |
| 1633 | <i>Bradyrhizobium oligotrophicum</i>    | GCA_000344805.1_ASM34480v1_genomic.fna  |
| 1634 | <i>Nocardioides dokdonensis</i>         | GCA_001653335.1_ASM165333v1_genomic.fna |
| 1635 | <i>Streptomyces fulvissimus</i>         | GCA_000385945.1_ASM38594v1_genomic.fna  |
| 1636 | <i>Pseudoalteromonas agarivorans</i>    | GCA_002310855.1_ASM231085v1_genomic.fna |
| 1637 | <i>Ilumatobacter coccineus</i>          | GCA_000348785.1_ASM34878v1_genomic.fna  |
| 1638 | <i>Pseudomonas veronii</i>              | GCA_002028325.1_ASM202832v1_genomic.fna |
| 1639 | <i>Bacillus flexus</i>                  | GCA_002024265.1_ASM202426v1_genomic.fna |
| 1640 | <i>Cupriavidus gilardii</i>             | GCA_001281465.1_ASM128146v1_genomic.fna |
| 1641 | <i>Plesiomonas shigelloides</i>         | GCA_900087055.1_31289_E01_genomic.fna   |
| 1642 | <i>Variovorax boronicumulus</i>         | GCA_002291405.1_ASM229140v1_genomic.fna |
| 1643 | <i>Rathayibacter tritici</i>            | GCA_001641005.1_ASM164100v1_genomic.fna |
| 1644 | <i>Azotobacter chroococcum</i>          | GCA_000817975.1_ASM81797v1_genomic.fna  |
| 1645 | <i>Cycloclasticus zancles</i>           | GCA_000442595.1_ASM44259v1_genomic.fna  |
| 1646 | <i>Bordetella hinzii</i>                | GCA_001078275.1_ASM107827v1_genomic.fna |
| 1647 | <i>Serratia fonticola</i>               | GCA_001006005.1_ASM100600v1_genomic.fna |
| 1648 | <i>Paenibacillus durus</i>              | GCA_000756615.1_ASM75661v1_genomic.fna  |
| 1649 | <i>Vibrio owensii</i>                   | GCA_002021755.1_ASM202175v1_genomic.fna |
| 1650 | <i>Paenibacillus graminis</i>           | GCA_000758705.1_ASM75870v1_genomic.fna  |
| 1651 | <i>Enterobacter lignolyticus</i>        | GCA_000164865.1_ASM16486v1_genomic.fna  |
| 1652 | <i>Burkholderia contaminans</i>         | GCA_001029145.1_ASM102914v1_genomic.fna |
| 1653 | <i>Spiribacter salinus</i>              | GCA_000319575.2_ASM31957v2_genomic.fna  |
| 1654 | <i>Thermodesulfobacterium geofontis</i> | GCA_000215975.1_ASM21597v1_genomic.fna  |
| 1655 | <i>Clostridium autoethanogenum</i>      | GCA_000484505.1_ASM48450v1_genomic.fna  |
| 1656 | <i>Clostridium saccharobutylicum</i>    | GCA_000473995.1_ASM47399v1_genomic.fna  |
| 1657 | <i>Roseomonas gilardii</i>              | GCA_001941945.1_ASM194194v1_genomic.fna |
| 1658 | <i>Sphingobium baderi</i>               | GCA_001456115.1_ASM145611v1_genomic.fna |
| 1659 | <i>Corynebacterium argentoratense</i>   | GCA_000590555.1_ASM59055v1_genomic.fna  |
| 1660 | <i>Cellulophaga baltica</i>             | GCA_000468615.2_ASM46861v2_genomic.fna  |
| 1661 | <i>Microbulbifer agarilyticus</i>       | GCA_001999945.1_ASM199994v1_genomic.fna |
| 1662 | <i>Bradyrhizobium diazoefficiens</i>    | GCA_000011365.1_ASM1136v1_genomic.fna   |
| 1663 | <i>Clostridium chauvoei</i>             | GCA_900168365.1_JF4335_genomic.fna      |

|      |                                       |                                         |
|------|---------------------------------------|-----------------------------------------|
| 1664 | <i>Campylobacter subantarcticus</i>   | GCA_000816265.1_ASM81626v1_genomic.fna  |
| 1665 | <i>Adlercreutzia equolifaciens</i>    | GCA_000478885.1_ASM47888v1_genomic.fna  |
| 1666 | <i>Desulfococcus multivorans</i>      | GCA_001854245.1_ASM185424v1_genomic.fna |
| 1667 | <i>Pragia fontium</i>                 | GCA_001026985.1_ASM102698v1_genomic.fna |
| 1668 | <i>Pseudomonas mosselii</i>           | GCA_000498975.2_ASM49897v2_genomic.fna  |
| 1669 | <i>Yersinia similis</i>               | GCA_000582515.1_ASM58251v1_genomic.fna  |
| 1670 | <i>Streptomyces lydicus</i>           | GCA_001729485.1_ASM172948v1_genomic.fna |
| 1671 | <i>Bacillus infantis</i>              | GCA_000473245.1_ASM47324v1_genomic.fna  |
| 1672 | <i>Acholeplasma brassicae</i>         | GCA_000967915.1_ASM96791v1_genomic.fna  |
| 1673 | <i>Acholeplasma palmae</i>            | GCA_000968055.1_ASM96805v1_genomic.fna  |
| 1674 | <i>Mycoplasma parvum</i>              | GCA_000477415.1_ASM47741v1_genomic.fna  |
| 1675 | <i>Bacillus toyonensis</i>            | GCA_000496285.1_ASM49628v1_genomic.fna  |
| 1676 | <i>Capnocytophaga haemolytica</i>     | GCA_001553545.1_ASM155354v1_genomic.fna |
| 1677 | <i>Streptomyces niveus</i>            | GCA_002009175.1_ASM200917v1_genomic.fna |
| 1678 | <i>Hyphomicrobium nitrativorans</i>   | GCA_000503895.1_ASM50389v1_genomic.fna  |
| 1679 | <i>Pandoraea pnumenusa</i>            | GCA_000767615.3_ASM76761v3_genomic.fna  |
| 1680 | <i>Ehrlichia muris</i>                | GCA_000508225.1_ASM50822v1_genomic.fna  |
| 1681 | <i>Mycoplasma ovis</i>                | GCA_000508245.1_ASM50824v1_genomic.fna  |
| 1682 | <i>Legionella oakridgensis</i>        | GCA_000512355.1_ASM51235v1_genomic.fna  |
| 1683 | <i>Sphingomonas sanxanigenens</i>     | GCA_000512205.2_ASM51220v2_genomic.fna  |
| 1684 | <i>Bifidobacterium kashiwanohense</i> | GCA_000800455.1_ASM80045v1_genomic.fna  |
| 1685 | <i>Kosakonia sacchari</i>             | GCA_000300455.4_ASM30045v4_genomic.fna  |
| 1686 | <i>Aeromonas dhakensis</i>            | GCA_002285935.1_ASM228593v1_genomic.fna |
| 1687 | <i>Chlamydia gallinacea</i>           | GCA_000471025.2_ASM47102v2_genomic.fna  |
| 1688 | <i>Borrelia anserina</i>              | GCA_001936255.1_ASM193625v1_genomic.fna |
| 1689 | <i>Borrelia parkeri</i>               | GCA_000512145.2_ASM51214v2_genomic.fna  |
| 1690 | <i>Komagataeibacter medellinensis</i> | GCA_000182745.1_ASM18274v1_genomic.fna  |
| 1691 | <i>Cardinium endosymbiont</i>         | GCA_000304455.1_CCh_cEper1_genomic.fna  |
| 1692 | <i>Modestobacter marinus</i>          | GCA_000306785.1_ASM30678v1_genomic.fna  |
| 1693 | <i>Enterobacteriaceae bacterium</i>   | GCA_000330845.1_ASM33084v1_genomic.fna  |
| 1694 | <i>beta proteobacterium</i>           | GCA_000342265.1_ASM34226v1_genomic.fna  |
| 1695 | <i>Burkholderia lata</i>              | GCA_000012945.1_ASM1294v1_genomic.fna   |
| 1696 | <i>Magnetococcus marinus</i>          | GCA_000014865.1_ASM1486v1_genomic.fna   |
| 1697 | <i>Mycobacterium gilvum</i>           | GCA_000016365.1_ASM1636v1_genomic.fna   |

|      |                                         |                                              |
|------|-----------------------------------------|----------------------------------------------|
| 1698 | <i>Geobacter daltonii</i>               | GCA_000022265.1_ASM2226v1_genomic.fna        |
| 1699 | <i>Bordetella trematum</i>              | GCA_900078695.1_H044680328_genomic.fna       |
| 1700 | <i>Paraburkholderia sprentiae</i>       | GCA_001865575.1_ASM186557v1_genomic.fna      |
| 1701 | <i>Gloeobacter kilauensis</i>           | GCA_000484535.1_ASM48453v1_genomic.fna       |
| 1702 | <i>Alcanivorax pacificus</i>            | GCA_000299335.2_ASM29933v2_genomic.fna       |
| 1703 | <i>Bacteroides bacterium</i>            | GCA_000473305.1_ASM47330v1_genomic.fna       |
| 1704 | <i>Methylophaga frappieri</i>           | GCA_000260965.1_ASM26096v1_genomic.fna       |
| 1705 | <i>Methylophaga nitratireducens</i>     | GCA_000260985.3_ASM26098v3_genomic.fna       |
| 1706 | <i>Rhodanobacter denitrificans</i>      | GCA_000230695.3_ASM23069v3_genomic.fna       |
| 1707 | <i>Bacillus velezensis</i>              | GCA_000015785.1_ASM1578v1_genomic.fna        |
| 1708 | <i>Pseudomonas cichorii</i>             | GCA_000517305.1_ASM51730v1_genomic.fna       |
| 1709 | <i>Pseudomonas corrugata</i>            | GCA_001708425.1_ASM170842v1_genomic.fna      |
| 1710 | <i>Gemmatirosa kalamazoonesis</i>       | GCA_000522985.1_ASM52298v1_genomic.fna       |
| 1711 | <i>Kutzneria albida</i>                 | GCA_000525635.1_ASM52563v1_genomic.fna       |
| 1712 | <i>Corynebacterium falsenii</i>         | GCA_000525655.1_ASM52565v1_genomic.fna       |
| 1713 | <i>Hymenobacter swuensis</i>            | GCA_000576555.1_ASM57655v1_genomic.fna       |
| 1714 | <i>Clostridium cellulosi</i>            | GCA_000953215.1_DG5_genomic.fna              |
| 1715 | <i>Ensifer adhaerens</i>                | GCA_000697965.2_ASM69796v2_genomic.fna       |
| 1716 | <i>Chlamydia avium</i>                  | GCA_000583875.1_ASM58387v1_genomic.fna       |
| 1717 | <i>Roseibacterium elongatum</i>         | GCA_000590925.1_ASM59092v1_genomic.fna       |
| 1718 | <i>Peptoclostridium acidaminophilum</i> | GCA_000597865.1_ASM59786v1_genomic.fna       |
| 1719 | <i>Flammeovirgaceae bacterium</i>       | GCA_000597885.1_ASM59788v1_genomic.fna       |
| 1720 | <i>Gilliamella apicola</i>              | GCA_000599985.1_ASM59998v1_genomic.fna       |
| 1721 | <i>Pseudomonas protegens</i>            | GCA_000012265.1_ASM1226v1_genomic.fna        |
| 1722 | <i>Lysobacter capsici</i>               | GCA_001442785.1_ASM144278v1_genomic.fna      |
| 1723 | <i>Paenibacillus sabiniae</i>           | GCA_000612505.1_ASM61250v1_genomic.fna       |
| 1724 | <i>Lactobacillus gallinarum</i>         | GCA_001314245.2_ASM131424v2_genomic.fna      |
| 1725 | <i>Halotalea alkalilenta</i>            | GCA_001648175.1_ASM164817v1_genomic.fna      |
| 1726 | <i>Paracoccus yeei</i>                  | GCA_002073635.1_ASM207363v1_genomic.fna      |
| 1727 | <i>Castellaniella defragrans</i>        | GCA_000612685.1_scf7180000000004_genomic.fna |
| 1728 | <i>Prevotella enoeca</i>                | GCA_001444445.1_ASM144444v1_genomic.fna      |
| 1729 | <i>Prevotella fusca</i>                 | GCA_001262015.1_ASM126201v1_genomic.fna      |
| 1730 | <i>Geobacillus thermocatenulatus</i>    | GCA_002243665.1_ASM224366v1_genomic.fna      |
| 1731 | <i>Draconibacterium orientale</i>       | GCA_000626635.1_ASM62663v1_genomic.fna       |

|      |                                           |                                                              |
|------|-------------------------------------------|--------------------------------------------------------------|
| 1732 | <i>Corynebacterium glyciniphilum</i>      | GCA_000626675.1_ASM62667v1_genomic.fna                       |
| 1733 | <i>Novosphingobium resinovorum</i>        | GCA_001742225.1_ASM174222v1_genomic.fna                      |
| 1734 | <i>Chlamydia suis</i>                     | GCA_900169085.1_SWA-2_genomic.fna                            |
| 1735 | <i>Clostridium scatologenes</i>           | GCA_000968375.1_ASM96837v1_genomic.fna                       |
| 1736 | <i>Dyella jiangningensis</i>              | GCA_000632805.1_ASM63280v1_genomic.fna                       |
| 1737 | <i>Acetobacter persici</i>                | GCA_002006565.1_ASM200656v1_genomic.fna                      |
| 1738 | <i>Streptomyces pratensis</i>             | GCA_000176115.2_ASM17611v2_genomic.fna                       |
| 1739 | <i>Lactobacillus kunkeei</i>              | GCA_001314945.1_ASM131494v1_genomic.fna                      |
| 1740 | <i>Edwardsiella piscicida</i>             | GCA_000348565.1_ASM34856v1_genomic.fna                       |
| 1741 | <i>Mycoplasma californicum</i>            | GCA_000695835.1_ASM69583v1_genomic.fna                       |
| 1742 | <i>Halomonas campaniensis</i>             | GCA_000696485.1_ASM69648v1_genomic.fna                       |
| 1743 | <i>Kozakia baliensis</i>                  | GCA_001787335.1_ASM178733v1_genomic.fna                      |
| 1744 | <i>Rhodoluna laticola</i>                 | GCA_000699505.1_ASM69950v1_genomic.fna                       |
| 1745 | <i>Sinorhizobium americanum</i>           | GCA_000705595.2_ASM70559v2_genomic.fna                       |
| 1746 | <i>Bifidobacterium indicum</i>            | GCA_000706765.1_ASM70676v1_genomic.fna                       |
| 1747 | <i>Bacillus lehensis</i>                  | GCA_000706725.1_ASM70672v1_genomic.fna                       |
| 1748 | <i>Streptomyces alboflavus</i>            | GCA_002189675.1_ASM218967v1_genomic.fna                      |
| 1749 | <i>Kitasatospora aureofaciens</i>         | GCA_002082605.1_ASM208260v1_genomic.fna                      |
| 1750 | <i>Janthinobacterium agaricidamnosum</i>  | GCA_000723165.1_JAG1_genomic.fna                             |
| 1751 | <i>Mucivorans hirudinis</i>               | GCA_000723505.1_Mucivorans_M3_Nelson-Bomar-Fixed_genomic.fna |
| 1752 | <i>Terribacillus aidingensis</i>          | GCA_000725365.1_ASM72536v1_genomic.fna                       |
| 1753 | <i>Dermacoccus nishinomiyaensis</i>       | GCA_000725405.1_ASM72540v1_genomic.fna                       |
| 1754 | <i>Alteromonas australica</i>             | GCA_000730385.1_ASM73038v1_genomic.fna                       |
| 1755 | <i>Arenibacter algicola</i>               | GCA_002234495.1_ASM223449v1_genomic.fna                      |
| 1756 | <i>Amycolatopsis japonica</i>             | GCA_000732925.1_ASM73292v1_genomic.fna                       |
| 1757 | <i>Corynebacterium atypicum</i>           | GCA_000732945.1_ASM73294v1_genomic.fna                       |
| 1758 | <i>Sandaracinus amylolyticus</i>          | GCA_000737325.2_ASM73732v2_genomic.fna                       |
| 1759 | <i>Staphylococcus agnetis</i>             | GCA_001442815.1_ASM144281v1_genomic.fna                      |
| 1760 | <i>Bifidobacterium coryneforme</i>        | GCA_000737865.1_ASM73786v1_genomic.fna                       |
| 1761 | <i>Corynebacterium imitans</i>            | GCA_000739455.1_ASM73945v1_genomic.fna                       |
| 1762 | <i>Bifidobacterium actinocoloniiforme</i> | GCA_001263395.1_ASM126339v1_genomic.fna                      |
| 1763 | <i>Bifidobacterium scardovii</i>          | GCA_001042635.1_ASM104263v1_genomic.fna                      |
| 1764 | <i>Geobacillus subterraneus</i>           | GCA_001618685.1_ASM161868v1_genomic.fna                      |
| 1765 | <i>Pseudomonas alkylphenolica</i>         | GCA_000746525.1_ASM74652v1_genomic.fna                       |

|      |                                         |                                                     |
|------|-----------------------------------------|-----------------------------------------------------|
| 1766 | <i>Rickettsiales bacterium</i>          | GCA_000746585.2_ASM74658v2_genomic.fna              |
| 1767 | <i>Corynebacterium ureicelerivorans</i> | GCA_000747315.1_ASM74731v1_genomic.fna              |
| 1768 | <i>Carnobacterium inhibens</i>          | GCA_000493735.1_ASM49373v1_genomic.fna              |
| 1769 | <i>Ruminococcus bicirculans</i>         | GCA_000723465.1_Rb803_genomic.fna                   |
| 1770 | <i>Streptomyces leeuwenhoekii</i>       | GCA_001013905.1_sleC34_genomic.fna                  |
| 1771 | <i>Cobetia marina</i>                   | GCA_001720485.1_ASM172048v1_genomic.fna             |
| 1772 | <i>Klebsiella michiganensis</i>         | GCA_000240325.1_ASM24032v1_genomic.fna              |
| 1773 | <i>Treponema putidum</i>                | GCA_000755145.1_ASM75514v1_genomic.fna              |
| 1774 | <i>Nonlabens sediminis</i>              | GCA_002117085.1_ASM211708v1_genomic.fna             |
| 1775 | <i>Paenibacillus stellifer</i>          | GCA_000758685.1_ASM75868v1_genomic.fna              |
| 1776 | <i>Paenibacillus odorifer</i>           | GCA_000758725.1_ASM75872v1_genomic.fna              |
| 1777 | <i>Lactobacillus paraplantarum</i>      | GCA_001443645.1_ASM144364v1_genomic.fna             |
| 1778 | <i>Lysinibacillus varians</i>           | GCA_000600105.1_ASM60010v1_genomic.fna              |
| 1779 | <i>Paenibacillus borealis</i>           | GCA_000758665.1_ASM75866v1_genomic.fna              |
| 1780 | <i>Pseudomonas rhizosphaerae</i>        | GCA_000761155.1_ASM76115v1_genomic.fna              |
| 1781 | <i>Streptomyces glaucescens</i>         | GCA_000761215.1_ASM76121v1_genomic.fna              |
| 1782 | <i>Actinopolyspora erythraea</i>        | GCA_002263515.1_ASM226351v1_genomic.fna             |
| 1783 | <i>Thermoanaerobacter kivui</i>         | GCA_000763575.1_ASM76357v1_genomic.fna              |
| 1784 | <i>Sphingomonas taxi</i>                | GCA_000764535.1_ASM76453v1_genomic.fna              |
| 1785 | <i>Intestinimonas butyriciproducens</i> | GCA_001454945.1_ASM145494v1_genomic.fna             |
| 1786 | <i>Helicobacter typhlonius</i>          | GCA_001460635.1_hytyphlonius_mit97-6810_genomic.fna |
| 1787 | <i>Pantoea rwandensis</i>               | GCA_000759475.1_ASM75947v1_genomic.fna              |
| 1788 | <i>Corynebacterium camporealensis</i>   | GCA_000980815.1_ASM98081v1_genomic.fna              |
| 1789 | <i>Fervidobacterium islandicum</i>      | GCA_000767275.3_ASM76727v3_genomic.fna              |
| 1790 | <i>Anoxybacillus gonensis</i>           | GCA_001187595.1_ASM118759v1_genomic.fna             |
| 1791 | <i>Elizabethkingia miricola</i>         | GCA_000955665.1_ASM95566v1_genomic.fna              |
| 1792 | <i>Bacillus xiamenensis</i>             | GCA_001857925.1_ASM185792v1_genomic.fna             |
| 1793 | <i>Lactobacillus curieae</i>            | GCA_000785105.2_ASM78510v2_genomic.fna              |
| 1794 | <i>Pimelobacter simplex</i>             | GCA_000785495.1_ASM78549v1_genomic.fna              |
| 1795 | <i>Citrobacter braakii</i>              | GCA_002073755.1_ASM207375v1_genomic.fna             |
| 1796 | <i>Clostridium baratii</i>              | GCA_000789395.1_ASM78939v1_genomic.fna              |
| 1797 | <i>Collimonas arenae</i>                | GCA_000786695.1_ASM78669v1_genomic.fna              |
| 1798 | <i>Halomonas hydrothermalis</i>         | GCA_002442575.1_ASM244257v1_genomic.fna             |
| 1799 | <i>Deinococcus swuensis</i>             | GCA_000800395.1_ASM80039v1_genomic.fna              |

|      |                                       |                                         |
|------|---------------------------------------|-----------------------------------------|
| 1800 | <i>Fusobacterium hwasookii</i>        | GCA_001455085.1_ASM145508v1_genomic.fna |
| 1801 | <i>Actinobacillus equuli</i>          | GCA_000801145.1_ASM80114v1_genomic.fna  |
| 1802 | <i>Pseudomonas frederiksbergensis</i> | GCA_001874645.1_ASM187464v1_genomic.fna |
| 1803 | <i>Streptomyces pluripotens</i>       | GCA_000802245.2_ASM80224v2_genomic.fna  |
| 1804 | <i>Borrelia burgdorferi</i>           | GCA_000808095.1_ASM80809v1_genomic.fna  |
| 1805 | <i>Frischella perrara</i>             | GCA_000807275.1_ASM80727v1_genomic.fna  |
| 1806 | <i>Sulfurospirillum cavolei</i>       | GCA_001548055.1_ASM154805v1_genomic.fna |
| 1807 | <i>Coriobacteriaceae bacterium</i>    | GCA_000814825.1_ASM81482v1_genomic.fna  |
| 1808 | <i>Pandoraea sputorum</i>             | GCA_000814845.2_ASM81484v2_genomic.fna  |
| 1809 | <i>Coxiella endosymbiont</i>          | GCA_000815025.1_ASM81502v1_genomic.fna  |
| 1810 | <i>Pandoraea pulmonicola</i>          | GCA_000815105.2_ASM81510v2_genomic.fna  |
| 1811 | <i>Allofrancisella guangzhouensis</i> | GCA_000815225.1_ASM81522v1_genomic.fna  |
| 1812 | <i>Methylobacterium denitrificans</i> | GCA_000785705.2_ASM78570v2_genomic.fna  |
| 1813 | <i>Campylobacter peloridis</i>        | GCA_000816785.1_ASM81678v1_genomic.fna  |
| 1814 | <i>Geobacter pickeringii</i>          | GCA_000817955.1_ASM81795v1_genomic.fna  |
| 1815 | <i>Pseudomonas balearica</i>          | GCA_000818015.1_ASM81801v1_genomic.fna  |
| 1816 | <i>Clostridium argentinense</i>       | GCA_002074155.1_ASM207415v1_genomic.fna |
| 1817 | <i>Celeribacter indicus</i>           | GCA_000819565.1_ASM81956v1_genomic.fna  |
| 1818 | <i>Enterobacter ludwigii</i>          | GCA_001750725.1_ASM175072v1_genomic.fna |
| 1819 | <i>Aeromonas schubertii</i>           | GCA_001447335.1_ASM144733v1_genomic.fna |
| 1820 | <i>Pandoraea apista</i>               | GCA_000826965.3_ASM82696v3_genomic.fna  |
| 1821 | <i>Geoalkalibacter subterraneus</i>   | GCA_000827125.1_ASM82712v1_genomic.fna  |
| 1822 | <i>Methyloceanibacter caenitepidi</i> | GCA_000828475.1_ASM82847v1_genomic.fna  |
| 1823 | <i>Thiobacillus thioautotrophicus</i> | GCA_000828615.1_ASM82861v1_genomic.fna  |
| 1824 | <i>Sulfuritalea hydrogenivorans</i>   | GCA_000828635.1_ASM82863v1_genomic.fna  |
| 1825 | <i>Thermotoga caldiformis</i>         | GCA_000828655.1_ASM82865v1_genomic.fna  |
| 1826 | <i>Thermotoga profunda</i>            | GCA_000828675.1_ASM82867v1_genomic.fna  |
| 1827 | <i>Streptomyces vietnamensis</i>      | GCA_000830005.1_ASM83000v1_genomic.fna  |
| 1828 | <i>Bacillus bombysepticus</i>         | GCA_000831065.1_ASM83106v1_genomic.fna  |
| 1829 | <i>Marinobacter similis</i>           | GCA_000830985.1_ASM83098v1_genomic.fna  |
| 1830 | <i>Marinobacter salarius</i>          | GCA_000831005.1_ASM83100v1_genomic.fna  |
| 1831 | <i>Thioplaca ingrica</i>              | GCA_000828835.1_ASM82883v1_genomic.fna  |
| 1832 | <i>Mycoplasma canadense</i>           | GCA_000828855.1_ASM82885v1_genomic.fna  |
| 1833 | <i>Comamonadaceae bacterium</i>       | GCA_000828895.1_ASM82889v1_genomic.fna  |

|      |                                 |                                                           |
|------|---------------------------------|-----------------------------------------------------------|
| 1834 | Comamonadaceae bacterium        | GCA_000828915.1_ASM82891v1_genomic.fna                    |
| 1835 | Burkholderiales bacterium       | GCA_000828975.1_ASM82897v1_genomic.fna                    |
| 1836 | cyanobacterium endosymbiont     | GCA_000829235.1_ASM82923v1_genomic.fna                    |
| 1837 | Wolbachia endosymbiont          | GCA_000829315.1_ASM82931v1_genomic.fna                    |
| 1838 | Lactobacillus hokkaidonensis    | GCA_000829395.1_ASM82939v1_genomic.fna                    |
| 1839 | Lactobacillus heilongjiangensis | GCA_000831645.3_ASM83164v3_genomic.fna                    |
| 1840 | Corynebacterium singulare       | GCA_000833575.1_ASM83357v1_genomic.fna                    |
| 1841 | Salinispira pacifica            | GCA_000507245.1_ASM50724v1_genomic.fna                    |
| 1842 | Myroides profundus              | GCA_000833025.1_ASM83302v1_genomic.fna                    |
| 1843 | Mycobacterium immunogenum       | GCA_001605725.1_ASM160572v1_genomic.fna                   |
| 1844 | Campylobacter iguaniorum        | GCA_000736415.1_ASM73641v1_genomic.fna                    |
| 1845 | Streptomyces cyaneogriseus      | GCA_000931445.1_ASM93144v1_genomic.fna                    |
| 1846 | Rugosibacter aromaticivorans    | GCA_000934545.1_ASM93454v1_genomic.fna                    |
| 1847 | Pandoraella vermicularis        | GCA_000934605.2_ASM93460v2_genomic.fna                    |
| 1848 | Sulfitobacter pseudonitzschiae  | GCA_002222635.1_ASM222263v1_genomic.fna                   |
| 1849 | Siansivirga zeaxanthinifaciens  | GCA_000941055.1_ASM94105v1_genomic.fna                    |
| 1850 | Mycoplasma dispar               | GCA_000941075.1_ASM94107v1_genomic.fna                    |
| 1851 | Clostridium aceticum            | GCA_001042715.1_ASM104271v1_genomic.fna                   |
| 1852 | Gyneria sunshinyi               | GCA_000940805.1_ASM94080v1_genomic.fna                    |
| 1853 | Acholeplasma oculi              | GCA_000953195.1_Acholeplasma_oculi_strain_19L_genomic.fna |
| 1854 | Fermentimonas caenicola         | GCA_000953535.1_E5B_genomic.fna                           |
| 1855 | Tatlockia micdadei              | GCA_000953635.1_LMI_genomic.fna                           |
| 1856 | Aliivibrio wodanis              | GCA_000953695.1_AWOD1_genomic.fna                         |
| 1857 | Defluviitoga tunisiensis        | GCA_000953715.1_DTL3_genomic.fna                          |
| 1858 | Moritella viscosa               | GCA_000953735.1_MVIS1_genomic.fna                         |
| 1859 | Ralstonia mannitolilytica       | GCA_000954135.2_ASM95413v2_genomic.fna                    |
| 1860 | Azospirillum thiophilum         | GCA_001305595.1_ASM130559v1_genomic.fna                   |
| 1861 | Kosakonia oryzae                | GCA_001658025.1_ASM165802v1_genomic.fna                   |
| 1862 | Martella endophytica            | GCA_000960975.1_ASM96097v1_genomic.fna                    |
| 1863 | Paenibacillus beijingensis      | GCA_000961095.1_ASM96109v1_genomic.fna                    |
| 1864 | Muricauda lutea                 | GCA_000963865.1_ASM96386v1_genomic.fna                    |
| 1865 | Mageebacillus indolicus         | GCA_000025225.2_ASM2522v1_genomic.fna                     |
| 1866 | Oleispira antarctica            | GCA_000967895.1_ASM96789v1_genomic.fna                    |
| 1867 | Xenorhabdus poinarii            | GCA_000968175.1_ASM96817v1_genomic.fna                    |

|      |                                      |                                         |
|------|--------------------------------------|-----------------------------------------|
| 1868 | <i>Xenorhabdus doucetiae</i>         | GCA_000968195.1_ASM96819v1_genomic.fna  |
| 1869 | <i>Chania multitudinisentens</i>     | GCA_000520015.2_ASM52001v2_genomic.fna  |
| 1870 | <i>Chromobacterium vaccinii</i>      | GCA_001855275.1_ASM185527v1_genomic.fna |
| 1871 | <i>Verrucomicrobia bacterium</i>     | GCA_000972765.1_ASM97276v1_genomic.fna  |
| 1872 | <i>Pandoraea oxalativorans</i>       | GCA_000972785.3_ASM97278v3_genomic.fna  |
| 1873 | <i>Sodalis praecaptivus</i>          | GCA_000517425.1_ASM51742v1_genomic.fna  |
| 1874 | <i>Blochmannia endosymbiont</i>      | GCA_000973505.1_ASM97350v1_genomic.fna  |
| 1875 | <i>Blochmannia endosymbiont</i>      | GCA_000973545.1_ASM97354v1_genomic.fna  |
| 1876 | <i>Pontibacter korlensis</i>         | GCA_000973725.1_ASM97372v1_genomic.fna  |
| 1877 | <i>Spirosoma radiotolerans</i>       | GCA_000974425.1_ASM97442v1_genomic.fna  |
| 1878 | <i>Corynebacterium kutscheri</i>     | GCA_000980835.1_ASM98083v1_genomic.fna  |
| 1879 | <i>Salimicrobium jeotgali</i>        | GCA_001685435.3_ASM168543v3_genomic.fna |
| 1880 | <i>Kangiella geojedonensis</i>       | GCA_000981765.1_ASM98176v1_genomic.fna  |
| 1881 | <i>Sulfurovum lithotrophicum</i>     | GCA_000987835.1_ASM98783v1_genomic.fna  |
| 1882 | <i>Brevibacterium flavum</i>         | GCA_000987865.1_ASM98786v1_genomic.fna  |
| 1883 | <i>Halomonas huangheensis</i>        | GCA_001431725.1_ASM143172v1_genomic.fna |
| 1884 | <i>Clostridium bornimense</i>        | GCA_000577895.1_M2_40_genomic.fna       |
| 1885 | <i>Salinicoccus halodurans</i>       | GCA_001005905.1_ASM100590v1_genomic.fna |
| 1886 | <i>Staphylococcus argenteus</i>      | GCA_000236925.1_ASM23692v1_genomic.fna  |
| 1887 | <i>Nitrosospira lacus</i>            | GCA_000355765.4_ASM35576v4_genomic.fna  |
| 1888 | <i>Gemmatimonas phototrophica</i>    | GCA_000695095.2_ASM69509v2_genomic.fna  |
| 1889 | <i>Nitrosomonas communis</i>         | GCA_001007935.1_ASM100793v1_genomic.fna |
| 1890 | <i>Deinococcus soli</i>              | GCA_001007995.1_ASM100799v1_genomic.fna |
| 1891 | <i>Altererythrobacter atlanticus</i> | GCA_001008165.2_ASM100816v2_genomic.fna |
| 1892 | <i>Staphylococcus succinus</i>       | GCA_001902315.1_ASM190231v1_genomic.fna |
| 1893 | <i>Erythrobacter gangjinensis</i>    | GCA_001886695.1_ASM188669v1_genomic.fna |
| 1894 | <i>Vibrio antiquarius</i>            | GCA_000024825.1_ASM2482v1_genomic.fna   |
| 1895 | <i>Brevibacillus formosus</i>        | GCA_002215075.1_ASM221507v1_genomic.fna |
| 1896 | <i>Mycoplasma gallinaceum</i>        | GCA_000965765.1_ASM96576v1_genomic.fna  |
| 1897 | <i>Polyangium brachysporum</i>       | GCA_001017435.1_ASM101743v1_genomic.fna |
| 1898 | <i>Staphylococcus condimenti</i>     | GCA_001618885.1_ASM161888v1_genomic.fna |
| 1899 | <i>Pandoraea thiooxydans</i>         | GCA_001931675.1_ASM193167v1_genomic.fna |
| 1900 | <i>Klebsiella quasipneumoniae</i>    | GCA_001596075.2_ASM159607v2_genomic.fna |
| 1901 | <i>Aeromonas aquatica</i>            | GCA_001895965.1_ASM189596v1_genomic.fna |



|      |                                        |                                         |
|------|----------------------------------------|-----------------------------------------|
| 1902 | <i>Sphingopyxis fribergensis</i>       | GCA_000803645.1_ASM80364v1_genomic.fna  |
| 1903 | <i>Corynebacterium mustelae</i>        | GCA_001020985.1_ASM102098v1_genomic.fna |
| 1904 | <i>Corynebacterium epidermidicanis</i> | GCA_001021025.1_ASM102102v1_genomic.fna |
| 1905 | <i>Corynebacterium testudinatoris</i>  | GCA_001021045.1_ASM102104v1_genomic.fna |
| 1906 | <i>Corynebacterium uterequi</i>        | GCA_001021065.1_ASM102106v1_genomic.fna |
| 1907 | <i>Chryseobacterium gallinarum</i>     | GCA_001021975.1_ASM102197v1_genomic.fna |
| 1908 | <i>Actinobacteria bacterium</i>        | GCA_001023575.1_ASM102357v1_genomic.fna |
| 1909 | <i>Kosmotoga pacifica</i>              | GCA_001027025.1_ASM102702v1_genomic.fna |
| 1910 | <i>Archangium gephyra</i>              | GCA_001027285.1_ASM102728v1_genomic.fna |
| 1911 | <i>Endomicrobium proavitum</i>         | GCA_001027545.1_ASM102754v1_genomic.fna |
| 1912 | <i>Croceicoccus naphthovorans</i>      | GCA_001028705.1_ASM102870v1_genomic.fna |
| 1913 | <i>Pandoraea faecigallinarum</i>       | GCA_001029105.3_ASM102910v3_genomic.fna |
| 1914 | <i>Spiroplasma atrichopogonis</i>      | GCA_001029245.1_ASM102924v1_genomic.fna |
| 1915 | <i>Berkelbacteria bacterium</i>        | GCA_001029735.1_ASM102973v1_genomic.fna |
| 1916 | <i>Altererythrobacter marensis</i>     | GCA_001028625.1_ASM102862v1_genomic.fna |
| 1917 | <i>Mycobacterium sinense</i>           | GCA_000214155.1_ASM21415v1_genomic.fna  |
| 1918 | <i>Lactobacillus acetotolerans</i>     | GCA_001042405.1_ASM104240v1_genomic.fna |
| 1919 | <i>Marinobacter psychrophilus</i>      | GCA_001043175.1_ASM104317v1_genomic.fna |
| 1920 | <i>Methylobacterium aquaticum</i>      | GCA_001548015.1_ASM154801v1_genomic.fna |
| 1921 | <i>Yersinia aleksiciae</i>             | GCA_001047675.1_ASM104767v1_genomic.fna |
| 1922 | <i>Cyclobacterium amurskyense</i>      | GCA_001050135.1_ASM105013v1_genomic.fna |
| 1923 | <i>Lactobacillus koreensis</i>         | GCA_001050435.1_ASM105043v1_genomic.fna |
| 1924 | <i>Lactobacillus ginsenosidimutans</i> | GCA_001050475.1_ASM105047v1_genomic.fna |
| 1925 | <i>Thauera humireducens</i>            | GCA_001051995.2_ASM105199v2_genomic.fna |
| 1926 | <i>Coxiella-like endosymbiont</i>      | GCA_001077715.1_ASM107771v1_genomic.fna |
| 1927 | <i>Pseudomonas trivialis</i>           | GCA_001186335.1_ASM118633v1_genomic.fna |
| 1928 | <i>Mycobacterium goodii</i>            | GCA_001187505.1_ASM118750v1_genomic.fna |
| 1929 | <i>Wenzhouxiangella marina</i>         | GCA_001187785.1_ASM118778v1_genomic.fna |
| 1930 | <i>Octadecabacter temperatus</i>       | GCA_001187845.1_ASM118784v1_genomic.fna |
| 1931 | <i>Staphylococcus schleiferi</i>       | GCA_001188855.1_ASM118885v1_genomic.fna |
| 1932 | <i>Chondromyces crocatus</i>           | GCA_001189295.1_ASM118929v1_genomic.fna |
| 1933 | <i>Luteipulveratus mongoliensis</i>    | GCA_001190945.1_ASM119094v1_genomic.fna |
| 1934 | <i>Jeotgalibaca dankookensis</i>       | GCA_002005405.1_ASM200540v1_genomic.fna |
| 1935 | <i>Lactobacillus agilis</i>            | GCA_002240375.1_ASM224037v1_genomic.fna |

|      |                                         |                                         |
|------|-----------------------------------------|-----------------------------------------|
| 1936 | <i>Spiroplasma tauronicum</i>           | GCA_001262715.1_ASM126271v1_genomic.fna |
| 1937 | <i>Vulgatibacter incomptus</i>          | GCA_001263175.1_ASM126317v1_genomic.fna |
| 1938 | <i>Labilithrix luteola</i>              | GCA_001263205.1_ASM126320v1_genomic.fna |
| 1939 | <i>Microcystis panniformis</i>          | GCA_001264245.1_ASM126424v1_genomic.fna |
| 1940 | <i>Actinomyces meyeri</i>               | GCA_001262055.1_ASM126205v1_genomic.fna |
| 1941 | <i>Spiroplasma litorale</i>             | GCA_001267155.1_ASM126715v1_genomic.fna |
| 1942 | <i>Oblitimonas alkaliphila</i>          | GCA_001267175.1_ASM126717v1_genomic.fna |
| 1943 | <i>Nitrospira moscoviensis</i>          | GCA_001273775.1_ASM127377v1_genomic.fna |
| 1944 | <i>Corynebacterium lactis</i>           | GCA_001274895.1_ASM127489v1_genomic.fna |
| 1945 | <i>Corynebacterium deserti</i>          | GCA_001277995.1_ASM127799v1_genomic.fna |
| 1946 | <i>Microbacterium chocolatum</i>        | GCA_001652465.1_ASM165246v1_genomic.fna |
| 1947 | <i>Bartonella ancashensis</i>           | GCA_001281405.1_ASM128140v1_genomic.fna |
| 1948 | <i>Altererythrobacter epoxidivorans</i> | GCA_001281485.1_ASM128148v1_genomic.fna |
| 1949 | <i>Spiroplasma cantharicola</i>         | GCA_001281045.1_ASM128104v1_genomic.fna |
| 1950 | <i>Lawsonella clevelandensis</i>        | GCA_001293125.1_ASM129312v1_genomic.fna |
| 1951 | <i>Comamonas kerstersii</i>             | GCA_002056725.1_ASM205672v1_genomic.fna |
| 1952 | <i>Arthrobacter alpinus</i>             | GCA_001294625.1_ASM129462v1_genomic.fna |
| 1953 | <i>Pseudoalteromonas tetraodonis</i>    | GCA_002310835.1_ASM231083v1_genomic.fna |
| 1954 | <i>Psychrobacter urativorans</i>        | GCA_001298525.1_ASM129852v1_genomic.fna |
| 1955 | <i>Kibdelosporangium phytohabitans</i>  | GCA_001302585.1_ASM130258v1_genomic.fna |
| 1956 | <i>Beggiatoa leptomitiformis</i>        | GCA_001305575.2_ASM130557v2_genomic.fna |
| 1957 | <i>Sphingomonas hengshuiensis</i>       | GCA_000935025.1_ASM93502v1_genomic.fna  |
| 1958 | <i>Rufibacter tibetensis</i>            | GCA_001310085.1_ASM131008v1_genomic.fna |
| 1959 | <i>Mycobacterium chimaera</i>           | GCA_001750065.2_ASM175006v2_genomic.fna |
| 1960 | <i>Celeribacter marinus</i>             | GCA_001308265.1_ASM130826v1_genomic.fna |
| 1961 | <i>Lactobacillus lindneri</i>           | GCA_001702135.1_ASM170213v1_genomic.fna |
| 1962 | <i>Lactobacillus paracollinoides</i>    | GCA_001702175.1_ASM170217v1_genomic.fna |
| 1963 | <i>Lactobacillus amylophilus</i>        | GCA_001936335.1_ASM193633v1_genomic.fna |
| 1964 | <i>Methylobacterium phyllosphaerae</i>  | GCA_001936175.1_ASM193617v1_genomic.fna |
| 1965 | <i>Kosakonia cowanii</i>                | GCA_001975225.1_ASM197522v1_genomic.fna |
| 1966 | <i>Stenotrophomonas acidaminiphila</i>  | GCA_001314305.1_ASM131430v1_genomic.fna |
| 1967 | <i>Mycobacterium pallens</i>            | GCA_002335685.1_ASM233568v1_genomic.fna |
| 1968 | <i>Blastochloris viridis</i>            | GCA_001402875.1_ASM140287v1_genomic.fna |
| 1969 | <i>Streptomyces pactum</i>              | GCA_001767375.1_ASM176737v1_genomic.fna |

|      |                                         |                                             |
|------|-----------------------------------------|---------------------------------------------|
| 1970 | <i>Streptomyces puniscabiei</i>         | GCA_001735805.1_ASM173580v1_genomic.fna     |
| 1971 | <i>Streptomyces silaceus</i>            | GCA_001975025.1_ASM197502v1_genomic.fna     |
| 1972 | <i>Agarivorans gilvus</i>               | GCA_001420915.1_ASM142091v1_genomic.fna     |
| 1973 | <i>Bordetella pseudohinzii</i>          | GCA_001698185.1_ASM169818v1_genomic.fna     |
| 1974 | <i>Stenotrophomonas nitritireducens</i> | GCA_001700965.1_ASM170096v1_genomic.fna     |
| 1975 | <i>Lactobacillus parabuchneri</i>       | GCA_001922025.1_ASM192202v1_genomic.fna     |
| 1976 | <i>Lactobacillus zymae</i>              | GCA_900183405.1_ASM90018340v1_genomic.fna   |
| 1977 | <i>Bacillus paralicheniformis</i>       | GCA_000408885.1_ASM40888v1_genomic.fna      |
| 1978 | <i>Bacillus muralis</i>                 | GCA_001645685.2_ASM164568v2_genomic.fna     |
| 1979 | <i>Sneathia amnii</i>                   | GCA_000973085.1_ASM97308v1_genomic.fna      |
| 1980 | <i>Lentibacillus amyloliquefaciens</i>  | GCA_001307805.2_ASM130780v2_genomic.fna     |
| 1981 | <i>Bacillus glycinifermentans</i>       | GCA_900093775.1_EVONIK_BGLY_genomic.fna     |
| 1982 | <i>Lysobacter gummosus</i>              | GCA_001442805.1_ASM144280v1_genomic.fna     |
| 1983 | <i>Salinivirga cyanobacteriivorans</i>  | GCA_001443605.1_ASM144360v1_genomic.fna     |
| 1984 | <i>Pseudoalteromonas phenolica</i>      | GCA_001444405.1_ASM144440v1_genomic.fna     |
| 1985 | <i>Pseudohongiella spirulinae</i>       | GCA_001444425.1_ASM144442v1_genomic.fna     |
| 1986 | <i>Halocynthiibacter arcticus</i>       | GCA_000812665.2_ASM81266v2_genomic.fna      |
| 1987 | <i>Acinetobacter equi</i>               | GCA_001307195.1_ASM130719v1_genomic.fna     |
| 1988 | <i>Nitrosomonas ureae</i>               | GCA_001455205.1_ASM145520v1_genomic.fna     |
| 1989 | <i>Pseudoalteromonas issachenkonii</i>  | GCA_001455325.1_ASM145532v1_genomic.fna     |
| 1990 | <i>Mycobacterium saopaulense</i>        | GCA_001456355.1_ASM145635v1_genomic.fna     |
| 1991 | <i>Devriesea agamarum</i>               | GCA_900070355.1_S2_rcS3_S1_rcS3_genomic.fna |
| 1992 | <i>Pseudoalteromonas translucida</i>    | GCA_001465295.1_ASM146529v1_genomic.fna     |
| 1993 | <i>Pandoraea norimbergensis</i>         | GCA_001465545.3_ASM146554v3_genomic.fna     |
| 1994 | <i>Planococcus rifietoensis</i>         | GCA_001465795.2_ASM146579v2_genomic.fna     |
| 1995 | <i>Planococcus kocurii</i>              | GCA_001465835.2_ASM146583v2_genomic.fna     |
| 1996 | <i>Lacimicrobium alkaliphilum</i>       | GCA_001466725.1_ASM146672v1_genomic.fna     |
| 1997 | <i>Paenibacillus naphthalenovorans</i>  | GCA_001465255.1_ASM146525v1_genomic.fna     |
| 1998 | <i>Alteromonas mediterranea</i>         | GCA_000020585.3_ASM2058v3_genomic.fna       |
| 1999 | <i>Enterobacter xiangfangensis</i>      | GCA_001729785.1_ASM172978v1_genomic.fna     |
| 2000 | <i>Kocuria flava</i>                    | GCA_001482365.1_ASM148236v1_genomic.fna     |
| 2001 | <i>Roseateles depolymerans</i>          | GCA_001483865.1_ASM148386v1_genomic.fna     |
| 2002 | <i>Pseudarthrobacter sulfonivorans</i>  | GCA_001484605.1_ASM148460v1_genomic.fna     |
| 2003 | <i>Tenacibaculum dicentrarchi</i>       | GCA_001483385.1_ASM148338v1_genomic.fna     |

|      |                                       |                                                           |
|------|---------------------------------------|-----------------------------------------------------------|
| 2004 | <i>Acetobacter senegalensis</i>       | GCA_001499615.1_Acetobacter_senegalensis_108B_genomic.fna |
| 2005 | <i>Thermus parvatiensis</i>           | GCA_001535545.1_ASM153554v1_genomic.fna                   |
| 2006 | <i>Deinococcus actinosclerus</i>      | GCA_001507665.1_ASM150766v1_genomic.fna                   |
| 2007 | <i>Aeromicrobium erythreum</i>        | GCA_001509405.1_ASM150940v1_genomic.fna                   |
| 2008 | <i>Streptomyces reticuli</i>          | GCA_001511815.1_TUE45_genomic.fna                         |
| 2009 | <i>Paenibacillus bovis</i>            | GCA_001421015.2_ASM142101v2_genomic.fna                   |
| 2010 | <i>Rhodothermaceae bacterium</i>      | GCA_001518995.2_ASM151899v2_genomic.fna                   |
| 2011 | <i>Burkholderia pseudomultivorans</i> | GCA_001718415.1_ASM171841v1_genomic.fna                   |
| 2012 | <i>Erwinia gerundensis</i>            | GCA_001517405.1_EM595_genomic.fna                         |
| 2013 | <i>Burkholderia territorii</i>        | GCA_001718335.1_ASM171833v1_genomic.fna                   |
| 2014 | <i>Burkholderia diffusa</i>           | GCA_001718315.1_ASM171831v1_genomic.fna                   |
| 2015 | <i>Burkholderia stagnalis</i>         | GCA_001718955.1_ASM171895v1_genomic.fna                   |
| 2016 | <i>Burkholderia latens</i>            | GCA_001718795.1_ASM171879v1_genomic.fna                   |
| 2017 | <i>Arsenophonus symbiont</i>          | GCA_001534665.1_ASM153466v1_genomic.fna                   |
| 2018 | <i>Streptomyces griseochromogenes</i> | GCA_001542625.2_ASM154262v2_genomic.fna                   |
| 2019 | <i>Microterricola viridarii</i>       | GCA_001542775.1_ASM154277v1_genomic.fna                   |
| 2020 | <i>Aerococcus sanguinicola</i>        | GCA_001543145.1_ASM154314v1_genomic.fna                   |
| 2021 | <i>Aerococcus urinaehominis</i>       | GCA_001543245.1_ASM154324v1_genomic.fna                   |
| 2022 | <i>Caldimicrobium thiodismutans</i>   | GCA_001548275.1_ASM154827v1_genomic.fna                   |
| 2023 | <i>Actinomyces radidentis</i>         | GCA_001553565.1_ASM155356v1_genomic.fna                   |
| 2024 | <i>Desulfovibrio fairfieldensis</i>   | GCA_001553605.1_ASM155360v1_genomic.fna                   |
| 2025 | <i>Limnochorda pilosa</i>             | GCA_001544015.1_ASM154401v1_genomic.fna                   |
| 2026 | <i>Halomonas chromatireducens</i>     | GCA_001545155.1_ASM154515v1_genomic.fna                   |
| 2027 | <i>Thermosulfidibacter takaii</i>     | GCA_001547735.1_ASM154773v1_genomic.fna                   |
| 2028 | <i>Vibrio tritonius</i>               | GCA_001547935.1_ASM154793v1_genomic.fna                   |
| 2029 | <i>Asaia bogorensis</i>               | GCA_001547995.1_ASM154799v1_genomic.fna                   |
| 2030 | <i>Faecalibaculum rodentium</i>       | GCA_001564455.1_ASM156445v1_genomic.fna                   |
| 2031 | <i>Myxococcus hansupus</i>            | GCA_000280925.3_ASM28092v3_genomic.fna                    |
| 2032 | <i>Alteromonas addita</i>             | GCA_001562195.1_ASM156219v1_genomic.fna                   |
| 2033 | <i>Sinomonas atrocyanea</i>           | GCA_001577305.1_ASM157730v1_genomic.fna                   |
| 2034 | <i>Steroidobacter denitrificans</i>   | GCA_001579945.1_ASM157994v1_genomic.fna                   |
| 2035 | <i>Corynebacterium simulans</i>       | GCA_001586215.1_ASM158621v1_genomic.fna                   |
| 2036 | <i>Brucella vulpis</i>                | GCA_900000005.1_BVF60_genomic.fna                         |
| 2037 | <i>Enterobacter cloacae</i>           | GCA_001729805.1_ASM172980v1_genomic.fna                   |

|      |                                      |                                         |
|------|--------------------------------------|-----------------------------------------|
| 2038 | <i>Enterobacter cloacae</i>          | GCA_000750225.1_ASM75022v1_genomic.fna  |
| 2039 | <i>Gluconobacter albidus</i>         | GCA_002005485.1_ASM200548v1_genomic.fna |
| 2040 | <i>Collimonas pratensis</i>          | GCA_001584185.1_ASM158418v1_genomic.fna |
| 2041 | <i>Obesumbacterium proteus</i>       | GCA_001586165.1_ASM158616v1_genomic.fna |
| 2042 | <i>Zhongshania aliphaticivorans</i>  | GCA_001586255.1_ASM158625v1_genomic.fna |
| 2043 | <i>Pedobacter cryoconitis</i>        | GCA_001590605.1_ASM159060v1_genomic.fna |
| 2044 | <i>Sporosarcina psychrophila</i>     | GCA_001590685.1_ASM159068v1_genomic.fna |
| 2045 | <i>Serratia ficaria</i>              | GCA_900187015.1_50465_F01_genomic.fna   |
| 2046 | <i>Brevundimonas vesicularis</i>     | GCA_002208825.1_ASM220882v1_genomic.fna |
| 2047 | <i>Planococcus maritimus</i>         | GCA_001999905.1_ASM199990v1_genomic.fna |
| 2048 | <i>Edwardsiella anguillarum</i>      | GCA_000264765.2_ASM26476v2_genomic.fna  |
| 2049 | <i>Aminobacter aminovorans</i>       | GCA_001605015.1_ASM160501v1_genomic.fna |
| 2050 | <i>Helicobacter himalayensis</i>     | GCA_001602095.1_ASM160209v1_genomic.fna |
| 2051 | <i>Pseudomonas koreensis</i>         | GCA_001605965.1_ASM160596v1_genomic.fna |
| 2052 | <i>Psychrobacter alimentarius</i>    | GCA_001606025.1_ASM160602v1_genomic.fna |
| 2053 | <i>Bacteroidetes bacterium</i>       | GCA_001602415.1_ASM160241v1_genomic.fna |
| 2054 | <i>Hyphomonadaceae bacterium</i>     | GCA_001602435.1_ASM160243v1_genomic.fna |
| 2055 | <i>Betaproteobacteria bacterium</i>  | GCA_001602455.1_ASM160245v1_genomic.fna |
| 2056 | <i>Pontibacter akesuensis</i>        | GCA_001611675.1_ASM161167v1_genomic.fna |
| 2057 | <i>Haematospirillum jordaniae</i>    | GCA_001611975.1_ASM161197v1_genomic.fna |
| 2058 | <i>Jeotgalibacillus malaysiensis</i> | GCA_000818095.1_ASM81809v1_genomic.fna  |
| 2059 | <i>Rummeliibacillus stabekisii</i>   | GCA_001617605.1_ASM161760v1_genomic.fna |
| 2060 | <i>Sedimenticola thiotaurini</i>     | GCA_001007875.1_ASM100787v1_genomic.fna |
| 2061 | <i>Microbulbifer thermotolerans</i>  | GCA_001617625.1_ASM161762v1_genomic.fna |
| 2062 | <i>Fictibacillus phosphorivorans</i> | GCA_001629705.2_ASM162970v2_genomic.fna |
| 2063 | <i>Polynucleobacter duraquae</i>     | GCA_000973625.1_ASM97362v1_genomic.fna  |
| 2064 | <i>Defluviimonas alba</i>            | GCA_001620265.1_ASM162026v1_genomic.fna |
| 2065 | <i>Chelatococcus daeguensis</i>      | GCA_001887265.1_ASM188726v1_genomic.fna |
| 2066 | <i>Geobacter anodireducens</i>       | GCA_001628815.1_ASM162881v1_genomic.fna |
| 2067 | <i>Anoxybacillus amylolyticus</i>    | GCA_001634285.1_ASM163428v1_genomic.fna |
| 2068 | <i>Erythrobacter atlanticus</i>      | GCA_001077815.2_ASM107781v2_genomic.fna |
| 2069 | <i>Algibacter alginicilyticus</i>    | GCA_001310225.1_ASM131022v1_genomic.fna |
| 2070 | <i>Moraxella ovis</i>                | GCA_001636015.1_ASM163601v1_genomic.fna |
| 2071 | <i>Azospirillum humicireducens</i>   | GCA_001639105.1_ASM163910v1_genomic.fna |

|      |                                         |                                         |
|------|-----------------------------------------|-----------------------------------------|
| 2072 | <i>Fictibacillus arsenicus</i>          | GCA_001642935.2_ASM164293v2_genomic.fna |
| 2073 | <i>Deinococcus puniceus</i>             | GCA_001644565.1_ASM164456v1_genomic.fna |
| 2074 | <i>Paenibacillus swuensis</i>           | GCA_001644605.1_ASM164460v1_genomic.fna |
| 2075 | <i>Dyella thiooxydans</i>               | GCA_001641285.1_ASM164128v1_genomic.fna |
| 2076 | <i>Pseudomonas antarctica</i>           | GCA_001647715.1_ASM164771v1_genomic.fna |
| 2077 | <i>Denitrobacterium detoxificans</i>    | GCA_001643775.1_ASM164377v1_genomic.fna |
| 2078 | <i>Polynucleobacter asymbioticus</i>    | GCA_000016345.1_ASM1634v1_genomic.fna   |
| 2079 | <i>Dietzia timorensis</i>               | GCA_001659785.1_ASM165978v1_genomic.fna |
| 2080 | <i>Ochrobactrum pseudogrignonense</i>   | GCA_001652485.1_ASM165248v1_genomic.fna |
| 2081 | <i>Streptococcus pantholopis</i>        | GCA_001642085.1_ASM164208v1_genomic.fna |
| 2082 | <i>Ralstonia insidiosa</i>              | GCA_001653935.1_ASM165393v1_genomic.fna |
| 2083 | <i>Streptomyces parvulus</i>            | GCA_001660045.1_ASM166004v1_genomic.fna |
| 2084 | <i>Croceicoccus marinus</i>             | GCA_001661675.2_ASM166167v2_genomic.fna |
| 2085 | <i>Altererythrobacter ishigakiensis</i> | GCA_001663155.1_ASM166315v1_genomic.fna |
| 2086 | <i>Porphyrobacter neustonensis</i>      | GCA_001663175.1_ASM166317v1_genomic.fna |
| 2087 | <i>Lactobacillus backii</i>             | GCA_001663675.1_ASM166367v1_genomic.fna |
| 2088 | <i>Rhizobiales bacterium</i>            | GCA_001664005.1_ASM166400v1_genomic.fna |
| 2089 | <i>Acinetobacter lactucae</i>           | GCA_002076935.1_ASM207693v1_genomic.fna |
| 2090 | <i>Bordetella flabilis</i>              | GCA_001676725.1_ASM167672v1_genomic.fna |
| 2091 | <i>Woeseia oceani</i>                   | GCA_001677435.1_ASM167743v1_genomic.fna |
| 2092 | <i>Dermabacter vaginalis</i>            | GCA_001678905.1_ASM167890v1_genomic.fna |
| 2093 | <i>Pseudomonas cerasi</i>               | GCA_900074915.1_PCPL58T_genomic.fna     |
| 2094 | <i>Alteromonas naphthalenivorans</i>    | GCA_000213655.1_ASM21365v1_genomic.fna  |
| 2095 | <i>Bordetella bronchialis</i>           | GCA_001676705.1_ASM167670v1_genomic.fna |
| 2096 | <i>Caulobacteraceae bacterium</i>       | GCA_001679665.1_ASM167966v1_genomic.fna |
| 2097 | <i>Cryobacterium arcticum</i>           | GCA_001679725.1_ASM167972v1_genomic.fna |
| 2098 | <i>Polaribacter reichenbachii</i>       | GCA_001975665.1_ASM197566v1_genomic.fna |
| 2099 | <i>Azoarcus olearius</i>                | GCA_001682385.1_ASM168238v1_genomic.fna |
| 2100 | <i>Streptomyces lincolnensis</i>        | GCA_001685355.1_ASM168535v1_genomic.fna |
| 2101 | <i>Burkholderia stabilis</i>            | GCA_001742165.1_ASM174216v1_genomic.fna |
| 2102 | <i>Altererythrobacter namhicola</i>     | GCA_001687545.1_ASM168754v1_genomic.fna |
| 2103 | <i>Planococcus plakortidis</i>          | GCA_001687605.2_ASM168760v2_genomic.fna |
| 2104 | <i>Burkholderiales bacterium</i>        | GCA_001688905.2_ASM168890v2_genomic.fna |
| 2105 | <i>Erysipelotrichaceae bacterium</i>    | GCA_001688965.2_ASM168896v2_genomic.fna |

|      |                                         |                                         |
|------|-----------------------------------------|-----------------------------------------|
| 2106 | <i>Bradyrhizobium icense</i>            | GCA_001693385.1_ASM169338v1_genomic.fna |
| 2107 | <i>Desulfuromonas soudanensis</i>       | GCA_001278055.1_ASM127805v1_genomic.fna |
| 2108 | <i>Streptococcus halotolerans</i>       | GCA_001598035.1_ASM159803v1_genomic.fna |
| 2109 | <i>Streptococcus marmotae</i>           | GCA_001623565.1_ASM162356v1_genomic.fna |
| 2110 | <i>Wenyingzhuangia fucanilytica</i>     | GCA_001697185.1_ASM169718v1_genomic.fna |
| 2111 | <i>Immundisolibacter cernigliae</i>     | GCA_001697225.1_ASM169722v1_genomic.fna |
| 2112 | <i>Altererythrobacter dongtanensis</i>  | GCA_001698205.1_ASM169820v1_genomic.fna |
| 2113 | <i>Akkermansia glycaniphila</i>         | GCA_900097105.1_WK001_genomic.fna       |
| 2114 | <i>Cloacibacillus porcorum</i>          | GCA_001701045.1_ASM170104v1_genomic.fna |
| 2115 | <i>Streptomyces sampsonii</i>           | GCA_001704195.1_ASM170419v1_genomic.fna |
| 2116 | <i>Streptomyces noursei</i>             | GCA_001704275.1_ASM170427v1_genomic.fna |
| 2117 | <i>Paenibacillus kribbensis</i>         | GCA_002240415.1_ASM224041v1_genomic.fna |
| 2118 | <i>Paenibacillus yonginensis</i>        | GCA_001685395.1_ASM168539v1_genomic.fna |
| 2119 | <i>Kangiella sediminilitoris</i>        | GCA_001708405.1_ASM170840v1_genomic.fna |
| 2120 | <i>Spiroplasma helicoides</i>           | GCA_001715535.1_ASM171553v1_genomic.fna |
| 2121 | <i>Dialister pneumosintes</i>           | GCA_001717505.1_ASM171750v1_genomic.fna |
| 2122 | <i>Anaerolineaceae bacterium</i>        | GCA_001717545.1_ASM171754v1_genomic.fna |
| 2123 | <i>Sphingomonas panacis</i>             | GCA_001717955.1_ASM171795v1_genomic.fna |
| 2124 | <i>Burkholderia metallica</i>           | GCA_001718555.1_ASM171855v1_genomic.fna |
| 2125 | <i>Bacillus gibsonii</i>                | GCA_001719185.1_ASM171918v1_genomic.fna |
| 2126 | <i>Xenorhabdus hominickii</i>           | GCA_001721185.1_ASM172118v1_genomic.fna |
| 2127 | <i>Pedobacter steynii</i>               | GCA_001721645.1_ASM172164v1_genomic.fna |
| 2128 | <i>Bacillus beveridgei</i>              | GCA_001721685.1_ASM172168v1_genomic.fna |
| 2129 | <i>Frankia casuarinae</i>               | GCA_000013345.1_ASM1334v1_genomic.fna   |
| 2130 | <i>Clostridium taeniosporum</i>         | GCA_001735765.1_ASM173576v1_genomic.fna |
| 2131 | <i>bacterium AB1</i>                    | GCA_001729625.1_ASM172962v1_genomic.fna |
| 2132 | <i>Lacunisphaera limnophila</i>         | GCA_001746835.1_ASM174683v1_genomic.fna |
| 2133 | <i>Chlorobaculum limnaeum</i>           | GCA_001747405.1_ASM174740v1_genomic.fna |
| 2134 | <i>Actinoalloteichus hymeniacidonis</i> | GCA_001747425.1_ASM174742v1_genomic.fna |
| 2135 | <i>Pectobacterium parmentieri</i>       | GCA_000024645.1_ASM2464v1_genomic.fna   |
| 2136 | <i>Geosporobacter ferrireducens</i>     | GCA_001750685.1_ASM175068v1_genomic.fna |
| 2137 | <i>Streptomyces rubrolavendulae</i>     | GCA_001750785.1_ASM175078v1_genomic.fna |
| 2138 | <i>Flavobacterium gilvum</i>            | GCA_001761465.1_ASM176146v1_genomic.fna |
| 2139 | <i>Streptococcus himalayensis</i>       | GCA_001708305.1_ASM170830v1_genomic.fna |

|      |                                         |                                         |
|------|-----------------------------------------|-----------------------------------------|
| 2140 | <i>Clostridium formicaceticum</i>       | GCA_001854185.1_ASM185418v1_genomic.fna |
| 2141 | <i>Prauserella marina</i>               | GCA_002240355.1_ASM224035v1_genomic.fna |
| 2142 | <i>Tessaracoccus flavus</i>             | GCA_001997295.1_ASM199729v1_genomic.fna |
| 2143 | <i>Petrimonas mucosa</i>                | GCA_900095795.1_E5A_genomic.fna         |
| 2144 | <i>Niabella ginsenosidivorans</i>       | GCA_001654455.1_ASM165445v1_genomic.fna |
| 2145 | <i>Frankia inefficax</i>                | GCA_000166135.1_ASM16613v1_genomic.fna  |
| 2146 | <i>Planococcus faecalis</i>             | GCA_002009235.1_ASM200923v1_genomic.fna |
| 2147 | <i>Polaribacter vadi</i>                | GCA_001761365.1_ASM176136v1_genomic.fna |
| 2148 | <i>Vagococcus teuberi</i>               | GCA_001870205.1_ASM187020v1_genomic.fna |
| 2149 | <i>Lentzea guizhouensis</i>             | GCA_001701025.1_ASM170102v1_genomic.fna |
| 2150 | <i>Clostridium estertheticum</i>        | GCA_001877035.1_ASM187703v1_genomic.fna |
| 2151 | <i>Flavobacteriaceae bacterium</i>      | GCA_001880285.1_ASM188028v1_genomic.fna |
| 2152 | <i>Thermus brockianus</i>               | GCA_001880325.1_ASM188032v1_genomic.fna |
| 2153 | <i>Corynebacterium crudilactis</i>      | GCA_001643015.1_ASM164301v1_genomic.fna |
| 2154 | <i>Neomicrococcus aestuarii</i>         | GCA_001887245.1_ASM188724v1_genomic.fna |
| 2155 | <i>Microbacterium paludicola</i>        | GCA_001887285.1_ASM188728v1_genomic.fna |
| 2156 | <i>Agromyces aureus</i>                 | GCA_001660485.1_ASM166048v1_genomic.fna |
| 2157 | <i>Pelobacter acetylenicus</i>          | GCA_001888165.1_ASM188816v1_genomic.fna |
| 2158 | <i>Bacteroides caecimuris</i>           | GCA_001688725.2_ASM168872v2_genomic.fna |
| 2159 | <i>Mycoplasma pullorum</i>              | GCA_001900245.1_ASM190024v1_genomic.fna |
| 2160 | <i>Paenibacillus xylanexedens</i>       | GCA_001908275.1_ASM190827v1_genomic.fna |
| 2161 | <i>Kiritimatiella glycovorans</i>       | GCA_001017655.1_ASM101765v1_genomic.fna |
| 2162 | <i>Minicystis rosea</i>                 | GCA_001931535.1_ASM193153v1_genomic.fna |
| 2163 | <i>Weissella jogaejeotgali</i>          | GCA_001932615.1_ASM193261v1_genomic.fna |
| 2164 | <i>Borrelia mayonii</i>                 | GCA_001945665.1_ASM194566v1_genomic.fna |
| 2165 | <i>Streptococcus acidominimus</i>       | GCA_900187245.1_51470_D02_genomic.fna   |
| 2166 | <i>Thauera chlorobenzoica</i>           | GCA_001922305.1_ASM192230v1_genomic.fna |
| 2167 | <i>Ndongobacter massiliensis</i>        | GCA_900120375.1_PRJEB18029_genomic.fna  |
| 2168 | <i>Corynebacterium aquilae</i>          | GCA_001941445.1_ASM194144v1_genomic.fna |
| 2169 | <i>Corynebacterium frankenforstense</i> | GCA_001941485.1_ASM194148v1_genomic.fna |
| 2170 | <i>Corynebacterium sphenisci</i>        | GCA_001941505.1_ASM194150v1_genomic.fna |
| 2171 | <i>Corynebacterium phocae</i>           | GCA_001941565.1_ASM194156v1_genomic.fna |
| 2172 | <i>Massilia putida</i>                  | GCA_001941825.1_ASM194182v1_genomic.fna |
| 2173 | <i>Gramella flava</i>                   | GCA_001951155.1_ASM195115v1_genomic.fna |



|      |                                          |                                         |
|------|------------------------------------------|-----------------------------------------|
| 2174 | <i>Paludisphaera borealis</i>            | GCA_001956985.1_ASM195698v1_genomic.fna |
| 2175 | <i>Bartonella apis</i>                   | GCA_002007565.1_ASM200756v1_genomic.fna |
| 2176 | <i>Ezakiella massiliensis</i>            | GCA_900120165.1_PRJEB15652_genomic.fna  |
| 2177 | <i>Lachnoclostridium phocaeense</i>      | GCA_900120345.1_PRJEB18024_genomic.fna  |
| 2178 | <i>Halioglobus pacificus</i>             | GCA_001953075.1_ASM195307v1_genomic.fna |
| 2179 | <i>Betaproteobacteria bacterium</i>      | GCA_001953215.1_ASM195321v1_genomic.fna |
| 2180 | <i>Negativicoccus massiliensis</i>       | GCA_900155405.1_PRJEB18760_genomic.fna  |
| 2181 | <i>Rhodoferrax saidenbachensis</i>       | GCA_001955715.1_ASM195571v1_genomic.fna |
| 2182 | <i>Tateyamaria omphalii</i>              | GCA_001969365.1_ASM196936v1_genomic.fna |
| 2183 | <i>Thiobacimonas profunda</i>            | GCA_001969385.1_ASM196938v1_genomic.fna |
| 2184 | <i>Spiribacter curvatus</i>              | GCA_000485905.1_ASM48590v1_genomic.fna  |
| 2185 | <i>Hymenobacter sedentarius</i>          | GCA_001507645.1_ASM150764v1_genomic.fna |
| 2186 | <i>Dehalogenimonas formicexedens</i>     | GCA_001953175.1_ASM195317v1_genomic.fna |
| 2187 | <i>Bacillus weihaiensis</i>              | GCA_001889165.1_ASM188916v1_genomic.fna |
| 2188 | <i>Achromobacter insolitus</i>           | GCA_001971645.1_ASM197164v1_genomic.fna |
| 2189 | <i>Lutibacter profundus</i>              | GCA_001543325.1_ASM154332v1_genomic.fna |
| 2190 | <i>Fuerstia marisgermanicae</i>          | GCA_001983935.1_ASM198393v1_genomic.fna |
| 2191 | <i>Streptomyces autolyticus</i>          | GCA_001983975.1_ASM198397v1_genomic.fna |
| 2192 | <i>Halioglobus japonicus</i>             | GCA_001983995.1_ASM198399v1_genomic.fna |
| 2193 | <i>Lacinutrix venerupis</i>              | GCA_001971745.1_ASM197174v1_genomic.fna |
| 2194 | <i>Proteiniphilum saccharofermentans</i> | GCA_900095135.1_M36_genomic.fna         |
| 2195 | <i>Microbacterium aurum</i>              | GCA_001974985.1_ASM197498v1_genomic.fna |
| 2196 | <i>Pelagibaca abyssi</i>                 | GCA_001975705.1_ASM197570v1_genomic.fna |
| 2197 | <i>Pseudodesulfovibrio indicus</i>       | GCA_001563225.1_ASM156322v1_genomic.fna |
| 2198 | <i>Flavobacterium crassostreae</i>       | GCA_001831475.1_ASM183147v1_genomic.fna |
| 2199 | <i>Acinetobacter larvae</i>              | GCA_001704115.1_ASM170411v1_genomic.fna |
| 2200 | <i>Spirosoma montaniterrae</i>           | GCA_001988955.1_ASM198895v1_genomic.fna |
| 2201 | <i>Auricoccus indicus</i>                | GCA_001989575.1_ASM198957v1_genomic.fna |
| 2202 | <i>Phycisphaerae bacterium</i>           | GCA_001997385.1_ASM199738v1_genomic.fna |
| 2203 | <i>Erysipelothrix larvae</i>             | GCA_001545095.1_ASM154509v1_genomic.fna |
| 2204 | <i>Marinobacter salinus</i>              | GCA_001854125.1_ASM185412v1_genomic.fna |
| 2205 | <i>Leuconostoc garlicum</i>              | GCA_001998805.1_ASM199880v1_genomic.fna |
| 2206 | <i>Tessaracoccus flavescens</i>          | GCA_001998865.1_ASM199886v1_genomic.fna |
| 2207 | <i>Vagococcus penaei</i>                 | GCA_001998885.1_ASM199888v1_genomic.fna |

|      |                                         |                                         |
|------|-----------------------------------------|-----------------------------------------|
| 2208 | <i>Pseudoalteromonas aliena</i>         | GCA_001999225.1_ASM199922v1_genomic.fna |
| 2209 | <i>Phycisphaerae bacterium</i>          | GCA_001999965.1_ASM199996v1_genomic.fna |
| 2210 | <i>Desulfotomaculum ferrireducens</i>   | GCA_002005145.1_ASM200514v1_genomic.fna |
| 2211 | <i>Novibacillus thermophilus</i>        | GCA_002005165.1_ASM200516v1_genomic.fna |
| 2212 | <i>Shewanella psychrophila</i>          | GCA_002005305.1_ASM200530v1_genomic.fna |
| 2213 | <i>Paenalcogenes hominis</i>            | GCA_002005365.1_ASM200536v1_genomic.fna |
| 2214 | <i>Phycisphaerae bacterium</i>          | GCA_002007645.1_ASM200764v1_genomic.fna |
| 2215 | <i>Mycobacterium litorale</i>           | GCA_002007745.1_ASM200774v1_genomic.fna |
| 2216 | <i>Komagataeibacter nataicola</i>       | GCA_002009295.1_ASM200929v1_genomic.fna |
| 2217 | <i>Neosasaia chiangmaiensis</i>         | GCA_002005465.1_ASM200546v1_genomic.fna |
| 2218 | <i>Anaerococcus mediterraneensis</i>    | GCA_900128415.1_PRJEB15655_genomic.fna  |
| 2219 | <i>Campylobacter pinnipediorum</i>      | GCA_002021925.1_ASM202192v1_genomic.fna |
| 2220 | <i>Elizabethkingia endophytica</i>      | GCA_002022045.1_ASM202204v1_genomic.fna |
| 2221 | <i>Ochrobactrum pituitosum</i>          | GCA_002025625.1_ASM202562v1_genomic.fna |
| 2222 | <i>Curtobacterium pusillum</i>          | GCA_002025645.1_ASM202564v1_genomic.fna |
| 2223 | <i>Alkalitalea saponilacus</i>          | GCA_002201795.1_ASM220179v1_genomic.fna |
| 2224 | <i>Phoenicibacter massiliensis</i>      | GCA_900169485.1_PRJEB19959_genomic.fna  |
| 2225 | <i>Spirosoma aerolatum</i>              | GCA_002056795.1_ASM205679v1_genomic.fna |
| 2226 | <i>Nitrospira japonica</i>              | GCA_900169565.1_NSJP_Ch1_genomic.fna    |
| 2227 | <i>Halomicronema hongdechloris</i>      | GCA_002075285.2_ASM207528v2_genomic.fna |
| 2228 | <i>Shewanella japonica</i>              | GCA_002075795.1_ASM207579v1_genomic.fna |
| 2229 | <i>Mycobacterium paraintracellulare</i> | GCA_000276825.1_ASM27682v1_genomic.fna  |
| 2230 | <i>Parasaccharibacter apium</i>         | GCA_002079945.1_ASM207994v1_genomic.fna |
| 2231 | <i>Streptomyces gilvosporeus</i>        | GCA_002082195.1_ASM208219v1_genomic.fna |
| 2232 | <i>Kitasatospora albolonga</i>          | GCA_002082585.1_ASM208258v1_genomic.fna |
| 2233 | <i>Christensenella massiliensis</i>     | GCA_900155415.1_PRJEB13909b_genomic.fna |
| 2234 | <i>Spirosoma rigui</i>                  | GCA_002067135.1_ASM206713v1_genomic.fna |
| 2235 | <i>Blattabacterium cuenoti</i>          | GCA_000348805.1_ASM34880v1_genomic.fna  |
| 2236 | <i>Chromatiaceae bacterium</i>          | GCA_002009425.1_ASM200942v1_genomic.fna |
| 2237 | <i>Mycobacterium marseillense</i>       | GCA_002285715.1_ASM228571v1_genomic.fna |
| 2238 | <i>Pseudomonas versuta</i>              | GCA_001294575.1_ASM129457v1_genomic.fna |
| 2239 | <i>Cnuibacter physcomitrellae</i>       | GCA_002096055.1_ASM209605v1_genomic.fna |
| 2240 | <i>Halobacillus mangrovi</i>            | GCA_002097535.1_ASM209753v1_genomic.fna |
| 2241 | <i>Pseudomonas mesoacidophila</i>       | GCA_002097715.1_ASM209771v1_genomic.fna |

|      |                                       |                                                               |
|------|---------------------------------------|---------------------------------------------------------------|
| 2242 | <i>Staphylococcus lutrae</i>          | GCA_002101335.1_ASM210133v1_genomic.fna                       |
| 2243 | <i>Pantoea alhagi</i>                 | GCA_002101395.1_ASM210139v1_genomic.fna                       |
| 2244 | <i>Alcanivorax xenomutans</i>         | GCA_002072815.1_ASM207281v1_genomic.fna                       |
| 2245 | <i>Paracoccus contaminans</i>         | GCA_002105555.1_ASM210555v1_genomic.fna                       |
| 2246 | <i>Rhizobacter gummiphilus</i>        | GCA_002116905.1_ASM211690v1_genomic.fna                       |
| 2247 | <i>Phycisphaerae bacterium</i>        | GCA_002117005.1_ASM211700v1_genomic.fna                       |
| 2248 | <i>Oceanicoccus sagamiensis</i>       | GCA_002117105.1_ASM211710v1_genomic.fna                       |
| 2249 | <i>Methylocystis bryophila</i>        | GCA_002117405.1_ASM211740v1_genomic.fna                       |
| 2250 | <i>Ketogulonicigenium robustum</i>    | GCA_002117445.1_ASM211744v1_genomic.fna                       |
| 2251 | <i>Methylobacterium zatmanii</i>      | GCA_002117815.1_ASM211781v1_genomic.fna                       |
| 2252 | <i>Ruminococcaceae bacterium</i>      | GCA_002119605.1_ASM211960v1_genomic.fna                       |
| 2253 | <i>Pseudorhodoplanes sinuspersici</i> | GCA_002119765.1_ASM211976v1_genomic.fna                       |
| 2254 | <i>Macrococcus canis</i>              | GCA_002119805.1_ASM211980v1_genomic.fna                       |
| 2255 | <i>Sphingobacteriaceae bacterium</i>  | GCA_002151545.1_ASM215154v1_genomic.fna                       |
| 2256 | <i>Kushneria marisflavi</i>           | GCA_002157205.1_ASM215720v1_genomic.fna                       |
| 2257 | <i>Agarilytica rhodophyticola</i>     | GCA_002157225.1_ASM215722v1_genomic.fna                       |
| 2258 | <i>Halomonas aestuarii</i>            | GCA_001886615.1_ASM188661v1_genomic.fna                       |
| 2259 | <i>Gordonibacter massiliensis</i>     | GCA_900170005.1_PRJEB19975_genomic.fna                        |
| 2260 | <i>Glutamicibacter halophytocola</i>  | GCA_001302565.1_ASM130256v1_genomic.fna                       |
| 2261 | <i>Comamonas serinivorans</i>         | GCA_002158865.1_ASM215886v1_genomic.fna                       |
| 2262 | <i>Oceanisphaera profunda</i>         | GCA_002157895.1_ASM215789v1_genomic.fna                       |
| 2263 | <i>Gordonibacter urolithinfaciens</i> | GCA_900199375.1_G142160_polished_assembly_ID17483_genomic.fna |
| 2264 | <i>Spiroplasma clarkii</i>            | GCA_002163565.1_ASM216356v1_genomic.fna                       |
| 2265 | <i>Nostocales cyanobacterium</i>      | GCA_002163975.1_ASM216397v1_genomic.fna                       |
| 2266 | <i>Luteitalea pratensis</i>           | GCA_001618865.1_ASM161886v1_genomic.fna                       |
| 2267 | <i>Herbinix luporum</i>               | GCA_900070325.1_SD1D_genomic.fna                              |
| 2268 | <i>Oleiphilus messinensis</i>         | GCA_002162375.1_ASM216237v1_genomic.fna                       |
| 2269 | <i>Thioclava nitratreducens</i>       | GCA_001940525.2_ASM194052v2_genomic.fna                       |
| 2270 | <i>Brevefilum fermentans</i>          | GCA_900184705.1_CAMBI-1_genomic.fna                           |
| 2271 | <i>Paenibacillus donghaensis</i>      | GCA_002192415.1_ASM219241v1_genomic.fna                       |
| 2272 | <i>Streptomyces albireticuli</i>      | GCA_002192455.1_ASM219245v1_genomic.fna                       |
| 2273 | <i>Methylovulum psychrotolerans</i>   | GCA_002209385.1_ASM220938v1_genomic.fna                       |
| 2274 | <i>Idiomarina piscisalsi</i>          | GCA_002211765.1_ASM221176v1_genomic.fna                       |
| 2275 | <i>Francisella haliotida</i>          | GCA_002211785.1_ASM221178v1_genomic.fna                       |

|      |                                                 |                                                          |
|------|-------------------------------------------------|----------------------------------------------------------|
| 2276 | <i>Diaphorobacter polyhydroxybutyrativorans</i> | GCA_002214645.1_ASM221464v1_genomic.fna                  |
| 2277 | <i>Shewanella marisflavi</i>                    | GCA_002215585.1_ASM221558v1_genomic.fna                  |
| 2278 | <i>Thalassotalea crassostreae</i>               | GCA_001831495.1_ASM183149v1_genomic.fna                  |
| 2279 | <i>Phaeobacter porticola</i>                    | GCA_001888185.1_ASM188818v1_genomic.fna                  |
| 2280 | <i>Paraphotobacterium marinum</i>               | GCA_002216855.1_ASM221685v1_genomic.fna                  |
| 2281 | <i>Shewanella bicestria</i>                     | GCA_002216875.1_ASM221687v1_genomic.fna                  |
| 2282 | <i>Sphingorhabdus flavimaris</i>                | GCA_002218195.1_ASM221819v1_genomic.fna                  |
| 2283 | <i>Pseudoalteromonas nigrifaciens</i>           | GCA_002221505.1_ASM222150v1_genomic.fna                  |
| 2284 | <i>Pseudoalteromonas espejiana</i>              | GCA_002221525.1_ASM222152v1_genomic.fna                  |
| 2285 | <i>Vitreoscilla filiformis</i>                  | GCA_002222655.1_ASM222265v1_genomic.fna                  |
| 2286 | <i>Virgibacillus necropolis</i>                 | GCA_002224365.1_ASM222436v1_genomic.fna                  |
| 2287 | <i>Dehalobacterium formicoaceticum</i>          | GCA_002224645.1_ASM222464v1_genomic.fna                  |
| 2288 | <i>Legionella clemsonensis</i>                  | GCA_002240035.1_ASM224003v1_genomic.fna                  |
| 2289 | <i>Flavobacterium communis</i>                  | GCA_001857965.1_ASM185796v1_genomic.fna                  |
| 2290 | <i>Herminiimonas arsenitoxidans</i>             | GCA_900130075.1_Herminiimonas_arsenitoxidans_genomic.fna |
| 2291 | <i>Pseudoalteromonas piratica</i>               | GCA_000788395.1_ASM78839v1_genomic.fna                   |
| 2292 | <i>Geobacillus lituanicus</i>                   | GCA_002243605.1_ASM224360v1_genomic.fna                  |
| 2293 | <i>Tumebacillus algifacis</i>                   | GCA_002243515.1_ASM224351v1_genomic.fna                  |
| 2294 | <i>Actinoalloteichus hoggarensis</i>            | GCA_002234535.1_ASM223453v1_genomic.fna                  |
| 2295 | <i>Zobellella denitrificans</i>                 | GCA_002407485.1_ASM240748v1_genomic.fna                  |
| 2296 | <i>Bacterioplanes sanyensis</i>                 | GCA_002237535.1_ASM223753v1_genomic.fna                  |
| 2297 | <i>Spiroplasma corruscae</i>                    | GCA_002237575.1_ASM223757v1_genomic.fna                  |
| 2298 | <i>Erythrobacter flavus</i>                     | GCA_002237615.1_ASM223761v1_genomic.fna                  |
| 2299 | <i>Marinobacterium aestuarii</i>                | GCA_001651805.1_ASM165180v1_genomic.fna                  |
| 2300 | <i>Staphylococcus muscae</i>                    | GCA_900187005.1_50569_B01_genomic.fna                    |
| 2301 | <i>Staphylococcus stepanovicii</i>              | GCA_900187075.1_50432_F01_genomic.fna                    |
| 2302 | <i>Chryseobacterium taklimakanense</i>          | GCA_900187185.1_50618_E01_genomic.fna                    |
| 2303 | <i>Veillonella rodentium</i>                    | GCA_900187285.1_51342_C02_genomic.fna                    |
| 2304 | <i>Staphylococcus piscifermentans</i>           | GCA_900186985.1_50377_C01_genomic.fna                    |
| 2305 | <i>Tenacibaculum jejuense</i>                   | GCA_900198195.1_Tjejuense_V1_genomic.fna                 |
| 2306 | <i>Bacillus kochii</i>                          | GCA_002276165.1_ASM227616v1_genomic.fna                  |
| 2307 | <i>Actinobacteria bacterium</i>                 | GCA_002284855.1_ASM228485v1_genomic.fna                  |
| 2308 | <i>Actinobacteria bacterium</i>                 | GCA_002284875.1_ASM228487v1_genomic.fna                  |
| 2309 | <i>Actinobacteria bacterium</i>                 | GCA_002284895.1_ASM228489v1_genomic.fna                  |

|      |                                        |                                                                           |
|------|----------------------------------------|---------------------------------------------------------------------------|
| 2310 | <i>Actinobacteria bacterium</i>        | GCA_002284915.1_ASM228491v1_genomic.fna                                   |
| 2311 | <i>Actinomyces gaoshouyui</i>          | GCA_002076915.1_ASM207691v1_genomic.fna                                   |
| 2312 | <i>Thermogutta terrifontis</i>         | GCA_002277955.1_ASM227795v1_genomic.fna                                   |
| 2313 | <i>Mycobacterium dioxanotrophicus</i>  | GCA_002157835.1_ASM215783v1_genomic.fna                                   |
| 2314 | <i>Corynebacterium glaucum</i>         | GCA_002287505.1_ASM228750v1_genomic.fna                                   |
| 2315 | <i>Kushneria konosiri</i>              | GCA_002155145.1_ASM215514v1_genomic.fna                                   |
| 2316 | <i>Gibbsiella quercinecans</i>         | GCA_002291425.1_ASM229142v1_genomic.fna                                   |
| 2317 | <i>Mycobacterium lepraemurium</i>      | GCA_002291465.1_ASM229146v1_genomic.fna                                   |
| 2318 | <i>Capnocytophaga leadbetteri</i>      | GCA_002302615.1_ASM230261v1_genomic.fna                                   |
| 2319 | <i>Capnocytophaga stomatis</i>         | GCA_002302635.1_ASM230263v1_genomic.fna                                   |
| 2320 | <i>Verrucomicrobia bacterium</i>       | GCA_002310495.1_ASM231049v1_genomic.fna                                   |
| 2321 | <i>Microbulbifer aggregans</i>         | GCA_001750105.1_ASM175010v1_genomic.fna                                   |
| 2322 | <i>Janthinobacterium svalbardensis</i> | GCA_002327145.1_ASM232714v1_genomic.fna                                   |
| 2323 | <i>Trichormus variabilis</i>           | GCA_000204075.1_ASM20407v1_genomic.fna                                    |
| 2324 | <i>Hydrogenophaga crassostreae</i>     | GCA_001761385.1_ASM176138v1_genomic.fna                                   |
| 2325 | <i>Streptococcus troglodytae</i>       | GCA_002355215.1_ASM235521v1_genomic.fna                                   |
| 2326 | <i>Rhizorhabdus dicambivorans</i>      | GCA_002355275.1_ASM235527v1_genomic.fna                                   |
| 2327 | <i>Variibacter gotjawalensis</i>       | GCA_002355335.1_ASM235533v1_genomic.fna                                   |
| 2328 | <i>Aneurinibacillus soli</i>           | GCA_002355375.1_ASM235537v1_genomic.fna                                   |
| 2329 | <i>Microcella alkaliphila</i>          | GCA_002355395.1_Microcella_alkaliphila_JAM_AC0309_assembly_01_genomic.fna |
| 2330 | <i>Sulfurifustis variabilis</i>        | GCA_002355415.1_ASM235541v1_genomic.fna                                   |
| 2331 | <i>Mucilaginibacter gotjawali</i>      | GCA_002355435.1_ASM235543v1_genomic.fna                                   |
| 2332 | <i>Aurantimicrobium minutum</i>        | GCA_002355535.1_ASM235553v1_genomic.fna                                   |
| 2333 | <i>Sulfuricaulis limicola</i>          | GCA_002355735.1_ASM235573v1_genomic.fna                                   |
| 2334 | <i>Marinifilaceae bacterium</i>        | GCA_002356295.1_ASM235629v1_genomic.fna                                   |
| 2335 | <i>Mycobacterium shigaense</i>         | GCA_002356315.1_ASM235631v1_genomic.fna                                   |
| 2336 | <i>Mycobacterium stephanolepidis</i>   | GCA_002356335.1_ASM235633v1_genomic.fna                                   |
| 2337 | <i>Thiohalobacter thiocyanaticus</i>   | GCA_002356355.1_ASM235635v1_genomic.fna                                   |
| 2338 | <i>Rhodobacteraceae bacterium</i>      | GCA_002356635.1_ASM235663v1_genomic.fna                                   |
| 2339 | <i>Ichthyobacterium seriolicida</i>    | GCA_002369955.1_ASM236995v1_genomic.fna                                   |
| 2340 | <i>Murdochiella vaginalis</i>          | GCA_900119705.1_PRJEB14245_genomic.fna                                    |
| 2341 | <i>Mesoplasma lactucaae</i>            | GCA_002441935.1_ASM244193v1_genomic.fna                                   |
| 2342 | <i>Staphylococcus nepalensis</i>       | GCA_002442895.1_ASM244289v1_genomic.fna                                   |
| 2343 | <i>Pseudodesulfovibrio profundus</i>   | GCA_900217235.1_DPRO_PRJEB22548_v1_genomic.fna                            |

|      |                                      |                                               |
|------|--------------------------------------|-----------------------------------------------|
| 2344 | <i>Sodalis endosymbiont</i>          | GCA_900161835.1_HBAv1_genomic.fna             |
| 2345 | <i>Celeribacter manganoxidans</i>    | GCA_002504165.1_ASM250416v1_genomic.fna       |
| 2346 | <i>Altererythrobacter mangrovi</i>   | GCA_002269345.1_ASM226934v1_genomic.fna       |
| 2347 | <i>Brachybacterium ginsengisoli</i>  | GCA_002407065.1_ASM240706v1_genomic.fna       |
| 2348 | <i>Phaeobacter piscinae</i>          | GCA_002407245.1_ASM240724v1_genomic.fna       |
| 2349 | <i>Phaeobacter piscinae</i>          | GCA_002412025.1_ASM241202v1_genomic.fna       |
| 2350 | <i>Staphylococcus nepalensis</i>     | GCA_002442935.1_ASM244293v1_genomic.fna       |
| 2351 | <i>Antarctobacter heliothermus</i>   | GCA_002237555.1_ASM223755v1_genomic.fna       |
| 2352 | <i>Neisseria zoodegmatis</i>         | GCA_900187305.1_51470_F02_genomic.fna         |
| 2353 | <i>Mycobacterium terrae</i>          | GCA_900187145.1_50818_H01_genomic.fna         |
| 2354 | <i>Janibacter indicus</i>            | GCA_001889125.1_ASM188912v1_genomic.fna       |
| 2355 | <i>Blattabacterium cuenoti</i>       | GCA_002355135.1_ASM235513v1_genomic.fna       |
| 2356 | <i>Celeribacter ethanolicus</i>      | GCA_002407265.1_ASM240726v1_genomic.fna       |
| 2357 | <i>Elizabethkingia endophytica</i>   | GCA_002022085.1_ASM202208v1_genomic.fna       |
| 2358 | <i>Campylobacter pinnipediorum</i>   | GCA_002021945.1_ASM202194v1_genomic.fna       |
| 2359 | <i>Filimonas lacunae</i>             | GCA_002355595.1_F._lacunae_YT21-2_genomic.fna |
| 2360 | <i>Bartonella apis</i>               | GCA_002007485.1_ASM200748v1_genomic.fna       |
| 2361 | <i>Borrelia mayonii</i>              | GCA_001936295.1_ASM193629v1_genomic.fna       |
| 2362 | <i>Corynebacterium cystitidis</i>    | GCA_900187295.1_52191_E01_genomic.fna         |
| 2363 | <i>Clostridium cochlearium</i>       | GCA_900187165.1_52121_G02_genomic.fna         |
| 2364 | <i>Clostridium formicaceticum</i>    | GCA_002080475.1_ASM208047v1_genomic.fna       |
| 2365 | <i>Pectobacterium parmentieri</i>    | GCA_001742145.1_ASM174214v1_genomic.fna       |
| 2366 | <i>Burkholderia stabilis</i>         | GCA_002356275.1_ASM235627v1_genomic.fna       |
| 2367 | <i>Bordetella bronchialis</i>        | GCA_001676745.1_ASM167674v1_genomic.fna       |
| 2368 | <i>Lactobacillus backii</i>          | GCA_001663655.1_ASM166365v1_genomic.fna       |
| 2369 | <i>Enterococcus thailandicus</i>     | GCA_002290025.1_ASM229002v1_genomic.fna       |
| 2370 | <i>Kluyvera georgiana</i>            | GCA_002211745.1_ASM221174v1_genomic.fna       |
| 2371 | <i>Ralstonia insidiosa</i>           | GCA_001663855.1_ASM166385v1_genomic.fna       |
| 2372 | <i>Polynucleobacter asymbioticus</i> | GCA_001874545.1_ASM187454v1_genomic.fna       |
| 2373 | <i>Pseudomonas koreensis</i>         | GCA_001654515.1_ASM165451v1_genomic.fna       |
| 2374 | <i>Planococcus maritimus</i>         | GCA_001687625.2_ASM168762v2_genomic.fna       |
| 2375 | <i>Collimonas pratensis</i>          | GCA_001584225.1_ASM158422v1_genomic.fna       |
| 2376 | <i>Enterobacter cloacae</i>          | GCA_000750275.1_ASM75027v1_genomic.fna        |
| 2377 | <i>Corynebacterium simulans</i>      | GCA_001586235.1_ASM158623v1_genomic.fna       |

|      |                                        |                                                          |
|------|----------------------------------------|----------------------------------------------------------|
| 2378 | <i>Paracoccus aminovorans</i>          | GCA_900005615.1_JCM7685_genomic.fna                      |
| 2379 | <i>Enterobacter kobei</i>              | GCA_001729765.1_ASM172976v1_genomic.fna                  |
| 2380 | <i>Alteromonas mediterranea</i>        | GCA_000310085.1_ASM31008v1_genomic.fna                   |
| 2381 | <i>Legionella spiritensis</i>          | GCA_900186965.1_50592_C01_genomic.fna                    |
| 2382 | <i>Legionella waltersii</i>            | GCA_900187095.1_51699_A01_genomic.fna                    |
| 2383 | <i>Enterococcus silesiacus</i>         | GCA_001465115.1_ASM146511v1_genomic.fna                  |
| 2384 | <i>Pseudoalteromonas issachenkonii</i> | GCA_002310795.1_ASM231079v1_genomic.fna                  |
| 2385 | <i>Bacillus glycinifermentans</i>      | GCA_002443095.1_ASM244309v1_genomic.fna                  |
| 2386 | <i>Lysobacter enzymogenes</i>          | GCA_002355975.1_ASM235597v1_genomic.fna                  |
| 2387 | <i>Bacillus paralicheniformis</i>      | GCA_000876525.1_ASM87652v1_genomic.fna                   |
| 2388 | <i>Streptomyces pactum</i>             | GCA_002005225.1_ASM200522v1_genomic.fna                  |
| 2389 | <i>Blastochloris viridis</i>           | GCA_001459775.1_Blastochloris_viridis_genome_genomic.fna |
| 2390 | <i>Lactobacillus paracollinoides</i>   | GCA_001702155.1_ASM170215v1_genomic.fna                  |
| 2391 | <i>Lactobacillus lindneri</i>          | GCA_001702115.1_ASM170211v1_genomic.fna                  |
| 2392 | <i>Mycobacterium chimaera</i>          | GCA_002166795.1_ASM216679v1_genomic.fna                  |
| 2393 | <i>Bosea vaviloviae</i>                | GCA_001741865.1_ASM174186v1_genomic.fna                  |
| 2394 | <i>Arthrobacter alpinus</i>            | GCA_001445575.1_ASM144557v1_genomic.fna                  |
| 2395 | <i>Lawsonella clevelandensis</i>       | GCA_001281505.1_ASM128150v1_genomic.fna                  |
| 2396 | <i>Oblitimonas alkaliphila</i>         | GCA_001267195.1_ASM126719v1_genomic.fna                  |
| 2397 | <i>Spiroplasma tauronicum</i>          | GCA_001513715.1_ASM151371v1_genomic.fna                  |
| 2398 | <i>Staphylococcus schleiferi</i>       | GCA_001188875.1_ASM118887v1_genomic.fna                  |
| 2399 | <i>Mycobacterium aurum</i>             | GCA_900078775.1_ASM90007877v1_genomic.fna                |
| 2400 | <i>Brenneria goodwinii</i>             | GCA_002291445.1_ASM229144v1_genomic.fna                  |
| 2401 | <i>Klebsiella quasipneumoniae</i>      | GCA_002240295.1_ASM224029v1_genomic.fna                  |
| 2402 | <i>Staphylococcus condimenti</i>       | GCA_001922405.1_ASM192240v1_genomic.fna                  |
| 2403 | <i>Pandoraea thiooxydans</i>           | GCA_001017775.3_ASM101777v3_genomic.fna                  |
| 2404 | <i>Brevibacterium flavum</i>           | GCA_001683055.1_ASM168305v1_genomic.fna                  |
| 2405 | <i>Ralstonia mannitolilytica</i>       | GCA_001628775.1_ASM162877v1_genomic.fna                  |
| 2406 | <i>Tatlockia micdadei</i>              | GCA_002085715.1_ASM208571v1_genomic.fna                  |
| 2407 | <i>Campylobacter iguaniorum</i>        | GCA_001483985.1_ASM148398v1_genomic.fna                  |
| 2408 | <i>Mycobacterium immunogenum</i>       | GCA_001677135.1_ASM167713v1_genomic.fna                  |
| 2409 | <i>Marinobacter salarius</i>           | GCA_002116735.1_ASM211673v1_genomic.fna                  |
| 2410 | <i>Pandoraea apista</i>                | GCA_001010785.1_ASM101078v1_genomic.fna                  |
| 2411 | <i>Pandoraea sputorum</i>              | GCA_900187205.1_52191_D01_genomic.fna                    |

|      |                                       |                                         |
|------|---------------------------------------|-----------------------------------------|
| 2412 | <i>Streptomyces pluripotens</i>       | GCA_000816465.4_ASM81646v4_genomic.fna  |
| 2413 | <i>Pseudomonas frederiksbergensis</i> | GCA_001952935.1_ASM195293v1_genomic.fna |
| 2414 | <i>Fusobacterium hwasookii</i>        | GCA_001455105.1_ASM145510v1_genomic.fna |
| 2415 | <i>Clostridium baratii</i>            | GCA_001991075.1_ASM199107v1_genomic.fna |
| 2416 | <i>Collimonas arenae</i>              | GCA_001584165.1_ASM158416v1_genomic.fna |
| 2417 | <i>Citrobacter braakii</i>            | GCA_002208845.1_ASM220884v1_genomic.fna |
| 2418 | <i>Klebsiella michiganensis</i>       | GCA_000276705.2_ASM27670v2_genomic.fna  |
| 2419 | <i>Amycolatopsis lurida</i>           | GCA_000749465.2_ASM74946v2_genomic.fna  |
| 2420 | <i>Caulobacter henricii</i>           | GCA_001414055.1_ASM141405v1_genomic.fna |
| 2421 | <i>Corynebacterium imitans</i>        | GCA_900187215.1_52295_D01_genomic.fna   |
| 2422 | <i>Chryseobacterium piperi</i>        | GCA_002285635.1_ASM228563v1_genomic.fna |
| 2423 | <i>Alteromonas australica</i>         | GCA_000934525.1_ASM93452v1_genomic.fna  |
| 2424 | <i>Sinorhizobium americanum</i>       | GCA_001889105.1_ASM188910v1_genomic.fna |
| 2425 | <i>Kozakia baliensis</i>              | GCA_001787355.1_ASM178735v1_genomic.fna |
| 2426 | <i>Edwardsiella piscicida</i>         | GCA_001729265.1_ASM172926v1_genomic.fna |
| 2427 | <i>Mycoplasma californicum</i>        | GCA_000829335.1_ASM82933v1_genomic.fna  |
| 2428 | <i>Legionella lansingensis</i>        | GCA_900187355.1_51342_E02_genomic.fna   |
| 2429 | <i>Lysobacter capsici</i>             | GCA_002355295.1_ASM235529v1_genomic.fna |
| 2430 | <i>Bacillus velezensis</i>            | GCA_000283695.1_ASM28369v1_genomic.fna  |
| 2431 | <i>Ensifer sojae</i>                  | GCA_002288525.1_ASM228852v1_genomic.fna |
| 2432 | <i>Burkholderia lata</i>              | GCA_001718575.1_ASM171857v1_genomic.fna |
| 2433 | <i>Chlamydia gallinacea</i>           | GCA_002007725.1_ASM200772v1_genomic.fna |
| 2434 | <i>Kosakonia sacchari</i>             | GCA_001683395.1_ASM168339v1_genomic.fna |
| 2435 | <i>Bifidobacterium kashiwanohense</i> | GCA_001042615.1_ASM104261v1_genomic.fna |
| 2436 | <i>Pandoraea pnomenusa</i>            | GCA_000504585.2_ASM50458v2_genomic.fna  |
| 2437 | <i>Pseudomonas mosselii</i>           | GCA_002309555.1_ASM230955v1_genomic.fna |
| 2438 | <i>Capnocytophaga haemolytica</i>     | GCA_900187255.1_51184_F02_genomic.fna   |
| 2439 | <i>Streptomyces lydicus</i>           | GCA_000952035.2_ASM95203v2_genomic.fna  |
| 2440 | <i>Desulfococcus multivorans</i>      | GCA_002009335.2_ASM200933v2_genomic.fna |
| 2441 | <i>Campylobacter subantarcticus</i>   | GCA_000816305.1_ASM81630v1_genomic.fna  |
| 2442 | <i>Clostridium chauvoei</i>           | GCA_002327185.1_ASM232718v1_genomic.fna |
| 2443 | <i>Bradyrhizobium diazoefficiens</i>  | GCA_001549695.1_ASM154969v1_genomic.fna |
| 2444 | <i>Cellulophaga baltica</i>           | GCA_000477035.2_ASM47703v2_genomic.fna  |
| 2445 | <i>Clostridium saccharobutylicum</i>  | GCA_002003285.1_ASM200328v1_genomic.fna |



|      |                                        |                                         |
|------|----------------------------------------|-----------------------------------------|
| 2446 | <i>Clostridium autoethanogenum</i>     | GCA_001484725.1_ASM148472v1_genomic.fna |
| 2447 | <i>Mesoplasma chauliocola</i>          | GCA_002290085.1_ASM229008v1_genomic.fna |
| 2448 | <i>Enterobacter lignolyticus</i>       | GCA_001461805.1_ASM146180v1_genomic.fna |
| 2449 | <i>Paenibacillus durus</i>             | GCA_000993825.1_ASM99382v1_genomic.fna  |
| 2450 | <i>Serratia fonticola</i>              | GCA_001514455.1_ASM151445v1_genomic.fna |
| 2451 | <i>Bordetella hinzii</i>               | GCA_001078295.1_ASM107829v1_genomic.fna |
| 2452 | <i>Azotobacter chroococcum</i>         | GCA_002220155.1_ASM222015v1_genomic.fna |
| 2453 | <i>Dyella japonica</i>                 | GCA_000725385.1_ASM72538v1_genomic.fna  |
| 2454 | <i>Bacillus cohnii</i>                 | GCA_002250055.1_ASM225005v1_genomic.fna |
| 2455 | <i>Bifidobacterium thermophilum</i>    | GCA_000347695.1_ASM34769v1_genomic.fna  |
| 2456 | <i>Mycobacterium yongonense</i>        | GCA_002148175.1_ASM214817v1_genomic.fna |
| 2457 | <i>Nocardiopsis gilva</i>              | GCA_002263495.1_ASM226349v1_genomic.fna |
| 2458 | <i>Borrelia miyamotoi</i>              | GCA_000807295.1_ASM80729v1_genomic.fna  |
| 2459 | <i>Rathayibacter toxicus</i>           | GCA_000875675.1_ASM87567v1_genomic.fna  |
| 2460 | <i>Aerococcus urinaeequi</i>           | GCA_001543205.1_ASM154320v1_genomic.fna |
| 2461 | <i>Sporosarcina ureae</i>              | GCA_002081995.1_ASM208199v1_genomic.fna |
| 2462 | <i>Staphylococcus pasteurii</i>        | GCA_002442915.1_ASM244291v1_genomic.fna |
| 2463 | <i>Mannheimia varigena</i>             | GCA_000521685.1_ASM52168v1_genomic.fna  |
| 2464 | <i>Streptomyces albulus</i>            | GCA_000963515.1_ASM96351v1_genomic.fna  |
| 2465 | <i>Lysobacter antibioticus</i>         | GCA_001442745.1_ASM144274v1_genomic.fna |
| 2466 | <i>Bifidobacterium pseudolongum</i>    | GCA_002282915.1_ASM228291v1_genomic.fna |
| 2467 | <i>Butyrivibrio hungatei</i>           | GCA_001858005.1_ASM185800v1_genomic.fna |
| 2468 | <i>Weissella ceti</i>                  | GCA_000732905.1_ASM73290v1_genomic.fna  |
| 2469 | <i>Corynebacterium stationis</i>       | GCA_001561975.1_ASM156197v1_genomic.fna |
| 2470 | <i>Brochothrix thermosphacta</i>       | GCA_002381265.1_ASM238126v1_genomic.fna |
| 2471 | <i>Raoultella ornithinolytica</i>      | GCA_000829965.1_ASM82996v1_genomic.fna  |
| 2472 | <i>Serratia liquefaciens</i>           | GCA_000975245.1_ASM97524v1_genomic.fna  |
| 2473 | <i>Tepidanaerobacter acetatoxydans</i> | GCA_000213235.1_ASM21323v1_genomic.fna  |
| 2474 | <i>Liberibacter crescens</i>           | GCA_001543305.1_ASM154330v1_genomic.fna |
| 2475 | <i>Desulfovibrio desulfuricans</i>     | GCA_000022125.1_ASM2212v1_genomic.fna   |
| 2476 | <i>Cellulosimicrobium cellulans</i>    | GCA_002162335.1_ASM216233v1_genomic.fna |
| 2477 | <i>Cystobacter fuscus</i>              | GCA_002305875.1_ASM230587v1_genomic.fna |
| 2478 | <i>Bibersteinia trehalosi</i>          | GCA_000521725.1_ASM52172v1_genomic.fna  |
| 2479 | <i>Clostridium stercorarium</i>        | GCA_000349885.2_ASM34988v2_genomic.fna  |

|      |                                               |                                         |
|------|-----------------------------------------------|-----------------------------------------|
| 2480 | <i>Citrobacter amalonaticus</i>               | GCA_001558935.1_ASM155893v1_genomic.fna |
| 2481 | <i>Achromobacter denitrificans</i>            | GCA_002205315.1_ASM220531v1_genomic.fna |
| 2482 | <i>Pseudomonas protegens</i>                  | GCA_000828695.1_ASM82869v1_genomic.fna  |
| 2483 | <i>Nitratireductor basaltis</i>               | GCA_001953055.1_ASM195305v1_genomic.fna |
| 2484 | <i>Sphingobium cloacae</i>                    | GCA_002355855.1_ASM235585v1_genomic.fna |
| 2485 | <i>Dickeya solani</i>                         | GCA_000758345.1_ASM75834v1_genomic.fna  |
| 2486 | <i>Sphingobacterium mizutaii</i>              | GCA_900187125.1_50592_G01_genomic.fna   |
| 2487 | <i>Lelliottia amnigena</i>                    | GCA_002393405.1_ASM239340v1_genomic.fna |
| 2488 | <i>Pseudothromotoga hypogea</i>               | GCA_000504105.1_ASM50410v1_genomic.fna  |
| 2489 | <i>Vibrio natriegens</i>                      | GCA_001680025.1_ASM168002v1_genomic.fna |
| 2490 | <i>Sphingopyxis macrogoltabida</i>            | GCA_001307295.1_ASM130729v1_genomic.fna |
| 2491 | <i>Chryseobacterium indologenes</i>           | GCA_002025665.1_ASM202566v1_genomic.fna |
| 2492 | <i>Cedecea neteri</i>                         | GCA_000758305.1_ASM75830v1_genomic.fna  |
| 2493 | <i>Elizabethkingia meningoseptica</i>         | GCA_002022145.1_ASM202214v1_genomic.fna |
| 2494 | <i>Pseudomonas parafulva</i>                  | GCA_002021815.1_ASM202181v1_genomic.fna |
| 2495 | <i>Pseudomonas citronellolis</i>              | GCA_001586155.1_ASM158615v1_genomic.fna |
| 2496 | <i>Pseudomonas azotoformans</i>               | GCA_002007785.1_ASM200778v1_genomic.fna |
| 2497 | <i>Nocardia seriolae</i>                      | GCA_002356035.1_ASM235603v1_genomic.fna |
| 2498 | <i>Thalassolituus oleivorans</i>              | GCA_000582555.1_ASM58255v1_genomic.fna  |
| 2499 | <i>Rhizobium gallicum</i>                     | GCA_001908615.1_ASM190861v1_genomic.fna |
| 2500 | <i>Corynebacterium halotolerans</i>           | GCA_000341345.1_ASM34134v1_genomic.fna  |
| 2501 | <i>Streptococcus merionis</i>                 | GCA_900187085.1_50624_E01_genomic.fna   |
| 2502 | <i>Aeribacillus pallidus</i>                  | GCA_002243625.1_ASM224362v1_genomic.fna |
| 2503 | <i>Xanthomonas translucens</i>                | GCA_900094325.1_PBas1_genomic.fna       |
| 2504 | <i>Capnocytophaga cynodegmi</i>               | GCA_002302475.1_ASM230247v1_genomic.fna |
| 2505 | <i>Mycoplasma bovigenitalium</i>              | GCA_002356075.1_ASM235607v1_genomic.fna |
| 2506 | <i>Bacillus safensis</i>                      | GCA_001938665.1_ASM193866v1_genomic.fna |
| 2507 | <i>Kosakonia radicincitans</i>                | GCA_001887675.1_ASM188767v1_genomic.fna |
| 2508 | <i>Bordetella holmesii</i>                    | GCA_000341465.2_ASM34146v2_genomic.fna  |
| 2509 | <i>Leptolyngbya boryana</i>                   | GCA_002142475.1_ASM214247v1_genomic.fna |
| 2510 | <i>Acidipropionibacterium acidipropionici</i> | GCA_000310065.1_ASM31006v1_genomic.fna  |
| 2511 | <i>Helicobacter cetorum</i>                   | GCA_000259255.1_ASM25925v1_genomic.fna  |
| 2512 | <i>Paraburkholderia caribensis</i>            | GCA_001449005.1_ASM144900v1_genomic.fna |
| 2513 | <i>Staphylococcus equorum</i>                 | GCA_001682235.1_ASM168223v1_genomic.fna |

|      |                                        |                                         |
|------|----------------------------------------|-----------------------------------------|
| 2514 | <i>Alteromonas stellipolaris</i>       | GCA_001433715.1_ASM143371v1_genomic.fna |
| 2515 | <i>Cutibacterium granulosum</i>        | GCA_900186975.1_50569_F01_genomic.fna   |
| 2516 | <i>Phaeobacter inhibens</i>            | GCA_000154765.2_ASM15476v2_genomic.fna  |
| 2517 | <i>Alcaligenes faecalis</i>            | GCA_001641975.2_ASM164197v2_genomic.fna |
| 2518 | <i>Amycolatopsis orientalis</i>        | GCA_000943515.2_ASM94351v2_genomic.fna  |
| 2519 | <i>Serratia plymuthica</i>             | GCA_000214235.1_ASM21423v1_genomic.fna  |
| 2520 | <i>Dermatophilus congolensis</i>       | GCA_900187045.1_51485_B01_genomic.fna   |
| 2521 | <i>Pseudomonas chlororaphis</i>        | GCA_000761195.1_ASM76119v1_genomic.fna  |
| 2522 | <i>Solibacillus silvestris</i>         | GCA_000271325.1_ASM27132v1_genomic.fna  |
| 2523 | <i>Geobacillus thermoleovorans</i>     | GCA_000236605.1_ASM23660v1_genomic.fna  |
| 2524 | <i>Sphingomonas melonis</i>            | GCA_002504265.1_ASM250426v1_genomic.fna |
| 2525 | <i>Moraxella osloensis</i>             | GCA_002355615.1_ASM235561v1_genomic.fna |
| 2526 | <i>Nocardia brasiliensis</i>           | GCA_002209125.1_ASM220912v1_genomic.fna |
| 2527 | <i>Pseudomonas fragi</i>               | GCA_002128325.1_ASM212832v1_genomic.fna |
| 2528 | <i>Xanthomonas fragariae</i>           | GCA_001705545.1_ASM170554v1_genomic.fna |
| 2529 | <i>Pseudoalteromonas luteoviolacea</i> | GCA_001750185.1_ASM175018v1_genomic.fna |
| 2530 | <i>Cronobacter malonaticus</i>         | GCA_001277215.2_ASM127721v2_genomic.fna |
| 2531 | <i>Rhizobium phaseoli</i>              | GCA_001664105.1_ASM166410v1_genomic.fna |
| 2532 | <i>Citrobacter werkmanii</i>           | GCA_002386385.1_ASM238638v1_genomic.fna |
| 2533 | <i>Pseudomonas monteilii</i>           | GCA_000510285.1_ASM51028v1_genomic.fna  |
| 2534 | <i>Mycoplasma canis</i>                | GCA_000988065.1_ASM98806v1_genomic.fna  |
| 2535 | <i>Elizabethkingia anophelis</i>       | GCA_000240095.3_ASM24009v3_genomic.fna  |
| 2536 | <i>Rickettsia rhipicephali</i>         | GCA_001442475.1_ASM144247v1_genomic.fna |
| 2537 | <i>Piscirickettsia salmonis</i>        | GCA_000756415.3_ASM75641v3_genomic.fna  |
| 2538 | <i>Francisella noatunensis</i>         | GCA_000505725.1_ASM50572v1_genomic.fna  |
| 2539 | <i>Francisella persica</i>             | GCA_001275365.1_ASM127536v1_genomic.fna |
| 2540 | <i>Mycobacterium thermoresistibile</i> | GCA_900187065.1_50465_H02_genomic.fna   |
| 2541 | <i>Enterococcus mundtii</i>            | GCA_002216705.1_ASM221670v1_genomic.fna |
| 2542 | <i>Rhodococcus fascians</i>            | GCA_001620305.1_ASM162030v1_genomic.fna |
| 2543 | <i>Leptospirillum ferriphilum</i>      | GCA_000695975.1_ASM69597v1_genomic.fna  |
| 2544 | <i>Flavobacterium columnare</i>        | GCA_001534645.1_ASM153464v1_genomic.fna |
| 2545 | <i>Rhodococcus pyridinivorans</i>      | GCA_002269365.1_ASM226936v1_genomic.fna |
| 2546 | <i>Campylobacter sputorum</i>          | GCA_002220755.1_ASM222075v1_genomic.fna |
| 2547 | <i>Campylobacter hyointestinalis</i>   | GCA_001643975.1_ASM164397v1_genomic.fna |

|      |                                               |                                                                |
|------|-----------------------------------------------|----------------------------------------------------------------|
| 2548 | <i>Enterococcus durans</i>                    | GCA_001267865.1_ASM126786v1_genomic.fna                        |
| 2549 | <i>Neorhizobium galegae</i>                   | GCA_000731295.1_RG1141_Ch_pA_pB_genomic.fna                    |
| 2550 | <i>Clostridium saccharoperbutylacetonicum</i> | GCA_002003305.1_ASM200330v1_genomic.fna                        |
| 2551 | <i>Streptomyces cattleya</i>                  | GCA_000237305.1_ASM23730v1_genomic.fna                         |
| 2552 | <i>Staphylococcus simiae</i>                  | GCA_900187055.1_50377_D01_genomic.fna                          |
| 2553 | <i>Halobacillus halophilus</i>                | GCA_002209425.1_ASM220942v1_genomic.fna                        |
| 2554 | <i>Azospirillum lipoferum</i>                 | GCA_000283655.1_ASM28365v1_genomic.fna                         |
| 2555 | <i>Mesorhizobium australicum</i>              | GCA_000230995.3_ASM23099v3_genomic.fna                         |
| 2556 | <i>Spiroplasma mirum</i>                      | GCA_000517365.1_ASM51736v1_genomic.fna                         |
| 2557 | <i>Moraxella bovoculi</i>                     | GCA_000988615.1_ASM98861v1_genomic.fna                         |
| 2558 | <i>Spiroplasma eriocheiris</i>                | GCA_002028345.1_ASM202834v1_genomic.fna                        |
| 2559 | <i>Actinobacillus suis</i>                    | GCA_900187155.1_51726_C01_genomic.fna                          |
| 2560 | <i>Pediococcus clausenii</i>                  | GCA_001702215.1_ASM170221v1_genomic.fna                        |
| 2561 | <i>Bacillus simplex</i>                       | GCA_002243645.1_ASM224364v1_genomic.fna                        |
| 2562 | <i>Rickettsia japonica</i>                    | GCA_002356695.1_ASM235669v1_genomic.fna                        |
| 2563 | <i>Pseudomonas pseudoalcaligenes</i>          | GCA_000953455.1_Ppseudo_Pac_genomic.fna                        |
| 2564 | <i>Staphylococcus xylosus</i>                 | GCA_000709415.1_ASM70941v1_genomic.fna                         |
| 2565 | <i>Rickettsia slovaca</i>                     | GCA_000252365.1_ASM25236v1_genomic.fna                         |
| 2566 | <i>Vibrio campbellii</i>                      | GCA_000464435.1_ASM46443v1_genomic.fna                         |
| 2567 | <i>Azospirillum brasilense</i>                | GCA_000632475.2_ASM63247v2_genomic.fna                         |
| 2568 | <i>Streptomyces ambofaciens</i>               | GCA_001632865.1_ASM163286v1_genomic.fna                        |
| 2569 | <i>Clostridium pasteurianum</i>               | GCA_000389635.1_ASM38963v1_genomic.fna                         |
| 2570 | <i>Tannerella forsythia</i>                   | GCA_001547855.1_ASM154785v1_genomic.fna                        |
| 2571 | <i>Prevotella intermedia</i>                  | GCA_000261025.1_ASM26102v1_genomic.fna                         |
| 2572 | <i>Cutibacterium avidum</i>                   | GCA_001714705.1_ASM171470v1_genomic.fna                        |
| 2573 | <i>Morganella morganii</i>                    | GCA_001558895.1_ASM155889v1_genomic.fna                        |
| 2574 | <i>Pediococcus damnosus</i>                   | GCA_001611035.1_ASM161103v1_genomic.fna                        |
| 2575 | <i>Micavibrio aeruginosavorus</i>             | GCA_000348745.1_ASM34874v1_genomic.fna                         |
| 2576 | <i>Tatumella citrea</i>                       | GCA_002163605.1_ASM216360v1_genomic.fna                        |
| 2577 | <i>Lactobacillus curvatus</i>                 | GCA_001663835.1_ASM166383v1_genomic.fna                        |
| 2578 | <i>Streptomyces venezuelae</i>                | GCA_001406115.1_Streptomyces_venezuelae_ATCC_15439_genomic.fna |
| 2579 | <i>Hafnia alvei</i>                           | GCA_001559255.1_ASM155925v1_genomic.fna                        |
| 2580 | <i>Selenomonas ruminantium</i>                | GCA_000284095.1_ASM28409v1_genomic.fna                         |
| 2581 | <i>Ornithobacterium rhinotracheale</i>        | GCA_000756505.1_ASM75650v1_genomic.fna                         |

|      |                                        |                                         |
|------|----------------------------------------|-----------------------------------------|
| 2582 | <i>Tetragenococcus halophilus</i>      | GCA_001712815.1_ASM171281v1_genomic.fna |
| 2583 | <i>Enterococcus hirae</i>              | GCA_001641305.1_ASM164130v1_genomic.fna |
| 2584 | <i>Burkholderia cepacia</i>            | GCA_000292915.1_ASM29291v1_genomic.fna  |
| 2585 | <i>Fervidobacterium pennivorans</i>    | GCA_001644665.1_ASM164466v1_genomic.fna |
| 2586 | <i>Pantoea agglomerans</i>             | GCA_001558735.1_ASM155873v1_genomic.fna |
| 2587 | <i>Melissococcus plutonius</i>         | GCA_000283975.1_ASM28397v1_genomic.fna  |
| 2588 | <i>Rickettsia amblyommatis</i>         | GCA_000284055.1_ASM28405v1_genomic.fna  |
| 2589 | <i>Pseudomonas brassicacearum</i>      | GCA_000585995.1_ASM58599v1_genomic.fna  |
| 2590 | <i>Mycobacterium abscessus</i>         | GCA_000758405.1_ASM75840v1_genomic.fna  |
| 2591 | <i>Paenibacillus mucilaginosus</i>     | GCA_000218915.1_ASM21891v1_genomic.fna  |
| 2592 | <i>Burkholderia gladioli</i>           | GCA_000194745.1_ASM19474v1_genomic.fna  |
| 2593 | <i>Aeromonas veronii</i>               | GCA_001593245.1_ASM159324v1_genomic.fna |
| 2594 | <i>Chlamydia pecorum</i>               | GCA_000470765.1_ASM47076v1_genomic.fna  |
| 2595 | <i>Xanthomonas gardneri</i>            | GCA_001908755.1_ASM190875v1_genomic.fna |
| 2596 | <i>Corynebacterium ulcerans</i>        | GCA_000215665.1_ASM21566v1_genomic.fna  |
| 2597 | <i>Staphylococcus pseudintermedius</i> | GCA_000189495.1_ASM18949v1_genomic.fna  |
| 2598 | <i>Lactobacillus farciminis</i>        | GCA_002706745.1_ASM270674v1_genomic.fna |
| 2599 | <i>Klebsiella aerogenes</i>            | GCA_000334515.1_ASM33451v1_genomic.fna  |
| 2600 | <i>Jonesia denitrificans</i>           | GCA_002209145.1_ASM220914v1_genomic.fna |
| 2601 | <i>Nocardiopsis dassonvillei</i>       | GCA_001877055.1_ASM187705v1_genomic.fna |
| 2602 | <i>Conexibacter woesei</i>             | GCA_000025265.1_ASM2526v1_genomic.fna   |
| 2603 | <i>Lactobacillus coryniformis</i>      | GCA_002706425.1_ASM270642v1_genomic.fna |
| 2604 | <i>Leuconostoc gelidum</i>             | GCA_000298875.1_ASM29887v1_genomic.fna  |
| 2605 | <i>Xanthomonas perforans</i>           | GCA_001908855.1_ASM190885v1_genomic.fna |
| 2606 | <i>Xanthomonas vesicatoria</i>         | GCA_001908815.1_ASM190881v1_genomic.fna |
| 2607 | <i>Weissella cibaria</i>               | GCA_001932695.1_ASM193269v1_genomic.fna |
| 2608 | <i>Prevotella dentalis</i>             | GCA_000242335.3_ASM24233v3_genomic.fna  |
| 2609 | <i>Enterobacter hormaechei</i>         | GCA_000807405.4_ASM80740v4_genomic.fna  |
| 2610 | <i>Rhodothermus marinus</i>            | GCA_000224745.1_ASM22474v1_genomic.fna  |
| 2611 | <i>Halomonas elongata</i>              | GCA_000196875.1_ASM19687v1_genomic.fna  |
| 2612 | <i>Pseudoxanthomonas suwonensis</i>    | GCA_000185965.1_ASM18596v1_genomic.fna  |
| 2613 | <i>Sphingobium yanoikuyae</i>          | GCA_002504085.1_ASM250408v1_genomic.fna |
| 2614 | <i>Eubacterium limosum</i>             | GCA_000152245.2_ASM15224v2_genomic.fna  |
| 2615 | <i>Staphylococcus simulans</i>         | GCA_002386185.1_ASM238618v1_genomic.fna |

|      |                                           |                                         |
|------|-------------------------------------------|-----------------------------------------|
| 2616 | <i>Mycoplasma hominis</i>                 | GCA_000767725.1_ASM76772v1_genomic.fna  |
| 2617 | <i>Vibrio anguillarum</i>                 | GCA_000462975.1_ASM46297v1_genomic.fna  |
| 2618 | <i>Vibrio scophthalmi</i>                 | GCA_001687805.1_ASM168780v1_genomic.fna |
| 2619 | <i>Aerococcus urinae</i>                  | GCA_000193205.1_ASM19320v1_genomic.fna  |
| 2620 | <i>Cellulophaga lytica</i>                | GCA_000750195.1_ASM75019v1_genomic.fna  |
| 2621 | <i>Capnocytophaga canimorsus</i>          | GCA_002302445.1_ASM230244v1_genomic.fna |
| 2622 | <i>Corynebacterium variabile</i>          | GCA_000179395.2_ASM17939v2_genomic.fna  |
| 2623 | <i>Pseudomonas fulva</i>                  | GCA_002688705.1_ASM268870v1_genomic.fna |
| 2624 | <i>Streptococcus parasanguinis</i>        | GCA_000262145.1_ASM26214v1_genomic.fna  |
| 2625 | <i>Brachyspira pilosicoli</i>             | GCA_000143725.1_ASM14372v1_genomic.fna  |
| 2626 | <i>Eggerthella lenta</i>                  | GCA_002148255.1_ASM214825v1_genomic.fna |
| 2627 | <i>Citrobacter freundii</i>               | GCA_001022155.1_ASM102215v1_genomic.fna |
| 2628 | <i>Ketogulonicigenium vulgare</i>         | GCA_000164885.1_ASM16488v1_genomic.fna  |
| 2629 | <i>Taylorella equigenitalis</i>           | GCA_000185745.1_ASM18574v1_genomic.fna  |
| 2630 | <i>Mycoplasma putrefaciens</i>            | GCA_000376625.1_ASM37662v1_genomic.fna  |
| 2631 | <i>Streptococcus gallolyticus</i>         | GCA_000027185.1_ASM2718v1_genomic.fna   |
| 2632 | <i>Pantoea vagans</i>                     | GCA_001506165.1_ASM150616v1_genomic.fna |
| 2633 | <i>Odoribacter splanchnicus</i>           | GCA_900187175.1_51342_A02_genomic.fna   |
| 2634 | <i>Amycolatopsis mediterranei</i>         | GCA_000220945.1_ASM22094v1_genomic.fna  |
| 2635 | <i>Mycoplasma suis</i>                    | GCA_000203215.1_ASM20321v1_genomic.fna  |
| 2636 | <i>Streptococcus anginosus</i>            | GCA_000463465.1_ASM46346v1_genomic.fna  |
| 2637 | <i>Pantoea ananatis</i>                   | GCA_000233595.1_ASM23359v1_genomic.fna  |
| 2638 | <i>Streptococcus constellatus</i>         | GCA_000463425.1_ASM46342v1_genomic.fna  |
| 2639 | <i>Staphylococcus lugdunensis</i>         | GCA_000270465.1_ASM27046v1_genomic.fna  |
| 2640 | <i>Lactobacillus amylovorus</i>           | GCA_000194115.1_ASM19411v1_genomic.fna  |
| 2641 | <i>Riemerella anatipestifer</i>           | GCA_000183155.1_ASM18315v1_genomic.fna  |
| 2642 | <i>Acinetobacter pittii</i>               | GCA_001577285.1_ASM157728v1_genomic.fna |
| 2643 | <i>Xanthomonas campestris</i>             | GCA_001854165.1_ASM185416v1_genomic.fna |
| 2644 | <i>Mesorhizobium ciceri</i>               | GCA_000185905.1_ASM18590v1_genomic.fna  |
| 2645 | <i>Ralstonia eutropha</i>                 | GCA_000009285.2_ASM928v2_genomic.fna    |
| 2646 | <i>Alicyclophilus denitrificans</i>       | GCA_000179015.2_ASM17901v2_genomic.fna  |
| 2647 | <i>Veillonella parvula</i>                | GCA_002005185.1_ASM200518v1_genomic.fna |
| 2648 | <i>Enterobacter asburiae</i>              | GCA_000632395.1_ASM63239v1_genomic.fna  |
| 2649 | <i>Corynebacterium pseudotuberculosis</i> | GCA_000143705.1_ASM14370v1_genomic.fna  |

|      |                                            |                                         |
|------|--------------------------------------------|-----------------------------------------|
| 2650 | <i>Parageobacillus thermoglucosidasius</i> | GCA_000178395.2_ASM17839v2_genomic.fna  |
| 2651 | <i>Sulfobacillus acidophilus</i>           | GCA_000237975.1_ASM23797v1_genomic.fna  |
| 2652 | <i>Vibrio coralliilyticus</i>              | GCA_000772065.1_ASM77206v1_genomic.fna  |
| 2653 | <i>Pediococcus acidilactici</i>            | GCA_001922325.1_ASM192232v1_genomic.fna |
| 2654 | <i>Vibrio mimicus</i>                      | GCA_001767355.1_ASM176735v1_genomic.fna |
| 2655 | <i>Vibrio fluvialis</i>                    | GCA_001952955.1_ASM195295v1_genomic.fna |
| 2656 | <i>Spirochaeta thermophila</i>             | GCA_000147075.1_ASM14707v1_genomic.fna  |
| 2657 | <i>Acinetobacter calcoaceticus</i>         | GCA_900093475.1_36734_D01_2_genomic.fna |
| 2658 | <i>Corynebacterium ammoniagenes</i>        | GCA_002005245.1_ASM200524v1_genomic.fna |
| 2659 | <i>Pseudomonas savastanoi</i>              | GCA_000164015.3_ASM16401v3_genomic.fna  |
| 2660 | <i>Xanthomonas fuscans</i>                 | GCA_001610795.1_ASM161079v1_genomic.fna |
| 2661 | <i>Acidovorax citrulli</i>                 | GCA_002441975.1_ASM244197v1_genomic.fna |
| 2662 | <i>Megamonas hypermegale</i>               | GCA_900187035.1_50279_G02_genomic.fna   |
| 2663 | <i>Achromobacter xylosoxidans</i>          | GCA_000165835.1_ASM16583v1_genomic.fna  |
| 2664 | <i>Streptococcus oralis</i>                | GCA_001983955.1_ASM198395v1_genomic.fna |
| 2665 | <i>Acinetobacter nosocomialis</i>          | GCA_002082665.1_ASM208266v1_genomic.fna |
| 2666 | <i>Klebsiella variicola</i>                | GCA_000812205.2_ASM81220v2_genomic.fna  |
| 2667 | <i>Bacillus atrophaeus</i>                 | GCA_000165925.1_ASM16592v1_genomic.fna  |
| 2668 | <i>Erysipelothrix rhusiopathiae</i>        | GCA_000404205.1_ASM40420v1_genomic.fna  |
| 2669 | <i>Oxalobacter formigenes</i>              | GCA_002127965.1_ASM212796v1_genomic.fna |
| 2670 | <i>Eikenella corrodens</i>                 | GCA_900187105.1_50618_F01_genomic.fna   |
| 2671 | <i>Staphylococcus capitis</i>              | GCA_002356175.1_ASM235617v1_genomic.fna |
| 2672 | <i>Helicobacter cinaedi</i>                | GCA_000284635.1_ASM28463v1_genomic.fna  |
| 2673 | <i>Blautia hansenii</i>                    | GCA_002222595.2_ASM222259v2_genomic.fna |
| 2674 | <i>Lactobacillus paracasei</i>             | GCA_000829035.1_ASM82903v1_genomic.fna  |
| 2675 | <i>Capnocytophaga sputigena</i>            | GCA_002302495.1_ASM230249v1_genomic.fna |
| 2676 | <i>Weissella paramesenteroides</i>         | GCA_002386265.1_ASM238626v1_genomic.fna |
| 2677 | <i>Bifidobacterium angulatum</i>           | GCA_000966445.2_ASM96644v2_genomic.fna  |
| 2678 | <i>Providencia alcalifaciens</i>           | GCA_002393505.1_ASM239350v1_genomic.fna |
| 2679 | <i>Capnocytophaga gingivalis</i>           | GCA_002302415.1_ASM230241v1_genomic.fna |
| 2680 | <i>Prevotella melaninogenica</i>           | GCA_002208725.1_ASM220872v1_genomic.fna |
| 2681 | <i>Gardnerella vaginalis</i>               | GCA_000159155.2_ASM15915v2_genomic.fna  |
| 2682 | <i>Acidithiobacillus caldus</i>            | GCA_000221025.1_ASM22102v1_genomic.fna  |
| 2683 | <i>Staphylococcus carnosus</i>             | GCA_001701005.1_ASM170100v1_genomic.fna |

|      |                                                    |                                         |
|------|----------------------------------------------------|-----------------------------------------|
| 2684 | <i>Aggregatibacter aphrophilus</i>                 | GCA_001188835.1_ASM118883v1_genomic.fna |
| 2685 | <i>Mycoplasma hyorhinis</i>                        | GCA_000145705.1_ASM14570v1_genomic.fna  |
| 2686 | <i>Hydrogenobacter thermophilus</i>                | GCA_000164905.1_ASM16490v1_genomic.fna  |
| 2687 | <i>Thiomonas intermedia</i>                        | GCA_000092605.1_ASM9260v1_genomic.fna   |
| 2688 | <i>Streptomyces hygroscopicus</i>                  | GCA_000340845.1_ASM34084v1_genomic.fna  |
| 2689 | <i>Streptococcus intermedius</i>                   | GCA_000306805.1_ASM30680v1_genomic.fna  |
| 2690 | <i>Hyphomicrobium denitrificans</i>                | GCA_000230975.3_ASM23097v3_genomic.fna  |
| 2691 | <i>Thermoanaerobacterium thermosaccharolyticum</i> | GCA_000328545.1_ASM32854v1_genomic.fna  |
| 2692 | <i>Aggregatibacter actinomycetemcomitans</i>       | GCA_000146265.4_ASM14626v4_genomic.fna  |
| 2693 | <i>Rothia mucilaginosa</i>                         | GCA_001548235.1_ASM154823v1_genomic.fna |
| 2694 | <i>Dickeya zeae</i>                                | GCA_000816045.1_ASM81604v1_genomic.fna  |
| 2695 | <i>Brachyspira hyodysenteriae</i>                  | GCA_000022105.1_ASM2210v1_genomic.fna   |
| 2696 | <i>Pectobacterium carotovorum</i>                  | GCA_000294535.1_ASM29453v1_genomic.fna  |
| 2697 | <i>Mycobacterium kansasii</i>                      | GCA_000831305.1_ASM83130v1_genomic.fna  |
| 2698 | <i>Laribacter hongkongensis</i>                    | GCA_002215055.1_ASM221505v1_genomic.fna |
| 2699 | <i>Rhodococcus opacus</i>                          | GCA_000599545.1_ASM59954v1_genomic.fna  |
| 2700 | <i>Alicyclobacillus acidocaldarius</i>             | GCA_000219875.1_ASM21987v1_genomic.fna  |
| 2701 | <i>Yersinia ruckeri</i>                            | GCA_000834255.1_ASM83425v1_genomic.fna  |
| 2702 | <i>Borrelia hermsii</i>                            | GCA_000956315.1_ASM95631v1_genomic.fna  |
| 2703 | <i>Strawberry lethal</i>                           | GCA_000397185.1_ASM39718v1_genomic.fna  |
| 2704 | <i>Corynebacterium urealyticum</i>                 | GCA_000338095.1_ASM33809v1_genomic.fna  |
| 2705 | <i>Butyrivibrio proteoclasticus</i>                | GCA_000145035.1_ASM14503v1_genomic.fna  |
| 2706 | <i>Lactobacillus buchneri</i>                      | GCA_000211375.1_ASM21137v1_genomic.fna  |
| 2707 | <i>Oligotropha carboxidovorans</i>                 | GCA_000021365.1_ASM2136v1_genomic.fna   |
| 2708 | <i>Escherichia albertii</i>                        | GCA_001549955.1_ASM154995v1_genomic.fna |
| 2709 | <i>Anoxybacillus flavithermus</i>                  | GCA_002197485.1_ASM219748v1_genomic.fna |
| 2710 | <i>Edwardsiella tarda</i>                          | GCA_000146305.1_ASM14630v1_genomic.fna  |
| 2711 | <i>Sorangium cellulosum</i>                        | GCA_000418325.1_ASM41832v1_genomic.fna  |
| 2712 | <i>Mycobacterium intracellulare</i>                | GCA_000277145.1_ASM27714v1_genomic.fna  |
| 2713 | <i>Myxococcus fulvus</i>                           | GCA_000988565.1_ASM98856v1_genomic.fna  |
| 2714 | <i>Kocuria rhizophila</i>                          | GCA_002208685.1_ASM220868v1_genomic.fna |
| 2715 | <i>Arcobacter butzleri</i>                         | GCA_000215345.3_ASM21534v3_genomic.fna  |
| 2716 | <i>Paenibacillus larvae</i>                        | GCA_000511405.1_ASM51140v1_genomic.fna  |
| 2717 | <i>Mycoplasma haemofelis</i>                       | GCA_000200735.1_ASM20073v1_genomic.fna  |



|      |                                         |                                         |
|------|-----------------------------------------|-----------------------------------------|
| 2718 | <i>Lactobacillus sakei</i>              | GCA_000026065.1_ASM2606v1_genomic.fna   |
| 2719 | <i>Idiomarina loihiensis</i>            | GCA_000401175.1_ASM40117v1_genomic.fna  |
| 2720 | <i>Mycoplasma synoviae</i>              | GCA_000008245.1_ASM824v1_genomic.fna    |
| 2721 | <i>Rickettsia typhi</i>                 | GCA_000277285.1_ASM27728v1_genomic.fna  |
| 2722 | <i>Bdellovibrio bacteriovorus</i>       | GCA_000196175.1_ASM19617v1_genomic.fna  |
| 2723 | <i>Lactobacillus johnsonii</i>          | GCA_000091405.1_ASM9140v1_genomic.fna   |
| 2724 | <i>Rhodococcus erythropolis</i>         | GCA_000010105.1_ASM1010v1_genomic.fna   |
| 2725 | <i>Macrococcus caseolyticus</i>         | GCA_002119825.1_ASM211982v1_genomic.fna |
| 2726 | <i>Akkermansia muciniphila</i>          | GCA_001688765.2_ASM168876v2_genomic.fna |
| 2727 | <i>Clostridium butyricum</i>            | GCA_001465175.1_ASM146517v1_genomic.fna |
| 2728 | <i>Flavobacterium psychrophilum</i>     | GCA_000739395.1_ASM73939v1_genomic.fna  |
| 2729 | <i>Lysinibacillus sphaericus</i>        | GCA_001581875.1_ASM158187v1_genomic.fna |
| 2730 | <i>Methylobacterium populi</i>          | GCA_002355515.1_ASM235551v1_genomic.fna |
| 2731 | <i>Burkholderia ubonensis</i>           | GCA_001718355.1_ASM171835v1_genomic.fna |
| 2732 | <i>Geobacillus thermodenitrificans</i>  | GCA_002072065.1_ASM207206v1_genomic.fna |
| 2733 | <i>Pseudomonas mendocina</i>            | GCA_000204295.1_ASM20429v1_genomic.fna  |
| 2734 | <i>Thermosiphon melanesiensis</i>       | GCA_001941385.1_ASM194138v1_genomic.fna |
| 2735 | <i>Campylobacter concisus</i>           | GCA_000017725.2_ASM1772v2_genomic.fna   |
| 2736 | <i>Streptococcus iniae</i>              | GCA_001885145.1_ASM188514v1_genomic.fna |
| 2737 | <i>Granulibacter bethesdensis</i>       | GCA_000576085.2_ASM57608v2_genomic.fna  |
| 2738 | <i>Pseudomonas stutzeri</i>             | GCA_000219605.1_ASM21960v1_genomic.fna  |
| 2739 | <i>Propionibacterium freudenreichii</i> | GCA_000091725.1_ASM9172v1_genomic.fna   |
| 2740 | <i>Salinibacter ruber</i>               | GCA_000090405.1_ASM9040v2_genomic.fna   |
| 2741 | <i>Aeromonas hydrophila</i>             | GCA_000401555.1_ASM40155v1_genomic.fna  |
| 2742 | <i>Ramlibacter tataouinensis</i>        | GCA_001580455.1_ASM158045v1_genomic.fna |
| 2743 | <i>Legionella longbeachae</i>           | GCA_002073455.1_ASM207345v1_genomic.fna |
| 2744 | <i>Collimonas fungivorans</i>           | GCA_001584145.1_ASM158414v1_genomic.fna |
| 2745 | <i>Flavobacterium johnsoniae</i>        | GCA_001705175.1_ASM170517v1_genomic.fna |
| 2746 | <i>Paenibacillus polymyxa</i>           | GCA_000146875.2_ASM14687v2_genomic.fna  |
| 2747 | <i>Herbaspirillum seropedicae</i>       | GCA_000143225.1_ASM14322v1_genomic.fna  |
| 2748 | <i>Mycobacterium abscessus</i>          | GCA_000277775.2_ASM27777v2_genomic.fna  |
| 2749 | <i>Bacillus coagulans</i>               | GCA_000169195.2_ASM16919v2_genomic.fna  |
| 2750 | <i>Psychrobacter cryohalolentis</i>     | GCA_002208765.1_ASM220876v1_genomic.fna |
| 2751 | <i>Erythrobacter litoralis</i>          | GCA_001719165.1_ASM171916v1_genomic.fna |

|      |                                           |                                         |
|------|-------------------------------------------|-----------------------------------------|
| 2752 | <i>Bifidobacterium breve</i>              | GCA_000213865.1_ASM21386v1_genomic.fna  |
| 2753 | <i>Neisseria lactamica</i>                | GCA_002022745.1_ASM202274v1_genomic.fna |
| 2754 | <i>Edwardsiella ictaluri</i>              | GCA_002076875.1_ASM207687v1_genomic.fna |
| 2755 | <i>Pseudoalteromonas tunicata</i>         | GCA_002310815.1_ASM231081v1_genomic.fna |
| 2756 | <i>Pseudoalteromonas atlantica</i>        | GCA_002374815.1_ASM237481v1_genomic.fna |
| 2757 | <i>Listeria welshimeri</i>                | GCA_900187315.1_52087_C01_genomic.fna   |
| 2758 | <i>Listeria ivanovii</i>                  | GCA_000565155.1_ASM56515v1_genomic.fna  |
| 2759 | <i>Mycoplasma fermentans</i>              | GCA_000148625.1_ASM14862v1_genomic.fna  |
| 2760 | <i>Moraxella catarrhalis</i>              | GCA_000740455.1_ASM74045v1_genomic.fna  |
| 2761 | <i>Xenorhabdus bovienii</i>               | GCA_000973125.1_ASM97312v1_genomic.fna  |
| 2762 | <i>Enterobacter cloacae</i>               | GCA_000235765.3_ASM23576v3_genomic.fna  |
| 2763 | <i>Wolbachia endosymbiont</i>             | GCA_000376605.1_ASM37660v1_genomic.fna  |
| 2764 | <i>Gluconobacter oxydans</i>              | GCA_000311765.1_ASM31176v1_genomic.fna  |
| 2765 | <i>Bacillus clausii</i>                   | GCA_000737305.2_ASM73730v2_genomic.fna  |
| 2766 | <i>Lactobacillus salivarius</i>           | GCA_000143435.1_ASM14343v1_genomic.fna  |
| 2767 | <i>Marinobacter hydrocarbonoclasticus</i> | GCA_000015365.1_ASM1536v1_genomic.fna   |
| 2768 | <i>Nocardia farcinica</i>                 | GCA_000009805.1_ASM980v1_genomic.fna    |
| 2769 | <i>Rickettsia canadensis</i>              | GCA_000283915.1_ASM28391v1_genomic.fna  |
| 2770 | <i>Cronobacter sakazakii</i>              | GCA_000017665.1_ASM1766v1_genomic.fna   |
| 2771 | <i>Clostridium beijerinckii</i>           | GCA_000016965.1_ASM1696v1_genomic.fna   |
| 2772 | <i>Citrobacter koseri</i>                 | GCA_002393245.1_ASM239324v1_genomic.fna |
| 2773 | <i>Klebsiella oxytoca</i>                 | GCA_000714655.1_ASM71465v1_genomic.fna  |
| 2774 | <i>Proteus mirabilis</i>                  | GCA_000444425.1_ASM44442v1_genomic.fna  |
| 2775 | <i>Erwinia amylovora</i>                  | GCA_000027205.1_ASM2720v1_genomic.fna   |
| 2776 | <i>Halobacteriovorax marinus</i>          | GCA_002442875.1_ASM244287v1_genomic.fna |
| 2777 | <i>Mycoplasma bovis</i>                   | GCA_000219375.1_ASM21937v1_genomic.fna  |
| 2778 | <i>Campylobacter lari</i>                 | GCA_000816225.1_ASM81622v1_genomic.fna  |
| 2779 | <i>Campylobacter coli</i>                 | GCA_000465235.1_ASM46523v1_genomic.fna  |
| 2780 | <i>Staphylococcus haemolyticus</i>        | GCA_001611955.1_ASM161195v1_genomic.fna |
| 2781 | <i>Propionibacterium acnes</i>            | GCA_000025765.1_ASM2576v1_genomic.fna   |
| 2782 | <i>Burkholderia vietnamiensis</i>         | GCA_001718495.1_ASM171849v1_genomic.fna |
| 2783 | <i>Mesoplasma florum</i>                  | GCA_000479355.1_ASM47935v1_genomic.fna  |
| 2784 | <i>Moorella thermoacetica</i>             | GCA_001267405.1_ASM126740v1_genomic.fna |
| 2785 | <i>Chromobacterium violaceum</i>          | GCA_002735945.1_ASM273594v1_genomic.fna |

|      |                                       |                                                  |
|------|---------------------------------------|--------------------------------------------------|
| 2786 | <i>Mycoplasma gallisepticum</i>       | GCA_000025365.1_ASM2536v1_genomic.fna            |
| 2787 | <i>Serratia marcescens</i>            | GCA_000330865.1_ASM33086v1_genomic.fna           |
| 2788 | <i>Brevibacterium linens</i>          | GCA_001729525.1_ASM172952v1_genomic.fna          |
| 2789 | <i>Pediococcus pentosaceus</i>        | GCA_000496265.1_ASM49626v1_genomic.fna           |
| 2790 | <i>Lactobacillus brevis</i>           | GCA_000359625.1_ASM35962v1_genomic.fna           |
| 2791 | <i>Mannheimia haemolytica</i>         | GCA_000349765.2_ASM34976v2_genomic.fna           |
| 2792 | <i>Bartonella henselae</i>            | GCA_000612765.1_PRJEB5998_assembly_1_genomic.fna |
| 2793 | <i>Lawsonia intracellularis</i>       | GCA_000331715.1_ASM33171v1_genomic.fna           |
| 2794 | <i>Lactobacillus acidophilus</i>      | GCA_000389675.2_ASM38967v2_genomic.fna           |
| 2795 | <i>Clostridium tetani</i>             | GCA_000967115.1_CT1_genomic.fna                  |
| 2796 | <i>Bacteroides thetaiotaomicron</i>   | GCA_001314975.1_ASM131497v1_genomic.fna          |
| 2797 | <i>Chlamydia abortus</i>              | GCA_000952935.1_CAAB7_genomic.fna                |
| 2798 | <i>Pectobacterium atrosepticum</i>    | GCA_000696465.1_ASM69646v1_genomic.fna           |
| 2799 | <i>Salmonella bongori</i>             | GCA_000439255.1_ASM43925v1_genomic.fna           |
| 2800 | <i>Anaplasma phagocytophilum</i>      | GCA_000439755.1_ASM43975v1_genomic.fna           |
| 2801 | <i>Lactobacillus plantarum</i>        | GCA_000023085.1_ASM2308v1_genomic.fna            |
| 2802 | <i>Leuconostoc mesenteroides</i>      | GCA_000234825.3_ASM23482v3_genomic.fna           |
| 2803 | <i>Wigglesworthia glossinidia</i>     | GCA_000247565.1_ASM24756v1_genomic.fna           |
| 2804 | <i>Paraburkholderia xenovorans</i>    | GCA_000756045.1_ASM75604v1_genomic.fna           |
| 2805 | <i>Chlamydia muridarum</i>            | GCA_000709455.1_ASM70945v1_genomic.fna           |
| 2806 | <i>Dehalococcoides mccartyi</i>       | GCA_000830885.1_ASM83088v1_genomic.fna           |
| 2807 | <i>Geobacter sulfurreducens</i>       | GCA_000210155.1_ASM21015v1_genomic.fna           |
| 2808 | <i>Yersinia enterocolitica</i>        | GCA_000192105.1_ASM19210v1_genomic.fna           |
| 2809 | <i>Thermotoga maritima</i>            | GCA_000230655.3_ASM23065v3_genomic.fna           |
| 2810 | <i>Mycoplasma pneumoniae</i>          | GCA_000143945.1_ASM14394v1_genomic.fna           |
| 2811 | <i>Mycobacterium smegmatis</i>        | GCA_000283295.1_ASM28329v1_genomic.fna           |
| 2812 | <i>Corynebacterium diphtheriae</i>    | GCA_000195815.1_ASM19581v1_genomic.fna           |
| 2813 | <i>Lactobacillus gasseri</i>          | GCA_002158885.1_ASM215888v1_genomic.fna          |
| 2814 | <i>Streptococcus gordonii</i>         | GCA_000970665.2_ASM97066v2_genomic.fna           |
| 2815 | <i>Clostridium acetobutylicum</i>     | GCA_000191905.1_ASM19190v1_genomic.fna           |
| 2816 | <i>Deinococcus radiodurans</i>        | GCA_001638825.1_ASM163882v1_genomic.fna          |
| 2817 | <i>Rhodospirillum rubrum</i>          | GCA_000225955.1_ASM22595v1_genomic.fna           |
| 2818 | <i>Acidithiobacillus ferrooxidans</i> | GCA_000020825.1_ASM2082v1_genomic.fna            |
| 2819 | <i>Haemophilus ducreyi</i>            | GCA_001647655.1_ASM164765v1_genomic.fna          |

|      |                                     |                                           |
|------|-------------------------------------|-------------------------------------------|
| 2820 | <i>Bordetella pertussis</i>         | GCA_000193595.3_ASM19359v3_genomic.fna    |
| 2821 | <i>Bordetella parapertussis</i>     | GCA_000195695.1_ASM19569v1_genomic.fna    |
| 2822 | <i>Azotobacter vinelandii</i>       | GCA_000021045.1_ASM2104v1_genomic.fna     |
| 2823 | <i>Mesorhizobium loti</i>           | GCA_001676765.1_ASM167676v1_genomic.fna   |
| 2824 | <i>Bordetella bronchiseptica</i>    | GCA_000195675.1_ASM19567v1_genomic.fna    |
| 2825 | <i>Sinorhizobium meliloti</i>       | GCA_000147775.3_ASM14777v3_genomic.fna    |
| 2826 | <i>Clostridium bolteae</i>          | GCA_002234575.2_ASM223457v2_genomic.fna   |
| 2827 | <i>Collinsella aerofaciens</i>      | GCA_002736145.1_ASM273614v1_genomic.fna   |
| 2828 | <i>Bacteroides ovatus</i>           | GCA_900095495.1_B_ovatus_V975_genomic.fna |
| 2829 | <i>Eubacterium hallii</i>           | GCA_900209925.1_EH1_genomic.fna           |
| 2830 | <i>Providencia stuartii</i>         | GCA_000754345.1_ASM75434v1_genomic.fna    |
| 2831 | <i>Clostridium sporogenes</i>       | GCA_001020205.1_ASM102020v1_genomic.fna   |
| 2832 | <i>Streptococcus infantarius</i>    | GCA_001477615.1_ASM147761v1_genomic.fna   |
| 2833 | <i>Burkholderia glumae</i>          | GCA_000835205.1_ASM83520v1_genomic.fna    |
| 2834 | <i>Bacillus megaterium</i>          | GCA_000832985.1_ASM83298v1_genomic.fna    |
| 2835 | <i>Brucella melitensis</i>          | GCA_000022625.1_ASM2262v1_genomic.fna     |
| 2836 | <i>Caulobacter crescentus</i>       | GCA_000022005.1_ASM2200v1_genomic.fna     |
| 2837 | <i>Enterococcus gallinarum</i>      | GCA_002393265.1_ASM239326v1_genomic.fna   |
| 2838 | <i>Brucella pinnipedialis</i>       | GCA_000740275.1_ASM74027v1_genomic.fna    |
| 2839 | <i>Fibrobacter succinogenes</i>     | GCA_000024665.1_ASM2466v1_genomic.fna     |
| 2840 | <i>Francisella philomiragia</i>     | GCA_000833195.1_ASM83319v1_genomic.fna    |
| 2841 | <i>Pasteurella multocida</i>        | GCA_000006825.1_ASM682v1_genomic.fna      |
| 2842 | <i>Lactobacillus rhamnosus</i>      | GCA_000011045.1_ASM1104v1_genomic.fna     |
| 2843 | <i>Francisella tularensis</i>       | GCA_001880205.1_ASM188020v1_genomic.fna   |
| 2844 | <i>Acetobacter pasteurianus</i>     | GCA_000010825.1_ASM1082v1_genomic.fna     |
| 2845 | <i>Mycobacterium leprae</i>         | GCA_000026685.1_ASM2668v1_genomic.fna     |
| 2846 | <i>Haemophilus parasuis</i>         | GCA_000740985.1_ASM74098v1_genomic.fna    |
| 2847 | <i>Streptococcus equi</i>           | GCA_000020765.1_ASM2076v1_genomic.fna     |
| 2848 | <i>Zymomonas mobilis</i>            | GCA_000175255.2_ASM17525v2_genomic.fna    |
| 2849 | <i>Bifidobacterium bifidum</i>      | GCA_000164965.1_ASM16496v1_genomic.fna    |
| 2850 | <i>Stenotrophomonas maltophilia</i> | GCA_000020665.1_ASM2066v1_genomic.fna     |
| 2851 | <i>Alteromonas macleodii</i>        | GCA_000299955.1_ASM29995v1_genomic.fna    |
| 2852 | <i>Yersinia frederiksenii</i>       | GCA_002591095.1_ASM259109v1_genomic.fna   |
| 2853 | <i>Bacillus mycoides</i>            | GCA_000018825.1_ASM1882v1_genomic.fna     |

|      |                                         |                                                  |
|------|-----------------------------------------|--------------------------------------------------|
| 2854 | <i>Neisseria gonorrhoeae</i>            | GCA_000020105.1_ASM2010v1_genomic.fna            |
| 2855 | <i>Enterococcus faecium</i>             | GCA_000250945.1_ASM25094v1_genomic.fna           |
| 2856 | <i>Comamonas testosteroni</i>           | GCA_000093145.2_ASM9314v2_genomic.fna            |
| 2857 | <i>Streptococcus mutans</i>             | GCA_000091645.1_ASM9164v1_genomic.fna            |
| 2858 | <i>Bifidobacterium animalis</i>         | GCA_000021425.1_ASM2142v1_genomic.fna            |
| 2859 | <i>Bacillus amyloliquefaciens</i>       | GCA_000195515.1_ASM19551v1_genomic.fna           |
| 2860 | <i>Chlamydia psittaci</i>               | GCA_000191925.1_ASM19192v1_genomic.fna           |
| 2861 | <i>Borrelia garinii</i>                 | GCA_000239475.1_ASM23947v1_genomic.fna           |
| 2862 | <i>Bartonella tribocorum</i>            | GCA_000689355.1_PRJEB5999_assembly_1_genomic.fna |
| 2863 | <i>Ruminiclostridium thermocellum</i>   | GCA_000184925.1_ASM18492v1_genomic.fna           |
| 2864 | <i>Rhizobium etli</i>                   | GCA_000020265.1_ASM2026v1_genomic.fna            |
| 2865 | <i>Streptococcus dysgalactiae</i>       | GCA_000010705.1_ASM1070v1_genomic.fna            |
| 2866 | <i>Gluconacetobacter diazotrophicus</i> | GCA_000067045.1_ASM6704v1_genomic.fna            |
| 2867 | <i>Microcystis aeruginosa</i>           | GCA_000981785.1_ASM98178v1_genomic.fna           |
| 2868 | <i>Bradyrhizobium japonicum</i>         | GCA_000807315.1_ASM80731v1_genomic.fna           |
| 2869 | <i>Bifidobacterium dentium</i>          | GCA_000024445.1_ASM2444v1_genomic.fna            |
| 2870 | <i>Brucella suis</i>                    | GCA_000018905.1_ASM1890v1_genomic.fna            |
| 2871 | <i>Burkholderia ambifaria</i>           | GCA_000203915.1_ASM20391v1_genomic.fna           |
| 2872 | <i>Mycobacterium marinum</i>            | GCA_000018345.1_ASM1834v1_genomic.fna            |
| 2873 | <i>Leptospira biflexa</i>               | GCA_000017605.1_ASM1760v1_genomic.fna            |
| 2874 | <i>Brucella canis</i>                   | GCA_000238195.1_ASM23819v1_genomic.fna           |
| 2875 | <i>Anaeromyxobacter dehalogenans</i>    | GCA_000013385.1_ASM1338v1_genomic.fna            |
| 2876 | <i>Clavibacter michiganensis</i>        | GCA_000063485.1_ASM6348v1_genomic.fna            |
| 2877 | <i>Borrelia burgdorferi</i>             | GCA_000021405.1_ASM2140v1_genomic.fna            |
| 2878 | <i>Rhizobium leguminosarum</i>          | GCA_000517605.1_ASM51760v1_genomic.fna           |
| 2879 | <i>Klebsiella pneumoniae</i>            | GCA_000009885.1_ASM988v1_genomic.fna             |
| 2880 | <i>Rickettsia prowazekii</i>            | GCA_000022785.1_ASM2278v1_genomic.fna            |
| 2881 | <i>Ochrobactrum anthropi</i>            | GCA_000742955.1_ASM74295v1_genomic.fna           |
| 2882 | <i>Burkholderia multivorans</i>         | GCA_000018505.1_ASM1850v1_genomic.fna            |
| 2883 | <i>Clostridium botulinum</i>            | GCA_000020165.1_ASM2016v1_genomic.fna            |
| 2884 | <i>Burkholderia oklahomensis</i>        | GCA_000959365.1_ASM95936v1_genomic.fna           |
| 2885 | <i>Phaeobacter gallaeciensis</i>        | GCA_001678945.1_ASM167894v1_genomic.fna          |
| 2886 | <i>Mycoplasma mycoides</i>              | GCA_000023165.1_ASM2316v1_genomic.fna            |
| 2887 | <i>Burkholderia thailandensis</i>       | GCA_000385525.1_ASM38552v1_genomic.fna           |

|      |                                       |                                         |
|------|---------------------------------------|-----------------------------------------|
| 2888 | <i>Ureaplasma parvum</i>              | GCA_000006625.1_ASM662v1_genomic.fna    |
| 2889 | <i>Porphyromonas gingivalis</i>       | GCA_000007585.1_ASM758v1_genomic.fna    |
| 2890 | <i>Clostridium kluyveri</i>           | GCA_000010265.1_ASM1026v1_genomic.fna   |
| 2891 | <i>Orientia tsutsugamushi</i>         | GCA_000010205.1_ASM1020v1_genomic.fna   |
| 2892 | <i>Lactobacillus fermentum</i>        | GCA_000210515.1_ASM21051v1_genomic.fna  |
| 2893 | <i>Methylobacterium extorquens</i>    | GCA_000021845.1_ASM2184v1_genomic.fna   |
| 2894 | <i>Lactococcus garvieae</i>           | GCA_000269945.1_ASM26994v1_genomic.fna  |
| 2895 | <i>Vibrio parahaemolyticus</i>        | GCA_000328405.1_ASM32840v1_genomic.fna  |
| 2896 | <i>Vibrio harveyi</i>                 | GCA_001558435.1_ASM155843v1_genomic.fna |
| 2897 | <i>Borrelia afzelii</i>               | GCA_000222835.1_ASM22283v1_genomic.fna  |
| 2898 | <i>Photobacterium damsela</i>         | GCA_002356235.1_ASM235623v1_genomic.fna |
| 2899 | <i>Faecalibacterium prausnitzii</i>   | GCA_002586945.1_ASM258694v1_genomic.fna |
| 2900 | <i>Bifidobacterium adolescentis</i>   | GCA_000737885.1_ASM73788v1_genomic.fna  |
| 2901 | <i>Rickettsia rickettsii</i>          | GCA_000018225.1_ASM1822v1_genomic.fna   |
| 2902 | <i>Geobacillus stearothermophilus</i> | GCA_002300135.1_ASM230013v1_genomic.fna |
| 2903 | <i>Lactobacillus helveticus</i>       | GCA_000015385.1_ASM1538v1_genomic.fna   |
| 2904 | <i>Ralstonia pickettii</i>            | GCA_000023425.1_ASM2342v1_genomic.fna   |
| 2905 | <i>Rickettsia bellii</i>              | GCA_000018245.1_ASM1824v1_genomic.fna   |
| 2906 | <i>Desulfovibrio vulgaris</i>         | GCA_000195755.1_ASM19575v1_genomic.fna  |
| 2907 | <i>Bacillus subtilis</i>              | GCA_000146565.1_ASM14656v1_genomic.fna  |
| 2908 | <i>Lactobacillus casei</i>            | GCA_000026485.1_ASM2648v1_genomic.fna   |
| 2909 | <i>Coxiella burnetii</i>              | GCA_000017105.1_ASM1710v1_genomic.fna   |
| 2910 | <i>Desulfotobacterium hafniense</i>   | GCA_000010045.1_ASM1004v1_genomic.fna   |
| 2911 | <i>Aeromonas salmonicida</i>          | GCA_002214245.1_ASM221424v1_genomic.fna |
| 2912 | <i>Clostridioides difficile</i>       | GCA_000085225.1_ASM8522v1_genomic.fna   |
| 2913 | <i>Xanthomonas oryzae</i>             | GCA_000010025.1_ASM1002v1_genomic.fna   |
| 2914 | <i>Streptococcus mitis</i>            | GCA_001281025.1_ASM128102v1_genomic.fna |
| 2915 | <i>Xanthomonas axonopodis</i>         | GCA_000007165.1_ASM716v1_genomic.fna    |
| 2916 | <i>Mycoplasma capricolum</i>          | GCA_000192395.2_ASM19239v2_genomic.fna  |
| 2917 | <i>Brucella abortus</i>               | GCA_000018725.1_ASM1872v1_genomic.fna   |
| 2918 | <i>Leptospira borgpetersenii</i>      | GCA_000013965.1_ASM1396v1_genomic.fna   |
| 2919 | <i>Lactobacillus delbrueckii</i>      | GCA_000014405.1_ASM1440v1_genomic.fna   |
| 2920 | <i>Mycoplasma agalactiae</i>          | GCA_000089865.1_ASM8986v1_genomic.fna   |
| 2921 | <i>Francisella tularensis</i>         | GCA_000009245.1_ASM924v1_genomic.fna    |

|      |                                    |                                         |
|------|------------------------------------|-----------------------------------------|
| 2922 | <i>Yersinia pseudotuberculosis</i> | GCA_000019465.1_ASM1946v1_genomic.fna   |
| 2923 | <i>Rhodopseudomonas palustris</i>  | GCA_000013745.1_ASM1374v1_genomic.fna   |
| 2924 | <i>Streptococcus salivarius</i>    | GCA_000253315.1_ASM25331v1_genomic.fna  |
| 2925 | <i>Vibrio cholerae</i>             | GCA_000016245.1_ASM1624v1_genomic.fna   |
| 2926 | <i>Mycobacterium ulcerans</i>      | GCA_002355775.1_ASM235577v1_genomic.fna |
| 2927 | <i>Shigella boydii</i>             | GCA_000020185.1_ASM2018v1_genomic.fna   |
| 2928 | <i>Ralstonia solanacearum</i>      | GCA_000215325.1_ASM21532v1_genomic.fna  |
| 2929 | <i>Corynebacterium jeikeium</i>    | GCA_002209185.1_ASM220918v1_genomic.fna |
| 2930 | <i>Bacillus thuringiensis</i>      | GCA_000497525.2_ASM49752v2_genomic.fna  |
| 2931 | <i>Ehrlichia chaffeensis</i>       | GCA_000632815.1_ASM63281v1_genomic.fna  |
| 2932 | <i>Burkholderia mallei</i>         | GCA_000015465.1_ASM1546v1_genomic.fna   |
| 2933 | <i>Burkholderia pseudomallei</i>   | GCA_000012785.1_ASM1278v1_genomic.fna   |
| 2934 | <i>Burkholderia cenocepacia</i>    | GCA_000014085.1_ASM1408v1_genomic.fna   |
| 2935 | <i>Mycoplasma genitalium</i>       | GCA_000292405.1_ASM29240v1_genomic.fna  |
| 2936 | <i>Chlamydia trachomatis</i>       | GCA_000068585.1_ASM6858v1_genomic.fna   |
| 2937 | <i>Corynebacterium glutamicum</i>  | GCA_000010225.1_ASM1022v1_genomic.fna   |
| 2938 | <i>Thermus thermophilus</i>        | GCA_000008125.1_ASM812v1_genomic.fna    |
| 2939 | <i>Bacillus pumilus</i>            | GCA_000017885.4_ASM1788v4_genomic.fna   |
| 2940 | <i>Lactobacillus reuteri</i>       | GCA_000010005.1_ASM1000v1_genomic.fna   |
| 2941 | <i>Ehrlichia ruminantium</i>       | GCA_000050405.1_ASM5040v1_genomic.fna   |
| 2942 | <i>Synechococcus elongatus</i>     | GCA_000012525.1_ASM1252v1_genomic.fna   |
| 2943 | <i>Shewanella putrefaciens</i>     | GCA_000169215.2_ASM16921v2_genomic.fna  |
| 2944 | <i>Shewanella baltica</i>          | GCA_000015845.1_ASM1584v1_genomic.fna   |
| 2945 | <i>Streptococcus thermophilus</i>  | GCA_000011825.1_ASM1182v1_genomic.fna   |
| 2946 | <i>Shigella sonnei</i>             | GCA_000283715.1_ASM28371v1_genomic.fna  |
| 2947 | <i>Legionella pneumophila</i>      | GCA_000048645.1_ASM4864v1_genomic.fna   |
| 2948 | <i>Bacteroides fragilis</i>        | GCA_000025985.1_ASM2598v1_genomic.fna   |
| 2949 | <i>Bacillus licheniformis</i>      | GCA_000008425.1_ASM842v1_genomic.fna    |
| 2950 | <i>Anaplasma marginale</i>         | GCA_000011945.1_ASM1194v1_genomic.fna   |
| 2951 | <i>Acinetobacter baumannii</i>     | GCA_000018445.1_ASM1844v1_genomic.fna   |
| 2952 | <i>Chlorobium phaeobacteroides</i> | GCA_000020545.1_ASM2054v1_genomic.fna   |
| 2953 | <i>Streptococcus suis</i>          | GCA_000018185.1_ASM1818v1_genomic.fna   |
| 2954 | <i>Mycoplasma hyopneumoniae</i>    | GCA_000008225.1_ASM822v1_genomic.fna    |
| 2955 | <i>Vibrio vulnificus</i>           | GCA_000009745.1_ASM974v1_genomic.fna    |

|      |                                        |                                        |
|------|----------------------------------------|----------------------------------------|
| 2956 | <i>Pseudomonas aeruginosa</i>          | GCA_000014625.1_ASM1462v1_genomic.fna  |
| 2957 | <i>Streptococcus agalactiae</i>        | GCA_000012705.1_ASM1270v1_genomic.fna  |
| 2958 | <i>Haemophilus somnus</i>              | GCA_000011785.1_ASM1178v1_genomic.fna  |
| 2959 | <i>Bifidobacterium longum</i>          | GCA_000008945.1_ASM894v1_genomic.fna   |
| 2960 | <i>Shigella flexneri</i>               | GCA_000007405.1_ASM740v1_genomic.fna   |
| 2961 | <i>Bacillus anthracis</i>              | GCA_000008165.1_ASM816v1_genomic.fna   |
| 2962 | <i>Pseudomonas syringae</i>            | GCA_000344335.2_ASM34433v2_genomic.fna |
| 2963 | <i>Fusobacterium nucleatum</i>         | GCA_000158275.2_ASM15827v2_genomic.fna |
| 2964 | <i>Leptospira interrogans</i>          | GCA_000007685.1_ASM768v1_genomic.fna   |
| 2965 | <i>Agrobacterium tumefaciens</i>       | GCA_000971565.1_ASM97156v1_genomic.fna |
| 2966 | <i>Streptococcus pneumoniae</i>        | GCA_000006885.1_ASM688v1_genomic.fna   |
| 2967 | <i>Streptococcus pyogenes</i>          | GCA_000007285.1_ASM728v1_genomic.fna   |
| 2968 | <i>Pseudomonas putida</i>              | GCA_000007565.2_ASM756v2_genomic.fna   |
| 2969 | <i>Xylella fastidiosa</i>              | GCA_000007245.1_ASM724v1_genomic.fna   |
| 2970 | <i>Neisseria meningitidis</i>          | GCA_000009105.1_ASM910v1_genomic.fna   |
| 2971 | <i>Buchnera aphidicola</i>             | GCA_000007725.1_ASM772v1_genomic.fna   |
| 2972 | <i>Chlamydophila pneumoniae</i>        | GCA_000007205.1_ASM720v1_genomic.fna   |
| 2973 | <i>Helicobacter pylori</i>             | GCA_000008785.1_ASM878v1_genomic.fna   |
| 2974 | <i>Escherichia coli</i>                | GCA_000026345.1_ASM2634v1_genomic.fna  |
| 2975 | <i>Haemophilus influenzae</i>          | GCA_000012185.1_ASM1218v1_genomic.fna  |
| 2976 | <i>Prochlorococcus marinus</i>         | GCA_000011465.1_ASM1146v1_genomic.fna  |
| 2977 | <i>Actinobacillus pleuropneumoniae</i> | GCA_000016685.1_ASM1668v1_genomic.fna  |
| 2978 | <i>Tropheryma whippelii</i>            | GCA_000196075.1_ASM19607v1_genomic.fna |
| 2979 | <i>Mycobacterium bovis</i>             | GCA_000009445.1_ASM944v1_genomic.fna   |
| 2980 | <i>Mycobacterium tuberculosis</i>      | GCA_000008585.1_ASM858v1_genomic.fna   |
| 2981 | <i>Clostridium perfringens</i>         | GCA_000009685.1_ASM968v1_genomic.fna   |
| 2982 | <i>Bacillus cereus</i>                 | GCA_000008005.1_ASM800v1_genomic.fna   |
| 2983 | <i>Listeria monocytogenes</i>          | GCA_000008285.1_ASM828v1_genomic.fna   |
| 2984 | <i>Lactococcus lactis</i>              | GCA_000009425.1_ASM942v1_genomic.fna   |
| 2985 | <i>Staphylococcus epidermidis</i>      | GCA_000011925.1_ASM1192v1_genomic.fna  |
| 2986 | <i>Staphylococcus aureus</i>           | GCA_000009005.1_ASM900v1_genomic.fna   |
| 2987 | <i>Yersinia pestis</i>                 | GCA_000006645.1_ASM664v1_genomic.fna   |
| 2988 | <i>Xanthomonas campestris</i>          | GCA_000012105.1_ASM1210v1_genomic.fna  |
| 2989 | <i>Pseudomonas fluorescens</i>         | GCA_000009225.1_ASM922v1_genomic.fna   |



|      |                                        |                                         |
|------|----------------------------------------|-----------------------------------------|
| 2990 | <i>Salmonella enterica</i>             | GCA_000006945.2_ASM694v2_genomic.fna    |
| 2991 | <i>Salmonella enterica</i>             | GCA_000007545.1_ASM754v1_genomic.fna    |
| 2992 | <i>Staphylococcus aureus</i>           | GCA_000009585.1_ASM958v1_genomic.fna    |
| 2993 | <i>Pseudomonas fluorescens</i>         | GCA_000012445.1_ASM1244v1_genomic.fna   |
| 2994 | <i>Xanthomonas campestris</i>          | GCA_000070605.1_ASM7060v1_genomic.fna   |
| 2995 | <i>Campylobacter jejuni</i>            | GCA_000011865.1_ASM1186v1_genomic.fna   |
| 2996 | <i>Yersinia pestis</i>                 | GCA_000007885.1_ASM788v1_genomic.fna    |
| 2997 | <i>Staphylococcus epidermidis</i>      | GCA_000751035.1_PM221_genomic.fna       |
| 2998 | <i>Lactococcus lactis</i>              | GCA_000014545.1_ASM1454v1_genomic.fna   |
| 2999 | <i>Listeria monocytogenes</i>          | GCA_000021185.1_ASM2118v1_genomic.fna   |
| 3000 | <i>Bacillus cereus</i>                 | GCA_000011625.1_ASM1162v1_genomic.fna   |
| 3001 | <i>Clostridium perfringens</i>         | GCA_000013845.2_ASM1384v2_genomic.fna   |
| 3002 | <i>Mycobacterium tuberculosis</i>      | GCA_000016145.1_ASM1614v1_genomic.fna   |
| 3003 | <i>Mycobacterium bovis</i>             | GCA_000010685.1_ASM1068v1_genomic.fna   |
| 3004 | <i>Mycobacterium avium</i>             | GCA_000014985.1_ASM1498v1_genomic.fna   |
| 3005 | <i>Actinobacillus pleuropneumoniae</i> | GCA_000020405.1_ASM2040v1_genomic.fna   |
| 3006 | <i>Prochlorococcus marinus</i>         | GCA_000011485.1_ASM1148v1_genomic.fna   |
| 3007 | <i>Haemophilus influenzae</i>          | GCA_000165525.1_ASM16552v1_genomic.fna  |
| 3008 | <i>Escherichia coli</i>                | GCA_000005845.2_ASM584v2_genomic.fna    |
| 3009 | <i>Chlamydomonas pneumoniae</i>        | GCA_000011165.1_ASM1116v1_genomic.fna   |
| 3010 | <i>Buchnera aphidicola</i>             | GCA_000009605.1_ASM960v1_genomic.fna    |
| 3011 | <i>Helicobacter pylori</i>             | GCA_000011725.1_ASM1172v1_genomic.fna   |
| 3012 | <i>Neisseria meningitidis</i>          | GCA_000009465.1_ASM946v1_genomic.fna    |
| 3013 | <i>Xylella fastidiosa</i>              | GCA_000019325.1_ASM1932v1_genomic.fna   |
| 3014 | <i>Pseudomonas putida</i>              | GCA_000016865.1_ASM1686v1_genomic.fna   |
| 3015 | <i>Streptococcus pyogenes</i>          | GCA_000007425.1_ASM742v1_genomic.fna    |
| 3016 | <i>Streptococcus pneumoniae</i>        | GCA_000014365.1_ASM1436v1_genomic.fna   |
| 3017 | <i>Agrobacterium tumefaciens</i>       | GCA_001551895.1_ASM155189v1_genomic.fna |
| 3018 | <i>Leptospira interrogans</i>          | GCA_000231175.1_ASM23117v1_genomic.fna  |
| 3019 | <i>Fusobacterium nucleatum</i>         | GCA_000162235.2_ASM16223v2_genomic.fna  |
| 3020 | <i>Streptococcus agalactiae</i>        | GCA_000196055.1_ASM19605v1_genomic.fna  |
| 3021 | <i>Bacillus anthracis</i>              | GCA_000008445.1_ASM844v1_genomic.fna    |
| 3022 | <i>Shigella flexneri</i>               | GCA_000013585.1_ASM1358v1_genomic.fna   |
| 3023 | <i>Bifidobacterium longum</i>          | GCA_000020425.1_ASM2042v1_genomic.fna   |

|      |                                    |                                         |
|------|------------------------------------|-----------------------------------------|
| 3024 | <i>Histophilus somni</i>           | GCA_002162175.1_ASM216217v1_genomic.fna |
| 3025 | <i>Pseudomonas syringae</i>        | GCA_000344355.2_ASM34435v2_genomic.fna  |
| 3026 | <i>Pseudomonas aeruginosa</i>      | GCA_000017205.1_ASM1720v1_genomic.fna   |
| 3027 | <i>Vibrio vulnificus</i>           | GCA_000039765.1_ASM3976v1_genomic.fna   |
| 3028 | <i>Mycoplasma hyopneumoniae</i>    | GCA_000008405.1_ASM840v1_genomic.fna    |
| 3029 | <i>Streptococcus suis</i>          | GCA_000026725.1_ASM2672v1_genomic.fna   |
| 3030 | <i>Acinetobacter baumannii</i>     | GCA_000021145.1_ASM2114v1_genomic.fna   |
| 3031 | <i>Bacillus licheniformis</i>      | GCA_001596055.1_ASM159605v1_genomic.fna |
| 3032 | <i>Bacteroides fragilis</i>        | GCA_000210835.1_ASM21083v1_genomic.fna  |
| 3033 | <i>Legionella pneumophila</i>      | GCA_000048665.1_ASM4866v1_genomic.fna   |
| 3034 | <i>Streptococcus thermophilus</i>  | GCA_000011845.1_ASM1184v1_genomic.fna   |
| 3035 | <i>Shewanella baltica</i>          | GCA_000017325.1_ASM1732v1_genomic.fna   |
| 3036 | <i>Ehrlichia ruminantium</i>       | GCA_000050425.1_ASM5042v1_genomic.fna   |
| 3037 | <i>Lactobacillus reuteri</i>       | GCA_000159455.2_ASM15945v2_genomic.fna  |
| 3038 | <i>Bacillus pumilus</i>            | GCA_000590455.1_ASM59045v1_genomic.fna  |
| 3039 | <i>Thermus thermophilus</i>        | GCA_000214845.1_ASM21484v1_genomic.fna  |
| 3040 | <i>Corynebacterium glutamicum</i>  | GCA_000196335.1_ASM19633v1_genomic.fna  |
| 3041 | <i>Mycoplasma genitalium</i>       | GCA_000292445.1_ASM29244v1_genomic.fna  |
| 3042 | <i>Chlamydia trachomatis</i>       | GCA_000012125.1_ASM1212v1_genomic.fna   |
| 3043 | <i>Burkholderia cenocepacia</i>    | GCA_000019505.1_ASM1950v1_genomic.fna   |
| 3044 | <i>Shigella sonnei</i>             | GCA_001518855.1_ASM151885v1_genomic.fna |
| 3045 | <i>Burkholderia pseudomallei</i>   | GCA_000015905.1_ASM1590v1_genomic.fna   |
| 3046 | <i>Burkholderia mallei</i>         | GCA_000015605.1_ASM1560v1_genomic.fna   |
| 3047 | <i>Ehrlichia chaffeensis</i>       | GCA_000632865.1_ASM63286v1_genomic.fna  |
| 3048 | <i>Ralstonia solanacearum</i>      | GCA_000283475.1_ASM28347v1_genomic.fna  |
| 3049 | <i>Bacillus thuringiensis</i>      | GCA_000015065.1_ASM1506v1_genomic.fna   |
| 3050 | <i>Shigella boydii</i>             | GCA_001027225.1_ASM102722v1_genomic.fna |
| 3051 | <i>Vibrio cholerae</i>             | GCA_000021605.1_ASM2160v1_genomic.fna   |
| 3052 | <i>Streptococcus salivarius</i>    | GCA_000253335.1_ASM25333v1_genomic.fna  |
| 3053 | <i>Rhodopseudomonas palustris</i>  | GCA_000014825.1_ASM1482v1_genomic.fna   |
| 3054 | <i>Rhodobacter sphaeroides</i>     | GCA_000015985.1_ASM1598v1_genomic.fna   |
| 3055 | <i>Yersinia pseudotuberculosis</i> | GCA_000020085.1_ASM2008v1_genomic.fna   |
| 3056 | <i>Francisella tularensis</i>      | GCA_000009325.1_ASM932v1_genomic.fna    |
| 3057 | <i>Brucella abortus</i>            | GCA_000054005.1_ASM5400v1_genomic.fna   |

|      |                                     |                                         |
|------|-------------------------------------|-----------------------------------------|
| 3058 | <i>Lactobacillus delbrueckii</i>    | GCA_000182835.1_ASM18283v1_genomic.fna  |
| 3059 | <i>Leptospira borgpetersenii</i>    | GCA_001444465.1_ASM144446v1_genomic.fna |
| 3060 | <i>Mycoplasma capricolum</i>        | GCA_000835085.1_ASM83508v1_genomic.fna  |
| 3061 | <i>Bartonella bacilliformis</i>     | GCA_001559035.1_ASM155903v1_genomic.fna |
| 3062 | <i>Xanthomonas citri</i>            | GCA_000349225.1_ASM34922v1_genomic.fna  |
| 3063 | <i>Campylobacter fetus</i>          | GCA_000015085.1_ASM1508v1_genomic.fna   |
| 3064 | <i>Streptococcus mitis</i>          | GCA_001560895.1_ASM156089v1_genomic.fna |
| 3065 | <i>Xanthomonas oryzae</i>           | GCA_000168315.3_ASM16831v3_genomic.fna  |
| 3066 | <i>Clostridioides difficile</i>     | GCA_000210435.1_ASM21043v1_genomic.fna  |
| 3067 | <i>Aeromonas salmonicida</i>        | GCA_002214265.1_ASM221426v1_genomic.fna |
| 3068 | <i>Coxiella burnetii</i>            | GCA_000018745.1_ASM1874v1_genomic.fna   |
| 3069 | <i>Lactobacillus casei</i>          | GCA_000194765.1_ASM19476v1_genomic.fna  |
| 3070 | <i>Bacillus subtilis</i>            | GCA_000186745.1_ASM18674v1_genomic.fna  |
| 3071 | <i>Desulfovibrio vulgaris</i>       | GCA_000015485.1_ASM1548v1_genomic.fna   |
| 3072 | <i>Rickettsia bellii</i>            | GCA_002078315.1_ASM207831v1_genomic.fna |
| 3073 | <i>Ralstonia pickettii</i>          | GCA_002393485.1_ASM239348v1_genomic.fna |
| 3074 | <i>Lactobacillus helveticus</i>     | GCA_000165775.3_ASM16577v3_genomic.fna  |
| 3075 | <i>Rickettsia rickettsii</i>        | GCA_000283775.1_ASM28377v1_genomic.fna  |
| 3076 | <i>Bifidobacterium adolescentis</i> | GCA_000817995.1_ASM81799v1_genomic.fna  |
| 3077 | <i>Borrelia afzelii</i>             | GCA_000741005.1_ASM74100v1_genomic.fna  |
| 3078 | <i>Vibrio harveyi</i>               | GCA_001908435.2_ASM190843v2_genomic.fna |
| 3079 | <i>Methylobacterium extorquens</i>  | GCA_000022685.1_ASM2268v1_genomic.fna   |
| 3080 | <i>Lactococcus garvieae</i>         | GCA_002355575.1_ASM235557v1_genomic.fna |
| 3081 | <i>Vibrio parahaemolyticus</i>      | GCA_000430405.1_ASM43040v1_genomic.fna  |
| 3082 | <i>Lactobacillus fermentum</i>      | GCA_000397165.1_ASM39716v1_genomic.fna  |
| 3083 | <i>Clostridium kluyveri</i>         | GCA_001902295.1_ASM190229v1_genomic.fna |
| 3084 | <i>Porphyromonas gingivalis</i>     | GCA_000270225.1_ASM27022v1_genomic.fna  |
| 3085 | <i>Burkholderia thailandensis</i>   | GCA_000567905.1_ASM56790v1_genomic.fna  |
| 3086 | <i>Mycoplasma mycoides</i>          | GCA_000023685.1_ASM2368v1_genomic.fna   |
| 3087 | <i>Phaeobacter gallaeciensis</i>    | GCA_002381285.1_ASM238128v1_genomic.fna |
| 3088 | <i>Ureaplasma parvum</i>            | GCA_000828735.1_ASM82873v1_genomic.fna  |
| 3089 | <i>Clostridium botulinum</i>        | GCA_000063585.1_ASM6358v1_genomic.fna   |
| 3090 | <i>Burkholderia multivorans</i>     | GCA_000756005.1_ASM75600v1_genomic.fna  |
| 3091 | <i>Rickettsia prowazekii</i>        | GCA_000277165.1_ASM27716v1_genomic.fna  |

|      |                                       |                                                        |
|------|---------------------------------------|--------------------------------------------------------|
| 3092 | <i>Klebsiella pneumoniae</i>          | GCA_000016305.1_ASM1630v1_genomic.fna                  |
| 3093 | <i>Borrelia burgdorferi</i>           | GCA_000166635.2_ASM16663v1_genomic.fna                 |
| 3094 | <i>Brucella canis</i>                 | GCA_000691585.1_ASM69158v1_genomic.fna                 |
| 3095 | <i>Clavibacter michiganensis</i>      | GCA_000355695.1_ASM35569v1_genomic.fna                 |
| 3096 | <i>Brucella suis</i>                  | GCA_000223195.1_ASM22319v1_genomic.fna                 |
| 3097 | <i>Burkholderia ambifaria</i>         | GCA_000959545.1_ASM95954v1_genomic.fna                 |
| 3098 | <i>Enterococcus faecalis</i>          | GCA_000172575.2_ASM17257v2_genomic.fna                 |
| 3099 | <i>Bradyrhizobium japonicum</i>       | GCA_001887695.1_ASM188769v1_genomic.fna                |
| 3100 | <i>Microcystis aeruginosa</i>         | GCA_001704955.1_ASM170495v1_genomic.fna                |
| 3101 | <i>Streptococcus dysgalactiae</i>     | GCA_000188715.1_ASM18871v1_genomic.fna                 |
| 3102 | <i>Rhizobium etli</i>                 | GCA_000442435.1_ASM44243v1_genomic.fna                 |
| 3103 | <i>Ruminiclostridium thermocellum</i> | GCA_000255615.3_ASM25561v3_genomic.fna                 |
| 3104 | <i>Borrelia garinii</i>               | GCA_000300045.1_ASM30004v1_genomic.fna                 |
| 3105 | <i>Chlamydia psittaci</i>             | GCA_000270385.1_ASM27038v1_genomic.fna                 |
| 3106 | <i>Bifidobacterium animalis</i>       | GCA_000022705.1_ASM2270v1_genomic.fna                  |
| 3107 | <i>Bacillus amyloliquefaciens</i>     | GCA_000204275.1_ASM20427v1_genomic.fna                 |
| 3108 | <i>Streptococcus mutans</i>           | GCA_000271865.1_ASM27186v1_genomic.fna                 |
| 3109 | <i>Neisseria gonorrhoeae</i>          | GCA_000156855.2_ASM15685v2_genomic.fna                 |
| 3110 | <i>Comamonas testosteroni</i>         | GCA_001406795.1_Comamonas_testosteroni_P19_genomic.fna |
| 3111 | <i>Enterococcus faecium</i>           | GCA_000336405.1_ASM33640v1_genomic.fna                 |
| 3112 | <i>Bacillus mycoides</i>              | GCA_000742855.1_ASM74285v1_genomic.fna                 |
| 3113 | <i>Yersinia frederiksenii</i>         | GCA_002591195.1_ASM259119v1_genomic.fna                |
| 3114 | <i>Alteromonas macleodii</i>          | GCA_000299995.1_ASM29999v1_genomic.fna                 |
| 3115 | <i>Stenotrophomonas maltophilia</i>   | GCA_000223885.1_ASM22388v1_genomic.fna                 |
| 3116 | <i>Bifidobacterium bifidum</i>        | GCA_000265095.1_ASM26509v1_genomic.fna                 |
| 3117 | <i>Zymomonas mobilis</i>              | GCA_000007105.1_ASM710v1_genomic.fna                   |
| 3118 | <i>Streptococcus equi</i>             | GCA_000026585.1_ASM2658v1_genomic.fna                  |
| 3119 | <i>Haemophilus parasuis</i>           | GCA_000742795.1_ASM74279v1_genomic.fna                 |
| 3120 | <i>Acetobacter pasteurianus</i>       | GCA_000010845.1_ASM1084v1_genomic.fna                  |
| 3121 | <i>Francisella tularensis</i>         | GCA_001880245.1_ASM188024v1_genomic.fna                |
| 3122 | <i>Pasteurella multocida</i>          | GCA_000234745.1_ASM23474v1_genomic.fna                 |
| 3123 | <i>Francisella philomiragia</i>       | GCA_000833215.1_ASM83321v1_genomic.fna                 |
| 3124 | <i>Lactobacillus rhamnosus</i>        | GCA_000026525.1_ASM2652v1_genomic.fna                  |
| 3125 | <i>Brucella melitensis</i>            | GCA_000192725.1_ASM19272v1_genomic.fna                 |

|      |                                    |                                                  |
|------|------------------------------------|--------------------------------------------------|
| 3126 | <i>Bacillus megaterium</i>         | GCA_000025805.1_ASM2580v1_genomic.fna            |
| 3127 | <i>Burkholderia glumae</i>         | GCA_000960995.1_ASM96099v1_genomic.fna           |
| 3128 | <i>Providencia stuartii</i>        | GCA_001558855.1_ASM155885v1_genomic.fna          |
| 3129 | <i>Sinorhizobium meliloti</i>      | GCA_000147795.3_ASM14779v3_genomic.fna           |
| 3130 | <i>Azotobacter vinelandii</i>      | GCA_000380365.1_ASM38036v1_genomic.fna           |
| 3131 | <i>Bordetella bronchiseptica</i>   | GCA_000317955.1_ASM31795v1_genomic.fna           |
| 3132 | <i>Bordetella pertussis</i>        | GCA_000212975.1_ASM21297v1_genomic.fna           |
| 3133 | <i>Bordetella parapertussis</i>    | GCA_001704255.1_ASM170425v1_genomic.fna          |
| 3134 | <i>Haemophilus ducreyi</i>         | GCA_001647695.1_ASM164769v1_genomic.fna          |
| 3135 | <i>Streptococcus gordonii</i>      | GCA_001281105.1_ASM128110v1_genomic.fna          |
| 3136 | <i>Clostridium acetobutylicum</i>  | GCA_000218855.1_ASM21885v1_genomic.fna           |
| 3137 | <i>Lactobacillus gasseri</i>       | GCA_002287905.1_ASM228790v1_genomic.fna          |
| 3138 | <i>Corynebacterium diphtheriae</i> | GCA_000241875.1_ASM24187v1_genomic.fna           |
| 3139 | <i>Mycobacterium smegmatis</i>     | GCA_000767605.1_ASM76760v1_genomic.fna           |
| 3140 | <i>Mycoplasma pneumoniae</i>       | GCA_000283755.1_ASM28375v1_genomic.fna           |
| 3141 | <i>Thermotoga maritima</i>         | GCA_000390265.1_ASM39026v1_genomic.fna           |
| 3142 | <i>Yersinia enterocolitica</i>     | GCA_000253175.1_ASM25317v1_genomic.fna           |
| 3143 | <i>Dehalococcoides mccartyi</i>    | GCA_000009025.1_ASM902v1_genomic.fna             |
| 3144 | <i>Chlamydia muridarum</i>         | GCA_000767405.1_ASM76740v1_genomic.fna           |
| 3145 | <i>Leuconostoc mesenteroides</i>   | GCA_000512955.1_ASM51295v1_genomic.fna           |
| 3146 | <i>Anaplasma phagocytophilum</i>   | GCA_000439775.1_ASM43977v1_genomic.fna           |
| 3147 | <i>Pectobacterium atrosepticum</i> | GCA_000740965.1_ASM74096v1_genomic.fna           |
| 3148 | <i>Salmonella bongori</i>          | GCA_000709535.1_ASM70953v1_genomic.fna           |
| 3149 | <i>Chlamydia abortus</i>           | GCA_002205755.1_ASM220575v1_genomic.fna          |
| 3150 | <i>Lactobacillus acidophilus</i>   | GCA_000934625.1_ASM93462v1_genomic.fna           |
| 3151 | <i>Bartonella henselae</i>         | GCA_000612965.1_PRJEB4971_assembly_1_genomic.fna |
| 3152 | <i>Mannheimia haemolytica</i>      | GCA_000349785.2_ASM34978v2_genomic.fna           |
| 3153 | <i>Leifsonia xyli</i>              | GCA_001647635.1_ASM164763v1_genomic.fna          |
| 3154 | <i>Lactobacillus plantarum</i>     | GCA_000148815.2_ASM14881v1_genomic.fna           |
| 3155 | <i>Pediococcus pentosaceus</i>     | GCA_001411765.2_ASM141176v2_genomic.fna          |
| 3156 | <i>Lactobacillus brevis</i>        | GCA_001676805.1_ASM167680v1_genomic.fna          |
| 3157 | <i>Serratia marcescens</i>         | GCA_000336425.1_ASM33642v1_genomic.fna           |
| 3158 | <i>Mycoplasma gallisepticum</i>    | GCA_000025385.1_ASM2538v1_genomic.fna            |
| 3159 | <i>Moorella thermoacetica</i>      | GCA_001267435.1_ASM126743v1_genomic.fna          |

|      |                                         |                                         |
|------|-----------------------------------------|-----------------------------------------|
| 3160 | <i>Mesoplasma florum</i>                | GCA_002504365.1_ASM250436v1_genomic.fna |
| 3161 | <i>Burkholderia vietnamiensis</i>       | GCA_001718775.1_ASM171877v1_genomic.fna |
| 3162 | <i>Propionibacterium acnes</i>          | GCA_000213155.1_ASM21315v1_genomic.fna  |
| 3163 | <i>Campylobacter coli</i>               | GCA_000494775.1_ASM49477v1_genomic.fna  |
| 3164 | <i>Campylobacter lari</i>               | GCA_000816365.1_ASM81636v1_genomic.fna  |
| 3165 | <i>Mycoplasma bovis</i>                 | GCA_000270525.1_ASM27052v1_genomic.fna  |
| 3166 | <i>Klebsiella oxytoca</i>               | GCA_001022115.1_ASM102211v1_genomic.fna |
| 3167 | <i>Proteus mirabilis</i>                | GCA_001281545.1_ASM128154v1_genomic.fna |
| 3168 | <i>Clostridium beijerinckii</i>         | GCA_000506785.3_ASM50678v3_genomic.fna  |
| 3169 | <i>Cronobacter sakazakii</i>            | GCA_000263215.1_ASM26321v1_genomic.fna  |
| 3170 | <i>Lactobacillus salivarius</i>         | GCA_000758365.1_ASM75836v1_genomic.fna  |
| 3171 | <i>Gluconobacter oxydans</i>            | GCA_000583855.1_ASM58385v1_genomic.fna  |
| 3172 | <i>Bacillus clausii</i>                 | GCA_002250115.1_ASM225011v1_genomic.fna |
| 3173 | <i>Wolbachia endosymbiont</i>           | GCA_000953315.1_Wau001_genomic.fna      |
| 3174 | <i>Enterobacter cloacae</i>             | GCA_000239975.1_ASM23997v1_genomic.fna  |
| 3175 | <i>Moraxella catarrhalis</i>            | GCA_000766665.1_ASM76666v1_genomic.fna  |
| 3176 | <i>Listeria ivanovii</i>                | GCA_000763475.1_ASM76347v1_genomic.fna  |
| 3177 | <i>Bifidobacterium breve</i>            | GCA_000220135.1_ASM22013v1_genomic.fna  |
| 3178 | <i>Staphylococcus saprophyticus</i>     | GCA_001558275.1_ASM155827v1_genomic.fna |
| 3179 | <i>Bacillus coagulans</i>               | GCA_000217835.1_ASM21783v1_genomic.fna  |
| 3180 | <i>Herbaspirillum seropedicae</i>       | GCA_001721865.1_ASM172186v1_genomic.fna |
| 3181 | <i>Mycobacterium abscessus</i>          | GCA_000445035.1_ASM44503v1_genomic.fna  |
| 3182 | <i>Paenibacillus polymyxa</i>           | GCA_000237325.1_ASM23732v1_genomic.fna  |
| 3183 | <i>Legionella longbeachae</i>           | GCA_002113845.1_ASM211384v1_genomic.fna |
| 3184 | <i>Aeromonas hydrophila</i>             | GCA_000512185.1_ASM51218v1_genomic.fna  |
| 3185 | <i>Propionibacterium freudenreichii</i> | GCA_002117425.1_ASM211742v1_genomic.fna |
| 3186 | <i>Pseudomonas stutzeri</i>             | GCA_000013785.1_ASM1378v1_genomic.fna   |
| 3187 | <i>Streptococcus iniae</i>              | GCA_002220115.1_ASM222011v1_genomic.fna |
| 3188 | <i>Granulibacter bethesdensis</i>       | GCA_000576145.2_ASM57614v2_genomic.fna  |
| 3189 | <i>Pseudomonas mendocina</i>            | GCA_000733715.2_ASM73371v2_genomic.fna  |
| 3190 | <i>Geobacillus thermodenitrificans</i>  | GCA_002119625.1_ASM211962v1_genomic.fna |
| 3191 | <i>Burkholderia ubonensis</i>           | GCA_001718655.1_ASM171865v1_genomic.fna |
| 3192 | <i>Lysinibacillus sphaericus</i>        | GCA_001598075.1_ASM159807v1_genomic.fna |
| 3193 | <i>Flavobacterium psychrophilum</i>     | GCA_000754365.1_ASM75436v1_genomic.fna  |

|      |                                                    |                                         |
|------|----------------------------------------------------|-----------------------------------------|
| 3194 | <i>Clostridium butyricum</i>                       | GCA_001646605.1_ASM164660v1_genomic.fna |
| 3195 | <i>Rhodococcus erythropolis</i>                    | GCA_000696675.2_ASM69667v2_genomic.fna  |
| 3196 | <i>Lactobacillus johnsonii</i>                     | GCA_000204985.1_ASM20498v1_genomic.fna  |
| 3197 | <i>Rickettsia typhi</i>                            | GCA_000277305.1_ASM27730v1_genomic.fna  |
| 3198 | <i>Lactobacillus sakei</i>                         | GCA_002250035.1_ASM225003v1_genomic.fna |
| 3199 | <i>Paenibacillus larvae</i>                        | GCA_002007765.1_ASM200776v1_genomic.fna |
| 3200 | <i>Arcobacter butzleri</i>                         | GCA_000284355.1_ASM28435v1_genomic.fna  |
| 3201 | <i>Mycobacterium intracellulare</i>                | GCA_000767485.1_ASM76748v1_genomic.fna  |
| 3202 | <i>Anoxybacillus flavithermus</i>                  | GCA_002243705.1_ASM224370v1_genomic.fna |
| 3203 | <i>Edwardsiella tarda</i>                          | GCA_001011055.1_ASM101105v1_genomic.fna |
| 3204 | <i>Oligotropha carboxidovorans</i>                 | GCA_000218585.1_ASM21858v1_genomic.fna  |
| 3205 | <i>Escherichia albertii</i>                        | GCA_002285455.1_ASM228545v1_genomic.fna |
| 3206 | <i>Corynebacterium urealyticum</i>                 | GCA_900187235.1_52184_D01_genomic.fna   |
| 3207 | <i>Yersinia ruckeri</i>                            | GCA_002192595.1_ASM219259v1_genomic.fna |
| 3208 | <i>Variovorax paradoxus</i>                        | GCA_000023345.1_ASM2334v1_genomic.fna   |
| 3209 | <i>Rhodococcus opacus</i>                          | GCA_001685605.1_ASM168560v1_genomic.fna |
| 3210 | <i>Pectobacterium carotovorum</i>                  | GCA_001932635.1_ASM193263v1_genomic.fna |
| 3211 | <i>Rothia mucilaginosa</i>                         | GCA_002386365.1_ASM238636v1_genomic.fna |
| 3212 | <i>Streptomyces albus</i>                          | GCA_000827005.1_ASM82700v1_genomic.fna  |
| 3213 | <i>Aggregatibacter actinomycetemcomitans</i>       | GCA_000163615.3_ASM16361v3_genomic.fna  |
| 3214 | <i>Thermoanaerobacterium thermosaccharolyticum</i> | GCA_002250075.1_ASM225007v1_genomic.fna |
| 3215 | <i>Streptococcus intermedius</i>                   | GCA_000463385.1_ASM46338v1_genomic.fna  |
| 3216 | <i>Streptomyces hygroscopicus</i>                  | GCA_001447075.1_ASM144707v1_genomic.fna |
| 3217 | <i>Mycoplasma hyorhinis</i>                        | GCA_000211295.1_ASM21129v1_genomic.fna  |
| 3218 | <i>Aggregatibacter aphrophilus</i>                 | GCA_001262035.1_ASM126203v1_genomic.fna |
| 3219 | <i>Gardnerella vaginalis</i>                       | GCA_000213955.1_ASM21395v1_genomic.fna  |
| 3220 | <i>Capnocytophaga sputigena</i>                    | GCA_002302595.1_ASM230259v1_genomic.fna |
| 3221 | <i>Lactobacillus paracasei</i>                     | GCA_000155515.2_ASM15551v2_genomic.fna  |
| 3222 | <i>Staphylococcus capitis</i>                      | GCA_002591175.1_ASM259117v1_genomic.fna |
| 3223 | <i>Oxalobacter formigenes</i>                      | GCA_002128345.1_ASM212834v1_genomic.fna |
| 3224 | <i>Erysipelothrix rhusiopathiae</i>                | GCA_001602155.1_ASM160215v1_genomic.fna |
| 3225 | <i>Bacillus atrophaeus</i>                         | GCA_000830075.1_ASM83007v1_genomic.fna  |
| 3226 | <i>Klebsiella variicola</i>                        | GCA_000828055.2_ASM82805v2_genomic.fna  |
| 3227 | <i>Streptococcus oralis</i>                        | GCA_002386345.1_ASM238634v1_genomic.fna |

|      |                                            |                                                                |
|------|--------------------------------------------|----------------------------------------------------------------|
| 3228 | <i>Achromobacter xylosoxidans</i>          | GCA_000758265.1_ASM75826v1_genomic.fna                         |
| 3229 | <i>Xanthomonas fuscans</i>                 | GCA_001610815.1_ASM161081v1_genomic.fna                        |
| 3230 | <i>Vibrio alginolyticus</i>                | GCA_001469735.1_ASM146973v1_genomic.fna                        |
| 3231 | <i>Pediococcus acidilactici</i>            | GCA_002173575.1_ASM217357v1_genomic.fna                        |
| 3232 | <i>Vibrio coralliilyticus</i>              | GCA_001693615.1_ASM169361v1_genomic.fna                        |
| 3233 | <i>Parageobacillus thermoglucosidasius</i> | GCA_001700985.1_ASM170098v1_genomic.fna                        |
| 3234 | <i>Corynebacterium pseudotuberculosis</i>  | GCA_000144935.2_ASM14493v2_genomic.fna                         |
| 3235 | <i>Enterobacter asburiae</i>               | GCA_001022095.1_ASM102209v1_genomic.fna                        |
| 3236 | <i>Veillonella parvula</i>                 | GCA_900186885.1_48903_D01_genomic.fna                          |
| 3237 | <i>Mesorhizobium ciceri</i>                | GCA_001618825.1_ASM161882v1_genomic.fna                        |
| 3238 | <i>Xanthomonas euvesicatoria</i>           | GCA_001908795.1_ASM190879v1_genomic.fna                        |
| 3239 | <i>Acinetobacter pittii</i>                | GCA_001617545.1_ASM161754v1_genomic.fna                        |
| 3240 | <i>Riemerella anatipestifer</i>            | GCA_000191565.1_ASM19156v1_genomic.fna                         |
| 3241 | <i>Lactobacillus amylovorus</i>            | GCA_002706375.1_ASM270637v1_genomic.fna                        |
| 3242 | <i>Streptococcus constellatus</i>          | GCA_000463445.1_ASM46344v1_genomic.fna                         |
| 3243 | <i>Staphylococcus lugdunensis</i>          | GCA_001558775.1_ASM155877v1_genomic.fna                        |
| 3244 | <i>Streptococcus anginosus</i>             | GCA_000478925.1_ASM47892v1_genomic.fna                         |
| 3245 | <i>Pantoea ananatis</i>                    | GCA_000270125.2_ASM27012v2_genomic.fna                         |
| 3246 | <i>Amycolatopsis mediterranei</i>          | GCA_000282715.1_ASM28271v1_genomic.fna                         |
| 3247 | <i>Streptococcus gallolyticus</i>          | GCA_000203195.1_ASM20319v1_genomic.fna                         |
| 3248 | <i>Taylorella equigenitalis</i>            | GCA_002288025.1_ASM228802v1_genomic.fna                        |
| 3249 | <i>Ketogulonicigenium vulgare</i>          | GCA_001399515.1_ASM139951v1_genomic.fna                        |
| 3250 | <i>Citrobacter freundii</i>                | GCA_001022275.1_ASM102227v1_genomic.fna                        |
| 3251 | <i>Brachyspira pilosicoli</i>              | GCA_000296575.1_ASM29657v1_genomic.fna                         |
| 3252 | <i>Capnocytophaga canimorsus</i>           | GCA_002302565.1_ASM230256v1_genomic.fna                        |
| 3253 | <i>Cellulophaga lytica</i>                 | GCA_001941605.1_ASM194160v1_genomic.fna                        |
| 3254 | <i>Sinorhizobium fredii</i>                | GCA_002288485.1_ASM228848v1_genomic.fna                        |
| 3255 | <i>Vibrio anguillarum</i>                  | GCA_000786425.1_Vibrio_anguillarum_NB10_serovar_O1_genomic.fna |
| 3256 | <i>Mycoplasma hominis</i>                  | GCA_000947915.1_ASM94791v1_genomic.fna                         |
| 3257 | <i>Eubacterium limosum</i>                 | GCA_001481725.1_ASM148172v1_genomic.fna                        |
| 3258 | <i>Pseudoxanthomonas suwonensis</i>        | GCA_000972865.1_ASM97286v1_genomic.fna                         |
| 3259 | <i>Enterobacter hormaechei</i>             | GCA_000807425.4_ASM80742v4_genomic.fna                         |
| 3260 | <i>Weissella cibaria</i>                   | GCA_001951075.1_ASM195107v1_genomic.fna                        |
| 3261 | <i>Lactobacillus coryniformis</i>          | GCA_002706705.1_ASM270670v1_genomic.fna                        |



|      |                                        |                                                                             |
|------|----------------------------------------|-----------------------------------------------------------------------------|
| 3262 | <i>Leuconostoc gelidum</i>             | GCA_001536305.1_Leuconostoc_gelidum_subsp._gasicomitatum_KG16-1_genomic.fna |
| 3263 | <i>Nocardiopsis dassonvillei</i>       | GCA_002260685.1_ASM226068v1_genomic.fna                                     |
| 3264 | <i>Klebsiella aerogenes</i>            | GCA_001021995.1_ASM102199v1_genomic.fna                                     |
| 3265 | <i>Staphylococcus pseudintermedius</i> | GCA_001682335.1_ASM168233v1_genomic.fna                                     |
| 3266 | <i>Corynebacterium ulcerans</i>        | GCA_000306825.1_ASM30682v1_genomic.fna                                      |
| 3267 | <i>Chlamydia pecorum</i>               | GCA_000470805.1_ASM47080v1_genomic.fna                                      |
| 3268 | <i>Aeromonas veronii</i>               | GCA_001634325.1_ASM163432v1_genomic.fna                                     |
| 3269 | <i>Paenibacillus mucilaginosus</i>     | GCA_000258535.2_ASM25853v2_genomic.fna                                      |
| 3270 | <i>Burkholderia gladioli</i>           | GCA_002208175.1_ASM220817v1_genomic.fna                                     |
| 3271 | <i>Mycobacterium abscessus</i>         | GCA_000770125.1_ASM77012v1_genomic.fna                                      |
| 3272 | <i>Pseudomonas brassicacearum</i>      | GCA_001449085.1_ASM144908v1_genomic.fna                                     |
| 3273 | <i>Rickettsia amblyommatis</i>         | GCA_002078335.1_ASM207833v1_genomic.fna                                     |
| 3274 | <i>Burkholderia cepacia</i>            | GCA_000701165.2_ASM70116v2_genomic.fna                                      |
| 3275 | <i>Tetragenococcus halophilus</i>      | GCA_002243535.1_ASM224353v1_genomic.fna                                     |
| 3276 | <i>Enterococcus hirae</i>              | GCA_002278015.1_ASM227801v1_genomic.fna                                     |
| 3277 | <i>Hafnia alvei</i>                    | GCA_001636255.1_ASM163625v1_genomic.fna                                     |
| 3278 | <i>Streptomyces venezuelae</i>         | GCA_001886595.1_ASM188659v1_genomic.fna                                     |
| 3279 | <i>Lactobacillus curvatus</i>          | GCA_001698165.1_ASM169816v1_genomic.fna                                     |
| 3280 | <i>Pediococcus damnosus</i>            | GCA_001611075.1_ASM161107v1_genomic.fna                                     |
| 3281 | <i>Agrobacterium rhizogenes</i>        | GCA_002005205.2_ASM200520v2_genomic.fna                                     |
| 3282 | <i>Morganella morganii</i>             | GCA_002386305.1_ASM238630v1_genomic.fna                                     |
| 3283 | <i>Prevotella intermedia</i>           | GCA_001548195.1_ASM154819v1_genomic.fna                                     |
| 3284 | <i>Tannerella forsythia</i>            | GCA_001547875.1_ASM154787v1_genomic.fna                                     |
| 3285 | <i>Vibrio campbellii</i>               | GCA_001969325.1_ASM196932v1_genomic.fna                                     |
| 3286 | <i>Staphylococcus xylosus</i>          | GCA_000953575.1_Staphylococcus_xylosus_C2a_genomic.fna                      |
| 3287 | <i>Pseudomonas pseudoalcaligenes</i>   | GCA_002355475.1_ASM235547v1_genomic.fna                                     |
| 3288 | <i>Rickettsia japonica</i>             | GCA_002357115.1_ASM235711v1_genomic.fna                                     |
| 3289 | <i>Pediococcus clausenii</i>           | GCA_001702235.1_ASM170223v1_genomic.fna                                     |
| 3290 | <i>Moraxella bovoculi</i>              | GCA_000988655.1_ASM98865v1_genomic.fna                                      |
| 3291 | <i>Campylobacter sputorum</i>          | GCA_002220775.1_ASM222077v1_genomic.fna                                     |
| 3292 | <i>Enterococcus durans</i>             | GCA_002277935.1_ASM227793v1_genomic.fna                                     |
| 3293 | <i>Flavobacterium columnare</i>        | GCA_001641185.1_ASM164118v1_genomic.fna                                     |
| 3294 | <i>Francisella noatunensis</i>         | GCA_001042525.2_ASM104252v2_genomic.fna                                     |
| 3295 | <i>Piscirickettsia salmonis</i>        | GCA_000756435.3_ASM75643v3_genomic.fna                                      |

|      |                                               |                                         |
|------|-----------------------------------------------|-----------------------------------------|
| 3296 | <i>Elizabethkingia anophelis</i>              | GCA_001011675.1_ASM101167v1_genomic.fna |
| 3297 | <i>Pseudomonas monteilii</i>                  | GCA_000510325.1_ASM51032v1_genomic.fna  |
| 3298 | <i>Rhizobium phaseoli</i>                     | GCA_001664125.1_ASM166412v1_genomic.fna |
| 3299 | <i>Pseudoalteromonas luteoviolacea</i>        | GCA_001750405.1_ASM175040v1_genomic.fna |
| 3300 | <i>Xanthomonas fragariae</i>                  | GCA_900183975.1_PD885.1_genomic.fna     |
| 3301 | <i>Geobacillus thermoleovorans</i>            | GCA_001719205.1_ASM171920v1_genomic.fna |
| 3302 | <i>Pseudomonas chlororaphis</i>               | GCA_000963835.1_ASM96383v1_genomic.fna  |
| 3303 | <i>Serratia plymuthica</i>                    | GCA_000261045.2_ASM26104v2_genomic.fna  |
| 3304 | <i>Alcaligenes faecalis</i>                   | GCA_002242175.1_ASM224217v1_genomic.fna |
| 3305 | <i>Phaeobacter inhibens</i>                   | GCA_001969345.1_ASM196934v1_genomic.fna |
| 3306 | <i>Alteromonas stellipolaris</i>              | GCA_001632765.1_ASM163276v1_genomic.fna |
| 3307 | <i>Staphylococcus equorum</i>                 | GCA_001683315.1_ASM168331v1_genomic.fna |
| 3308 | <i>Paraburkholderia caribensis</i>            | GCA_001611015.1_ASM161101v1_genomic.fna |
| 3309 | <i>Acidipropionibacterium acidipropionici</i> | GCA_001602115.1_ASM160211v1_genomic.fna |
| 3310 | <i>Leptolyngbya boryana</i>                   | GCA_002368255.1_ASM236825v1_genomic.fna |
| 3311 | <i>Bordetella holmesii</i>                    | GCA_000341485.2_ASM34148v2_genomic.fna  |
| 3312 | <i>Bacillus safensis</i>                      | GCA_001938685.1_ASM193868v1_genomic.fna |
| 3313 | <i>Rhodovulum sulfidophilum</i>               | GCA_001548075.1_ASM154807v1_genomic.fna |
| 3314 | <i>Thalassolituus oleivorans</i>              | GCA_001932535.1_ASM193253v1_genomic.fna |
| 3315 | <i>Cedecea neteri</i>                         | GCA_000758325.1_ASM75832v1_genomic.fna  |
| 3316 | <i>Chryseobacterium indologenes</i>           | GCA_002208925.1_ASM220892v1_genomic.fna |
| 3317 | <i>Sphingopyxis macrogoltabida</i>            | GCA_001610995.1_ASM161099v1_genomic.fna |
| 3318 | <i>Vibrio natriegens</i>                      | GCA_001680045.1_ASM168004v1_genomic.fna |
| 3319 | <i>Pseudomonas protegens</i>                  | GCA_002006545.1_ASM200654v1_genomic.fna |
| 3320 | <i>Clostridium stercorarium</i>               | GCA_001697245.1_ASM169724v1_genomic.fna |
| 3321 | <i>Citrobacter amalonaticus</i>               | GCA_001559075.1_ASM155907v1_genomic.fna |
| 3322 | <i>Bibersteinia trehalosi</i>                 | GCA_000521745.1_ASM52174v1_genomic.fna  |
| 3323 | <i>Serratia liquefaciens</i>                  | GCA_001559135.1_ASM155913v1_genomic.fna |
| 3324 | <i>Raoultella ornithinolytica</i>             | GCA_001455225.1_ASM145522v1_genomic.fna |
| 3325 | <i>Brochothrix thermosphacta</i>              | GCA_002442515.1_ASM244251v1_genomic.fna |
| 3326 | <i>Corynebacterium stationis</i>              | GCA_002024345.1_ASM202434v1_genomic.fna |
| 3327 | <i>Weissella ceti</i>                         | GCA_000750515.1_ASM75051v1_genomic.fna  |
| 3328 | <i>Mannheimia varigena</i>                    | GCA_000521695.1_ASM52169v1_genomic.fna  |
| 3329 | <i>Trueperella pyogenes</i>                   | GCA_000816065.1_ASM81606v1_genomic.fna  |

|      |                                       |                                                |
|------|---------------------------------------|------------------------------------------------|
| 3330 | <i>Sporosarcina ureae</i>             | GCA_002101375.1_ASM210137v1_genomic.fna        |
| 3331 | <i>Mycobacterium yongonense</i>       | GCA_002148195.1_ASM214819v1_genomic.fna        |
| 3332 | <i>Bordetella hinzii</i>              | GCA_900186895.1_48450_A02_genomic.fna          |
| 3333 | <i>Clostridium saccharobutylicum</i>  | GCA_002003325.1_ASM200332v1_genomic.fna        |
| 3334 | <i>Bradyrhizobium diazoefficiens</i>  | GCA_001642675.1_ASM164267v1_genomic.fna        |
| 3335 | <i>Clostridium chauvoei</i>           | GCA_002327205.1_ASM232720v1_genomic.fna        |
| 3336 | <i>Streptomyces lydicus</i>           | GCA_001984445.1_ASM198444v1_genomic.fna        |
| 3337 | <i>Pandoraea pnomenusa</i>            | GCA_000590495.2_ASM59049v2_genomic.fna         |
| 3338 | <i>Bacillus velezensis</i>            | GCA_000284395.1_ASM28439v1_genomic.fna         |
| 3339 | <i>Klebsiella michiganensis</i>       | GCA_000632415.1_ASM63241v1_genomic.fna         |
| 3340 | <i>Acidihalobacter prosperus</i>      | GCA_001753245.1_ASM175324v1_genomic.fna        |
| 3341 | <i>Collimonas arenae</i>              | GCA_001584205.1_ASM158420v1_genomic.fna        |
| 3342 | <i>Fusobacterium hwasookii</i>        | GCA_001455145.1_ASM145514v1_genomic.fna        |
| 3343 | <i>Pseudomonas frederiksbergensis</i> | GCA_002355315.1_ASM235531v1_genomic.fna        |
| 3344 | <i>Pandoraea apista</i>               | GCA_001027265.1_ASM102726v1_genomic.fna        |
| 3345 | <i>Campylobacter iguaniorum</i>       | GCA_001643995.1_ASM164399v1_genomic.fna        |
| 3346 | <i>Tatlockia micdadei</i>             | GCA_002085735.1_ASM208573v1_genomic.fna        |
| 3347 | <i>Luteibacter rhizovicinus</i>       | GCA_001887595.1_ASM188759v1_genomic.fna        |
| 3348 | <i>Klebsiella quasipneumoniae</i>     | GCA_002240315.1_ASM224031v1_genomic.fna        |
| 3349 | <i>Staphylococcus schleiferi</i>      | GCA_001188895.1_ASM118889v1_genomic.fna        |
| 3350 | <i>Oblitimonas alkaliphila</i>        | GCA_001267215.1_ASM126721v1_genomic.fna        |
| 3351 | <i>Mycobacterium chimaera</i>         | GCA_002219245.1_ASM221924v1_genomic.fna        |
| 3352 | <i>Lactobacillus paracollinoides</i>  | GCA_001702195.1_ASM170219v1_genomic.fna        |
| 3353 | <i>Methylobacterium koyamae</i>       | GCA_002441955.1_ASM244195v1_genomic.fna        |
| 3354 | <i>Blastochloris viridis</i>          | GCA_001548155.2_BV133_assembly_1.0_genomic.fna |
| 3355 | <i>Bacillus paralicheniformis</i>     | GCA_002068155.1_ASM206815v1_genomic.fna        |
| 3356 | <i>Alteromonas mediterranea</i>       | GCA_000439495.1_ASM43949v1_genomic.fna         |
| 3357 | <i>Enterobacter cloacae</i>           | GCA_001729745.1_ASM172974v1_genomic.fna        |
| 3358 | <i>Polynucleobacter asymbioticus</i>  | GCA_001874565.1_ASM187456v1_genomic.fna        |
| 3359 | <i>Lactobacillus backii</i>           | GCA_001663715.1_ASM166371v1_genomic.fna        |
| 3360 | <i>Bartonella apis</i>                | GCA_002007505.1_ASM200750v1_genomic.fna        |
| 3361 | <i>Campylobacter pinnipediorum</i>    | GCA_002021965.1_ASM202196v1_genomic.fna        |
| 3362 | <i>Phaeobacter piscinae</i>           | GCA_002412045.1_ASM241204v1_genomic.fna        |
| 3363 | <i>Campylobacter pinnipediorum</i>    | GCA_002021985.1_ASM202198v1_genomic.fna        |

|      |                                               |                                         |
|------|-----------------------------------------------|-----------------------------------------|
| 3364 | <i>Lactobacillus backii</i>                   | GCA_001663735.1_ASM166373v1_genomic.fna |
| 3365 | <i>Polynucleobacter asymbioticus</i>          | GCA_001874585.1_ASM187458v1_genomic.fna |
| 3366 | <i>Alteromonas mediterranea</i>               | GCA_000439535.1_ASM43953v1_genomic.fna  |
| 3367 | <i>Bacillus paralicheniformis</i>             | GCA_002393225.1_ASM239322v1_genomic.fna |
| 3368 | <i>Mycobacterium chimaera</i>                 | GCA_002219265.1_ASM221926v1_genomic.fna |
| 3369 | <i>Oblitimonas alkaliphila</i>                | GCA_001267255.1_ASM126725v1_genomic.fna |
| 3370 | <i>Staphylococcus schleiferi</i>              | GCA_001188915.1_ASM118891v1_genomic.fna |
| 3371 | <i>Klebsiella quasipneumoniae</i>             | GCA_002240335.1_ASM224033v1_genomic.fna |
| 3372 | <i>Pandoraea apista</i>                       | GCA_001465595.2_ASM146559v2_genomic.fna |
| 3373 | <i>Klebsiella michiganensis</i>               | GCA_000724525.1_ASM72452v1_genomic.fna  |
| 3374 | <i>Bacillus velezensis</i>                    | GCA_000319475.1_ASM31947v1_genomic.fna  |
| 3375 | <i>Pandoraea pnomenusa</i>                    | GCA_000604065.3_ASM60406v3_genomic.fna  |
| 3376 | <i>Bradyrhizobium diazoefficiens</i>          | GCA_001908315.1_ASM190831v1_genomic.fna |
| 3377 | <i>Clostridium saccharobutylicum</i>          | GCA_002003365.1_ASM200336v1_genomic.fna |
| 3378 | <i>Sporosarcina ureae</i>                     | GCA_002109325.1_ASM210932v1_genomic.fna |
| 3379 | <i>Trueperella pyogenes</i>                   | GCA_001281085.1_ASM128108v1_genomic.fna |
| 3380 | <i>Raoultella ornithinolytica</i>             | GCA_001700855.1_ASM170085v1_genomic.fna |
| 3381 | <i>Bibersteinia trehalosi</i>                 | GCA_000521765.1_ASM52176v1_genomic.fna  |
| 3382 | <i>Clostridium stercorearium</i>              | GCA_001697285.1_ASM169728v1_genomic.fna |
| 3383 | <i>Pseudomonas protegens</i>                  | GCA_002208745.1_ASM220874v1_genomic.fna |
| 3384 | <i>Vibrio natriegens</i>                      | GCA_001680065.1_ASM168006v1_genomic.fna |
| 3385 | <i>Cedecea neteri</i>                         | GCA_002393445.1_ASM239344v1_genomic.fna |
| 3386 | <i>Rhodovulum sulfidophilum</i>               | GCA_001633145.1_ASM163314v1_genomic.fna |
| 3387 | <i>Enterobacter cloacae</i>                   | GCA_000807415.4_ASM80741v4_genomic.fna  |
| 3388 | <i>Bacillus safensis</i>                      | GCA_001938705.1_ASM193870v1_genomic.fna |
| 3389 | <i>Bordetella holmesii</i>                    | GCA_000765395.1_ASM76539v1_genomic.fna  |
| 3390 | <i>Acidipropionibacterium acidipropionici</i> | GCA_001855335.1_ASM185533v1_genomic.fna |
| 3391 | <i>Alteromonas stellipolaris</i>              | GCA_001632825.1_ASM163282v1_genomic.fna |
| 3392 | <i>Alcaligenes faecalis</i>                   | GCA_002443155.1_ASM244315v1_genomic.fna |
| 3393 | <i>Serratia plymuthica</i>                    | GCA_000438825.1_ASM43882v1_genomic.fna  |
| 3394 | <i>Pseudomonas chlororaphis</i>               | GCA_001023535.1_ASM102353v1_genomic.fna |
| 3395 | <i>Xanthomonas fragariae</i>                  | GCA_900183985.1_NBC2815.1_genomic.fna   |
| 3396 | <i>Rhizobium phaseoli</i>                     | GCA_001664165.1_ASM166416v1_genomic.fna |
| 3397 | <i>Elizabethkingia anophelis</i>              | GCA_001596175.2_ASM159617v2_genomic.fna |

|      |                                        |                                         |
|------|----------------------------------------|-----------------------------------------|
| 3398 | <i>Francisella noatunensis</i>         | GCA_001042545.2_ASM104254v2_genomic.fna |
| 3399 | <i>Piscirickettsia salmonis</i>        | GCA_001514395.1_ASM151439v1_genomic.fna |
| 3400 | <i>Flavobacterium columnare</i>        | GCA_001677395.1_ASM167739v1_genomic.fna |
| 3401 | <i>Campylobacter sputorum</i>          | GCA_002220795.1_ASM222079v1_genomic.fna |
| 3402 | <i>Moraxella bovoculi</i>              | GCA_000988685.1_ASM98868v1_genomic.fna  |
| 3403 | <i>Rickettsia japonica</i>             | GCA_002357135.1_ASM235713v1_genomic.fna |
| 3404 | <i>Staphylococcus xylosus</i>          | GCA_002078255.1_ASM207825v1_genomic.fna |
| 3405 | <i>Vibrio campbellii</i>               | GCA_002140055.1_ASM214005v1_genomic.fna |
| 3406 | <i>Clostridium pasteurianum</i>        | GCA_000807175.1_ASM80717v1_genomic.fna  |
| 3407 | <i>Prevotella intermedia</i>           | GCA_001953935.1_ASM195393v1_genomic.fna |
| 3408 | <i>Pediococcus damnosus</i>            | GCA_001611115.1_ASM161111v1_genomic.fna |
| 3409 | <i>Lactobacillus curvatus</i>          | GCA_001723545.1_ASM172354v1_genomic.fna |
| 3410 | <i>Burkholderia cepacia</i>            | GCA_000755805.1_ASM75580v1_genomic.fna  |
| 3411 | <i>Pseudomonas brassicacearum</i>      | GCA_001746815.1_ASM174681v1_genomic.fna |
| 3412 | <i>Burkholderia gladioli</i>           | GCA_002393425.1_ASM239342v1_genomic.fna |
| 3413 | <i>Chlamydia pecorum</i>               | GCA_000470825.1_ASM47082v1_genomic.fna  |
| 3414 | <i>Corynebacterium ulcerans</i>        | GCA_000499805.2_ASM49980v2_genomic.fna  |
| 3415 | <i>Staphylococcus pseudintermedius</i> | GCA_001682435.2_ASM168243v2_genomic.fna |
| 3416 | <i>Klebsiella aerogenes</i>            | GCA_001559215.1_ASM155921v1_genomic.fna |
| 3417 | <i>Weissella cibaria</i>               | GCA_001951095.1_ASM195109v1_genomic.fna |
| 3418 | <i>Enterobacter hormaechei</i>         | GCA_000814125.3_ASM81412v3_genomic.fna  |
| 3419 | <i>Mycoplasma hominis</i>              | GCA_001017595.1_ASM101759v1_genomic.fna |
| 3420 | <i>Vibrio anguillarum</i>              | GCA_001660505.1_ASM166050v1_genomic.fna |
| 3421 | <i>Capnocytophaga canimorsus</i>       | GCA_002302655.1_ASM230265v1_genomic.fna |
| 3422 | <i>Citrobacter freundii</i>            | GCA_001281005.1_ASM128100v1_genomic.fna |
| 3423 | <i>Ketogulonicigenium vulgare</i>      | GCA_001693655.1_ASM169365v1_genomic.fna |
| 3424 | <i>Taylorella equigenitalis</i>        | GCA_002288125.1_ASM228812v1_genomic.fna |
| 3425 | <i>Streptococcus gallolyticus</i>      | GCA_000270145.1_ASM27014v1_genomic.fna  |
| 3426 | <i>Amycolatopsis mediterranei</i>      | GCA_000454025.1_ASM45402v1_genomic.fna  |
| 3427 | <i>Pantoea ananatis</i>                | GCA_000283875.1_ASM28387v1_genomic.fna  |
| 3428 | <i>Streptococcus anginosus</i>         | GCA_000831165.1_ASM83116v1_genomic.fna  |
| 3429 | <i>Staphylococcus lugdunensis</i>      | GCA_001558815.1_ASM155881v1_genomic.fna |
| 3430 | <i>Riemerella anatipestifer</i>        | GCA_000295655.1_ASM29565v1_genomic.fna  |
| 3431 | <i>Acinetobacter pittii</i>            | GCA_002012285.1_ASM201228v1_genomic.fna |

|      |                                              |                                         |
|------|----------------------------------------------|-----------------------------------------|
| 3432 | <i>Mesorhizobium ciceri</i>                  | GCA_001618845.1_ASM161884v1_genomic.fna |
| 3433 | <i>Enterobacter asburiae</i>                 | GCA_001521715.1_ASM152171v1_genomic.fna |
| 3434 | <i>Corynebacterium pseudotuberculosis</i>    | GCA_000152065.2_ASM15206v2_genomic.fna  |
| 3435 | <i>Parageobacillus thermoglucosidasius</i>   | GCA_001902495.1_ASM190249v1_genomic.fna |
| 3436 | <i>Vibrio coralliilyticus</i>                | GCA_002073995.1_ASM207399v1_genomic.fna |
| 3437 | <i>Pediococcus acidilactici</i>              | GCA_002173595.1_ASM217359v1_genomic.fna |
| 3438 | <i>Vibrio alginolyticus</i>                  | GCA_001679745.1_ASM167974v1_genomic.fna |
| 3439 | <i>Xanthomonas fuscans</i>                   | GCA_001610915.1_ASM161091v1_genomic.fna |
| 3440 | <i>Achromobacter xylosoxidans</i>            | GCA_001051055.1_ASM105105v1_genomic.fna |
| 3441 | <i>Bacillus atrophaeus</i>                   | GCA_002243495.1_ASM224349v1_genomic.fna |
| 3442 | <i>Klebsiella variicola</i>                  | GCA_001278905.1_ASM127890v1_genomic.fna |
| 3443 | <i>Erysipelothrix rhusiopathiae</i>          | GCA_001723625.1_ASM172362v1_genomic.fna |
| 3444 | <i>Lactobacillus paracasei</i>               | GCA_000582665.1_ASM58266v1_genomic.fna  |
| 3445 | <i>Gardnerella vaginalis</i>                 | GCA_001042655.1_ASM104265v1_genomic.fna |
| 3446 | <i>Mycoplasma hyorhinis</i>                  | GCA_000241125.1_ASM24112v1_genomic.fna  |
| 3447 | <i>Streptomyces hygroscopicus</i>            | GCA_002021875.1_ASM202187v1_genomic.fna |
| 3448 | <i>Streptococcus intermedius</i>             | GCA_002073355.1_ASM207335v1_genomic.fna |
| 3449 | <i>Serratia symbiotica</i>                   | GCA_000238975.1_ASM23897v1_genomic.fna  |
| 3450 | <i>Aggregatibacter actinomycetemcomitans</i> | GCA_000604045.1_ASM60404v1_genomic.fna  |
| 3451 | <i>Streptomyces albus</i>                    | GCA_000359525.1_ASM35952v1_genomic.fna  |
| 3452 | <i>Pectobacterium carotovorum</i>            | GCA_002068115.1_ASM206811v1_genomic.fna |
| 3453 | <i>Variovorax paradoxus</i>                  | GCA_000463015.1_ASM46301v1_genomic.fna  |
| 3454 | <i>Yersinia ruckeri</i>                      | GCA_002442495.1_ASM244249v1_genomic.fna |
| 3455 | <i>Escherichia albertii</i>                  | GCA_002285475.1_ASM228547v1_genomic.fna |
| 3456 | <i>Edwardsiella tarda</i>                    | GCA_002504285.1_ASM250428v1_genomic.fna |
| 3457 | <i>Mycobacterium intracellulare</i>          | GCA_002285675.1_ASM228567v1_genomic.fna |
| 3458 | <i>Arcobacter butzleri</i>                   | GCA_900187115.1_51699_F01_genomic.fna   |
| 3459 | <i>Paenibacillus larvae</i>                  | GCA_002043025.1_ASM204302v1_genomic.fna |
| 3460 | <i>Lactobacillus sakei</i>                   | GCA_002370355.1_ASM237035v1_genomic.fna |
| 3461 | <i>Lactobacillus johnsonii</i>               | GCA_000498675.1_ASM49867v1_genomic.fna  |
| 3462 | <i>Rhodococcus erythropolis</i>              | GCA_000975175.1_ASM97517v1_genomic.fna  |
| 3463 | <i>Clostridium butyricum</i>                 | GCA_001746555.1_ASM174655v1_genomic.fna |
| 3464 | <i>Flavobacterium psychrophilum</i>          | GCA_000754405.1_ASM75440v1_genomic.fna  |
| 3465 | <i>Lysinibacillus sphaericus</i>             | GCA_001629735.1_ASM162973v1_genomic.fna |

|      |                                         |                                                       |
|------|-----------------------------------------|-------------------------------------------------------|
| 3466 | <i>Burkholderia ubonensis</i>           | GCA_001718695.1_ASM171869v1_genomic.fna               |
| 3467 | <i>Pseudomonas mendocina</i>            | GCA_002442555.1_ASM244255v1_genomic.fna               |
| 3468 | <i>Granulibacter bethesdensis</i>       | GCA_000576185.2_ASM57618v2_genomic.fna                |
| 3469 | <i>Propionibacterium freudenreichii</i> | GCA_900016155.1_PFREUDJS1_genomic.fna                 |
| 3470 | <i>Aeromonas hydrophila</i>             | GCA_000612075.2_ASM61207v2_genomic.fna                |
| 3471 | <i>Pseudomonas stutzeri</i>             | GCA_000195105.1_ASM19510v1_genomic.fna                |
| 3472 | <i>Paenibacillus polymyxa</i>           | GCA_000507205.2_ASM50720v2_genomic.fna                |
| 3473 | <i>Mycobacterium abscessus</i>          | GCA_000497265.2_ASM49726v2_genomic.fna                |
| 3474 | <i>Bacillus coagulans</i>               | GCA_000876545.1_ASM87654v1_genomic.fna                |
| 3475 | <i>Staphylococcus saprophyticus</i>     | GCA_001558375.1_ASM155837v1_genomic.fna               |
| 3476 | <i>Bifidobacterium breve</i>            | GCA_000568955.1_ASM56895v1_genomic.fna                |
| 3477 | <i>Listeria ivanovii</i>                | GCA_000763495.1_ASM76349v1_genomic.fna                |
| 3478 | <i>Moraxella catarrhalis</i>            | GCA_002073215.1_ASM207321v1_genomic.fna               |
| 3479 | <i>Enterobacter cloacae</i>             | GCA_000286275.1_ASM28627v1_genomic.fna                |
| 3480 | <i>Gluconobacter oxydans</i>            | GCA_001680825.1_ASM168082v1_genomic.fna               |
| 3481 | <i>Lactobacillus salivarius</i>         | GCA_001011095.1_ASM101109v1_genomic.fna               |
| 3482 | <i>Cronobacter sakazakii</i>            | GCA_000339015.1_ASM33901v1_genomic.fna                |
| 3483 | <i>Clostridium beijerinckii</i>         | GCA_000767745.1_ASM76774v1_genomic.fna                |
| 3484 | <i>Proteus mirabilis</i>                | GCA_001640985.1_ASM164098v1_genomic.fna               |
| 3485 | <i>Klebsiella oxytoca</i>               | GCA_001022295.1_ASM102229v1_genomic.fna               |
| 3486 | <i>Campylobacter lari</i>               | GCA_000816385.2_ASM81638v2_genomic.fna                |
| 3487 | <i>Mycoplasma bovis</i>                 | GCA_000696015.1_ASM69601v1_genomic.fna                |
| 3488 | <i>Campylobacter coli</i>               | GCA_000583755.1_ASM58375v1_genomic.fna                |
| 3489 | <i>Propionibacterium acnes</i>          | GCA_000217615.1_ASM21761v1_genomic.fna                |
| 3490 | <i>Burkholderia vietnamiensis</i>       | GCA_001718815.1_ASM171881v1_genomic.fna               |
| 3491 | <i>Mesoplasma florum</i>                | GCA_002504385.1_ASM250438v1_genomic.fna               |
| 3492 | <i>Moorella thermoacetica</i>           | GCA_001729945.1_ASM172994v1_genomic.fna               |
| 3493 | <i>Mycoplasma gallisepticum</i>         | GCA_000211545.6_ASM21154v6_genomic.fna                |
| 3494 | <i>Serratia marcescens</i>              | GCA_000828775.1_ASM82877v1_genomic.fna                |
| 3495 | <i>Lactobacillus brevis</i>             | GCA_002117225.1_ASM211722v1_genomic.fna               |
| 3496 | <i>Pediococcus pentosaceus</i>          | GCA_002173535.1_ASM217353v1_genomic.fna               |
| 3497 | <i>Mannheimia haemolytica</i>           | GCA_000422095.1_ASM42209v1_genomic.fna                |
| 3498 | <i>Bartonella henselae</i>              | GCA_001291465.1_Bartonella_henselae_MVT02_genomic.fna |
| 3499 | <i>Lactobacillus acidophilus</i>        | GCA_002224305.1_ASM222430v1_genomic.fna               |

|      |                                     |                                         |
|------|-------------------------------------|-----------------------------------------|
| 3500 | <i>Salmonella bongori</i>           | GCA_002211925.1_ASM221192v1_genomic.fna |
| 3501 | <i>Chlamydia abortus</i>            | GCA_900002505.1_CA1H_genomic.fna        |
| 3502 | <i>Anaplasma phagocytophilum</i>    | GCA_000689635.2_ASM68963v2_genomic.fna  |
| 3503 | <i>Lactobacillus plantarum</i>      | GCA_000338115.2_ASM33811v2_genomic.fna  |
| 3504 | <i>Leifsonia xyli</i>               | GCA_000007665.1_ASM766v1_genomic.fna    |
| 3505 | <i>Leuconostoc mesenteroides</i>    | GCA_001047695.1_ASM104769v1_genomic.fna |
| 3506 | <i>Chlamydia muridarum</i>          | GCA_000767445.1_ASM76744v1_genomic.fna  |
| 3507 | <i>Dehalococcoides mccartyi</i>     | GCA_000016705.1_ASM1670v1_genomic.fna   |
| 3508 | <i>Yersinia enterocolitica</i>      | GCA_000834195.1_ASM83419v1_genomic.fna  |
| 3509 | <i>Thermotoga maritima</i>          | GCA_000978535.1_ASM97853v1_genomic.fna  |
| 3510 | <i>Mycoplasma pneumoniae</i>        | GCA_000319655.2_ASM31965v2_genomic.fna  |
| 3511 | <i>Mycobacterium smegmatis</i>      | GCA_000767665.1_ASM76766v1_genomic.fna  |
| 3512 | <i>Corynebacterium diphtheriae</i>  | GCA_000241895.1_ASM24189v1_genomic.fna  |
| 3513 | <i>Streptococcus gordonii</i>       | GCA_002073435.1_ASM207343v1_genomic.fna |
| 3514 | <i>Haemophilus ducreyi</i>          | GCA_001647735.1_ASM164773v1_genomic.fna |
| 3515 | <i>Bordetella pertussis</i>         | GCA_000306945.1_ASM30694v1_genomic.fna  |
| 3516 | <i>Bordetella bronchiseptica</i>    | GCA_000829175.1_ASM82917v1_genomic.fna  |
| 3517 | <i>Sinorhizobium meliloti</i>       | GCA_000218265.1_ASM21826v1_genomic.fna  |
| 3518 | <i>Providencia stuartii</i>         | GCA_001888205.1_ASM188820v1_genomic.fna |
| 3519 | <i>Bacillus megaterium</i>          | GCA_000025825.1_ASM2582v1_genomic.fna   |
| 3520 | <i>Brucella melitensis</i>          | GCA_000192885.1_ASM19288v1_genomic.fna  |
| 3521 | <i>Caulobacter vibrioides</i>       | GCA_002310295.1_ASM231029v1_genomic.fna |
| 3522 | <i>Francisella philomiragia</i>     | GCA_000833255.1_ASM83325v1_genomic.fna  |
| 3523 | <i>Lactobacillus rhamnosus</i>      | GCA_000233755.1_ASM23375v1_genomic.fna  |
| 3524 | <i>Pasteurella multocida</i>        | GCA_000255915.1_ASM25591v1_genomic.fna  |
| 3525 | <i>Acetobacter pasteurianus</i>     | GCA_000010865.1_ASM1086v1_genomic.fna   |
| 3526 | <i>Haemophilus parasuis</i>         | GCA_001611775.1_ASM161177v1_genomic.fna |
| 3527 | <i>Zymomonas mobilis</i>            | GCA_000024245.1_ASM2424v1_genomic.fna   |
| 3528 | <i>Streptococcus equi</i>           | GCA_000219765.1_ASM21976v1_genomic.fna  |
| 3529 | <i>Bifidobacterium bifidum</i>      | GCA_001025135.1_ASM102513v1_genomic.fna |
| 3530 | <i>Stenotrophomonas maltophilia</i> | GCA_000284595.1_ASM28459v1_genomic.fna  |
| 3531 | <i>Alteromonas macleodii</i>        | GCA_000300175.1_ASM30017v1_genomic.fna  |
| 3532 | <i>Bacillus mycoides</i>            | GCA_000832885.1_ASM83288v1_genomic.fna  |
| 3533 | <i>Enterococcus faecium</i>         | GCA_000444405.1_ASM44440v1_genomic.fna  |



|      |                                       |                                         |
|------|---------------------------------------|-----------------------------------------|
| 3534 | <i>Streptococcus mutans</i>           | GCA_000284575.1_ASM28457v1_genomic.fna  |
| 3535 | <i>Neisseria gonorrhoeae</i>          | GCA_001047225.1_ASM104722v1_genomic.fna |
| 3536 | <i>Bacillus amyloliquefaciens</i>     | GCA_000221645.1_ASM22164v1_genomic.fna  |
| 3537 | <i>Chlamydia psittaci</i>             | GCA_000270405.1_ASM27040v1_genomic.fna  |
| 3538 | <i>Bifidobacterium animalis</i>       | GCA_000025245.1_ASM2524v1_genomic.fna   |
| 3539 | <i>Borrelia garinii</i>               | GCA_000691545.1_ASM69154v1_genomic.fna  |
| 3540 | <i>Ruminiclostridium thermocellum</i> | GCA_001692755.1_ASM169275v1_genomic.fna |
| 3541 | <i>Rhizobium etli</i>                 | GCA_000816125.1_ASM81612v1_genomic.fna  |
| 3542 | <i>Streptococcus dysgalactiae</i>     | GCA_000307185.1_ASM30718v1_genomic.fna  |
| 3543 | <i>Microcystis aeruginosa</i>         | GCA_002095975.1_ASM209597v1_genomic.fna |
| 3544 | <i>Enterococcus faecalis</i>          | GCA_000211255.2_ASM21125v2_genomic.fna  |
| 3545 | <i>Brucella suis</i>                  | GCA_000236255.1_ASM23625v1_genomic.fna  |
| 3546 | <i>Rhizobium leguminosarum</i>        | GCA_000009265.1_ASM926v1_genomic.fna    |
| 3547 | <i>Brucella canis</i>                 | GCA_000740335.1_ASM74033v1_genomic.fna  |
| 3548 | <i>Clavibacter michiganensis</i>      | GCA_000958465.1_ASM95846v1_genomic.fna  |
| 3549 | <i>Borrelia burgdorferi</i>           | GCA_000166655.2_ASM16665v1_genomic.fna  |
| 3550 | <i>Klebsiella pneumoniae</i>          | GCA_000019565.1_ASM1956v1_genomic.fna   |
| 3551 | <i>Rickettsia prowazekii</i>          | GCA_000277185.1_ASM27718v1_genomic.fna  |
| 3552 | <i>Burkholderia multivorans</i>       | GCA_000959525.1_ASM95952v1_genomic.fna  |
| 3553 | <i>Clostridium botulinum</i>          | GCA_000204565.1_ASM20456v1_genomic.fna  |
| 3554 | <i>Phaeobacter gallaeciensis</i>      | GCA_002381305.1_ASM238130v1_genomic.fna |
| 3555 | <i>Burkholderia thailandensis</i>     | GCA_000567925.1_ASM56792v1_genomic.fna  |
| 3556 | <i>Mycoplasma mycoides</i>            | GCA_000143865.1_ASM14386v1_genomic.fna  |
| 3557 | <i>Ureaplasma parvum</i>              | GCA_002205515.1_ASM220551v1_genomic.fna |
| 3558 | <i>Porphyromonas gingivalis</i>       | GCA_001263815.1_ASM126381v1_genomic.fna |
| 3559 | <i>Lactobacillus fermentum</i>        | GCA_000466785.3_ASM46678v3_genomic.fna  |
| 3560 | <i>Vibrio parahaemolyticus</i>        | GCA_000430425.1_ASM43042v1_genomic.fna  |
| 3561 | <i>Methylobacterium extorquens</i>    | GCA_000083545.1_ASM8354v1_genomic.fna   |
| 3562 | <i>Borrelia afzelii</i>               | GCA_000962775.1_ASM96277v1_genomic.fna  |
| 3563 | <i>Rickettsia rickettsii</i>          | GCA_000283795.1_ASM28379v1_genomic.fna  |
| 3564 | <i>Lactobacillus helveticus</i>       | GCA_000189515.1_ASM18951v1_genomic.fna  |
| 3565 | <i>Bacillus subtilis</i>              | GCA_000209795.2_ASM20979v2_genomic.fna  |
| 3566 | <i>Desulfovibrio vulgaris</i>         | GCA_000166115.1_ASM16611v1_genomic.fna  |
| 3567 | <i>Lactobacillus casei</i>            | GCA_000194785.1_ASM19478v1_genomic.fna  |

|      |                                    |                                                     |
|------|------------------------------------|-----------------------------------------------------|
| 3568 | <i>Coxiella burnetii</i>           | GCA_000019865.1_ASM1986v1_genomic.fna               |
| 3569 | <i>Clostridioides difficile</i>    | GCA_000932055.2_ASM93205v2_genomic.fna              |
| 3570 | <i>Aeromonas salmonicida</i>       | GCA_002214305.1_ASM221430v1_genomic.fna             |
| 3571 | <i>Xanthomonas oryzae</i>          | GCA_000940825.1_ASM94082v1_genomic.fna              |
| 3572 | <i>Campylobacter fetus</i>         | GCA_000512745.2_ASM51274v2_genomic.fna              |
| 3573 | <i>Xanthomonas citri</i>           | GCA_000816885.1_ASM81688v1_genomic.fna              |
| 3574 | <i>Mycoplasma capricolum</i>       | GCA_000952915.1_9231-Abomsa_assembly_V8_genomic.fna |
| 3575 | <i>Lactobacillus delbrueckii</i>   | GCA_000191165.1_ASM19116v1_genomic.fna              |
| 3576 | <i>Brucella abortus</i>            | GCA_000238175.1_ASM23817v1_genomic.fna              |
| 3577 | <i>Francisella tularensis</i>      | GCA_000011405.1_ASM1140v1_genomic.fna               |
| 3578 | <i>Yersinia pseudotuberculosis</i> | GCA_000047365.1_ASM4736v1_genomic.fna               |
| 3579 | <i>Rhodobacter sphaeroides</i>     | GCA_000021005.1_ASM2100v1_genomic.fna               |
| 3580 | <i>Streptococcus salivarius</i>    | GCA_000305335.2_ASM30533v2_genomic.fna              |
| 3581 | <i>Vibrio cholerae</i>             | GCA_000021625.1_ASM2162v1_genomic.fna               |
| 3582 | <i>Ralstonia solanacearum</i>      | GCA_001299555.1_ASM129955v1_genomic.fna             |
| 3583 | <i>Bacillus thuringiensis</i>      | GCA_000092165.1_ASM9216v1_genomic.fna               |
| 3584 | <i>Ehrlichia chaffeensis</i>       | GCA_000632885.1_ASM63288v1_genomic.fna              |
| 3585 | <i>Burkholderia mallei</i>         | GCA_000015625.1_ASM1562v1_genomic.fna               |
| 3586 | <i>Burkholderia pseudomallei</i>   | GCA_000015925.1_ASM1592v1_genomic.fna               |
| 3587 | <i>Shigella sonnei</i>             | GCA_001558295.1_ASM155829v1_genomic.fna             |
| 3588 | <i>Chlamydia trachomatis</i>       | GCA_000026905.1_ASM2690v1_genomic.fna               |
| 3589 | <i>Mycoplasma genitalium</i>       | GCA_000292485.1_ASM29248v1_genomic.fna              |
| 3590 | <i>Burkholderia cenocepacia</i>    | GCA_000203955.1_ASM20395v1_genomic.fna              |
| 3591 | <i>Corynebacterium glutamicum</i>  | GCA_000382905.1_ASM38290v1_genomic.fna              |
| 3592 | <i>Thermus thermophilus</i>        | GCA_000258245.1_ASM25824v1_genomic.fna              |
| 3593 | <i>Bacillus pumilus</i>            | GCA_000972685.1_ASM97268v1_genomic.fna              |
| 3594 | <i>Lactobacillus reuteri</i>       | GCA_000236455.2_ASM23645v2_genomic.fna              |
| 3595 | <i>Shewanella baltica</i>          | GCA_000018765.1_ASM1876v1_genomic.fna               |
| 3596 | <i>Streptococcus thermophilus</i>  | GCA_000014485.1_ASM1448v1_genomic.fna               |
| 3597 | <i>Legionella pneumophila</i>      | GCA_000092545.1_ASM9254v1_genomic.fna               |
| 3598 | <i>Bacteroides fragilis</i>        | GCA_000965785.1_ASM96578v1_genomic.fna              |
| 3599 | <i>Bacillus licheniformis</i>      | GCA_001726125.1_ASM172612v1_genomic.fna             |
| 3600 | <i>Acinetobacter baumannii</i>     | GCA_000021245.2_ASM2124v2_genomic.fna               |
| 3601 | <i>Streptococcus suis</i>          | GCA_000091905.1_ASM9190v1_genomic.fna               |

|      |                                        |                                         |
|------|----------------------------------------|-----------------------------------------|
| 3602 | <i>Mycoplasma hyopneumoniae</i>        | GCA_000183185.1_ASM18318v1_genomic.fna  |
| 3603 | <i>Vibrio vulnificus</i>               | GCA_000186585.1_ASM18658v1_genomic.fna  |
| 3604 | <i>Pseudomonas aeruginosa</i>          | GCA_000026645.1_ASM2664v1_genomic.fna   |
| 3605 | <i>Histophilus somni</i>               | GCA_002162195.1_ASM216219v1_genomic.fna |
| 3606 | <i>Pseudomonas syringae</i>            | GCA_000452705.3_ASM45270v3_genomic.fna  |
| 3607 | <i>Bifidobacterium longum</i>          | GCA_000092325.1_ASM9232v1_genomic.fna   |
| 3608 | <i>Shigella flexneri</i>               | GCA_000022245.1_ASM2224v1_genomic.fna   |
| 3609 | <i>Bacillus anthracis</i>              | GCA_000021445.1_ASM2144v1_genomic.fna   |
| 3610 | <i>Streptococcus agalactiae</i>        | GCA_000299135.1_ASM29913v1_genomic.fna  |
| 3611 | <i>Fusobacterium nucleatum</i>         | GCA_000163915.2_ASM16391v2_genomic.fna  |
| 3612 | <i>Leptospira interrogans</i>          | GCA_000941035.1_ASM94103v1_genomic.fna  |
| 3613 | <i>Streptococcus pneumoniae</i>        | GCA_000018965.1_ASM1896v1_genomic.fna   |
| 3614 | <i>Streptococcus pyogenes</i>          | GCA_000009385.1_ASM938v1_genomic.fna    |
| 3615 | <i>Pseudomonas putida</i>              | GCA_000019125.1_ASM1912v1_genomic.fna   |
| 3616 | <i>Xylella fastidiosa</i>              | GCA_000019765.1_ASM1976v1_genomic.fna   |
| 3617 | <i>Neisseria meningitidis</i>          | GCA_000014105.1_ASM1410v1_genomic.fna   |
| 3618 | <i>Chlamydophila pneumoniae</i>        | GCA_000024145.1_ASM2414v1_genomic.fna   |
| 3619 | <i>Buchnera aphidicola</i>             | GCA_000521565.1_ASM52156v1_genomic.fna  |
| 3620 | <i>Helicobacter pylori</i>             | GCA_000013245.1_ASM1324v1_genomic.fna   |
| 3621 | <i>Escherichia coli</i>                | GCA_000183345.1_ASM18334v1_genomic.fna  |
| 3622 | <i>Haemophilus influenzae</i>          | GCA_000165575.1_ASM16557v1_genomic.fna  |
| 3623 | <i>Prochlorococcus marinus</i>         | GCA_000012465.1_ASM1246v1_genomic.fna   |
| 3624 | <i>Actinobacillus pleuropneumoniae</i> | GCA_001460855.1_MIDG2331_genomic.fna    |
| 3625 | <i>Mycobacterium avium</i>             | GCA_000390085.1_ASM39008v1_genomic.fna  |
| 3626 | <i>Mycobacterium bovis</i>             | GCA_000194075.3_ASM19407v3_genomic.fna  |
| 3627 | <i>Mycobacterium tuberculosis</i>      | GCA_000016925.1_ASM1692v1_genomic.fna   |
| 3628 | <i>Clostridium perfringens</i>         | GCA_001304735.1_ASM130473v1_genomic.fna |
| 3629 | <i>Listeria monocytogenes</i>          | GCA_000022925.1_ASM2292v1_genomic.fna   |
| 3630 | <i>Bacillus cereus</i>                 | GCA_000013065.1_ASM1306v1_genomic.fna   |
| 3631 | <i>Staphylococcus epidermidis</i>      | GCA_000759555.1_ASM75955v1_genomic.fna  |
| 3632 | <i>Lactococcus lactis</i>              | GCA_000025045.1_ASM2504v1_genomic.fna   |
| 3633 | <i>Staphylococcus aureus</i>           | GCA_000009645.1_ASM964v1_genomic.fna    |
| 3634 | <i>Yersinia pestis</i>                 | GCA_000013805.1_ASM1380v1_genomic.fna   |
| 3635 | <i>Campylobacter jejuni</i>            | GCA_000015525.1_ASM1552v1_genomic.fna   |

|      |                                   |                                         |
|------|-----------------------------------|-----------------------------------------|
| 3636 | <i>Xanthomonas campestris</i>     | GCA_000221965.1_ASM22196v1_genomic.fna  |
| 3637 | <i>Pseudomonas fluorescens</i>    | GCA_000262325.2_ASM26232v2_genomic.fna  |
| 3638 | <i>Salmonella enterica</i>        | GCA_000008105.1_ASM810v1_genomic.fna    |
| 3639 | <i>Salmonella enterica</i>        | GCA_000009505.1_ASM950v1_genomic.fna    |
| 3640 | <i>Pseudomonas fluorescens</i>    | GCA_000293885.3_ASM29388v3_genomic.fna  |
| 3641 | <i>Xanthomonas campestris</i>     | GCA_000972745.1_ASM97274v1_genomic.fna  |
| 3642 | <i>Campylobacter jejuni</i>       | GCA_000017485.1_ASM1748v1_genomic.fna   |
| 3643 | <i>Yersinia pestis</i>            | GCA_000013825.1_ASM1382v1_genomic.fna   |
| 3644 | <i>Staphylococcus aureus</i>      | GCA_000009665.1_ASM966v1_genomic.fna    |
| 3645 | <i>Lactococcus lactis</i>         | GCA_000143205.1_ASM14320v1_genomic.fna  |
| 3646 | <i>Staphylococcus epidermidis</i> | GCA_001956655.2_ASM195665v2_genomic.fna |
| 3647 | <i>Bacillus cereus</i>            | GCA_000021205.1_ASM2120v1_genomic.fna   |
| 3648 | <i>Clostridium perfringens</i>    | GCA_001579765.1_ASM157976v1_genomic.fna |
| 3649 | <i>Listeria monocytogenes</i>     | GCA_000026705.1_ASM2670v1_genomic.fna   |
| 3650 | <i>Mycobacterium tuberculosis</i> | GCA_000023625.1_ASM2362v1_genomic.fna   |
| 3651 | <i>Mycobacterium bovis</i>        | GCA_000234725.1_ASM23472v1_genomic.fna  |
| 3652 | <i>Mycobacterium avium</i>        | GCA_000758285.1_ASM75828v1_genomic.fna  |
| 3653 | <i>Prochlorococcus marinus</i>    | GCA_000012645.1_ASM1264v1_genomic.fna   |
| 3654 | <i>Haemophilus influenzae</i>     | GCA_000197875.1_ASM19787v1_genomic.fna  |
| 3655 | <i>Escherichia coli</i>           | GCA_000299455.1_ASM29945v1_genomic.fna  |
| 3656 | <i>Helicobacter pylori</i>        | GCA_000020245.1_ASM2024v1_genomic.fna   |
| 3657 | <i>Buchnera aphidicola</i>        | GCA_000090965.1_ASM9096v1_genomic.fna   |
| 3658 | <i>Chlamydophila pneumoniae</i>   | GCA_000091085.2_ASM9108v2_genomic.fna   |
| 3659 | <i>Neisseria meningitidis</i>     | GCA_000026965.1_ASM2696v1_genomic.fna   |
| 3660 | <i>Xylella fastidiosa</i>         | GCA_000148405.1_ASM14840v1_genomic.fna  |
| 3661 | <i>Pseudomonas putida</i>         | GCA_000019445.1_ASM1944v1_genomic.fna   |
| 3662 | <i>Streptococcus pyogenes</i>     | GCA_000011285.1_ASM1128v1_genomic.fna   |
| 3663 | <i>Streptococcus pneumoniae</i>   | GCA_000018985.1_ASM1898v1_genomic.fna   |
| 3664 | <i>Leptospira interrogans</i>     | GCA_001010765.1_ASM101076v1_genomic.fna |
| 3665 | <i>Fusobacterium nucleatum</i>    | GCA_000400875.1_ASM40087v1_genomic.fna  |
| 3666 | <i>Bacillus anthracis</i>         | GCA_000022865.1_ASM2286v1_genomic.fna   |
| 3667 | <i>Shigella flexneri</i>          | GCA_000743955.1_ASM74395v1_genomic.fna  |
| 3668 | <i>Bifidobacterium longum</i>     | GCA_000166315.1_ASM16631v1_genomic.fna  |
| 3669 | <i>Histophilus somni</i>          | GCA_002162215.1_ASM216221v1_genomic.fna |

|      |                                    |                                         |
|------|------------------------------------|-----------------------------------------|
| 3670 | <i>Pseudomonas syringae</i>        | GCA_000648735.3_ASM64873v3_genomic.fna  |
| 3671 | <i>Vibrio vulnificus</i>           | GCA_000746665.1_ASM74666v1_genomic.fna  |
| 3672 | <i>Mycoplasma hyopneumoniae</i>    | GCA_000400855.1_ASM40085v1_genomic.fna  |
| 3673 | <i>Streptococcus suis</i>          | GCA_000168355.3_ASM16835v3_genomic.fna  |
| 3674 | <i>Acinetobacter baumannii</i>     | GCA_000069245.1_ASM6924v1_genomic.fna   |
| 3675 | <i>Streptococcus agalactiae</i>    | GCA_000302475.3_ASM30247v3_genomic.fna  |
| 3676 | <i>Pseudomonas aeruginosa</i>      | GCA_000226155.1_ASM22615v1_genomic.fna  |
| 3677 | <i>Bacillus licheniformis</i>      | GCA_002074075.1_ASM207407v1_genomic.fna |
| 3678 | <i>Bacteroides fragilis</i>        | GCA_001286525.1_BFBE1.1_genomic.fna     |
| 3679 | <i>Legionella pneumophila</i>      | GCA_000092625.1_ASM9262v1_genomic.fna   |
| 3680 | <i>Streptococcus thermophilus</i>  | GCA_000182875.1_ASM18287v1_genomic.fna  |
| 3681 | <i>Shigella sonnei</i>             | GCA_002142635.1_ASM214263v1_genomic.fna |
| 3682 | <i>Shewanella baltica</i>          | GCA_000021665.1_ASM2166v1_genomic.fna   |
| 3683 | <i>Lactobacillus reuteri</i>       | GCA_000410995.1_ASM41099v1_genomic.fna  |
| 3684 | <i>Bacillus pumilus</i>            | GCA_001191605.1_ASM119160v1_genomic.fna |
| 3685 | <i>Corynebacterium glutamicum</i>  | GCA_000404145.1_ASM40414v1_genomic.fna  |
| 3686 | <i>Thermus thermophilus</i>        | GCA_002355995.1_ASM235599v1_genomic.fna |
| 3687 | <i>Burkholderia cenocepacia</i>    | GCA_000236215.4_ASM23621v4_genomic.fna  |
| 3688 | <i>Mycoplasma genitalium</i>       | GCA_000292505.1_ASM29250v1_genomic.fna  |
| 3689 | <i>Chlamydia trachomatis</i>       | GCA_000026925.1_ASM2692v1_genomic.fna   |
| 3690 | <i>Burkholderia mallei</i>         | GCA_000755785.1_ASM75578v1_genomic.fna  |
| 3691 | <i>Ehrlichia chaffeensis</i>       | GCA_000632905.1_ASM63290v1_genomic.fna  |
| 3692 | <i>Bacillus thuringiensis</i>      | GCA_000190515.1_ASM19051v1_genomic.fna  |
| 3693 | <i>Burkholderia pseudomallei</i>   | GCA_000260515.1_ASM26051v1_genomic.fna  |
| 3694 | <i>Ralstonia solanacearum</i>      | GCA_001586135.1_ASM158613v1_genomic.fna |
| 3695 | <i>Rhodopseudomonas palustris</i>  | GCA_000195775.1_ASM19577v1_genomic.fna  |
| 3696 | <i>Streptococcus salivarius</i>    | GCA_000448685.2_ASM44868v2_genomic.fna  |
| 3697 | <i>Vibrio cholerae</i>             | GCA_000022585.1_ASM2258v1_genomic.fna   |
| 3698 | <i>Rhodobacter sphaeroides</i>     | GCA_001576595.1_ASM157659v1_genomic.fna |
| 3699 | <i>Yersinia pseudotuberculosis</i> | GCA_000750315.1_ASM75031v1_genomic.fna  |
| 3700 | <i>Francisella tularensis</i>      | GCA_000014605.1_ASM1460v1_genomic.fna   |
| 3701 | <i>Brucella abortus</i>            | GCA_000740135.1_ASM74013v1_genomic.fna  |
| 3702 | <i>Lactobacillus delbrueckii</i>   | GCA_001469775.1_ASM146977v1_genomic.fna |
| 3703 | <i>Mycoplasma capricolum</i>       | GCA_000953235.1_ILRI181.1_genomic.fna   |

|      |                                    |                                         |
|------|------------------------------------|-----------------------------------------|
| 3704 | <i>Xanthomonas citri</i>           | GCA_000961155.1_ASM96115v1_genomic.fna  |
| 3705 | <i>Campylobacter fetus</i>         | GCA_000759485.1_ASM75948v1_genomic.fna  |
| 3706 | <i>Xanthomonas oryzae</i>          | GCA_000948075.1_ASM94807v1_genomic.fna  |
| 3707 | <i>Clostridioides difficile</i>    | GCA_000953275.1_CD630DERM_genomic.fna   |
| 3708 | <i>Aeromonas salmonicida</i>       | GCA_002313065.1_ASM231306v1_genomic.fna |
| 3709 | <i>Coxiella burnetii</i>           | GCA_000019885.1_ASM1988v1_genomic.fna   |
| 3710 | <i>Lactobacillus casei</i>         | GCA_000309565.2_ASM30956v2_genomic.fna  |
| 3711 | <i>Bacillus subtilis</i>           | GCA_000227465.1_ASM22746v1_genomic.fna  |
| 3712 | <i>Rickettsia rickettsii</i>       | GCA_000283815.1_ASM28381v1_genomic.fna  |
| 3713 | <i>Lactobacillus helveticus</i>    | GCA_000422165.1_ASM42216v1_genomic.fna  |
| 3714 | <i>Vibrio parahaemolyticus</i>     | GCA_000568495.1_ASM56849v1_genomic.fna  |
| 3715 | <i>Methylobacterium extorquens</i> | GCA_001971665.1_ASM197166v1_genomic.fna |
| 3716 | <i>Lactobacillus fermentum</i>     | GCA_001742205.1_ASM174220v1_genomic.fna |
| 3717 | <i>Porphyromonas gingivalis</i>    | GCA_001274615.1_ASM127461v1_genomic.fna |
| 3718 | <i>Ureaplasma parvum</i>           | GCA_002205535.1_ASM220553v1_genomic.fna |
| 3719 | <i>Mycoplasma mycoides</i>         | GCA_000253075.1_ASM25307v1_genomic.fna  |
| 3720 | <i>Burkholderia thailandensis</i>  | GCA_000567945.1_ASM56794v1_genomic.fna  |
| 3721 | <i>Phaeobacter gallaeciensis</i>   | GCA_002381325.1_ASM238132v1_genomic.fna |
| 3722 | <i>Burkholderia multivorans</i>    | GCA_001718755.1_ASM171875v1_genomic.fna |
| 3723 | <i>Rickettsia prowazekii</i>       | GCA_000277205.1_ASM27720v1_genomic.fna  |
| 3724 | <i>Clostridium botulinum</i>       | GCA_000017025.1_ASM1702v1_genomic.fna   |
| 3725 | <i>Borrelia burgdorferi</i>        | GCA_000444465.1_ASM44446v1_genomic.fna  |
| 3726 | <i>Rhizobium leguminosarum</i>     | GCA_000023185.1_ASM2318v1_genomic.fna   |
| 3727 | <i>Clavibacter michiganensis</i>   | GCA_001280205.1_ASM128020v1_genomic.fna |
| 3728 | <i>Brucella canis</i>              | GCA_001715365.1_ASM171536v1_genomic.fna |
| 3729 | <i>Brucella suis</i>               | GCA_000600055.1_ASM60005v1_genomic.fna  |
| 3730 | <i>Enterococcus faecalis</i>       | GCA_000281195.1_ASM28119v1_genomic.fna  |
| 3731 | <i>Klebsiella pneumoniae</i>       | GCA_000220485.1_ASM22048v1_genomic.fna  |
| 3732 | <i>Rhizobium etli</i>              | GCA_001664265.1_ASM166426v1_genomic.fna |
| 3733 | <i>Bifidobacterium animalis</i>    | GCA_000092765.1_ASM9276v1_genomic.fna   |
| 3734 | <i>Chlamydia psittaci</i>          | GCA_000270425.1_ASM27042v1_genomic.fna  |
| 3735 | <i>Bacillus amyloliquefaciens</i>  | GCA_000242855.2_ASM24285v2_genomic.fna  |
| 3736 | <i>Neisseria gonorrhoeae</i>       | GCA_001047255.1_ASM104725v1_genomic.fna |
| 3737 | <i>Streptococcus mutans</i>        | GCA_000817065.1_ASM81706v1_genomic.fna  |

|      |                                     |                                         |
|------|-------------------------------------|-----------------------------------------|
| 3738 | <i>Enterococcus faecium</i>         | GCA_000737555.1_ASM73755v1_genomic.fna  |
| 3739 | <i>Bacillus mycoides</i>            | GCA_002104575.1_ASM210457v1_genomic.fna |
| 3740 | <i>Alteromonas macleodii</i>        | GCA_001562235.1_ASM156223v1_genomic.fna |
| 3741 | <i>Stenotrophomonas maltophilia</i> | GCA_001274595.1_ASM127459v1_genomic.fna |
| 3742 | <i>Bifidobacterium bifidum</i>      | GCA_001281345.1_ASM128134v1_genomic.fna |
| 3743 | <i>Streptococcus equi</i>           | GCA_000696505.1_ASM69650v1_genomic.fna  |
| 3744 | <i>Zymomonas mobilis</i>            | GCA_000277755.1_ASM27775v1_genomic.fna  |
| 3745 | <i>Haemophilus parasuis</i>         | GCA_002055565.1_ASM205556v1_genomic.fna |
| 3746 | <i>Acetobacter pasteurianus</i>     | GCA_000010885.1_ASM1088v1_genomic.fna   |
| 3747 | <i>Pasteurella multocida</i>        | GCA_000259545.1_ASM25954v1_genomic.fna  |
| 3748 | <i>Francisella philomiragia</i>     | GCA_000833295.1_ASM83329v1_genomic.fna  |
| 3749 | <i>Lactobacillus rhamnosus</i>      | GCA_000418475.1_ASM41847v1_genomic.fna  |
| 3750 | <i>Caulobacter vibrioides</i>       | GCA_002310375.2_ASM231037v2_genomic.fna |
| 3751 | <i>Brucella melitensis</i>          | GCA_000227645.1_ASM22764v1_genomic.fna  |
| 3752 | <i>Bacillus megaterium</i>          | GCA_000225265.1_ASM22526v1_genomic.fna  |
| 3753 | <i>Sinorhizobium meliloti</i>       | GCA_000304415.1_RM41_genomic.fna        |
| 3754 | <i>Bordetella bronchiseptica</i>    | GCA_001704355.1_ASM170435v1_genomic.fna |
| 3755 | <i>Haemophilus ducreyi</i>          | GCA_001647765.1_ASM164776v1_genomic.fna |
| 3756 | <i>Streptococcus gordonii</i>       | GCA_002386285.1_ASM238628v1_genomic.fna |
| 3757 | <i>Bordetella pertussis</i>         | GCA_000812165.1_ASM81216v1_genomic.fna  |
| 3758 | <i>Corynebacterium diphtheriae</i>  | GCA_000241915.1_ASM24191v1_genomic.fna  |
| 3759 | <i>Mycobacterium smegmatis</i>      | GCA_000767705.1_ASM76770v1_genomic.fna  |
| 3760 | <i>Mycoplasma pneumoniae</i>        | GCA_000319675.2_ASM31967v2_genomic.fna  |
| 3761 | <i>Thermotoga maritima</i>          | GCA_000978555.1_ASM97855v1_genomic.fna  |
| 3762 | <i>Yersinia enterocolitica</i>      | GCA_000834735.1_ASM83473v1_genomic.fna  |
| 3763 | <i>Dehalococcoides mccartyi</i>     | GCA_000025025.1_ASM2502v1_genomic.fna   |
| 3764 | <i>Chlamydia muridarum</i>          | GCA_000772145.1_ASM77214v1_genomic.fna  |
| 3765 | <i>Leuconostoc mesenteroides</i>    | GCA_001583825.1_ASM158382v1_genomic.fna |
| 3766 | <i>Lactobacillus plantarum</i>      | GCA_000392485.2_ASM39248v2_genomic.fna  |
| 3767 | <i>Chlamydia abortus</i>            | GCA_900002515.1_1BCEVAC_genomic.fna     |
| 3768 | <i>Lactobacillus acidophilus</i>    | GCA_002286215.1_ASM228621v1_genomic.fna |
| 3769 | <i>Mannheimia haemolytica</i>       | GCA_000422145.1_ASM42214v1_genomic.fna  |
| 3770 | <i>Pediococcus pentosaceus</i>      | GCA_002202155.1_ASM220215v1_genomic.fna |
| 3771 | <i>Lactobacillus brevis</i>         | GCA_002117325.1_ASM211732v1_genomic.fna |

|      |                                              |                                           |
|------|----------------------------------------------|-------------------------------------------|
| 3772 | <i>Serratia marcescens</i>                   | GCA_001022215.1_ASM102221v1_genomic.fna   |
| 3773 | <i>Moorella thermoacetica</i>                | GCA_001874605.1_ASM187460v1_genomic.fna   |
| 3774 | <i>Mycoplasma gallisepticum</i>              | GCA_000286675.1_ASM28667v1_genomic.fna    |
| 3775 | <i>Burkholderia vietnamiensis</i>            | GCA_001718915.1_ASM171891v1_genomic.fna   |
| 3776 | <i>Propionibacterium acnes</i>               | GCA_000231215.1_ASM23121v1_genomic.fna    |
| 3777 | <i>Campylobacter coli</i>                    | GCA_000583795.1_ASM58379v1_genomic.fna    |
| 3778 | <i>Mycoplasma bovis</i>                      | GCA_001043135.1_ASM104313v1_genomic.fna   |
| 3779 | <i>Campylobacter lari</i>                    | GCA_000816405.1_ASM81640v1_genomic.fna    |
| 3780 | <i>Proteus mirabilis</i>                     | GCA_002055685.1_ASM205568v1_genomic.fna   |
| 3781 | <i>Klebsiella oxytoca</i>                    | GCA_001548355.1_ASM154835v1_genomic.fna   |
| 3782 | <i>Clostridium beijerinckii</i>              | GCA_002003345.1_ASM200334v1_genomic.fna   |
| 3783 | <i>Cronobacter sakazakii</i>                 | GCA_001277275.1_ASM127727v1_genomic.fna   |
| 3784 | <i>Lactobacillus salivarius</i>              | GCA_001723525.1_ASM172352v1_genomic.fna   |
| 3785 | <i>Gluconobacter oxydans</i>                 | GCA_900175995.1_ASM90017599v1_genomic.fna |
| 3786 | <i>Enterobacter cloacae</i>                  | GCA_000512375.1_ASM51237v1_genomic.fna    |
| 3787 | <i>Moraxella catarrhalis</i>                 | GCA_002080125.1_ASM208012v1_genomic.fna   |
| 3788 | <i>Listeria ivanovii</i>                     | GCA_000763515.1_ASM76351v1_genomic.fna    |
| 3789 | <i>Bifidobacterium breve</i>                 | GCA_000568975.1_ASM56897v1_genomic.fna    |
| 3790 | <i>Mycobacterium abscessus</i>               | GCA_000758385.1_ASM75838v1_genomic.fna    |
| 3791 | <i>Bacillus coagulans</i>                    | GCA_001039495.1_ASM103949v1_genomic.fna   |
| 3792 | <i>Paenibacillus polymyxa</i>                | GCA_000597985.1_ASM59798v1_genomic.fna    |
| 3793 | <i>Aeromonas hydrophila</i>                  | GCA_000633175.1_ASM63317v1_genomic.fna    |
| 3794 | <i>Pseudomonas stutzeri</i>                  | GCA_000267545.1_ASM26754v1_genomic.fna    |
| 3795 | <i>Granulibacter bethesdensis</i>            | GCA_001889445.1_ASM188944v1_genomic.fna   |
| 3796 | <i>Burkholderia ubonensis</i>                | GCA_001718855.1_ASM171885v1_genomic.fna   |
| 3797 | <i>Flavobacterium psychrophilum</i>          | GCA_000767095.1_ASM76709v1_genomic.fna    |
| 3798 | <i>Clostridium butyricum</i>                 | GCA_001886875.1_ASM188687v1_genomic.fna   |
| 3799 | <i>Bdellovibrio bacteriovorus</i>            | GCA_000317895.1_ASM31789v1_genomic.fna    |
| 3800 | <i>Lactobacillus johnsonii</i>               | GCA_001714745.1_ASM171474v1_genomic.fna   |
| 3801 | <i>Lactobacillus sakei</i>                   | GCA_002370375.1_ASM237037v1_genomic.fna   |
| 3802 | <i>Paenibacillus larvae</i>                  | GCA_002082155.1_ASM208215v1_genomic.fna   |
| 3803 | <i>Mycobacterium intracellulare</i>          | GCA_002285695.1_ASM228569v1_genomic.fna   |
| 3804 | <i>Streptomyces albus</i>                    | GCA_001577385.1_ASM157738v1_genomic.fna   |
| 3805 | <i>Aggregatibacter actinomycetemcomitans</i> | GCA_001594245.1_ASM159424v1_genomic.fna   |



|      |                                           |                                          |
|------|-------------------------------------------|------------------------------------------|
| 3806 | <i>Serratia symbiotica</i>                | GCA_900016775.1_STsPazieg1.0_genomic.fna |
| 3807 | <i>Streptococcus intermedius</i>          | GCA_002356055.1_ASM235605v1_genomic.fna  |
| 3808 | <i>Mycoplasma hyorhinis</i>               | GCA_000496815.1_ASM49681v1_genomic.fna   |
| 3809 | <i>Gardnerella vaginalis</i>              | GCA_001953155.1_ASM195315v1_genomic.fna  |
| 3810 | <i>Lactobacillus paracasei</i>            | GCA_001191565.1_ASM119156v1_genomic.fna  |
| 3811 | <i>Bacillus atrophaeus</i>                | GCA_002688645.1_ASM268864v1_genomic.fna  |
| 3812 | <i>Klebsiella variicola</i>               | GCA_001989495.1_ASM198949v1_genomic.fna  |
| 3813 | <i>Achromobacter xylosoxidans</i>         | GCA_001558755.1_ASM155875v1_genomic.fna  |
| 3814 | <i>Vibrio alginolyticus</i>               | GCA_002119505.1_ASM211950v1_genomic.fna  |
| 3815 | <i>Pediococcus acidilactici</i>           | GCA_002174215.1_ASM217421v1_genomic.fna  |
| 3816 | <i>Corynebacterium pseudotuberculosis</i> | GCA_000221625.1_ASM22162v1_genomic.fna   |
| 3817 | <i>Acinetobacter pittii</i>               | GCA_002158945.1_ASM215894v1_genomic.fna  |
| 3818 | <i>Riemerella anatipestifer</i>           | GCA_000331695.1_ASM33169v1_genomic.fna   |
| 3819 | <i>Staphylococcus lugdunensis</i>         | GCA_002073395.1_ASM207339v1_genomic.fna  |
| 3820 | <i>Streptococcus anginosus</i>            | GCA_001412635.1_ASM141263v1_genomic.fna  |
| 3821 | <i>Pantoea ananatis</i>                   | GCA_001543055.1_ASM154305v1_genomic.fna  |
| 3822 | <i>Streptococcus gallolyticus</i>         | GCA_001477575.1_ASM147757v1_genomic.fna  |
| 3823 | <i>Taylorella equigenitalis</i>           | GCA_002288155.1_ASM228815v1_genomic.fna  |
| 3824 | <i>Ketogulonicigenium vulgare</i>         | GCA_001855295.1_ASM185529v1_genomic.fna  |
| 3825 | <i>Citrobacter freundii</i>               | GCA_001702455.1_ASM170245v1_genomic.fna  |
| 3826 | <i>Vibrio anguillarum</i>                 | GCA_002163795.1_ASM216379v1_genomic.fna  |
| 3827 | <i>Enterobacter hormaechei</i>            | GCA_000814205.1_ASM81420v1_genomic.fna   |
| 3828 | <i>Weissella cibaria</i>                  | GCA_002243305.1_ASM224330v1_genomic.fna  |
| 3829 | <i>Klebsiella aerogenes</i>               | GCA_001571545.2_ASM157154v2_genomic.fna  |
| 3830 | <i>Staphylococcus pseudintermedius</i>    | GCA_001685665.2_ASM168566v2_genomic.fna  |
| 3831 | <i>Corynebacterium ulcerans</i>           | GCA_000767415.1_ASM76741v1_genomic.fna   |
| 3832 | <i>Burkholderia cepacia</i>               | GCA_000974835.2_ASM97483v2_genomic.fna   |
| 3833 | <i>Lactobacillus curvatus</i>             | GCA_002224505.1_ASM222450v1_genomic.fna  |
| 3834 | <i>Pediococcus damnosus</i>               | GCA_001611155.1_ASM161115v1_genomic.fna  |
| 3835 | <i>Prevotella intermedia</i>              | GCA_002355195.1_ASM235519v1_genomic.fna  |
| 3836 | <i>Clostridium pasteurianum</i>           | GCA_001856645.1_ASM185664v1_genomic.fna  |
| 3837 | <i>Vibrio campbellii</i>                  | GCA_002142655.1_ASM214265v1_genomic.fna  |
| 3838 | <i>Rickettsia japonica</i>                | GCA_002357155.1_ASM235715v1_genomic.fna  |
| 3839 | <i>Moraxella bovoculi</i>                 | GCA_000988705.1_ASM98870v1_genomic.fna   |

|      |                                               |                                         |
|------|-----------------------------------------------|-----------------------------------------|
| 3840 | <i>Flavobacterium columnare</i>               | GCA_001936395.1_ASM193639v1_genomic.fna |
| 3841 | <i>Piscirickettsia salmonis</i>               | GCA_001534725.1_ASM153472v1_genomic.fna |
| 3842 | <i>Francisella noatunensis</i>                | GCA_001042565.2_ASM104256v2_genomic.fna |
| 3843 | <i>Elizabethkingia anophelis</i>              | GCA_001618465.2_ASM161846v2_genomic.fna |
| 3844 | <i>Rhizobium phaseoli</i>                     | GCA_001664185.1_ASM166418v1_genomic.fna |
| 3845 | <i>Xanthomonas fragariae</i>                  | GCA_900183995.1_PD5205.1_genomic.fna    |
| 3846 | <i>Pseudomonas chlororaphis</i>               | GCA_001602135.1_ASM160213v1_genomic.fna |
| 3847 | <i>Serratia plymuthica</i>                    | GCA_001663115.1_ASM166311v1_genomic.fna |
| 3848 | <i>Acidipropionibacterium acidipropionici</i> | GCA_001975205.1_ASM197520v1_genomic.fna |
| 3849 | <i>Bordetella holmesii</i>                    | GCA_001704215.1_ASM170421v1_genomic.fna |
| 3850 | <i>Bacillus safensis</i>                      | GCA_002077215.1_ASM207721v1_genomic.fna |
| 3851 | <i>Vibrio natriegens</i>                      | GCA_001680085.1_ASM168008v1_genomic.fna |
| 3852 | <i>Raoultella ornithinolytica</i>             | GCA_001866535.1_ASM186653v1_genomic.fna |
| 3853 | <i>Clostridium saccharobutylicum</i>          | GCA_002003385.1_ASM200338v1_genomic.fna |
| 3854 | <i>Pandoraea pnomenusa</i>                    | GCA_001636275.1_ASM163627v1_genomic.fna |
| 3855 | <i>Bacillus velezensis</i>                    | GCA_000341875.1_ASM34187v1_genomic.fna  |
| 3856 | <i>Klebsiella michiganensis</i>               | GCA_000963575.1_ASM96357v1_genomic.fna  |
| 3857 | <i>Staphylococcus schleiferi</i>              | GCA_001548255.1_ASM154825v1_genomic.fna |
| 3858 | <i>Oblitimonas alkaliphila</i>                | GCA_001267275.1_ASM126727v1_genomic.fna |
| 3859 | <i>Mycobacterium chimaera</i>                 | GCA_002219285.1_ASM221928v1_genomic.fna |
| 3860 | <i>Alteromonas mediterranea</i>               | GCA_000439555.1_ASM43955v1_genomic.fna  |
| 3861 | <i>Lactobacillus backii</i>                   | GCA_001663755.1_ASM166375v1_genomic.fna |
| 3862 | <i>Campylobacter pinnipediorum</i>            | GCA_002022005.1_ASM202200v1_genomic.fna |
| 3863 | <i>Alteromonas mediterranea</i>               | GCA_000439575.1_ASM43957v1_genomic.fna  |
| 3864 | <i>Mycobacterium chimaera</i>                 | GCA_002240155.1_ASM224015v1_genomic.fna |
| 3865 | <i>Oblitimonas alkaliphila</i>                | GCA_001267295.1_ASM126729v1_genomic.fna |
| 3866 | <i>Klebsiella michiganensis</i>               | GCA_002216835.1_ASM221683v1_genomic.fna |
| 3867 | <i>Bacillus velezensis</i>                    | GCA_000455565.1_ucmb5033v1_genomic.fna  |
| 3868 | <i>Raoultella ornithinolytica</i>             | GCA_002214825.1_ASM221482v1_genomic.fna |
| 3869 | <i>Serratia plymuthica</i>                    | GCA_001663135.1_ASM166313v1_genomic.fna |
| 3870 | <i>Pseudomonas chlororaphis</i>               | GCA_002355875.1_ASM235587v1_genomic.fna |
| 3871 | <i>Rhizobium phaseoli</i>                     | GCA_001664205.1_ASM166420v1_genomic.fna |
| 3872 | <i>Elizabethkingia anophelis</i>              | GCA_001618505.2_ASM161850v2_genomic.fna |
| 3873 | <i>Francisella noatunensis</i>                | GCA_001190905.2_ASM119090v2_genomic.fna |

|      |                                              |                                         |
|------|----------------------------------------------|-----------------------------------------|
| 3874 | <i>Piscirickettsia salmonis</i>              | GCA_001746795.1_ASM174679v1_genomic.fna |
| 3875 | <i>Moraxella bovoculi</i>                    | GCA_000988745.1_ASM98874v1_genomic.fna  |
| 3876 | <i>Rickettsia japonica</i>                   | GCA_002357175.1_ASM235717v1_genomic.fna |
| 3877 | <i>Vibrio campbellii</i>                     | GCA_002163755.1_ASM216375v1_genomic.fna |
| 3878 | <i>Clostridium pasteurianum</i>              | GCA_001856695.1_ASM185669v1_genomic.fna |
| 3879 | <i>Burkholderia cepacia</i>                  | GCA_001718395.1_ASM171839v1_genomic.fna |
| 3880 | <i>Corynebacterium ulcerans</i>              | GCA_000767645.1_ASM76764v1_genomic.fna  |
| 3881 | <i>Klebsiella aerogenes</i>                  | GCA_001593585.1_ASM159358v1_genomic.fna |
| 3882 | <i>Vibrio anguillarum</i>                    | GCA_002211505.1_ASM221150v1_genomic.fna |
| 3883 | <i>Enterobacter hormaechei</i>               | GCA_000814225.1_ASM81422v1_genomic.fna  |
| 3884 | <i>Citrobacter freundii</i>                  | GCA_001718055.1_ASM171805v1_genomic.fna |
| 3885 | <i>Taylorella equigenitalis</i>              | GCA_002288205.1_ASM228820v1_genomic.fna |
| 3886 | <i>Pantoea ananatis</i>                      | GCA_002224585.1_ASM222458v1_genomic.fna |
| 3887 | <i>Streptococcus anginosus</i>               | GCA_001697145.1_ASM169714v1_genomic.fna |
| 3888 | <i>Staphylococcus lugdunensis</i>            | GCA_002250095.2_ASM225009v2_genomic.fna |
| 3889 | <i>Riemerella anatipestifer</i>              | GCA_000734055.1_ASM73405v1_genomic.fna  |
| 3890 | <i>Corynebacterium pseudotuberculosis</i>    | GCA_000227175.1_ASM22717v1_genomic.fna  |
| 3891 | <i>Vibrio alginolyticus</i>                  | GCA_002119525.1_ASM211952v1_genomic.fna |
| 3892 | <i>Klebsiella variicola</i>                  | GCA_001989515.1_ASM198951v1_genomic.fna |
| 3893 | <i>Lactobacillus paracasei</i>               | GCA_001244395.1_ASM124439v1_genomic.fna |
| 3894 | <i>Mycoplasma hyorhinis</i>                  | GCA_001705605.1_ASM170560v1_genomic.fna |
| 3895 | <i>Aggregatibacter actinomycetemcomitans</i> | GCA_001690155.1_ASM169015v1_genomic.fna |
| 3896 | <i>Streptomyces albus</i>                    | GCA_001753425.1_ASM175342v1_genomic.fna |
| 3897 | <i>Bdellovibrio bacteriovorus</i>            | GCA_000691605.1_ASM69160v1_genomic.fna  |
| 3898 | <i>Lactobacillus johnsonii</i>               | GCA_002176835.1_ASM217683v1_genomic.fna |
| 3899 | <i>Flavobacterium psychrophilum</i>          | GCA_000831185.1_ASM83118v1_genomic.fna  |
| 3900 | <i>Burkholderia ubonensis</i>                | GCA_001718975.1_ASM171897v1_genomic.fna |
| 3901 | <i>Granulibacter bethesdensis</i>            | GCA_001889465.1_ASM188946v1_genomic.fna |
| 3902 | <i>Pseudomonas stutzeri</i>                  | GCA_000279165.1_ASM27916v1_genomic.fna  |
| 3903 | <i>Aeromonas hydrophila</i>                  | GCA_000635955.1_ASM63595v1_genomic.fna  |
| 3904 | <i>Paenibacillus polymyxa</i>                | GCA_000819665.1_ASM81966v1_genomic.fna  |
| 3905 | <i>Bacillus coagulans</i>                    | GCA_001870065.1_ASM187006v1_genomic.fna |
| 3906 | <i>Mycobacterium abscessus</i>               | GCA_000770175.1_ASM77017v1_genomic.fna  |
| 3907 | <i>Bifidobacterium breve</i>                 | GCA_000569015.1_ASM56901v1_genomic.fna  |

|      |                                     |                                         |
|------|-------------------------------------|-----------------------------------------|
| 3908 | <i>Listeria ivanovii</i>            | GCA_900187025.1_49923_F01_genomic.fna   |
| 3909 | <i>Enterobacter cloacae</i>         | GCA_000724505.1_ASM72450v1_genomic.fna  |
| 3910 | <i>Lactobacillus salivarius</i>     | GCA_002162055.1_ASM216205v1_genomic.fna |
| 3911 | <i>Klebsiella oxytoca</i>           | GCA_001870185.1_ASM187018v1_genomic.fna |
| 3912 | <i>Proteus mirabilis</i>            | GCA_002180115.1_ASM218011v1_genomic.fna |
| 3913 | <i>Campylobacter lari</i>           | GCA_000816425.1_ASM81642v1_genomic.fna  |
| 3914 | <i>Mycoplasma bovis</i>             | GCA_001611865.1_ASM161186v1_genomic.fna |
| 3915 | <i>Campylobacter coli</i>           | GCA_000954195.1_ASM95419v1_genomic.fna  |
| 3916 | <i>Propionibacterium acnes</i>      | GCA_000240015.1_ASM24001v1_genomic.fna  |
| 3917 | <i>Mycoplasma gallisepticum</i>     | GCA_000286695.1_ASM28669v1_genomic.fna  |
| 3918 | <i>Lactobacillus brevis</i>         | GCA_002117345.1_ASM211734v1_genomic.fna |
| 3919 | <i>Mannheimia haemolytica</i>       | GCA_000427275.1_ASM42727v1_genomic.fna  |
| 3920 | <i>Lactobacillus plantarum</i>      | GCA_000412205.1_ASM41220v1_genomic.fna  |
| 3921 | <i>Serratia marcescens</i>          | GCA_001280365.1_ASM128036v1_genomic.fna |
| 3922 | <i>Leuconostoc mesenteroides</i>    | GCA_001886915.1_ASM188691v1_genomic.fna |
| 3923 | <i>Chlamydia muridarum</i>          | GCA_000830945.1_ASM83094v1_genomic.fna  |
| 3924 | <i>Dehalococcoides mccartyi</i>     | GCA_000025585.1_ASM2558v1_genomic.fna   |
| 3925 | <i>Yersinia enterocolitica</i>      | GCA_000968115.1_ASM96811v1_genomic.fna  |
| 3926 | <i>Thermotoga maritima</i>          | GCA_000978575.1_ASM97857v1_genomic.fna  |
| 3927 | <i>Mycobacterium smegmatis</i>      | GCA_001457595.1_NCTC8159_genomic.fna    |
| 3928 | <i>Mycoplasma pneumoniae</i>        | GCA_000331085.2_ASM33108v2_genomic.fna  |
| 3929 | <i>Corynebacterium diphtheriae</i>  | GCA_000241935.1_ASM24193v1_genomic.fna  |
| 3930 | <i>Haemophilus ducreyi</i>          | GCA_001647795.1_ASM164779v1_genomic.fna |
| 3931 | <i>Bordetella pertussis</i>         | GCA_001013565.1_BPD420_genomic.fna      |
| 3932 | <i>Sinorhizobium meliloti</i>       | GCA_000320385.2_ASM32038v2_genomic.fna  |
| 3933 | <i>Bacillus megaterium</i>          | GCA_001050455.1_ASM105045v1_genomic.fna |
| 3934 | <i>Caulobacter vibrioides</i>       | GCA_002310455.1_ASM231045v1_genomic.fna |
| 3935 | <i>Brucella melitensis</i>          | GCA_000740355.1_ASM74035v1_genomic.fna  |
| 3936 | <i>Lactobacillus rhamnosus</i>      | GCA_000418495.1_ASM41849v1_genomic.fna  |
| 3937 | <i>Francisella philomiragia</i>     | GCA_000833315.1_ASM83331v1_genomic.fna  |
| 3938 | <i>Pasteurella multocida</i>        | GCA_000512395.1_ASM51239v1_genomic.fna  |
| 3939 | <i>Acetobacter pasteurianus</i>     | GCA_000010905.1_ASM1090v1_genomic.fna   |
| 3940 | <i>Zymomonas mobilis</i>            | GCA_000498655.1_ASM49865v1_genomic.fna  |
| 3941 | <i>Stenotrophomonas maltophilia</i> | GCA_001274655.1_ASM127465v1_genomic.fna |

|      |                                   |                                         |
|------|-----------------------------------|-----------------------------------------|
| 3942 | <i>Alteromonas macleodii</i>      | GCA_001578515.1_ASM157851v1_genomic.fna |
| 3943 | <i>Enterococcus faecium</i>       | GCA_001298485.1_ASM129848v1_genomic.fna |
| 3944 | <i>Streptococcus mutans</i>       | GCA_001558215.1_ASM155821v1_genomic.fna |
| 3945 | <i>Neisseria gonorrhoeae</i>      | GCA_001047275.1_ASM104727v1_genomic.fna |
| 3946 | <i>Bacillus amyloliquefaciens</i> | GCA_000262385.1_ASM26238v1_genomic.fna  |
| 3947 | <i>Chlamydia psittaci</i>         | GCA_000270445.1_ASM27044v1_genomic.fna  |
| 3948 | <i>Bifidobacterium animalis</i>   | GCA_000220885.1_ASM22088v1_genomic.fna  |
| 3949 | <i>Rhizobium etli</i>             | GCA_001908375.1_ASM190837v1_genomic.fna |
| 3950 | <i>Enterococcus faecalis</i>      | GCA_000317915.1_ASM31791v1_genomic.fna  |
| 3951 | <i>Brucella suis</i>              | GCA_000698245.1_ASM69824v1_genomic.fna  |
| 3952 | <i>Brucella canis</i>             | GCA_001715405.1_ASM171540v1_genomic.fna |
| 3953 | <i>Borrelia burgdorferi</i>       | GCA_002151465.1_ASM215146v1_genomic.fna |
| 3954 | <i>Rhizobium leguminosarum</i>    | GCA_000520875.1_ASM52087v1_genomic.fna  |
| 3955 | <i>Klebsiella pneumoniae</i>      | GCA_000281435.2_ASM28143v2_genomic.fna  |
| 3956 | <i>Clostridium botulinum</i>      | GCA_000017065.1_ASM1706v1_genomic.fna   |
| 3957 | <i>Rickettsia prowazekii</i>      | GCA_000277245.1_ASM27724v1_genomic.fna  |
| 3958 | <i>Burkholderia multivorans</i>   | GCA_001718995.1_ASM171899v1_genomic.fna |
| 3959 | <i>Phaeobacter gallaeciensis</i>  | GCA_002381365.1_ASM238136v1_genomic.fna |
| 3960 | <i>Burkholderia thailandensis</i> | GCA_000706745.1_ASM70674v1_genomic.fna  |
| 3961 | <i>Ureaplasma parvum</i>          | GCA_002205595.1_ASM220559v1_genomic.fna |
| 3962 | <i>Mycoplasma mycoides</i>        | GCA_000800785.1_ASM80078v1_genomic.fna  |
| 3963 | <i>Porphyromonas gingivalis</i>   | GCA_001314265.1_ASM131426v1_genomic.fna |
| 3964 | <i>Lactobacillus fermentum</i>    | GCA_001941785.1_ASM194178v1_genomic.fna |
| 3965 | <i>Vibrio parahaemolyticus</i>    | GCA_001244315.1_ASM124431v1_genomic.fna |
| 3966 | <i>Rickettsia rickettsii</i>      | GCA_000283935.1_ASM28393v1_genomic.fna  |
| 3967 | <i>Lactobacillus helveticus</i>   | GCA_000525715.1_ASM52571v1_genomic.fna  |
| 3968 | <i>Bacillus subtilis</i>          | GCA_000227485.1_ASM22748v1_genomic.fna  |
| 3969 | <i>Lactobacillus casei</i>        | GCA_000318035.1_ASM31803v1_genomic.fna  |
| 3970 | <i>Coxiella burnetii</i>          | GCA_000168875.3_ASM16887v3_genomic.fna  |
| 3971 | <i>Clostridioides difficile</i>   | GCA_001577795.1_ASM157779v1_genomic.fna |
| 3972 | <i>Xanthomonas oryzae</i>         | GCA_001021915.1_ASM102191v1_genomic.fna |
| 3973 | <i>Campylobacter fetus</i>        | GCA_000759515.1_ASM75951v1_genomic.fna  |
| 3974 | <i>Xanthomonas citri</i>          | GCA_000961175.1_ASM96117v1_genomic.fna  |
| 3975 | <i>Mycoplasma capricolum</i>      | GCA_000953375.1_F38.1_genomic.fna       |

|      |                                    |                                         |
|------|------------------------------------|-----------------------------------------|
| 3976 | <i>Lactobacillus delbrueckii</i>   | GCA_001888905.1_ASM188890v1_genomic.fna |
| 3977 | <i>Brucella abortus</i>            | GCA_000740155.1_ASM74015v1_genomic.fna  |
| 3978 | <i>Francisella tularensis</i>      | GCA_000014645.1_ASM1464v1_genomic.fna   |
| 3979 | <i>Rhodobacter sphaeroides</i>     | GCA_001685625.1_ASM168562v1_genomic.fna |
| 3980 | <i>Yersinia pseudotuberculosis</i> | GCA_000834295.1_ASM83429v1_genomic.fna  |
| 3981 | <i>Streptococcus salivarius</i>    | GCA_001543085.1_ASM154308v1_genomic.fna |
| 3982 | <i>Vibrio cholerae</i>             | GCA_000166455.2_ASM16645v2_genomic.fna  |
| 3983 | <i>Ralstonia solanacearum</i>      | GCA_001587135.1_ASM158713v1_genomic.fna |
| 3984 | <i>Burkholderia pseudomallei</i>   | GCA_000294635.1_ASM29463v1_genomic.fna  |
| 3985 | <i>Bacillus thuringiensis</i>      | GCA_000193355.1_ASM19335v1_genomic.fna  |
| 3986 | <i>Ehrlichia chaffeensis</i>       | GCA_000632925.1_ASM63292v1_genomic.fna  |
| 3987 | <i>Burkholderia mallei</i>         | GCA_000755845.1_ASM75584v1_genomic.fna  |
| 3988 | <i>Burkholderia cenocepacia</i>    | GCA_000755725.1_ASM75572v1_genomic.fna  |
| 3989 | <i>Chlamydia trachomatis</i>       | GCA_000068525.2_ASM6852v2_genomic.fna   |
| 3990 | <i>Corynebacterium glutamicum</i>  | GCA_000404185.1_ASM40418v1_genomic.fna  |
| 3991 | <i>Bacillus pumilus</i>            | GCA_001431145.1_ASM143114v1_genomic.fna |
| 3992 | <i>Shewanella baltica</i>          | GCA_000147735.3_ASM14773v3_genomic.fna  |
| 3993 | <i>Lactobacillus reuteri</i>       | GCA_000439275.1_ASM43927v1_genomic.fna  |
| 3994 | <i>Shigella sonnei</i>             | GCA_002150905.1_ASM215090v1_genomic.fna |
| 3995 | <i>Streptococcus thermophilus</i>  | GCA_000262675.1_ASM26267v1_genomic.fna  |
| 3996 | <i>Legionella pneumophila</i>      | GCA_000239175.1_ASM23917v1_genomic.fna  |
| 3997 | <i>Bacteroides fragilis</i>        | GCA_001682215.1_ASM168221v1_genomic.fna |
| 3998 | <i>Bacillus licheniformis</i>      | GCA_002074095.1_ASM207409v1_genomic.fna |
| 3999 | <i>Pseudomonas aeruginosa</i>      | GCA_000271365.1_ASM27136v1_genomic.fna  |
| 4000 | <i>Streptococcus agalactiae</i>    | GCA_000427035.1_09mas018883_genomic.fna |
| 4001 | <i>Acinetobacter baumannii</i>     | GCA_000186665.4_ASM18666v4_genomic.fna  |
| 4002 | <i>Streptococcus suis</i>          | GCA_000186405.1_ASM18640v1_genomic.fna  |
| 4003 | <i>Mycoplasma hyopneumoniae</i>    | GCA_000427215.1_ASM42721v1_genomic.fna  |
| 4004 | <i>Vibrio vulnificus</i>           | GCA_001433435.1_ASM143343v1_genomic.fna |
| 4005 | <i>Histophilus somni</i>           | GCA_002162235.1_ASM216223v1_genomic.fna |
| 4006 | <i>Pseudomonas syringae</i>        | GCA_000988395.1_ASM98839v1_genomic.fna  |
| 4007 | <i>Bifidobacterium longum</i>      | GCA_000196555.1_ASM19655v1_genomic.fna  |
| 4008 | <i>Shigella flexneri</i>           | GCA_000743995.1_ASM74399v1_genomic.fna  |
| 4009 | <i>Leptospira interrogans</i>      | GCA_001047635.1_ASM104763v1_genomic.fna |

|      |                                   |                                         |
|------|-----------------------------------|-----------------------------------------|
| 4010 | <i>Fusobacterium nucleatum</i>    | GCA_001296085.1_ASM129608v1_genomic.fna |
| 4011 | <i>Bacillus anthracis</i>         | GCA_000258885.1_ASM25888v1_genomic.fna  |
| 4012 | <i>Streptococcus pneumoniae</i>   | GCA_000019005.1_ASM1900v1_genomic.fna   |
| 4013 | <i>Streptococcus pyogenes</i>     | GCA_000011665.1_ASM1166v1_genomic.fna   |
| 4014 | <i>Xylella fastidiosa</i>         | GCA_000698805.1_ASM69880v1_genomic.fna  |
| 4015 | <i>Pseudomonas putida</i>         | GCA_000183645.1_ASM18364v1_genomic.fna  |
| 4016 | <i>Neisseria meningitidis</i>     | GCA_000083565.1_ASM8356v1_genomic.fna   |
| 4017 | <i>Buchnera aphidicola</i>        | GCA_000217635.1_ASM21763v1_genomic.fna  |
| 4018 | <i>Chlamydia pneumoniae</i>       | GCA_001007025.1_Wien1_genomic.fna       |
| 4019 | <i>Helicobacter pylori</i>        | GCA_000021165.1_ASM2116v1_genomic.fna   |
| 4020 | <i>Haemophilus influenzae</i>     | GCA_000200475.1_ASM20047v1_genomic.fna  |
| 4021 | <i>Prochlorococcus marinus</i>    | GCA_000015645.1_ASM1564v1_genomic.fna   |
| 4022 | <i>Mycobacterium tuberculosis</i> | GCA_000153685.2_ASM15368v2_genomic.fna  |
| 4023 | <i>Mycobacterium avium</i>        | GCA_000770235.1_ASM77023v1_genomic.fna  |
| 4024 | <i>Mycobacterium bovis</i>        | GCA_000338715.2_ASM33871v2_genomic.fna  |
| 4025 | <i>Clostridium perfringens</i>    | GCA_001579785.1_ASM157978v1_genomic.fna |
| 4026 | <i>Listeria monocytogenes</i>     | GCA_000093125.2_ASM9312v2_genomic.fna   |
| 4027 | <i>Bacillus cereus</i>            | GCA_000021225.1_ASM2122v1_genomic.fna   |
| 4028 | <i>Lactococcus lactis</i>         | GCA_000192705.1_ASM19270v1_genomic.fna  |
| 4029 | <i>Staphylococcus epidermidis</i> | GCA_002085695.1_ASM208569v1_genomic.fna |
| 4030 | <i>Staphylococcus aureus</i>      | GCA_000010445.1_ASM1044v1_genomic.fna   |
| 4031 | <i>Yersinia pestis</i>            | GCA_000016445.1_ASM1644v1_genomic.fna   |
| 4032 | <i>Campylobacter jejuni</i>       | GCA_000017905.1_ASM1790v1_genomic.fna   |
| 4033 | <i>Xanthomonas campestris</i>     | GCA_001186415.1_ASM118641v1_genomic.fna |
| 4034 | <i>Pseudomonas fluorescens</i>    | GCA_000730425.1_ASM73042v1_genomic.fna  |
| 4035 | <i>Salmonella enterica</i>        | GCA_000009525.1_ASM952v1_genomic.fna    |
| 4036 | <i>Salmonella enterica</i>        | GCA_000011885.1_ASM1188v1_genomic.fna   |
| 4037 | <i>Campylobacter jejuni</i>       | GCA_000025425.1_ASM2542v1_genomic.fna   |
| 4038 | <i>Xanthomonas campestris</i>     | GCA_001186465.1_ASM118646v1_genomic.fna |
| 4039 | <i>Pseudomonas fluorescens</i>    | GCA_000934565.1_ASM93456v1_genomic.fna  |
| 4040 | <i>Yersinia pestis</i>            | GCA_000018805.1_ASM1880v1_genomic.fna   |
| 4041 | <i>Staphylococcus aureus</i>      | GCA_000010465.1_ASM1046v1_genomic.fna   |
| 4042 | <i>Lactococcus lactis</i>         | GCA_000236475.1_ASM23647v1_genomic.fna  |
| 4043 | <i>Staphylococcus epidermidis</i> | GCA_002215535.1_ASM221553v1_genomic.fna |

|      |                                   |                                         |
|------|-----------------------------------|-----------------------------------------|
| 4044 | <i>Bacillus cereus</i>            | GCA_000021305.1_ASM2130v1_genomic.fna   |
| 4045 | <i>Clostridium perfringens</i>    | GCA_001854085.1_ASM185408v1_genomic.fna |
| 4046 | <i>Listeria monocytogenes</i>     | GCA_000168575.2_ASM16857v2_genomic.fna  |
| 4047 | <i>Mycobacterium avium</i>        | GCA_000829075.1_ASM82907v1_genomic.fna  |
| 4048 | <i>Mycobacterium bovis</i>        | GCA_000758245.1_ASM75824v1_genomic.fna  |
| 4049 | <i>Mycobacterium tuberculosis</i> | GCA_000154585.2_ASM15458v2_genomic.fna  |
| 4050 | <i>Haemophilus influenzae</i>     | GCA_000210875.1_ASM21087v1_genomic.fna  |
| 4051 | <i>Prochlorococcus marinus</i>    | GCA_000015665.1_ASM1566v1_genomic.fna   |
| 4052 | <i>Escherichia coli</i>           | GCA_000007445.1_ASM744v1_genomic.fna    |
| 4053 | <i>Helicobacter pylori</i>        | GCA_000021465.1_ASM2146v1_genomic.fna   |
| 4054 | <i>Chlamydia pneumoniae</i>       | GCA_001007045.1_K7_genomic.fna          |
| 4055 | <i>Buchnera aphidicola</i>        | GCA_000225445.1_ASM22544v1_genomic.fna  |
| 4056 | <i>Neisseria meningitidis</i>     | GCA_000152165.1_ASM15216v1_genomic.fna  |
| 4057 | <i>Pseudomonas putida</i>         | GCA_000219705.1_ASM21970v1_genomic.fna  |
| 4058 | <i>Xylella fastidiosa</i>         | GCA_000698825.1_ASM69882v1_genomic.fna  |
| 4059 | <i>Streptococcus pyogenes</i>     | GCA_000011765.2_ASM1176v2_genomic.fna   |
| 4060 | <i>Streptococcus pneumoniae</i>   | GCA_000019025.1_ASM1902v1_genomic.fna   |
| 4061 | <i>Fusobacterium nucleatum</i>    | GCA_001296145.1_ASM129614v1_genomic.fna |
| 4062 | <i>Leptospira interrogans</i>     | GCA_001047655.1_ASM104765v1_genomic.fna |
| 4063 | <i>Shigella flexneri</i>          | GCA_000953035.1_NCTC1_genomic.fna       |
| 4064 | <i>Bacillus anthracis</i>         | GCA_000512835.2_ASM51283v2_genomic.fna  |
| 4065 | <i>Bifidobacterium longum</i>     | GCA_000196575.1_ASM19657v1_genomic.fna  |
| 4066 | <i>Pseudomonas syringae</i>       | GCA_000988485.1_ASM98848v1_genomic.fna  |
| 4067 | <i>Histophilus somni</i>          | GCA_002162255.1_ASM216225v1_genomic.fna |
| 4068 | <i>Vibrio vulnificus</i>          | GCA_001558515.1_ASM155851v1_genomic.fna |
| 4069 | <i>Mycoplasma hyopneumoniae</i>   | GCA_002257505.1_ASM225750v1_genomic.fna |
| 4070 | <i>Streptococcus suis</i>         | GCA_000204625.1_ASM20462v1_genomic.fna  |
| 4071 | <i>Acinetobacter baumannii</i>    | GCA_000187205.4_ASM18720v4_genomic.fna  |
| 4072 | <i>Streptococcus agalactiae</i>   | GCA_000427075.1_ILRI005_genomic.fna     |
| 4073 | <i>Pseudomonas aeruginosa</i>     | GCA_000271985.2_ASM27198v2_genomic.fna  |
| 4074 | <i>Bacillus licheniformis</i>     | GCA_002074115.1_ASM207411v1_genomic.fna |
| 4075 | <i>Legionella pneumophila</i>     | GCA_000306845.1_ASM30684v1_genomic.fna  |
| 4076 | <i>Streptococcus thermophilus</i> | GCA_000698885.1_ASM69888v1_genomic.fna  |
| 4077 | <i>Lactobacillus reuteri</i>      | GCA_001046835.1_ASM104683v1_genomic.fna |



|      |                                    |                                         |
|------|------------------------------------|-----------------------------------------|
| 4078 | <i>Shewanella baltica</i>          | GCA_000215895.1_ASM21589v1_genomic.fna  |
| 4079 | <i>Bacillus pumilus</i>            | GCA_001431785.1_ASM143178v1_genomic.fna |
| 4080 | <i>Corynebacterium glutamicum</i>  | GCA_000445015.1_ASM44501v1_genomic.fna  |
| 4081 | <i>Chlamydia trachomatis</i>       | GCA_000092485.1_ASM9248v1_genomic.fna   |
| 4082 | <i>Burkholderia cenocepacia</i>    | GCA_000764955.1_ASM76495v1_genomic.fna  |
| 4083 | <i>Shigella sonnei</i>             | GCA_002224605.1_ASM222460v1_genomic.fna |
| 4084 | <i>Burkholderia mallei</i>         | GCA_000755865.1_ASM75586v1_genomic.fna  |
| 4085 | <i>Burkholderia pseudomallei</i>   | GCA_000439695.1_ASM43969v1_genomic.fna  |
| 4086 | <i>Ehrlichia chaffeensis</i>       | GCA_000632945.1_ASM63294v1_genomic.fna  |
| 4087 | <i>Bacillus thuringiensis</i>      | GCA_000292455.1_ASM29245v1_genomic.fna  |
| 4088 | <i>Ralstonia solanacearum</i>      | GCA_001587155.1_ASM158715v1_genomic.fna |
| 4089 | <i>Vibrio cholerae</i>             | GCA_000195065.1_ASM19506v1_genomic.fna  |
| 4090 | <i>Rhodopseudomonas palustris</i>  | GCA_000013685.1_ASM1368v1_genomic.fna   |
| 4091 | <i>Streptococcus salivarius</i>    | GCA_002073835.1_ASM207383v1_genomic.fna |
| 4092 | <i>Rhodobacter sphaeroides</i>     | GCA_002706325.1_ASM270632v1_genomic.fna |
| 4093 | <i>Yersinia pseudotuberculosis</i> | GCA_000834355.1_ASM83435v1_genomic.fna  |
| 4094 | <i>Francisella tularensis</i>      | GCA_000016105.1_ASM1610v1_genomic.fna   |
| 4095 | <i>Brucella abortus</i>            | GCA_000740175.1_ASM74017v1_genomic.fna  |
| 4096 | <i>Lactobacillus delbrueckii</i>   | GCA_001888925.1_ASM188892v1_genomic.fna |
| 4097 | <i>Mycoplasma capricolum</i>       | GCA_002009215.1_ASM200921v1_genomic.fna |
| 4098 | <i>Xanthomonas citri</i>           | GCA_000961195.1_ASM96119v1_genomic.fna  |
| 4099 | <i>Campylobacter fetus</i>         | GCA_000814265.1_ASM81426v1_genomic.fna  |
| 4100 | <i>Xanthomonas oryzae</i>          | GCA_001042735.1_ASM104273v1_genomic.fna |
| 4101 | <i>Clostridioides difficile</i>    | GCA_002007885.1_ASM200788v1_genomic.fna |
| 4102 | <i>Coxiella burnetii</i>           | GCA_000367725.3_Z3055_genomic.fna       |
| 4103 | <i>Bacillus subtilis</i>           | GCA_000293765.1_ASM29376v1_genomic.fna  |
| 4104 | <i>Lactobacillus casei</i>         | GCA_000418515.1_ASM41851v1_genomic.fna  |
| 4105 | <i>Lactobacillus helveticus</i>    | GCA_000961015.1_ASM96101v1_genomic.fna  |
| 4106 | <i>Rickettsia rickettsii</i>       | GCA_000283955.1_ASM28395v1_genomic.fna  |
| 4107 | <i>Vibrio parahaemolyticus</i>     | GCA_001304775.1_ASM130477v1_genomic.fna |
| 4108 | <i>Lactobacillus fermentum</i>     | GCA_002119645.1_ASM211964v1_genomic.fna |
| 4109 | <i>Mycoplasma mycoides</i>         | GCA_001267815.1_ASM126781v1_genomic.fna |
| 4110 | <i>Ureaplasma parvum</i>           | GCA_002205735.1_ASM220573v1_genomic.fna |
| 4111 | <i>Burkholderia thailandensis</i>  | GCA_000764595.1_ASM76459v1_genomic.fna  |

|      |                                     |                                         |
|------|-------------------------------------|-----------------------------------------|
| 4112 | <i>Phaeobacter gallaeciensis</i>    | GCA_002381385.1_ASM238138v1_genomic.fna |
| 4113 | <i>Rickettsia prowazekii</i>        | GCA_000277265.1_ASM27726v1_genomic.fna  |
| 4114 | <i>Clostridium botulinum</i>        | GCA_000019305.1_ASM1930v1_genomic.fna   |
| 4115 | <i>Klebsiella pneumoniae</i>        | GCA_000281535.2_ASM28153v2_genomic.fna  |
| 4116 | <i>Borrelia burgdorferi</i>         | GCA_002151485.1_ASM215148v1_genomic.fna |
| 4117 | <i>Rhizobium leguminosarum</i>      | GCA_001890425.1_ASM189042v1_genomic.fna |
| 4118 | <i>Brucella canis</i>               | GCA_002591255.1_ASM259125v1_genomic.fna |
| 4119 | <i>Brucella suis</i>                | GCA_000698285.1_ASM69828v1_genomic.fna  |
| 4120 | <i>Enterococcus faecalis</i>        | GCA_000550745.1_ASM55074v1_genomic.fna  |
| 4121 | <i>Rhizobium etli</i>               | GCA_002119845.1_ASM211984v1_genomic.fna |
| 4122 | <i>Chlamydia psittaci</i>           | GCA_000298415.1_ASM29841v1_genomic.fna  |
| 4123 | <i>Bifidobacterium animalis</i>     | GCA_000224965.2_ASM22496v2_genomic.fna  |
| 4124 | <i>Bacillus amyloliquefaciens</i>   | GCA_000494835.1_ASM49483v1_genomic.fna  |
| 4125 | <i>Neisseria gonorrhoeae</i>        | GCA_001661085.1_ASM166108v1_genomic.fna |
| 4126 | <i>Enterococcus faecium</i>         | GCA_001412695.1_ASM141269v1_genomic.fna |
| 4127 | <i>Stenotrophomonas maltophilia</i> | GCA_001274675.1_ASM127467v1_genomic.fna |
| 4128 | <i>Zymomonas mobilis</i>            | GCA_000576125.1_ASM57612v1_genomic.fna  |
| 4129 | <i>Acetobacter pasteurianus</i>     | GCA_000010925.1_ASM1092v1_genomic.fna   |
| 4130 | <i>Pasteurella multocida</i>        | GCA_000973525.1_ASM97352v1_genomic.fna  |
| 4131 | <i>Francisella philomiragia</i>     | GCA_000833455.1_ASM83345v1_genomic.fna  |
| 4132 | <i>Lactobacillus rhamnosus</i>      | GCA_001721925.1_ASM172192v1_genomic.fna |
| 4133 | <i>Brucella melitensis</i>          | GCA_000740415.1_ASM74041v1_genomic.fna  |
| 4134 | <i>Bacillus megaterium</i>          | GCA_002009195.1_ASM200919v1_genomic.fna |
| 4135 | <i>Sinorhizobium meliloti</i>       | GCA_000346065.1_ASM34606v1_genomic.fna  |
| 4136 | <i>Bordetella pertussis</i>         | GCA_001307525.1_ASM130752v1_genomic.fna |
| 4137 | <i>Haemophilus ducreyi</i>          | GCA_001647815.1_ASM164781v1_genomic.fna |
| 4138 | <i>Corynebacterium diphtheriae</i>  | GCA_000242775.1_ASM24277v1_genomic.fna  |
| 4139 | <i>Mycoplasma pneumoniae</i>        | GCA_000387745.2_ASM38774v2_genomic.fna  |
| 4140 | <i>Yersinia enterocolitica</i>      | GCA_000987925.1_ASM98792v1_genomic.fna  |
| 4141 | <i>Dehalococcoides mccartyi</i>     | GCA_000341655.1_ASM34165v1_genomic.fna  |
| 4142 | <i>Chlamydia muridarum</i>          | GCA_000830965.1_ASM83096v1_genomic.fna  |
| 4143 | <i>Leuconostoc mesenteroides</i>    | GCA_001891125.1_ASM189112v1_genomic.fna |
| 4144 | <i>Serratia marcescens</i>          | GCA_001294565.1_ASM129456v1_genomic.fna |
| 4145 | <i>Lactobacillus plantarum</i>      | GCA_000604105.1_ASM60410v1_genomic.fna  |

|      |                                           |                                           |
|------|-------------------------------------------|-------------------------------------------|
| 4146 | <i>Mannheimia haemolytica</i>             | GCA_000439735.1_ASM43973v1_genomic.fna    |
| 4147 | <i>Lactobacillus brevis</i>               | GCA_002117375.1_ASM211737v1_genomic.fna   |
| 4148 | <i>Mycoplasma gallisepticum</i>           | GCA_000286715.1_ASM28671v1_genomic.fna    |
| 4149 | <i>Propionibacterium acnes</i>            | GCA_000240035.1_ASM24003v1_genomic.fna    |
| 4150 | <i>Mycoplasma bovis</i>                   | GCA_001611895.1_ASM161189v1_genomic.fna   |
| 4151 | <i>Campylobacter lari</i>                 | GCA_001017575.1_ASM101757v1_genomic.fna   |
| 4152 | <i>Proteus mirabilis</i>                  | GCA_002180235.1_ASM218023v1_genomic.fna   |
| 4153 | <i>Klebsiella oxytoca</i>                 | GCA_001970835.1_ASM197083v1_genomic.fna   |
| 4154 | <i>Campylobacter coli</i>                 | GCA_001417635.1_ASM141763v1_genomic.fna   |
| 4155 | <i>Lactobacillus salivarius</i>           | GCA_900094615.1_ASM90009461v1_genomic.fna |
| 4156 | <i>Enterobacter cloacae</i>               | GCA_000770155.1_ASM77015v1_genomic.fna    |
| 4157 | <i>Listeria ivanovii</i>                  | GCA_900187195.1_51485_F01_genomic.fna     |
| 4158 | <i>Bifidobacterium breve</i>              | GCA_000569035.1_ASM56903v1_genomic.fna    |
| 4159 | <i>Mycobacterium abscessus</i>            | GCA_000770215.1_ASM77021v1_genomic.fna    |
| 4160 | <i>Paenibacillus polymyxa</i>             | GCA_001719045.1_ASM171904v1_genomic.fna   |
| 4161 | <i>Pseudomonas stutzeri</i>               | GCA_000327065.1_ASM32706v1_genomic.fna    |
| 4162 | <i>Aeromonas hydrophila</i>               | GCA_000819505.1_ASM81950v1_genomic.fna    |
| 4163 | <i>Granulibacter bethesdensis</i>         | GCA_001889485.1_ASM188948v1_genomic.fna   |
| 4164 | <i>Flavobacterium psychrophilum</i>       | GCA_000831205.1_ASM83120v1_genomic.fna    |
| 4165 | <i>Lactobacillus johnsonii</i>            | GCA_002176855.1_ASM217685v1_genomic.fna   |
| 4166 | <i>Bdellovibrio bacteriovorus</i>         | GCA_002208115.1_ASM220811v1_genomic.fna   |
| 4167 | <i>Lactobacillus paracasei</i>            | GCA_001514415.1_ASM151441v1_genomic.fna   |
| 4168 | <i>Klebsiella variicola</i>               | GCA_001989535.1_ASM198953v1_genomic.fna   |
| 4169 | <i>Vibrio alginolyticus</i>               | GCA_002119545.1_ASM211954v1_genomic.fna   |
| 4170 | <i>Corynebacterium pseudotuberculosis</i> | GCA_000227605.2_ASM22760v2_genomic.fna    |
| 4171 | <i>Riemerella anatipestifer</i>           | GCA_001051115.1_ASM105111v1_genomic.fna   |
| 4172 | <i>Staphylococcus lugdunensis</i>         | GCA_002407165.1_ASM240716v1_genomic.fna   |
| 4173 | <i>Taylorella equigenitalis</i>           | GCA_002288245.1_ASM228824v1_genomic.fna   |
| 4174 | <i>Citrobacter freundii</i>               | GCA_002211705.1_ASM221170v1_genomic.fna   |
| 4175 | <i>Vibrio anguillarum</i>                 | GCA_002211985.1_ASM221198v1_genomic.fna   |
| 4176 | <i>Enterobacter hormaechei</i>            | GCA_001729705.1_ASM172970v1_genomic.fna   |
| 4177 | <i>Klebsiella aerogenes</i>               | GCA_002591115.1_ASM259111v1_genomic.fna   |
| 4178 | <i>Corynebacterium ulcerans</i>           | GCA_000767685.1_ASM76768v1_genomic.fna    |
| 4179 | <i>Burkholderia cepacia</i>               | GCA_001718835.1_ASM171883v1_genomic.fna   |

|      |                                           |                                           |
|------|-------------------------------------------|-------------------------------------------|
| 4180 | <i>Rickettsia japonica</i>                | GCA_002357195.1_ASM235719v1_genomic.fna   |
| 4181 | <i>Piscirickettsia salmonis</i>           | GCA_001932595.1_ASM193259v1_genomic.fna   |
| 4182 | <i>Francisella noatunensis</i>            | GCA_001885275.1_ASM188527v1_genomic.fna   |
| 4183 | <i>Elizabethkingia anophelis</i>          | GCA_001618545.2_ASM161854v2_genomic.fna   |
| 4184 | <i>Rhizobium phaseoli</i>                 | GCA_001664225.1_ASM166422v1_genomic.fna   |
| 4185 | <i>Bacillus velezensis</i>                | GCA_000455585.1_ucmb5113v1_genomic.fna    |
| 4186 | <i>Klebsiella michiganensis</i>           | GCA_002290285.1_ASM229028v1_genomic.fna   |
| 4187 | <i>Mycobacterium chimaera</i>             | GCA_002287605.1_ASM228760v1_genomic.fna   |
| 4188 | <i>Alteromonas mediterranea</i>           | GCA_000439595.1_ASM43959v1_genomic.fna    |
| 4189 | <i>Alteromonas mediterranea</i>           | GCA_001562315.1_ASM156231v1_genomic.fna   |
| 4190 | <i>Mycobacterium chimaera</i>             | GCA_900116695.1_ASM90011669v1_genomic.fna |
| 4191 | <i>Oblitimonas alkaliphila</i>            | GCA_001267235.1_ASM126723v1_genomic.fna   |
| 4192 | <i>Bacillus velezensis</i>                | GCA_000493375.1_BAPNAU_WGS_genomic.fna    |
| 4193 | <i>Enterobacter cloacae</i>               | GCA_002208095.1_ASM220809v1_genomic.fna   |
| 4194 | <i>Rhizobium phaseoli</i>                 | GCA_001664245.1_ASM166424v1_genomic.fna   |
| 4195 | <i>Elizabethkingia anophelis</i>          | GCA_002022025.1_ASM202202v1_genomic.fna   |
| 4196 | <i>Francisella noatunensis</i>            | GCA_002214225.1_ASM221422v1_genomic.fna   |
| 4197 | <i>Piscirickettsia salmonis</i>           | GCA_001932735.1_ASM193273v1_genomic.fna   |
| 4198 | <i>Rickettsia japonica</i>                | GCA_002357215.1_ASM235721v1_genomic.fna   |
| 4199 | <i>Burkholderia cepacia</i>               | GCA_002209085.1_ASM220908v1_genomic.fna   |
| 4200 | <i>Corynebacterium ulcerans</i>           | GCA_000769635.1_ASM76963v1_genomic.fna    |
| 4201 | <i>Enterobacter hormaechei</i>            | GCA_001874505.1_ASM187450v1_genomic.fna   |
| 4202 | <i>Vibrio anguillarum</i>                 | GCA_002212005.1_ASM221200v1_genomic.fna   |
| 4203 | <i>Citrobacter freundii</i>               | GCA_002215385.1_ASM221538v1_genomic.fna   |
| 4204 | <i>Staphylococcus lugdunensis</i>         | GCA_002591215.1_ASM259121v1_genomic.fna   |
| 4205 | <i>Riemerella anatipestifer</i>           | GCA_001077795.1_ASM107779v1_genomic.fna   |
| 4206 | <i>Corynebacterium pseudotuberculosis</i> | GCA_000233735.1_ASM23373v1_genomic.fna    |
| 4207 | <i>Vibrio alginolyticus</i>               | GCA_002119565.1_ASM211956v1_genomic.fna   |
| 4208 | <i>Lactobacillus paracasei</i>            | GCA_002079285.1_ASM207928v1_genomic.fna   |
| 4209 | <i>Flavobacterium psychrophilum</i>       | GCA_000831225.1_ASM83122v1_genomic.fna    |
| 4210 | <i>Granulibacter bethesdaensis</i>        | GCA_001889505.1_ASM188950v1_genomic.fna   |
| 4211 | <i>Aeromonas hydrophila</i>               | GCA_000940915.1_ASM94091v1_genomic.fna    |
| 4212 | <i>Pseudomonas stutzeri</i>               | GCA_000661915.1_ASM66191v1_genomic.fna    |
| 4213 | <i>Paenibacillus polymyxa</i>             | GCA_001874405.2_ASM187440v2_genomic.fna   |

|      |                                     |                                         |
|------|-------------------------------------|-----------------------------------------|
| 4214 | <i>Mycobacterium abscessus</i>      | GCA_001050395.1_ASM105039v1_genomic.fna |
| 4215 | <i>Bifidobacterium breve</i>        | GCA_000569055.1_ASM56905v1_genomic.fna  |
| 4216 | <i>Enterobacter cloacae</i>         | GCA_000784865.1_ASM78486v1_genomic.fna  |
| 4217 | <i>Campylobacter coli</i>           | GCA_001483845.1_ASM148384v1_genomic.fna |
| 4218 | <i>Klebsiella oxytoca</i>           | GCA_002072655.1_ASM207265v1_genomic.fna |
| 4219 | <i>Proteus mirabilis</i>            | GCA_002197405.1_ASM219740v1_genomic.fna |
| 4220 | <i>Mycoplasma bovis</i>             | GCA_001611935.1_ASM161193v1_genomic.fna |
| 4221 | <i>Propionibacterium acnes</i>      | GCA_000240055.1_ASM24005v1_genomic.fna  |
| 4222 | <i>Mycoplasma gallisepticum</i>     | GCA_000286735.1_ASM28673v1_genomic.fna  |
| 4223 | <i>Serratia marcescens</i>          | GCA_001417865.2_ASM141786v2_genomic.fna |
| 4224 | <i>Lactobacillus brevis</i>         | GCA_002138395.1_ASM213839v1_genomic.fna |
| 4225 | <i>Mannheimia haemolytica</i>       | GCA_000819525.2_ASM81952v2_genomic.fna  |
| 4226 | <i>Leuconostoc mesenteroides</i>    | GCA_002009375.1_ASM200937v1_genomic.fna |
| 4227 | <i>Lactobacillus plantarum</i>      | GCA_000931425.1_ASM93142v1_genomic.fna  |
| 4228 | <i>Dehalococcoides mccartyi</i>     | GCA_000341695.1_ASM34169v1_genomic.fna  |
| 4229 | <i>Yersinia enterocolitica</i>      | GCA_001304755.1_ASM130475v1_genomic.fna |
| 4230 | <i>Mycoplasma pneumoniae</i>        | GCA_000733995.1_ASM73399v1_genomic.fna  |
| 4231 | <i>Corynebacterium diphtheriae</i>  | GCA_000255155.1_ASM25515v1_genomic.fna  |
| 4232 | <i>Haemophilus ducreyi</i>          | GCA_001647835.1_ASM164783v1_genomic.fna |
| 4233 | <i>Bordetella pertussis</i>         | GCA_001307565.1_ASM130756v1_genomic.fna |
| 4234 | <i>Sinorhizobium meliloti</i>       | GCA_000747295.1_ASM74729v1_genomic.fna  |
| 4235 | <i>Brucella melitensis</i>          | GCA_001307475.2_ASM130747v2_genomic.fna |
| 4236 | <i>Brucella ceti</i>                | GCA_000590815.1_ASM59081v1_genomic.fna  |
| 4237 | <i>Lactobacillus rhamnosus</i>      | GCA_001988935.1_ASM198893v1_genomic.fna |
| 4238 | <i>Pasteurella multocida</i>        | GCA_000973565.1_ASM97356v1_genomic.fna  |
| 4239 | <i>Acetobacter pasteurianus</i>     | GCA_000010945.1_ASM1094v1_genomic.fna   |
| 4240 | <i>Zymomonas mobilis</i>            | GCA_000576165.1_ASM57616v1_genomic.fna  |
| 4241 | <i>Stenotrophomonas maltophilia</i> | GCA_002025605.1_ASM202560v1_genomic.fna |
| 4242 | <i>Enterococcus faecium</i>         | GCA_001518735.1_ASM151873v1_genomic.fna |
| 4243 | <i>Neisseria gonorrhoeae</i>        | GCA_001661115.1_ASM166111v1_genomic.fna |
| 4244 | <i>Bacillus amyloliquefaciens</i>   | GCA_000508265.1_ASM50826v1_genomic.fna  |
| 4245 | <i>Bifidobacterium animalis</i>     | GCA_000260715.1_ASM26071v1_genomic.fna  |
| 4246 | <i>Chlamydia psittaci</i>           | GCA_000298435.2_ASM29843v2_genomic.fna  |
| 4247 | <i>Klebsiella pneumoniae</i>        | GCA_000294365.1_ASM29436v1_genomic.fna  |

|      |                                    |                                         |
|------|------------------------------------|-----------------------------------------|
| 4248 | <i>Brucella suis</i>               | GCA_000698325.1_ASM69832v1_genomic.fna  |
| 4249 | <i>Rhizobium leguminosarum</i>     | GCA_002240185.1_ASM224018v1_genomic.fna |
| 4250 | <i>Borrelia burgdorferi</i>        | GCA_002151505.1_ASM215150v1_genomic.fna |
| 4251 | <i>Enterococcus faecalis</i>       | GCA_000742975.1_ASM74297v1_genomic.fna  |
| 4252 | <i>Clostridium botulinum</i>       | GCA_000019545.1_ASM1954v1_genomic.fna   |
| 4253 | <i>Rickettsia prowazekii</i>       | GCA_000363905.1_ASM36390v1_genomic.fna  |
| 4254 | <i>Phaeobacter gallaeciensis</i>   | GCA_002393525.1_ASM239352v1_genomic.fna |
| 4255 | <i>Burkholderia thailandensis</i>  | GCA_000765375.1_ASM76537v1_genomic.fna  |
| 4256 | <i>Mycoplasma mycoides</i>         | GCA_001554055.1_ASM155405v1_genomic.fna |
| 4257 | <i>Lactobacillus fermentum</i>     | GCA_002192435.1_ASM219243v1_genomic.fna |
| 4258 | <i>Vibrio parahaemolyticus</i>     | GCA_001433415.1_ASM143341v1_genomic.fna |
| 4259 | <i>Rickettsia rickettsii</i>       | GCA_000831525.1_ASM83152v1_genomic.fna  |
| 4260 | <i>Lactobacillus helveticus</i>    | GCA_001006025.1_ASM100602v1_genomic.fna |
| 4261 | <i>Lactobacillus casei</i>         | GCA_000829055.1_ASM82905v1_genomic.fna  |
| 4262 | <i>Bacillus subtilis</i>           | GCA_000321395.1_ASM32139v1_genomic.fna  |
| 4263 | <i>Coxiella burnetii</i>           | GCA_001572745.1_ASM157274v1_genomic.fna |
| 4264 | <i>Clostridioides difficile</i>    | GCA_002073735.1_ASM207373v1_genomic.fna |
| 4265 | <i>Xanthomonas oryzae</i>          | GCA_001042745.1_ASM104274v1_genomic.fna |
| 4266 | <i>Campylobacter fetus</i>         | GCA_000967135.1_CFV_genomic.fna         |
| 4267 | <i>Xanthomonas citri</i>           | GCA_000961215.1_ASM96121v1_genomic.fna  |
| 4268 | <i>Lactobacillus delbrueckii</i>   | GCA_001888945.1_ASM188894v1_genomic.fna |
| 4269 | <i>Brucella abortus</i>            | GCA_000740195.1_ASM74019v1_genomic.fna  |
| 4270 | <i>Francisella tularensis</i>      | GCA_000017785.1_ASM1778v1_genomic.fna   |
| 4271 | <i>Yersinia pseudotuberculosis</i> | GCA_000834375.1_ASM83437v1_genomic.fna  |
| 4272 | <i>Streptococcus salivarius</i>    | GCA_002094955.1_ASM209495v1_genomic.fna |
| 4273 | <i>Rhodospseudomonas palustris</i> | GCA_000020445.1_ASM2044v1_genomic.fna   |
| 4274 | <i>Vibrio cholerae</i>             | GCA_000250855.1_ASM25085v1_genomic.fna  |
| 4275 | <i>Ralstonia solanacearum</i>      | GCA_001663415.1_ASM166341v1_genomic.fna |
| 4276 | <i>Bacillus thuringiensis</i>      | GCA_000292705.1_ASM29270v1_genomic.fna  |
| 4277 | <i>Ehrlichia chaffeensis</i>       | GCA_000632965.1_ASM63296v1_genomic.fna  |
| 4278 | <i>Burkholderia mallei</i>         | GCA_000755885.1_ASM75588v1_genomic.fna  |
| 4279 | <i>Burkholderia pseudomallei</i>   | GCA_000511895.1_ASM51189v1_genomic.fna  |
| 4280 | <i>Burkholderia cenocepacia</i>    | GCA_001484665.1_ASM148466v1_genomic.fna |
| 4281 | <i>Shigella sonnei</i>             | GCA_002224625.1_ASM222462v1_genomic.fna |

|      |                                   |                                         |
|------|-----------------------------------|-----------------------------------------|
| 4282 | <i>Chlamydia trachomatis</i>      | GCA_000092665.1_ASM9266v1_genomic.fna   |
| 4283 | <i>Corynebacterium glutamicum</i> | GCA_000742715.1_ASM74271v1_genomic.fna  |
| 4284 | <i>Bacillus pumilus</i>           | GCA_001548215.1_ASM154821v1_genomic.fna |
| 4285 | <i>Lactobacillus reuteri</i>      | GCA_001618905.1_ASM161890v1_genomic.fna |
| 4286 | <i>Streptococcus thermophilus</i> | GCA_000971665.1_ASM97166v1_genomic.fna  |
| 4287 | <i>Legionella pneumophila</i>     | GCA_000306865.1_ASM30686v1_genomic.fna  |
| 4288 | <i>Bacillus licheniformis</i>     | GCA_002074135.1_ASM207413v1_genomic.fna |
| 4289 | <i>Pseudomonas aeruginosa</i>     | GCA_000284555.1_ASM28455v1_genomic.fna  |
| 4290 | <i>Acinetobacter baumannii</i>    | GCA_000188215.1_ASM18821v1_genomic.fna  |
| 4291 | <i>Streptococcus suis</i>         | GCA_000231865.1_ASM23186v1_genomic.fna  |
| 4292 | <i>Vibrio vulnificus</i>          | GCA_001653775.1_ASM165377v1_genomic.fna |
| 4293 | <i>Histophilus somni</i>          | GCA_002162275.1_ASM216227v1_genomic.fna |
| 4294 | <i>Pseudomonas syringae</i>       | GCA_001281365.1_ASM128136v1_genomic.fna |
| 4295 | <i>Bifidobacterium longum</i>     | GCA_000219455.1_ASM21945v1_genomic.fna  |
| 4296 | <i>Shigella flexneri</i>          | GCA_001021855.1_ASM102185v1_genomic.fna |
| 4297 | <i>Streptococcus agalactiae</i>   | GCA_000689235.1_GBCO_p1_genomic.fna     |
| 4298 | <i>Leptospira interrogans</i>     | GCA_001293065.1_ASM129306v1_genomic.fna |
| 4299 | <i>Fusobacterium nucleatum</i>    | GCA_001296165.1_ASM129616v1_genomic.fna |
| 4300 | <i>Bacillus anthracis</i>         | GCA_000583105.1_ASM58310v1_genomic.fna  |
| 4301 | <i>Streptococcus pneumoniae</i>   | GCA_000019265.1_ASM1926v1_genomic.fna   |
| 4302 | <i>Streptococcus pyogenes</i>     | GCA_000012165.1_ASM1216v1_genomic.fna   |
| 4303 | <i>Xylella fastidiosa</i>         | GCA_001456195.1_ASM145619v1_genomic.fna |
| 4304 | <i>Pseudomonas putida</i>         | GCA_000226035.3_ASM22603v3_genomic.fna  |
| 4305 | <i>Neisseria meningitidis</i>     | GCA_000191425.1_ASM19142v1_genomic.fna  |
| 4306 | <i>Buchnera aphidicola</i>        | GCA_000225465.1_ASM22546v1_genomic.fna  |
| 4307 | <i>Chlamydia pneumoniae</i>       | GCA_001007065.1_CWL011_genomic.fna      |
| 4308 | <i>Helicobacter pylori</i>        | GCA_000023805.1_ASM2380v1_genomic.fna   |
| 4309 | <i>Escherichia coli</i>           | GCA_000009565.2_ASM956v1_genomic.fna    |
| 4310 | <i>Haemophilus influenzae</i>     | GCA_000465255.1_ASM46525v1_genomic.fna  |
| 4311 | <i>Mycobacterium tuberculosis</i> | GCA_000154605.2_ASM15460v2_genomic.fna  |
| 4312 | <i>Mycobacterium bovis</i>        | GCA_000934325.3_ASM93432v3_genomic.fna  |
| 4313 | <i>Mycobacterium avium</i>        | GCA_000831285.1_ASM83128v1_genomic.fna  |
| 4314 | <i>Listeria monocytogenes</i>     | GCA_000168595.2_ASM16859v2_genomic.fna  |
| 4315 | <i>Clostridium perfringens</i>    | GCA_002312985.1_ASM231298v1_genomic.fna |

|      |                                   |                                         |
|------|-----------------------------------|-----------------------------------------|
| 4316 | <i>Bacillus cereus</i>            | GCA_000021785.1_ASM2178v1_genomic.fna   |
| 4317 | <i>Lactococcus lactis</i>         | GCA_000312685.1_ASM31268v1_genomic.fna  |
| 4318 | <i>Staphylococcus epidermidis</i> | GCA_900086615.1_BPH0662_genomic.fna     |
| 4319 | <i>Staphylococcus aureus</i>      | GCA_000011265.1_ASM1126v1_genomic.fna   |
| 4320 | <i>Yersinia pestis</i>            | GCA_000022805.1_ASM2280v1_genomic.fna   |
| 4321 | <i>Pseudomonas fluorescens</i>    | GCA_000963495.1_ASM96349v1_genomic.fna  |
| 4322 | <i>Campylobacter jejuni</i>       | GCA_000148705.1_ASM14870v1_genomic.fna  |
| 4323 | <i>Salmonella enterica</i>        | GCA_000016045.1_ASM1604v1_genomic.fna   |
| 4324 | <i>Salmonella enterica</i>        | GCA_000018385.1_ASM1838v1_genomic.fna   |
| 4325 | <i>Campylobacter jejuni</i>       | GCA_000171795.2_ASM17179v2_genomic.fna  |
| 4326 | <i>Pseudomonas fluorescens</i>    | GCA_000968415.1_ASM96841v1_genomic.fna  |
| 4327 | <i>Yersinia pestis</i>            | GCA_000022825.1_ASM2282v1_genomic.fna   |
| 4328 | <i>Staphylococcus aureus</i>      | GCA_000011505.1_ASM1150v1_genomic.fna   |
| 4329 | <i>Lactococcus lactis</i>         | GCA_000344575.1_ASM34457v1_genomic.fna  |
| 4330 | <i>Bacillus cereus</i>            | GCA_000022505.1_ASM2250v1_genomic.fna   |
| 4331 | <i>Clostridium perfringens</i>    | GCA_002355795.1_ASM235579v1_genomic.fna |
| 4332 | <i>Listeria monocytogenes</i>     | GCA_000168635.2_ASM16863v2_genomic.fna  |
| 4333 | <i>Mycobacterium avium</i>        | GCA_000835225.1_ASM83522v1_genomic.fna  |
| 4334 | <i>Mycobacterium bovis</i>        | GCA_000967285.1_ASM96728v1_genomic.fna  |
| 4335 | <i>Haemophilus influenzae</i>     | GCA_000698365.1_ASM69836v1_genomic.fna  |
| 4336 | <i>Mycobacterium tuberculosis</i> | GCA_000193185.2_ASM19318v2_genomic.fna  |
| 4337 | <i>Escherichia coli</i>           | GCA_000010245.1_ASM1024v1_genomic.fna   |
| 4338 | <i>Helicobacter pylori</i>        | GCA_000091345.1_ASM9134v1_genomic.fna   |
| 4339 | <i>Chlamydia pneumoniae</i>       | GCA_001007085.1_Wien3_genomic.fna       |
| 4340 | <i>Buchnera aphidicola</i>        | GCA_001280225.1_ASM128022v1_genomic.fna |
| 4341 | <i>Neisseria meningitidis</i>     | GCA_000191445.1_ASM19144v1_genomic.fna  |
| 4342 | <i>Xylella fastidiosa</i>         | GCA_001456235.1_ASM145623v1_genomic.fna |
| 4343 | <i>Pseudomonas putida</i>         | GCA_000264665.1_ASM26466v1_genomic.fna  |
| 4344 | <i>Streptococcus pyogenes</i>     | GCA_000013485.1_ASM1348v1_genomic.fna   |
| 4345 | <i>Streptococcus pneumoniae</i>   | GCA_000019825.1_ASM1982v1_genomic.fna   |
| 4346 | <i>Fusobacterium nucleatum</i>    | GCA_001433955.1_ASM143395v1_genomic.fna |
| 4347 | <i>Leptospira interrogans</i>     | GCA_002073495.1_ASM207349v1_genomic.fna |
| 4348 | <i>Streptococcus agalactiae</i>   | GCA_000730215.2_ASM73021v2_genomic.fna  |
| 4349 | <i>Bacillus anthracis</i>         | GCA_000725325.1_ASM72532v1_genomic.fna  |



|      |                                    |                                         |
|------|------------------------------------|-----------------------------------------|
| 4350 | <i>Bifidobacterium longum</i>      | GCA_000269965.1_ASM26996v1_genomic.fna  |
| 4351 | <i>Shigella flexneri</i>           | GCA_001578125.1_ASM157812v1_genomic.fna |
| 4352 | <i>Histophilus somni</i>           | GCA_002162295.1_ASM216229v1_genomic.fna |
| 4353 | <i>Pseudomonas syringae</i>        | GCA_001482725.1_ASM148272v1_genomic.fna |
| 4354 | <i>Vibrio vulnificus</i>           | GCA_001675245.1_ASM167524v1_genomic.fna |
| 4355 | <i>Streptococcus suis</i>          | GCA_000231885.1_ASM23188v1_genomic.fna  |
| 4356 | <i>Acinetobacter baumannii</i>     | GCA_000226275.1_ASM22627v1_genomic.fna  |
| 4357 | <i>Pseudomonas aeruginosa</i>      | GCA_000359505.1_ASM35950v1_genomic.fna  |
| 4358 | <i>Bacillus licheniformis</i>      | GCA_002173615.1_ASM217361v1_genomic.fna |
| 4359 | <i>Legionella pneumophila</i>      | GCA_000347615.1_ASM34761v1_genomic.fna  |
| 4360 | <i>Shigella sonnei</i>             | GCA_002442535.1_ASM244253v1_genomic.fna |
| 4361 | <i>Streptococcus thermophilus</i>  | GCA_001008015.1_ASM100801v1_genomic.fna |
| 4362 | <i>Bacillus pumilus</i>            | GCA_001578165.1_ASM157816v1_genomic.fna |
| 4363 | <i>Lactobacillus reuteri</i>       | GCA_001688685.2_ASM168868v2_genomic.fna |
| 4364 | <i>Corynebacterium glutamicum</i>  | GCA_000742735.1_ASM74273v1_genomic.fna  |
| 4365 | <i>Chlamydia trachomatis</i>       | GCA_000092685.1_ASM9268v1_genomic.fna   |
| 4366 | <i>Burkholderia cenocepacia</i>    | GCA_001606115.1_ASM160611v1_genomic.fna |
| 4367 | <i>Burkholderia pseudomallei</i>   | GCA_000511915.1_ASM51191v1_genomic.fna  |
| 4368 | <i>Bacillus thuringiensis</i>      | GCA_000300475.1_ASM30047v1_genomic.fna  |
| 4369 | <i>Burkholderia mallei</i>         | GCA_000756025.2_ASM75602v2_genomic.fna  |
| 4370 | <i>Ralstonia solanacearum</i>      | GCA_001708525.1_ASM170852v1_genomic.fna |
| 4371 | <i>Vibrio cholerae</i>             | GCA_000765415.1_ASM76541v1_genomic.fna  |
| 4372 | <i>Rhodopseudomonas palustris</i>  | GCA_000177255.2_ASM17725v2_genomic.fna  |
| 4373 | <i>Streptococcus salivarius</i>    | GCA_002094975.1_ASM209497v1_genomic.fna |
| 4374 | <i>Yersinia pseudotuberculosis</i> | GCA_000834415.1_ASM83441v1_genomic.fna  |
| 4375 | <i>Francisella tularensis</i>      | GCA_000018925.1_ASM1892v1_genomic.fna   |
| 4376 | <i>Brucella abortus</i>            | GCA_000740215.1_ASM74021v1_genomic.fna  |
| 4377 | <i>Lactobacillus delbrueckii</i>   | GCA_001888965.1_ASM188896v1_genomic.fna |
| 4378 | <i>Xanthomonas citri</i>           | GCA_000961235.1_ASM96123v1_genomic.fna  |
| 4379 | <i>Campylobacter fetus</i>         | GCA_001484645.1_ASM148464v1_genomic.fna |
| 4380 | <i>Xanthomonas oryzae</i>          | GCA_001042775.1_ASM104277v1_genomic.fna |
| 4381 | <i>Clostridioides difficile</i>    | GCA_002080065.1_ASM208006v1_genomic.fna |
| 4382 | <i>Coxiella burnetii</i>           | GCA_002094935.1_ASM209493v1_genomic.fna |
| 4383 | <i>Bacillus subtilis</i>           | GCA_000338735.1_ASM33873v1_genomic.fna  |

|      |                                     |                                         |
|------|-------------------------------------|-----------------------------------------|
| 4384 | <i>Lactobacillus casei</i>          | GCA_002192215.1_ASM219221v1_genomic.fna |
| 4385 | <i>Delftia acidovorans</i>          | GCA_001969245.1_ASM196924v1_genomic.fna |
| 4386 | <i>Lactobacillus helveticus</i>     | GCA_001702095.1_ASM170209v1_genomic.fna |
| 4387 | <i>Rickettsia rickettsii</i>        | GCA_000831545.1_ASM83154v1_genomic.fna  |
| 4388 | <i>Vibrio parahaemolyticus</i>      | GCA_001558495.1_ASM155849v1_genomic.fna |
| 4389 | <i>Lactobacillus fermentum</i>      | GCA_002356135.1_ASM235613v1_genomic.fna |
| 4390 | <i>Mycoplasma mycoides</i>          | GCA_001554075.1_ASM155407v1_genomic.fna |
| 4391 | <i>Burkholderia thailandensis</i>   | GCA_000808035.2_ASM80803v2_genomic.fna  |
| 4392 | <i>Rickettsia prowazekii</i>        | GCA_000367405.1_ASM36740v1_genomic.fna  |
| 4393 | <i>Clostridium botulinum</i>        | GCA_000020285.1_ASM2028v1_genomic.fna   |
| 4394 | <i>Borrelia burgdorferi</i>         | GCA_002442595.1_ASM244259v1_genomic.fna |
| 4395 | <i>Rhizobium leguminosarum</i>      | GCA_002243365.1_ASM224336v1_genomic.fna |
| 4396 | <i>Brucella suis</i>                | GCA_000698345.1_ASM69834v1_genomic.fna  |
| 4397 | <i>Enterococcus faecalis</i>        | GCA_001598635.1_ASM159863v1_genomic.fna |
| 4398 | <i>Klebsiella pneumoniae</i>        | GCA_000364385.3_ASM36438v3_genomic.fna  |
| 4399 | <i>Chlamydia psittaci</i>           | GCA_000298455.2_ASM29845v2_genomic.fna  |
| 4400 | <i>Bifidobacterium animalis</i>     | GCA_000277325.1_ASM27732v1_genomic.fna  |
| 4401 | <i>Bacillus amyloliquefaciens</i>   | GCA_000833005.1_ASM83300v1_genomic.fna  |
| 4402 | <i>Neisseria gonorrhoeae</i>        | GCA_001661135.1_ASM166113v1_genomic.fna |
| 4403 | <i>Enterococcus faecium</i>         | GCA_001587115.1_ASM158711v1_genomic.fna |
| 4404 | <i>Stenotrophomonas maltophilia</i> | GCA_002138415.1_ASM213841v1_genomic.fna |
| 4405 | <i>Zymomonas mobilis</i>            | GCA_002158845.1_ASM215884v1_genomic.fna |
| 4406 | <i>Acetobacter pasteurianus</i>     | GCA_000010965.1_ASM1096v1_genomic.fna   |
| 4407 | <i>Pasteurella multocida</i>        | GCA_001578435.2_ASM157843v2_genomic.fna |
| 4408 | <i>Lactobacillus rhamnosus</i>      | GCA_002076955.1_ASM207695v1_genomic.fna |
| 4409 | <i>Brucella melitensis</i>          | GCA_001431745.1_ASM143174v1_genomic.fna |
| 4410 | <i>Sinorhizobium meliloti</i>       | GCA_001050915.2_ASM105091v2_genomic.fna |
| 4411 | <i>Bordetella pertussis</i>         | GCA_001307585.1_ASM130758v1_genomic.fna |
| 4412 | <i>Haemophilus ducreyi</i>          | GCA_001647855.1_ASM164785v1_genomic.fna |
| 4413 | <i>Corynebacterium diphtheriae</i>  | GCA_000255175.1_ASM25517v1_genomic.fna  |
| 4414 | <i>Mycoplasma pneumoniae</i>        | GCA_001272715.1_ASM127271v1_genomic.fna |
| 4415 | <i>Yersinia enterocolitica</i>      | GCA_001305635.1_ASM130563v1_genomic.fna |
| 4416 | <i>Dehalococcoides mccartyi</i>     | GCA_000499365.1_ASM49936v1_genomic.fna  |
| 4417 | <i>Leuconostoc mesenteroides</i>    | GCA_002117185.1_ASM211718v1_genomic.fna |

|      |                                           |                                         |
|------|-------------------------------------------|-----------------------------------------|
| 4418 | <i>Mannheimia haemolytica</i>             | GCA_000963635.1_ASM96363v1_genomic.fna  |
| 4419 | <i>Lactobacillus plantarum</i>            | GCA_001272315.2_ASM127231v2_genomic.fna |
| 4420 | <i>Lactobacillus brevis</i>               | GCA_002173555.1_ASM217355v1_genomic.fna |
| 4421 | <i>Serratia marcescens</i>                | GCA_001672055.1_ASM167205v1_genomic.fna |
| 4422 | <i>Mycoplasma gallisepticum</i>           | GCA_000286755.1_ASM28675v1_genomic.fna  |
| 4423 | <i>Propionibacterium acnes</i>            | GCA_000302515.1_ASM30251v1_genomic.fna  |
| 4424 | <i>Mycoplasma bovis</i>                   | GCA_002009275.1_ASM200927v1_genomic.fna |
| 4425 | <i>Campylobacter coli</i>                 | GCA_001639125.1_ASM163912v1_genomic.fna |
| 4426 | <i>Proteus mirabilis</i>                  | GCA_002310875.1_ASM231087v1_genomic.fna |
| 4427 | <i>Citrobacter koseri</i>                 | GCA_001931885.1_ASM193188v1_genomic.fna |
| 4428 | <i>Enterobacter cloacae</i>               | GCA_000784905.1_ASM78490v1_genomic.fna  |
| 4429 | <i>Bifidobacterium breve</i>              | GCA_000569075.1_ASM56907v1_genomic.fna  |
| 4430 | <i>Mycobacterium abscessus</i>            | GCA_001430775.1_ASM143077v1_genomic.fna |
| 4431 | <i>Paenibacillus polymyxa</i>             | GCA_001874425.2_ASM187442v2_genomic.fna |
| 4432 | <i>Pseudomonas stutzeri</i>               | GCA_001038645.1_ASM103864v1_genomic.fna |
| 4433 | <i>Aeromonas hydrophila</i>               | GCA_000963645.1_ASM96364v1_genomic.fna  |
| 4434 | <i>Granulibacter bethesdensis</i>         | GCA_001889525.1_ASM188952v1_genomic.fna |
| 4435 | <i>Bacteroides dorei</i>                  | GCA_000738045.1_ASM73804v1_genomic.fna  |
| 4436 | <i>Lactobacillus paracasei</i>            | GCA_002257625.1_ASM225762v1_genomic.fna |
| 4437 | <i>Vibrio alginolyticus</i>               | GCA_002119585.1_ASM211958v1_genomic.fna |
| 4438 | <i>Corynebacterium pseudotuberculosis</i> | GCA_000241855.1_ASM24185v1_genomic.fna  |
| 4439 | <i>Riemerella anatipestifer</i>           | GCA_002025185.1_ASM202518v1_genomic.fna |
| 4440 | <i>Vibrio anguillarum</i>                 | GCA_002212025.1_ASM221202v1_genomic.fna |
| 4441 | <i>Corynebacterium ulcerans</i>           | GCA_000968945.1_ASM96894v1_genomic.fna  |
| 4442 | <i>Rickettsia japonica</i>                | GCA_002357235.1_ASM235723v1_genomic.fna |
| 4443 | <i>Piscirickettsia salmonis</i>           | GCA_001932755.1_ASM193275v1_genomic.fna |
| 4444 | <i>Elizabethkingia anophelis</i>          | GCA_002022065.1_ASM202206v1_genomic.fna |
| 4445 | <i>Rhizobium phaseoli</i>                 | GCA_001664285.1_ASM166428v1_genomic.fna |
| 4446 | <i>Bacillus velezensis</i>                | GCA_000583065.1_ASM58306v1_genomic.fna  |
| 4447 | <i>Alteromonas mediterranea</i>           | GCA_001886395.1_ASM188639v1_genomic.fna |
| 4448 | <i>Alteromonas mediterranea</i>           | GCA_001886415.1_ASM188641v1_genomic.fna |
| 4449 | <i>Bacillus velezensis</i>                | GCA_000685725.1_ASM68572v1_genomic.fna  |
| 4450 | <i>Clostridium tyrobutyricum</i>          | GCA_001679705.1_ASM167970v1_genomic.fna |
| 4451 | <i>Rhizobium phaseoli</i>                 | GCA_001664365.1_ASM166436v1_genomic.fna |

|      |                                           |                                         |
|------|-------------------------------------------|-----------------------------------------|
| 4452 | <i>Elizabethkingia anophelis</i>          | GCA_002023665.2_ASM202366v2_genomic.fna |
| 4453 | <i>Piscirickettsia salmonis</i>           | GCA_001932775.1_ASM193277v1_genomic.fna |
| 4454 | <i>Rickettsia japonica</i>                | GCA_002357255.1_ASM235725v1_genomic.fna |
| 4455 | <i>Corynebacterium ulcerans</i>           | GCA_001281445.1_ASM128144v1_genomic.fna |
| 4456 | <i>Vibrio anguillarum</i>                 | GCA_002287545.1_ASM228754v1_genomic.fna |
| 4457 | <i>Riemerella anatipestifer</i>           | GCA_900186945.1_48903_E01_genomic.fna   |
| 4458 | <i>Corynebacterium pseudotuberculosis</i> | GCA_000248375.1_ASM24837v1_genomic.fna  |
| 4459 | <i>Vibrio alginolyticus</i>               | GCA_002149065.1_ASM214906v1_genomic.fna |
| 4460 | <i>Lactobacillus paracasei</i>            | GCA_002442835.1_ASM244283v1_genomic.fna |
| 4461 | <i>Bacteroides dorei</i>                  | GCA_000738065.1_ASM73806v1_genomic.fna  |
| 4462 | <i>Granulibacter bethesdensis</i>         | GCA_001889545.1_ASM188954v1_genomic.fna |
| 4463 | <i>Streptococcus iniae</i>                | GCA_000403625.1_ASM40362v1_genomic.fna  |
| 4464 | <i>Aeromonas hydrophila</i>               | GCA_001019645.1_ASM101964v1_genomic.fna |
| 4465 | <i>Pseudomonas stutzeri</i>               | GCA_001648195.1_ASM164819v1_genomic.fna |
| 4466 | <i>Paenibacillus polymyxa</i>             | GCA_001922145.1_ASM192214v1_genomic.fna |
| 4467 | <i>Mycobacterium abscessus</i>            | GCA_001606195.1_ASM160619v1_genomic.fna |
| 4468 | <i>Bifidobacterium breve</i>              | GCA_001281425.1_ASM128142v1_genomic.fna |
| 4469 | <i>Enterobacter cloacae</i>               | GCA_001022015.1_ASM102201v1_genomic.fna |
| 4470 | <i>Citrobacter koseri</i>                 | GCA_002208985.1_ASM220898v1_genomic.fna |
| 4471 | <i>Proteus mirabilis</i>                  | GCA_002310895.1_ASM231089v1_genomic.fna |
| 4472 | <i>Campylobacter coli</i>                 | GCA_001717605.1_ASM171760v1_genomic.fna |
| 4473 | <i>Propionibacterium acnes</i>            | GCA_000376705.1_ASM37670v1_genomic.fna  |
| 4474 | <i>Mycoplasma gallisepticum</i>           | GCA_000286775.1_ASM28677v1_genomic.fna  |
| 4475 | <i>Serratia marcescens</i>                | GCA_002220515.1_ASM222051v1_genomic.fna |
| 4476 | <i>Lactobacillus brevis</i>               | GCA_002174235.1_ASM217423v1_genomic.fna |
| 4477 | <i>Mannheimia haemolytica</i>             | GCA_000963675.1_ASM96367v1_genomic.fna  |
| 4478 | <i>Leuconostoc mesenteroides</i>          | GCA_002148235.1_ASM214823v1_genomic.fna |
| 4479 | <i>Lactobacillus plantarum</i>            | GCA_001278015.1_ASM127801v1_genomic.fna |
| 4480 | <i>Dehalococcoides mccartyi</i>           | GCA_000830905.1_ASM83090v1_genomic.fna  |
| 4481 | <i>Yersinia enterocolitica</i>            | GCA_001708555.1_ASM170855v1_genomic.fna |
| 4482 | <i>Mycoplasma pneumoniae</i>              | GCA_001272735.1_ASM127273v1_genomic.fna |
| 4483 | <i>Corynebacterium diphtheriae</i>        | GCA_000255195.1_ASM25519v1_genomic.fna  |
| 4484 | <i>Haemophilus ducreyi</i>                | GCA_001647875.1_ASM164787v1_genomic.fna |
| 4485 | <i>Bordetella pertussis</i>               | GCA_001307605.1_ASM130760v1_genomic.fna |

|      |                                     |                                         |
|------|-------------------------------------|-----------------------------------------|
| 4486 | <i>Sinorhizobium meliloti</i>       | GCA_002197025.1_ASM219702v1_genomic.fna |
| 4487 | <i>Brucella melitensis</i>          | GCA_001715485.1_ASM171548v1_genomic.fna |
| 4488 | <i>Lactobacillus rhamnosus</i>      | GCA_002158925.1_ASM215892v1_genomic.fna |
| 4489 | <i>Pasteurella multocida</i>        | GCA_001663095.1_ASM166309v1_genomic.fna |
| 4490 | <i>Acetobacter pasteurianus</i>     | GCA_000241585.3_ASM24158v3_genomic.fna  |
| 4491 | <i>Stenotrophomonas maltophilia</i> | GCA_002208885.1_ASM220888v1_genomic.fna |
| 4492 | <i>Enterococcus faecium</i>         | GCA_001635875.1_ASM163587v1_genomic.fna |
| 4493 | <i>Neisseria gonorrhoeae</i>        | GCA_002073535.1_ASM207353v1_genomic.fna |
| 4494 | <i>Bacillus amyloliquefaciens</i>   | GCA_000835145.1_ASM83514v1_genomic.fna  |
| 4495 | <i>Bifidobacterium animalis</i>     | GCA_000277345.1_ASM27734v1_genomic.fna  |
| 4496 | <i>Chlamydia psittaci</i>           | GCA_000298475.2_ASM29847v2_genomic.fna  |
| 4497 | <i>Klebsiella pneumoniae</i>        | GCA_000406765.2_ASM40676v2_genomic.fna  |
| 4498 | <i>Enterococcus faecalis</i>        | GCA_001689055.2_ASM168905v2_genomic.fna |
| 4499 | <i>Brucella suis</i>                | GCA_000699025.1_ASM69902v1_genomic.fna  |
| 4500 | <i>Clostridium botulinum</i>        | GCA_000020345.1_ASM2034v1_genomic.fna   |
| 4501 | <i>Rickettsia prowazekii</i>        | GCA_001602215.1_ASM160221v1_genomic.fna |
| 4502 | <i>Burkholderia thailandensis</i>   | GCA_000959425.1_ASM95942v1_genomic.fna  |
| 4503 | <i>Mycoplasma mycoides</i>          | GCA_001554155.1_ASM155415v1_genomic.fna |
| 4504 | <i>Vibrio parahaemolyticus</i>      | GCA_001636035.1_ASM163603v1_genomic.fna |
| 4505 | <i>Rickettsia rickettsii</i>        | GCA_001950995.1_ASM195099v1_genomic.fna |
| 4506 | <i>Lactobacillus helveticus</i>     | GCA_001746265.2_ASM174626v2_genomic.fna |
| 4507 | <i>Bacillus subtilis</i>            | GCA_000344745.1_ASM34474v1_genomic.fna  |
| 4508 | <i>Coxiella burnetii</i>            | GCA_002109345.1_ASM210934v1_genomic.fna |
| 4509 | <i>Clostridioides difficile</i>     | GCA_002234355.1_ASM223435v1_genomic.fna |
| 4510 | <i>Xanthomonas oryzae</i>           | GCA_001042795.1_ASM104279v1_genomic.fna |
| 4511 | <i>Campylobacter fetus</i>          | GCA_001686885.1_ASM168688v1_genomic.fna |
| 4512 | <i>Xanthomonas citri</i>            | GCA_000961255.1_ASM96125v1_genomic.fna  |
| 4513 | <i>Lactobacillus delbrueckii</i>    | GCA_001888985.1_ASM188898v1_genomic.fna |
| 4514 | <i>Brucella abortus</i>             | GCA_000740295.1_ASM74029v1_genomic.fna  |
| 4515 | <i>Yersinia pseudotuberculosis</i>  | GCA_000834435.1_ASM83443v1_genomic.fna  |
| 4516 | <i>Francisella tularensis</i>       | GCA_000023305.1_ASM2330v1_genomic.fna   |
| 4517 | <i>Vibrio cholerae</i>              | GCA_000788715.2_ASM78871v2_genomic.fna  |
| 4518 | <i>Ralstonia solanacearum</i>       | GCA_001879565.1_ASM187956v1_genomic.fna |
| 4519 | <i>Bacillus thuringiensis</i>       | GCA_000306745.1_ASM30674v1_genomic.fna  |

|      |                                   |                                          |
|------|-----------------------------------|------------------------------------------|
| 4520 | <i>Burkholderia mallei</i>        | GCA_000762285.1_ASM76228v1_genomic.fna   |
| 4521 | <i>Burkholderia pseudomallei</i>  | GCA_000520895.1_ASM52089v1_genomic.fna   |
| 4522 | <i>Burkholderia cenocepacia</i>   | GCA_001606135.1_ASM160613v1_genomic.fna  |
| 4523 | <i>Chlamydia trachomatis</i>      | GCA_000092705.1_ASM9270v1_genomic.fna    |
| 4524 | <i>Corynebacterium glutamicum</i> | GCA_000828015.1_ASM82801v1_genomic.fna   |
| 4525 | <i>Bacillus pumilus</i>           | GCA_001700735.1_ASM170073v1_genomic.fna  |
| 4526 | <i>Streptococcus thermophilus</i> | GCA_001280285.1_ASM128028v1_genomic.fna  |
| 4527 | <i>Bacillus licheniformis</i>     | GCA_002173675.1_ASM217367v1_genomic.fna  |
| 4528 | <i>Legionella pneumophila</i>     | GCA_001590615.1_ASM159061v1_genomic.fna  |
| 4529 | <i>Pseudomonas aeruginosa</i>     | GCA_000414035.1_ASM41403v1_genomic.fna   |
| 4530 | <i>Acinetobacter baumannii</i>    | GCA_000302575.1_ASM30257v1_genomic.fna   |
| 4531 | <i>Streptococcus suis</i>         | GCA_000231905.1_ASM23190v1_genomic.fna   |
| 4532 | <i>Vibrio vulnificus</i>          | GCA_002117205.1_ASM211720v1_genomic.fna  |
| 4533 | <i>Bifidobacterium longum</i>     | GCA_000730205.1_ASM73020v1_genomic.fna   |
| 4534 | <i>Bacillus anthracis</i>         | GCA_000742655.1_ASM74265v1_genomic.fna   |
| 4535 | <i>Shigella flexneri</i>          | GCA_001580175.1_ASM158017v1_genomic.fna  |
| 4536 | <i>Streptococcus agalactiae</i>   | GCA_000730255.1_ASM73025v1_genomic.fna   |
| 4537 | <i>Pseudomonas syringae</i>       | GCA_001913215.1_ASM191321v1_genomic.fna  |
| 4538 | <i>Fusobacterium nucleatum</i>    | GCA_001457555.1_NCTC10562_genomic.fna    |
| 4539 | <i>Streptococcus pneumoniae</i>   | GCA_000019985.1_ASM1998v1_genomic.fna    |
| 4540 | <i>Streptococcus pyogenes</i>     | GCA_000013505.1_ASM1350v1_genomic.fna    |
| 4541 | <i>Xylella fastidiosa</i>         | GCA_001456275.1_ASM145627v1_genomic.fna  |
| 4542 | <i>Pseudomonas putida</i>         | GCA_000271965.2_ASM27196v2_genomic.fna   |
| 4543 | <i>Neisseria meningitidis</i>     | GCA_000191465.1_ASM19146v1_genomic.fna   |
| 4544 | <i>Buchnera aphidicola</i>        | GCA_900016785.1_BTsPazieg1.0_genomic.fna |
| 4545 | <i>Chlamydia pneumoniae</i>       | GCA_001007105.1_CV14_genomic.fna         |
| 4546 | <i>Helicobacter pylori</i>        | GCA_000093185.1_ASM9318v1_genomic.fna    |
| 4547 | <i>Escherichia coli</i>           | GCA_000010385.1_ASM1038v1_genomic.fna    |
| 4548 | <i>Haemophilus influenzae</i>     | GCA_000767075.1_ASM76707v1_genomic.fna   |
| 4549 | <i>Prochlorococcus marinus</i>    | GCA_000015685.1_ASM1568v1_genomic.fna    |
| 4550 | <i>Mycobacterium tuberculosis</i> | GCA_000224435.1_ASM22443v1_genomic.fna   |
| 4551 | <i>Mycobacterium bovis</i>        | GCA_001043255.1_ASM104325v1_genomic.fna  |
| 4552 | <i>Mycobacterium avium</i>        | GCA_000835265.1_ASM83526v1_genomic.fna   |
| 4553 | <i>Listeria monocytogenes</i>     | GCA_000168695.2_ASM16869v2_genomic.fna   |

|      |                                   |                                         |
|------|-----------------------------------|-----------------------------------------|
| 4554 | <i>Lactococcus lactis</i>         | GCA_000468955.1_ASM46895v1_genomic.fna  |
| 4555 | <i>Bacillus cereus</i>            | GCA_000143605.1_ASM14360v1_genomic.fna  |
| 4556 | <i>Staphylococcus aureus</i>      | GCA_000011525.1_ASM1152v1_genomic.fna   |
| 4557 | <i>Yersinia pestis</i>            | GCA_000022845.1_ASM2284v1_genomic.fna   |
| 4558 | <i>Pseudomonas fluorescens</i>    | GCA_001307155.1_ASM130715v1_genomic.fna |
| 4559 | <i>Campylobacter jejuni</i>       | GCA_000184205.1_ASM18420v1_genomic.fna  |
| 4560 | <i>Salmonella enterica</i>        | GCA_000018625.1_ASM1862v1_genomic.fna   |
| 4561 | <i>Salmonella enterica</i>        | GCA_000018705.1_ASM1870v1_genomic.fna   |
| 4562 | <i>Pseudomonas fluorescens</i>    | GCA_001307275.1_ASM130727v1_genomic.fna |
| 4563 | <i>Campylobacter jejuni</i>       | GCA_000302555.4_ASM30255v4_genomic.fna  |
| 4564 | <i>Yersinia pestis</i>            | GCA_000186725.1_ASM18672v1_genomic.fna  |
| 4565 | <i>Staphylococcus aureus</i>      | GCA_000012045.1_ASM1204v1_genomic.fna   |
| 4566 | <i>Bacillus cereus</i>            | GCA_000239195.1_ASM23919v1_genomic.fna  |
| 4567 | <i>Lactococcus lactis</i>         | GCA_000478255.2_ASM47825v2_genomic.fna  |
| 4568 | <i>Mycobacterium avium</i>        | GCA_001653355.1_ASM165335v1_genomic.fna |
| 4569 | <i>Mycobacterium bovis</i>        | GCA_001078615.1_ASM107861v1_genomic.fna |
| 4570 | <i>Mycobacterium tuberculosis</i> | GCA_000270365.1_ASM27036v1_genomic.fna  |
| 4571 | <i>Prochlorococcus marinus</i>    | GCA_000015965.1_ASM1596v1_genomic.fna   |
| 4572 | <i>Haemophilus influenzae</i>     | GCA_000931575.1_ASM93157v1_genomic.fna  |
| 4573 | <i>Escherichia coli</i>           | GCA_000010485.1_ASM1048v1_genomic.fna   |
| 4574 | <i>Helicobacter pylori</i>        | GCA_000148665.1_ASM14866v1_genomic.fna  |
| 4575 | <i>Chlamydia pneumoniae</i>       | GCA_001007125.1_CM1_genomic.fna         |
| 4576 | <i>Buchnera aphidicola</i>        | GCA_001648115.1_ASM164811v1_genomic.fna |
| 4577 | <i>Neisseria meningitidis</i>     | GCA_000191485.1_ASM19148v1_genomic.fna  |
| 4578 | <i>Xylella fastidiosa</i>         | GCA_001456295.1_ASM145629v1_genomic.fna |
| 4579 | <i>Pseudomonas putida</i>         | GCA_000325725.1_ASM32572v1_genomic.fna  |
| 4580 | <i>Streptococcus pyogenes</i>     | GCA_000013525.1_ASM1352v1_genomic.fna   |
| 4581 | <i>Streptococcus pneumoniae</i>   | GCA_000026665.1_ASM2666v1_genomic.fna   |
| 4582 | <i>Fusobacterium nucleatum</i>    | GCA_002211605.1_ASM221160v1_genomic.fna |
| 4583 | <i>Pseudomonas syringae</i>       | GCA_001913235.1_ASM191323v1_genomic.fna |
| 4584 | <i>Streptococcus agalactiae</i>   | GCA_000782855.1_ASM78285v1_genomic.fna  |
| 4585 | <i>Bacillus anthracis</i>         | GCA_000742895.1_ASM74289v1_genomic.fna  |
| 4586 | <i>Shigella flexneri</i>          | GCA_002240075.1_ASM224007v1_genomic.fna |
| 4587 | <i>Bifidobacterium longum</i>     | GCA_000772485.1_ASM77248v1_genomic.fna  |

|      |                                    |                                         |
|------|------------------------------------|-----------------------------------------|
| 4588 | <i>Vibrio vulnificus</i>           | GCA_002204915.1_ASM220491v1_genomic.fna |
| 4589 | <i>Streptococcus suis</i>          | GCA_000231925.1_ASM23192v1_genomic.fna  |
| 4590 | <i>Pseudomonas aeruginosa</i>      | GCA_000473745.3_ASM47374v3_genomic.fna  |
| 4591 | <i>Legionella pneumophila</i>      | GCA_001590645.1_ASM159064v1_genomic.fna |
| 4592 | <i>Bacillus licheniformis</i>      | GCA_002174255.1_ASM217425v1_genomic.fna |
| 4593 | <i>Acinetobacter baumannii</i>     | GCA_000419385.1_ASM41938v1_genomic.fna  |
| 4594 | <i>Streptococcus thermophilus</i>  | GCA_001514435.1_ASM151443v1_genomic.fna |
| 4595 | <i>Bacillus pumilus</i>            | GCA_001704975.1_ASM170497v1_genomic.fna |
| 4596 | <i>Chlamydia trachomatis</i>       | GCA_000092725.1_ASM9272v1_genomic.fna   |
| 4597 | <i>Corynebacterium glutamicum</i>  | GCA_001447865.2_ASM144786v2_genomic.fna |
| 4598 | <i>Burkholderia cenocepacia</i>    | GCA_001718895.1_ASM171889v1_genomic.fna |
| 4599 | <i>Burkholderia pseudomallei</i>   | GCA_000521645.1_ASM52164v1_genomic.fna  |
| 4600 | <i>Bacillus thuringiensis</i>      | GCA_000338755.1_ASM33875v1_genomic.fna  |
| 4601 | <i>Burkholderia mallei</i>         | GCA_000959165.1_ASM95916v1_genomic.fna  |
| 4602 | <i>Ralstonia solanacearum</i>      | GCA_001887535.1_ASM188753v1_genomic.fna |
| 4603 | <i>Vibrio cholerae</i>             | GCA_000829215.1_ASM82921v1_genomic.fna  |
| 4604 | <i>Francisella tularensis</i>      | GCA_000168775.2_ASM16877v2_genomic.fna  |
| 4605 | <i>Yersinia pseudotuberculosis</i> | GCA_000834475.1_ASM83447v1_genomic.fna  |
| 4606 | <i>Brucella abortus</i>            | GCA_000740315.1_ASM74031v1_genomic.fna  |
| 4607 | <i>Lactobacillus delbrueckii</i>   | GCA_001908415.1_ASM190841v1_genomic.fna |
| 4608 | <i>Xanthomonas citri</i>           | GCA_000961275.1_ASM96127v1_genomic.fna  |
| 4609 | <i>Xanthomonas oryzae</i>          | GCA_001042815.1_ASM104281v1_genomic.fna |
| 4610 | <i>Bacillus subtilis</i>           | GCA_000349795.1_ASM34979v1_genomic.fna  |
| 4611 | <i>Rickettsia rickettsii</i>       | GCA_001951015.1_ASM195101v1_genomic.fna |
| 4612 | <i>Vibrio parahaemolyticus</i>     | GCA_001682175.1_ASM168217v1_genomic.fna |
| 4613 | <i>Ureaplasma parvum</i>           | GCA_002205575.1_ASM220557v1_genomic.fna |
| 4614 | <i>Mycoplasma mycoides</i>         | GCA_001564435.1_ASM156443v1_genomic.fna |
| 4615 | <i>Burkholderia thailandensis</i>  | GCA_000959605.1_ASM95960v1_genomic.fna  |
| 4616 | <i>Clostridium botulinum</i>       | GCA_000022765.1_ASM2276v1_genomic.fna   |
| 4617 | <i>Brucella suis</i>               | GCA_000740235.1_ASM74023v1_genomic.fna  |
| 4618 | <i>Enterococcus faecalis</i>       | GCA_001878735.1_ASM187873v1_genomic.fna |
| 4619 | <i>Klebsiella pneumoniae</i>       | GCA_000417085.2_ASM41708v2_genomic.fna  |
| 4620 | <i>Chlamydia psittaci</i>          | GCA_000298495.2_ASM29849v2_genomic.fna  |
| 4621 | <i>Bifidobacterium animalis</i>    | GCA_000414215.1_ASM41421v1_genomic.fna  |



|      |                                           |                                         |
|------|-------------------------------------------|-----------------------------------------|
| 4622 | <i>Bacillus amyloliquefaciens</i>         | GCA_000973485.1_ASM97348v1_genomic.fna  |
| 4623 | <i>Neisseria gonorrhoeae</i>              | GCA_002073615.1_ASM207361v1_genomic.fna |
| 4624 | <i>Enterococcus faecium</i>               | GCA_001720945.1_ASM172094v1_genomic.fna |
| 4625 | <i>Stenotrophomonas maltophilia</i>       | GCA_900186865.1_49243_F02_genomic.fna   |
| 4626 | <i>Acetobacter pasteurianus</i>           | GCA_000723785.1_AP1_genomic.fna         |
| 4627 | <i>Pasteurella multocida</i>              | GCA_001721885.1_ASM172188v1_genomic.fna |
| 4628 | <i>Lactobacillus rhamnosus</i>            | GCA_002286235.1_ASM228623v1_genomic.fna |
| 4629 | <i>Brucella melitensis</i>                | GCA_002191235.1_ASM219123v1_genomic.fna |
| 4630 | <i>Sinorhizobium meliloti</i>             | GCA_002197045.1_ASM219704v1_genomic.fna |
| 4631 | <i>Bordetella pertussis</i>               | GCA_001307625.1_ASM130762v1_genomic.fna |
| 4632 | <i>Haemophilus ducreyi</i>                | GCA_001647895.1_ASM164789v1_genomic.fna |
| 4633 | <i>Corynebacterium diphtheriae</i>        | GCA_000255215.1_ASM25521v1_genomic.fna  |
| 4634 | <i>Mycoplasma pneumoniae</i>              | GCA_001272755.1_ASM127275v1_genomic.fna |
| 4635 | <i>Yersinia enterocolitica</i>            | GCA_001708575.1_ASM170857v1_genomic.fna |
| 4636 | <i>Dehalococcoides mccartyi</i>           | GCA_000830925.1_ASM83092v1_genomic.fna  |
| 4637 | <i>Lactobacillus plantarum</i>            | GCA_001296095.1_ASM129609v1_genomic.fna |
| 4638 | <i>Leuconostoc mesenteroides</i>          | GCA_002370395.1_ASM237039v1_genomic.fna |
| 4639 | <i>Mannheimia haemolytica</i>             | GCA_002285575.1_ASM228557v1_genomic.fna |
| 4640 | <i>Serratia marcescens</i>                | GCA_002220535.1_ASM222053v1_genomic.fna |
| 4641 | <i>Mycoplasma gallisepticum</i>           | GCA_000286795.1_ASM28679v1_genomic.fna  |
| 4642 | <i>Propionibacterium acnes</i>            | GCA_000709495.1_ASM70949v1_genomic.fna  |
| 4643 | <i>Campylobacter coli</i>                 | GCA_001865455.1_ASM186545v1_genomic.fna |
| 4644 | <i>Enterobacter cloacae</i>               | GCA_001022055.1_ASM102205v1_genomic.fna |
| 4645 | <i>Bifidobacterium breve</i>              | GCA_001990225.1_ASM199022v1_genomic.fna |
| 4646 | <i>Mycobacterium abscessus</i>            | GCA_001606215.1_ASM160621v1_genomic.fna |
| 4647 | <i>Aeromonas hydrophila</i>               | GCA_001455365.1_ASM145536v1_genomic.fna |
| 4648 | <i>Streptococcus iniae</i>                | GCA_000648525.1_ASM64852v1_genomic.fna  |
| 4649 | <i>Bacteroides dorei</i>                  | GCA_001274835.1_ASM127483v1_genomic.fna |
| 4650 | <i>Vibrio alginolyticus</i>               | GCA_002149085.1_ASM214908v1_genomic.fna |
| 4651 | <i>Corynebacterium pseudotuberculosis</i> | GCA_000255935.1_ASM25593v1_genomic.fna  |
| 4652 | <i>Vibrio anguillarum</i>                 | GCA_002291265.1_ASM229126v1_genomic.fna |
| 4653 | <i>Corynebacterium ulcerans</i>           | GCA_002162115.1_ASM216211v1_genomic.fna |
| 4654 | <i>Rickettsia japonica</i>                | GCA_002357275.1_ASM235727v1_genomic.fna |
| 4655 | <i>Piscirickettsia salmonis</i>           | GCA_001932795.1_ASM193279v1_genomic.fna |

|      |                                           |                                         |
|------|-------------------------------------------|-----------------------------------------|
| 4656 | <i>Elizabethkingia anophelis</i>          | GCA_002024825.1_ASM202482v1_genomic.fna |
| 4657 | <i>Rhizobium phaseoli</i>                 | GCA_001664385.1_ASM166438v1_genomic.fna |
| 4658 | <i>Bacillus velezensis</i>                | GCA_000769555.1_ASM76955v1_genomic.fna  |
| 4659 | <i>Alteromonas mediterranea</i>           | GCA_001886435.1_ASM188643v1_genomic.fna |
| 4660 | <i>Alteromonas mediterranea</i>           | GCA_001886455.1_ASM188645v1_genomic.fna |
| 4661 | <i>Bacillus velezensis</i>                | GCA_000973585.1_ASM97358v1_genomic.fna  |
| 4662 | <i>Rhizobium phaseoli</i>                 | GCA_001664405.1_ASM166440v1_genomic.fna |
| 4663 | <i>Elizabethkingia anophelis</i>          | GCA_002277995.1_ASM227799v1_genomic.fna |
| 4664 | <i>Piscirickettsia salmonis</i>           | GCA_001932815.1_ASM193281v1_genomic.fna |
| 4665 | <i>Rickettsia japonica</i>                | GCA_002357295.1_ASM235729v1_genomic.fna |
| 4666 | <i>Corynebacterium ulcerans</i>           | GCA_900187135.1_51485_C02_genomic.fna   |
| 4667 | <i>Vibrio anguillarum</i>                 | GCA_002310335.1_ASM231033v1_genomic.fna |
| 4668 | <i>Corynebacterium pseudotuberculosis</i> | GCA_000258385.1_ASM25838v1_genomic.fna  |
| 4669 | <i>Vibrio alginolyticus</i>               | GCA_002149105.1_ASM214910v1_genomic.fna |
| 4670 | <i>Streptococcus iniae</i>                | GCA_000648555.1_ASM64855v1_genomic.fna  |
| 4671 | <i>Aeromonas hydrophila</i>               | GCA_001518775.1_ASM151877v1_genomic.fna |
| 4672 | <i>Mycobacterium abscessus</i>            | GCA_001606235.1_ASM160623v1_genomic.fna |
| 4673 | <i>Enterobacter cloacae</i>               | GCA_001022075.1_ASM102207v1_genomic.fna |
| 4674 | <i>Campylobacter coli</i>                 | GCA_001865475.1_ASM186547v1_genomic.fna |
| 4675 | <i>Cutibacterium acnes</i>                | GCA_001281065.1_ASM128106v1_genomic.fna |
| 4676 | <i>Mycoplasma gallisepticum</i>           | GCA_000286815.1_ASM28681v1_genomic.fna  |
| 4677 | <i>Serratia marcescens</i>                | GCA_002220555.1_ASM222055v1_genomic.fna |
| 4678 | <i>Mannheimia haemolytica</i>             | GCA_002285595.1_ASM228559v1_genomic.fna |
| 4679 | <i>Leuconostoc mesenteroides</i>          | GCA_002370415.1_ASM237041v1_genomic.fna |
| 4680 | <i>Lactobacillus plantarum</i>            | GCA_001302645.1_ASM130264v1_genomic.fna |
| 4681 | <i>Dehalococcoides mccartyi</i>           | GCA_001547795.1_ASM154779v1_genomic.fna |
| 4682 | <i>Yersinia enterocolitica</i>            | GCA_001708595.1_ASM170859v1_genomic.fna |
| 4683 | <i>Mycoplasma pneumoniae</i>              | GCA_001272775.1_ASM127277v1_genomic.fna |
| 4684 | <i>Corynebacterium diphtheriae</i>        | GCA_000255235.1_ASM25523v1_genomic.fna  |
| 4685 | <i>Haemophilus ducreyi</i>                | GCA_001647915.1_ASM164791v1_genomic.fna |
| 4686 | <i>Bordetella pertussis</i>               | GCA_001307645.1_ASM130764v1_genomic.fna |
| 4687 | <i>Sinorhizobium meliloti</i>             | GCA_002197065.1_ASM219706v1_genomic.fna |
| 4688 | <i>Brucella melitensis</i>                | GCA_002191295.1_ASM219129v1_genomic.fna |
| 4689 | <i>Lactobacillus rhamnosus</i>            | GCA_002287945.1_ASM228794v1_genomic.fna |

|      |                                    |                                         |
|------|------------------------------------|-----------------------------------------|
| 4690 | <i>Pasteurella multocida</i>       | GCA_001874445.1_ASM187444v1_genomic.fna |
| 4691 | <i>Acetobacter pasteurianus</i>    | GCA_001183745.1_ASM118374v1_genomic.fna |
| 4692 | <i>Enterococcus faecium</i>        | GCA_001721065.1_ASM172106v1_genomic.fna |
| 4693 | <i>Neisseria gonorrhoeae</i>       | GCA_002073655.1_ASM207365v1_genomic.fna |
| 4694 | <i>Bacillus amyloliquefaciens</i>  | GCA_001483885.1_ASM148388v1_genomic.fna |
| 4695 | <i>Bifidobacterium animalis</i>    | GCA_000471945.1_ASM47194v1_genomic.fna  |
| 4696 | <i>Chlamydia psittaci</i>          | GCA_000298515.2_ASM29851v2_genomic.fna  |
| 4697 | <i>Klebsiella pneumoniae</i>       | GCA_000417225.2_ASM41722v2_genomic.fna  |
| 4698 | <i>Enterococcus faecalis</i>       | GCA_001886675.1_ASM188667v1_genomic.fna |
| 4699 | <i>Brucella suis</i>               | GCA_000740255.1_ASM74025v1_genomic.fna  |
| 4700 | <i>Clostridium botulinum</i>       | GCA_000092345.1_ASM9234v1_genomic.fna   |
| 4701 | <i>Burkholderia thailandensis</i>  | GCA_001718295.1_ASM171829v1_genomic.fna |
| 4702 | <i>Vibrio parahaemolyticus</i>     | GCA_001700835.1_ASM170083v1_genomic.fna |
| 4703 | <i>Ralstonia pickettii</i>         | GCA_000471925.1_ASM47192v1_genomic.fna  |
| 4704 | <i>Bacillus subtilis</i>           | GCA_000497485.1_ASM49748v1_genomic.fna  |
| 4705 | <i>Xanthomonas oryzae</i>          | GCA_001042835.1_ASM104283v1_genomic.fna |
| 4706 | <i>Xanthomonas citri</i>           | GCA_000961295.1_ASM96129v1_genomic.fna  |
| 4707 | <i>Lactobacillus delbrueckii</i>   | GCA_001953135.1_ASM195313v1_genomic.fna |
| 4708 | <i>Brucella abortus</i>            | GCA_000740375.1_ASM74037v1_genomic.fna  |
| 4709 | <i>Yersinia pseudotuberculosis</i> | GCA_000834945.1_ASM83494v1_genomic.fna  |
| 4710 | <i>Francisella</i> cf.             | GCA_000195535.1_ASM19553v1_genomic.fna  |
| 4711 | <i>Vibrio cholerae</i>             | GCA_000963555.1_ASM96355v1_genomic.fna  |
| 4712 | <i>Ralstonia solanacearum</i>      | GCA_001891105.1_ASM189110v1_genomic.fna |
| 4713 | <i>Burkholderia mallei</i>         | GCA_000959405.1_ASM95940v1_genomic.fna  |
| 4714 | <i>Bacillus thuringiensis</i>      | GCA_000341665.1_ASM34166v1_genomic.fna  |
| 4715 | <i>Burkholderia pseudomallei</i>   | GCA_000583835.1_ASM58383v1_genomic.fna  |
| 4716 | <i>Burkholderia cenocepacia</i>    | GCA_001999785.1_ASM199978v1_genomic.fna |
| 4717 | <i>Chlamydia trachomatis</i>       | GCA_000092745.1_ASM9274v1_genomic.fna   |
| 4718 | <i>Bacillus pumilus</i>            | GCA_001908475.1_ASM190847v1_genomic.fna |
| 4719 | <i>Corynebacterium glutamicum</i>  | GCA_001518935.2_ASM151893v2_genomic.fna |
| 4720 | <i>Streptococcus thermophilus</i>  | GCA_001663795.1_ASM166379v1_genomic.fna |
| 4721 | <i>Acinetobacter baumannii</i>     | GCA_000419405.1_ASM41940v1_genomic.fna  |
| 4722 | <i>Bacillus licheniformis</i>      | GCA_002236895.1_ASM223689v1_genomic.fna |
| 4723 | <i>Legionella pneumophila</i>      | GCA_001590695.1_ASM159069v1_genomic.fna |

|      |                                   |                                         |
|------|-----------------------------------|-----------------------------------------|
| 4724 | <i>Pseudomonas aeruginosa</i>     | GCA_000496455.2_ASM49645v2_genomic.fna  |
| 4725 | <i>Streptococcus suis</i>         | GCA_000233575.1_ASM23357v1_genomic.fna  |
| 4726 | <i>Vibrio vulnificus</i>          | GCA_002224265.1_ASM222426v1_genomic.fna |
| 4727 | <i>Bifidobacterium longum</i>     | GCA_000829295.1_ASM82929v1_genomic.fna  |
| 4728 | <i>Shigella flexneri</i>          | GCA_002240095.1_ASM224009v1_genomic.fna |
| 4729 | <i>Pseudomonas syringae</i>       | GCA_002024285.1_ASM202428v1_genomic.fna |
| 4730 | <i>Bacillus anthracis</i>         | GCA_000830095.1_ASM83009v1_genomic.fna  |
| 4731 | <i>Streptococcus agalactiae</i>   | GCA_000831105.1_ASM83110v1_genomic.fna  |
| 4732 | <i>Fusobacterium nucleatum</i>    | GCA_002211625.1_ASM221162v1_genomic.fna |
| 4733 | <i>Streptococcus pyogenes</i>     | GCA_000013545.1_ASM1354v1_genomic.fna   |
| 4734 | <i>Streptococcus pneumoniae</i>   | GCA_000146975.1_ASM14697v1_genomic.fna  |
| 4735 | <i>Pseudomonas putida</i>         | GCA_000410575.1_ASM41057v1_genomic.fna  |
| 4736 | <i>Xylella fastidiosa</i>         | GCA_001456315.1_ASM145631v1_genomic.fna |
| 4737 | <i>Neisseria meningitidis</i>     | GCA_000191505.1_ASM19150v1_genomic.fna  |
| 4738 | <i>Buchnera aphidicola</i>        | GCA_001700895.1_ASM170089v1_genomic.fna |
| 4739 | <i>Chlamydia pneumoniae</i>       | GCA_001007145.1_PB2_genomic.fna         |
| 4740 | <i>Helicobacter pylori</i>        | GCA_000148855.1_ASM14885v1_genomic.fna  |
| 4741 | <i>Escherichia coli</i>           | GCA_000010745.1_ASM1074v1_genomic.fna   |
| 4742 | <i>Haemophilus influenzae</i>     | GCA_000931605.1_ASM93160v1_genomic.fna  |
| 4743 | <i>Prochlorococcus marinus</i>    | GCA_000018065.1_ASM1806v1_genomic.fna   |
| 4744 | <i>Mycobacterium tuberculosis</i> | GCA_000277735.2_ASM27773v2_genomic.fna  |
| 4745 | <i>Mycobacterium bovis</i>        | GCA_001274555.1_ASM127455v1_genomic.fna |
| 4746 | <i>Mycobacterium avium</i>        | GCA_001683455.1_ASM168345v1_genomic.fna |
| 4747 | <i>Listeria monocytogenes</i>     | GCA_000195435.4_ASM19543v4_genomic.fna  |
| 4748 | <i>Lactococcus lactis</i>         | GCA_000479375.2_ASM47937v2_genomic.fna  |
| 4749 | <i>Bacillus cereus</i>            | GCA_000283675.1_ASM28367v1_genomic.fna  |
| 4750 | <i>Staphylococcus aureus</i>      | GCA_000013465.1_ASM1346v1_genomic.fna   |
| 4751 | <i>Yersinia pestis</i>            | GCA_000222975.1_ASM22297v1_genomic.fna  |
| 4752 | <i>Pseudomonas fluorescens</i>    | GCA_001612705.1_ASM161270v1_genomic.fna |
| 4753 | <i>Campylobacter jejuni</i>       | GCA_000304375.1_AINO_genomic.fna        |
| 4754 | <i>Salmonella enterica</i>        | GCA_000020705.1_ASM2070v1_genomic.fna   |
| 4755 | <i>Salmonella enterica</i>        | GCA_000020745.1_ASM2074v1_genomic.fna   |
| 4756 | <i>Pseudomonas fluorescens</i>    | GCA_001708445.1_ASM170844v1_genomic.fna |
| 4757 | <i>Campylobacter jejuni</i>       | GCA_000430385.1_ASM43038v1_genomic.fna  |

|      |                                   |                                                      |
|------|-----------------------------------|------------------------------------------------------|
| 4758 | <i>Yersinia pestis</i>            | GCA_000834235.1_ASM83423v1_genomic.fna               |
| 4759 | <i>Staphylococcus aureus</i>      | GCA_000016805.1_ASM1680v1_genomic.fna                |
| 4760 | <i>Bacillus cereus</i>            | GCA_000292415.1_ASM29241v1_genomic.fna               |
| 4761 | <i>Lactococcus lactis</i>         | GCA_000761115.1_ASM76111v1_genomic.fna               |
| 4762 | <i>Listeria monocytogenes</i>     | GCA_000197755.2_ASM19775v2_genomic.fna               |
| 4763 | <i>Mycobacterium avium</i>        | GCA_001865635.1_ASM186563v1_genomic.fna              |
| 4764 | <i>Mycobacterium bovis</i>        | GCA_001483905.1_ASM148390v1_genomic.fna              |
| 4765 | <i>Mycobacterium tuberculosis</i> | GCA_000331445.1_ASM33144v1_genomic.fna               |
| 4766 | <i>Haemophilus influenzae</i>     | GCA_000931625.1_ASM93162v1_genomic.fna               |
| 4767 | <i>Escherichia coli</i>           | GCA_000010765.1_ASM1076v1_genomic.fna                |
| 4768 | <i>Helicobacter pylori</i>        | GCA_000148875.1_ASM14887v1_genomic.fna               |
| 4769 | <i>Buchnera aphidicola</i>        | GCA_900128595.1_BCipseudotaxifoliae_v1.0_genomic.fna |
| 4770 | <i>Neisseria meningitidis</i>     | GCA_000191525.1_ASM19152v1_genomic.fna               |
| 4771 | <i>Xylella fastidiosa</i>         | GCA_001456335.2_ASM145633v2_genomic.fna              |
| 4772 | <i>Pseudomonas putida</i>         | GCA_000412675.1_ASM41267v1_genomic.fna               |
| 4773 | <i>Streptococcus pneumoniae</i>   | GCA_000147095.1_ASM14709v1_genomic.fna               |
| 4774 | <i>Streptococcus pyogenes</i>     | GCA_000018125.1_ASM1812v1_genomic.fna                |
| 4775 | <i>Streptococcus agalactiae</i>   | GCA_000831125.1_ASM83112v1_genomic.fna               |
| 4776 | <i>Bacillus anthracis</i>         | GCA_000832425.1_ASM83242v1_genomic.fna               |
| 4777 | <i>Pseudomonas syringae</i>       | GCA_002024305.1_ASM202430v1_genomic.fna              |
| 4778 | <i>Bifidobacterium longum</i>     | GCA_001051015.2_ASM105101v2_genomic.fna              |
| 4779 | <i>Shigella flexneri</i>          | GCA_002240115.1_ASM224011v1_genomic.fna              |
| 4780 | <i>Streptococcus suis</i>         | GCA_000294495.1_ASM29449v1_genomic.fna               |
| 4781 | <i>Pseudomonas aeruginosa</i>     | GCA_000496605.2_ASM49660v2_genomic.fna               |
| 4782 | <i>Legionella pneumophila</i>     | GCA_001592705.1_ASM159270v1_genomic.fna              |
| 4783 | <i>Shigella dysenteriae</i>       | GCA_000497505.1_ASM49750v1_genomic.fna               |
| 4784 | <i>Bacillus licheniformis</i>     | GCA_002504325.1_ASM250432v1_genomic.fna              |
| 4785 | <i>Acinetobacter baumannii</i>    | GCA_000419425.1_ASM41942v1_genomic.fna               |
| 4786 | <i>Streptococcus thermophilus</i> | GCA_001685375.1_ASM168537v1_genomic.fna              |
| 4787 | <i>Corynebacterium glutamicum</i> | GCA_001643035.1_ASM164303v1_genomic.fna              |
| 4788 | <i>Bacillus pumilus</i>           | GCA_900186955.1_49386_E02_genomic.fna                |
| 4789 | <i>Chlamydia trachomatis</i>      | GCA_000092805.1_ASM9280v1_genomic.fna                |
| 4790 | <i>Burkholderia cenocepacia</i>   | GCA_001999825.1_ASM199982v1_genomic.fna              |
| 4791 | <i>Burkholderia pseudomallei</i>  | GCA_000755765.1_ASM75576v1_genomic.fna               |

|      |                                    |                                                               |
|------|------------------------------------|---------------------------------------------------------------|
| 4792 | <i>Bacillus thuringiensis</i>      | GCA_000688795.1_ASM68879v1_genomic.fna                        |
| 4793 | <i>Burkholderia mallei</i>         | GCA_000959465.1_ASM95946v1_genomic.fna                        |
| 4794 | <i>Ralstonia solanacearum</i>      | GCA_002155245.1_ASM215524v1_genomic.fna                       |
| 4795 | <i>Vibrio cholerae</i>             | GCA_000969235.1_ASM96923v1_genomic.fna                        |
| 4796 | <i>Francisella</i> cf.             | GCA_000195555.1_ASM19555v1_genomic.fna                        |
| 4797 | <i>Yersinia pseudotuberculosis</i> | GCA_900092345.1_YP4713_genomic.fna                            |
| 4798 | <i>Lactobacillus delbrueckii</i>   | GCA_002000885.1_ASM200088v1_genomic.fna                       |
| 4799 | <i>Brucella abortus</i>            | GCA_001043295.1_ASM104329v1_genomic.fna                       |
| 4800 | <i>Xanthomonas citri</i>           | GCA_000961315.1_ASM96131v1_genomic.fna                        |
| 4801 | <i>Xanthomonas oryzae</i>          | GCA_001042855.1_ASM104285v1_genomic.fna                       |
| 4802 | <i>Bacillus subtilis</i>           | GCA_000523045.1_ASM52304v1_genomic.fna                        |
| 4803 | <i>Vibrio parahaemolyticus</i>     | GCA_001758605.1_ASM175860v1_genomic.fna                       |
| 4804 | <i>Burkholderia thailandensis</i>  | GCA_001718595.1_ASM171859v1_genomic.fna                       |
| 4805 | <i>Clostridium botulinum</i>       | GCA_000253195.1_ASM25319v1_genomic.fna                        |
| 4806 | <i>Brucella suis</i>               | GCA_000740435.1_ASM74043v1_genomic.fna                        |
| 4807 | <i>Enterococcus faecalis</i>       | GCA_001989555.1_ASM198955v1_genomic.fna                       |
| 4808 | <i>Klebsiella pneumoniae</i>       | GCA_000417265.2_ASM41726v2_genomic.fna                        |
| 4809 | <i>Chlamydia psittaci</i>          | GCA_000298535.2_ASM29853v2_genomic.fna                        |
| 4810 | <i>Bacillus amyloliquefaciens</i>  | GCA_001586105.1_ASM158610v1_genomic.fna                       |
| 4811 | <i>Bifidobacterium animalis</i>    | GCA_000695895.1_ASM69589v1_genomic.fna                        |
| 4812 | <i>Neisseria gonorrhoeae</i>       | GCA_900186875.1_49677_F01_genomic.fna                         |
| 4813 | <i>Enterococcus faecium</i>        | GCA_001721905.1_ASM172190v1_genomic.fna                       |
| 4814 | <i>Acetobacter pasteurianus</i>    | GCA_001766255.1_ASM176625v1_genomic.fna                       |
| 4815 | <i>Pasteurella multocida</i>       | GCA_001956795.1_ASM195679v1_genomic.fna                       |
| 4816 | <i>Lactobacillus rhamnosus</i>     | GCA_900070175.1_Lactobacillus_rhamnosus_CECT_8800_genomic.fna |
| 4817 | <i>Brucella melitensis</i>         | GCA_002191335.1_ASM219133v1_genomic.fna                       |
| 4818 | <i>Sinorhizobium meliloti</i>      | GCA_002197085.1_ASM219708v1_genomic.fna                       |
| 4819 | <i>Bordetella pertussis</i>        | GCA_001307665.1_ASM130766v1_genomic.fna                       |
| 4820 | <i>Haemophilus ducreyi</i>         | GCA_002208665.1_ASM220866v1_genomic.fna                       |
| 4821 | <i>Corynebacterium diphtheriae</i> | GCA_000255255.1_ASM25525v1_genomic.fna                        |
| 4822 | <i>Mycoplasma pneumoniae</i>       | GCA_001272795.1_ASM127279v1_genomic.fna                       |
| 4823 | <i>Yersinia enterocolitica</i>     | GCA_001708615.1_ASM170861v1_genomic.fna                       |
| 4824 | <i>Dehalococcoides mccartyi</i>    | GCA_001610775.1_ASM161077v1_genomic.fna                       |
| 4825 | <i>Lactobacillus plantarum</i>     | GCA_001484005.1_ASM148400v1_genomic.fna                       |

|      |                                           |                                         |
|------|-------------------------------------------|-----------------------------------------|
| 4826 | <i>Mannheimia haemolytica</i>             | GCA_002285615.1_ASM228561v1_genomic.fna |
| 4827 | <i>Serratia marcescens</i>                | GCA_002220575.1_ASM222057v1_genomic.fna |
| 4828 | <i>Cutibacterium acnes</i>                | GCA_001469565.1_ASM146956v1_genomic.fna |
| 4829 | <i>Campylobacter coli</i>                 | GCA_001865495.1_ASM186549v1_genomic.fna |
| 4830 | <i>Enterobacter cloacae</i>               | GCA_001022255.1_ASM102225v1_genomic.fna |
| 4831 | <i>Mycobacterium abscessus</i>            | GCA_001606255.1_ASM160625v1_genomic.fna |
| 4832 | <i>Aeromonas hydrophila</i>               | GCA_001683535.1_ASM168353v1_genomic.fna |
| 4833 | <i>Corynebacterium pseudotuberculosis</i> | GCA_000259155.3_ASM25915v3_genomic.fna  |
| 4834 | <i>Piscirickettsia salmonis</i>           | GCA_001932835.1_ASM193283v1_genomic.fna |
| 4835 | <i>Elizabethkingia anophelis</i>          | GCA_002310515.1_ASM231051v1_genomic.fna |
| 4836 | <i>Rhizobium phaseoli</i>                 | GCA_001664425.1_ASM166442v1_genomic.fna |
| 4837 | <i>Bacillus velezensis</i>                | GCA_000987825.1_ASM98782v1_genomic.fna  |
| 4838 | <i>Alteromonas mediterranea</i>           | GCA_000439475.1_ASM43947v1_genomic.fna  |
| 4839 | <i>Alteromonas mediterranea</i>           | GCA_001562295.1_ASM156229v1_genomic.fna |
| 4840 | <i>Bacillus velezensis</i>                | GCA_000988345.1_ASM98834v1_genomic.fna  |
| 4841 | <i>Rhizobium phaseoli</i>                 | GCA_001664445.1_ASM166444v1_genomic.fna |
| 4842 | <i>Elizabethkingia anophelis</i>          | GCA_002310535.1_ASM231053v1_genomic.fna |
| 4843 | <i>Piscirickettsia salmonis</i>           | GCA_001932855.1_ASM193285v1_genomic.fna |
| 4844 | <i>Corynebacterium pseudotuberculosis</i> | GCA_000263755.2_ASM26375v2_genomic.fna  |
| 4845 | <i>Streptococcus intermedius</i>          | GCA_001296205.1_ASM129620v1_genomic.fna |
| 4846 | <i>Aeromonas hydrophila</i>               | GCA_001687125.1_ASM168712v1_genomic.fna |
| 4847 | <i>Mycobacterium abscessus</i>            | GCA_001606275.1_ASM160627v1_genomic.fna |
| 4848 | <i>Enterobacter cloacae</i>               | GCA_001029645.1_ASM102964v1_genomic.fna |
| 4849 | <i>Campylobacter coli</i>                 | GCA_001865515.1_ASM186551v1_genomic.fna |
| 4850 | <i>Cutibacterium acnes</i>                | GCA_001469595.1_ASM146959v1_genomic.fna |
| 4851 | <i>Serratia marcescens</i>                | GCA_002220595.1_ASM222059v1_genomic.fna |
| 4852 | <i>Mannheimia haemolytica</i>             | GCA_002285815.1_ASM228581v1_genomic.fna |
| 4853 | <i>Bartonella quintana</i>                | GCA_000294715.1_ASM29471v1_genomic.fna  |
| 4854 | <i>Lactobacillus plantarum</i>            | GCA_001581895.1_ASM158189v1_genomic.fna |
| 4855 | <i>Dehalococcoides mccartyi</i>           | GCA_001889305.1_ASM188930v1_genomic.fna |
| 4856 | <i>Yersinia enterocolitica</i>            | GCA_001708635.1_ASM170863v1_genomic.fna |
| 4857 | <i>Mycoplasma pneumoniae</i>              | GCA_001272815.1_ASM127281v1_genomic.fna |
| 4858 | <i>Corynebacterium diphtheriae</i>        | GCA_000255275.1_ASM25527v1_genomic.fna  |
| 4859 | <i>Bordetella pertussis</i>               | GCA_001307685.1_ASM130768v1_genomic.fna |

|      |                                   |                                         |
|------|-----------------------------------|-----------------------------------------|
| 4860 | <i>Sinorhizobium meliloti</i>     | GCA_002197105.1_ASM219710v1_genomic.fna |
| 4861 | <i>Brucella melitensis</i>        | GCA_002191355.1_ASM219135v1_genomic.fna |
| 4862 | <i>Pasteurella multocida</i>      | GCA_002059225.1_ASM205922v1_genomic.fna |
| 4863 | <i>Acetobacter pasteurianus</i>   | GCA_002173735.1_ASM217373v1_genomic.fna |
| 4864 | <i>Enterococcus faecium</i>       | GCA_001750885.1_ASM175088v1_genomic.fna |
| 4865 | <i>Neisseria gonorrhoeae</i>      | GCA_900186915.1_49699_A01_genomic.fna   |
| 4866 | <i>Bifidobacterium animalis</i>   | GCA_000816205.1_ASM81620v1_genomic.fna  |
| 4867 | <i>Bacillus amyloliquefaciens</i> | GCA_001593765.1_ASM159376v1_genomic.fna |
| 4868 | <i>Chlamydia psittaci</i>         | GCA_000298555.2_ASM29855v2_genomic.fna  |
| 4869 | <i>Klebsiella pneumoniae</i>      | GCA_000445405.1_ASM44540v1_genomic.fna  |
| 4870 | <i>Enterococcus faecalis</i>      | GCA_002163735.1_ASM216373v1_genomic.fna |
| 4871 | <i>Brucella suis</i>              | GCA_000875695.1_ASM87569v1_genomic.fna  |
| 4872 | <i>Clostridium botulinum</i>      | GCA_000307125.1_ASM30712v1_genomic.fna  |
| 4873 | <i>Burkholderia thailandensis</i> | GCA_001718615.1_ASM171861v1_genomic.fna |
| 4874 | <i>Vibrio parahaemolyticus</i>    | GCA_001879585.1_ASM187958v1_genomic.fna |
| 4875 | <i>Bacillus subtilis</i>          | GCA_000699465.1_ASM69946v1_genomic.fna  |
| 4876 | <i>Xanthomonas oryzae</i>         | GCA_001042875.1_ASM104287v1_genomic.fna |
| 4877 | <i>Xanthomonas citri</i>          | GCA_000961335.1_ASM96133v1_genomic.fna  |
| 4878 | <i>Brucella abortus</i>           | GCA_001296965.1_ASM129696v1_genomic.fna |
| 4879 | <i>Lactobacillus delbrueckii</i>  | GCA_002142575.1_ASM214257v1_genomic.fna |
| 4880 | <i>Francisella tularensis</i>     | GCA_000248415.1_ASM24841v1_genomic.fna  |
| 4881 | <i>Vibrio cholerae</i>            | GCA_000969265.1_ASM96926v1_genomic.fna  |
| 4882 | <i>Ralstonia solanacearum</i>     | GCA_002162015.1_ASM216201v1_genomic.fna |
| 4883 | <i>Burkholderia mallei</i>        | GCA_000959485.1_ASM95948v1_genomic.fna  |
| 4884 | <i>Bacillus thuringiensis</i>     | GCA_000717535.1_ASM71753v1_genomic.fna  |
| 4885 | <i>Burkholderia pseudomallei</i>  | GCA_000755825.1_ASM75582v1_genomic.fna  |
| 4886 | <i>Burkholderia cenocepacia</i>   | GCA_001999885.1_ASM199988v1_genomic.fna |
| 4887 | <i>Chlamydia trachomatis</i>      | GCA_000093005.1_ASM9300v1_genomic.fna   |
| 4888 | <i>Corynebacterium glutamicum</i> | GCA_001683115.1_ASM168311v1_genomic.fna |
| 4889 | <i>Streptococcus thermophilus</i> | GCA_001705585.1_ASM170558v1_genomic.fna |
| 4890 | <i>Acinetobacter baumannii</i>    | GCA_000498375.2_ASM49837v2_genomic.fna  |
| 4891 | <i>Legionella pneumophila</i>     | GCA_001610735.1_ASM161073v1_genomic.fna |
| 4892 | <i>Pseudomonas aeruginosa</i>     | GCA_000496645.1_ASM49664v1_genomic.fna  |
| 4893 | <i>Streptococcus suis</i>         | GCA_000344765.1_ASM34476v1_genomic.fna  |



|      |                                   |                                              |
|------|-----------------------------------|----------------------------------------------|
| 4894 | <i>Shigella flexneri</i>          | GCA_002240135.1_ASM224013v1_genomic.fna      |
| 4895 | <i>Bifidobacterium longum</i>     | GCA_001281305.1_ASM128130v1_genomic.fna      |
| 4896 | <i>Bacillus anthracis</i>         | GCA_000832445.1_ASM83244v1_genomic.fna       |
| 4897 | <i>Streptococcus agalactiae</i>   | GCA_000831145.1_ASM83114v1_genomic.fna       |
| 4898 | <i>Streptococcus pneumoniae</i>   | GCA_000180515.2_ASM18051v2_genomic.fna       |
| 4899 | <i>Streptococcus pyogenes</i>     | GCA_000230295.1_ASM23029v1_genomic.fna       |
| 4900 | <i>Xylella fastidiosa</i>         | GCA_002117875.1_ASM211787v1_genomic.fna      |
| 4901 | <i>Pseudomonas putida</i>         | GCA_000495455.2_ASM49545v2_genomic.fna       |
| 4902 | <i>Neisseria meningitidis</i>     | GCA_000253215.1_ASM25321v1_genomic.fna       |
| 4903 | <i>Buchnera aphidicola</i>        | GCA_900128735.1_BCiconfinis_v1.0_genomic.fna |
| 4904 | <i>Helicobacter pylori</i>        | GCA_000148895.1_ASM14889v1_genomic.fna       |
| 4905 | <i>Escherichia coli</i>           | GCA_000013265.1_ASM1326v1_genomic.fna        |
| 4906 | <i>Haemophilus influenzae</i>     | GCA_000968335.1_ASM96833v1_genomic.fna       |
| 4907 | <i>Mycobacterium tuberculosis</i> | GCA_000350205.1_ASM35020v1_genomic.fna       |
| 4908 | <i>Mycobacterium bovis</i>        | GCA_001580385.1_ASM158038v1_genomic.fna      |
| 4909 | <i>Mycobacterium avium</i>        | GCA_001936215.1_ASM193621v1_genomic.fna      |
| 4910 | <i>Listeria monocytogenes</i>     | GCA_000209755.1_ASM20975v1_genomic.fna       |
| 4911 | <i>Lactococcus lactis</i>         | GCA_000807375.1_ASM80737v1_genomic.fna       |
| 4912 | <i>Bacillus cereus</i>            | GCA_000635895.2_ASM63589v2_genomic.fna       |
| 4913 | <i>Staphylococcus aureus</i>      | GCA_000017085.1_ASM1708v1_genomic.fna        |
| 4914 | <i>Yersinia pestis</i>            | GCA_000834275.1_ASM83427v1_genomic.fna       |
| 4915 | <i>Pseudomonas fluorescens</i>    | GCA_001708465.1_ASM170846v1_genomic.fna      |
| 4916 | <i>Campylobacter jejuni</i>       | GCA_000466065.2_ASM46606v2_genomic.fna       |
| 4917 | <i>Salmonella enterica</i>        | GCA_000020885.1_ASM2088v1_genomic.fna        |
| 4918 | <i>Salmonella enterica</i>        | GCA_000020925.1_ASM2092v1_genomic.fna        |
| 4919 | <i>Campylobacter jejuni</i>       | GCA_000466075.2_ASM46607v2_genomic.fna       |
| 4920 | <i>Pseudomonas fluorescens</i>    | GCA_001708485.1_ASM170848v1_genomic.fna      |
| 4921 | <i>Yersinia pestis</i>            | GCA_000834315.1_ASM83431v1_genomic.fna       |
| 4922 | <i>Staphylococcus aureus</i>      | GCA_000017125.1_ASM1712v1_genomic.fna        |
| 4923 | <i>Bacillus cereus</i>            | GCA_000789315.1_ASM78931v1_genomic.fna       |
| 4924 | <i>Lactococcus lactis</i>         | GCA_002078375.1_ASM207837v1_genomic.fna      |
| 4925 | <i>Listeria monocytogenes</i>     | GCA_000210815.2_ASM21081v2_genomic.fna       |
| 4926 | <i>Mycobacterium avium</i>        | GCA_002208705.1_ASM220870v1_genomic.fna      |
| 4927 | <i>Mycobacterium tuberculosis</i> | GCA_000364825.1_ASM36482v1_genomic.fna       |

|      |                                   |                                               |
|------|-----------------------------------|-----------------------------------------------|
| 4928 | <i>Haemophilus influenzae</i>     | GCA_001457655.1_NCTC8143_genomic.fna          |
| 4929 | <i>Escherichia coli</i>           | GCA_000013305.1_ASM1330v1_genomic.fna         |
| 4930 | <i>Helicobacter pylori</i>        | GCA_000148915.1_ASM14891v1_genomic.fna        |
| 4931 | <i>Neisseria meningitidis</i>     | GCA_000626595.1_ASM62659v1_genomic.fna        |
| 4932 | <i>Buchnera aphidicola</i>        | GCA_900128725.1_BCifornacula_v1.0_genomic.fna |
| 4933 | <i>Pseudomonas putida</i>         | GCA_000498395.3_ASM49839v3_genomic.fna        |
| 4934 | <i>Streptococcus pyogenes</i>     | GCA_000250905.1_ASM25090v1_genomic.fna        |
| 4935 | <i>Streptococcus pneumoniae</i>   | GCA_000196595.1_ASM19659v1_genomic.fna        |
| 4936 | <i>Streptococcus agalactiae</i>   | GCA_001026925.1_ASM102692v1_genomic.fna       |
| 4937 | <i>Bacillus anthracis</i>         | GCA_000832465.1_ASM83246v1_genomic.fna        |
| 4938 | <i>Shigella flexneri</i>          | GCA_002442995.1_ASM244299v1_genomic.fna       |
| 4939 | <i>Bifidobacterium longum</i>     | GCA_001293145.1_ASM129314v1_genomic.fna       |
| 4940 | <i>Streptococcus suis</i>         | GCA_000390245.1_ASM39024v1_genomic.fna        |
| 4941 | <i>Acinetobacter baumannii</i>    | GCA_000505685.2_ASM50568v2_genomic.fna        |
| 4942 | <i>Pseudomonas aeruginosa</i>     | GCA_000504045.1_ASM50404v1_genomic.fna        |
| 4943 | <i>Legionella pneumophila</i>     | GCA_001652645.1_ASM165264v1_genomic.fna       |
| 4944 | <i>Streptococcus thermophilus</i> | GCA_001855705.1_ASM185570v1_genomic.fna       |
| 4945 | <i>Corynebacterium glutamicum</i> | GCA_001687645.1_ASM168764v1_genomic.fna       |
| 4946 | <i>Chlamydia trachomatis</i>      | GCA_000210495.1_ASM21049v1_genomic.fna        |
| 4947 | <i>Burkholderia cenocepacia</i>   | GCA_002007585.1_ASM200758v1_genomic.fna       |
| 4948 | <i>Burkholderia pseudomallei</i>  | GCA_000755905.1_ASM75590v1_genomic.fna        |
| 4949 | <i>Bacillus thuringiensis</i>     | GCA_000747545.1_ASM74754v1_genomic.fna        |
| 4950 | <i>Burkholderia mallei</i>        | GCA_000959625.1_ASM95962v1_genomic.fna        |
| 4951 | <i>Ralstonia solanacearum</i>     | GCA_002220465.1_ASM222046v1_genomic.fna       |
| 4952 | <i>Vibrio cholerae</i>            | GCA_001250235.2_5174_7_8_v2_genomic.fna       |
| 4953 | <i>Francisella tularensis</i>     | GCA_000248435.1_ASM24843v1_genomic.fna        |
| 4954 | <i>Lactobacillus delbrueckii</i>  | GCA_002278095.1_ASM227809v1_genomic.fna       |
| 4955 | <i>Brucella abortus</i>           | GCA_002262975.1_ASM226297v1_genomic.fna       |
| 4956 | <i>Xanthomonas citri</i>          | GCA_000961355.1_ASM96135v1_genomic.fna        |
| 4957 | <i>Xanthomonas oryzae</i>         | GCA_001466505.1_ASM146650v1_genomic.fna       |
| 4958 | <i>Bacillus subtilis</i>          | GCA_000699525.1_ASM69952v1_genomic.fna        |
| 4959 | <i>Vibrio parahaemolyticus</i>    | GCA_001887055.1_ASM188705v1_genomic.fna       |
| 4960 | <i>Burkholderia thailandensis</i> | GCA_001718635.1_ASM171863v1_genomic.fna       |
| 4961 | <i>Clostridium botulinum</i>      | GCA_000789355.1_ASM78935v1_genomic.fna        |

|      |                                           |                                              |
|------|-------------------------------------------|----------------------------------------------|
| 4962 | <i>Brucella suis</i>                      | GCA_001715425.1_ASM171542v1_genomic.fna      |
| 4963 | <i>Enterococcus faecalis</i>              | GCA_002208945.1_ASM220894v1_genomic.fna      |
| 4964 | <i>Klebsiella pneumoniae</i>              | GCA_000465975.2_ASM46597v2_genomic.fna       |
| 4965 | <i>Bacillus amyloliquefaciens</i>         | GCA_001593785.1_ASM159378v1_genomic.fna      |
| 4966 | <i>Bifidobacterium animalis</i>           | GCA_000817045.1_ASM81704v1_genomic.fna       |
| 4967 | <i>Neisseria gonorrhoeae</i>              | GCA_900186935.1_49677_G01_genomic.fna        |
| 4968 | <i>Enterococcus faecium</i>               | GCA_001886635.1_ASM188663v1_genomic.fna      |
| 4969 | <i>Acetobacter pasteurianus</i>           | GCA_002173775.1_ASM217377v1_genomic.fna      |
| 4970 | <i>Pasteurella multocida</i>              | GCA_002073255.1_ASM207325v1_genomic.fna      |
| 4971 | <i>Brucella melitensis</i>                | GCA_002191375.1_ASM219137v1_genomic.fna      |
| 4972 | <i>Sinorhizobium meliloti</i>             | GCA_002197125.1_ASM219712v1_genomic.fna      |
| 4973 | <i>Bordetella pertussis</i>               | GCA_001307705.1_ASM130770v1_genomic.fna      |
| 4974 | <i>Mycoplasma pneumoniae</i>              | GCA_001272835.1_ASM127283v1_genomic.fna      |
| 4975 | <i>Corynebacterium diphtheriae</i>        | GCA_001902275.1_ASM190227v1_genomic.fna      |
| 4976 | <i>Yersinia enterocolitica</i>            | GCA_001708655.1_ASM170865v1_genomic.fna      |
| 4977 | <i>Dehalococcoides mccartyi</i>           | GCA_002007825.1_ASM200782v1_genomic.fna      |
| 4978 | <i>Lactobacillus plantarum</i>            | GCA_001596095.1_ASM159609v1_genomic.fna      |
| 4979 | <i>Serratia marcescens</i>                | GCA_002220615.1_ASM222061v1_genomic.fna      |
| 4980 | <i>Cutibacterium acnes</i>                | GCA_001469615.1_ASM146961v1_genomic.fna      |
| 4981 | <i>Campylobacter coli</i>                 | GCA_001865535.1_ASM186553v1_genomic.fna      |
| 4982 | <i>Enterobacter cloacae</i>               | GCA_001922365.1_ASM192236v1_genomic.fna      |
| 4983 | <i>Mycobacterium abscessus</i>            | GCA_001606295.1_ASM160629v1_genomic.fna      |
| 4984 | <i>Corynebacterium pseudotuberculosis</i> | GCA_000265545.2_ASM26554v2_genomic.fna       |
| 4985 | <i>Piscirickettsia salmonis</i>           | GCA_001932875.1_ASM193287v1_genomic.fna      |
| 4986 | <i>Staphylococcus cohnii</i>              | GCA_001990205.1_ASM199020v1_genomic.fna      |
| 4987 | <i>Bacillus velezensis</i>                | GCA_001023595.1_ASM102359v1_genomic.fna      |
| 4988 | <i>Bacillus velezensis</i>                | GCA_001536925.1_BMC_PRJEB12378v1_genomic.fna |
| 4989 | <i>Piscirickettsia salmonis</i>           | GCA_001932895.1_ASM193289v1_genomic.fna      |
| 4990 | <i>Corynebacterium pseudotuberculosis</i> | GCA_000730365.1_ASM73036v1_genomic.fna       |
| 4991 | <i>Lysinibacillus sphaericus</i>          | GCA_000017965.1_ASM1796v1_genomic.fna        |
| 4992 | <i>Mycobacterium abscessus</i>            | GCA_001606315.1_ASM160631v1_genomic.fna      |
| 4993 | <i>Enterobacter cloacae</i>               | GCA_002007805.1_ASM200780v1_genomic.fna      |
| 4994 | <i>Campylobacter coli</i>                 | GCA_001865555.1_ASM186555v1_genomic.fna      |
| 4995 | <i>Cutibacterium acnes</i>                | GCA_001469655.1_ASM146965v1_genomic.fna      |

|      |                                    |                                         |
|------|------------------------------------|-----------------------------------------|
| 4996 | <i>Serratia marcescens</i>         | GCA_002220635.1_ASM222063v1_genomic.fna |
| 4997 | <i>Lactobacillus plantarum</i>     | GCA_001617525.1_ASM161752v1_genomic.fna |
| 4998 | <i>Dehalococcoides mccartyi</i>    | GCA_002007845.1_ASM200784v1_genomic.fna |
| 4999 | <i>Mycoplasma pneumoniae</i>       | GCA_001272855.1_ASM127285v1_genomic.fna |
| 5000 | <i>Corynebacterium diphtheriae</i> | GCA_002073375.1_ASM207337v1_genomic.fna |
| 5001 | <i>Bordetella pertussis</i>        | GCA_001307725.1_ASM130772v1_genomic.fna |
| 5002 | <i>Sinorhizobium meliloti</i>      | GCA_002197145.1_ASM219714v1_genomic.fna |
| 5003 | <i>Brucella melitensis</i>         | GCA_002191455.1_ASM219145v1_genomic.fna |
| 5004 | <i>Pasteurella multocida</i>       | GCA_002073295.1_ASM207329v1_genomic.fna |
| 5005 | <i>Acetobacter pasteurianus</i>    | GCA_002202135.1_ASM220213v1_genomic.fna |
| 5006 | <i>Enterococcus faecium</i>        | GCA_001895905.1_ASM189590v1_genomic.fna |
| 5007 | <i>Bifidobacterium animalis</i>    | GCA_000818055.1_ASM81805v1_genomic.fna  |
| 5008 | <i>Bacillus amyloliquefaciens</i>  | GCA_001596755.1_ASM159675v1_genomic.fna |
| 5009 | <i>Enterococcus faecalis</i>       | GCA_002355755.1_ASM235575v1_genomic.fna |
| 5010 | <i>Klebsiella pneumoniae</i>       | GCA_000474015.1_ASM47401v1_genomic.fna  |
| 5011 | <i>Clostridium botulinum</i>       | GCA_000817935.1_ASM81793v1_genomic.fna  |
| 5012 | <i>Burkholderia thailandensis</i>  | GCA_002386205.1_ASM238620v1_genomic.fna |
| 5013 | <i>Mycoplasma mycoides</i>         | GCA_001554095.1_ASM155409v1_genomic.fna |
| 5014 | <i>Vibrio parahaemolyticus</i>     | GCA_002073775.1_ASM207377v1_genomic.fna |
| 5015 | <i>Bacillus subtilis</i>           | GCA_000706705.1_ASM70670v1_genomic.fna  |
| 5016 | <i>Xanthomonas oryzae</i>          | GCA_001518895.1_ASM151889v1_genomic.fna |
| 5017 | <i>Xanthomonas citri</i>           | GCA_000961375.1_ASM96137v1_genomic.fna  |
| 5018 | <i>Brucella abortus</i>            | GCA_002262995.1_ASM226299v1_genomic.fna |
| 5019 | <i>Lactobacillus delbrueckii</i>   | GCA_002285775.1_ASM228577v1_genomic.fna |
| 5020 | <i>Francisella tularensis</i>      | GCA_000313385.1_ASM31338v1_genomic.fna  |
| 5021 | <i>Ralstonia solanacearum</i>      | GCA_002501565.1_ASM250156v1_genomic.fna |
| 5022 | <i>Vibrio cholerae</i>             | GCA_001318185.1_ASM131818v1_genomic.fna |
| 5023 | <i>Burkholderia mallei</i>         | GCA_001729545.1_ASM172954v1_genomic.fna |
| 5024 | <i>Bacillus thuringiensis</i>      | GCA_000803665.1_ASM80366v1_genomic.fna  |
| 5025 | <i>Burkholderia pseudomallei</i>   | GCA_000755925.1_ASM75592v1_genomic.fna  |
| 5026 | <i>Chlamydia trachomatis</i>       | GCA_000220105.1_ASM22010v1_genomic.fna  |
| 5027 | <i>Corynebacterium glutamicum</i>  | GCA_001936195.1_ASM193619v1_genomic.fna |
| 5028 | <i>Streptococcus thermophilus</i>  | GCA_002012365.1_ASM201236v1_genomic.fna |
| 5029 | <i>Legionella pneumophila</i>      | GCA_001652665.1_ASM165266v1_genomic.fna |

|      |                                   |                                         |
|------|-----------------------------------|-----------------------------------------|
| 5030 | <i>Acinetobacter baumannii</i>    | GCA_000695855.3_ASM69585v3_genomic.fna  |
| 5031 | <i>Pseudomonas aeruginosa</i>     | GCA_000508765.1_ASM50876v1_genomic.fna  |
| 5032 | <i>Streptococcus agalactiae</i>   | GCA_001190805.1_ASM119080v1_genomic.fna |
| 5033 | <i>Streptococcus suis</i>         | GCA_000471985.1_ASM47198v1_genomic.fna  |
| 5034 | <i>Bifidobacterium longum</i>     | GCA_001446255.1_ASM144625v1_genomic.fna |
| 5035 | <i>Bacillus anthracis</i>         | GCA_000832505.1_ASM83250v1_genomic.fna  |
| 5036 | <i>Streptococcus pneumoniae</i>   | GCA_000210935.1_ASM21093v1_genomic.fna  |
| 5037 | <i>Streptococcus pyogenes</i>     | GCA_000250925.1_ASM25092v1_genomic.fna  |
| 5038 | <i>Pseudomonas putida</i>         | GCA_000691565.1_ASM69156v1_genomic.fna  |
| 5039 | <i>Neisseria meningitidis</i>     | GCA_000787195.2_ASM78719v2_genomic.fna  |
| 5040 | <i>Buchnera aphidicola</i>        | GCA_000021065.1_ASM2106v1_genomic.fna   |
| 5041 | <i>Helicobacter pylori</i>        | GCA_000178935.2_ASM17893v2_genomic.fna  |
| 5042 | <i>Escherichia coli</i>           | GCA_000014845.1_ASM1484v1_genomic.fna   |
| 5043 | <i>Mycobacterium tuberculosis</i> | GCA_000389945.1_ASM38994v1_genomic.fna  |
| 5044 | <i>Haemophilus influenzae</i>     | GCA_001856725.1_ASM185672v1_genomic.fna |
| 5045 | <i>Mycobacterium avium</i>        | GCA_002716905.1_ASM271690v1_genomic.fna |
| 5046 | <i>Listeria monocytogenes</i>     | GCA_000218305.1_ASM21830v1_genomic.fna  |
| 5047 | <i>Lactococcus lactis</i>         | GCA_002078395.1_ASM207839v1_genomic.fna |
| 5048 | <i>Bacillus cereus</i>            | GCA_000832385.1_ASM83238v1_genomic.fna  |
| 5049 | <i>Yersinia pestis</i>            | GCA_000834335.1_ASM83433v1_genomic.fna  |
| 5050 | <i>Salmonella enterica</i>        | GCA_000022165.1_ASM2216v1_genomic.fna   |
| 5051 | <i>Pseudomonas fluorescens</i>    | GCA_001747385.1_ASM174738v1_genomic.fna |
| 5052 | <i>Campylobacter jejuni</i>       | GCA_000466105.2_ASM46610v2_genomic.fna  |
| 5053 | <i>Staphylococcus aureus</i>      | GCA_000024585.1_ASM2458v1_genomic.fna   |
| 5054 | <i>Staphylococcus aureus</i>      | GCA_000025145.2_ASM2514v1_genomic.fna   |
| 5055 | <i>Salmonella enterica</i>        | GCA_000026565.1_ASM2656v1_genomic.fna   |
| 5056 | <i>Campylobacter jejuni</i>       | GCA_000468915.2_ASM46891v2_genomic.fna  |
| 5057 | <i>Yersinia pestis</i>            | GCA_000834495.1_ASM83449v1_genomic.fna  |
| 5058 | <i>Bacillus cereus</i>            | GCA_000832405.1_ASM83240v1_genomic.fna  |
| 5059 | <i>Lactococcus lactis</i>         | GCA_002078415.1_ASM207841v1_genomic.fna |
| 5060 | <i>Listeria monocytogenes</i>     | GCA_000258905.1_ASM25890v1_genomic.fna  |
| 5061 | <i>Mycobacterium avium</i>        | GCA_002716925.1_ASM271692v1_genomic.fna |
| 5062 | <i>Haemophilus influenzae</i>     | GCA_002073475.1_ASM207347v1_genomic.fna |
| 5063 | <i>Mycobacterium tuberculosis</i> | GCA_000400615.1_ASM40061v1_genomic.fna  |

|      |                                   |                                                                |
|------|-----------------------------------|----------------------------------------------------------------|
| 5064 | <i>Escherichia coli</i>           | GCA_000017745.1_ASM1774v1_genomic.fna                          |
| 5065 | <i>Helicobacter pylori</i>        | GCA_000185185.1_ASM18518v1_genomic.fna                         |
| 5066 | <i>Buchnera aphidicola</i>        | GCA_000021085.1_ASM2108v1_genomic.fna                          |
| 5067 | <i>Neisseria meningitidis</i>     | GCA_000800235.1_ASM80023v1_genomic.fna                         |
| 5068 | <i>Streptococcus pyogenes</i>     | GCA_000307535.1_ASM30753v1_genomic.fna                         |
| 5069 | <i>Streptococcus pneumoniae</i>   | GCA_000210955.1_ASM21095v1_genomic.fna                         |
| 5070 | <i>Pseudomonas putida</i>         | GCA_001515585.2_ASM151558v2_genomic.fna                        |
| 5071 | <i>Bacillus anthracis</i>         | GCA_000832565.1_ASM83256v1_genomic.fna                         |
| 5072 | <i>Bifidobacterium longum</i>     | GCA_001446275.1_ASM144627v1_genomic.fna                        |
| 5073 | <i>Streptococcus agalactiae</i>   | GCA_001190885.1_ASM119088v1_genomic.fna                        |
| 5074 | <i>Streptococcus suis</i>         | GCA_000494895.1_ASM49489v1_genomic.fna                         |
| 5075 | <i>Acinetobacter baumannii</i>    | GCA_000746605.1_ASM74660v1_genomic.fna                         |
| 5076 | <i>Pseudomonas aeruginosa</i>     | GCA_000510305.1_ASM51030v1_genomic.fna                         |
| 5077 | <i>Legionella pneumophila</i>     | GCA_001652685.1_ASM165268v1_genomic.fna                        |
| 5078 | <i>Streptococcus thermophilus</i> | GCA_002286255.1_ASM228625v1_genomic.fna                        |
| 5079 | <i>Corynebacterium glutamicum</i> | GCA_002163915.1_ASM216391v1_genomic.fna                        |
| 5080 | <i>Chlamydia trachomatis</i>      | GCA_000226605.1_ASM22660v1_genomic.fna                         |
| 5081 | <i>Burkholderia pseudomallei</i>  | GCA_000755945.1_ASM75594v1_genomic.fna                         |
| 5082 | <i>Bacillus thuringiensis</i>     | GCA_000832485.1_ASM83248v1_genomic.fna                         |
| 5083 | <i>Burkholderia mallei</i>        | GCA_002345985.1_ASM234598v1_genomic.fna                        |
| 5084 | <i>Ralstonia solanacearum</i>     | GCA_002549815.1_ASM254981v1_genomic.fna                        |
| 5085 | <i>Vibrio cholerae</i>            | GCA_001683415.1_ASM168341v1_genomic.fna                        |
| 5086 | <i>Francisella tularensis</i>     | GCA_000524575.1_ASM52457v1_genomic.fna                         |
| 5087 | <i>Lactobacillus delbrueckii</i>  | GCA_900196735.1_Lactobacillus_bulgaricus_ACA-DC_87_genomic.fna |
| 5088 | <i>Xanthomonas citri</i>          | GCA_000961395.1_ASM96139v1_genomic.fna                         |
| 5089 | <i>Xanthomonas oryzae</i>         | GCA_001746595.1_ASM174659v1_genomic.fna                        |
| 5090 | <i>Bacillus subtilis</i>          | GCA_000737405.1_ASM73740v1_genomic.fna                         |
| 5091 | <i>Vibrio parahaemolyticus</i>    | GCA_002209725.2_ASM220972v2_genomic.fna                        |
| 5092 | <i>Mycoplasma mycoides</i>        | GCA_001554115.1_ASM155411v1_genomic.fna                        |
| 5093 | <i>Clostridium botulinum</i>      | GCA_000827935.1_ASM82793v1_genomic.fna                         |
| 5094 | <i>Klebsiella pneumoniae</i>      | GCA_000512165.1_ASM51216v1_genomic.fna                         |
| 5095 | <i>Bifidobacterium animalis</i>   | GCA_001688645.2_ASM168864v2_genomic.fna                        |
| 5096 | <i>Bacillus amyloliquefaciens</i> | GCA_001705195.1_ASM170519v1_genomic.fna                        |
| 5097 | <i>Enterococcus faecium</i>       | GCA_001953235.1_ASM195323v1_genomic.fna                        |

|      |                                           |                                         |
|------|-------------------------------------------|-----------------------------------------|
| 5098 | <i>Acetobacter pasteurianus</i>           | GCA_002220195.1_ASM222019v1_genomic.fna |
| 5099 | <i>Pasteurella multocida</i>              | GCA_002393385.1_ASM239338v1_genomic.fna |
| 5100 | <i>Brucella melitensis</i>                | GCA_002191575.1_ASM219157v1_genomic.fna |
| 5101 | <i>Sinorhizobium meliloti</i>             | GCA_002197165.1_ASM219716v1_genomic.fna |
| 5102 | <i>Bordetella pertussis</i>               | GCA_001307745.1_ASM130774v1_genomic.fna |
| 5103 | <i>Mycoplasma pneumoniae</i>              | GCA_001272875.1_ASM127287v1_genomic.fna |
| 5104 | <i>Dehalococcoides mccartyi</i>           | GCA_002007865.1_ASM200786v1_genomic.fna |
| 5105 | <i>Lactobacillus plantarum</i>            | GCA_001659745.1_ASM165974v1_genomic.fna |
| 5106 | <i>Serratia marcescens</i>                | GCA_002220655.1_ASM222065v1_genomic.fna |
| 5107 | <i>Campylobacter coli</i>                 | GCA_001936355.1_ASM193635v1_genomic.fna |
| 5108 | <i>Enterobacter cloacae</i>               | GCA_002025685.1_ASM202568v1_genomic.fna |
| 5109 | <i>Mycobacterium abscessus</i>            | GCA_001606335.1_ASM160633v1_genomic.fna |
| 5110 | <i>Corynebacterium pseudotuberculosis</i> | GCA_000730405.1_ASM73040v1_genomic.fna  |
| 5111 | <i>Staphylococcus sciuri</i>              | GCA_002072755.1_ASM207275v1_genomic.fna |
| 5112 | <i>Piscirickettsia salmonis</i>           | GCA_001932915.1_ASM193291v1_genomic.fna |
| 5113 | <i>Bacillus velezensis</i>                | GCA_001593395.2_ASM159339v2_genomic.fna |
| 5114 | <i>Bacillus velezensis</i>                | GCA_001685645.1_ASM168564v1_genomic.fna |
| 5115 | <i>Piscirickettsia salmonis</i>           | GCA_001932935.1_ASM193293v1_genomic.fna |
| 5116 | <i>Corynebacterium pseudotuberculosis</i> | GCA_000730445.1_ASM73044v1_genomic.fna  |
| 5117 | <i>Mycobacterium abscessus</i>            | GCA_001610615.1_ASM161061v1_genomic.fna |
| 5118 | <i>Enterobacter cloacae</i>               | GCA_002055735.1_ASM205573v1_genomic.fna |
| 5119 | <i>Campylobacter coli</i>                 | GCA_002407145.1_ASM240714v1_genomic.fna |
| 5120 | <i>Serratia marcescens</i>                | GCA_002220675.1_ASM222067v1_genomic.fna |
| 5121 | <i>Lactobacillus plantarum</i>            | GCA_001660025.1_ASM166002v1_genomic.fna |
| 5122 | <i>Dehalococcoides mccartyi</i>           | GCA_002007905.1_ASM200790v1_genomic.fna |
| 5123 | <i>Mycoplasma pneumoniae</i>              | GCA_001272895.1_ASM127289v1_genomic.fna |
| 5124 | <i>Bordetella pertussis</i>               | GCA_001509895.1_ASM150989v1_genomic.fna |
| 5125 | <i>Sinorhizobium meliloti</i>             | GCA_002197445.1_ASM219744v1_genomic.fna |
| 5126 | <i>Brucella melitensis</i>                | GCA_002191615.1_ASM219161v1_genomic.fna |
| 5127 | <i>Pasteurella multocida</i>              | GCA_002591295.1_ASM259129v1_genomic.fna |
| 5128 | <i>Enterococcus faecium</i>               | GCA_001953255.1_ASM195325v1_genomic.fna |
| 5129 | <i>Bifidobacterium animalis</i>           | GCA_002220485.1_ASM222048v1_genomic.fna |
| 5130 | <i>Bacillus amyloliquefaciens</i>         | GCA_001874385.1_ASM187438v1_genomic.fna |
| 5131 | <i>Klebsiella pneumoniae</i>              | GCA_000597905.1_ASM59790v1_genomic.fna  |

|      |                                   |                                         |
|------|-----------------------------------|-----------------------------------------|
| 5132 | <i>Clostridium botulinum</i>      | GCA_000827955.1_ASM82795v1_genomic.fna  |
| 5133 | <i>Vibrio parahaemolyticus</i>    | GCA_002220985.2_HGAP_genomic.fna        |
| 5134 | <i>Bacillus subtilis</i>          | GCA_000772125.1_ASM77212v1_genomic.fna  |
| 5135 | <i>Xanthomonas oryzae</i>         | GCA_001746615.1_ASM174661v1_genomic.fna |
| 5136 | <i>Xanthomonas citri</i>          | GCA_000961415.1_ASM96141v1_genomic.fna  |
| 5137 | <i>Francisella tularensis</i>     | GCA_000833165.1_ASM83316v1_genomic.fna  |
| 5138 | <i>Vibrio cholerae</i>            | GCA_001854425.1_ASM185442v1_genomic.fna |
| 5139 | <i>Burkholderia mallei</i>        | GCA_002346005.1_ASM234600v1_genomic.fna |
| 5140 | <i>Bacillus thuringiensis</i>     | GCA_000832825.1_ASM83282v1_genomic.fna  |
| 5141 | <i>Burkholderia pseudomallei</i>  | GCA_000755965.1_ASM75596v1_genomic.fna  |
| 5142 | <i>Chlamydia trachomatis</i>      | GCA_000284475.1_ASM28447v1_genomic.fna  |
| 5143 | <i>Corynebacterium glutamicum</i> | GCA_002220135.1_ASM222013v1_genomic.fna |
| 5144 | <i>Streptococcus thermophilus</i> | GCA_002443035.1_ASM244303v1_genomic.fna |
| 5145 | <i>Legionella pneumophila</i>     | GCA_001677075.2_ASM167707v2_genomic.fna |
| 5146 | <i>Pseudomonas aeruginosa</i>     | GCA_000524595.1_ASM52459v1_genomic.fna  |
| 5147 | <i>Streptococcus agalactiae</i>   | GCA_001266635.1_ASM126663v1_genomic.fna |
| 5148 | <i>Acinetobacter baumannii</i>    | GCA_000761175.1_ASM76117v1_genomic.fna  |
| 5149 | <i>Streptococcus suis</i>         | GCA_000732355.1_ASM73235v1_genomic.fna  |
| 5150 | <i>Bifidobacterium longum</i>     | GCA_001719085.1_ASM171908v1_genomic.fna |
| 5151 | <i>Bacillus anthracis</i>         | GCA_000832585.1_ASM83258v1_genomic.fna  |
| 5152 | <i>Streptococcus pneumoniae</i>   | GCA_000210975.1_ASM21097v1_genomic.fna  |
| 5153 | <i>Streptococcus pyogenes</i>     | GCA_000349925.2_ASM34992v2_genomic.fna  |
| 5154 | <i>Pseudomonas putida</i>         | GCA_001636055.1_ASM163605v1_genomic.fna |
| 5155 | <i>Neisseria meningitidis</i>     | GCA_000800275.1_ASM80027v1_genomic.fna  |
| 5156 | <i>Buchnera aphidicola</i>        | GCA_000183225.1_ASM18322v1_genomic.fna  |
| 5157 | <i>Helicobacter pylori</i>        | GCA_000185205.1_ASM18520v1_genomic.fna  |
| 5158 | <i>Escherichia coli</i>           | GCA_000017765.1_ASM1776v1_genomic.fna   |
| 5159 | <i>Mycobacterium avium</i>        | GCA_002716965.1_ASM271696v1_genomic.fna |
| 5160 | <i>Mycobacterium tuberculosis</i> | GCA_000422125.1_ASM42212v1_genomic.fna  |
| 5161 | <i>Listeria monocytogenes</i>     | GCA_000306905.1_ASM30690v1_genomic.fna  |
| 5162 | <i>Lactococcus lactis</i>         | GCA_002078435.1_ASM207843v1_genomic.fna |
| 5163 | <i>Bacillus cereus</i>            | GCA_000832525.1_ASM83252v1_genomic.fna  |
| 5164 | <i>Yersinia pestis</i>            | GCA_000834755.1_ASM83475v1_genomic.fna  |
| 5165 | <i>Salmonella enterica</i>        | GCA_000027025.1_ASM2702v1_genomic.fna   |



|      |                                   |                                           |
|------|-----------------------------------|-------------------------------------------|
| 5166 | <i>Campylobacter jejuni</i>       | GCA_000493495.1_TS_genomic.fna            |
| 5167 | <i>Staphylococcus aureus</i>      | GCA_000027045.1_ASM2704v1_genomic.fna     |
| 5168 | <i>Staphylococcus aureus</i>      | GCA_000144955.1_ASM14495v1_genomic.fna    |
| 5169 | <i>Campylobacter jejuni</i>       | GCA_000632435.1_ASM63243v1_genomic.fna    |
| 5170 | <i>Salmonella enterica</i>        | GCA_000188735.1_ASM18873v1_genomic.fna    |
| 5171 | <i>Yersinia pestis</i>            | GCA_000834775.1_ASM83477v1_genomic.fna    |
| 5172 | <i>Bacillus cereus</i>            | GCA_000832765.1_ASM83276v1_genomic.fna    |
| 5173 | <i>Lactococcus lactis</i>         | GCA_002078455.1_ASM207845v1_genomic.fna   |
| 5174 | <i>Listeria monocytogenes</i>     | GCA_000306985.1_ASM30698v1_genomic.fna    |
| 5175 | <i>Mycobacterium tuberculosis</i> | GCA_000572125.1_ASM57212v1_genomic.fna    |
| 5176 | <i>Escherichia coli</i>           | GCA_000017985.1_ASM1798v1_genomic.fna     |
| 5177 | <i>Helicobacter pylori</i>        | GCA_000185225.1_ASM18522v1_genomic.fna    |
| 5178 | <i>Buchnera aphidicola</i>        | GCA_000183245.1_ASM18324v1_genomic.fna    |
| 5179 | <i>Neisseria meningitidis</i>     | GCA_000800315.1_ASM80031v1_genomic.fna    |
| 5180 | <i>Pseudomonas putida</i>         | GCA_001767335.1_ASM176733v1_genomic.fna   |
| 5181 | <i>Streptococcus pyogenes</i>     | GCA_000422045.1_ASM42204v1_genomic.fna    |
| 5182 | <i>Streptococcus pneumoniae</i>   | GCA_000210995.1_ASM21099v1_genomic.fna    |
| 5183 | <i>Bacillus anthracis</i>         | GCA_000832635.1_ASM83263v1_genomic.fna    |
| 5184 | <i>Bifidobacterium longum</i>     | GCA_001725985.1_ASM172598v1_genomic.fna   |
| 5185 | <i>Pseudomonas aeruginosa</i>     | GCA_000568855.2_ASM56885v2_genomic.fna    |
| 5186 | <i>Streptococcus suis</i>         | GCA_000993745.1_ASM99374v1_genomic.fna    |
| 5187 | <i>Acinetobacter baumannii</i>    | GCA_000786735.1_ASM78673v1_genomic.fna    |
| 5188 | <i>Streptococcus agalactiae</i>   | GCA_001275545.2_ASM127554v2_genomic.fna   |
| 5189 | <i>Legionella pneumophila</i>     | GCA_001677115.2_ASM167711v2_genomic.fna   |
| 5190 | <i>Streptococcus thermophilus</i> | GCA_900094135.1_ASM90009413v1_genomic.fna |
| 5191 | <i>Corynebacterium glutamicum</i> | GCA_002243555.1_ASM224355v1_genomic.fna   |
| 5192 | <i>Chlamydia trachomatis</i>      | GCA_000304495.1_Cm_ESW3_genomic.fna       |
| 5193 | <i>Burkholderia pseudomallei</i>  | GCA_000756065.1_ASM75606v1_genomic.fna    |
| 5194 | <i>Bacillus thuringiensis</i>     | GCA_000832925.1_ASM83292v1_genomic.fna    |
| 5195 | <i>Burkholderia mallei</i>        | GCA_002346025.1_ASM234602v1_genomic.fna   |
| 5196 | <i>Vibrio cholerae</i>            | GCA_001887395.1_ASM188739v1_genomic.fna   |
| 5197 | <i>Francisella tularensis</i>     | GCA_000833235.1_ASM83323v1_genomic.fna    |
| 5198 | <i>Xanthomonas citri</i>          | GCA_000961435.1_ASM96143v1_genomic.fna    |
| 5199 | <i>Xanthomonas oryzae</i>         | GCA_001746635.1_ASM174663v1_genomic.fna   |

|      |                                           |                                         |
|------|-------------------------------------------|-----------------------------------------|
| 5200 | <i>Bacillus subtilis</i>                  | GCA_000772165.1_ASM77216v1_genomic.fna  |
| 5201 | <i>Clostridium botulinum</i>              | GCA_000829015.1_ASM82901v1_genomic.fna  |
| 5202 | <i>Klebsiella pneumoniae</i>              | GCA_000598005.1_ASM59800v1_genomic.fna  |
| 5203 | <i>Bacillus amyloliquefaciens</i>         | GCA_001889285.1_ASM188928v1_genomic.fna |
| 5204 | <i>Enterococcus faecium</i>               | GCA_002007625.1_ASM200762v1_genomic.fna |
| 5205 | <i>Pasteurella multocida</i>              | GCA_900187275.1_51765_F01_genomic.fna   |
| 5206 | <i>Brucella melitensis</i>                | GCA_002191655.1_ASM219165v1_genomic.fna |
| 5207 | <i>Sinorhizobium meliloti</i>             | GCA_002197465.1_ASM219746v1_genomic.fna |
| 5208 | <i>Bordetella pertussis</i>               | GCA_001509915.1_ASM150991v1_genomic.fna |
| 5209 | <i>Mycoplasma pneumoniae</i>              | GCA_001272915.1_ASM127291v1_genomic.fna |
| 5210 | <i>Dehalococcoides mccartyi</i>           | GCA_002021775.1_ASM202177v1_genomic.fna |
| 5211 | <i>Lactobacillus plantarum</i>            | GCA_001672035.1_ASM167203v1_genomic.fna |
| 5212 | <i>Serratia marcescens</i>                | GCA_002220695.1_ASM222069v1_genomic.fna |
| 5213 | <i>Enterobacter cloacae</i>               | GCA_002192355.1_ASM219235v1_genomic.fna |
| 5214 | <i>Mycobacterium abscessus</i>            | GCA_001610635.1_ASM161063v1_genomic.fna |
| 5215 | <i>Corynebacterium pseudotuberculosis</i> | GCA_000764045.2_ASM76404v2_genomic.fna  |
| 5216 | <i>Piscirickettsia salmonis</i>           | GCA_001932955.1_ASM193295v1_genomic.fna |
| 5217 | <i>Bacillus velezensis</i>                | GCA_001687745.1_ASM168774v1_genomic.fna |
| 5218 | <i>Bacillus velezensis</i>                | GCA_001723585.1_ASM172358v1_genomic.fna |
| 5219 | <i>Corynebacterium pseudotuberculosis</i> | GCA_000814865.1_ASM81486v1_genomic.fna  |
| 5220 | <i>Mycobacterium abscessus</i>            | GCA_001610655.1_ASM161065v1_genomic.fna |
| 5221 | <i>Enterobacter cloacae</i>               | GCA_002192395.1_ASM219239v1_genomic.fna |
| 5222 | <i>Serratia marcescens</i>                | GCA_002220715.1_ASM222071v1_genomic.fna |
| 5223 | <i>Lactobacillus plantarum</i>            | GCA_001704315.1_ASM170431v1_genomic.fna |
| 5224 | <i>Dehalococcoides mccartyi</i>           | GCA_002024205.1_ASM202420v1_genomic.fna |
| 5225 | <i>Mycoplasma pneumoniae</i>              | GCA_001509195.1_ASM150919v1_genomic.fna |
| 5226 | <i>Bordetella pertussis</i>               | GCA_001605035.1_ASM160503v1_genomic.fna |
| 5227 | <i>Sinorhizobium meliloti</i>             | GCA_002215195.1_ASM221519v1_genomic.fna |
| 5228 | <i>Brucella melitensis</i>                | GCA_002191675.1_ASM219167v1_genomic.fna |
| 5229 | <i>Enterococcus faecium</i>               | GCA_002024245.1_ASM202424v1_genomic.fna |
| 5230 | <i>Bacillus amyloliquefaciens</i>         | GCA_001922005.1_ASM192200v1_genomic.fna |
| 5231 | <i>Klebsiella pneumoniae</i>              | GCA_000695935.1_ASM69593v1_genomic.fna  |
| 5232 | <i>Clostridium botulinum</i>              | GCA_001879605.1_ASM187960v1_genomic.fna |
| 5233 | <i>Bacillus subtilis</i>                  | GCA_000772205.1_ASM77220v1_genomic.fna  |

|      |                                   |                                         |
|------|-----------------------------------|-----------------------------------------|
| 5234 | <i>Xanthomonas oryzae</i>         | GCA_001746655.1_ASM174665v1_genomic.fna |
| 5235 | <i>Xanthomonas citri</i>          | GCA_000961455.1_ASM96145v1_genomic.fna  |
| 5236 | <i>Francisella tularensis</i>     | GCA_000833335.1_ASM83333v1_genomic.fna  |
| 5237 | <i>Vibrio cholerae</i>            | GCA_001887415.1_ASM188741v1_genomic.fna |
| 5238 | <i>Burkholderia mallei</i>        | GCA_002346045.1_ASM234604v1_genomic.fna |
| 5239 | <i>Bacillus thuringiensis</i>     | GCA_000833085.1_ASM83308v1_genomic.fna  |
| 5240 | <i>Burkholderia pseudomallei</i>  | GCA_000756085.1_ASM75608v1_genomic.fna  |
| 5241 | <i>Chlamydia trachomatis</i>      | GCA_000304515.1_Cm_FSW4_genomic.fna     |
| 5242 | <i>Corynebacterium glutamicum</i> | GCA_002277975.1_ASM227797v1_genomic.fna |
| 5243 | <i>Legionella pneumophila</i>     | GCA_001752705.1_ASM175270v1_genomic.fna |
| 5244 | <i>Streptococcus agalactiae</i>   | GCA_001448985.1_ASM144898v1_genomic.fna |
| 5245 | <i>Pseudomonas aeruginosa</i>     | GCA_000816985.1_ASM81698v1_genomic.fna  |
| 5246 | <i>Acinetobacter baumannii</i>    | GCA_000814345.1_ASM81434v1_genomic.fna  |
| 5247 | <i>Streptococcus suis</i>         | GCA_001272635.1_ASM127263v1_genomic.fna |
| 5248 | <i>Bacillus anthracis</i>         | GCA_000832665.1_ASM83266v1_genomic.fna  |
| 5249 | <i>Streptococcus pneumoniae</i>   | GCA_000211015.1_ASM21101v1_genomic.fna  |
| 5250 | <i>Streptococcus pyogenes</i>     | GCA_000732425.1_ASM73242v1_genomic.fna  |
| 5251 | <i>Pseudomonas putida</i>         | GCA_001886975.1_ASM188697v1_genomic.fna |
| 5252 | <i>Neisseria meningitidis</i>     | GCA_000800355.1_ASM80035v1_genomic.fna  |
| 5253 | <i>Buchnera aphidicola</i>        | GCA_000183285.1_ASM18328v1_genomic.fna  |
| 5254 | <i>Helicobacter pylori</i>        | GCA_000185245.1_ASM18524v1_genomic.fna  |
| 5255 | <i>Escherichia coli</i>           | GCA_000019385.1_ASM1938v1_genomic.fna   |
| 5256 | <i>Mycobacterium tuberculosis</i> | GCA_000572155.1_ASM57215v1_genomic.fna  |
| 5257 | <i>Listeria monocytogenes</i>     | GCA_000307005.1_ASM30700v1_genomic.fna  |
| 5258 | <i>Lactococcus lactis</i>         | GCA_002078475.1_ASM207847v1_genomic.fna |
| 5259 | <i>Bacillus cereus</i>            | GCA_000832805.1_ASM83280v1_genomic.fna  |
| 5260 | <i>Yersinia pestis</i>            | GCA_000834825.1_ASM83482v1_genomic.fna  |
| 5261 | <i>Campylobacter jejuni</i>       | GCA_000737085.1_ASM73708v1_genomic.fna  |
| 5262 | <i>Salmonella enterica</i>        | GCA_000188955.5_ASM18895v5_genomic.fna  |
| 5263 | <i>Staphylococcus aureus</i>      | GCA_000145595.1_ASM14559v1_genomic.fna  |
| 5264 | <i>Staphylococcus aureus</i>      | GCA_000159535.2_ASM15953v2_genomic.fna  |
| 5265 | <i>Campylobacter jejuni</i>       | GCA_000772225.1_ASM77222v1_genomic.fna  |
| 5266 | <i>Salmonella enterica</i>        | GCA_000210855.2_ASM21085v2_genomic.fna  |
| 5267 | <i>Yersinia pestis</i>            | GCA_000834845.1_ASM83484v1_genomic.fna  |

|      |                                   |                                         |
|------|-----------------------------------|-----------------------------------------|
| 5268 | <i>Bacillus cereus</i>            | GCA_000832845.1_ASM83284v1_genomic.fna  |
| 5269 | <i>Lactococcus lactis</i>         | GCA_002078495.1_ASM207849v1_genomic.fna |
| 5270 | <i>Listeria monocytogenes</i>     | GCA_000307025.1_ASM30702v1_genomic.fna  |
| 5271 | <i>Mycobacterium tuberculosis</i> | GCA_000572175.1_ASM57217v1_genomic.fna  |
| 5272 | <i>Escherichia coli</i>           | GCA_000019425.1_ASM1942v1_genomic.fna   |
| 5273 | <i>Helicobacter pylori</i>        | GCA_000192315.1_ASM19231v1_genomic.fna  |
| 5274 | <i>Buchnera aphidicola</i>        | GCA_000183305.1_ASM18330v1_genomic.fna  |
| 5275 | <i>Neisseria meningitidis</i>     | GCA_000800415.1_ASM80041v1_genomic.fna  |
| 5276 | <i>Pseudomonas putida</i>         | GCA_002025705.1_ASM202570v1_genomic.fna |
| 5277 | <i>Streptococcus pyogenes</i>     | GCA_000743015.1_ASM74301v1_genomic.fna  |
| 5278 | <i>Streptococcus pneumoniae</i>   | GCA_000211035.2_ASM21103v2_genomic.fna  |
| 5279 | <i>Bacillus anthracis</i>         | GCA_000832725.1_ASM83272v1_genomic.fna  |
| 5280 | <i>Streptococcus suis</i>         | GCA_001572685.1_ASM157268v1_genomic.fna |
| 5281 | <i>Acinetobacter baumannii</i>    | GCA_000828795.1_ASM82879v1_genomic.fna  |
| 5282 | <i>Pseudomonas aeruginosa</i>     | GCA_000829255.1_ASM82925v1_genomic.fna  |
| 5283 | <i>Streptococcus agalactiae</i>   | GCA_001552035.1_ASM155203v1_genomic.fna |
| 5284 | <i>Legionella pneumophila</i>     | GCA_001752725.1_ASM175272v1_genomic.fna |
| 5285 | <i>Chlamydia trachomatis</i>      | GCA_000304535.1_Cm_FSW5_genomic.fna     |
| 5286 | <i>Corynebacterium glutamicum</i> | GCA_002355155.1_ASM235515v1_genomic.fna |
| 5287 | <i>Burkholderia pseudomallei</i>  | GCA_000756125.1_ASM75612v1_genomic.fna  |
| 5288 | <i>Bacillus thuringiensis</i>     | GCA_000835025.1_ASM83502v1_genomic.fna  |
| 5289 | <i>Burkholderia mallei</i>        | GCA_002346065.1_ASM234606v1_genomic.fna |
| 5290 | <i>Vibrio cholerae</i>            | GCA_001887435.1_ASM188743v1_genomic.fna |
| 5291 | <i>Francisella tularensis</i>     | GCA_000833355.1_ASM83335v1_genomic.fna  |
| 5292 | <i>Xanthomonas citri</i>          | GCA_000961475.1_ASM96147v1_genomic.fna  |
| 5293 | <i>Xanthomonas oryzae</i>         | GCA_001746675.1_ASM174667v1_genomic.fna |
| 5294 | <i>Bacillus subtilis</i>          | GCA_000782835.1_ASM78283v1_genomic.fna  |
| 5295 | <i>Clostridium botulinum</i>      | GCA_001879625.1_ASM187962v1_genomic.fna |
| 5296 | <i>Klebsiella pneumoniae</i>      | GCA_000714675.1_ASM71467v1_genomic.fna  |
| 5297 | <i>Bacillus amyloliquefaciens</i> | GCA_002173635.1_ASM217363v1_genomic.fna |
| 5298 | <i>Enterococcus faecium</i>       | GCA_002025045.1_ASM202504v1_genomic.fna |
| 5299 | <i>Brucella melitensis</i>        | GCA_002191755.1_ASM219175v1_genomic.fna |
| 5300 | <i>Sinorhizobium meliloti</i>     | GCA_002302355.1_ASM230235v1_genomic.fna |
| 5301 | <i>Bordetella pertussis</i>       | GCA_001605055.1_ASM160505v1_genomic.fna |

|      |                                           |                                         |
|------|-------------------------------------------|-----------------------------------------|
| 5302 | <i>Mycoplasma pneumoniae</i>              | GCA_001558175.1_ASM155817v1_genomic.fna |
| 5303 | <i>Dehalococcoides mccartyi</i>           | GCA_002024225.1_ASM202422v1_genomic.fna |
| 5304 | <i>Lactobacillus plantarum</i>            | GCA_001704335.1_ASM170433v1_genomic.fna |
| 5305 | <i>Serratia marcescens</i>                | GCA_900029885.1_Sm_SMB2099_genomic.fna  |
| 5306 | <i>Enterobacter cloacae</i>               | GCA_002197345.1_ASM219734v1_genomic.fna |
| 5307 | <i>Mycobacterium abscessus</i>            | GCA_001610675.1_ASM161067v1_genomic.fna |
| 5308 | <i>Corynebacterium pseudotuberculosis</i> | GCA_000972805.1_ASM97280v1_genomic.fna  |
| 5309 | <i>Bacillus velezensis</i>                | GCA_001752685.1_ASM175268v1_genomic.fna |
| 5310 | <i>Bacillus velezensis</i>                | GCA_001854345.1_ASM185434v1_genomic.fna |
| 5311 | <i>Corynebacterium pseudotuberculosis</i> | GCA_001017615.1_ASM101761v1_genomic.fna |
| 5312 | <i>Mycobacterium abscessus</i>            | GCA_001677095.1_ASM167709v1_genomic.fna |
| 5313 | <i>Enterobacter cloacae</i>               | GCA_002201815.1_ASM220181v1_genomic.fna |
| 5314 | <i>Lactobacillus plantarum</i>            | GCA_001715615.1_ASM171561v1_genomic.fna |
| 5315 | <i>Dehalococcoides mccartyi</i>           | GCA_002028285.1_ASM202828v1_genomic.fna |
| 5316 | <i>Mycoplasma pneumoniae</i>              | GCA_001901705.1_ASM190170v1_genomic.fna |
| 5317 | <i>Bordetella pertussis</i>               | GCA_001605075.1_ASM160507v1_genomic.fna |
| 5318 | <i>Sinorhizobium meliloti</i>             | GCA_002302375.1_ASM230237v1_genomic.fna |
| 5319 | <i>Brucella melitensis</i>                | GCA_002191915.1_ASM219191v1_genomic.fna |
| 5320 | <i>Enterococcus faecium</i>               | GCA_002025065.1_ASM202506v1_genomic.fna |
| 5321 | <i>Bacillus amyloliquefaciens</i>         | GCA_002209305.1_ASM220930v1_genomic.fna |
| 5322 | <i>Klebsiella pneumoniae</i>              | GCA_000717515.1_ASM71751v1_genomic.fna  |
| 5323 | <i>Clostridium botulinum</i>              | GCA_001886775.1_ASM188677v1_genomic.fna |
| 5324 | <i>Bacillus subtilis</i>                  | GCA_000789275.1_ASM78927v1_genomic.fna  |
| 5325 | <i>Xanthomonas oryzae</i>                 | GCA_001746695.1_ASM174669v1_genomic.fna |
| 5326 | <i>Xanthomonas citri</i>                  | GCA_000961495.1_ASM96149v1_genomic.fna  |
| 5327 | <i>Francisella tularensis</i>             | GCA_000833375.1_ASM83337v1_genomic.fna  |
| 5328 | <i>Vibrio cholerae</i>                    | GCA_001887455.1_ASM188745v1_genomic.fna |
| 5329 | <i>Burkholderia mallei</i>                | GCA_002346085.1_ASM234608v1_genomic.fna |
| 5330 | <i>Bacillus thuringiensis</i>             | GCA_000940785.1_ASM94078v1_genomic.fna  |
| 5331 | <i>Burkholderia pseudomallei</i>          | GCA_000756145.1_ASM75614v1_genomic.fna  |
| 5332 | <i>Corynebacterium glutamicum</i>         | GCA_002355675.1_ASM235567v1_genomic.fna |
| 5333 | <i>Chlamydia trachomatis</i>              | GCA_000318525.2_ASM31852v2_genomic.fna  |
| 5334 | <i>Legionella pneumophila</i>             | GCA_001752745.1_ASM175274v1_genomic.fna |
| 5335 | <i>Streptococcus agalactiae</i>           | GCA_001592385.1_ASM159238v1_genomic.fna |

|      |                                   |                                         |
|------|-----------------------------------|-----------------------------------------|
| 5336 | <i>Pseudomonas aeruginosa</i>     | GCA_000829275.1_ASM82927v1_genomic.fna  |
| 5337 | <i>Acinetobacter baumannii</i>    | GCA_000828935.1_ASM82893v1_genomic.fna  |
| 5338 | <i>Streptococcus suis</i>         | GCA_001610935.1_ASM161093v1_genomic.fna |
| 5339 | <i>Bacillus anthracis</i>         | GCA_000832745.1_ASM83274v1_genomic.fna  |
| 5340 | <i>Streptococcus pneumoniae</i>   | GCA_000211055.2_ASM21105v2_genomic.fna  |
| 5341 | <i>Streptococcus pyogenes</i>     | GCA_000756485.1_ASM75648v1_genomic.fna  |
| 5342 | <i>Pseudomonas putida</i>         | GCA_002356095.1_ASM235609v1_genomic.fna |
| 5343 | <i>Neisseria meningitidis</i>     | GCA_000816165.1_ASM81616v1_genomic.fna  |
| 5344 | <i>Buchnera aphidicola</i>        | GCA_000521525.1_ASM52152v1_genomic.fna  |
| 5345 | <i>Helicobacter pylori</i>        | GCA_000192335.1_ASM19233v1_genomic.fna  |
| 5346 | <i>Escherichia coli</i>           | GCA_000019645.1_ASM1964v1_genomic.fna   |
| 5347 | <i>Mycobacterium tuberculosis</i> | GCA_000572195.1_ASM57219v1_genomic.fna  |
| 5348 | <i>Listeria monocytogenes</i>     | GCA_000307045.1_ASM30704v1_genomic.fna  |
| 5349 | <i>Lactococcus lactis</i>         | GCA_002078615.1_ASM207861v1_genomic.fna |
| 5350 | <i>Bacillus cereus</i>            | GCA_000832865.1_ASM83286v1_genomic.fna  |
| 5351 | <i>Staphylococcus aureus</i>      | GCA_000160335.2_ASM16033v2_genomic.fna  |
| 5352 | <i>Yersinia pestis</i>            | GCA_000834885.1_ASM83488v1_genomic.fna  |
| 5353 | <i>Salmonella enterica</i>        | GCA_000213635.1_ASM21363v1_genomic.fna  |
| 5354 | <i>Campylobacter jejuni</i>       | GCA_000807355.1_ASM80735v1_genomic.fna  |
| 5355 | <i>Campylobacter jejuni</i>       | GCA_000830775.1_ASM83077v1_genomic.fna  |
| 5356 | <i>Salmonella enterica</i>        | GCA_000235545.1_ASM23554v1_genomic.fna  |
| 5357 | <i>Staphylococcus aureus</i>      | GCA_000204665.1_ASM20466v1_genomic.fna  |
| 5358 | <i>Yersinia pestis</i>            | GCA_000834925.1_ASM83492v1_genomic.fna  |
| 5359 | <i>Bacillus cereus</i>            | GCA_000833045.1_ASM83304v1_genomic.fna  |
| 5360 | <i>Lactococcus lactis</i>         | GCA_002078765.1_ASM207876v1_genomic.fna |
| 5361 | <i>Listeria monocytogenes</i>     | GCA_000307065.1_ASM30706v1_genomic.fna  |
| 5362 | <i>Mycobacterium tuberculosis</i> | GCA_000698475.1_ASM69847v1_genomic.fna  |
| 5363 | <i>Escherichia coli</i>           | GCA_000021125.1_ASM2112v1_genomic.fna   |
| 5364 | <i>Helicobacter pylori</i>        | GCA_000196755.1_ASM19675v1_genomic.fna  |
| 5365 | <i>Buchnera aphidicola</i>        | GCA_000521545.1_ASM52154v1_genomic.fna  |
| 5366 | <i>Neisseria meningitidis</i>     | GCA_001029815.1_ASM102981v1_genomic.fna |
| 5367 | <i>Pseudomonas putida</i>         | GCA_002736045.1_ASM273604v1_genomic.fna |
| 5368 | <i>Streptococcus pyogenes</i>     | GCA_000767505.1_ASM76750v1_genomic.fna  |
| 5369 | <i>Streptococcus pneumoniae</i>   | GCA_000211075.1_ASM21107v1_genomic.fna  |

|      |                                           |                                         |
|------|-------------------------------------------|-----------------------------------------|
| 5370 | <i>Bacillus anthracis</i>                 | GCA_000832785.1_ASM83278v1_genomic.fna  |
| 5371 | <i>Streptococcus suis</i>                 | GCA_001640765.1_ASM164076v1_genomic.fna |
| 5372 | <i>Acinetobacter baumannii</i>            | GCA_000830055.1_ASM83005v1_genomic.fna  |
| 5373 | <i>Pseudomonas aeruginosa</i>             | GCA_000829885.1_ASM82988v1_genomic.fna  |
| 5374 | <i>Streptococcus agalactiae</i>           | GCA_001592425.1_ASM159242v1_genomic.fna |
| 5375 | <i>Legionella pneumophila</i>             | GCA_001752765.1_ASM175276v1_genomic.fna |
| 5376 | <i>Chlamydia trachomatis</i>              | GCA_000318565.1_ASM31856v1_genomic.fna  |
| 5377 | <i>Burkholderia pseudomallei</i>          | GCA_000756165.1_ASM75616v1_genomic.fna  |
| 5378 | <i>Bacillus thuringiensis</i>             | GCA_001017635.1_ASM101763v1_genomic.fna |
| 5379 | <i>Burkholderia mallei</i>                | GCA_002346105.1_ASM234610v1_genomic.fna |
| 5380 | <i>Vibrio cholerae</i>                    | GCA_001887475.1_ASM188747v1_genomic.fna |
| 5381 | <i>Francisella tularensis</i>             | GCA_000833475.1_ASM83347v1_genomic.fna  |
| 5382 | <i>Xanthomonas oryzae</i>                 | GCA_001746715.1_ASM174671v1_genomic.fna |
| 5383 | <i>Xanthomonas citri</i>                  | GCA_001028285.3_ASM102828v3_genomic.fna |
| 5384 | <i>Bacillus subtilis</i>                  | GCA_000789295.1_ASM78929v1_genomic.fna  |
| 5385 | <i>Clostridium botulinum</i>              | GCA_001889325.1_ASM188932v1_genomic.fna |
| 5386 | <i>Klebsiella pneumoniae</i>              | GCA_000733255.1_ASM73325v1_genomic.fna  |
| 5387 | <i>Enterococcus faecium</i>               | GCA_002334625.1_ASM233462v1_genomic.fna |
| 5388 | <i>Brucella melitensis</i>                | GCA_002192095.1_ASM219209v1_genomic.fna |
| 5389 | <i>Bordetella pertussis</i>               | GCA_001605095.1_ASM160509v1_genomic.fna |
| 5390 | <i>Mycoplasma pneumoniae</i>              | GCA_002090215.1_ASM209021v1_genomic.fna |
| 5391 | <i>Dehalococcoides mccartyi</i>           | GCA_002356375.1_ASM235637v1_genomic.fna |
| 5392 | <i>Lactobacillus plantarum</i>            | GCA_001874125.1_ASM187412v1_genomic.fna |
| 5393 | <i>Enterobacter cloacae</i>               | GCA_002204775.1_ASM220477v1_genomic.fna |
| 5394 | <i>Mycobacterium abscessus</i>            | GCA_001677155.1_ASM167715v1_genomic.fna |
| 5395 | <i>Corynebacterium pseudotuberculosis</i> | GCA_001026945.1_ASM102694v1_genomic.fna |
| 5396 | <i>Bacillus velezensis</i>                | GCA_001857985.1_ASM185798v1_genomic.fna |
| 5397 | <i>Bacillus velezensis</i>                | GCA_002005345.1_ASM200534v1_genomic.fna |
| 5398 | <i>Corynebacterium pseudotuberculosis</i> | GCA_001047215.2_ASM104721v2_genomic.fna |
| 5399 | <i>Mycobacterium abscessus</i>            | GCA_001677175.1_ASM167717v1_genomic.fna |
| 5400 | <i>Enterobacter cloacae</i>               | GCA_002211685.1_ASM221168v1_genomic.fna |
| 5401 | <i>Lactobacillus plantarum</i>            | GCA_001880185.1_ASM188018v1_genomic.fna |
| 5402 | <i>Mycoplasma pneumoniae</i>              | GCA_002090235.1_ASM209023v1_genomic.fna |
| 5403 | <i>Bordetella pertussis</i>               | GCA_001605115.1_ASM160511v1_genomic.fna |

|      |                                   |                                                                             |
|------|-----------------------------------|-----------------------------------------------------------------------------|
| 5404 | <i>Brucella melitensis</i>        | GCA_002192155.1_ASM219215v1_genomic.fna                                     |
| 5405 | <i>Enterococcus faecium</i>       | GCA_002442955.1_ASM244295v1_genomic.fna                                     |
| 5406 | <i>Klebsiella pneumoniae</i>      | GCA_000739495.1_ASM73949v1_genomic.fna                                      |
| 5407 | <i>Clostridium botulinum</i>      | GCA_001889345.1_ASM188934v1_genomic.fna                                     |
| 5408 | <i>Bacillus subtilis</i>          | GCA_000827065.1_ASM82706v1_genomic.fna                                      |
| 5409 | <i>Xanthomonas citri</i>          | GCA_001719145.1_ASM171914v1_genomic.fna                                     |
| 5410 | <i>Xanthomonas oryzae</i>         | GCA_001746735.1_ASM174673v1_genomic.fna                                     |
| 5411 | <i>Francisella tularensis</i>     | GCA_000833495.1_ASM83349v1_genomic.fna                                      |
| 5412 | <i>Vibrio cholerae</i>            | GCA_001887495.1_ASM188749v1_genomic.fna                                     |
| 5413 | <i>Burkholderia mallei</i>        | GCA_002346125.1_ASM234612v1_genomic.fna                                     |
| 5414 | <i>Bacillus thuringiensis</i>     | GCA_001182785.1_ASM118278v1_genomic.fna                                     |
| 5415 | <i>Burkholderia pseudomallei</i>  | GCA_000756185.1_ASM75618v1_genomic.fna                                      |
| 5416 | <i>Chlamydia trachomatis</i>      | GCA_000318645.1_ASM31864v1_genomic.fna                                      |
| 5417 | <i>Legionella pneumophila</i>     | GCA_001752785.1_ASM175278v1_genomic.fna                                     |
| 5418 | <i>Acinetobacter baumannii</i>    | GCA_000939415.2_HGAP_assembly_of_Acinetobacter_baumannii_ORAB01_genomic.fna |
| 5419 | <i>Pseudomonas aeruginosa</i>     | GCA_000981825.1_ASM98182v1_genomic.fna                                      |
| 5420 | <i>Streptococcus suis</i>         | GCA_001721625.1_ASM172162v1_genomic.fna                                     |
| 5421 | <i>Bacillus anthracis</i>         | GCA_000832965.1_ASM83296v1_genomic.fna                                      |
| 5422 | <i>Streptococcus agalactiae</i>   | GCA_001683515.1_ASM168351v1_genomic.fna                                     |
| 5423 | <i>Streptococcus pneumoniae</i>   | GCA_000211095.1_ASM21109v1_genomic.fna                                      |
| 5424 | <i>Streptococcus pyogenes</i>     | GCA_000772185.1_ASM77218v1_genomic.fna                                      |
| 5425 | <i>Pseudomonas putida</i>         | GCA_002736125.1_ASM273612v1_genomic.fna                                     |
| 5426 | <i>Neisseria meningitidis</i>     | GCA_001029835.1_ASM102983v1_genomic.fna                                     |
| 5427 | <i>Buchnera aphidicola</i>        | GCA_000521585.1_ASM52158v1_genomic.fna                                      |
| 5428 | <i>Helicobacter pylori</i>        | GCA_000213135.1_ASM21313v1_genomic.fna                                      |
| 5429 | <i>Escherichia coli</i>           | GCA_000022225.1_ASM2222v1_genomic.fna                                       |
| 5430 | <i>Mycobacterium tuberculosis</i> | GCA_000706665.1_ASM70666v1_genomic.fna                                      |
| 5431 | <i>Listeria monocytogenes</i>     | GCA_000307085.1_ASM30708v1_genomic.fna                                      |
| 5432 | <i>Lactococcus lactis</i>         | GCA_002078855.1_ASM207885v1_genomic.fna                                     |
| 5433 | <i>Bacillus cereus</i>            | GCA_000835185.1_ASM83518v1_genomic.fna                                      |
| 5434 | <i>Yersinia pestis</i>            | GCA_000834985.1_ASM83498v1_genomic.fna                                      |
| 5435 | <i>Staphylococcus aureus</i>      | GCA_000210315.1_ASM21031v1_genomic.fna                                      |
| 5436 | <i>Salmonella enterica</i>        | GCA_000245535.1_ASM24553v1_genomic.fna                                      |
| 5437 | <i>Campylobacter jejuni</i>       | GCA_000830805.1_ASM83080v1_genomic.fna                                      |



|      |                                   |                                                                |
|------|-----------------------------------|----------------------------------------------------------------|
| 5438 | <i>Campylobacter jejuni</i>       | GCA_000830825.1_ASM83082v1_genomic.fna                         |
| 5439 | <i>Salmonella enterica</i>        | GCA_000252875.1_ASM25287v1_genomic.fna                         |
| 5440 | <i>Staphylococcus aureus</i>      | GCA_000237125.1_ASM23712v1_genomic.fna                         |
| 5441 | <i>Yersinia pestis</i>            | GCA_001188695.1_ASM118869v1_genomic.fna                        |
| 5442 | <i>Bacillus cereus</i>            | GCA_000978375.1_ASM97837v1_genomic.fna                         |
| 5443 | <i>Lactococcus lactis</i>         | GCA_002078895.1_ASM207889v1_genomic.fna                        |
| 5444 | <i>Listeria monocytogenes</i>     | GCA_000307615.1_ASM30761v1_genomic.fna                         |
| 5445 | <i>Mycobacterium tuberculosis</i> | GCA_000738445.1_ASM73844v1_genomic.fna                         |
| 5446 | <i>Escherichia coli</i>           | GCA_000022345.1_ASM2234v1_genomic.fna                          |
| 5447 | <i>Helicobacter pylori</i>        | GCA_000224535.1_ASM22453v1_genomic.fna                         |
| 5448 | <i>Pseudomonas putida</i>         | GCA_002741075.1_IEC330191.0_genomic.fna                        |
| 5449 | <i>Neisseria meningitidis</i>     | GCA_001697105.1_ASM169710v1_genomic.fna                        |
| 5450 | <i>Streptococcus pyogenes</i>     | GCA_000772245.1_ASM77224v1_genomic.fna                         |
| 5451 | <i>Streptococcus pneumoniae</i>   | GCA_000251085.2_ASM25108v2_genomic.fna                         |
| 5452 | <i>Bacillus anthracis</i>         | GCA_000833065.1_ASM83306v1_genomic.fna                         |
| 5453 | <i>Streptococcus suis</i>         | GCA_001936415.1_ASM193641v1_genomic.fna                        |
| 5454 | <i>Pseudomonas aeruginosa</i>     | GCA_001045685.1_ASM104568v1_genomic.fna                        |
| 5455 | <i>Streptococcus agalactiae</i>   | GCA_001712835.1_ASM171283v1_genomic.fna                        |
| 5456 | <i>Acinetobacter baumannii</i>    | GCA_000963815.1_ASM96381v1_genomic.fna                         |
| 5457 | <i>Legionella pneumophila</i>     | GCA_001752805.1_ASM175280v1_genomic.fna                        |
| 5458 | <i>Chlamydia trachomatis</i>      | GCA_000318765.1_ASM31876v1_genomic.fna                         |
| 5459 | <i>Bacillus thuringiensis</i>     | GCA_001183785.1_ASM118378v1_genomic.fna                        |
| 5460 | <i>Burkholderia mallei</i>        | GCA_002346145.1_ASM234614v1_genomic.fna                        |
| 5461 | <i>Burkholderia pseudomallei</i>  | GCA_000757015.2_ASM75701v2_genomic.fna                         |
| 5462 | <i>Vibrio cholerae</i>            | GCA_001887515.1_ASM188751v1_genomic.fna                        |
| 5463 | <i>Francisella tularensis</i>     | GCA_000833515.1_ASM83351v1_genomic.fna                         |
| 5464 | <i>Xanthomonas citri</i>          | GCA_001854145.1_ASM185414v1_genomic.fna                        |
| 5465 | <i>Xanthomonas oryzae</i>         | GCA_002023005.1_ASM202300v1_genomic.fna                        |
| 5466 | <i>Bacillus subtilis</i>          | GCA_000953615.1_BS49Ch_genomic.fna                             |
| 5467 | <i>Klebsiella pneumoniae</i>      | GCA_000742755.1_ASM74275v1_genomic.fna                         |
| 5468 | <i>Enterococcus faecium</i>       | GCA_900066025.1_Enterococcus_faecium_E1002_isolate_genomic.fna |
| 5469 | <i>Brucella melitensis</i>        | GCA_002214285.1_ASM221428v1_genomic.fna                        |
| 5470 | <i>Bordetella pertussis</i>       | GCA_001605135.1_ASM160513v1_genomic.fna                        |
| 5471 | <i>Mycoplasma pneumoniae</i>      | GCA_002090275.1_ASM209027v1_genomic.fna                        |

|      |                                           |                                         |
|------|-------------------------------------------|-----------------------------------------|
| 5472 | <i>Lactobacillus plantarum</i>            | GCA_001908455.1_ASM190845v1_genomic.fna |
| 5473 | <i>Enterobacter cloacae</i>               | GCA_002237465.1_ASM223746v1_genomic.fna |
| 5474 | <i>Mycobacterium abscessus</i>            | GCA_001677195.1_ASM167719v1_genomic.fna |
| 5475 | <i>Corynebacterium pseudotuberculosis</i> | GCA_001186445.1_ASM118644v1_genomic.fna |
| 5476 | <i>Bacillus velezensis</i>                | GCA_002057535.1_ASM205753v1_genomic.fna |
| 5477 | <i>Bacillus velezensis</i>                | GCA_002072695.1_ASM207269v1_genomic.fna |
| 5478 | <i>Corynebacterium pseudotuberculosis</i> | GCA_001298505.1_ASM129850v1_genomic.fna |
| 5479 | <i>Mycobacterium abscessus</i>            | GCA_001677215.1_ASM167721v1_genomic.fna |
| 5480 | <i>Enterobacter cloacae</i>               | GCA_002303275.1_ASM230327v1_genomic.fna |
| 5481 | <i>Lactobacillus plantarum</i>            | GCA_001990145.1_ASM199014v1_genomic.fna |
| 5482 | <i>Mycoplasma pneumoniae</i>              | GCA_002090295.1_ASM209029v1_genomic.fna |
| 5483 | <i>Bordetella pertussis</i>               | GCA_001605155.1_ASM160515v1_genomic.fna |
| 5484 | <i>Brucella melitensis</i>                | GCA_002262955.1_ASM226295v1_genomic.fna |
| 5485 | <i>Enterococcus faecium</i>               | GCA_900092475.1_Ef_aus00233_genomic.fna |
| 5486 | <i>Klebsiella pneumoniae</i>              | GCA_000764615.1_ASM76461v1_genomic.fna  |
| 5487 | <i>Bacillus subtilis</i>                  | GCA_000971925.1_ASM97192v1_genomic.fna  |
| 5488 | <i>Xanthomonas citri</i>                  | GCA_001922045.1_ASM192204v1_genomic.fna |
| 5489 | <i>Francisella tularensis</i>             | GCA_000833535.1_ASM83353v1_genomic.fna  |
| 5490 | <i>Vibrio cholerae</i>                    | GCA_001887615.1_ASM188761v1_genomic.fna |
| 5491 | <i>Burkholderia pseudomallei</i>          | GCA_000757035.2_ASM75703v2_genomic.fna  |
| 5492 | <i>Burkholderia mallei</i>                | GCA_002346165.1_ASM234616v1_genomic.fna |
| 5493 | <i>Bacillus thuringiensis</i>             | GCA_001420855.1_ASM142085v1_genomic.fna |
| 5494 | <i>Chlamydia trachomatis</i>              | GCA_000318785.1_ASM31878v1_genomic.fna  |
| 5495 | <i>Legionella pneumophila</i>             | GCA_001752825.1_ASM175282v1_genomic.fna |
| 5496 | <i>Acinetobacter baumannii</i>            | GCA_001026965.1_ASM102696v1_genomic.fna |
| 5497 | <i>Streptococcus agalactiae</i>           | GCA_001729925.1_ASM172992v1_genomic.fna |
| 5498 | <i>Pseudomonas aeruginosa</i>             | GCA_001077475.1_ASM107747v1_genomic.fna |
| 5499 | <i>Streptococcus suis</i>                 | GCA_002111405.1_ASM211140v1_genomic.fna |
| 5500 | <i>Bacillus anthracis</i>                 | GCA_000833125.1_ASM83312v1_genomic.fna  |
| 5501 | <i>Streptococcus pyogenes</i>             | GCA_000993765.1_ASM99376v1_genomic.fna  |
| 5502 | <i>Neisseria meningitidis</i>             | GCA_001697125.1_ASM169712v1_genomic.fna |
| 5503 | <i>Streptococcus pneumoniae</i>           | GCA_000299015.1_ASM29901v1_genomic.fna  |
| 5504 | <i>Helicobacter pylori</i>                | GCA_000224555.1_ASM22455v1_genomic.fna  |
| 5505 | <i>Escherichia coli</i>                   | GCA_000022665.2_ASM2266v1_genomic.fna   |

|      |                                   |                                         |
|------|-----------------------------------|-----------------------------------------|
| 5506 | <i>Mycobacterium tuberculosis</i> | GCA_000738475.1_ASM73847v1_genomic.fna  |
| 5507 | <i>Listeria monocytogenes</i>     | GCA_000318055.1_ASM31805v1_genomic.fna  |
| 5508 | <i>Lactococcus lactis</i>         | GCA_002078915.1_ASM207891v1_genomic.fna |
| 5509 | <i>Bacillus cereus</i>            | GCA_001277915.1_ASM127791v1_genomic.fna |
| 5510 | <i>Yersinia pestis</i>            | GCA_001188715.1_ASM118871v1_genomic.fna |
| 5511 | <i>Staphylococcus aureus</i>      | GCA_000237265.1_ASM23726v1_genomic.fna  |
| 5512 | <i>Salmonella enterica</i>        | GCA_000258365.1_ASM25836v1_genomic.fna  |
| 5513 | <i>Campylobacter jejuni</i>       | GCA_000830845.1_ASM83084v1_genomic.fna  |
| 5514 | <i>Campylobacter jejuni</i>       | GCA_000830865.1_ASM83086v1_genomic.fna  |
| 5515 | <i>Staphylococcus aureus</i>      | GCA_000239235.1_ASM23923v1_genomic.fna  |
| 5516 | <i>Salmonella enterica</i>        | GCA_000271885.2_ASM27188v2_genomic.fna  |
| 5517 | <i>Yersinia pestis</i>            | GCA_001188755.1_ASM118875v1_genomic.fna |
| 5518 | <i>Bacillus cereus</i>            | GCA_001518875.1_ASM151887v1_genomic.fna |
| 5519 | <i>Lactococcus lactis</i>         | GCA_002078935.1_ASM207893v1_genomic.fna |
| 5520 | <i>Listeria monocytogenes</i>     | GCA_000438585.1_ASM43858v1_genomic.fna  |
| 5521 | <i>Mycobacterium tuberculosis</i> | GCA_000756525.1_ASM75652v1_genomic.fna  |
| 5522 | <i>Escherichia coli</i>           | GCA_000023365.1_ASM2336v1_genomic.fna   |
| 5523 | <i>Helicobacter pylori</i>        | GCA_000224575.1_ASM22457v1_genomic.fna  |
| 5524 | <i>Streptococcus pneumoniae</i>   | GCA_000817005.1_ASM81700v1_genomic.fna  |
| 5525 | <i>Neisseria meningitidis</i>     | GCA_001697165.1_ASM169716v1_genomic.fna |
| 5526 | <i>Streptococcus pyogenes</i>     | GCA_001014285.1_ASM101428v1_genomic.fna |
| 5527 | <i>Bacillus anthracis</i>         | GCA_000833275.1_ASM83327v1_genomic.fna  |
| 5528 | <i>Streptococcus suis</i>         | GCA_002189695.1_ASM218969v1_genomic.fna |
| 5529 | <i>Streptococcus agalactiae</i>   | GCA_001932715.1_ASM193271v1_genomic.fna |
| 5530 | <i>Pseudomonas aeruginosa</i>     | GCA_001293085.1_ASM129308v1_genomic.fna |
| 5531 | <i>Legionella pneumophila</i>     | GCA_001752845.1_ASM175284v1_genomic.fna |
| 5532 | <i>Acinetobacter baumannii</i>    | GCA_001077555.2_ASM107755v2_genomic.fna |
| 5533 | <i>Chlamydia trachomatis</i>      | GCA_000318825.1_ASM31882v1_genomic.fna  |
| 5534 | <i>Bacillus thuringiensis</i>     | GCA_001455345.1_ASM145534v1_genomic.fna |
| 5535 | <i>Burkholderia mallei</i>        | GCA_002346185.1_ASM234618v1_genomic.fna |
| 5536 | <i>Burkholderia pseudomallei</i>  | GCA_000764575.1_ASM76457v1_genomic.fna  |
| 5537 | <i>Vibrio cholerae</i>            | GCA_001887635.1_ASM188763v1_genomic.fna |
| 5538 | <i>Francisella tularensis</i>     | GCA_000978785.2_ASM97878v2_genomic.fna  |
| 5539 | <i>Xanthomonas citri</i>          | GCA_001922065.1_ASM192206v1_genomic.fna |

|      |                                           |                                           |
|------|-------------------------------------------|-------------------------------------------|
| 5540 | <i>Bacillus subtilis</i>                  | GCA_000973605.1_ASM97360v1_genomic.fna    |
| 5541 | <i>Klebsiella pneumoniae</i>              | GCA_000775375.1_ASM77537v1_genomic.fna    |
| 5542 | <i>Streptococcus dysgalactiae</i>         | GCA_000493775.1_ASM49377v1_genomic.fna    |
| 5543 | <i>Brucella melitensis</i>                | GCA_002263015.1_ASM226301v1_genomic.fna   |
| 5544 | <i>Bordetella pertussis</i>               | GCA_001605175.1_ASM160517v1_genomic.fna   |
| 5545 | <i>Mycoplasma pneumoniae</i>              | GCA_002090315.1_ASM209031v1_genomic.fna   |
| 5546 | <i>Lactobacillus plantarum</i>            | GCA_002024845.1_ASM202484v1_genomic.fna   |
| 5547 | <i>Enterobacter cloacae</i>               | GCA_002356475.1_E_cloacae_1.0_genomic.fna |
| 5548 | <i>Mycobacterium abscessus</i>            | GCA_002140035.1_ASM214003v1_genomic.fna   |
| 5549 | <i>Corynebacterium pseudotuberculosis</i> | GCA_001433475.1_ASM143347v1_genomic.fna   |
| 5550 | <i>Bacillus velezensis</i>                | GCA_002105595.1_ASM210559v1_genomic.fna   |
| 5551 | <i>Bacillus velezensis</i>                | GCA_002117165.1_ASM211716v1_genomic.fna   |
| 5552 | <i>Corynebacterium pseudotuberculosis</i> | GCA_001447295.1_ASM144729v1_genomic.fna   |
| 5553 | <i>Lactobacillus plantarum</i>            | GCA_002028365.1_ASM202836v1_genomic.fna   |
| 5554 | <i>Dehalococcoides mccartyi</i>           | GCA_001761445.1_ASM176144v1_genomic.fna   |
| 5555 | <i>Mycoplasma pneumoniae</i>              | GCA_002095995.1_ASM209599v1_genomic.fna   |
| 5556 | <i>Bordetella pertussis</i>               | GCA_001605195.1_ASM160519v1_genomic.fna   |
| 5557 | <i>Klebsiella pneumoniae</i>              | GCA_000775395.1_ASM77539v1_genomic.fna    |
| 5558 | <i>Bacillus subtilis</i>                  | GCA_001015095.1_ASM101509v1_genomic.fna   |
| 5559 | <i>Xanthomonas citri</i>                  | GCA_001922085.1_ASM192208v1_genomic.fna   |
| 5560 | <i>Francisella tularensis</i>             | GCA_001011135.1_ASM101113v1_genomic.fna   |
| 5561 | <i>Vibrio cholerae</i>                    | GCA_001887655.1_ASM188765v1_genomic.fna   |
| 5562 | <i>Bacillus thuringiensis</i>             | GCA_001548175.1_ASM154817v1_genomic.fna   |
| 5563 | <i>Burkholderia pseudomallei</i>          | GCA_000770395.1_ASM77039v1_genomic.fna    |
| 5564 | <i>Burkholderia mallei</i>                | GCA_002346205.1_ASM234620v1_genomic.fna   |
| 5565 | <i>Chlamydia trachomatis</i>              | GCA_000318845.1_ASM31884v1_genomic.fna    |
| 5566 | <i>Legionella pneumophila</i>             | GCA_001752865.1_ASM175286v1_genomic.fna   |
| 5567 | <i>Acinetobacter baumannii</i>            | GCA_001077655.1_ASM107765v1_genomic.fna   |
| 5568 | <i>Pseudomonas aeruginosa</i>             | GCA_001447845.1_ASM144784v1_genomic.fna   |
| 5569 | <i>Streptococcus agalactiae</i>           | GCA_002025005.1_ASM202500v1_genomic.fna   |
| 5570 | <i>Streptococcus suis</i>                 | GCA_002688665.1_ASM268866v1_genomic.fna   |
| 5571 | <i>Bacillus anthracis</i>                 | GCA_000875715.1_ASM87571v1_genomic.fna    |
| 5572 | <i>Streptococcus pyogenes</i>             | GCA_001014305.1_ASM101430v1_genomic.fna   |
| 5573 | <i>Neisseria meningitidis</i>             | GCA_001697205.1_ASM169720v1_genomic.fna   |

|      |                                   |                                             |
|------|-----------------------------------|---------------------------------------------|
| 5574 | <i>Streptococcus pneumoniae</i>   | GCA_001255215.1_S_pneumo_A66_v1_genomic.fna |
| 5575 | <i>Helicobacter pylori</i>        | GCA_000255955.1_ASM25595v1_genomic.fna      |
| 5576 | <i>Escherichia coli</i>           | GCA_000023665.1_ASM2366v1_genomic.fna       |
| 5577 | <i>Mycobacterium tuberculosis</i> | GCA_000756545.1_ASM75654v1_genomic.fna      |
| 5578 | <i>Listeria monocytogenes</i>     | GCA_000438605.1_ASM43860v1_genomic.fna      |
| 5579 | <i>Lactococcus lactis</i>         | GCA_002078955.1_ASM207895v1_genomic.fna     |
| 5580 | <i>Bacillus cereus</i>            | GCA_001635915.1_ASM163591v1_genomic.fna     |
| 5581 | <i>Yersinia pestis</i>            | GCA_001188775.1_ASM118877v1_genomic.fna     |
| 5582 | <i>Salmonella enterica</i>        | GCA_000271905.2_ASM27190v2_genomic.fna      |
| 5583 | <i>Staphylococcus aureus</i>      | GCA_000245495.1_ASM24549v1_genomic.fna      |
| 5584 | <i>Campylobacter jejuni</i>       | GCA_000835285.1_ASM83528v1_genomic.fna      |
| 5585 | <i>Campylobacter jejuni</i>       | GCA_000835305.1_ASM83530v1_genomic.fna      |
| 5586 | <i>Staphylococcus aureus</i>      | GCA_000253135.1_ASM25313v1_genomic.fna      |
| 5587 | <i>Yersinia pestis</i>            | GCA_001188795.1_ASM118879v1_genomic.fna     |
| 5588 | <i>Salmonella enterica</i>        | GCA_000272715.4_ASM27271v4_genomic.fna      |
| 5589 | <i>Bacillus cereus</i>            | GCA_001635955.1_ASM163595v1_genomic.fna     |
| 5590 | <i>Lactococcus lactis</i>         | GCA_002078975.1_ASM207897v1_genomic.fna     |
| 5591 | <i>Listeria monocytogenes</i>     | GCA_000438625.1_ASM43862v1_genomic.fna      |
| 5592 | <i>Mycobacterium tuberculosis</i> | GCA_000786505.1_MT49-02_genomic.fna         |
| 5593 | <i>Escherichia coli</i>           | GCA_000025165.1_ASM2516v1_genomic.fna       |
| 5594 | <i>Helicobacter pylori</i>        | GCA_000259235.1_ASM25923v1_genomic.fna      |
| 5595 | <i>Neisseria meningitidis</i>     | GCA_001697305.1_ASM169730v1_genomic.fna     |
| 5596 | <i>Streptococcus pyogenes</i>     | GCA_001019635.1_ASM101963v1_genomic.fna     |
| 5597 | <i>Bacillus anthracis</i>         | GCA_001543225.1_ASM154322v1_genomic.fna     |
| 5598 | <i>Streptococcus pneumoniae</i>   | GCA_001457635.1_NCTC7465_genomic.fna        |
| 5599 | <i>Streptococcus suis</i>         | GCA_002736265.1_ASM273626v1_genomic.fna     |
| 5600 | <i>Streptococcus agalactiae</i>   | GCA_002025025.1_ASM202502v1_genomic.fna     |
| 5601 | <i>Pseudomonas aeruginosa</i>     | GCA_001457615.1_NCTC10332_genomic.fna       |
| 5602 | <i>Acinetobacter baumannii</i>    | GCA_001077675.1_ASM107767v1_genomic.fna     |
| 5603 | <i>Legionella pneumophila</i>     | GCA_001752885.1_ASM175288v1_genomic.fna     |
| 5604 | <i>Chlamydia trachomatis</i>      | GCA_000318865.1_ASM31886v1_genomic.fna      |
| 5605 | <i>Bacillus thuringiensis</i>     | GCA_001595725.1_ASM159572v1_genomic.fna     |
| 5606 | <i>Burkholderia pseudomallei</i>  | GCA_000770455.1_ASM77045v1_genomic.fna      |
| 5607 | <i>Vibrio cholerae</i>            | GCA_002073335.1_ASM207333v1_genomic.fna     |

|      |                                           |                                         |
|------|-------------------------------------------|-----------------------------------------|
| 5608 | <i>Francisella tularensis</i>             | GCA_001262115.1_ASM126211v1_genomic.fna |
| 5609 | <i>Xanthomonas citri</i>                  | GCA_001922105.1_ASM192210v1_genomic.fna |
| 5610 | <i>Bacillus subtilis</i>                  | GCA_001037985.1_ASM103798v1_genomic.fna |
| 5611 | <i>Klebsiella pneumoniae</i>              | GCA_000775955.1_ASM77595v1_genomic.fna  |
| 5612 | <i>Bordetella pertussis</i>               | GCA_001605215.1_ASM160521v1_genomic.fna |
| 5613 | <i>Mycoplasma pneumoniae</i>              | GCA_002096015.1_ASM209601v1_genomic.fna |
| 5614 | <i>Lactobacillus plantarum</i>            | GCA_002109405.1_ASM210940v1_genomic.fna |
| 5615 | <i>Corynebacterium pseudotuberculosis</i> | GCA_001456175.1_ASM145617v1_genomic.fna |
| 5616 | <i>Bacillus velezensis</i>                | GCA_002157265.1_ASM215726v1_genomic.fna |
| 5617 | <i>Bacillus velezensis</i>                | GCA_002192235.1_ASM219223v1_genomic.fna |
| 5618 | <i>Mycobacterium africanum</i>            | GCA_001544855.1_ASM154485v1_genomic.fna |
| 5619 | <i>Riemerella anatipestifer</i>           | GCA_001051075.1_ASM105107v1_genomic.fna |
| 5620 | <i>Corynebacterium pseudotuberculosis</i> | GCA_001481675.1_ASM148167v1_genomic.fna |
| 5621 | <i>Lactobacillus plantarum</i>            | GCA_002109425.1_ASM210942v1_genomic.fna |
| 5622 | <i>Mycoplasma pneumoniae</i>              | GCA_002096035.1_ASM209603v1_genomic.fna |
| 5623 | <i>Bordetella pertussis</i>               | GCA_001605235.1_ASM160523v1_genomic.fna |
| 5624 | <i>Klebsiella pneumoniae</i>              | GCA_000784945.1_ASM78494v1_genomic.fna  |
| 5625 | <i>Bacillus subtilis</i>                  | GCA_001465815.1_ASM146581v1_genomic.fna |
| 5626 | <i>Xanthomonas citri</i>                  | GCA_002139955.1_ASM213995v1_genomic.fna |
| 5627 | <i>Francisella tularensis</i>             | GCA_001267475.1_ASM126747v1_genomic.fna |
| 5628 | <i>Vibrio cholerae</i>                    | GCA_002313025.1_ASM231302v1_genomic.fna |
| 5629 | <i>Burkholderia pseudomallei</i>          | GCA_000770495.1_ASM77049v1_genomic.fna  |
| 5630 | <i>Bacillus thuringiensis</i>             | GCA_001598095.1_ASM159809v1_genomic.fna |
| 5631 | <i>Chlamydia trachomatis</i>              | GCA_000318885.1_ASM31888v1_genomic.fna  |
| 5632 | <i>Legionella pneumophila</i>             | GCA_001752905.1_ASM175290v1_genomic.fna |
| 5633 | <i>Acinetobacter baumannii</i>            | GCA_001077965.2_ASM107796v2_genomic.fna |
| 5634 | <i>Pseudomonas aeruginosa</i>             | GCA_001482325.1_ASM148232v1_genomic.fna |
| 5635 | <i>Streptococcus agalactiae</i>           | GCA_002073695.1_ASM207369v1_genomic.fna |
| 5636 | <i>Streptococcus pneumoniae</i>           | GCA_001896045.1_ASM189604v1_genomic.fna |
| 5637 | <i>Bacillus anthracis</i>                 | GCA_001654475.1_ASM165447v1_genomic.fna |
| 5638 | <i>Streptococcus pyogenes</i>             | GCA_001019675.1_ASM101967v1_genomic.fna |
| 5639 | <i>Neisseria meningitidis</i>             | GCA_001697325.1_ASM169732v1_genomic.fna |
| 5640 | <i>Helicobacter pylori</i>                | GCA_000270005.1_ASM27000v1_genomic.fna  |
| 5641 | <i>Escherichia coli</i>                   | GCA_000025745.1_ASM2574v1_genomic.fna   |

|      |                                   |                                         |
|------|-----------------------------------|-----------------------------------------|
| 5642 | <i>Mycobacterium tuberculosis</i> | GCA_000827085.1_ASM82708v1_genomic.fna  |
| 5643 | <i>Listeria monocytogenes</i>     | GCA_000438645.1_ASM43864v1_genomic.fna  |
| 5644 | <i>Lactococcus lactis</i>         | GCA_002078995.1_ASM207899v1_genomic.fna |
| 5645 | <i>Bacillus cereus</i>            | GCA_001635995.1_ASM163599v1_genomic.fna |
| 5646 | <i>Salmonella enterica</i>        | GCA_000272735.4_ASM27273v4_genomic.fna  |
| 5647 | <i>Yersinia pestis</i>            | GCA_001188815.1_ASM118881v1_genomic.fna |
| 5648 | <i>Staphylococcus aureus</i>      | GCA_000284535.1_ASM28453v1_genomic.fna  |
| 5649 | <i>Campylobacter jejuni</i>       | GCA_000835345.1_ASM83534v1_genomic.fna  |
| 5650 | <i>Campylobacter jejuni</i>       | GCA_000835365.1_ASM83536v1_genomic.fna  |
| 5651 | <i>Staphylococcus aureus</i>      | GCA_000296595.1_ASM29659v1_genomic.fna  |
| 5652 | <i>Yersinia pestis</i>            | GCA_001188935.1_ASM118893v1_genomic.fna |
| 5653 | <i>Salmonella enterica</i>        | GCA_000272755.4_ASM27275v4_genomic.fna  |
| 5654 | <i>Bacillus cereus</i>            | GCA_001721145.1_ASM172114v1_genomic.fna |
| 5655 | <i>Lactococcus lactis</i>         | GCA_002148215.1_ASM214821v1_genomic.fna |
| 5656 | <i>Listeria monocytogenes</i>     | GCA_000438665.1_ASM43866v1_genomic.fna  |
| 5657 | <i>Mycobacterium tuberculosis</i> | GCA_000828995.1_ASM82899v1_genomic.fna  |
| 5658 | <i>Escherichia coli</i>           | GCA_000026245.1_ASM2624v1_genomic.fna   |
| 5659 | <i>Helicobacter pylori</i>        | GCA_000270025.1_ASM27002v1_genomic.fna  |
| 5660 | <i>Neisseria meningitidis</i>     | GCA_001697345.1_ASM169734v1_genomic.fna |
| 5661 | <i>Streptococcus pyogenes</i>     | GCA_001019695.1_ASM101969v1_genomic.fna |
| 5662 | <i>Bacillus anthracis</i>         | GCA_001683065.1_ASM168306v1_genomic.fna |
| 5663 | <i>Streptococcus pneumoniae</i>   | GCA_001896065.1_ASM189606v1_genomic.fna |
| 5664 | <i>Pseudomonas aeruginosa</i>     | GCA_001515845.2_ASM151584v2_genomic.fna |
| 5665 | <i>Streptococcus agalactiae</i>   | GCA_002197205.1_ASM219720v1_genomic.fna |
| 5666 | <i>Acinetobacter baumannii</i>    | GCA_001261895.2_R2090_genomic.fna       |
| 5667 | <i>Legionella pneumophila</i>     | GCA_001752925.1_ASM175292v1_genomic.fna |
| 5668 | <i>Chlamydia trachomatis</i>      | GCA_000318905.1_ASM31890v1_genomic.fna  |
| 5669 | <i>Bacillus thuringiensis</i>     | GCA_001618665.1_ASM161866v1_genomic.fna |
| 5670 | <i>Burkholderia pseudomallei</i>  | GCA_000770515.1_ASM77051v1_genomic.fna  |
| 5671 | <i>Francisella tularensis</i>     | GCA_001729565.1_ASM172956v1_genomic.fna |
| 5672 | <i>Xanthomonas citri</i>          | GCA_002139975.1_ASM213997v1_genomic.fna |
| 5673 | <i>Bacillus subtilis</i>          | GCA_001534785.1_ASM153478v1_genomic.fna |
| 5674 | <i>Klebsiella pneumoniae</i>      | GCA_000784985.1_ASM78498v1_genomic.fna  |
| 5675 | <i>Bordetella pertussis</i>       | GCA_001605255.1_ASM160525v1_genomic.fna |

|      |                                           |                                         |
|------|-------------------------------------------|-----------------------------------------|
| 5676 | <i>Mycoplasma pneumoniae</i>              | GCA_002127985.1_ASM212798v1_genomic.fna |
| 5677 | <i>Lactobacillus plantarum</i>            | GCA_002116955.1_ASM211695v1_genomic.fna |
| 5678 | <i>Corynebacterium pseudotuberculosis</i> | GCA_001481715.1_ASM148171v1_genomic.fna |
| 5679 | <i>Bacillus velezensis</i>                | GCA_002205715.1_ASM220571v1_genomic.fna |
| 5680 | <i>Bacillus velezensis</i>                | GCA_002216755.1_ASM221675v1_genomic.fna |
| 5681 | <i>Corynebacterium pseudotuberculosis</i> | GCA_001481755.1_ASM148175v1_genomic.fna |
| 5682 | <i>Streptococcus equinus</i>              | GCA_002073515.1_ASM207351v1_genomic.fna |
| 5683 | <i>Lactobacillus plantarum</i>            | GCA_002117245.1_ASM211724v1_genomic.fna |
| 5684 | <i>Mycoplasma pneumoniae</i>              | GCA_002128005.1_ASM212800v1_genomic.fna |
| 5685 | <i>Bordetella pertussis</i>               | GCA_001605275.1_ASM160527v1_genomic.fna |
| 5686 | <i>Klebsiella pneumoniae</i>              | GCA_000785005.1_ASM78500v1_genomic.fna  |
| 5687 | <i>Bacillus subtilis</i>                  | GCA_001541905.1_ASM154190v1_genomic.fna |
| 5688 | <i>Xanthomonas citri</i>                  | GCA_002139995.1_ASM213999v1_genomic.fna |
| 5689 | <i>Francisella tularensis</i>             | GCA_001729585.1_ASM172958v1_genomic.fna |
| 5690 | <i>Burkholderia pseudomallei</i>          | GCA_000770535.1_ASM77053v1_genomic.fna  |
| 5691 | <i>Bacillus thuringiensis</i>             | GCA_001640965.1_ASM164096v1_genomic.fna |
| 5692 | <i>Chlamydia trachomatis</i>              | GCA_000318925.1_ASM31892v1_genomic.fna  |
| 5693 | <i>Legionella pneumophila</i>             | GCA_001752945.1_ASM175294v1_genomic.fna |
| 5694 | <i>Acinetobacter baumannii</i>            | GCA_001399655.1_ASM139965v1_genomic.fna |
| 5695 | <i>Streptococcus agalactiae</i>           | GCA_002197245.1_ASM219724v1_genomic.fna |
| 5696 | <i>Pseudomonas aeruginosa</i>             | GCA_001515915.2_ASM151591v2_genomic.fna |
| 5697 | <i>Streptococcus pneumoniae</i>           | GCA_001896085.1_ASM189608v1_genomic.fna |
| 5698 | <i>Bacillus anthracis</i>                 | GCA_001683095.1_ASM168309v1_genomic.fna |
| 5699 | <i>Streptococcus pyogenes</i>             | GCA_001020185.2_ASM102018v2_genomic.fna |
| 5700 | <i>Neisseria meningitidis</i>             | GCA_001697365.1_ASM169736v1_genomic.fna |
| 5701 | <i>Helicobacter pylori</i>                | GCA_000270045.1_ASM27004v1_genomic.fna  |
| 5702 | <i>Escherichia coli</i>                   | GCA_000026265.1_ASM2626v1_genomic.fna   |
| 5703 | <i>Mycobacterium tuberculosis</i>         | GCA_000831245.1_ASM83124v1_genomic.fna  |
| 5704 | <i>Listeria monocytogenes</i>             | GCA_000438685.2_ASM43868v2_genomic.fna  |
| 5705 | <i>Bacillus cereus</i>                    | GCA_001880305.1_ASM188030v1_genomic.fna |
| 5706 | <i>Lactococcus lactis</i>                 | GCA_900088425.1_A12_genomic.fna         |
| 5707 | <i>Salmonella enterica</i>                | GCA_000272775.4_ASM27277v4_genomic.fna  |
| 5708 | <i>Yersinia pestis</i>                    | GCA_001293415.1_ASM129341v1_genomic.fna |
| 5709 | <i>Staphylococcus aureus</i>              | GCA_000382965.1_ASM38296v1_genomic.fna  |



|      |                                           |                                         |
|------|-------------------------------------------|-----------------------------------------|
| 5710 | <i>Campylobacter jejuni</i>               | GCA_000934305.1_ASM93430v1_genomic.fna  |
| 5711 | <i>Campylobacter jejuni</i>               | GCA_001299565.1_ASM129956v1_genomic.fna |
| 5712 | <i>Salmonella enterica</i>                | GCA_000272815.2_ASM27281v2_genomic.fna  |
| 5713 | <i>Staphylococcus aureus</i>              | GCA_000382985.1_ASM38298v1_genomic.fna  |
| 5714 | <i>Yersinia pestis</i>                    | GCA_001693595.1_ASM169359v1_genomic.fna |
| 5715 | <i>Bacillus cereus</i>                    | GCA_001941885.1_ASM194188v1_genomic.fna |
| 5716 | <i>Listeria monocytogenes</i>             | GCA_000438705.2_ASM43870v2_genomic.fna  |
| 5717 | <i>Mycobacterium tuberculosis</i>         | GCA_001275565.2_ASM127556v2_genomic.fna |
| 5718 | <i>Helicobacter pylori</i>                | GCA_000270065.1_ASM27006v1_genomic.fna  |
| 5719 | <i>Escherichia coli</i>                   | GCA_000026285.2_ASM2628v2_genomic.fna   |
| 5720 | <i>Neisseria meningitidis</i>             | GCA_001697385.1_ASM169738v1_genomic.fna |
| 5721 | <i>Streptococcus pyogenes</i>             | GCA_001021955.1_ASM102195v1_genomic.fna |
| 5722 | <i>Bacillus anthracis</i>                 | GCA_001683135.1_ASM168313v1_genomic.fna |
| 5723 | <i>Streptococcus pneumoniae</i>           | GCA_001902455.1_ASM190245v1_genomic.fna |
| 5724 | <i>Streptococcus agalactiae</i>           | GCA_002197265.1_ASM219726v1_genomic.fna |
| 5725 | <i>Pseudomonas aeruginosa</i>             | GCA_001516005.1_ASM151600v1_genomic.fna |
| 5726 | <i>Acinetobacter baumannii</i>            | GCA_001457535.1_CIP70.10_genomic.fna    |
| 5727 | <i>Legionella pneumophila</i>             | GCA_001752965.1_ASM175296v1_genomic.fna |
| 5728 | <i>Chlamydia trachomatis</i>              | GCA_000318985.1_ASM31898v1_genomic.fna  |
| 5729 | <i>Bacillus thuringiensis</i>             | GCA_001685565.1_ASM168556v1_genomic.fna |
| 5730 | <i>Burkholderia pseudomallei</i>          | GCA_000770565.1_ASM77056v1_genomic.fna  |
| 5731 | <i>Francisella tularensis</i>             | GCA_001729605.1_ASM172960v1_genomic.fna |
| 5732 | <i>Xanthomonas citri</i>                  | GCA_002163775.1_ASM216377v1_genomic.fna |
| 5733 | <i>Bacillus subtilis</i>                  | GCA_001565875.1_ASM156587v1_genomic.fna |
| 5734 | <i>Klebsiella pneumoniae</i>              | GCA_000807395.3_ASM80739v3_genomic.fna  |
| 5735 | <i>Bordetella pertussis</i>               | GCA_001605295.1_ASM160529v1_genomic.fna |
| 5736 | <i>Mycoplasma pneumoniae</i>              | GCA_002128025.1_ASM212802v1_genomic.fna |
| 5737 | <i>Lactobacillus plantarum</i>            | GCA_002117265.1_ASM211726v1_genomic.fna |
| 5738 | <i>Corynebacterium pseudotuberculosis</i> | GCA_001579825.1_ASM157982v1_genomic.fna |
| 5739 | <i>Bacillus velezensis</i>                | GCA_002237515.1_ASM223751v1_genomic.fna |
| 5740 | <i>Bacillus velezensis</i>                | GCA_002238395.1_ASM223839v1_genomic.fna |
| 5741 | <i>Corynebacterium pseudotuberculosis</i> | GCA_001579865.1_ASM157986v1_genomic.fna |
| 5742 | <i>Lactobacillus plantarum</i>            | GCA_002117285.1_ASM211728v1_genomic.fna |
| 5743 | <i>Mycoplasma pneumoniae</i>              | GCA_002128045.1_ASM212804v1_genomic.fna |

|      |                                   |                                         |
|------|-----------------------------------|-----------------------------------------|
| 5744 | <i>Bordetella pertussis</i>       | GCA_001605345.1_ASM160534v1_genomic.fna |
| 5745 | <i>Klebsiella pneumoniae</i>      | GCA_000813205.1_ASM81320v1_genomic.fna  |
| 5746 | <i>Bacillus subtilis</i>          | GCA_001597265.1_ASM159726v1_genomic.fna |
| 5747 | <i>Xanthomonas citri</i>          | GCA_002218265.1_ASM221826v1_genomic.fna |
| 5748 | <i>Francisella tularensis</i>     | GCA_001865695.1_ASM186569v1_genomic.fna |
| 5749 | <i>Burkholderia pseudomallei</i>  | GCA_000953095.1_BP_3921g_genomic.fna    |
| 5750 | <i>Bacillus thuringiensis</i>     | GCA_001692675.1_ASM169267v1_genomic.fna |
| 5751 | <i>Chlamydia trachomatis</i>      | GCA_000319105.1_ASM31910v1_genomic.fna  |
| 5752 | <i>Legionella pneumophila</i>     | GCA_001753065.1_ASM175306v1_genomic.fna |
| 5753 | <i>Acinetobacter baumannii</i>    | GCA_001514375.1_ASM151437v1_genomic.fna |
| 5754 | <i>Pseudomonas aeruginosa</i>     | GCA_001516105.1_ASM151610v1_genomic.fna |
| 5755 | <i>Streptococcus agalactiae</i>   | GCA_002197285.1_ASM219728v1_genomic.fna |
| 5756 | <i>Bacillus anthracis</i>         | GCA_001683155.1_ASM168315v1_genomic.fna |
| 5757 | <i>Streptococcus pneumoniae</i>   | GCA_002357995.1_ASM235799v1_genomic.fna |
| 5758 | <i>Streptococcus pyogenes</i>     | GCA_001023495.1_ASM102349v1_genomic.fna |
| 5759 | <i>Neisseria meningitidis</i>     | GCA_001697405.1_ASM169740v1_genomic.fna |
| 5760 | <i>Helicobacter pylori</i>        | GCA_000277365.1_ASM27736v1_genomic.fna  |
| 5761 | <i>Mycobacterium tuberculosis</i> | GCA_001544705.1_ASM154470v1_genomic.fna |
| 5762 | <i>Escherichia coli</i>           | GCA_000026545.1_ASM2654v1_genomic.fna   |
| 5763 | <i>Listeria monocytogenes</i>     | GCA_000438725.2_ASM43872v2_genomic.fna  |
| 5764 | <i>Bacillus cereus</i>            | GCA_001941905.1_ASM194190v1_genomic.fna |
| 5765 | <i>Salmonella enterica</i>        | GCA_000272835.4_ASM27283v4_genomic.fna  |
| 5766 | <i>Staphylococcus aureus</i>      | GCA_000383005.1_ASM38300v1_genomic.fna  |
| 5767 | <i>Campylobacter jejuni</i>       | GCA_001299595.1_ASM129959v1_genomic.fna |
| 5768 | <i>Campylobacter jejuni</i>       | GCA_001314285.1_ASM131428v1_genomic.fna |
| 5769 | <i>Salmonella enterica</i>        | GCA_000272895.3_ASM27289v3_genomic.fna  |
| 5770 | <i>Staphylococcus aureus</i>      | GCA_000412775.1_ASM41277v1_genomic.fna  |
| 5771 | <i>Bacillus cereus</i>            | GCA_001941925.1_ASM194192v1_genomic.fna |
| 5772 | <i>Listeria monocytogenes</i>     | GCA_000438745.2_ASM43874v2_genomic.fna  |
| 5773 | <i>Escherichia coli</i>           | GCA_000027125.1_ASM2712v1_genomic.fna   |
| 5774 | <i>Mycobacterium tuberculosis</i> | GCA_001544955.1_ASM154495v1_genomic.fna |
| 5775 | <i>Helicobacter pylori</i>        | GCA_000277385.1_ASM27738v1_genomic.fna  |
| 5776 | <i>Neisseria meningitidis</i>     | GCA_001697425.1_ASM169742v1_genomic.fna |
| 5777 | <i>Streptococcus pyogenes</i>     | GCA_001039695.2_emm89-1_genomic.fna     |

|      |                                           |                                         |
|------|-------------------------------------------|-----------------------------------------|
| 5778 | <i>Bacillus anthracis</i>                 | GCA_001683175.1_ASM168317v1_genomic.fna |
| 5779 | <i>Pseudomonas aeruginosa</i>             | GCA_001516165.2_ASM151616v2_genomic.fna |
| 5780 | <i>Streptococcus agalactiae</i>           | GCA_002197305.1_ASM219730v1_genomic.fna |
| 5781 | <i>Acinetobacter baumannii</i>            | GCA_001517645.1_R2091_genomic.fna       |
| 5782 | <i>Legionella pneumophila</i>             | GCA_001753085.1_ASM175308v1_genomic.fna |
| 5783 | <i>Chlamydia trachomatis</i>              | GCA_000364765.1_ASM36476v1_genomic.fna  |
| 5784 | <i>Burkholderia pseudomallei</i>          | GCA_000954175.1_ASM95417v1_genomic.fna  |
| 5785 | <i>Bacillus thuringiensis</i>             | GCA_001721165.1_ASM172116v1_genomic.fna |
| 5786 | <i>Xanthomonas citri</i>                  | GCA_002218285.1_ASM221828v1_genomic.fna |
| 5787 | <i>Bacillus subtilis</i>                  | GCA_001604995.1_ASM160499v1_genomic.fna |
| 5788 | <i>Klebsiella pneumoniae</i>              | GCA_000814305.1_ASM81430v1_genomic.fna  |
| 5789 | <i>Bordetella pertussis</i>               | GCA_001605365.1_ASM160536v1_genomic.fna |
| 5790 | <i>Mycoplasma pneumoniae</i>              | GCA_002128065.1_ASM212806v1_genomic.fna |
| 5791 | <i>Lactobacillus plantarum</i>            | GCA_002117305.1_ASM211730v1_genomic.fna |
| 5792 | <i>Achromobacter xylosoxidans</i>         | GCA_001558915.1_ASM155891v1_genomic.fna |
| 5793 | <i>Corynebacterium pseudotuberculosis</i> | GCA_001579885.2_ASM157988v2_genomic.fna |
| 5794 | <i>Bacillus velezensis</i>                | GCA_002243325.2_ASM224332v2_genomic.fna |
| 5795 | <i>Bacillus velezensis</i>                | GCA_002310315.1_ASM231031v1_genomic.fna |
| 5796 | <i>Corynebacterium pseudotuberculosis</i> | GCA_001579925.1_ASM157992v1_genomic.fna |
| 5797 | <i>Achromobacter xylosoxidans</i>         | GCA_001559195.1_ASM155919v1_genomic.fna |
| 5798 | <i>Lactobacillus plantarum</i>            | GCA_002173655.1_ASM217365v1_genomic.fna |
| 5799 | <i>Mycoplasma pneumoniae</i>              | GCA_002128085.1_ASM212808v1_genomic.fna |
| 5800 | <i>Bordetella pertussis</i>               | GCA_001605385.1_ASM160538v1_genomic.fna |
| 5801 | <i>Klebsiella pneumoniae</i>              | GCA_000814805.1_ASM81480v1_genomic.fna  |
| 5802 | <i>Bacillus subtilis</i>                  | GCA_001660525.1_ASM166052v1_genomic.fna |
| 5803 | <i>Xanthomonas citri</i>                  | GCA_002224525.1_ASM222452v1_genomic.fna |
| 5804 | <i>Bacillus thuringiensis</i>             | GCA_002025105.1_ASM202510v1_genomic.fna |
| 5805 | <i>Burkholderia pseudomallei</i>          | GCA_000959125.1_ASM95912v1_genomic.fna  |
| 5806 | <i>Chlamydia trachomatis</i>              | GCA_000364785.1_ASM36478v1_genomic.fna  |
| 5807 | <i>Legionella pneumophila</i>             | GCA_001753105.1_ASM175310v1_genomic.fna |
| 5808 | <i>Acinetobacter baumannii</i>            | GCA_001543995.1_ASM154399v1_genomic.fna |
| 5809 | <i>Streptococcus agalactiae</i>           | GCA_002197325.1_ASM219732v1_genomic.fna |
| 5810 | <i>Pseudomonas aeruginosa</i>             | GCA_001516185.2_ASM151618v2_genomic.fna |
| 5811 | <i>Bacillus anthracis</i>                 | GCA_001683195.1_ASM168319v1_genomic.fna |

|      |                                   |                                         |
|------|-----------------------------------|-----------------------------------------|
| 5812 | <i>Streptococcus pyogenes</i>     | GCA_001051095.1_ASM105109v1_genomic.fna |
| 5813 | <i>Neisseria meningitidis</i>     | GCA_001697445.1_ASM169744v1_genomic.fna |
| 5814 | <i>Helicobacter pylori</i>        | GCA_000277405.1_ASM27740v1_genomic.fna  |
| 5815 | <i>Mycobacterium tuberculosis</i> | GCA_001545015.1_ASM154501v1_genomic.fna |
| 5816 | <i>Escherichia coli</i>           | GCA_000091005.1_ASM9100v1_genomic.fna   |
| 5817 | <i>Listeria monocytogenes</i>     | GCA_000513595.1_ASM51359v1_genomic.fna  |
| 5818 | <i>Bacillus cereus</i>            | GCA_002000005.1_ASM200000v1_genomic.fna |
| 5819 | <i>Staphylococcus aureus</i>      | GCA_000418345.1_ASM41834v1_genomic.fna  |
| 5820 | <i>Salmonella enterica</i>        | GCA_000280315.2_ASM28031v2_genomic.fna  |
| 5821 | <i>Campylobacter jejuni</i>       | GCA_001412295.1_ASM141229v1_genomic.fna |
| 5822 | <i>Salmonella enterica</i>        | GCA_000283735.1_ASM28373v1_genomic.fna  |
| 5823 | <i>Campylobacter jejuni</i>       | GCA_001457695.1_NCTC11351_genomic.fna   |
| 5824 | <i>Staphylococcus aureus</i>      | GCA_000452385.2_ASM45238v2_genomic.fna  |
| 5825 | <i>Bacillus cereus</i>            | GCA_002214705.1_ASM221470v1_genomic.fna |
| 5826 | <i>Listeria monocytogenes</i>     | GCA_000513615.1_ASM51361v1_genomic.fna  |
| 5827 | <i>Escherichia coli</i>           | GCA_000147855.3_ASM14785v3_genomic.fna  |
| 5828 | <i>Mycobacterium tuberculosis</i> | GCA_001702435.1_ASM170243v1_genomic.fna |
| 5829 | <i>Helicobacter pylori</i>        | GCA_000277425.1_ASM27742v1_genomic.fna  |
| 5830 | <i>Neisseria meningitidis</i>     | GCA_001697465.1_ASM169746v1_genomic.fna |
| 5831 | <i>Streptococcus pyogenes</i>     | GCA_001267805.1_ASM126780v1_genomic.fna |
| 5832 | <i>Bacillus anthracis</i>         | GCA_001683215.1_ASM168321v1_genomic.fna |
| 5833 | <i>Pseudomonas aeruginosa</i>     | GCA_001516205.2_ASM151620v2_genomic.fna |
| 5834 | <i>Streptococcus agalactiae</i>   | GCA_002197365.1_ASM219736v1_genomic.fna |
| 5835 | <i>Acinetobacter baumannii</i>    | GCA_001573065.1_ASM157306v1_genomic.fna |
| 5836 | <i>Legionella pneumophila</i>     | GCA_001753125.1_ASM175312v1_genomic.fna |
| 5837 | <i>Chlamydia trachomatis</i>      | GCA_000441585.1_ASM44158v1_genomic.fna  |
| 5838 | <i>Burkholderia pseudomallei</i>  | GCA_000959145.1_ASM95914v1_genomic.fna  |
| 5839 | <i>Bacillus thuringiensis</i>     | GCA_002119445.1_ASM211944v1_genomic.fna |
| 5840 | <i>Xanthomonas citri</i>          | GCA_002224545.1_ASM222454v1_genomic.fna |
| 5841 | <i>Bacillus subtilis</i>          | GCA_001697265.1_ASM169726v1_genomic.fna |
| 5842 | <i>Klebsiella pneumoniae</i>      | GCA_000968155.1_ASM96815v1_genomic.fna  |
| 5843 | <i>Bordetella pertussis</i>       | GCA_001605405.1_ASM160540v1_genomic.fna |
| 5844 | <i>Mycoplasma pneumoniae</i>      | GCA_002128105.1_ASM212810v1_genomic.fna |
| 5845 | <i>Lactobacillus plantarum</i>    | GCA_002174195.1_ASM217419v1_genomic.fna |

|      |                                              |                                         |
|------|----------------------------------------------|-----------------------------------------|
| 5846 | <i>Corynebacterium pseudotuberculosis</i>    | GCA_001653295.1_ASM165329v1_genomic.fna |
| 5847 | <i>Aeromonas veronii</i>                     | GCA_001634345.1_ASM163434v1_genomic.fna |
| 5848 | <i>Bacillus velezensis</i>                   | GCA_002327165.1_ASM232716v1_genomic.fna |
| 5849 | <i>Corynebacterium pseudotuberculosis</i>    | GCA_001653315.1_ASM165331v1_genomic.fna |
| 5850 | <i>Aggregatibacter actinomycetemcomitans</i> | GCA_000241025.2_ASM24102v2_genomic.fna  |
| 5851 | <i>Lactobacillus plantarum</i>               | GCA_002205775.2_ASM220577v2_genomic.fna |
| 5852 | <i>Mycoplasma pneumoniae</i>                 | GCA_002128125.1_ASM212812v1_genomic.fna |
| 5853 | <i>Bordetella pertussis</i>                  | GCA_001605425.1_ASM160542v1_genomic.fna |
| 5854 | <i>Haemophilus parasuis</i>                  | GCA_000439395.1_ASM43939v1_genomic.fna  |
| 5855 | <i>Klebsiella pneumoniae</i>                 | GCA_000981845.1_ASM98184v1_genomic.fna  |
| 5856 | <i>Bacillus subtilis</i>                     | GCA_001703495.1_ASM170349v1_genomic.fna |
| 5857 | <i>Xanthomonas citri</i>                     | GCA_002288565.1_ASM228856v1_genomic.fna |
| 5858 | <i>Bacillus thuringiensis</i>                | GCA_002173755.1_ASM217375v1_genomic.fna |
| 5859 | <i>Burkholderia pseudomallei</i>             | GCA_000959185.1_ASM95918v1_genomic.fna  |
| 5860 | <i>Chlamydia trachomatis</i>                 | GCA_000441615.1_ASM44161v1_genomic.fna  |
| 5861 | <i>Legionella pneumophila</i>                | GCA_001753145.1_ASM175314v1_genomic.fna |
| 5862 | <i>Acinetobacter baumannii</i>               | GCA_001573085.1_ASM157308v1_genomic.fna |
| 5863 | <i>Streptococcus agalactiae</i>              | GCA_002197385.1_ASM219738v1_genomic.fna |
| 5864 | <i>Pseudomonas aeruginosa</i>                | GCA_001516225.2_ASM151622v2_genomic.fna |
| 5865 | <i>Bacillus anthracis</i>                    | GCA_001683235.1_ASM168323v1_genomic.fna |
| 5866 | <i>Streptococcus pyogenes</i>                | GCA_001267845.1_ASM126784v1_genomic.fna |
| 5867 | <i>Neisseria meningitidis</i>                | GCA_001697485.1_ASM169748v1_genomic.fna |
| 5868 | <i>Helicobacter pylori</i>                   | GCA_000307795.1_ASM30779v1_genomic.fna  |
| 5869 | <i>Mycobacterium tuberculosis</i>            | GCA_001708265.1_ASM170826v1_genomic.fna |
| 5870 | <i>Escherichia coli</i>                      | GCA_000148365.1_ASM14836v1_genomic.fna  |
| 5871 | <i>Listeria monocytogenes</i>                | GCA_000513635.1_ASM51363v1_genomic.fna  |
| 5872 | <i>Bacillus cereus</i>                       | GCA_002214725.1_ASM221472v1_genomic.fna |
| 5873 | <i>Staphylococcus aureus</i>                 | GCA_000462955.1_ASM46295v1_genomic.fna  |
| 5874 | <i>Campylobacter jejuni</i>                  | GCA_001506185.1_ASM150618v1_genomic.fna |
| 5875 | <i>Salmonella enterica</i>                   | GCA_000329365.2_ASM32936v2_genomic.fna  |
| 5876 | <i>Salmonella enterica</i>                   | GCA_000330485.2_ASM33048v2_genomic.fna  |
| 5877 | <i>Campylobacter jejuni</i>                  | GCA_001506205.1_ASM150620v1_genomic.fna |
| 5878 | <i>Staphylococcus aureus</i>                 | GCA_000463055.1_ASM46305v1_genomic.fna  |
| 5879 | <i>Bacillus cereus</i>                       | GCA_002214765.1_ASM221476v1_genomic.fna |

|      |                                              |                                         |
|------|----------------------------------------------|-----------------------------------------|
| 5880 | <i>Listeria monocytogenes</i>                | GCA_000513655.1_ASM51365v1_genomic.fna  |
| 5881 | <i>Escherichia coli</i>                      | GCA_000148605.1_ASM14860v1_genomic.fna  |
| 5882 | <i>Prochlorococcus marinus</i>               | GCA_000015705.1_ASM1570v1_genomic.fna   |
| 5883 | <i>Mycobacterium tuberculosis</i>            | GCA_001750865.1_ASM175086v1_genomic.fna |
| 5884 | <i>Helicobacter pylori</i>                   | GCA_000307815.1_ASM30781v1_genomic.fna  |
| 5885 | <i>Neisseria meningitidis</i>                | GCA_001697505.1_ASM169750v1_genomic.fna |
| 5886 | <i>Streptococcus pyogenes</i>                | GCA_001535565.1_ASM153556v1_genomic.fna |
| 5887 | <i>Bacillus anthracis</i>                    | GCA_001683255.1_ASM168325v1_genomic.fna |
| 5888 | <i>Pseudomonas aeruginosa</i>                | GCA_001516245.2_ASM151624v2_genomic.fna |
| 5889 | <i>Streptococcus agalactiae</i>              | GCA_002197425.1_ASM219742v1_genomic.fna |
| 5890 | <i>Acinetobacter baumannii</i>               | GCA_001573105.1_ASM157310v1_genomic.fna |
| 5891 | <i>Legionella pneumophila</i>                | GCA_001753265.1_ASM175326v1_genomic.fna |
| 5892 | <i>Chlamydia trachomatis</i>                 | GCA_000441635.1_ASM44163v1_genomic.fna  |
| 5893 | <i>Burkholderia pseudomallei</i>             | GCA_000959205.1_ASM95920v1_genomic.fna  |
| 5894 | <i>Bacillus thuringiensis</i>                | GCA_002184245.1_ASM218424v1_genomic.fna |
| 5895 | <i>Xanthomonas citri</i>                     | GCA_002288585.1_ASM228858v1_genomic.fna |
| 5896 | <i>Bacillus subtilis</i>                     | GCA_001704095.1_ASM170409v1_genomic.fna |
| 5897 | <i>Klebsiella pneumoniae</i>                 | GCA_001022035.1_ASM102203v1_genomic.fna |
| 5898 | <i>Bordetella pertussis</i>                  | GCA_001605445.1_ASM160544v1_genomic.fna |
| 5899 | <i>Mycoplasma pneumoniae</i>                 | GCA_002128145.1_ASM212814v1_genomic.fna |
| 5900 | <i>Lactobacillus plantarum</i>               | GCA_002220175.1_ASM222017v1_genomic.fna |
| 5901 | <i>Aggregatibacter actinomycetemcomitans</i> | GCA_001547775.1_ASM154777v1_genomic.fna |
| 5902 | <i>Corynebacterium pseudotuberculosis</i>    | GCA_001663495.1_ASM166349v1_genomic.fna |
| 5903 | <i>Corynebacterium pseudotuberculosis</i>    | GCA_001682255.1_ASM168225v1_genomic.fna |
| 5904 | <i>Lactobacillus plantarum</i>               | GCA_002220815.1_ASM222081v1_genomic.fna |
| 5905 | <i>Mycoplasma pneumoniae</i>                 | GCA_002128165.1_ASM212816v1_genomic.fna |
| 5906 | <i>Bordetella pertussis</i>                  | GCA_001605465.1_ASM160546v1_genomic.fna |
| 5907 | <i>Klebsiella pneumoniae</i>                 | GCA_001022175.1_ASM102217v1_genomic.fna |
| 5908 | <i>Bacillus subtilis</i>                     | GCA_001720505.1_ASM172050v1_genomic.fna |
| 5909 | <i>Bacillus thuringiensis</i>                | GCA_002192515.1_ASM219251v1_genomic.fna |
| 5910 | <i>Burkholderia pseudomallei</i>             | GCA_000959225.1_ASM95922v1_genomic.fna  |
| 5911 | <i>Chlamydia trachomatis</i>                 | GCA_000441655.1_ASM44165v1_genomic.fna  |
| 5912 | <i>Legionella pneumophila</i>                | GCA_001753285.1_ASM175328v1_genomic.fna |
| 5913 | <i>Acinetobacter baumannii</i>               | GCA_001573125.1_ASM157312v1_genomic.fna |

|      |                                   |                                         |
|------|-----------------------------------|-----------------------------------------|
| 5914 | <i>Streptococcus agalactiae</i>   | GCA_002214425.1_ASM221442v1_genomic.fna |
| 5915 | <i>Pseudomonas aeruginosa</i>     | GCA_001516265.1_ASM151626v1_genomic.fna |
| 5916 | <i>Bacillus anthracis</i>         | GCA_001683275.1_ASM168327v1_genomic.fna |
| 5917 | <i>Streptococcus pyogenes</i>     | GCA_001547715.1_ASM154771v1_genomic.fna |
| 5918 | <i>Neisseria meningitidis</i>     | GCA_001697525.1_ASM169752v1_genomic.fna |
| 5919 | <i>Helicobacter pylori</i>        | GCA_000307835.1_ASM30783v1_genomic.fna  |
| 5920 | <i>Mycobacterium tuberculosis</i> | GCA_001855255.1_ASM185525v1_genomic.fna |
| 5921 | <i>Escherichia coli</i>           | GCA_000184185.1_ASM18418v1_genomic.fna  |
| 5922 | <i>Listeria monocytogenes</i>     | GCA_000513675.1_ASM51367v1_genomic.fna  |
| 5923 | <i>Bacillus cereus</i>            | GCA_002215175.1_ASM221517v1_genomic.fna |
| 5924 | <i>Campylobacter jejuni</i>       | GCA_001506225.1_ASM150622v1_genomic.fna |
| 5925 | <i>Salmonella enterica</i>        | GCA_000335875.2_ASM33587v2_genomic.fna  |
| 5926 | <i>Staphylococcus aureus</i>      | GCA_000470845.1_ASM47084v1_genomic.fna  |
| 5927 | <i>Staphylococcus aureus</i>      | GCA_000470865.1_ASM47086v1_genomic.fna  |
| 5928 | <i>Salmonella enterica</i>        | GCA_000335995.2_ASM33599v2_genomic.fna  |
| 5929 | <i>Campylobacter jejuni</i>       | GCA_001506245.1_ASM150624v1_genomic.fna |
| 5930 | <i>Bacillus cereus</i>            | GCA_002216125.1_ASM221612v1_genomic.fna |
| 5931 | <i>Listeria monocytogenes</i>     | GCA_000513695.1_ASM51369v1_genomic.fna  |
| 5932 | <i>Escherichia coli</i>           | GCA_000210475.1_ASM21047v1_genomic.fna  |
| 5933 | <i>Mycobacterium tuberculosis</i> | GCA_001870145.1_ASM187014v1_genomic.fna |
| 5934 | <i>Helicobacter pylori</i>        | GCA_000315955.1_ASM31595v1_genomic.fna  |
| 5935 | <i>Neisseria meningitidis</i>     | GCA_001697545.1_ASM169754v1_genomic.fna |
| 5936 | <i>Streptococcus pyogenes</i>     | GCA_001547835.1_ASM154783v1_genomic.fna |
| 5937 | <i>Bacillus anthracis</i>         | GCA_001683295.1_ASM168329v1_genomic.fna |
| 5938 | <i>Pseudomonas aeruginosa</i>     | GCA_001516305.2_ASM151630v2_genomic.fna |
| 5939 | <i>Streptococcus agalactiae</i>   | GCA_002289205.1_ASM228920v1_genomic.fna |
| 5940 | <i>Acinetobacter baumannii</i>    | GCA_001578145.1_ASM157814v1_genomic.fna |
| 5941 | <i>Legionella pneumophila</i>     | GCA_001753305.1_ASM175330v1_genomic.fna |
| 5942 | <i>Chlamydia trachomatis</i>      | GCA_000441675.1_ASM44167v1_genomic.fna  |
| 5943 | <i>Burkholderia pseudomallei</i>  | GCA_000959265.1_ASM95926v1_genomic.fna  |
| 5944 | <i>Bacillus thuringiensis</i>     | GCA_002222555.1_ASM222255v1_genomic.fna |
| 5945 | <i>Bacillus subtilis</i>          | GCA_001746575.1_ASM174657v1_genomic.fna |
| 5946 | <i>Klebsiella pneumoniae</i>      | GCA_001022235.1_ASM102223v1_genomic.fna |
| 5947 | <i>Bordetella pertussis</i>       | GCA_001605485.1_ASM160548v1_genomic.fna |

|      |                                           |                                         |
|------|-------------------------------------------|-----------------------------------------|
| 5948 | <i>Mycoplasma pneumoniae</i>              | GCA_002128185.1_ASM212818v1_genomic.fna |
| 5949 | <i>Lactobacillus plantarum</i>            | GCA_002286275.1_ASM228627v1_genomic.fna |
| 5950 | <i>Burkholderia vietnamiensis</i>         | GCA_000016205.1_ASM1620v1_genomic.fna   |
| 5951 | <i>Staphylococcus saprophyticus</i>       | GCA_002208905.1_ASM220890v1_genomic.fna |
| 5952 | <i>Corynebacterium pseudotuberculosis</i> | GCA_001682275.1_ASM168227v1_genomic.fna |
| 5953 | <i>Corynebacterium pseudotuberculosis</i> | GCA_001865765.1_ASM186576v1_genomic.fna |
| 5954 | <i>Staphylococcus saprophyticus</i>       | GCA_002209265.1_ASM220926v1_genomic.fna |
| 5955 | <i>Lactobacillus plantarum</i>            | GCA_002290185.1_ASM229018v1_genomic.fna |
| 5956 | <i>Mycoplasma pneumoniae</i>              | GCA_002128205.1_ASM212820v1_genomic.fna |
| 5957 | <i>Bordetella pertussis</i>               | GCA_001605505.1_ASM160550v1_genomic.fna |
| 5958 | <i>Rhizobium leguminosarum</i>            | GCA_001679785.1_ASM167978v1_genomic.fna |
| 5959 | <i>Klebsiella pneumoniae</i>              | GCA_001280925.1_ASM128092v1_genomic.fna |
| 5960 | <i>Bacillus subtilis</i>                  | GCA_001747445.1_ASM174744v1_genomic.fna |
| 5961 | <i>Bacillus thuringiensis</i>             | GCA_002243685.1_ASM224368v1_genomic.fna |
| 5962 | <i>Burkholderia pseudomallei</i>          | GCA_000959285.1_ASM95928v1_genomic.fna  |
| 5963 | <i>Chlamydia trachomatis</i>              | GCA_000441695.1_ASM44169v1_genomic.fna  |
| 5964 | <i>Legionella pneumophila</i>             | GCA_001753325.1_ASM175332v1_genomic.fna |
| 5965 | <i>Acinetobacter baumannii</i>            | GCA_001593425.2_ASM159342v2_genomic.fna |
| 5966 | <i>Streptococcus agalactiae</i>           | GCA_900078265.1_SA111_genomic.fna       |
| 5967 | <i>Pseudomonas aeruginosa</i>             | GCA_001516325.2_ASM151632v2_genomic.fna |
| 5968 | <i>Bacillus anthracis</i>                 | GCA_001936375.1_ASM193637v1_genomic.fna |
| 5969 | <i>Streptococcus pyogenes</i>             | GCA_001559175.1_ASM155917v1_genomic.fna |
| 5970 | <i>Neisseria meningitidis</i>             | GCA_001697565.1_ASM169756v1_genomic.fna |
| 5971 | <i>Helicobacter pylori</i>                | GCA_000317875.1_ASM31787v1_genomic.fna  |
| 5972 | <i>Mycobacterium tuberculosis</i>         | GCA_001895765.1_ASM189576v1_genomic.fna |
| 5973 | <i>Escherichia coli</i>                   | GCA_000212715.2_ASM21271v2_genomic.fna  |
| 5974 | <i>Listeria monocytogenes</i>             | GCA_000568475.1_ASM56847v1_genomic.fna  |
| 5975 | <i>Bacillus cereus</i>                    | GCA_002220285.1_ASM222028v1_genomic.fna |
| 5976 | <i>Campylobacter jejuni</i>               | GCA_001506265.1_ASM150626v1_genomic.fna |
| 5977 | <i>Salmonella enterica</i>                | GCA_000341425.1_ASM34142v1_genomic.fna  |
| 5978 | <i>Staphylococcus aureus</i>              | GCA_000485885.1_ASM48588v1_genomic.fna  |
| 5979 | <i>Staphylococcus aureus</i>              | GCA_000568455.1_ASM56845v1_genomic.fna  |
| 5980 | <i>Salmonella enterica</i>                | GCA_000380325.1_ASM38032v1_genomic.fna  |
| 5981 | <i>Campylobacter jejuni</i>               | GCA_001506285.1_ASM150628v1_genomic.fna |



|      |                                           |                                         |
|------|-------------------------------------------|-----------------------------------------|
| 5982 | <i>Bacillus cereus</i>                    | GCA_002224345.1_ASM222434v1_genomic.fna |
| 5983 | <i>Listeria monocytogenes</i>             | GCA_000568935.1_ASM56893v1_genomic.fna  |
| 5984 | <i>Escherichia coli</i>                   | GCA_000219515.3_ASM21951v3_genomic.fna  |
| 5985 | <i>Mycobacterium tuberculosis</i>         | GCA_001895785.1_ASM189578v1_genomic.fna |
| 5986 | <i>Helicobacter pylori</i>                | GCA_000348865.1_ASM34886v1_genomic.fna  |
| 5987 | <i>Neisseria meningitidis</i>             | GCA_001697585.1_ASM169758v1_genomic.fna |
| 5988 | <i>Streptococcus pyogenes</i>             | GCA_001620285.1_ASM162028v1_genomic.fna |
| 5989 | <i>Bacillus anthracis</i>                 | GCA_001990245.1_ASM199024v1_genomic.fna |
| 5990 | <i>Streptococcus agalactiae</i>           | GCA_900155855.1_BM110_genomic.fna       |
| 5991 | <i>Pseudomonas aeruginosa</i>             | GCA_001516345.1_ASM151634v1_genomic.fna |
| 5992 | <i>Acinetobacter baumannii</i>            | GCA_001636235.1_ASM163623v1_genomic.fna |
| 5993 | <i>Legionella pneumophila</i>             | GCA_001753345.1_ASM175334v1_genomic.fna |
| 5994 | <i>Chlamydia trachomatis</i>              | GCA_000441715.1_ASM44171v1_genomic.fna  |
| 5995 | <i>Burkholderia pseudomallei</i>          | GCA_000959305.1_ASM95930v1_genomic.fna  |
| 5996 | <i>Bacillus subtilis</i>                  | GCA_001808235.1_ASM180823v1_genomic.fna |
| 5997 | <i>Klebsiella pneumoniae</i>              | GCA_001307175.1_ASM130717v1_genomic.fna |
| 5998 | <i>Bordetella pertussis</i>               | GCA_001605525.1_ASM160552v1_genomic.fna |
| 5999 | <i>Mycoplasma pneumoniae</i>              | GCA_002128235.1_ASM212823v1_genomic.fna |
| 6000 | <i>Lactobacillus plantarum</i>            | GCA_002576835.1_ASM257683v1_genomic.fna |
| 6001 | <i>Corynebacterium pseudotuberculosis</i> | GCA_001866985.1_ASM186698v1_genomic.fna |
| 6002 | <i>Corynebacterium pseudotuberculosis</i> | GCA_001867005.1_ASM186700v1_genomic.fna |
| 6003 | <i>Mycoplasma pneumoniae</i>              | GCA_002128265.1_ASM212826v1_genomic.fna |
| 6004 | <i>Bordetella pertussis</i>               | GCA_001605545.1_ASM160554v1_genomic.fna |
| 6005 | <i>Klebsiella pneumoniae</i>              | GCA_001455995.1_MS6671.v1_genomic.fna   |
| 6006 | <i>Bacillus subtilis</i>                  | GCA_001889385.1_ASM188938v1_genomic.fna |
| 6007 | <i>Burkholderia pseudomallei</i>          | GCA_000959345.1_ASM95934v1_genomic.fna  |
| 6008 | <i>Chlamydia trachomatis</i>              | GCA_000441735.1_ASM44173v1_genomic.fna  |
| 6009 | <i>Legionella pneumophila</i>             | GCA_001753365.1_ASM175336v1_genomic.fna |
| 6010 | <i>Acinetobacter baumannii</i>            | GCA_001806345.1_ASM180634v1_genomic.fna |
| 6011 | <i>Pseudomonas aeruginosa</i>             | GCA_001516365.2_ASM151636v2_genomic.fna |
| 6012 | <i>Bacillus anthracis</i>                 | GCA_002277915.1_ASM227791v1_genomic.fna |
| 6013 | <i>Streptococcus pyogenes</i>             | GCA_001635895.1_ASM163589v1_genomic.fna |
| 6014 | <i>Neisseria meningitidis</i>             | GCA_001697605.1_ASM169760v1_genomic.fna |
| 6015 | <i>Helicobacter pylori</i>                | GCA_000348885.1_ASM34888v1_genomic.fna  |

|      |                                           |                                           |
|------|-------------------------------------------|-------------------------------------------|
| 6016 | <i>Mycobacterium tuberculosis</i>         | GCA_001895805.1_ASM189580v1_genomic.fna   |
| 6017 | <i>Escherichia coli</i>                   | GCA_000227625.1_ASM22762v1_genomic.fna    |
| 6018 | <i>Listeria monocytogenes</i>             | GCA_000577745.1_6179_18022011_genomic.fna |
| 6019 | <i>Bacillus cereus</i>                    | GCA_002290105.1_ASM229010v1_genomic.fna   |
| 6020 | <i>Campylobacter jejuni</i>               | GCA_001506305.1_ASM150630v1_genomic.fna   |
| 6021 | <i>Salmonella enterica</i>                | GCA_000385905.1_ASM38590v1_genomic.fna    |
| 6022 | <i>Staphylococcus aureus</i>              | GCA_000597965.1_ASM59796v1_genomic.fna    |
| 6023 | <i>Staphylococcus aureus</i>              | GCA_000626615.1_ASM62661v1_genomic.fna    |
| 6024 | <i>Salmonella enterica</i>                | GCA_000430085.2_ASM43008v2_genomic.fna    |
| 6025 | <i>Campylobacter jejuni</i>               | GCA_001506345.1_ASM150634v1_genomic.fna   |
| 6026 | <i>Listeria monocytogenes</i>             | GCA_000582845.1_SV_1_genomic.fna          |
| 6027 | <i>Escherichia coli</i>                   | GCA_000233875.1_ASM23387v1_genomic.fna    |
| 6028 | <i>Mycobacterium tuberculosis</i>         | GCA_001895825.1_ASM189582v1_genomic.fna   |
| 6029 | <i>Helicobacter pylori</i>                | GCA_000392455.3_ASM39245v3_genomic.fna    |
| 6030 | <i>Neisseria meningitidis</i>             | GCA_001697625.1_ASM169762v1_genomic.fna   |
| 6031 | <i>Streptococcus pyogenes</i>             | GCA_001635935.1_ASM163593v1_genomic.fna   |
| 6032 | <i>Bacillus anthracis</i>                 | GCA_002356575.1_ASM235657v1_genomic.fna   |
| 6033 | <i>Pseudomonas aeruginosa</i>             | GCA_001516385.1_ASM151638v1_genomic.fna   |
| 6034 | <i>Acinetobacter baumannii</i>            | GCA_001806365.1_ASM180636v1_genomic.fna   |
| 6035 | <i>Legionella pneumophila</i>             | GCA_001753385.1_ASM175338v1_genomic.fna   |
| 6036 | <i>Chlamydia trachomatis</i>              | GCA_000441755.1_ASM44175v1_genomic.fna    |
| 6037 | <i>Burkholderia pseudomallei</i>          | GCA_001277875.1_ASM127787v1_genomic.fna   |
| 6038 | <i>Bacillus subtilis</i>                  | GCA_001889625.1_ASM188962v1_genomic.fna   |
| 6039 | <i>Klebsiella pneumoniae</i>              | GCA_001456055.3_ASM145605v3_genomic.fna   |
| 6040 | <i>Bordetella pertussis</i>               | GCA_001605565.1_ASM160556v1_genomic.fna   |
| 6041 | <i>Mycoplasma pneumoniae</i>              | GCA_002128285.1_ASM212828v1_genomic.fna   |
| 6042 | <i>Pectobacterium carotovorum</i>         | GCA_000769535.1_ASM76953v1_genomic.fna    |
| 6043 | <i>Corynebacterium pseudotuberculosis</i> | GCA_001867025.1_ASM186702v1_genomic.fna   |
| 6044 | <i>Kingella kingae</i>                    | GCA_001458475.1_KKKWG1_genomic.fna        |
| 6045 | <i>Corynebacterium pseudotuberculosis</i> | GCA_001867045.1_ASM186704v1_genomic.fna   |
| 6046 | <i>Mycoplasma pneumoniae</i>              | GCA_002147855.1_ASM214785v1_genomic.fna   |
| 6047 | <i>Bordetella pertussis</i>               | GCA_001605585.1_ASM160558v1_genomic.fna   |
| 6048 | <i>Klebsiella pneumoniae</i>              | GCA_001456095.3_ASM145609v3_genomic.fna   |
| 6049 | <i>Bacillus subtilis</i>                  | GCA_001890405.1_ASM189040v1_genomic.fna   |

|      |                                           |                                            |
|------|-------------------------------------------|--------------------------------------------|
| 6050 | <i>Burkholderia pseudomallei</i>          | GCA_001277895.1_ASM127789v1_genomic.fna    |
| 6051 | <i>Chlamydia trachomatis</i>              | GCA_000441775.1_ASM44177v1_genomic.fna     |
| 6052 | <i>Legionella pneumophila</i>             | GCA_001753405.1_ASM175340v1_genomic.fna    |
| 6053 | <i>Acinetobacter baumannii</i>            | GCA_001806385.1_ASM180638v1_genomic.fna    |
| 6054 | <i>Pseudomonas aeruginosa</i>             | GCA_001518975.1_ASM151897v1_genomic.fna    |
| 6055 | <i>Streptococcus pyogenes</i>             | GCA_001635975.1_ASM163597v1_genomic.fna    |
| 6056 | <i>Neisseria meningitidis</i>             | GCA_001697645.1_ASM169764v1_genomic.fna    |
| 6057 | <i>Helicobacter pylori</i>                | GCA_000392475.3_ASM39247v3_genomic.fna     |
| 6058 | <i>Mycobacterium tuberculosis</i>         | GCA_001895845.1_ASM189584v1_genomic.fna    |
| 6059 | <i>Escherichia coli</i>                   | GCA_000233895.1_ASM23389v1_genomic.fna     |
| 6060 | <i>Listeria monocytogenes</i>             | GCA_000600015.1_ASM60001v1_genomic.fna     |
| 6061 | <i>Campylobacter jejuni</i>               | GCA_001506365.1_ASM150636v1_genomic.fna    |
| 6062 | <i>Staphylococcus aureus</i>              | GCA_000695215.1_ASM69521v1_genomic.fna     |
| 6063 | <i>Salmonella enterica</i>                | GCA_000430105.1_ASM43010v1_genomic.fna     |
| 6064 | <i>Salmonella enterica</i>                | GCA_000430125.1_ASM43012v1_genomic.fna     |
| 6065 | <i>Campylobacter jejuni</i>               | GCA_001506385.1_ASM150638v1_genomic.fna    |
| 6066 | <i>Staphylococcus aureus</i>              | GCA_000695875.1_ASM69587v1_genomic.fna     |
| 6067 | <i>Listeria monocytogenes</i>             | GCA_000613085.1_R479A_18022011_genomic.fna |
| 6068 | <i>Escherichia coli</i>                   | GCA_000245515.1_ASM24551v1_genomic.fna     |
| 6069 | <i>Mycobacterium tuberculosis</i>         | GCA_001895865.1_ASM189586v1_genomic.fna    |
| 6070 | <i>Helicobacter pylori</i>                | GCA_000392515.3_ASM39251v3_genomic.fna     |
| 6071 | <i>Neisseria meningitidis</i>             | GCA_001697665.1_ASM169766v1_genomic.fna    |
| 6072 | <i>Streptococcus pyogenes</i>             | GCA_001638845.2_ASM163884v2_genomic.fna    |
| 6073 | <i>Pseudomonas aeruginosa</i>             | GCA_001542795.2_ASM154279v2_genomic.fna    |
| 6074 | <i>Acinetobacter baumannii</i>            | GCA_001806405.1_ASM180640v1_genomic.fna    |
| 6075 | <i>Legionella pneumophila</i>             | GCA_001766275.1_ASM176627v1_genomic.fna    |
| 6076 | <i>Chlamydia trachomatis</i>              | GCA_000441795.1_ASM44179v1_genomic.fna     |
| 6077 | <i>Burkholderia pseudomallei</i>          | GCA_001277975.1_ASM127797v1_genomic.fna    |
| 6078 | <i>Bacillus subtilis</i>                  | GCA_001902555.1_ASM190255v1_genomic.fna    |
| 6079 | <i>Porphyromonas gingivalis</i>           | GCA_001444325.1_ASM144432v1_genomic.fna    |
| 6080 | <i>Klebsiella pneumoniae</i>              | GCA_001456135.1_ASM145613v1_genomic.fna    |
| 6081 | <i>Bordetella pertussis</i>               | GCA_001605605.1_ASM160560v1_genomic.fna    |
| 6082 | <i>Mycoplasma pneumoniae</i>              | GCA_002355695.1_ASM235569v1_genomic.fna    |
| 6083 | <i>Corynebacterium pseudotuberculosis</i> | GCA_001867065.1_ASM186706v1_genomic.fna    |

|      |                                           |                                         |
|------|-------------------------------------------|-----------------------------------------|
| 6084 | <i>Corynebacterium pseudotuberculosis</i> | GCA_001867085.1_ASM186708v1_genomic.fna |
| 6085 | <i>Mycoplasma pneumoniae</i>              | GCA_002355715.1_ASM235571v1_genomic.fna |
| 6086 | <i>Bordetella pertussis</i>               | GCA_001605625.1_ASM160562v1_genomic.fna |
| 6087 | <i>Klebsiella pneumoniae</i>              | GCA_001482345.1_ASM148234v1_genomic.fna |
| 6088 | <i>Bacillus subtilis</i>                  | GCA_002055965.1_ASM205596v1_genomic.fna |
| 6089 | <i>Burkholderia pseudomallei</i>          | GCA_001318245.1_ASM131824v1_genomic.fna |
| 6090 | <i>Chlamydia trachomatis</i>              | GCA_000441815.1_ASM44181v1_genomic.fna  |
| 6091 | <i>Legionella pneumophila</i>             | GCA_001766295.1_ASM176629v1_genomic.fna |
| 6092 | <i>Acinetobacter baumannii</i>            | GCA_001806425.1_ASM180642v1_genomic.fna |
| 6093 | <i>Pseudomonas aeruginosa</i>             | GCA_001542835.1_ASM154283v1_genomic.fna |
| 6094 | <i>Streptococcus pyogenes</i>             | GCA_001678885.1_ASM167888v1_genomic.fna |
| 6095 | <i>Neisseria meningitidis</i>             | GCA_001697685.1_ASM169768v1_genomic.fna |
| 6096 | <i>Helicobacter pylori</i>                | GCA_000392535.3_ASM39253v3_genomic.fna  |
| 6097 | <i>Mycobacterium tuberculosis</i>         | GCA_001922485.1_ASM192248v1_genomic.fna |
| 6098 | <i>Escherichia coli</i>                   | GCA_000257275.1_ASM25727v1_genomic.fna  |
| 6099 | <i>Listeria monocytogenes</i>             | GCA_000681515.1_ASM68151v1_genomic.fna  |
| 6100 | <i>Staphylococcus aureus</i>              | GCA_000737615.1_ASM73761v1_genomic.fna  |
| 6101 | <i>Campylobacter jejuni</i>               | GCA_001506405.1_ASM150640v1_genomic.fna |
| 6102 | <i>Salmonella enterica</i>                | GCA_000430145.3_ASM43014v3_genomic.fna  |
| 6103 | <i>Campylobacter jejuni</i>               | GCA_001506425.1_ASM150642v1_genomic.fna |
| 6104 | <i>Salmonella enterica</i>                | GCA_000430165.1_ASM43016v1_genomic.fna  |
| 6105 | <i>Staphylococcus aureus</i>              | GCA_000746505.1_ASM74650v1_genomic.fna  |
| 6106 | <i>Listeria monocytogenes</i>             | GCA_000746625.1_ASM74662v1_genomic.fna  |
| 6107 | <i>Escherichia coli</i>                   | GCA_000258025.1_ASM25802v1_genomic.fna  |
| 6108 | <i>Mycobacterium tuberculosis</i>         | GCA_001938725.1_ASM193872v1_genomic.fna |
| 6109 | <i>Helicobacter pylori</i>                | GCA_000439295.2_ASM43929v2_genomic.fna  |
| 6110 | <i>Neisseria meningitidis</i>             | GCA_001697705.1_ASM169770v1_genomic.fna |
| 6111 | <i>Streptococcus pyogenes</i>             | GCA_002055535.1_NCTC8198_genomic.fna    |
| 6112 | <i>Pseudomonas aeruginosa</i>             | GCA_001547955.1_ASM154795v1_genomic.fna |
| 6113 | <i>Acinetobacter baumannii</i>            | GCA_001806445.1_ASM180644v1_genomic.fna |
| 6114 | <i>Legionella pneumophila</i>             | GCA_001766315.1_ASM176631v1_genomic.fna |
| 6115 | <i>Chlamydia trachomatis</i>              | GCA_000507225.1_ASM50722v1_genomic.fna  |
| 6116 | <i>Burkholderia pseudomallei</i>          | GCA_001695715.1_ASM169571v1_genomic.fna |
| 6117 | <i>Coxiella burnetii</i>                  | GCA_000359545.5_G255_GS_genomic.fna     |

|      |                                           |                                         |
|------|-------------------------------------------|-----------------------------------------|
| 6118 | <i>Bacillus subtilis</i>                  | GCA_002072735.1_ASM207273v1_genomic.fna |
| 6119 | <i>Klebsiella pneumoniae</i>              | GCA_001521895.1_ASM152189v1_genomic.fna |
| 6120 | <i>Bordetella pertussis</i>               | GCA_001605645.1_ASM160564v1_genomic.fna |
| 6121 | <i>Corynebacterium pseudotuberculosis</i> | GCA_001867105.1_ASM186710v1_genomic.fna |
| 6122 | <i>Enterobacter asburiae</i>              | GCA_001617645.1_ASM161764v1_genomic.fna |
| 6123 | <i>Corynebacterium pseudotuberculosis</i> | GCA_001867125.1_ASM186712v1_genomic.fna |
| 6124 | <i>Bordetella pertussis</i>               | GCA_001605665.1_ASM160566v1_genomic.fna |
| 6125 | <i>Treponema pallidum</i>                 | GCA_000008605.1_ASM860v1_genomic.fna    |
| 6126 | <i>Klebsiella pneumoniae</i>              | GCA_001529935.1_ASM152993v1_genomic.fna |
| 6127 | <i>Bacillus subtilis</i>                  | GCA_002096095.1_ASM209609v1_genomic.fna |
| 6128 | <i>Burkholderia pseudomallei</i>          | GCA_001695735.1_ASM169573v1_genomic.fna |
| 6129 | <i>Chlamydia trachomatis</i>              | GCA_000590575.1_ASM59057v1_genomic.fna  |
| 6130 | <i>Legionella pneumophila</i>             | GCA_001766335.1_ASM176633v1_genomic.fna |
| 6131 | <i>Acinetobacter baumannii</i>            | GCA_001806465.1_ASM180646v1_genomic.fna |
| 6132 | <i>Pseudomonas aeruginosa</i>             | GCA_001548135.1_ASM154813v1_genomic.fna |
| 6133 | <i>Streptococcus pyogenes</i>             | GCA_002163545.1_ASM216354v1_genomic.fna |
| 6134 | <i>Neisseria meningitidis</i>             | GCA_001697725.1_ASM169772v1_genomic.fna |
| 6135 | <i>Helicobacter pylori</i>                | GCA_000498315.1_ASM49831v1_genomic.fna  |
| 6136 | <i>Escherichia coli</i>                   | GCA_000258145.1_ASM25814v1_genomic.fna  |
| 6137 | <i>Mycobacterium tuberculosis</i>         | GCA_002072775.2_ASM207277v2_genomic.fna |
| 6138 | <i>Listeria monocytogenes</i>             | GCA_000800335.1_ASM80033v1_genomic.fna  |
| 6139 | <i>Staphylococcus aureus</i>              | GCA_000756205.1_ASM75620v1_genomic.fna  |
| 6140 | <i>Salmonella enterica</i>                | GCA_000439415.1_ASM43941v1_genomic.fna  |
| 6141 | <i>Campylobacter jejuni</i>               | GCA_001506445.1_ASM150644v1_genomic.fna |
| 6142 | <i>Campylobacter jejuni</i>               | GCA_001506465.1_ASM150646v1_genomic.fna |
| 6143 | <i>Salmonella enterica</i>                | GCA_000442415.1_ASM44241v1_genomic.fna  |
| 6144 | <i>Staphylococcus aureus</i>              | GCA_000769575.1_ASM76957v1_genomic.fna  |
| 6145 | <i>Listeria monocytogenes</i>             | GCA_000808055.1_ASM80805v1_genomic.fna  |
| 6146 | <i>Escherichia coli</i>                   | GCA_000262125.1_ASM26212v1_genomic.fna  |
| 6147 | <i>Mycobacterium tuberculosis</i>         | GCA_002116755.1_ASM211675v1_genomic.fna |
| 6148 | <i>Helicobacter pylori</i>                | GCA_000498335.1_ASM49833v1_genomic.fna  |
| 6149 | <i>Neisseria meningitidis</i>             | GCA_001697745.1_ASM169774v1_genomic.fna |
| 6150 | <i>Streptococcus pyogenes</i>             | GCA_002236855.1_ASM223685v1_genomic.fna |
| 6151 | <i>Pseudomonas aeruginosa</i>             | GCA_001548335.1_ASM154833v1_genomic.fna |

|      |                                           |                                         |
|------|-------------------------------------------|-----------------------------------------|
| 6152 | <i>Acinetobacter baumannii</i>            | GCA_001806485.1_ASM180648v1_genomic.fna |
| 6153 | <i>Legionella pneumophila</i>             | GCA_001766355.1_ASM176635v1_genomic.fna |
| 6154 | <i>Chlamydia trachomatis</i>              | GCA_000590615.1_ASM59061v1_genomic.fna  |
| 6155 | <i>Burkholderia pseudomallei</i>          | GCA_001885195.1_ASM188519v1_genomic.fna |
| 6156 | <i>Bacillus subtilis</i>                  | GCA_002142595.1_ASM214259v1_genomic.fna |
| 6157 | <i>Klebsiella pneumoniae</i>              | GCA_001530015.1_ASM153001v1_genomic.fna |
| 6158 | <i>Bordetella pertussis</i>               | GCA_001605685.1_ASM160568v1_genomic.fna |
| 6159 | <i>Corynebacterium pseudotuberculosis</i> | GCA_001867145.1_ASM186714v1_genomic.fna |
| 6160 | <i>Corynebacterium pseudotuberculosis</i> | GCA_001867165.1_ASM186716v1_genomic.fna |
| 6161 | <i>Bordetella pertussis</i>               | GCA_001628735.1_ASM162873v1_genomic.fna |
| 6162 | <i>Klebsiella pneumoniae</i>              | GCA_001548315.1_ASM154831v1_genomic.fna |
| 6163 | <i>Bacillus subtilis</i>                  | GCA_002163815.1_ASM216381v1_genomic.fna |
| 6164 | <i>Burkholderia pseudomallei</i>          | GCA_001887555.1_ASM188755v1_genomic.fna |
| 6165 | <i>Chlamydia trachomatis</i>              | GCA_000590635.1_ASM59063v1_genomic.fna  |
| 6166 | <i>Legionella pneumophila</i>             | GCA_001766375.1_ASM176637v1_genomic.fna |
| 6167 | <i>Acinetobacter baumannii</i>            | GCA_001887305.1_ASM188730v1_genomic.fna |
| 6168 | <i>Pseudomonas aeruginosa</i>             | GCA_001594325.2_ASM159432v2_genomic.fna |
| 6169 | <i>Streptococcus pyogenes</i>             | GCA_002236875.1_ASM223687v1_genomic.fna |
| 6170 | <i>Neisseria meningitidis</i>             | GCA_001697765.1_ASM169776v1_genomic.fna |
| 6171 | <i>Helicobacter pylori</i>                | GCA_000590775.1_ASM59077v1_genomic.fna  |
| 6172 | <i>Mycobacterium tuberculosis</i>         | GCA_002116775.1_ASM211677v1_genomic.fna |
| 6173 | <i>Escherichia coli</i>                   | GCA_000270105.1_ASM27010v1_genomic.fna  |
| 6174 | <i>Listeria monocytogenes</i>             | GCA_000950775.1_ASM95077v1_genomic.fna  |
| 6175 | <i>Staphylococcus aureus</i>              | GCA_000772025.1_ASM77202v1_genomic.fna  |
| 6176 | <i>Salmonella enterica</i>                | GCA_000462995.1_ASM46299v1_genomic.fna  |
| 6177 | <i>Campylobacter jejuni</i>               | GCA_001506485.1_ASM150648v1_genomic.fna |
| 6178 | <i>Salmonella enterica</i>                | GCA_000473275.1_ASM47327v1_genomic.fna  |
| 6179 | <i>Campylobacter jejuni</i>               | GCA_001506505.1_ASM150650v1_genomic.fna |
| 6180 | <i>Staphylococcus aureus</i>              | GCA_000815045.1_ASM81504v1_genomic.fna  |
| 6181 | <i>Listeria monocytogenes</i>             | GCA_001005925.1_ASM100592v1_genomic.fna |
| 6182 | <i>Mycobacterium tuberculosis</i>         | GCA_002116795.1_ASM211679v1_genomic.fna |
| 6183 | <i>Escherichia coli</i>                   | GCA_000284495.1_ASM28449v1_genomic.fna  |
| 6184 | <i>Helicobacter pylori</i>                | GCA_000600045.1_ASM60004v1_genomic.fna  |
| 6185 | <i>Neisseria meningitidis</i>             | GCA_001697785.1_ASM169778v1_genomic.fna |

|      |                                           |                                         |
|------|-------------------------------------------|-----------------------------------------|
| 6186 | <i>Streptococcus pyogenes</i>             | GCA_002238295.1_ASM223829v1_genomic.fna |
| 6187 | <i>Fusobacterium nucleatum</i>            | GCA_001296125.1_ASM129612v1_genomic.fna |
| 6188 | <i>Pseudomonas aeruginosa</i>             | GCA_001606045.1_ASM160604v1_genomic.fna |
| 6189 | <i>Acinetobacter baumannii</i>            | GCA_001895985.1_ASM189598v1_genomic.fna |
| 6190 | <i>Legionella pneumophila</i>             | GCA_001886795.1_ASM188679v1_genomic.fna |
| 6191 | <i>Chlamydia trachomatis</i>              | GCA_000590675.1_ASM59067v1_genomic.fna  |
| 6192 | <i>Burkholderia pseudomallei</i>          | GCA_001887575.1_ASM188757v1_genomic.fna |
| 6193 | <i>Bacillus subtilis</i>                  | GCA_002173695.1_ASM217369v1_genomic.fna |
| 6194 | <i>Klebsiella pneumoniae</i>              | GCA_001611055.1_ASM161105v1_genomic.fna |
| 6195 | <i>Brucella suis</i>                      | GCA_000755085.1_ASM75508v1_genomic.fna  |
| 6196 | <i>Bordetella pertussis</i>               | GCA_001686365.1_ASM168636v1_genomic.fna |
| 6197 | <i>Corynebacterium pseudotuberculosis</i> | GCA_001889145.1_ASM188914v1_genomic.fna |
| 6198 | <i>Corynebacterium pseudotuberculosis</i> | GCA_001922265.1_ASM192226v1_genomic.fna |
| 6199 | <i>Bordetella pertussis</i>               | GCA_001686405.1_ASM168640v1_genomic.fna |
| 6200 | <i>Brucella suis</i>                      | GCA_000755105.1_ASM75510v1_genomic.fna  |
| 6201 | <i>Klebsiella pneumoniae</i>              | GCA_001611095.1_ASM161109v1_genomic.fna |
| 6202 | <i>Bacillus subtilis</i>                  | GCA_002173715.1_ASM217371v1_genomic.fna |
| 6203 | <i>Burkholderia pseudomallei</i>          | GCA_001975065.1_ASM197506v1_genomic.fna |
| 6204 | <i>Chlamydia trachomatis</i>              | GCA_000590755.1_ASM59075v1_genomic.fna  |
| 6205 | <i>Legionella pneumophila</i>             | GCA_001886835.1_ASM188683v1_genomic.fna |
| 6206 | <i>Acinetobacter baumannii</i>            | GCA_001896005.1_ASM189600v1_genomic.fna |
| 6207 | <i>Pseudomonas aeruginosa</i>             | GCA_001618925.1_ASM161892v1_genomic.fna |
| 6208 | <i>Fusobacterium nucleatum</i>            | GCA_001296185.1_ASM129618v1_genomic.fna |
| 6209 | <i>Streptococcus pyogenes</i>             | GCA_002238315.1_ASM223831v1_genomic.fna |
| 6210 | <i>Neisseria meningitidis</i>             | GCA_001697805.1_ASM169780v1_genomic.fna |
| 6211 | <i>Helicobacter pylori</i>                | GCA_000600085.1_ASM60008v1_genomic.fna  |
| 6212 | <i>Mycobacterium tuberculosis</i>         | GCA_002116815.1_ASM211681v1_genomic.fna |
| 6213 | <i>Escherichia coli</i>                   | GCA_000285655.3_EC958.v1_genomic.fna    |
| 6214 | <i>Listeria monocytogenes</i>             | GCA_001005985.1_ASM100598v1_genomic.fna |
| 6215 | <i>Staphylococcus aureus</i>              | GCA_000815085.1_ASM81508v1_genomic.fna  |
| 6216 | <i>Campylobacter jejuni</i>               | GCA_001506525.1_ASM150652v1_genomic.fna |
| 6217 | <i>Salmonella enterica</i>                | GCA_000483715.2_ASM48371v2_genomic.fna  |
| 6218 | <i>Campylobacter jejuni</i>               | GCA_001506545.1_ASM150654v1_genomic.fna |
| 6219 | <i>Salmonella enterica</i>                | GCA_000484195.2_ASM48419v2_genomic.fna  |

|      |                                           |                                         |
|------|-------------------------------------------|-----------------------------------------|
| 6220 | <i>Staphylococcus aureus</i>              | GCA_000815125.1_ASM81512v1_genomic.fna  |
| 6221 | <i>Listeria monocytogenes</i>             | GCA_001027065.1_ASM102706v1_genomic.fna |
| 6222 | <i>Mycobacterium tuberculosis</i>         | GCA_002116835.1_ASM211683v1_genomic.fna |
| 6223 | <i>Escherichia coli</i>                   | GCA_000299255.1_ASM29925v1_genomic.fna  |
| 6224 | <i>Helicobacter pylori</i>                | GCA_000600125.1_ASM60012v1_genomic.fna  |
| 6225 | <i>Neisseria meningitidis</i>             | GCA_001697825.1_ASM169782v1_genomic.fna |
| 6226 | <i>Streptococcus pyogenes</i>             | GCA_002355175.1_ASM235517v1_genomic.fna |
| 6227 | <i>Fusobacterium nucleatum</i>            | GCA_002211645.1_ASM221164v1_genomic.fna |
| 6228 | <i>Pseudomonas aeruginosa</i>             | GCA_001632245.1_ASM163224v1_genomic.fna |
| 6229 | <i>Acinetobacter baumannii</i>            | GCA_001902375.1_ASM190237v1_genomic.fna |
| 6230 | <i>Legionella pneumophila</i>             | GCA_001941585.1_ASM194158v1_genomic.fna |
| 6231 | <i>Chlamydia trachomatis</i>              | GCA_000971705.1_ASM97170v1_genomic.fna  |
| 6232 | <i>Burkholderia pseudomallei</i>          | GCA_001975085.1_ASM197508v1_genomic.fna |
| 6233 | <i>Bacillus subtilis</i>                  | GCA_002201955.1_ASM220195v1_genomic.fna |
| 6234 | <i>Klebsiella pneumoniae</i>              | GCA_001644765.1_ASM164476v1_genomic.fna |
| 6235 | <i>Chlamydia psittaci</i>                 | GCA_000298375.2_ASM29837v2_genomic.fna  |
| 6236 | <i>Bordetella pertussis</i>               | GCA_001686425.1_ASM168642v1_genomic.fna |
| 6237 | <i>Corynebacterium pseudotuberculosis</i> | GCA_001922285.1_ASM192228v1_genomic.fna |
| 6238 | <i>Corynebacterium pseudotuberculosis</i> | GCA_001969145.2_ASM196914v2_genomic.fna |
| 6239 | <i>Bordetella pertussis</i>               | GCA_001686445.1_ASM168644v1_genomic.fna |
| 6240 | <i>Chlamydia psittaci</i>                 | GCA_000338695.1_ASM33869v1_genomic.fna  |
| 6241 | <i>Klebsiella pneumoniae</i>              | GCA_001646625.1_ASM164662v1_genomic.fna |
| 6242 | <i>Bacillus subtilis</i>                  | GCA_002201995.1_ASM220199v1_genomic.fna |
| 6243 | <i>Burkholderia pseudomallei</i>          | GCA_001975105.1_ASM197510v1_genomic.fna |
| 6244 | <i>Chlamydia trachomatis</i>              | GCA_000971725.1_ASM97172v1_genomic.fna  |
| 6245 | <i>Legionella pneumophila</i>             | GCA_001969405.1_ASM196940v1_genomic.fna |
| 6246 | <i>Acinetobacter baumannii</i>            | GCA_001908295.1_ASM190829v1_genomic.fna |
| 6247 | <i>Pseudomonas aeruginosa</i>             | GCA_001679685.1_ASM167968v1_genomic.fna |
| 6248 | <i>Streptococcus pyogenes</i>             | GCA_002355815.1_ASM235581v1_genomic.fna |
| 6249 | <i>Neisseria meningitidis</i>             | GCA_001697845.1_ASM169784v1_genomic.fna |
| 6250 | <i>Helicobacter pylori</i>                | GCA_000600145.1_ASM60014v1_genomic.fna  |
| 6251 | <i>Escherichia coli</i>                   | GCA_000299475.1_ASM29947v1_genomic.fna  |
| 6252 | <i>Mycobacterium tuberculosis</i>         | GCA_002116855.1_ASM211685v1_genomic.fna |
| 6253 | <i>Listeria monocytogenes</i>             | GCA_001027085.1_ASM102708v1_genomic.fna |



|      |                                           |                                         |
|------|-------------------------------------------|-----------------------------------------|
| 6254 | <i>Staphylococcus aureus</i>              | GCA_000815165.1_ASM81516v1_genomic.fna  |
| 6255 | <i>Campylobacter jejuni</i>               | GCA_001506565.1_ASM150656v1_genomic.fna |
| 6256 | <i>Salmonella enterica</i>                | GCA_000486045.2_ASM48604v2_genomic.fna  |
| 6257 | <i>Salmonella enterica</i>                | GCA_000486165.2_ASM48616v2_genomic.fna  |
| 6258 | <i>Campylobacter jejuni</i>               | GCA_001506585.1_ASM150658v1_genomic.fna |
| 6259 | <i>Staphylococcus aureus</i>              | GCA_000815205.1_ASM81520v1_genomic.fna  |
| 6260 | <i>Listeria monocytogenes</i>             | GCA_001027125.1_ASM102712v1_genomic.fna |
| 6261 | <i>Mycobacterium tuberculosis</i>         | GCA_002208235.1_ASM220823v1_genomic.fna |
| 6262 | <i>Escherichia coli</i>                   | GCA_000332755.1_ASM33275v1_genomic.fna  |
| 6263 | <i>Helicobacter pylori</i>                | GCA_000600165.1_ASM60016v1_genomic.fna  |
| 6264 | <i>Neisseria meningitidis</i>             | GCA_001697865.1_ASM169786v1_genomic.fna |
| 6265 | <i>Streptococcus pyogenes</i>             | GCA_002557755.1_ASM255775v1_genomic.fna |
| 6266 | <i>Pseudomonas aeruginosa</i>             | GCA_001721745.1_ASM172174v1_genomic.fna |
| 6267 | <i>Acinetobacter baumannii</i>            | GCA_001922205.1_ASM192220v1_genomic.fna |
| 6268 | <i>Legionella pneumophila</i>             | GCA_001989475.1_ASM198947v1_genomic.fna |
| 6269 | <i>Chlamydia trachomatis</i>              | GCA_001183765.1_ASM118376v1_genomic.fna |
| 6270 | <i>Burkholderia pseudomallei</i>          | GCA_001975125.1_ASM197512v1_genomic.fna |
| 6271 | <i>Bacillus subtilis</i>                  | GCA_002202035.1_ASM220203v1_genomic.fna |
| 6272 | <i>Klebsiella pneumoniae</i>              | GCA_001648215.1_ASM164821v1_genomic.fna |
| 6273 | <i>Bordetella pertussis</i>               | GCA_001686465.1_ASM168646v1_genomic.fna |
| 6274 | <i>Corynebacterium pseudotuberculosis</i> | GCA_001969165.2_ASM196916v2_genomic.fna |
| 6275 | <i>Corynebacterium pseudotuberculosis</i> | GCA_001975165.1_ASM197516v1_genomic.fna |
| 6276 | <i>Bordetella pertussis</i>               | GCA_001686485.1_ASM168648v1_genomic.fna |
| 6277 | <i>Klebsiella pneumoniae</i>              | GCA_001663195.1_ASM166319v1_genomic.fna |
| 6278 | <i>Bacillus subtilis</i>                  | GCA_002202055.1_ASM220205v1_genomic.fna |
| 6279 | <i>Burkholderia pseudomallei</i>          | GCA_001975145.1_ASM197514v1_genomic.fna |
| 6280 | <i>Chlamydia trachomatis</i>              | GCA_001183805.1_ASM118380v1_genomic.fna |
| 6281 | <i>Legionella pneumophila</i>             | GCA_900092465.1_Lpm7613_v1_genomic.fna  |
| 6282 | <i>Acinetobacter baumannii</i>            | GCA_001922225.1_ASM192222v1_genomic.fna |
| 6283 | <i>Pseudomonas aeruginosa</i>             | GCA_001721765.1_ASM172176v1_genomic.fna |
| 6284 | <i>Neisseria meningitidis</i>             | GCA_001697885.1_ASM169788v1_genomic.fna |
| 6285 | <i>Helicobacter pylori</i>                | GCA_000600185.1_ASM60018v1_genomic.fna  |
| 6286 | <i>Escherichia coli</i>                   | GCA_000350185.1_ASM35018v1_genomic.fna  |
| 6287 | <i>Mycobacterium tuberculosis</i>         | GCA_002356015.1_ASM235601v1_genomic.fna |

|      |                                           |                                             |
|------|-------------------------------------------|---------------------------------------------|
| 6288 | <i>Listeria monocytogenes</i>             | GCA_001027165.1_ASM102716v1_genomic.fna     |
| 6289 | <i>Staphylococcus aureus</i>              | GCA_000815245.1_ASM81524v1_genomic.fna      |
| 6290 | <i>Campylobacter jejuni</i>               | GCA_001506605.1_ASM150660v1_genomic.fna     |
| 6291 | <i>Salmonella enterica</i>                | GCA_000486345.2_ASM48634v2_genomic.fna      |
| 6292 | <i>Campylobacter jejuni</i>               | GCA_001506625.1_ASM150662v1_genomic.fna     |
| 6293 | <i>Salmonella enterica</i>                | GCA_000486365.2_ASM48636v2_genomic.fna      |
| 6294 | <i>Staphylococcus aureus</i>              | GCA_000828035.1_ASM82803v1_genomic.fna      |
| 6295 | <i>Listeria monocytogenes</i>             | GCA_001027205.1_ASM102720v1_genomic.fna     |
| 6296 | <i>Mycobacterium tuberculosis</i>         | GCA_002356255.1_ASM235625v1_genomic.fna     |
| 6297 | <i>Helicobacter pylori</i>                | GCA_000600205.1_ASM60020v1_genomic.fna      |
| 6298 | <i>Escherichia coli</i>                   | GCA_000464955.2_ASM46495v2_genomic.fna      |
| 6299 | <i>Neisseria meningitidis</i>             | GCA_001697905.1_ASM169790v1_genomic.fna     |
| 6300 | <i>Pseudomonas aeruginosa</i>             | GCA_001721785.1_ASM172178v1_genomic.fna     |
| 6301 | <i>Acinetobacter baumannii</i>            | GCA_001922245.1_ASM192224v1_genomic.fna     |
| 6302 | <i>Legionella pneumophila</i>             | GCA_900119755.1_2531STDY5467379_genomic.fna |
| 6303 | <i>Chlamydia trachomatis</i>              | GCA_001183825.1_ASM118382v1_genomic.fna     |
| 6304 | <i>Burkholderia pseudomallei</i>          | GCA_002110945.1_ASM211094v1_genomic.fna     |
| 6305 | <i>Bacillus subtilis</i>                  | GCA_002216085.1_ASM221608v1_genomic.fna     |
| 6306 | <i>Klebsiella pneumoniae</i>              | GCA_001663295.1_ASM166329v1_genomic.fna     |
| 6307 | <i>Bordetella pertussis</i>               | GCA_001686505.1_ASM168650v1_genomic.fna     |
| 6308 | <i>Corynebacterium pseudotuberculosis</i> | GCA_001989595.1_ASM198959v1_genomic.fna     |
| 6309 | <i>Corynebacterium pseudotuberculosis</i> | GCA_002009385.1_ASM200938v1_genomic.fna     |
| 6310 | <i>Bordetella pertussis</i>               | GCA_001686525.1_ASM168652v1_genomic.fna     |
| 6311 | <i>Klebsiella pneumoniae</i>              | GCA_001663435.1_ASM166343v1_genomic.fna     |
| 6312 | <i>Bacillus subtilis</i>                  | GCA_002269175.1_ASM226917v1_genomic.fna     |
| 6313 | <i>Burkholderia pseudomallei</i>          | GCA_002110965.1_ASM211096v1_genomic.fna     |
| 6314 | <i>Chlamydia trachomatis</i>              | GCA_001183845.1_ASM118384v1_genomic.fna     |
| 6315 | <i>Legionella pneumophila</i>             | GCA_900119765.1_2532STDY5467631_genomic.fna |
| 6316 | <i>Acinetobacter baumannii</i>            | GCA_001941765.1_ASM194176v1_genomic.fna     |
| 6317 | <i>Pseudomonas aeruginosa</i>             | GCA_001721805.1_ASM172180v1_genomic.fna     |
| 6318 | <i>Neisseria meningitidis</i>             | GCA_001697925.1_ASM169792v1_genomic.fna     |
| 6319 | <i>Helicobacter pylori</i>                | GCA_000600225.1_ASM60022v1_genomic.fna      |
| 6320 | <i>Mycobacterium tuberculosis</i>         | GCA_002357935.1_ASM235793v1_genomic.fna     |
| 6321 | <i>Escherichia coli</i>                   | GCA_000468515.1_ASM46851v1_genomic.fna      |

|      |                                           |                                                               |
|------|-------------------------------------------|---------------------------------------------------------------|
| 6322 | <i>Listeria monocytogenes</i>             | GCA_001027245.1_ASM102724v1_genomic.fna                       |
| 6323 | <i>Staphylococcus aureus</i>              | GCA_000953255.1_Staphylococcus_aureus_Sa_ILRI_217_genomic.fna |
| 6324 | <i>Salmonella enterica</i>                | GCA_000486405.2_ASM48640v2_genomic.fna                        |
| 6325 | <i>Campylobacter jejuni</i>               | GCA_001506645.1_ASM150664v1_genomic.fna                       |
| 6326 | <i>Campylobacter jejuni</i>               | GCA_001506665.1_ASM150666v1_genomic.fna                       |
| 6327 | <i>Salmonella enterica</i>                | GCA_000486445.2_ASM48644v2_genomic.fna                        |
| 6328 | <i>Staphylococcus aureus</i>              | GCA_000967325.1_ASM96732v1_genomic.fna                        |
| 6329 | <i>Listeria monocytogenes</i>             | GCA_001047715.1_ASM104771v1_genomic.fna                       |
| 6330 | <i>Mycobacterium tuberculosis</i>         | GCA_002357955.1_ASM235795v1_genomic.fna                       |
| 6331 | synthetic <i>Escherichia</i>              | GCA_000474035.1_ASM47403v1_genomic.fna                        |
| 6332 | <i>Helicobacter pylori</i>                | GCA_000685625.1_ASM68562v1_genomic.fna                        |
| 6333 | <i>Neisseria meningitidis</i>             | GCA_001697945.1_ASM169794v1_genomic.fna                       |
| 6334 | <i>Pseudomonas aeruginosa</i>             | GCA_001721825.1_ASM172182v1_genomic.fna                       |
| 6335 | <i>Acinetobacter baumannii</i>            | GCA_002082625.1_ASM208262v1_genomic.fna                       |
| 6336 | <i>Legionella pneumophila</i>             | GCA_900119775.1_2531STDY5467446_genomic.fna                   |
| 6337 | <i>Chlamydia trachomatis</i>              | GCA_001655335.1_ASM165533v1_genomic.fna                       |
| 6338 | <i>Burkholderia pseudomallei</i>          | GCA_002111005.1_ASM211100v1_genomic.fna                       |
| 6339 | <i>Bacillus subtilis</i>                  | GCA_002269195.1_ASM226919v1_genomic.fna                       |
| 6340 | <i>Klebsiella pneumoniae</i>              | GCA_001663455.1_ASM166345v1_genomic.fna                       |
| 6341 | <i>Bordetella pertussis</i>               | GCA_001686545.1_ASM168654v1_genomic.fna                       |
| 6342 | <i>Corynebacterium pseudotuberculosis</i> | GCA_002009415.1_ASM200941v1_genomic.fna                       |
| 6343 | <i>Corynebacterium pseudotuberculosis</i> | GCA_002072715.1_ASM207271v1_genomic.fna                       |
| 6344 | <i>Flavobacterium psychrophilum</i>       | GCA_001431805.1_ASM143180v1_genomic.fna                       |
| 6345 | <i>Bordetella pertussis</i>               | GCA_001686565.1_ASM168656v1_genomic.fna                       |
| 6346 | <i>Klebsiella pneumoniae</i>              | GCA_001675125.1_ASM167512v1_genomic.fna                       |
| 6347 | <i>Bacillus subtilis</i>                  | GCA_002290305.1_ASM229030v1_genomic.fna                       |
| 6348 | <i>Burkholderia pseudomallei</i>          | GCA_002111025.1_ASM211102v1_genomic.fna                       |
| 6349 | <i>Chlamydia trachomatis</i>              | GCA_001655375.1_ASM165537v1_genomic.fna                       |
| 6350 | <i>Legionella pneumophila</i>             | GCA_900119785.1_2531STDY5467415_genomic.fna                   |
| 6351 | <i>Acinetobacter baumannii</i>            | GCA_002082645.1_ASM208264v1_genomic.fna                       |
| 6352 | <i>Pseudomonas aeruginosa</i>             | GCA_001721845.1_ASM172184v1_genomic.fna                       |
| 6353 | <i>Neisseria meningitidis</i>             | GCA_001697965.1_ASM169796v1_genomic.fna                       |
| 6354 | <i>Helicobacter pylori</i>                | GCA_000685665.1_ASM68566v1_genomic.fna                        |
| 6355 | <i>Mycobacterium tuberculosis</i>         | GCA_002357975.1_ASM235797v1_genomic.fna                       |

|      |                                           |                                         |
|------|-------------------------------------------|-----------------------------------------|
| 6356 | <i>Escherichia coli</i>                   | GCA_000493755.1_ASM49375v1_genomic.fna  |
| 6357 | <i>Listeria monocytogenes</i>             | GCA_001188655.1_ASM118865v1_genomic.fna |
| 6358 | <i>Staphylococcus aureus</i>              | GCA_000967345.1_ASM96734v1_genomic.fna  |
| 6359 | <i>Campylobacter jejuni</i>               | GCA_001506685.1_ASM150668v1_genomic.fna |
| 6360 | <i>Salmonella enterica</i>                | GCA_000486585.2_ASM48658v2_genomic.fna  |
| 6361 | <i>Salmonella enterica</i>                | GCA_000486725.2_ASM48672v2_genomic.fna  |
| 6362 | <i>Campylobacter jejuni</i>               | GCA_001506705.1_ASM150670v1_genomic.fna |
| 6363 | <i>Staphylococcus aureus</i>              | GCA_000967365.1_ASM96736v1_genomic.fna  |
| 6364 | <i>Listeria monocytogenes</i>             | GCA_001454845.1_ASM145484v1_genomic.fna |
| 6365 | <i>Escherichia coli</i>                   | GCA_000499485.1_MYMC4100_genomic.fna    |
| 6366 | <i>Mycobacterium tuberculosis</i>         | GCA_002446875.1_ASM244687v1_genomic.fna |
| 6367 | <i>Helicobacter pylori</i>                | GCA_000685705.1_ASM68570v1_genomic.fna  |
| 6368 | <i>Neisseria meningitidis</i>             | GCA_001697985.1_ASM169798v1_genomic.fna |
| 6369 | <i>Pseudomonas aeruginosa</i>             | GCA_001722005.2_ASM172200v2_genomic.fna |
| 6370 | <i>Acinetobacter baumannii</i>            | GCA_002082685.1_ASM208268v1_genomic.fna |
| 6371 | <i>Legionella pneumophila</i>             | GCA_900186855.1_48290_H02_genomic.fna   |
| 6372 | <i>Chlamydia trachomatis</i>              | GCA_001655415.1_ASM165541v1_genomic.fna |
| 6373 | <i>Burkholderia pseudomallei</i>          | GCA_002111045.1_ASM211104v1_genomic.fna |
| 6374 | <i>Bacillus subtilis</i>                  | GCA_002556525.1_ASM255652v1_genomic.fna |
| 6375 | <i>Klebsiella pneumoniae</i>              | GCA_001676825.1_ASM167682v1_genomic.fna |
| 6376 | <i>Bordetella pertussis</i>               | GCA_001686585.1_ASM168658v1_genomic.fna |
| 6377 | <i>Flavobacterium psychrophilum</i>       | GCA_001708385.1_ASM170838v1_genomic.fna |
| 6378 | <i>Corynebacterium pseudotuberculosis</i> | GCA_002155265.1_ASM215526v1_genomic.fna |
| 6379 | <i>Bordetella pertussis</i>               | GCA_001686605.1_ASM168660v1_genomic.fna |
| 6380 | <i>Klebsiella pneumoniae</i>              | GCA_001704235.1_ASM170423v1_genomic.fna |
| 6381 | <i>Burkholderia pseudomallei</i>          | GCA_002111085.1_ASM211108v1_genomic.fna |
| 6382 | <i>Chlamydia trachomatis</i>              | GCA_001655455.1_ASM165545v1_genomic.fna |
| 6383 | <i>Legionella pneumophila</i>             | GCA_900186925.1_48450_B02_genomic.fna   |
| 6384 | <i>Acinetobacter baumannii</i>            | GCA_002082705.1_ASM208270v1_genomic.fna |
| 6385 | <i>Pseudomonas aeruginosa</i>             | GCA_001722025.1_ASM172202v1_genomic.fna |
| 6386 | <i>Neisseria meningitidis</i>             | GCA_001698005.1_ASM169800v1_genomic.fna |
| 6387 | <i>Helicobacter pylori</i>                | GCA_000685745.1_ASM68574v1_genomic.fna  |
| 6388 | <i>Mycobacterium tuberculosis</i>         | GCA_002446895.1_ASM244689v1_genomic.fna |
| 6389 | <i>Escherichia coli</i>                   | GCA_000520035.1_ASM52003v1_genomic.fna  |

|      |                                   |                                         |
|------|-----------------------------------|-----------------------------------------|
| 6390 | <i>Listeria monocytogenes</i>     | GCA_001454865.1_ASM145486v1_genomic.fna |
| 6391 | <i>Staphylococcus aureus</i>      | GCA_000967385.1_ASM96738v1_genomic.fna  |
| 6392 | <i>Campylobacter jejuni</i>       | GCA_001506725.1_ASM150672v1_genomic.fna |
| 6393 | <i>Salmonella enterica</i>        | GCA_000486765.2_ASM48676v2_genomic.fna  |
| 6394 | <i>Campylobacter jejuni</i>       | GCA_001506745.1_ASM150674v1_genomic.fna |
| 6395 | <i>Salmonella enterica</i>        | GCA_000486855.2_ASM48685v2_genomic.fna  |
| 6396 | <i>Staphylococcus aureus</i>      | GCA_000967405.1_ASM96740v1_genomic.fna  |
| 6397 | <i>Listeria monocytogenes</i>     | GCA_001454885.1_ASM145488v1_genomic.fna |
| 6398 | <i>Escherichia coli</i>           | GCA_000520055.1_ASM52005v1_genomic.fna  |
| 6399 | <i>Mycobacterium tuberculosis</i> | GCA_002446915.1_ASM244691v1_genomic.fna |
| 6400 | <i>Helicobacter pylori</i>        | GCA_000817025.1_ASM81702v1_genomic.fna  |
| 6401 | <i>Neisseria meningitidis</i>     | GCA_001698025.1_ASM169802v1_genomic.fna |
| 6402 | <i>Pseudomonas aeruginosa</i>     | GCA_001722045.1_ASM172204v1_genomic.fna |
| 6403 | <i>Acinetobacter baumannii</i>    | GCA_002082725.1_ASM208272v1_genomic.fna |
| 6404 | <i>Chlamydia trachomatis</i>      | GCA_001655495.1_ASM165549v1_genomic.fna |
| 6405 | <i>Burkholderia pseudomallei</i>  | GCA_002111105.1_ASM211110v1_genomic.fna |
| 6406 | <i>Klebsiella pneumoniae</i>      | GCA_001705385.1_ASM170538v1_genomic.fna |
| 6407 | <i>Bordetella bronchiseptica</i>  | GCA_001559055.1_ASM155905v1_genomic.fna |
| 6408 | <i>Bordetella pertussis</i>       | GCA_001686625.1_ASM168662v1_genomic.fna |
| 6409 | <i>Bordetella pertussis</i>       | GCA_001687385.1_ASM168738v1_genomic.fna |
| 6410 | <i>Klebsiella pneumoniae</i>      | GCA_001708225.1_ASM170822v1_genomic.fna |
| 6411 | <i>Burkholderia pseudomallei</i>  | GCA_002111125.1_ASM211112v1_genomic.fna |
| 6412 | <i>Chlamydia trachomatis</i>      | GCA_001655535.1_ASM165553v1_genomic.fna |
| 6413 | <i>Acinetobacter baumannii</i>    | GCA_002082745.1_ASM208274v1_genomic.fna |
| 6414 | <i>Pseudomonas aeruginosa</i>     | GCA_001729505.1_ASM172950v1_genomic.fna |
| 6415 | <i>Neisseria meningitidis</i>     | GCA_001698045.1_ASM169804v1_genomic.fna |
| 6416 | <i>Helicobacter pylori</i>        | GCA_000826985.1_ASM82698v1_genomic.fna  |
| 6417 | <i>Mycobacterium tuberculosis</i> | GCA_002446935.1_ASM244693v1_genomic.fna |
| 6418 | <i>Escherichia coli</i>           | GCA_000597845.1_ASM59784v1_genomic.fna  |
| 6419 | <i>Listeria monocytogenes</i>     | GCA_001454905.1_ASM145490v1_genomic.fna |
| 6420 | <i>Staphylococcus aureus</i>      | GCA_000969225.1_ASM96922v1_genomic.fna  |
| 6421 | <i>Salmonella enterica</i>        | GCA_000486915.2_ASM48691v2_genomic.fna  |
| 6422 | <i>Campylobacter jejuni</i>       | GCA_001506765.1_ASM150676v1_genomic.fna |
| 6423 | <i>Campylobacter jejuni</i>       | GCA_001506785.1_ASM150678v1_genomic.fna |

|      |                                   |                                         |
|------|-----------------------------------|-----------------------------------------|
| 6424 | <i>Salmonella enterica</i>        | GCA_000487035.2_ASM48703v2_genomic.fna  |
| 6425 | <i>Staphylococcus aureus</i>      | GCA_001021875.1_ASM102187v1_genomic.fna |
| 6426 | <i>Listeria monocytogenes</i>     | GCA_001454925.1_ASM145492v1_genomic.fna |
| 6427 | <i>Escherichia coli</i>           | GCA_000599625.1_ASM59962v1_genomic.fna  |
| 6428 | <i>Mycobacterium tuberculosis</i> | GCA_002446955.1_ASM244695v1_genomic.fna |
| 6429 | <i>Helicobacter pylori</i>        | GCA_000827025.1_ASM82702v1_genomic.fna  |
| 6430 | <i>Neisseria meningitidis</i>     | GCA_001698065.1_ASM169806v1_genomic.fna |
| 6431 | <i>Pseudomonas aeruginosa</i>     | GCA_001750705.1_ASM175070v1_genomic.fna |
| 6432 | <i>Acinetobacter baumannii</i>    | GCA_002082785.1_ASM208278v1_genomic.fna |
| 6433 | <i>Chlamydia trachomatis</i>      | GCA_001655575.1_ASM165557v1_genomic.fna |
| 6434 | <i>Burkholderia pseudomallei</i>  | GCA_002111145.1_ASM211114v1_genomic.fna |
| 6435 | <i>Klebsiella pneumoniae</i>      | GCA_001708245.1_ASM170824v1_genomic.fna |
| 6436 | <i>Bordetella pertussis</i>       | GCA_001687405.1_ASM168740v1_genomic.fna |
| 6437 | <i>Bordetella pertussis</i>       | GCA_001831395.1_ASM183139v1_genomic.fna |
| 6438 | <i>Klebsiella pneumoniae</i>      | GCA_001709275.1_ASM170927v1_genomic.fna |
| 6439 | <i>Burkholderia pseudomallei</i>  | GCA_002111165.1_ASM211116v1_genomic.fna |
| 6440 | <i>Chlamydia trachomatis</i>      | GCA_001885175.1_ASM188517v1_genomic.fna |
| 6441 | <i>Acinetobacter baumannii</i>    | GCA_002082805.1_ASM208280v1_genomic.fna |
| 6442 | <i>Pseudomonas aeruginosa</i>     | GCA_001792835.1_ASM179283v1_genomic.fna |
| 6443 | <i>Neisseria meningitidis</i>     | GCA_001698085.1_ASM169808v1_genomic.fna |
| 6444 | <i>Helicobacter pylori</i>        | GCA_000828955.1_ASM82895v1_genomic.fna  |
| 6445 | <i>Mycobacterium tuberculosis</i> | GCA_002446975.1_ASM244697v1_genomic.fna |
| 6446 | <i>Escherichia coli</i>           | GCA_000599645.1_ASM59964v1_genomic.fna  |
| 6447 | <i>Listeria monocytogenes</i>     | GCA_001483405.1_ASM148340v1_genomic.fna |
| 6448 | <i>Staphylococcus aureus</i>      | GCA_001021895.1_ASM102189v1_genomic.fna |
| 6449 | <i>Salmonella enterica</i>        | GCA_000487155.2_ASM48715v2_genomic.fna  |
| 6450 | <i>Campylobacter jejuni</i>       | GCA_001506805.1_ASM150680v1_genomic.fna |
| 6451 | <i>Campylobacter jejuni</i>       | GCA_001506825.1_ASM150682v1_genomic.fna |
| 6452 | <i>Salmonella enterica</i>        | GCA_000487255.2_ASM48725v2_genomic.fna  |
| 6453 | <i>Staphylococcus aureus</i>      | GCA_001027045.1_ASM102704v1_genomic.fna |
| 6454 | <i>Listeria monocytogenes</i>     | GCA_001483425.1_ASM148342v1_genomic.fna |
| 6455 | <i>Escherichia coli</i>           | GCA_000599665.1_ASM59966v1_genomic.fna  |
| 6456 | <i>Mycobacterium tuberculosis</i> | GCA_002446995.1_ASM244699v1_genomic.fna |
| 6457 | <i>Helicobacter pylori</i>        | GCA_000829095.1_ASM82909v1_genomic.fna  |

|      |                                   |                                         |
|------|-----------------------------------|-----------------------------------------|
| 6458 | <i>Neisseria meningitidis</i>     | GCA_001698105.1_ASM169810v1_genomic.fna |
| 6459 | <i>Pseudomonas aeruginosa</i>     | GCA_001792855.1_ASM179285v1_genomic.fna |
| 6460 | <i>Acinetobacter baumannii</i>    | GCA_002082825.1_ASM208282v1_genomic.fna |
| 6461 | <i>Chlamydia trachomatis</i>      | GCA_002088315.1_ASM208831v1_genomic.fna |
| 6462 | <i>Burkholderia pseudomallei</i>  | GCA_002111205.1_ASM211120v1_genomic.fna |
| 6463 | <i>Klebsiella pneumoniae</i>      | GCA_001709295.1_ASM170929v1_genomic.fna |
| 6464 | <i>Bordetella pertussis</i>       | GCA_001831415.1_ASM183141v1_genomic.fna |
| 6465 | <i>Bordetella pertussis</i>       | GCA_001831435.1_ASM183143v1_genomic.fna |
| 6466 | <i>Klebsiella pneumoniae</i>      | GCA_001721725.1_ASM172172v1_genomic.fna |
| 6467 | <i>Burkholderia pseudomallei</i>  | GCA_002111245.1_ASM211124v1_genomic.fna |
| 6468 | <i>Chlamydia trachomatis</i>      | GCA_002088335.1_ASM208833v1_genomic.fna |
| 6469 | <i>Acinetobacter baumannii</i>    | GCA_002082845.1_ASM208284v1_genomic.fna |
| 6470 | <i>Pseudomonas aeruginosa</i>     | GCA_001792875.1_ASM179287v1_genomic.fna |
| 6471 | <i>Neisseria meningitidis</i>     | GCA_001750825.1_ASM175082v1_genomic.fna |
| 6472 | <i>Helicobacter pylori</i>        | GCA_000829115.1_ASM82911v1_genomic.fna  |
| 6473 | <i>Mycobacterium tuberculosis</i> | GCA_002447015.1_ASM244701v1_genomic.fna |
| 6474 | <i>Escherichia coli</i>           | GCA_000599685.1_ASM59968v1_genomic.fna  |
| 6475 | <i>Listeria monocytogenes</i>     | GCA_001483445.1_ASM148344v1_genomic.fna |
| 6476 | <i>Staphylococcus aureus</i>      | GCA_001027105.1_ASM102710v1_genomic.fna |
| 6477 | <i>Campylobacter jejuni</i>       | GCA_001506845.1_ASM150684v1_genomic.fna |
| 6478 | <i>Salmonella enterica</i>        | GCA_000487295.2_ASM48729v2_genomic.fna  |
| 6479 | <i>Campylobacter jejuni</i>       | GCA_001506865.1_ASM150686v1_genomic.fna |
| 6480 | <i>Salmonella enterica</i>        | GCA_000487515.2_ASM48751v2_genomic.fna  |
| 6481 | <i>Staphylococcus aureus</i>      | GCA_001045795.2_ASM104579v2_genomic.fna |
| 6482 | <i>Listeria monocytogenes</i>     | GCA_001513695.1_ASM151369v1_genomic.fna |
| 6483 | <i>Escherichia coli</i>           | GCA_000599705.1_ASM59970v1_genomic.fna  |
| 6484 | <i>Mycobacterium tuberculosis</i> | GCA_002447035.1_ASM244703v1_genomic.fna |
| 6485 | <i>Helicobacter pylori</i>        | GCA_000829135.1_ASM82913v1_genomic.fna  |
| 6486 | <i>Neisseria meningitidis</i>     | GCA_001974965.1_ASM197496v1_genomic.fna |
| 6487 | <i>Pseudomonas aeruginosa</i>     | GCA_001870265.1_ASM187026v1_genomic.fna |
| 6488 | <i>Acinetobacter baumannii</i>    | GCA_002082865.1_ASM208286v1_genomic.fna |
| 6489 | <i>Chlamydia trachomatis</i>      | GCA_002088355.1_ASM208835v1_genomic.fna |
| 6490 | <i>Burkholderia pseudomallei</i>  | GCA_002111265.1_ASM211126v1_genomic.fna |
| 6491 | <i>Klebsiella pneumoniae</i>      | GCA_001741545.1_ASM174154v1_genomic.fna |

|      |                                   |                                         |
|------|-----------------------------------|-----------------------------------------|
| 6492 | <i>Bordetella pertussis</i>       | GCA_001831455.1_ASM183145v1_genomic.fna |
| 6493 | <i>Bordetella pertussis</i>       | GCA_001984925.1_ASM198492v1_genomic.fna |
| 6494 | <i>Klebsiella pneumoniae</i>      | GCA_001741665.1_ASM174166v1_genomic.fna |
| 6495 | <i>Burkholderia pseudomallei</i>  | GCA_002111305.1_ASM211130v1_genomic.fna |
| 6496 | <i>Acinetobacter baumannii</i>    | GCA_002082885.1_ASM208288v1_genomic.fna |
| 6497 | <i>Pseudomonas aeruginosa</i>     | GCA_001874465.1_ASM187446v1_genomic.fna |
| 6498 | <i>Neisseria meningitidis</i>     | GCA_002073235.1_ASM207323v1_genomic.fna |
| 6499 | <i>Helicobacter pylori</i>        | GCA_000982695.1_ASM98269v1_genomic.fna  |
| 6500 | <i>Mycobacterium tuberculosis</i> | GCA_002447055.1_ASM244705v1_genomic.fna |
| 6501 | <i>Escherichia coli</i>           | GCA_000662395.1_ASM66239v1_genomic.fna  |
| 6502 | <i>Listeria monocytogenes</i>     | GCA_001548585.1_ASM154858v1_genomic.fna |
| 6503 | <i>Staphylococcus aureus</i>      | GCA_001045995.2_ASM104599v2_genomic.fna |
| 6504 | <i>Campylobacter jejuni</i>       | GCA_001506885.1_ASM150688v1_genomic.fna |
| 6505 | <i>Salmonella enterica</i>        | GCA_000487575.2_ASM48757v2_genomic.fna  |
| 6506 | <i>Salmonella enterica</i>        | GCA_000487615.2_ASM48761v2_genomic.fna  |
| 6507 | <i>Campylobacter jejuni</i>       | GCA_001506905.1_ASM150690v1_genomic.fna |
| 6508 | <i>Staphylococcus aureus</i>      | GCA_001046095.2_ASM104609v2_genomic.fna |
| 6509 | <i>Listeria monocytogenes</i>     | GCA_001548635.1_ASM154863v1_genomic.fna |
| 6510 | <i>Escherichia coli</i>           | GCA_000671295.1_ASM67129v1_genomic.fna  |
| 6511 | <i>Mycobacterium tuberculosis</i> | GCA_002447075.1_ASM244707v1_genomic.fna |
| 6512 | <i>Helicobacter pylori</i>        | GCA_001433495.1_ASM143349v1_genomic.fna |
| 6513 | <i>Neisseria meningitidis</i>     | GCA_002073275.1_ASM207327v1_genomic.fna |
| 6514 | <i>Pseudomonas aeruginosa</i>     | GCA_001879525.1_ASM187952v1_genomic.fna |
| 6515 | <i>Acinetobacter baumannii</i>    | GCA_002116925.1_ASM211692v1_genomic.fna |
| 6516 | <i>Burkholderia pseudomallei</i>  | GCA_002111325.1_ASM211132v1_genomic.fna |
| 6517 | <i>Ralstonia solanacearum</i>     | GCA_001267515.1_ASM126751v1_genomic.fna |
| 6518 | <i>Klebsiella pneumoniae</i>      | GCA_001746535.1_ASM174653v1_genomic.fna |
| 6519 | <i>Bordetella pertussis</i>       | GCA_001984945.1_ASM198494v1_genomic.fna |
| 6520 | <i>Bordetella pertussis</i>       | GCA_001984965.1_ASM198496v1_genomic.fna |
| 6521 | <i>Klebsiella pneumoniae</i>      | GCA_001750805.1_ASM175080v1_genomic.fna |
| 6522 | <i>Burkholderia pseudomallei</i>  | GCA_002111345.1_ASM211134v1_genomic.fna |
| 6523 | <i>Acinetobacter baumannii</i>    | GCA_002210065.1_ASM221006v1_genomic.fna |
| 6524 | <i>Pseudomonas aeruginosa</i>     | GCA_001900195.1_ASM190019v1_genomic.fna |
| 6525 | <i>Neisseria meningitidis</i>     | GCA_002073555.1_ASM207355v1_genomic.fna |



|      |                                   |                                         |
|------|-----------------------------------|-----------------------------------------|
| 6526 | <i>Helicobacter pylori</i>        | GCA_001433515.1_ASM143351v1_genomic.fna |
| 6527 | <i>Mycobacterium tuberculosis</i> | GCA_002447095.1_ASM244709v1_genomic.fna |
| 6528 | <i>Escherichia coli</i>           | GCA_000714595.1_ASM71459v1_genomic.fna  |
| 6529 | <i>Listeria monocytogenes</i>     | GCA_001551855.1_ASM155185v1_genomic.fna |
| 6530 | <i>Staphylococcus aureus</i>      | GCA_001183705.1_ASM118370v1_genomic.fna |
| 6531 | <i>Campylobacter jejuni</i>       | GCA_001506925.1_ASM150692v1_genomic.fna |
| 6532 | <i>Salmonella enterica</i>        | GCA_000487775.2_ASM48777v2_genomic.fna  |
| 6533 | <i>Campylobacter jejuni</i>       | GCA_001506945.1_ASM150694v1_genomic.fna |
| 6534 | <i>Salmonella enterica</i>        | GCA_000487915.2_ASM48791v2_genomic.fna  |
| 6535 | <i>Staphylococcus aureus</i>      | GCA_001183725.1_ASM118372v1_genomic.fna |
| 6536 | <i>Listeria monocytogenes</i>     | GCA_001596775.2_ASM159677v2_genomic.fna |
| 6537 | <i>Escherichia coli</i>           | GCA_000725265.1_ASM72526v1_genomic.fna  |
| 6538 | <i>Mycobacterium tuberculosis</i> | GCA_002447115.1_ASM244711v1_genomic.fna |
| 6539 | <i>Helicobacter pylori</i>        | GCA_001549715.1_ASM154971v1_genomic.fna |
| 6540 | <i>Neisseria meningitidis</i>     | GCA_002073575.1_ASM207357v1_genomic.fna |
| 6541 | <i>Pseudomonas aeruginosa</i>     | GCA_001900225.1_ASM190022v1_genomic.fna |
| 6542 | <i>Acinetobacter baumannii</i>    | GCA_002504145.1_ASM250414v1_genomic.fna |
| 6543 | <i>Burkholderia pseudomallei</i>  | GCA_002111365.1_ASM211136v1_genomic.fna |
| 6544 | <i>Klebsiella pneumoniae</i>      | GCA_001855315.1_ASM185531v1_genomic.fna |
| 6545 | <i>Bordetella pertussis</i>       | GCA_001984985.1_ASM198498v1_genomic.fna |
| 6546 | <i>Bordetella pertussis</i>       | GCA_001985005.1_ASM198500v1_genomic.fna |
| 6547 | <i>Klebsiella pneumoniae</i>      | GCA_001870165.1_ASM187016v1_genomic.fna |
| 6548 | <i>Burkholderia pseudomallei</i>  | GCA_002111385.1_ASM211138v1_genomic.fna |
| 6549 | <i>Acinetobacter baumannii</i>    | GCA_900088705.1_26872B01_genomic.fna    |
| 6550 | <i>Pseudomonas aeruginosa</i>     | GCA_001900265.1_ASM190026v1_genomic.fna |
| 6551 | <i>Neisseria meningitidis</i>     | GCA_002073595.1_ASM207359v1_genomic.fna |
| 6552 | <i>Helicobacter pylori</i>        | GCA_001653375.1_ASM165337v1_genomic.fna |
| 6553 | <i>Mycobacterium tuberculosis</i> | GCA_002447135.1_ASM244713v1_genomic.fna |
| 6554 | <i>Escherichia coli</i>           | GCA_000725305.1_ASM72530v1_genomic.fna  |
| 6555 | <i>Listeria monocytogenes</i>     | GCA_001644625.1_ASM164462v1_genomic.fna |
| 6556 | <i>Staphylococcus aureus</i>      | GCA_001278745.1_ASM127874v1_genomic.fna |
| 6557 | <i>Campylobacter jejuni</i>       | GCA_001506965.1_ASM150696v1_genomic.fna |
| 6558 | <i>Salmonella enterica</i>        | GCA_000487935.2_ASM48793v2_genomic.fna  |
| 6559 | <i>Salmonella enterica</i>        | GCA_000493535.2_DT2_genomic.fna         |

|      |                                   |                                         |
|------|-----------------------------------|-----------------------------------------|
| 6560 | <i>Campylobacter jejuni</i>       | GCA_001506985.1_ASM150698v1_genomic.fna |
| 6561 | <i>Staphylococcus aureus</i>      | GCA_001281145.1_ASM128114v1_genomic.fna |
| 6562 | <i>Listeria monocytogenes</i>     | GCA_001908335.1_ASM190833v1_genomic.fna |
| 6563 | <i>Escherichia coli</i>           | GCA_000730345.1_ASM73034v1_genomic.fna  |
| 6564 | <i>Mycobacterium tuberculosis</i> | GCA_002447155.1_ASM244715v1_genomic.fna |
| 6565 | <i>Helicobacter pylori</i>        | GCA_001653395.1_ASM165339v1_genomic.fna |
| 6566 | <i>Neisseria meningitidis</i>     | GCA_002073675.1_ASM207367v1_genomic.fna |
| 6567 | <i>Pseudomonas aeruginosa</i>     | GCA_002075065.1_ASM207506v1_genomic.fna |
| 6568 | <i>Klebsiella pneumoniae</i>      | GCA_001885255.2_ASM188525v2_genomic.fna |
| 6569 | <i>Bordetella pertussis</i>       | GCA_001985025.1_ASM198502v1_genomic.fna |
| 6570 | <i>Bordetella pertussis</i>       | GCA_001985045.1_ASM198504v1_genomic.fna |
| 6571 | <i>Klebsiella pneumoniae</i>      | GCA_001902195.1_ASM190219v1_genomic.fna |
| 6572 | <i>Pseudomonas aeruginosa</i>     | GCA_002085605.1_ASM208560v1_genomic.fna |
| 6573 | <i>Neisseria meningitidis</i>     | GCA_002075815.1_ASM207581v1_genomic.fna |
| 6574 | <i>Helicobacter pylori</i>        | GCA_001653415.1_ASM165341v1_genomic.fna |
| 6575 | <i>Mycobacterium tuberculosis</i> | GCA_002447175.1_ASM244717v1_genomic.fna |
| 6576 | <i>Escherichia coli</i>           | GCA_000732965.1_ASM73296v1_genomic.fna  |
| 6577 | <i>Listeria monocytogenes</i>     | GCA_001913195.1_ASM191319v1_genomic.fna |
| 6578 | <i>Staphylococcus aureus</i>      | GCA_001296985.1_ASM129698v1_genomic.fna |
| 6579 | <i>Campylobacter jejuni</i>       | GCA_001507005.1_ASM150700v1_genomic.fna |
| 6580 | <i>Salmonella enterica</i>        | GCA_000493675.1_DT104_genomic.fna       |
| 6581 | <i>Campylobacter jejuni</i>       | GCA_001507025.1_ASM150702v1_genomic.fna |
| 6582 | <i>Salmonella enterica</i>        | GCA_000494385.2_ASM49438v2_genomic.fna  |
| 6583 | <i>Staphylococcus aureus</i>      | GCA_001298325.2_ASM129832v2_genomic.fna |
| 6584 | <i>Listeria monocytogenes</i>     | GCA_001952735.1_ASM195273v1_genomic.fna |
| 6585 | <i>Escherichia coli</i>           | GCA_000743255.1_ASM74325v1_genomic.fna  |
| 6586 | <i>Mycobacterium tuberculosis</i> | GCA_002447195.1_ASM244719v1_genomic.fna |
| 6587 | <i>Helicobacter pylori</i>        | GCA_001653435.1_ASM165343v1_genomic.fna |
| 6588 | <i>Neisseria meningitidis</i>     | GCA_002556585.1_ASM255658v1_genomic.fna |
| 6589 | <i>Pseudomonas putida</i>         | GCA_000281215.1_ASM28121v1_genomic.fna  |
| 6590 | <i>Pseudomonas aeruginosa</i>     | GCA_002085755.1_ASM208575v1_genomic.fna |
| 6591 | <i>Klebsiella pneumoniae</i>      | GCA_001902215.1_ASM190221v1_genomic.fna |
| 6592 | <i>Bordetella pertussis</i>       | GCA_001985065.1_ASM198506v1_genomic.fna |
| 6593 | <i>Bordetella pertussis</i>       | GCA_001985085.1_ASM198508v1_genomic.fna |

|      |                                   |                                         |
|------|-----------------------------------|-----------------------------------------|
| 6594 | <i>Klebsiella pneumoniae</i>      | GCA_001902235.1_ASM190223v1_genomic.fna |
| 6595 | <i>Pseudomonas aeruginosa</i>     | GCA_002104595.1_ASM210459v1_genomic.fna |
| 6596 | <i>Helicobacter pylori</i>        | GCA_001653455.1_ASM165345v1_genomic.fna |
| 6597 | <i>Mycobacterium tuberculosis</i> | GCA_002447215.1_ASM244721v1_genomic.fna |
| 6598 | <i>Escherichia coli</i>           | GCA_000750555.1_ASM75055v1_genomic.fna  |
| 6599 | <i>Listeria monocytogenes</i>     | GCA_001952755.1_ASM195275v1_genomic.fna |
| 6600 | <i>Staphylococcus aureus</i>      | GCA_001307235.1_ASM130723v1_genomic.fna |
| 6601 | <i>Campylobacter jejuni</i>       | GCA_001507045.1_ASM150704v1_genomic.fna |
| 6602 | <i>Salmonella enterica</i>        | GCA_000503845.1_ASM50384v1_genomic.fna  |
| 6603 | <i>Campylobacter jejuni</i>       | GCA_001507065.1_ASM150706v1_genomic.fna |
| 6604 | <i>Salmonella enterica</i>        | GCA_000505365.2_ASM50536v2_genomic.fna  |
| 6605 | <i>Staphylococcus aureus</i>      | GCA_001444345.1_ASM144434v1_genomic.fna |
| 6606 | <i>Listeria monocytogenes</i>     | GCA_001952775.1_ASM195277v1_genomic.fna |
| 6607 | <i>Escherichia coli</i>           | GCA_000784925.1_ASM78492v1_genomic.fna  |
| 6608 | <i>Mycobacterium tuberculosis</i> | GCA_002447235.1_ASM244723v1_genomic.fna |
| 6609 | <i>Helicobacter pylori</i>        | GCA_001653475.1_ASM165347v1_genomic.fna |
| 6610 | <i>Pseudomonas aeruginosa</i>     | GCA_002104615.1_ASM210461v1_genomic.fna |
| 6611 | <i>Klebsiella pneumoniae</i>      | GCA_001902255.1_ASM190225v1_genomic.fna |
| 6612 | <i>Bordetella pertussis</i>       | GCA_001985105.1_ASM198510v1_genomic.fna |
| 6613 | <i>Bordetella pertussis</i>       | GCA_001985125.1_ASM198512v1_genomic.fna |
| 6614 | <i>Klebsiella pneumoniae</i>      | GCA_001902335.1_ASM190233v1_genomic.fna |
| 6615 | <i>Pseudomonas aeruginosa</i>     | GCA_002192475.1_ASM219247v1_genomic.fna |
| 6616 | <i>Helicobacter pylori</i>        | GCA_001991095.1_ASM199109v1_genomic.fna |
| 6617 | <i>Mycobacterium tuberculosis</i> | GCA_002447255.1_ASM244725v1_genomic.fna |
| 6618 | <i>Escherichia coli</i>           | GCA_000800215.1_ASM80021v1_genomic.fna  |
| 6619 | <i>Listeria monocytogenes</i>     | GCA_001952795.1_ASM195279v1_genomic.fna |
| 6620 | <i>Staphylococcus aureus</i>      | GCA_001456215.1_ASM145621v1_genomic.fna |
| 6621 | <i>Campylobacter jejuni</i>       | GCA_001507085.1_ASM150708v1_genomic.fna |
| 6622 | <i>Salmonella enterica</i>        | GCA_000505705.1_ASM50570v1_genomic.fna  |
| 6623 | <i>Salmonella enterica</i>        | GCA_000612325.1_ASM61232v1_genomic.fna  |
| 6624 | <i>Campylobacter jejuni</i>       | GCA_001507105.1_ASM150710v1_genomic.fna |
| 6625 | <i>Staphylococcus aureus</i>      | GCA_001457495.1_NCTC13435_genomic.fna   |
| 6626 | <i>Listeria monocytogenes</i>     | GCA_001998915.1_ASM199891v1_genomic.fna |
| 6627 | <i>Escherichia coli</i>           | GCA_000800765.1_ASM80076v1_genomic.fna  |

|      |                                   |                                         |
|------|-----------------------------------|-----------------------------------------|
| 6628 | <i>Mycobacterium tuberculosis</i> | GCA_002447275.1_ASM244727v1_genomic.fna |
| 6629 | <i>Helicobacter pylori</i>        | GCA_002005525.1_ASM200552v1_genomic.fna |
| 6630 | <i>Pseudomonas aeruginosa</i>     | GCA_002192495.1_ASM219249v1_genomic.fna |
| 6631 | <i>Klebsiella pneumoniae</i>      | GCA_001902355.1_ASM190235v1_genomic.fna |
| 6632 | <i>Bordetella pertussis</i>       | GCA_001985145.1_ASM198514v1_genomic.fna |
| 6633 | <i>Bordetella pertussis</i>       | GCA_001985165.1_ASM198516v1_genomic.fna |
| 6634 | <i>Klebsiella pneumoniae</i>      | GCA_001902395.1_ASM190239v1_genomic.fna |
| 6635 | <i>Pseudomonas aeruginosa</i>     | GCA_002205335.1_ASM220533v1_genomic.fna |
| 6636 | <i>Helicobacter pylori</i>        | GCA_002222575.1_ASM222257v1_genomic.fna |
| 6637 | <i>Mycobacterium tuberculosis</i> | GCA_002447295.1_ASM244729v1_genomic.fna |
| 6638 | <i>Escherichia coli</i>           | GCA_000800845.2_ASM80084v2_genomic.fna  |
| 6639 | <i>Listeria monocytogenes</i>     | GCA_001998945.1_ASM199894v1_genomic.fna |
| 6640 | <i>Staphylococcus aureus</i>      | GCA_001465635.1_ASM146563v1_genomic.fna |
| 6641 | <i>Campylobacter jejuni</i>       | GCA_001507125.1_ASM150712v1_genomic.fna |
| 6642 | <i>Salmonella enterica</i>        | GCA_000623055.2_ASM62305v2_genomic.fna  |
| 6643 | <i>Campylobacter jejuni</i>       | GCA_001507145.1_ASM150714v1_genomic.fna |
| 6644 | <i>Salmonella enterica</i>        | GCA_000623095.2_ASM62309v2_genomic.fna  |
| 6645 | <i>Staphylococcus aureus</i>      | GCA_001465675.1_ASM146567v1_genomic.fna |
| 6646 | <i>Listeria monocytogenes</i>     | GCA_001998985.1_ASM199898v1_genomic.fna |
| 6647 | <i>Mycobacterium tuberculosis</i> | GCA_002447315.1_ASM244731v1_genomic.fna |
| 6648 | <i>Escherichia coli</i>           | GCA_000801165.1_ASM80116v1_genomic.fna  |
| 6649 | <i>Helicobacter pylori</i>        | GCA_002356595.1_ASM235659v1_genomic.fna |
| 6650 | <i>Pseudomonas aeruginosa</i>     | GCA_002205355.1_ASM220535v1_genomic.fna |
| 6651 | <i>Klebsiella pneumoniae</i>      | GCA_001902415.1_ASM190241v1_genomic.fna |
| 6652 | <i>Bordetella pertussis</i>       | GCA_001985205.1_ASM198520v1_genomic.fna |
| 6653 | <i>Bordetella pertussis</i>       | GCA_001985225.1_ASM198522v1_genomic.fna |
| 6654 | <i>Klebsiella pneumoniae</i>      | GCA_001902435.1_ASM190243v1_genomic.fna |
| 6655 | <i>Pseudomonas aeruginosa</i>     | GCA_002205375.1_ASM220537v1_genomic.fna |
| 6656 | <i>Helicobacter pylori</i>        | GCA_900119955.1_HE171_09_genomic.fna    |
| 6657 | <i>Escherichia coli</i>           | GCA_000801185.2_ASM80118v2_genomic.fna  |
| 6658 | <i>Mycobacterium tuberculosis</i> | GCA_002447335.1_ASM244733v1_genomic.fna |
| 6659 | <i>Listeria monocytogenes</i>     | GCA_001999005.1_ASM199900v1_genomic.fna |
| 6660 | <i>Staphylococcus aureus</i>      | GCA_001465755.1_ASM146575v1_genomic.fna |
| 6661 | <i>Salmonella enterica</i>        | GCA_000623115.2_ASM62311v2_genomic.fna  |

|      |                            |                                         |
|------|----------------------------|-----------------------------------------|
| 6662 | Campylobacter jejuni       | GCA_001507165.1_ASM150716v1_genomic.fna |
| 6663 | Campylobacter jejuni       | GCA_001507185.1_ASM150718v1_genomic.fna |
| 6664 | Salmonella enterica        | GCA_000623135.2_ASM62313v2_genomic.fna  |
| 6665 | Staphylococcus aureus      | GCA_001515665.1_ASM151566v1_genomic.fna |
| 6666 | Listeria monocytogenes     | GCA_001999025.1_ASM199902v1_genomic.fna |
| 6667 | Mycobacterium tuberculosis | GCA_002447355.1_ASM244735v1_genomic.fna |
| 6668 | Escherichia coli           | GCA_000801205.1_ASM80120v1_genomic.fna  |
| 6669 | Helicobacter pylori        | GCA_900119995.1_HE143_09_genomic.fna    |
| 6670 | Pseudomonas aeruginosa     | GCA_002208645.1_ASM220864v1_genomic.fna |
| 6671 | Klebsiella pneumoniae      | GCA_001902475.1_ASM190247v1_genomic.fna |
| 6672 | Bordetella pertussis       | GCA_001985245.1_ASM198524v1_genomic.fna |
| 6673 | Bacillus velezensis        | GCA_001634675.1_ASM163467v1_genomic.fna |
| 6674 | Bordetella pertussis       | GCA_001985265.1_ASM198526v1_genomic.fna |
| 6675 | Klebsiella pneumoniae      | GCA_001902515.1_ASM190251v1_genomic.fna |
| 6676 | Pseudomonas aeruginosa     | GCA_002215345.1_ASM221534v1_genomic.fna |
| 6677 | Helicobacter pylori        | GCA_900120055.1_HE178_09_genomic.fna    |
| 6678 | Escherichia coli           | GCA_000803705.1_ASM80370v1_genomic.fna  |
| 6679 | Mycobacterium tuberculosis | GCA_002447375.1_ASM244737v1_genomic.fna |
| 6680 | Listeria monocytogenes     | GCA_001999045.1_ASM199904v1_genomic.fna |
| 6681 | Staphylococcus aureus      | GCA_001515685.1_ASM151568v1_genomic.fna |
| 6682 | Campylobacter jejuni       | GCA_001507205.1_ASM150720v1_genomic.fna |
| 6683 | Salmonella enterica        | GCA_000623195.2_ASM62319v2_genomic.fna  |
| 6684 | Salmonella enterica        | GCA_000623275.1_ASM62327v1_genomic.fna  |
| 6685 | Campylobacter jejuni       | GCA_001507225.1_ASM150722v1_genomic.fna |
| 6686 | Staphylococcus aureus      | GCA_001515705.1_ASM151570v1_genomic.fna |
| 6687 | Listeria monocytogenes     | GCA_001999065.1_ASM199906v1_genomic.fna |
| 6688 | Mycobacterium tuberculosis | GCA_002447395.1_ASM244739v1_genomic.fna |
| 6689 | Escherichia coli           | GCA_000813165.1_ASM81316v1_genomic.fna  |
| 6690 | Helicobacter pylori        | GCA_900120135.1_HE132_09_genomic.fna    |
| 6691 | Pseudomonas aeruginosa     | GCA_002223805.1_ASM222380v1_genomic.fna |
| 6692 | Klebsiella pneumoniae      | GCA_001902535.1_ASM190253v1_genomic.fna |
| 6693 | Bordetella pertussis       | GCA_001985285.1_ASM198528v1_genomic.fna |
| 6694 | Bacillus velezensis        | GCA_002201935.1_ASM220193v1_genomic.fna |
| 6695 | Bacillus velezensis        | GCA_002201975.1_ASM220197v1_genomic.fna |

|      |                                   |                                         |
|------|-----------------------------------|-----------------------------------------|
| 6696 | <i>Bordetella pertussis</i>       | GCA_001985305.1_ASM198530v1_genomic.fna |
| 6697 | <i>Klebsiella pneumoniae</i>      | GCA_001908515.1_ASM190851v1_genomic.fna |
| 6698 | <i>Pseudomonas aeruginosa</i>     | GCA_002237405.1_ASM223740v1_genomic.fna |
| 6699 | <i>Helicobacter pylori</i>        | GCA_900120185.1_HE134_09_genomic.fna    |
| 6700 | <i>Escherichia coli</i>           | GCA_000814145.2_ASM81414v2_genomic.fna  |
| 6701 | <i>Mycobacterium tuberculosis</i> | GCA_002447415.1_ASM244741v1_genomic.fna |
| 6702 | <i>Listeria monocytogenes</i>     | GCA_001999085.1_ASM199908v1_genomic.fna |
| 6703 | <i>Staphylococcus aureus</i>      | GCA_001515745.1_ASM151574v1_genomic.fna |
| 6704 | <i>Campylobacter jejuni</i>       | GCA_001507245.1_ASM150724v1_genomic.fna |
| 6705 | <i>Salmonella enterica</i>        | GCA_000623295.1_ASM62329v1_genomic.fna  |
| 6706 | <i>Salmonella enterica</i>        | GCA_000623315.1_ASM62331v1_genomic.fna  |
| 6707 | <i>Campylobacter jejuni</i>       | GCA_001507265.1_ASM150726v1_genomic.fna |
| 6708 | <i>Staphylococcus aureus</i>      | GCA_001515765.1_ASM151576v1_genomic.fna |
| 6709 | <i>Listeria monocytogenes</i>     | GCA_001999105.1_ASM199910v1_genomic.fna |
| 6710 | <i>Mycobacterium tuberculosis</i> | GCA_002447435.1_ASM244743v1_genomic.fna |
| 6711 | <i>Escherichia coli</i>           | GCA_000819645.1_ASM81964v1_genomic.fna  |
| 6712 | <i>Helicobacter pylori</i>        | GCA_900120205.1_HE141_09_genomic.fna    |
| 6713 | <i>Pseudomonas aeruginosa</i>     | GCA_002237425.1_ASM223742v1_genomic.fna |
| 6714 | <i>Klebsiella pneumoniae</i>      | GCA_001908595.1_ASM190859v1_genomic.fna |
| 6715 | <i>Bordetella pertussis</i>       | GCA_001985325.1_ASM198532v1_genomic.fna |
| 6716 | <i>Bordetella pertussis</i>       | GCA_001985345.1_ASM198534v1_genomic.fna |
| 6717 | <i>Klebsiella pneumoniae</i>      | GCA_001908625.1_ASM190862v1_genomic.fna |
| 6718 | <i>Pseudomonas aeruginosa</i>     | GCA_002442855.1_ASM244285v1_genomic.fna |
| 6719 | <i>Helicobacter pylori</i>        | GCA_900120225.1_HE136_09_genomic.fna    |
| 6720 | <i>Escherichia coli</i>           | GCA_000827105.1_ASM82710v1_genomic.fna  |
| 6721 | <i>Mycobacterium tuberculosis</i> | GCA_002447455.1_ASM244745v1_genomic.fna |
| 6722 | <i>Listeria monocytogenes</i>     | GCA_001999125.1_ASM199912v1_genomic.fna |
| 6723 | <i>Staphylococcus aureus</i>      | GCA_001548295.1_ASM154829v1_genomic.fna |
| 6724 | <i>Campylobacter jejuni</i>       | GCA_001563565.1_ASM156356v1_genomic.fna |
| 6725 | <i>Salmonella enterica</i>        | GCA_000623335.1_ASM62333v1_genomic.fna  |
| 6726 | <i>Salmonella enterica</i>        | GCA_000623355.1_ASM62335v1_genomic.fna  |
| 6727 | <i>Campylobacter jejuni</i>       | GCA_001587015.1_ASM158701v1_genomic.fna |
| 6728 | <i>Staphylococcus aureus</i>      | GCA_001548415.1_ASM154841v1_genomic.fna |
| 6729 | <i>Listeria monocytogenes</i>     | GCA_001999145.1_ASM199914v1_genomic.fna |

|      |                                   |                                           |
|------|-----------------------------------|-------------------------------------------|
| 6730 | <i>Mycobacterium tuberculosis</i> | GCA_002447475.1_ASM244747v1_genomic.fna   |
| 6731 | <i>Escherichia coli</i>           | GCA_000829985.1_ASM82998v1_genomic.fna    |
| 6732 | <i>Helicobacter pylori</i>        | GCA_900120255.1_HE101_09_genomic.fna      |
| 6733 | <i>Pseudomonas aeruginosa</i>     | GCA_900069025.1_ASM90006902v1_genomic.fna |
| 6734 | <i>Klebsiella pneumoniae</i>      | GCA_001908655.1_ASM190865v1_genomic.fna   |
| 6735 | <i>Bordetella pertussis</i>       | GCA_001985365.1_ASM198536v1_genomic.fna   |
| 6736 | <i>Bordetella pertussis</i>       | GCA_001985385.1_ASM198538v1_genomic.fna   |
| 6737 | <i>Klebsiella pneumoniae</i>      | GCA_001908675.1_ASM190867v1_genomic.fna   |
| 6738 | <i>Pseudomonas aeruginosa</i>     | GCA_900070375.1_PAO1OR_genomic.fna        |
| 6739 | <i>Helicobacter pylori</i>        | GCA_900120275.1_HE142_09_genomic.fna      |
| 6740 | <i>Mycobacterium bovis</i>        | GCA_001544735.1_ASM154473v1_genomic.fna   |
| 6741 | <i>Escherichia coli</i>           | GCA_000830035.1_ASM83003v1_genomic.fna    |
| 6742 | <i>Mycobacterium tuberculosis</i> | GCA_002447495.1_ASM244749v1_genomic.fna   |
| 6743 | <i>Listeria monocytogenes</i>     | GCA_001999165.1_ASM199916v1_genomic.fna   |
| 6744 | <i>Staphylococcus aureus</i>      | GCA_001549655.1_ASM154965v1_genomic.fna   |
| 6745 | <i>Campylobacter jejuni</i>       | GCA_001587035.1_ASM158703v1_genomic.fna   |
| 6746 | <i>Salmonella enterica</i>        | GCA_000623375.1_ASM62337v1_genomic.fna    |
| 6747 | <i>Campylobacter jejuni</i>       | GCA_001686905.1_ASM168690v1_genomic.fna   |
| 6748 | <i>Salmonella enterica</i>        | GCA_000623395.2_ASM62339v2_genomic.fna    |
| 6749 | <i>Staphylococcus aureus</i>      | GCA_001549675.1_ASM154967v1_genomic.fna   |
| 6750 | <i>Listeria monocytogenes</i>     | GCA_002043045.1_ASM204304v1_genomic.fna   |
| 6751 | <i>Mycobacterium tuberculosis</i> | GCA_002447515.1_ASM244751v1_genomic.fna   |
| 6752 | <i>Escherichia coli</i>           | GCA_000831565.1_ASM83156v1_genomic.fna    |
| 6753 | <i>Mycobacterium bovis</i>        | GCA_001544775.1_ASM154477v1_genomic.fna   |
| 6754 | <i>Helicobacter pylori</i>        | GCA_900120315.1_HE170_09_genomic.fna      |
| 6755 | <i>Pseudomonas aeruginosa</i>     | GCA_900095805.1_PA14Or_genomic.fna        |
| 6756 | <i>Klebsiella pneumoniae</i>      | GCA_001908695.1_ASM190869v1_genomic.fna   |
| 6757 | <i>Bordetella pertussis</i>       | GCA_001985405.1_ASM198540v1_genomic.fna   |
| 6758 | <i>Bordetella pertussis</i>       | GCA_001985425.1_ASM198542v1_genomic.fna   |
| 6759 | <i>Klebsiella pneumoniae</i>      | GCA_001908715.1_ASM190871v1_genomic.fna   |
| 6760 | <i>Pseudomonas aeruginosa</i>     | GCA_900149285.1_PcyII-10_genomic.fna      |
| 6761 | <i>Helicobacter pylori</i>        | GCA_900120335.1_HE147_09_genomic.fna      |
| 6762 | <i>Escherichia coli</i>           | GCA_000833145.1_ASM83314v1_genomic.fna    |
| 6763 | <i>Mycobacterium tuberculosis</i> | GCA_002447535.1_ASM244753v1_genomic.fna   |

|      |                                   |                                         |
|------|-----------------------------------|-----------------------------------------|
| 6764 | <i>Listeria monocytogenes</i>     | GCA_002101275.1_ASM210127v1_genomic.fna |
| 6765 | <i>Staphylococcus aureus</i>      | GCA_001558795.1_ASM155879v1_genomic.fna |
| 6766 | <i>Salmonella enterica</i>        | GCA_000623455.2_ASM62345v2_genomic.fna  |
| 6767 | <i>Campylobacter jejuni</i>       | GCA_001717625.1_ASM171762v1_genomic.fna |
| 6768 | <i>Campylobacter jejuni</i>       | GCA_001721945.1_ASM172194v1_genomic.fna |
| 6769 | <i>Salmonella enterica</i>        | GCA_000623475.2_ASM62347v2_genomic.fna  |
| 6770 | <i>Staphylococcus aureus</i>      | GCA_001580495.1_ASM158049v1_genomic.fna |
| 6771 | <i>Listeria monocytogenes</i>     | GCA_002105615.1_ASM210561v1_genomic.fna |
| 6772 | <i>Mycobacterium tuberculosis</i> | GCA_002447555.1_ASM244755v1_genomic.fna |
| 6773 | <i>Helicobacter pylori</i>        | GCA_900149805.1_BCM-300_genomic.fna     |
| 6774 | <i>Escherichia coli</i>           | GCA_000833635.2_ASM83363v2_genomic.fna  |
| 6775 | <i>Pseudomonas aeruginosa</i>     | GCA_900185255.1_NN2_genomic.fna         |
| 6776 | <i>Klebsiella pneumoniae</i>      | GCA_001908875.1_ASM190887v1_genomic.fna |
| 6777 | <i>Bordetella pertussis</i>       | GCA_001985445.1_ASM198544v1_genomic.fna |
| 6778 | <i>Bordetella pertussis</i>       | GCA_001985465.1_ASM198546v1_genomic.fna |
| 6779 | <i>Klebsiella pneumoniae</i>      | GCA_001908895.1_ASM190889v1_genomic.fna |
| 6780 | <i>Helicobacter pylori</i>        | GCA_900176185.1_HE93_10_genomic.fna     |
| 6781 | <i>Mycobacterium tuberculosis</i> | GCA_002447575.1_ASM244757v1_genomic.fna |
| 6782 | <i>Escherichia coli</i>           | GCA_000931565.1_ASM93156v1_genomic.fna  |
| 6783 | <i>Listeria monocytogenes</i>     | GCA_002105635.1_ASM210563v1_genomic.fna |
| 6784 | <i>Staphylococcus aureus</i>      | GCA_001580515.1_ASM158051v1_genomic.fna |
| 6785 | <i>Salmonella enterica</i>        | GCA_000623615.2_ASM62361v2_genomic.fna  |
| 6786 | <i>Campylobacter jejuni</i>       | GCA_001721965.1_ASM172196v1_genomic.fna |
| 6787 | <i>Campylobacter jejuni</i>       | GCA_001721985.1_ASM172198v1_genomic.fna |
| 6788 | <i>Salmonella enterica</i>        | GCA_000623655.2_ASM62365v2_genomic.fna  |
| 6789 | <i>Staphylococcus aureus</i>      | GCA_001594205.1_ASM159420v1_genomic.fna |
| 6790 | <i>Listeria monocytogenes</i>     | GCA_002105655.1_ASM210565v1_genomic.fna |
| 6791 | <i>Escherichia coli</i>           | GCA_000952955.1_EcRV308Chr_genomic.fna  |
| 6792 | <i>Mycobacterium tuberculosis</i> | GCA_002447595.1_ASM244759v1_genomic.fna |
| 6793 | <i>Klebsiella pneumoniae</i>      | GCA_001913175.1_ASM191317v1_genomic.fna |
| 6794 | <i>Bordetella pertussis</i>       | GCA_001985485.1_ASM198548v1_genomic.fna |
| 6795 | <i>Bordetella pertussis</i>       | GCA_001985505.1_ASM198550v1_genomic.fna |
| 6796 | <i>Klebsiella pneumoniae</i>      | GCA_001922465.1_ASM192246v1_genomic.fna |
| 6797 | <i>Mycobacterium tuberculosis</i> | GCA_002447615.1_ASM244761v1_genomic.fna |



|      |                                   |                                           |
|------|-----------------------------------|-------------------------------------------|
| 6798 | <i>Escherichia coli</i>           | GCA_000953515.1_EcHMS174Chr_genomic.fna   |
| 6799 | <i>Listeria monocytogenes</i>     | GCA_002105675.1_ASM210567v1_genomic.fna   |
| 6800 | <i>Staphylococcus aureus</i>      | GCA_001611325.1_ASM161132v1_genomic.fna   |
| 6801 | <i>Salmonella enterica</i>        | GCA_000623675.2_ASM62367v2_genomic.fna    |
| 6802 | <i>Campylobacter jejuni</i>       | GCA_001767215.1_ASM176721v1_genomic.fna   |
| 6803 | <i>Campylobacter jejuni</i>       | GCA_001865395.1_ASM186539v1_genomic.fna   |
| 6804 | <i>Salmonella enterica</i>        | GCA_000623715.2_ASM62371v2_genomic.fna    |
| 6805 | <i>Staphylococcus aureus</i>      | GCA_001611345.1_ASM161134v1_genomic.fna   |
| 6806 | <i>Listeria monocytogenes</i>     | GCA_002105695.1_ASM210569v1_genomic.fna   |
| 6807 | <i>Mycobacterium tuberculosis</i> | GCA_002447635.1_ASM244763v1_genomic.fna   |
| 6808 | <i>Escherichia coli</i>           | GCA_000967155.1_HUSEC2011CHR1_genomic.fna |
| 6809 | <i>Klebsiella pneumoniae</i>      | GCA_001936035.1_ASM193603v1_genomic.fna   |
| 6810 | <i>Bordetella pertussis</i>       | GCA_001985525.1_ASM198552v1_genomic.fna   |
| 6811 | <i>Bordetella pertussis</i>       | GCA_001985545.1_ASM198554v1_genomic.fna   |
| 6812 | <i>Klebsiella pneumoniae</i>      | GCA_001952835.1_ASM195283v1_genomic.fna   |
| 6813 | <i>Mycobacterium tuberculosis</i> | GCA_002447655.1_ASM244765v1_genomic.fna   |
| 6814 | <i>Escherichia coli</i>           | GCA_000968515.1_ASM96851v1_genomic.fna    |
| 6815 | <i>Listeria monocytogenes</i>     | GCA_002105715.1_ASM210571v1_genomic.fna   |
| 6816 | <i>Staphylococcus aureus</i>      | GCA_001611365.1_ASM161136v1_genomic.fna   |
| 6817 | <i>Salmonella enterica</i>        | GCA_000623735.2_ASM62373v2_genomic.fna    |
| 6818 | <i>Campylobacter jejuni</i>       | GCA_001865415.1_ASM186541v1_genomic.fna   |
| 6819 | <i>Campylobacter jejuni</i>       | GCA_001865435.1_ASM186543v1_genomic.fna   |
| 6820 | <i>Salmonella enterica</i>        | GCA_000624055.2_ASM62405v2_genomic.fna    |
| 6821 | <i>Staphylococcus aureus</i>      | GCA_001611385.1_ASM161138v1_genomic.fna   |
| 6822 | <i>Listeria monocytogenes</i>     | GCA_002208215.1_ASM220821v1_genomic.fna   |
| 6823 | <i>Escherichia coli</i>           | GCA_000971615.1_ASM97161v1_genomic.fna    |
| 6824 | <i>Mycobacterium tuberculosis</i> | GCA_002447675.1_ASM244767v1_genomic.fna   |
| 6825 | <i>Klebsiella pneumoniae</i>      | GCA_001952875.1_ASM195287v1_genomic.fna   |
| 6826 | <i>Bordetella pertussis</i>       | GCA_001985565.1_ASM198556v1_genomic.fna   |
| 6827 | <i>Bordetella pertussis</i>       | GCA_001985585.1_ASM198558v1_genomic.fna   |
| 6828 | <i>Klebsiella pneumoniae</i>      | GCA_001952895.1_ASM195289v1_genomic.fna   |
| 6829 | <i>Mycobacterium tuberculosis</i> | GCA_002447695.1_ASM244769v1_genomic.fna   |
| 6830 | <i>Escherichia coli</i>           | GCA_000974405.1_ASM97440v1_genomic.fna    |
| 6831 | <i>Listeria monocytogenes</i>     | GCA_002213505.1_ASM221350v1_genomic.fna   |

|      |                                   |                                         |
|------|-----------------------------------|-----------------------------------------|
| 6832 | <i>Staphylococcus aureus</i>      | GCA_001611405.1_ASM161140v1_genomic.fna |
| 6833 | <i>Campylobacter jejuni</i>       | GCA_001865595.1_ASM186559v1_genomic.fna |
| 6834 | <i>Salmonella enterica</i>        | GCA_000624155.1_ASM62415v1_genomic.fna  |
| 6835 | <i>Campylobacter jejuni</i>       | GCA_001865615.1_ASM186561v1_genomic.fna |
| 6836 | <i>Salmonella enterica</i>        | GCA_000624175.2_ASM62417v2_genomic.fna  |
| 6837 | <i>Staphylococcus aureus</i>      | GCA_001611425.1_ASM161142v1_genomic.fna |
| 6838 | <i>Listeria monocytogenes</i>     | GCA_002213545.1_ASM221354v1_genomic.fna |
| 6839 | <i>Escherichia coli</i>           | GCA_000974465.1_ASM97446v1_genomic.fna  |
| 6840 | <i>Mycobacterium tuberculosis</i> | GCA_002447715.1_ASM244771v1_genomic.fna |
| 6841 | <i>Klebsiella pneumoniae</i>      | GCA_001952915.1_ASM195291v1_genomic.fna |
| 6842 | <i>Bordetella pertussis</i>       | GCA_001985605.1_ASM198560v1_genomic.fna |
| 6843 | <i>Bordetella pertussis</i>       | GCA_001985625.1_ASM198562v1_genomic.fna |
| 6844 | <i>Klebsiella pneumoniae</i>      | GCA_001956965.1_ASM195696v1_genomic.fna |
| 6845 | <i>Xanthomonas citri</i>          | GCA_002240395.1_ASM224039v1_genomic.fna |
| 6846 | <i>Mycobacterium tuberculosis</i> | GCA_002447735.1_ASM244773v1_genomic.fna |
| 6847 | <i>Escherichia coli</i>           | GCA_000974505.1_ASM97450v1_genomic.fna  |
| 6848 | <i>Listeria monocytogenes</i>     | GCA_002213565.1_ASM221356v1_genomic.fna |
| 6849 | <i>Staphylococcus aureus</i>      | GCA_001618305.1_ASM161830v1_genomic.fna |
| 6850 | <i>Campylobacter jejuni</i>       | GCA_001870085.1_ASM187008v1_genomic.fna |
| 6851 | <i>Salmonella enterica</i>        | GCA_000624395.2_ASM62439v2_genomic.fna  |
| 6852 | <i>Campylobacter jejuni</i>       | GCA_001870105.1_ASM187010v1_genomic.fna |
| 6853 | <i>Salmonella enterica</i>        | GCA_000625855.2_ASM62585v2_genomic.fna  |
| 6854 | <i>Staphylococcus aureus</i>      | GCA_001640885.1_ASM164088v1_genomic.fna |
| 6855 | <i>Listeria monocytogenes</i>     | GCA_002213585.1_ASM221358v1_genomic.fna |
| 6856 | <i>Escherichia coli</i>           | GCA_000974535.1_ASM97453v1_genomic.fna  |
| 6857 | <i>Mycobacterium tuberculosis</i> | GCA_002447755.1_ASM244775v1_genomic.fna |
| 6858 | <i>Klebsiella pneumoniae</i>      | GCA_002009075.1_ASM200907v1_genomic.fna |
| 6859 | <i>Bordetella pertussis</i>       | GCA_001985645.1_ASM198564v1_genomic.fna |
| 6860 | <i>Bordetella pertussis</i>       | GCA_001985665.1_ASM198566v1_genomic.fna |
| 6861 | <i>Klebsiella pneumoniae</i>      | GCA_002055765.1_ASM205576v1_genomic.fna |
| 6862 | <i>Mycobacterium tuberculosis</i> | GCA_002447775.1_ASM244777v1_genomic.fna |
| 6863 | <i>Escherichia coli</i>           | GCA_000974575.1_ASM97457v1_genomic.fna  |
| 6864 | <i>Listeria monocytogenes</i>     | GCA_002213605.1_ASM221360v1_genomic.fna |
| 6865 | <i>Staphylococcus aureus</i>      | GCA_001640905.1_ASM164090v1_genomic.fna |

|      |                                   |                                           |
|------|-----------------------------------|-------------------------------------------|
| 6866 | <i>Salmonella enterica</i>        | GCA_000626095.2_ASM62609v2_genomic.fna    |
| 6867 | <i>Campylobacter jejuni</i>       | GCA_001951235.1_ASM195123v1_genomic.fna   |
| 6868 | <i>Campylobacter jejuni</i>       | GCA_001951255.1_ASM195125v1_genomic.fna   |
| 6869 | <i>Salmonella enterica</i>        | GCA_000626175.1_ASM62617v1_genomic.fna    |
| 6870 | <i>Staphylococcus aureus</i>      | GCA_001640925.1_ASM164092v1_genomic.fna   |
| 6871 | <i>Listeria monocytogenes</i>     | GCA_002213625.1_ASM221362v1_genomic.fna   |
| 6872 | <i>Escherichia coli</i>           | GCA_000974825.1_ASM97482v1_genomic.fna    |
| 6873 | <i>Mycobacterium tuberculosis</i> | GCA_002447795.1_ASM244779v1_genomic.fna   |
| 6874 | <i>Klebsiella pneumoniae</i>      | GCA_002055855.1_ASM205585v1_genomic.fna   |
| 6875 | <i>Bordetella pertussis</i>       | GCA_001985685.1_ASM198568v1_genomic.fna   |
| 6876 | <i>Bordetella pertussis</i>       | GCA_001985705.1_ASM198570v1_genomic.fna   |
| 6877 | <i>Klebsiella pneumoniae</i>      | GCA_002056385.1_ASM205638v1_genomic.fna   |
| 6878 | <i>Mycobacterium tuberculosis</i> | GCA_002447815.1_ASM244781v1_genomic.fna   |
| 6879 | <i>Escherichia coli</i>           | GCA_000974865.1_ASM97486v1_genomic.fna    |
| 6880 | <i>Listeria monocytogenes</i>     | GCA_002213645.1_ASM221364v1_genomic.fna   |
| 6881 | <i>Staphylococcus aureus</i>      | GCA_001641025.1_ASM164102v1_genomic.fna   |
| 6882 | <i>Salmonella enterica</i>        | GCA_000626195.1_ASM62619v1_genomic.fna    |
| 6883 | <i>Campylobacter jejuni</i>       | GCA_001951275.1_ASM195127v1_genomic.fna   |
| 6884 | <i>Campylobacter jejuni</i>       | GCA_001951295.1_ASM195129v1_genomic.fna   |
| 6885 | <i>Salmonella enterica</i>        | GCA_000626215.1_ASM62621v1_genomic.fna    |
| 6886 | <i>Staphylococcus aureus</i>      | GCA_001656045.1_ASM165604v1_genomic.fna   |
| 6887 | <i>Listeria monocytogenes</i>     | GCA_002213665.1_ASM221366v1_genomic.fna   |
| 6888 | <i>Escherichia coli</i>           | GCA_000974885.1_ASM97488v1_genomic.fna    |
| 6889 | <i>Mycobacterium tuberculosis</i> | GCA_002447835.1_ASM244783v1_genomic.fna   |
| 6890 | <i>Klebsiella pneumoniae</i>      | GCA_002056475.1_ASM205647v1_genomic.fna   |
| 6891 | <i>Bordetella pertussis</i>       | GCA_001985725.1_ASM198572v1_genomic.fna   |
| 6892 | <i>Bordetella pertussis</i>       | GCA_001985745.1_ASM198574v1_genomic.fna   |
| 6893 | <i>Klebsiella pneumoniae</i>      | GCA_002113865.1_ASM211386v1_genomic.fna   |
| 6894 | <i>Mycobacterium tuberculosis</i> | GCA_002447855.1_ASM244785v1_genomic.fna   |
| 6895 | <i>Escherichia coli</i>           | GCA_000981485.1_EcoliK12AG100_genomic.fna |
| 6896 | <i>Listeria monocytogenes</i>     | GCA_002213685.1_ASM221368v1_genomic.fna   |
| 6897 | <i>Staphylococcus aureus</i>      | GCA_001656075.1_ASM165607v1_genomic.fna   |
| 6898 | <i>Salmonella enterica</i>        | GCA_000626235.1_ASM62623v1_genomic.fna    |
| 6899 | <i>Campylobacter jejuni</i>       | GCA_001951315.1_ASM195131v1_genomic.fna   |

|      |                            |                                         |
|------|----------------------------|-----------------------------------------|
| 6900 | Campylobacter jejuni       | GCA_001951335.1_ASM195133v1_genomic.fna |
| 6901 | Salmonella enterica        | GCA_000626255.1_ASM62625v1_genomic.fna  |
| 6902 | Staphylococcus aureus      | GCA_001725965.1_ASM172596v1_genomic.fna |
| 6903 | Listeria monocytogenes     | GCA_002213705.1_ASM221370v1_genomic.fna |
| 6904 | Escherichia coli           | GCA_000986765.1_ASM98676v1_genomic.fna  |
| 6905 | Mycobacterium tuberculosis | GCA_002447875.1_ASM244787v1_genomic.fna |
| 6906 | Klebsiella pneumoniae      | GCA_002116885.1_ASM211688v1_genomic.fna |
| 6907 | Bordetella pertussis       | GCA_001985765.1_ASM198576v1_genomic.fna |
| 6908 | Bordetella pertussis       | GCA_001985785.1_ASM198578v1_genomic.fna |
| 6909 | Klebsiella pneumoniae      | GCA_002156725.1_ASM215672v1_genomic.fna |
| 6910 | Mycobacterium tuberculosis | GCA_002447895.1_ASM244789v1_genomic.fna |
| 6911 | Escherichia coli           | GCA_000987875.1_ASM98787v1_genomic.fna  |
| 6912 | Listeria monocytogenes     | GCA_002213725.1_ASM221372v1_genomic.fna |
| 6913 | Staphylococcus aureus      | GCA_001879545.1_ASM187954v1_genomic.fna |
| 6914 | Campylobacter jejuni       | GCA_002024325.1_ASM202432v1_genomic.fna |
| 6915 | Salmonella enterica        | GCA_000626275.2_ASM62627v2_genomic.fna  |
| 6916 | Campylobacter jejuni       | GCA_002028305.1_ASM202830v1_genomic.fna |
| 6917 | Salmonella enterica        | GCA_000626295.1_ASM62629v1_genomic.fna  |
| 6918 | Staphylococcus aureus      | GCA_001880265.1_ASM188026v1_genomic.fna |
| 6919 | Listeria monocytogenes     | GCA_002213745.1_ASM221374v1_genomic.fna |
| 6920 | Escherichia coli           | GCA_000988355.1_ASM98835v1_genomic.fna  |
| 6921 | Mycobacterium tuberculosis | GCA_002447915.1_ASM244791v1_genomic.fna |
| 6922 | Klebsiella pneumoniae      | GCA_002156745.1_ASM215674v1_genomic.fna |
| 6923 | Bordetella pertussis       | GCA_001985805.1_ASM198580v1_genomic.fna |
| 6924 | Bordetella pertussis       | GCA_001985825.1_ASM198582v1_genomic.fna |
| 6925 | Klebsiella pneumoniae      | GCA_002156765.1_ASM215676v1_genomic.fna |
| 6926 | Mycobacterium tuberculosis | GCA_002447935.1_ASM244793v1_genomic.fna |
| 6927 | Escherichia coli           | GCA_000988385.1_ASM98838v1_genomic.fna  |
| 6928 | Listeria monocytogenes     | GCA_002213765.1_ASM221376v1_genomic.fna |
| 6929 | Staphylococcus aureus      | GCA_001887075.1_ASM188707v1_genomic.fna |
| 6930 | Salmonella enterica        | GCA_000626335.1_ASM62633v1_genomic.fna  |
| 6931 | Campylobacter jejuni       | GCA_002101355.1_ASM210135v1_genomic.fna |
| 6932 | Salmonella enterica        | GCA_000626355.1_ASM62635v1_genomic.fna  |
| 6933 | Campylobacter jejuni       | GCA_002209005.1_ASM220900v1_genomic.fna |

|      |                                   |                                         |
|------|-----------------------------------|-----------------------------------------|
| 6934 | <i>Staphylococcus aureus</i>      | GCA_001900185.1_ASM190018v1_genomic.fna |
| 6935 | <i>Listeria monocytogenes</i>     | GCA_002213785.1_ASM221378v1_genomic.fna |
| 6936 | <i>Escherichia coli</i>           | GCA_000988465.1_ASM98846v1_genomic.fna  |
| 6937 | <i>Mycobacterium tuberculosis</i> | GCA_002447955.1_ASM244795v1_genomic.fna |
| 6938 | <i>Klebsiella pneumoniae</i>      | GCA_002156785.1_ASM215678v1_genomic.fna |
| 6939 | <i>Bordetella pertussis</i>       | GCA_001985845.1_ASM198584v1_genomic.fna |
| 6940 | <i>Bordetella pertussis</i>       | GCA_001985865.1_ASM198586v1_genomic.fna |
| 6941 | <i>Pasteurella multocida</i>      | GCA_001956675.1_ASM195667v1_genomic.fna |
| 6942 | <i>Klebsiella pneumoniae</i>      | GCA_002163895.1_ASM216389v1_genomic.fna |
| 6943 | <i>Mycobacterium tuberculosis</i> | GCA_002447975.1_ASM244797v1_genomic.fna |
| 6944 | <i>Escherichia coli</i>           | GCA_001007915.1_ASM100791v1_genomic.fna |
| 6945 | <i>Listeria monocytogenes</i>     | GCA_002213805.1_ASM221380v1_genomic.fna |
| 6946 | <i>Staphylococcus aureus</i>      | GCA_001956755.1_ASM195675v1_genomic.fna |
| 6947 | <i>Campylobacter jejuni</i>       | GCA_002209025.1_ASM220902v1_genomic.fna |
| 6948 | <i>Salmonella enterica</i>        | GCA_000626375.1_ASM62637v1_genomic.fna  |
| 6949 | <i>Campylobacter jejuni</i>       | GCA_002209045.1_ASM220904v1_genomic.fna |
| 6950 | <i>Salmonella enterica</i>        | GCA_000626695.2_ASM62669v2_genomic.fna  |
| 6951 | <i>Staphylococcus aureus</i>      | GCA_001956815.1_ASM195681v1_genomic.fna |
| 6952 | <i>Listeria monocytogenes</i>     | GCA_002213825.1_ASM221382v1_genomic.fna |
| 6953 | <i>Mycobacterium tuberculosis</i> | GCA_002447995.1_ASM244799v1_genomic.fna |
| 6954 | <i>Escherichia coli</i>           | GCA_001020945.2_ASM102094v2_genomic.fna |
| 6955 | <i>Klebsiella pneumoniae</i>      | GCA_002180075.1_ASM218007v1_genomic.fna |
| 6956 | <i>Pasteurella multocida</i>      | GCA_002068175.1_ASM206817v1_genomic.fna |
| 6957 | <i>Bordetella pertussis</i>       | GCA_001985885.1_ASM198588v1_genomic.fna |
| 6958 | <i>Bordetella pertussis</i>       | GCA_001985905.1_ASM198590v1_genomic.fna |
| 6959 | <i>Klebsiella pneumoniae</i>      | GCA_002180155.1_ASM218015v1_genomic.fna |
| 6960 | <i>Escherichia coli</i>           | GCA_001021005.2_ASM102100v2_genomic.fna |
| 6961 | <i>Mycobacterium tuberculosis</i> | GCA_002448015.1_ASM244801v1_genomic.fna |
| 6962 | <i>Listeria monocytogenes</i>     | GCA_002213845.1_ASM221384v1_genomic.fna |
| 6963 | <i>Staphylococcus aureus</i>      | GCA_001975005.1_ASM197500v1_genomic.fna |
| 6964 | <i>Campylobacter jejuni</i>       | GCA_002209065.1_ASM220906v1_genomic.fna |
| 6965 | <i>Salmonella enterica</i>        | GCA_000636135.1_ASM63613v1_genomic.fna  |
| 6966 | <i>Campylobacter jejuni</i>       | GCA_002214785.1_ASM221478v1_genomic.fna |
| 6967 | <i>Salmonella enterica</i>        | GCA_000715155.2_ASM71515v2_genomic.fna  |

|      |                                   |                                         |
|------|-----------------------------------|-----------------------------------------|
| 6968 | <i>Staphylococcus aureus</i>      | GCA_001975045.1_ASM197504v1_genomic.fna |
| 6969 | <i>Listeria monocytogenes</i>     | GCA_002213865.1_ASM221386v1_genomic.fna |
| 6970 | <i>Mycobacterium tuberculosis</i> | GCA_002448035.1_ASM244803v1_genomic.fna |
| 6971 | <i>Escherichia coli</i>           | GCA_001021595.1_ASM102159v1_genomic.fna |
| 6972 | <i>Klebsiella pneumoniae</i>      | GCA_002180175.1_ASM218017v1_genomic.fna |
| 6973 | <i>Bordetella pertussis</i>       | GCA_001985925.1_ASM198592v1_genomic.fna |
| 6974 | <i>Bordetella pertussis</i>       | GCA_001985945.1_ASM198594v1_genomic.fna |
| 6975 | <i>Klebsiella pneumoniae</i>      | GCA_002180255.1_ASM218025v1_genomic.fna |
| 6976 | <i>Escherichia coli</i>           | GCA_001021615.1_APECO18_genomic.fna     |
| 6977 | <i>Mycobacterium tuberculosis</i> | GCA_002448055.1_ASM244805v1_genomic.fna |
| 6978 | <i>Listeria monocytogenes</i>     | GCA_002213885.1_ASM221388v1_genomic.fna |
| 6979 | <i>Staphylococcus aureus</i>      | GCA_001986135.1_ASM198613v1_genomic.fna |
| 6980 | <i>Salmonella enterica</i>        | GCA_000742815.1_ASM74281v1_genomic.fna  |
| 6981 | <i>Campylobacter jejuni</i>       | GCA_002224325.1_ASM222432v1_genomic.fna |
| 6982 | <i>Campylobacter jejuni</i>       | GCA_002224385.1_ASM222438v1_genomic.fna |
| 6983 | <i>Salmonella enterica</i>        | GCA_000743055.1_ASM74305v1_genomic.fna  |
| 6984 | <i>Staphylococcus aureus</i>      | GCA_002000565.1_ASM200056v1_genomic.fna |
| 6985 | <i>Listeria monocytogenes</i>     | GCA_002213905.1_ASM221390v1_genomic.fna |
| 6986 | <i>Mycobacterium tuberculosis</i> | GCA_002448075.1_ASM244807v1_genomic.fna |
| 6987 | <i>Escherichia coli</i>           | GCA_001021635.1_ASM102163v1_genomic.fna |
| 6988 | <i>Klebsiella pneumoniae</i>      | GCA_002180295.1_ASM218029v1_genomic.fna |
| 6989 | <i>Bordetella pertussis</i>       | GCA_001985965.1_ASM198596v1_genomic.fna |
| 6990 | <i>Bordetella pertussis</i>       | GCA_001985985.1_ASM198598v1_genomic.fna |
| 6991 | <i>Klebsiella pneumoniae</i>      | GCA_002180315.1_ASM218031v1_genomic.fna |
| 6992 | <i>Mycobacterium tuberculosis</i> | GCA_002448095.1_ASM244809v1_genomic.fna |
| 6993 | <i>Escherichia coli</i>           | GCA_001029125.1_ASM102912v1_genomic.fna |
| 6994 | <i>Listeria monocytogenes</i>     | GCA_002213925.1_ASM221392v1_genomic.fna |
| 6995 | <i>Staphylococcus aureus</i>      | GCA_002000585.1_ASM200058v1_genomic.fna |
| 6996 | <i>Salmonella enterica</i>        | GCA_000750215.1_ASM75021v1_genomic.fna  |
| 6997 | <i>Campylobacter jejuni</i>       | GCA_002234455.1_ASM223445v1_genomic.fna |
| 6998 | <i>Campylobacter jejuni</i>       | GCA_002238355.1_ASM223835v1_genomic.fna |
| 6999 | <i>Salmonella enterica</i>        | GCA_000750255.1_ASM75025v1_genomic.fna  |
| 7000 | <i>Staphylococcus aureus</i>      | GCA_002000605.1_ASM200060v1_genomic.fna |
| 7001 | <i>Listeria monocytogenes</i>     | GCA_002213945.1_ASM221394v1_genomic.fna |

|      |                                   |                                         |
|------|-----------------------------------|-----------------------------------------|
| 7002 | <i>Escherichia coli</i>           | GCA_001039415.1_ASM103941v1_genomic.fna |
| 7003 | <i>Mycobacterium tuberculosis</i> | GCA_002448115.1_ASM244811v1_genomic.fna |
| 7004 | <i>Klebsiella pneumoniae</i>      | GCA_002192315.1_ASM219231v1_genomic.fna |
| 7005 | <i>Bordetella pertussis</i>       | GCA_001986005.1_ASM198600v1_genomic.fna |
| 7006 | <i>Bordetella pertussis</i>       | GCA_001986025.1_ASM198602v1_genomic.fna |
| 7007 | <i>Klebsiella pneumoniae</i>      | GCA_002192335.1_ASM219233v1_genomic.fna |
| 7008 | <i>Mycobacterium tuberculosis</i> | GCA_002448135.1_ASM244813v1_genomic.fna |
| 7009 | <i>Escherichia coli</i>           | GCA_001043215.1_ASM104321v1_genomic.fna |
| 7010 | <i>Listeria monocytogenes</i>     | GCA_002213965.1_ASM221396v1_genomic.fna |
| 7011 | <i>Staphylococcus aureus</i>      | GCA_002000625.1_ASM200062v1_genomic.fna |
| 7012 | <i>Salmonella enterica</i>        | GCA_000750295.1_ASM75029v1_genomic.fna  |
| 7013 | <i>Campylobacter jejuni</i>       | GCA_002238375.1_ASM223837v1_genomic.fna |
| 7014 | <i>Campylobacter jejuni</i>       | GCA_002407125.1_ASM240712v1_genomic.fna |
| 7015 | <i>Salmonella enterica</i>        | GCA_000750335.1_ASM75033v1_genomic.fna  |
| 7016 | <i>Staphylococcus aureus</i>      | GCA_002000645.1_ASM200064v1_genomic.fna |
| 7017 | <i>Listeria monocytogenes</i>     | GCA_002213985.1_ASM221398v1_genomic.fna |
| 7018 | <i>Escherichia coli</i>           | GCA_001051135.1_ASM105113v1_genomic.fna |
| 7019 | <i>Mycobacterium tuberculosis</i> | GCA_002448155.1_ASM244815v1_genomic.fna |
| 7020 | <i>Klebsiella pneumoniae</i>      | GCA_002192375.1_ASM219237v1_genomic.fna |
| 7021 | <i>Bordetella pertussis</i>       | GCA_001986045.1_ASM198604v1_genomic.fna |
| 7022 | <i>Bordetella pertussis</i>       | GCA_001986065.1_ASM198606v1_genomic.fna |
| 7023 | <i>Klebsiella pneumoniae</i>      | GCA_002197225.1_ASM219722v1_genomic.fna |
| 7024 | <i>Mycobacterium tuberculosis</i> | GCA_002448175.1_ASM244817v1_genomic.fna |
| 7025 | <i>Escherichia coli</i>           | GCA_001183645.1_ASM118364v1_genomic.fna |
| 7026 | <i>Listeria monocytogenes</i>     | GCA_002214005.1_ASM221400v1_genomic.fna |
| 7027 | <i>Staphylococcus aureus</i>      | GCA_002000665.1_ASM200066v1_genomic.fna |
| 7028 | <i>Salmonella enterica</i>        | GCA_000750375.1_ASM75037v1_genomic.fna  |
| 7029 | <i>Campylobacter jejuni</i>       | GCA_002587105.1_ASM258710v1_genomic.fna |
| 7030 | <i>Campylobacter jejuni</i>       | GCA_002587225.1_ASM258722v1_genomic.fna |
| 7031 | <i>Salmonella enterica</i>        | GCA_000750395.2_ASM75039v2_genomic.fna  |
| 7032 | <i>Staphylococcus aureus</i>      | GCA_002000685.1_ASM200068v1_genomic.fna |
| 7033 | <i>Listeria monocytogenes</i>     | GCA_002214045.1_ASM221404v1_genomic.fna |
| 7034 | <i>Escherichia coli</i>           | GCA_001183665.1_ASM118366v1_genomic.fna |
| 7035 | <i>Mycobacterium tuberculosis</i> | GCA_002448195.1_ASM244819v1_genomic.fna |

|      |                                   |                                         |
|------|-----------------------------------|-----------------------------------------|
| 7036 | <i>Klebsiella pneumoniae</i>      | GCA_002197505.1_ASM219750v1_genomic.fna |
| 7037 | <i>Bordetella pertussis</i>       | GCA_001986085.1_ASM198608v1_genomic.fna |
| 7038 | <i>Bordetella pertussis</i>       | GCA_001986105.1_ASM198610v1_genomic.fna |
| 7039 | <i>Klebsiella pneumoniae</i>      | GCA_002202195.1_ASM220219v1_genomic.fna |
| 7040 | <i>Mycobacterium tuberculosis</i> | GCA_002448215.1_ASM244821v1_genomic.fna |
| 7041 | <i>Escherichia coli</i>           | GCA_001183685.1_ASM118368v1_genomic.fna |
| 7042 | <i>Listeria monocytogenes</i>     | GCA_002214065.1_ASM221406v1_genomic.fna |
| 7043 | <i>Staphylococcus aureus</i>      | GCA_002000705.1_ASM200070v1_genomic.fna |
| 7044 | <i>Salmonella enterica</i>        | GCA_000750415.2_ASM75041v2_genomic.fna  |
| 7045 | <i>Salmonella enterica</i>        | GCA_000750435.1_ASM75043v1_genomic.fna  |
| 7046 | <i>Staphylococcus aureus</i>      | GCA_002000725.1_ASM200072v1_genomic.fna |
| 7047 | <i>Listeria monocytogenes</i>     | GCA_002214085.1_ASM221408v1_genomic.fna |
| 7048 | <i>Escherichia coli</i>           | GCA_001276585.2_ASM127658v2_genomic.fna |
| 7049 | <i>Klebsiella pneumoniae</i>      | GCA_002202215.1_ASM220221v1_genomic.fna |
| 7050 | <i>Bordetella pertussis</i>       | GCA_001986155.1_ASM198615v1_genomic.fna |
| 7051 | <i>Bordetella pertussis</i>       | GCA_001986175.1_ASM198617v1_genomic.fna |
| 7052 | <i>Klebsiella pneumoniae</i>      | GCA_002202235.1_ASM220223v1_genomic.fna |
| 7053 | <i>Escherichia coli</i>           | GCA_001280325.1_ASM128032v1_genomic.fna |
| 7054 | <i>Listeria monocytogenes</i>     | GCA_002214105.1_ASM221410v1_genomic.fna |
| 7055 | <i>Staphylococcus aureus</i>      | GCA_002000745.1_ASM200074v1_genomic.fna |
| 7056 | <i>Salmonella enterica</i>        | GCA_000750455.1_ASM75045v1_genomic.fna  |
| 7057 | <i>Salmonella enterica</i>        | GCA_000750475.1_ASM75047v1_genomic.fna  |
| 7058 | <i>Staphylococcus aureus</i>      | GCA_002000765.1_ASM200076v1_genomic.fna |
| 7059 | <i>Listeria monocytogenes</i>     | GCA_002214125.1_ASM221412v1_genomic.fna |
| 7060 | <i>Escherichia coli</i>           | GCA_001280345.1_ASM128034v1_genomic.fna |
| 7061 | <i>Klebsiella pneumoniae</i>      | GCA_002202255.1_ASM220225v1_genomic.fna |
| 7062 | <i>Bordetella pertussis</i>       | GCA_001986195.1_ASM198619v1_genomic.fna |
| 7063 | <i>Bordetella pertussis</i>       | GCA_001986215.1_ASM198621v1_genomic.fna |
| 7064 | <i>Klebsiella pneumoniae</i>      | GCA_002202275.1_ASM220227v1_genomic.fna |
| 7065 | <i>Escherichia coli</i>           | GCA_001280385.1_ASM128038v1_genomic.fna |
| 7066 | <i>Listeria monocytogenes</i>     | GCA_002214145.1_ASM221414v1_genomic.fna |
| 7067 | <i>Staphylococcus aureus</i>      | GCA_002000785.1_ASM200078v1_genomic.fna |
| 7068 | <i>Salmonella enterica</i>        | GCA_000750495.1_ASM75049v1_genomic.fna  |
| 7069 | <i>Salmonella enterica</i>        | GCA_000754375.1_ASM75437v1_genomic.fna  |



|      |                               |                                         |
|------|-------------------------------|-----------------------------------------|
| 7070 | <i>Staphylococcus aureus</i>  | GCA_002000805.1_ASM200080v1_genomic.fna |
| 7071 | <i>Listeria monocytogenes</i> | GCA_002220325.1_ASM222032v1_genomic.fna |
| 7072 | <i>Escherichia coli</i>       | GCA_001280405.1_ASM128040v1_genomic.fna |
| 7073 | <i>Klebsiella pneumoniae</i>  | GCA_002209405.1_ASM220940v1_genomic.fna |
| 7074 | <i>Bordetella pertussis</i>   | GCA_001986235.1_ASM198623v1_genomic.fna |
| 7075 | <i>Bordetella pertussis</i>   | GCA_001986255.1_ASM198625v1_genomic.fna |
| 7076 | <i>Klebsiella pneumoniae</i>  | GCA_002211905.1_ASM221190v1_genomic.fna |
| 7077 | <i>Escherichia coli</i>       | GCA_001307215.1_ASM130721v1_genomic.fna |
| 7078 | <i>Listeria monocytogenes</i> | GCA_002285655.1_ASM228565v1_genomic.fna |
| 7079 | <i>Staphylococcus aureus</i>  | GCA_002000825.1_ASM200082v1_genomic.fna |
| 7080 | <i>Salmonella enterica</i>    | GCA_000756465.1_ASM75646v1_genomic.fna  |
| 7081 | <i>Salmonella enterica</i>    | GCA_000818075.1_ASM81807v1_genomic.fna  |
| 7082 | <i>Staphylococcus aureus</i>  | GCA_002000845.1_ASM200084v1_genomic.fna |
| 7083 | <i>Listeria monocytogenes</i> | GCA_002285835.1_ASM228583v1_genomic.fna |
| 7084 | <i>Escherichia coli</i>       | GCA_001308065.1_ASM130806v1_genomic.fna |
| 7085 | <i>Klebsiella pneumoniae</i>  | GCA_002243445.1_ASM224344v1_genomic.fna |
| 7086 | <i>Bordetella pertussis</i>   | GCA_001986275.1_ASM198627v1_genomic.fna |
| 7087 | <i>Bordetella pertussis</i>   | GCA_001986295.1_ASM198629v1_genomic.fna |
| 7088 | <i>Klebsiella pneumoniae</i>  | GCA_002249975.1_ASM224997v1_genomic.fna |
| 7089 | <i>Haemophilus influenzae</i> | GCA_000016465.1_ASM1646v1_genomic.fna   |
| 7090 | <i>Listeria monocytogenes</i> | GCA_002557735.1_ASM255773v1_genomic.fna |
| 7091 | <i>Escherichia coli</i>       | GCA_001308125.1_ASM130812v1_genomic.fna |
| 7092 | <i>Staphylococcus aureus</i>  | GCA_002000865.1_ASM200086v1_genomic.fna |
| 7093 | <i>Salmonella enterica</i>    | GCA_000818115.1_ASM81811v1_genomic.fna  |
| 7094 | <i>Salmonella enterica</i>    | GCA_000828595.1_ASM82859v1_genomic.fna  |
| 7095 | <i>Staphylococcus aureus</i>  | GCA_002025125.1_ASM202512v1_genomic.fna |
| 7096 | <i>Escherichia coli</i>       | GCA_001308165.1_ASM130816v1_genomic.fna |
| 7097 | <i>Listeria monocytogenes</i> | GCA_002557815.1_ASM255781v1_genomic.fna |
| 7098 | <i>Haemophilus influenzae</i> | GCA_000016485.1_ASM1648v1_genomic.fna   |
| 7099 | <i>Xanthomonas oryzae</i>     | GCA_000007385.1_ASM738v1_genomic.fna    |
| 7100 | <i>Klebsiella pneumoniae</i>  | GCA_002269295.1_ASM226929v1_genomic.fna |
| 7101 | <i>Bordetella pertussis</i>   | GCA_001986315.1_ASM198631v1_genomic.fna |
| 7102 | <i>Bordetella pertussis</i>   | GCA_001986335.1_ASM198633v1_genomic.fna |
| 7103 | <i>Klebsiella pneumoniae</i>  | GCA_002278055.1_ASM227805v1_genomic.fna |

|      |                               |                                         |
|------|-------------------------------|-----------------------------------------|
| 7104 | <i>Listeria monocytogenes</i> | GCA_900187225.1_51881_G01_genomic.fna   |
| 7105 | <i>Escherichia coli</i>       | GCA_001420935.1_ASM142093v1_genomic.fna |
| 7106 | <i>Staphylococcus aureus</i>  | GCA_002025145.1_ASM202514v1_genomic.fna |
| 7107 | <i>Salmonella enterica</i>    | GCA_000940895.2_ASM94089v2_genomic.fna  |
| 7108 | <i>Salmonella enterica</i>    | GCA_000940935.1_ASM94093v1_genomic.fna  |
| 7109 | <i>Staphylococcus aureus</i>  | GCA_002085525.1_ASM208552v1_genomic.fna |
| 7110 | <i>Escherichia coli</i>       | GCA_001420955.1_ASM142095v1_genomic.fna |
| 7111 | <i>Klebsiella pneumoniae</i>  | GCA_002307335.1_ASM230733v1_genomic.fna |
| 7112 | <i>Bordetella pertussis</i>   | GCA_001986355.1_ASM198635v1_genomic.fna |
| 7113 | <i>Bordetella pertussis</i>   | GCA_001986375.1_ASM198637v1_genomic.fna |
| 7114 | <i>Klebsiella pneumoniae</i>  | GCA_002386225.1_ASM238622v1_genomic.fna |
| 7115 | <i>Escherichia coli</i>       | GCA_001442495.1_ASM144249v1_genomic.fna |
| 7116 | <i>Staphylococcus aureus</i>  | GCA_002088995.1_ASM208899v1_genomic.fna |
| 7117 | <i>Salmonella enterica</i>    | GCA_000940975.1_ASM94097v1_genomic.fna  |
| 7118 | <i>Salmonella enterica</i>    | GCA_000941015.2_ASM94101v2_genomic.fna  |
| 7119 | <i>Staphylococcus aureus</i>  | GCA_002089035.1_ASM208903v1_genomic.fna |
| 7120 | <i>Escherichia coli</i>       | GCA_001455385.1_ASM145538v1_genomic.fna |
| 7121 | <i>Klebsiella pneumoniae</i>  | GCA_002587165.1_ASM258716v1_genomic.fna |
| 7122 | <i>Bordetella pertussis</i>   | GCA_001986415.1_ASM198641v1_genomic.fna |
| 7123 | <i>Bordetella pertussis</i>   | GCA_001986435.1_ASM198643v1_genomic.fna |
| 7124 | <i>Klebsiella pneumoniae</i>  | GCA_002587885.1_ASM258788v1_genomic.fna |
| 7125 | <i>Escherichia coli</i>       | GCA_001469815.1_ASM146981v1_genomic.fna |
| 7126 | <i>Staphylococcus aureus</i>  | GCA_002089055.1_ASM208905v1_genomic.fna |
| 7127 | <i>Salmonella enterica</i>    | GCA_000953495.1_SINFA_genomic.fna       |
| 7128 | <i>Salmonella enterica</i>    | GCA_000963535.2_ASM96353v2_genomic.fna  |
| 7129 | <i>Staphylococcus aureus</i>  | GCA_002089075.1_ASM208907v1_genomic.fna |
| 7130 | <i>Escherichia coli</i>       | GCA_001485455.1_ASM148545v1_genomic.fna |
| 7131 | <i>Klebsiella pneumoniae</i>  | GCA_002591075.1_ASM259107v1_genomic.fna |
| 7132 | <i>Bordetella pertussis</i>   | GCA_001986455.1_ASM198645v1_genomic.fna |
| 7133 | <i>Bordetella pertussis</i>   | GCA_001986475.1_ASM198647v1_genomic.fna |
| 7134 | <i>Escherichia coli</i>       | GCA_001513615.1_ASM151361v1_genomic.fna |
| 7135 | <i>Staphylococcus aureus</i>  | GCA_002089095.1_ASM208909v1_genomic.fna |
| 7136 | <i>Salmonella enterica</i>    | GCA_000973645.1_ASM97364v1_genomic.fna  |
| 7137 | <i>Salmonella enterica</i>    | GCA_000973665.2_ASM97366v2_genomic.fna  |

|      |                              |                                           |
|------|------------------------------|-------------------------------------------|
| 7138 | <i>Staphylococcus aureus</i> | GCA_002089115.1_ASM208911v1_genomic.fna   |
| 7139 | <i>Escherichia coli</i>      | GCA_001513635.1_ASM151363v1_genomic.fna   |
| 7140 | <i>Bordetella pertussis</i>  | GCA_001986495.1_ASM198649v1_genomic.fna   |
| 7141 | <i>Bordetella pertussis</i>  | GCA_001986515.1_ASM198651v1_genomic.fna   |
| 7142 | <i>Escherichia coli</i>      | GCA_001515725.1_ASM151572v1_genomic.fna   |
| 7143 | <i>Staphylococcus aureus</i> | GCA_002097595.1_ASM209759v1_genomic.fna   |
| 7144 | <i>Salmonella enterica</i>   | GCA_000973685.1_ASM97368v1_genomic.fna    |
| 7145 | <i>Salmonella enterica</i>   | GCA_000988525.3_ASM98852v3_genomic.fna    |
| 7146 | <i>Staphylococcus aureus</i> | GCA_002140115.1_ASM214011v1_genomic.fna   |
| 7147 | <i>Escherichia coli</i>      | GCA_001542675.2_ASM154267v2_genomic.fna   |
| 7148 | <i>Bordetella pertussis</i>  | GCA_001986535.1_ASM198653v1_genomic.fna   |
| 7149 | <i>Bordetella pertussis</i>  | GCA_001986555.1_ASM198655v1_genomic.fna   |
| 7150 | <i>Escherichia coli</i>      | GCA_001544635.1_ASM154463v1_genomic.fna   |
| 7151 | <i>Staphylococcus aureus</i> | GCA_002202075.1_ASM220207v1_genomic.fna   |
| 7152 | <i>Salmonella enterica</i>   | GCA_000993725.1_ASM99372v1_genomic.fna    |
| 7153 | <i>Salmonella enterica</i>   | GCA_001006525.1_ASM100652v1_genomic.fna   |
| 7154 | <i>Staphylococcus aureus</i> | GCA_002202095.1_ASM220209v1_genomic.fna   |
| 7155 | <i>Escherichia coli</i>      | GCA_001558995.2_ASM155899v2_genomic.fna   |
| 7156 | <i>Bordetella pertussis</i>  | GCA_001986575.1_ASM198657v1_genomic.fna   |
| 7157 | <i>Bordetella pertussis</i>  | GCA_001986595.1_ASM198659v1_genomic.fna   |
| 7158 | <i>Escherichia coli</i>      | GCA_001559615.2_ASM155961v2_genomic.fna   |
| 7159 | <i>Staphylococcus aureus</i> | GCA_002204555.1_ASM220455v1_genomic.fna   |
| 7160 | <i>Salmonella enterica</i>   | GCA_001048035.2_ERL103914_genomic.fna     |
| 7161 | <i>Salmonella enterica</i>   | GCA_001048375.2_M223_genomic.fna          |
| 7162 | <i>Staphylococcus aureus</i> | GCA_002204575.1_ASM220457v1_genomic.fna   |
| 7163 | <i>Escherichia coli</i>      | GCA_001559635.1_ASM155963v1_genomic.fna   |
| 7164 | <i>Bordetella pertussis</i>  | GCA_001986615.1_ASM198661v1_genomic.fna   |
| 7165 | <i>Bordetella pertussis</i>  | GCA_001986635.1_ASM198663v1_genomic.fna   |
| 7166 | <i>Escherichia coli</i>      | GCA_001559655.1_ASM155965v1_genomic.fna   |
| 7167 | <i>Staphylococcus aureus</i> | GCA_002209325.1_ASM220932v1_genomic.fna   |
| 7168 | <i>Salmonella enterica</i>   | GCA_001079465.2_STyphi_1553_1_genomic.fna |
| 7169 | <i>Salmonella enterica</i>   | GCA_001088345.2_052042_2_genomic.fna      |
| 7170 | <i>Staphylococcus aureus</i> | GCA_002214665.1_ASM221466v1_genomic.fna   |
| 7171 | <i>Escherichia coli</i>      | GCA_001559675.1_ASM155967v1_genomic.fna   |

|      |                                    |                                              |
|------|------------------------------------|----------------------------------------------|
| 7172 | <i>Bacillus subtilis</i>           | GCA_001596535.1_ASM159653v1_genomic.fna      |
| 7173 | <i>Bordetella pertussis</i>        | GCA_001986655.1_ASM198665v1_genomic.fna      |
| 7174 | <i>Bordetella pertussis</i>        | GCA_001986675.1_ASM198667v1_genomic.fna      |
| 7175 | <i>Escherichia coli</i>            | GCA_001566335.1_ASM156633v1_genomic.fna      |
| 7176 | <i>Staphylococcus aureus</i>       | GCA_002310395.1_ASM231039v1_genomic.fna      |
| 7177 | <i>Salmonella enterica</i>         | GCA_001095585.2_ERL114000_genomic.fna        |
| 7178 | <i>Salmonella enterica</i>         | GCA_001104165.2_E00-7866_genomic.fna         |
| 7179 | <i>Staphylococcus aureus</i>       | GCA_002310435.1_ASM231043v1_genomic.fna      |
| 7180 | <i>Escherichia coli</i>            | GCA_001566615.1_ASM156661v1_genomic.fna      |
| 7181 | <i>Bordetella pertussis</i>        | GCA_001986695.1_ASM198669v1_genomic.fna      |
| 7182 | <i>Bordetella pertussis</i>        | GCA_001986715.1_ASM198671v1_genomic.fna      |
| 7183 | <i>Escherichia coli</i>            | GCA_001566635.1_ASM156663v1_genomic.fna      |
| 7184 | <i>Staphylococcus aureus</i>       | GCA_002355355.1_ASM235535v1_genomic.fna      |
| 7185 | <i>Salmonella enterica</i>         | GCA_001104885.3_10349_1_89_2_genomic.fna     |
| 7186 | <i>Salmonella enterica</i>         | GCA_001106745.2_UI_2120_genomic.fna          |
| 7187 | <i>Staphylococcus aureus</i>       | GCA_002356675.1_ASM235667v1_genomic.fna      |
| 7188 | <i>Escherichia coli</i>            | GCA_001566655.1_ASM156665v1_genomic.fna      |
| 7189 | <i>Bordetella pertussis</i>        | GCA_001986735.1_ASM198673v1_genomic.fna      |
| 7190 | <i>Bordetella pertussis</i>        | GCA_001986755.1_ASM198675v1_genomic.fna      |
| 7191 | <i>Escherichia coli</i>            | GCA_001566675.1_ASM156667v1_genomic.fna      |
| 7192 | <i>Staphylococcus aureus</i>       | GCA_002386245.1_ASM238624v1_genomic.fna      |
| 7193 | <i>Salmonella enterica</i>         | GCA_001118185.2_H12ESR00394-001A_genomic.fna |
| 7194 | <i>Salmonella enterica</i>         | GCA_001119245.2_76_1292_genomic.fna          |
| 7195 | <i>Staphylococcus aureus</i>       | GCA_002442975.1_ASM244297v1_genomic.fna      |
| 7196 | <i>Escherichia coli</i>            | GCA_001577325.1_ASM157732v1_genomic.fna      |
| 7197 | <i>Bordetella pertussis</i>        | GCA_001986775.1_ASM198677v1_genomic.fna      |
| 7198 | <i>Staphylococcus haemolyticus</i> | GCA_000972725.1_ASM97272v1_genomic.fna       |
| 7199 | <i>Bordetella pertussis</i>        | GCA_001986795.1_ASM198679v1_genomic.fna      |
| 7200 | <i>Escherichia coli</i>            | GCA_001593565.1_ASM159356v1_genomic.fna      |
| 7201 | <i>Staphylococcus aureus</i>       | GCA_002633765.1_ASM263376v1_genomic.fna      |
| 7202 | <i>Salmonella enterica</i>         | GCA_001121865.2_404Ty_genomic.fna            |
| 7203 | <i>Salmonella enterica</i>         | GCA_001127485.2_ERL041834_genomic.fna        |
| 7204 | <i>Staphylococcus aureus</i>       | GCA_002633785.1_ASM263378v1_genomic.fna      |
| 7205 | <i>Escherichia coli</i>            | GCA_001610755.1_ASM161075v1_genomic.fna      |

|      |                              |                                              |
|------|------------------------------|----------------------------------------------|
| 7206 | <i>Bordetella pertussis</i>  | GCA_001986815.1_ASM198681v1_genomic.fna      |
| 7207 | <i>Bordetella pertussis</i>  | GCA_001986835.1_ASM198683v1_genomic.fna      |
| 7208 | <i>Escherichia coli</i>      | GCA_001612475.1_ASM161247v1_genomic.fna      |
| 7209 | <i>Staphylococcus aureus</i> | GCA_002633805.1_ASM263380v1_genomic.fna      |
| 7210 | <i>Salmonella enterica</i>   | GCA_001135805.2_ERL072973_genomic.fna        |
| 7211 | <i>Salmonella enterica</i>   | GCA_001148125.2_ERL024120_genomic.fna        |
| 7212 | <i>Staphylococcus aureus</i> | GCA_002633825.1_ASM263382v1_genomic.fna      |
| 7213 | <i>Escherichia coli</i>      | GCA_001612495.1_ASM161249v1_genomic.fna      |
| 7214 | <i>Bordetella pertussis</i>  | GCA_001986855.1_ASM198685v1_genomic.fna      |
| 7215 | <i>Bordetella pertussis</i>  | GCA_001986875.1_ASM198687v1_genomic.fna      |
| 7216 | <i>Escherichia coli</i>      | GCA_001617565.1_ASM161756v1_genomic.fna      |
| 7217 | <i>Staphylococcus aureus</i> | GCA_002633845.1_ASM263384v1_genomic.fna      |
| 7218 | <i>Salmonella enterica</i>   | GCA_001148305.2_ERL082356_genomic.fna        |
| 7219 | <i>Salmonella enterica</i>   | GCA_001157245.2_ERL12148_genomic.fna         |
| 7220 | <i>Staphylococcus aureus</i> | GCA_002633865.1_ASM263386v1_genomic.fna      |
| 7221 | <i>Escherichia coli</i>      | GCA_001618325.1_ASM161832v1_genomic.fna      |
| 7222 | <i>Bordetella pertussis</i>  | GCA_001986895.1_ASM198689v1_genomic.fna      |
| 7223 | <i>Bordetella pertussis</i>  | GCA_001986915.1_ASM198691v1_genomic.fna      |
| 7224 | <i>Escherichia coli</i>      | GCA_001618345.2_ASM161834v2_genomic.fna      |
| 7225 | <i>Salmonella enterica</i>   | GCA_001163025.2_H12ESR04734-001A_genomic.fna |
| 7226 | <i>Staphylococcus aureus</i> | GCA_900004855.1_BB155_genomic.fna            |
| 7227 | <i>Staphylococcus aureus</i> | GCA_900017775.1_NZAK3_genomic.fna            |
| 7228 | <i>Salmonella enterica</i>   | GCA_001165785.2_ERL024919_genomic.fna        |
| 7229 | <i>Escherichia coli</i>      | GCA_001618365.1_ASM161836v1_genomic.fna      |
| 7230 | <i>Bordetella pertussis</i>  | GCA_001986935.1_ASM198693v1_genomic.fna      |
| 7231 | <i>Bordetella pertussis</i>  | GCA_001986955.1_ASM198695v1_genomic.fna      |
| 7232 | <i>Escherichia coli</i>      | GCA_001644725.1_ASM164472v1_genomic.fna      |
| 7233 | <i>Staphylococcus aureus</i> | GCA_900092595.1_Sa_Newman_UoM_genomic.fna    |
| 7234 | <i>Salmonella enterica</i>   | GCA_001185215.1_ASM118521v1_genomic.fna      |
| 7235 | <i>Salmonella enterica</i>   | GCA_001185245.1_ASM118524v1_genomic.fna      |
| 7236 | <i>Staphylococcus aureus</i> | GCA_900096745.1_AUS0325_genomic.fna          |
| 7237 | <i>Escherichia coli</i>      | GCA_001644745.1_ASM164474v1_genomic.fna      |
| 7238 | <i>Bordetella pertussis</i>  | GCA_001986975.1_ASM198697v1_genomic.fna      |
| 7239 | <i>Bordetella pertussis</i>  | GCA_001986995.1_ASM198699v1_genomic.fna      |

|      |                              |                                                 |
|------|------------------------------|-------------------------------------------------|
| 7240 | <i>Escherichia coli</i>      | GCA_001650275.1_ASM165027v1_genomic.fna         |
| 7241 | <i>Staphylococcus aureus</i> | GCA_900129335.1_PP_HGAG_QV30_2SC_T4_genomic.fna |
| 7242 | <i>Salmonella enterica</i>   | GCA_001240865.2_Ty3_193_genomic.fna             |
| 7243 | <i>Salmonella enterica</i>   | GCA_001278315.1_ASM127831v1_genomic.fna         |
| 7244 | <i>Escherichia coli</i>      | GCA_001650295.1_ASM165029v1_genomic.fna         |
| 7245 | <i>Bordetella pertussis</i>  | GCA_001987015.1_ASM198701v1_genomic.fna         |
| 7246 | <i>Bordetella pertussis</i>  | GCA_001987035.1_ASM198703v1_genomic.fna         |
| 7247 | <i>Escherichia coli</i>      | GCA_001651925.2_ASM165192v2_genomic.fna         |
| 7248 | <i>Salmonella enterica</i>   | GCA_001293505.1_ASM129350v1_genomic.fna         |
| 7249 | <i>Salmonella enterica</i>   | GCA_001302605.1_ASM130260v1_genomic.fna         |
| 7250 | <i>Escherichia coli</i>      | GCA_001651945.1_ASM165194v1_genomic.fna         |
| 7251 | <i>Bordetella pertussis</i>  | GCA_001987055.1_ASM198705v1_genomic.fna         |
| 7252 | <i>Bordetella pertussis</i>  | GCA_001987075.1_ASM198707v1_genomic.fna         |
| 7253 | <i>Shigella flexneri</i>     | GCA_001579965.1_ASM157996v1_genomic.fna         |
| 7254 | <i>Escherichia coli</i>      | GCA_001651965.2_ASM165196v2_genomic.fna         |
| 7255 | <i>Salmonella enterica</i>   | GCA_001305235.1_ASM130523v1_genomic.fna         |
| 7256 | <i>Salmonella enterica</i>   | GCA_001305815.1_ASM130581v1_genomic.fna         |
| 7257 | <i>Escherichia coli</i>      | GCA_001660565.1_ASM166056v1_genomic.fna         |
| 7258 | <i>Bordetella pertussis</i>  | GCA_001987095.1_ASM198709v1_genomic.fna         |
| 7259 | <i>Bordetella pertussis</i>  | GCA_001987115.1_ASM198711v1_genomic.fna         |
| 7260 | <i>Escherichia coli</i>      | GCA_001660585.1_ASM166058v1_genomic.fna         |
| 7261 | <i>Salmonella enterica</i>   | GCA_001305835.1_ASM130583v1_genomic.fna         |
| 7262 | <i>Salmonella enterica</i>   | GCA_001356455.2_1016889_genomic.fna             |
| 7263 | <i>Escherichia coli</i>      | GCA_001663075.1_ASM166307v1_genomic.fna         |
| 7264 | <i>Bordetella pertussis</i>  | GCA_001987135.1_ASM198713v1_genomic.fna         |
| 7265 | <i>Bordetella pertussis</i>  | GCA_001987155.1_ASM198715v1_genomic.fna         |
| 7266 | <i>Escherichia coli</i>      | GCA_001663475.1_ASM166347v1_genomic.fna         |
| 7267 | <i>Salmonella enterica</i>   | GCA_001357935.2_80_2002_genomic.fna             |
| 7268 | <i>Salmonella enterica</i>   | GCA_001359015.2_129_0238_genomic.fna            |
| 7269 | <i>Escherichia coli</i>      | GCA_001675145.1_ASM167514v1_genomic.fna         |
| 7270 | <i>Bordetella pertussis</i>  | GCA_001987175.1_ASM198717v1_genomic.fna         |
| 7271 | <i>Bordetella pertussis</i>  | GCA_001987195.1_ASM198719v1_genomic.fna         |
| 7272 | <i>Escherichia coli</i>      | GCA_001677475.1_ASM167747v1_genomic.fna         |
| 7273 | <i>Salmonella enterica</i>   | GCA_001360555.2_2010_7898_genomic.fna           |

|      |                       |                                              |
|------|-----------------------|----------------------------------------------|
| 7274 | Salmonella enterica   | GCA_001361075.2_Ty585_genomic.fna            |
| 7275 | Escherichia coli      | GCA_001677495.1_ASM167749v1_genomic.fna      |
| 7276 | Bordetella pertussis  | GCA_001987215.1_ASM198721v1_genomic.fna      |
| 7277 | Bordetella pertussis  | GCA_001987235.1_ASM198723v1_genomic.fna      |
| 7278 | Escherichia coli      | GCA_001677515.1_ASM167751v1_genomic.fna      |
| 7279 | Salmonella enterica   | GCA_001362095.2_034151_4_genomic.fna         |
| 7280 | Salmonella enterica   | GCA_001362135.2_11909_3_genomic.fna          |
| 7281 | Escherichia coli      | GCA_001678925.1_ASM167892v1_genomic.fna      |
| 7282 | Bordetella pertussis  | GCA_001987255.1_ASM198725v1_genomic.fna      |
| 7283 | Bordetella pertussis  | GCA_001987275.1_ASM198727v1_genomic.fna      |
| 7284 | Escherichia coli      | GCA_001678965.1_ASM167896v1_genomic.fna      |
| 7285 | Salmonella enterica   | GCA_001362175.2_ERL12960_genomic.fna         |
| 7286 | Salmonella enterica   | GCA_001362195.2_H12ESR00755-001A_genomic.fna |
| 7287 | Escherichia coli      | GCA_001679985.1_ASM167998v1_genomic.fna      |
| 7288 | Bordetella pertussis  | GCA_001987295.1_ASM198729v1_genomic.fna      |
| 7289 | Bordetella pertussis  | GCA_001987315.1_ASM198731v1_genomic.fna      |
| 7290 | Escherichia coli      | GCA_001682305.2_ASM168230v2_genomic.fna      |
| 7291 | Salmonella enterica   | GCA_001362335.2_Ty2_genomic.fna              |
| 7292 | Salmonella enterica   | GCA_001364695.2_Ty3_243_genomic.fna          |
| 7293 | Escherichia coli      | GCA_001683435.1_ASM168343v1_genomic.fna      |
| 7294 | Bordetella pertussis  | GCA_001987335.1_ASM198733v1_genomic.fna      |
| 7295 | Bordetella pertussis  | GCA_001987355.1_ASM198735v1_genomic.fna      |
| 7296 | Clostridium botulinum | GCA_000816945.1_ASM81694v1_genomic.fna       |
| 7297 | Escherichia coli      | GCA_001693315.1_ASM169331v1_genomic.fna      |
| 7298 | Salmonella enterica   | GCA_001409135.1_10259_genomic.fna            |
| 7299 | Salmonella enterica   | GCA_001409155.1_98_11262_genomic.fna         |
| 7300 | Escherichia coli      | GCA_001693635.1_ASM169363v1_genomic.fna      |
| 7301 | Bordetella pertussis  | GCA_001987375.1_ASM198737v1_genomic.fna      |
| 7302 | Bordetella pertussis  | GCA_001987395.1_ASM198739v1_genomic.fna      |
| 7303 | Escherichia coli      | GCA_001695515.1_ASM169551v1_genomic.fna      |
| 7304 | Salmonella enterica   | GCA_001409175.1_99_3134_genomic.fna          |
| 7305 | Salmonella enterica   | GCA_001409195.1_C2346_genomic.fna            |
| 7306 | Escherichia coli      | GCA_001721125.1_ASM172112v1_genomic.fna      |
| 7307 | Bordetella pertussis  | GCA_001987415.1_ASM198741v1_genomic.fna      |

|      |                             |                                         |
|------|-----------------------------|-----------------------------------------|
| 7308 | <i>Bordetella pertussis</i> | GCA_001987435.1_ASM198743v1_genomic.fna |
| 7309 | <i>Escherichia coli</i>     | GCA_001721205.1_ASM172120v1_genomic.fna |
| 7310 | <i>Salmonella enterica</i>  | GCA_001441205.1_ASM144120v1_genomic.fna |
| 7311 | <i>Salmonella enterica</i>  | GCA_001441225.1_ASM144122v1_genomic.fna |
| 7312 | <i>Escherichia coli</i>     | GCA_001721225.1_ASM172122v1_genomic.fna |
| 7313 | <i>Bordetella pertussis</i> | GCA_001987455.1_ASM198745v1_genomic.fna |
| 7314 | <i>Bordetella pertussis</i> | GCA_001987475.1_ASM198747v1_genomic.fna |
| 7315 | <i>Escherichia coli</i>     | GCA_001721525.1_ASM172152v1_genomic.fna |
| 7316 | <i>Salmonella enterica</i>  | GCA_001441245.1_ASM144124v1_genomic.fna |
| 7317 | <i>Salmonella enterica</i>  | GCA_001447095.1_ASM144709v1_genomic.fna |
| 7318 | <i>Escherichia coli</i>     | GCA_001723505.1_ASM172350v1_genomic.fna |
| 7319 | <i>Bordetella pertussis</i> | GCA_001987495.1_ASM198749v1_genomic.fna |
| 7320 | <i>Bordetella pertussis</i> | GCA_001987515.1_ASM198751v1_genomic.fna |
| 7321 | <i>Escherichia coli</i>     | GCA_001735705.1_ASM173570v1_genomic.fna |
| 7322 | <i>Salmonella enterica</i>  | GCA_001447115.1_ASM144711v1_genomic.fna |
| 7323 | <i>Salmonella enterica</i>  | GCA_001454965.1_ASM145496v1_genomic.fna |
| 7324 | <i>Escherichia coli</i>     | GCA_001750845.1_ASM175084v1_genomic.fna |
| 7325 | <i>Bacillus anthracis</i>   | GCA_000512775.1_ASM51277v1_genomic.fna  |
| 7326 | <i>Bordetella pertussis</i> | GCA_001987535.1_ASM198753v1_genomic.fna |
| 7327 | <i>Bordetella pertussis</i> | GCA_001987555.1_ASM198755v1_genomic.fna |
| 7328 | <i>Bacillus anthracis</i>   | GCA_000747335.1_ASM74733v1_genomic.fna  |
| 7329 | <i>Escherichia coli</i>     | GCA_001753445.1_ASM175344v1_genomic.fna |
| 7330 | <i>Salmonella enterica</i>  | GCA_001457675.1_NCTC10384_genomic.fna   |
| 7331 | <i>Salmonella enterica</i>  | GCA_001484025.1_ASM148402v1_genomic.fna |
| 7332 | <i>Escherichia coli</i>     | GCA_001753465.1_ASM175346v1_genomic.fna |
| 7333 | <i>Bacillus anthracis</i>   | GCA_000747375.1_ASM74737v1_genomic.fna  |
| 7334 | <i>Bordetella pertussis</i> | GCA_001987575.1_ASM198757v1_genomic.fna |
| 7335 | <i>Bordetella pertussis</i> | GCA_001987595.1_ASM198759v1_genomic.fna |
| 7336 | <i>Bacillus anthracis</i>   | GCA_002208785.1_ASM220878v1_genomic.fna |
| 7337 | <i>Escherichia coli</i>     | GCA_001753485.1_ASM175348v1_genomic.fna |
| 7338 | <i>Salmonella enterica</i>  | GCA_001535315.2_ASM153531v2_genomic.fna |
| 7339 | <i>Salmonella enterica</i>  | GCA_001540845.1_SO4698_09_genomic.fna   |
| 7340 | <i>Escherichia coli</i>     | GCA_001753505.1_ASM175350v1_genomic.fna |
| 7341 | <i>Bordetella pertussis</i> | GCA_001987615.1_ASM198761v1_genomic.fna |



|      |                             |                                         |
|------|-----------------------------|-----------------------------------------|
| 7342 | <i>Bordetella pertussis</i> | GCA_001987635.1_ASM198763v1_genomic.fna |
| 7343 | <i>Escherichia coli</i>     | GCA_001753525.1_ASM175352v1_genomic.fna |
| 7344 | <i>Salmonella enterica</i>  | GCA_001558355.1_ASM155835v1_genomic.fna |
| 7345 | <i>Salmonella enterica</i>  | GCA_001576255.1_ASM157625v1_genomic.fna |
| 7346 | <i>Escherichia coli</i>     | GCA_001753545.1_ASM175354v1_genomic.fna |
| 7347 | <i>Bordetella pertussis</i> | GCA_001987655.1_ASM198765v1_genomic.fna |
| 7348 | <i>Bordetella pertussis</i> | GCA_001987675.1_ASM198767v1_genomic.fna |
| 7349 | <i>Escherichia coli</i>     | GCA_001753565.1_ASM175356v1_genomic.fna |
| 7350 | <i>Salmonella enterica</i>  | GCA_001576275.1_ASM157627v1_genomic.fna |
| 7351 | <i>Salmonella enterica</i>  | GCA_001577505.1_ASM157750v1_genomic.fna |
| 7352 | <i>Escherichia coli</i>     | GCA_001806265.1_ASM180626v1_genomic.fna |
| 7353 | <i>Bordetella pertussis</i> | GCA_001987695.1_ASM198769v1_genomic.fna |
| 7354 | <i>Bordetella pertussis</i> | GCA_001987715.1_ASM198771v1_genomic.fna |
| 7355 | <i>Escherichia coli</i>     | GCA_001806285.1_ASM180628v1_genomic.fna |
| 7356 | <i>Salmonella enterica</i>  | GCA_001612515.1_ASM161251v1_genomic.fna |
| 7357 | <i>Salmonella enterica</i>  | GCA_001617585.1_ASM161758v1_genomic.fna |
| 7358 | <i>Escherichia coli</i>     | GCA_001860505.1_ASM186050v1_genomic.fna |
| 7359 | <i>Bordetella pertussis</i> | GCA_001987735.1_ASM198773v1_genomic.fna |
| 7360 | <i>Bordetella pertussis</i> | GCA_001987755.1_ASM198775v1_genomic.fna |
| 7361 | <i>Escherichia coli</i>     | GCA_001865295.1_ASM186529v1_genomic.fna |
| 7362 | <i>Salmonella enterica</i>  | GCA_001620115.1_ASM162011v1_genomic.fna |
| 7363 | <i>Salmonella enterica</i>  | GCA_001620135.2_ASM162013v2_genomic.fna |
| 7364 | <i>Escherichia coli</i>     | GCA_001874485.1_ASM187448v1_genomic.fna |
| 7365 | <i>Bordetella pertussis</i> | GCA_001987775.1_ASM198777v1_genomic.fna |
| 7366 | <i>Bordetella pertussis</i> | GCA_001987795.1_ASM198779v1_genomic.fna |
| 7367 | <i>Escherichia coli</i>     | GCA_001886535.1_ASM188653v1_genomic.fna |
| 7368 | <i>Salmonella enterica</i>  | GCA_001620155.1_ASM162015v1_genomic.fna |
| 7369 | <i>Salmonella enterica</i>  | GCA_001620205.2_ASM162020v2_genomic.fna |
| 7370 | <i>Escherichia coli</i>     | GCA_001886555.1_ASM188655v1_genomic.fna |
| 7371 | <i>Bordetella pertussis</i> | GCA_001987815.1_ASM198781v1_genomic.fna |
| 7372 | <i>Bordetella pertussis</i> | GCA_001987835.1_ASM198783v1_genomic.fna |
| 7373 | <i>Escherichia coli</i>     | GCA_001886575.1_ASM188657v1_genomic.fna |
| 7374 | <i>Salmonella enterica</i>  | GCA_001620225.1_ASM162022v1_genomic.fna |
| 7375 | <i>Salmonella enterica</i>  | GCA_001623545.2_ASM162354v2_genomic.fna |

|      |                      |                                         |
|------|----------------------|-----------------------------------------|
| 7376 | Escherichia coli     | GCA_001886755.1_ASM188675v1_genomic.fna |
| 7377 | Bordetella pertussis | GCA_001987855.1_ASM198785v1_genomic.fna |
| 7378 | Bordetella pertussis | GCA_001987875.1_ASM198787v1_genomic.fna |
| 7379 | Escherichia coli     | GCA_001886895.1_ASM188689v1_genomic.fna |
| 7380 | Salmonella enterica  | GCA_001623585.1_ASM162358v1_genomic.fna |
| 7381 | Salmonella enterica  | GCA_001623625.1_ASM162362v1_genomic.fna |
| 7382 | Escherichia coli     | GCA_001886935.1_ASM188693v1_genomic.fna |
| 7383 | Bordetella pertussis | GCA_001987895.1_ASM198789v1_genomic.fna |
| 7384 | Bordetella pertussis | GCA_001987915.1_ASM198791v1_genomic.fna |
| 7385 | Escherichia coli     | GCA_001888075.1_ASM188807v1_genomic.fna |
| 7386 | Salmonella enterica  | GCA_001623645.1_ASM162364v1_genomic.fna |
| 7387 | Salmonella enterica  | GCA_001623665.2_ASM162366v2_genomic.fna |
| 7388 | Escherichia coli     | GCA_001890205.1_ASM189020v1_genomic.fna |
| 7389 | Bordetella pertussis | GCA_001987935.1_ASM198793v1_genomic.fna |
| 7390 | Bordetella pertussis | GCA_001987955.1_ASM198795v1_genomic.fna |
| 7391 | Escherichia coli     | GCA_001890225.1_ASM189022v1_genomic.fna |
| 7392 | Salmonella enterica  | GCA_001623685.1_ASM162368v1_genomic.fna |
| 7393 | Salmonella enterica  | GCA_001623705.1_ASM162370v1_genomic.fna |
| 7394 | Escherichia coli     | GCA_001890245.1_ASM189024v1_genomic.fna |
| 7395 | Bordetella pertussis | GCA_001987975.1_ASM198797v1_genomic.fna |
| 7396 | Bordetella pertussis | GCA_001987995.1_ASM198799v1_genomic.fna |
| 7397 | Escherichia coli     | GCA_001890265.1_ASM189026v1_genomic.fna |
| 7398 | Salmonella enterica  | GCA_001623725.1_ASM162372v1_genomic.fna |
| 7399 | Salmonella enterica  | GCA_001623745.2_ASM162374v2_genomic.fna |
| 7400 | Escherichia coli     | GCA_001890285.1_ASM189028v1_genomic.fna |
| 7401 | Bordetella pertussis | GCA_001988015.1_ASM198801v1_genomic.fna |
| 7402 | Bordetella pertussis | GCA_001988035.1_ASM198803v1_genomic.fna |
| 7403 | Escherichia coli     | GCA_001890305.1_ASM189030v1_genomic.fna |
| 7404 | Salmonella enterica  | GCA_001623765.2_ASM162376v2_genomic.fna |
| 7405 | Salmonella enterica  | GCA_001623775.1_ASM162377v1_genomic.fna |
| 7406 | Escherichia coli     | GCA_001890325.1_ASM189032v1_genomic.fna |
| 7407 | Bordetella pertussis | GCA_001988055.1_ASM198805v1_genomic.fna |
| 7408 | Bordetella pertussis | GCA_001988075.1_ASM198807v1_genomic.fna |
| 7409 | Escherichia coli     | GCA_001890345.1_ASM189034v1_genomic.fna |

|      |                      |                                         |
|------|----------------------|-----------------------------------------|
| 7410 | Salmonella enterica  | GCA_001623805.1_ASM162380v1_genomic.fna |
| 7411 | Salmonella enterica  | GCA_001623825.2_ASM162382v2_genomic.fna |
| 7412 | Escherichia coli     | GCA_001890365.1_ASM189036v1_genomic.fna |
| 7413 | Bordetella pertussis | GCA_001988095.1_ASM198809v1_genomic.fna |
| 7414 | Bordetella pertussis | GCA_001988115.1_ASM198811v1_genomic.fna |
| 7415 | Escherichia coli     | GCA_001900295.1_ASM190029v1_genomic.fna |
| 7416 | Salmonella enterica  | GCA_001623845.1_ASM162384v1_genomic.fna |
| 7417 | Salmonella enterica  | GCA_001628755.1_ASM162875v1_genomic.fna |
| 7418 | Escherichia coli     | GCA_001900315.1_ASM190031v1_genomic.fna |
| 7419 | Bordetella pertussis | GCA_001988135.1_ASM198813v1_genomic.fna |
| 7420 | Bordetella pertussis | GCA_001988155.1_ASM198815v1_genomic.fna |
| 7421 | Escherichia coli     | GCA_001900335.1_ASM190033v1_genomic.fna |
| 7422 | Salmonella enterica  | GCA_001629755.1_ASM162975v1_genomic.fna |
| 7423 | Salmonella enterica  | GCA_001629775.1_ASM162977v1_genomic.fna |
| 7424 | Escherichia coli     | GCA_001900355.1_ASM190035v1_genomic.fna |
| 7425 | Bordetella pertussis | GCA_001988175.1_ASM198817v1_genomic.fna |
| 7426 | Bordetella pertussis | GCA_001988195.1_ASM198819v1_genomic.fna |
| 7427 | Escherichia coli     | GCA_001900375.1_ASM190037v1_genomic.fna |
| 7428 | Salmonella enterica  | GCA_001647045.1_ASM164704v1_genomic.fna |
| 7429 | Salmonella enterica  | GCA_001647755.1_ASM164775v1_genomic.fna |
| 7430 | Escherichia coli     | GCA_001900395.1_ASM190039v1_genomic.fna |
| 7431 | Bordetella pertussis | GCA_001988215.1_ASM198821v1_genomic.fna |
| 7432 | Bordetella pertussis | GCA_001988235.1_ASM198823v1_genomic.fna |
| 7433 | Escherichia coli     | GCA_001900415.1_ASM190041v1_genomic.fna |
| 7434 | Salmonella enterica  | GCA_001689935.1_ASM168993v1_genomic.fna |
| 7435 | Salmonella enterica  | GCA_001690005.1_ASM169000v1_genomic.fna |
| 7436 | Escherichia coli     | GCA_001900435.1_ASM190043v1_genomic.fna |
| 7437 | Bordetella pertussis | GCA_001988255.1_ASM198825v1_genomic.fna |
| 7438 | Bordetella pertussis | GCA_001988275.1_ASM198827v1_genomic.fna |
| 7439 | Escherichia coli     | GCA_001900455.1_ASM190045v1_genomic.fna |
| 7440 | Salmonella enterica  | GCA_001690035.1_ASM169003v1_genomic.fna |
| 7441 | Salmonella enterica  | GCA_001690055.1_ASM169005v1_genomic.fna |
| 7442 | Escherichia coli     | GCA_001900475.1_ASM190047v1_genomic.fna |
| 7443 | Bordetella pertussis | GCA_001988295.1_ASM198829v1_genomic.fna |

|      |                      |                                         |
|------|----------------------|-----------------------------------------|
| 7444 | Bordetella pertussis | GCA_001988315.1_ASM198831v1_genomic.fna |
| 7445 | Escherichia coli     | GCA_001900495.1_ASM190049v1_genomic.fna |
| 7446 | Salmonella enterica  | GCA_001690075.1_ASM169007v1_genomic.fna |
| 7447 | Salmonella enterica  | GCA_001690095.1_ASM169009v1_genomic.fna |
| 7448 | Escherichia coli     | GCA_001900515.1_ASM190051v1_genomic.fna |
| 7449 | Bordetella pertussis | GCA_001988335.1_ASM198833v1_genomic.fna |
| 7450 | Bordetella pertussis | GCA_001988355.1_ASM198835v1_genomic.fna |
| 7451 | Escherichia coli     | GCA_001900535.1_ASM190053v1_genomic.fna |
| 7452 | Salmonella enterica  | GCA_001690115.1_ASM169011v1_genomic.fna |
| 7453 | Salmonella enterica  | GCA_001690135.1_ASM169013v1_genomic.fna |
| 7454 | Escherichia coli     | GCA_001900555.1_ASM190055v1_genomic.fna |
| 7455 | Bordetella pertussis | GCA_001988375.1_ASM198837v1_genomic.fna |
| 7456 | Bordetella pertussis | GCA_001988395.1_ASM198839v1_genomic.fna |
| 7457 | Escherichia coli     | GCA_001900575.1_ASM190057v1_genomic.fna |
| 7458 | Salmonella enterica  | GCA_001692495.1_ASM169249v1_genomic.fna |
| 7459 | Salmonella enterica  | GCA_001692515.1_ASM169251v1_genomic.fna |
| 7460 | Escherichia coli     | GCA_001900595.1_ASM190059v1_genomic.fna |
| 7461 | Bordetella pertussis | GCA_001988415.1_ASM198841v1_genomic.fna |
| 7462 | Bordetella pertussis | GCA_001988435.1_ASM198843v1_genomic.fna |
| 7463 | Escherichia coli     | GCA_001900615.1_ASM190061v1_genomic.fna |
| 7464 | Salmonella enterica  | GCA_001692535.1_ASM169253v1_genomic.fna |
| 7465 | Salmonella enterica  | GCA_001692555.1_ASM169255v1_genomic.fna |
| 7466 | Escherichia coli     | GCA_001900635.1_ASM190063v1_genomic.fna |
| 7467 | Bordetella pertussis | GCA_001988455.1_ASM198845v1_genomic.fna |
| 7468 | Bordetella pertussis | GCA_001988475.1_ASM198847v1_genomic.fna |
| 7469 | Escherichia coli     | GCA_001900655.1_ASM190065v1_genomic.fna |
| 7470 | Salmonella enterica  | GCA_001692575.1_ASM169257v1_genomic.fna |
| 7471 | Salmonella enterica  | GCA_001692595.1_ASM169259v1_genomic.fna |
| 7472 | Escherichia coli     | GCA_001900675.1_ASM190067v1_genomic.fna |
| 7473 | Streptococcus equi   | GCA_002202295.1_ASM220229v1_genomic.fna |
| 7474 | Bordetella pertussis | GCA_001988495.1_ASM198849v1_genomic.fna |
| 7475 | Bordetella pertussis | GCA_001988515.1_ASM198851v1_genomic.fna |
| 7476 | Escherichia coli     | GCA_001900695.1_ASM190069v1_genomic.fna |
| 7477 | Salmonella enterica  | GCA_001692615.1_ASM169261v1_genomic.fna |

|      |                          |                                         |
|------|--------------------------|-----------------------------------------|
| 7478 | Salmonella enterica      | GCA_001692635.1_ASM169263v1_genomic.fna |
| 7479 | Escherichia coli         | GCA_001900715.1_ASM190071v1_genomic.fna |
| 7480 | Bordetella pertussis     | GCA_001988535.1_ASM198853v1_genomic.fna |
| 7481 | Bordetella pertussis     | GCA_001988555.1_ASM198855v1_genomic.fna |
| 7482 | Escherichia coli         | GCA_001900735.1_ASM190073v1_genomic.fna |
| 7483 | Salmonella enterica      | GCA_001692655.1_ASM169265v1_genomic.fna |
| 7484 | Salmonella enterica      | GCA_001705055.1_ASM170505v1_genomic.fna |
| 7485 | Escherichia coli         | GCA_001900775.1_ASM190077v1_genomic.fna |
| 7486 | Burkholderia cenocepacia | GCA_001718515.1_ASM171851v1_genomic.fna |
| 7487 | Bordetella pertussis     | GCA_001988575.1_ASM198857v1_genomic.fna |
| 7488 | Bordetella pertussis     | GCA_001988595.1_ASM198859v1_genomic.fna |
| 7489 | Escherichia coli         | GCA_001900795.1_ASM190079v1_genomic.fna |
| 7490 | Salmonella enterica      | GCA_001705365.1_ASM170536v1_genomic.fna |
| 7491 | Salmonella enterica      | GCA_001729225.1_ASM172922v1_genomic.fna |
| 7492 | Escherichia coli         | GCA_001900815.1_ASM190081v1_genomic.fna |
| 7493 | Bordetella pertussis     | GCA_001988615.1_ASM198861v1_genomic.fna |
| 7494 | Bordetella pertussis     | GCA_001988635.1_ASM198863v1_genomic.fna |
| 7495 | Escherichia coli         | GCA_001900835.1_ASM190083v1_genomic.fna |
| 7496 | Salmonella enterica      | GCA_001886995.1_ASM188699v1_genomic.fna |
| 7497 | Salmonella enterica      | GCA_001887015.1_ASM188701v1_genomic.fna |
| 7498 | Escherichia coli         | GCA_001900885.1_ASM190088v1_genomic.fna |
| 7499 | Bordetella pertussis     | GCA_001988655.1_ASM198865v1_genomic.fna |
| 7500 | Bordetella pertussis     | GCA_001988675.1_ASM198867v1_genomic.fna |
| 7501 | Escherichia coli         | GCA_001900905.1_ASM190090v1_genomic.fna |
| 7502 | Salmonella enterica      | GCA_001890165.1_ASM189016v1_genomic.fna |
| 7503 | Salmonella enterica      | GCA_001890185.1_ASM189018v1_genomic.fna |
| 7504 | Escherichia coli         | GCA_001900925.1_ASM190092v1_genomic.fna |
| 7505 | Bordetella pertussis     | GCA_001988695.1_ASM198869v1_genomic.fna |
| 7506 | Bordetella pertussis     | GCA_001988715.1_ASM198871v1_genomic.fna |
| 7507 | Escherichia coli         | GCA_001900945.1_ASM190094v1_genomic.fna |
| 7508 | Salmonella enterica      | GCA_001890445.1_ASM189044v1_genomic.fna |
| 7509 | Salmonella enterica      | GCA_001922165.1_ASM192216v1_genomic.fna |
| 7510 | Escherichia coli         | GCA_001900965.1_ASM190096v1_genomic.fna |
| 7511 | Bordetella pertussis     | GCA_001988735.1_ASM198873v1_genomic.fna |

|      |                      |                                         |
|------|----------------------|-----------------------------------------|
| 7512 | Bordetella pertussis | GCA_001988755.1_ASM198875v1_genomic.fna |
| 7513 | Escherichia coli     | GCA_001900985.1_ASM190098v1_genomic.fna |
| 7514 | Salmonella enterica  | GCA_001922185.1_ASM192218v1_genomic.fna |
| 7515 | Salmonella enterica  | GCA_001931555.1_ASM193155v1_genomic.fna |
| 7516 | Escherichia coli     | GCA_001901005.1_ASM190100v1_genomic.fna |
| 7517 | Bordetella pertussis | GCA_001988775.1_ASM198877v1_genomic.fna |
| 7518 | Bordetella pertussis | GCA_001988795.1_ASM198879v1_genomic.fna |
| 7519 | Escherichia coli     | GCA_001901025.1_ASM190102v1_genomic.fna |
| 7520 | Salmonella enterica  | GCA_001931575.1_ASM193157v1_genomic.fna |
| 7521 | Salmonella enterica  | GCA_001931595.1_ASM193159v1_genomic.fna |
| 7522 | Escherichia coli     | GCA_001901045.1_ASM190104v1_genomic.fna |
| 7523 | Bordetella pertussis | GCA_001988815.1_ASM198881v1_genomic.fna |
| 7524 | Bordetella pertussis | GCA_001988835.1_ASM198883v1_genomic.fna |
| 7525 | Escherichia coli     | GCA_001901065.1_ASM190106v1_genomic.fna |
| 7526 | Salmonella enterica  | GCA_001931615.1_ASM193161v1_genomic.fna |
| 7527 | Salmonella enterica  | GCA_001941405.1_ASM194140v1_genomic.fna |
| 7528 | Escherichia coli     | GCA_001901085.1_ASM190108v1_genomic.fna |
| 7529 | Bordetella pertussis | GCA_001988855.1_ASM198885v1_genomic.fna |
| 7530 | Bordetella pertussis | GCA_001988875.1_ASM198887v1_genomic.fna |
| 7531 | Escherichia coli     | GCA_001901105.1_ASM190110v1_genomic.fna |
| 7532 | Salmonella enterica  | GCA_001952995.1_ASM195299v1_genomic.fna |
| 7533 | Salmonella enterica  | GCA_001953015.1_ASM195301v1_genomic.fna |
| 7534 | Escherichia coli     | GCA_001901125.1_ASM190112v1_genomic.fna |
| 7535 | Bordetella pertussis | GCA_001988895.1_ASM198889v1_genomic.fna |
| 7536 | Bordetella pertussis | GCA_001988915.1_ASM198891v1_genomic.fna |
| 7537 | Escherichia coli     | GCA_001901145.1_ASM190114v1_genomic.fna |
| 7538 | Salmonella enterica  | GCA_001953035.1_ASM195303v1_genomic.fna |
| 7539 | Salmonella enterica  | GCA_001953675.1_ASM195367v1_genomic.fna |
| 7540 | Escherichia coli     | GCA_001901165.1_ASM190116v1_genomic.fna |
| 7541 | Bordetella pertussis | GCA_001988995.1_ASM198899v1_genomic.fna |
| 7542 | Bordetella pertussis | GCA_001989015.1_ASM198901v1_genomic.fna |
| 7543 | Escherichia coli     | GCA_001901185.1_ASM190118v1_genomic.fna |
| 7544 | Salmonella enterica  | GCA_001953695.1_ASM195369v1_genomic.fna |
| 7545 | Salmonella enterica  | GCA_001956735.1_ASM195673v1_genomic.fna |

|      |                      |                                         |
|------|----------------------|-----------------------------------------|
| 7546 | Escherichia coli     | GCA_001901215.1_ASM190121v1_genomic.fna |
| 7547 | Bordetella pertussis | GCA_001989035.1_ASM198903v1_genomic.fna |
| 7548 | Bordetella pertussis | GCA_001989055.1_ASM198905v1_genomic.fna |
| 7549 | Escherichia coli     | GCA_001901315.1_ASM190131v1_genomic.fna |
| 7550 | Salmonella enterica  | GCA_001969425.1_ASM196942v1_genomic.fna |
| 7551 | Salmonella enterica  | GCA_001973275.2_ASM197327v2_genomic.fna |
| 7552 | Escherichia coli     | GCA_001901365.1_ASM190136v1_genomic.fna |
| 7553 | Bordetella pertussis | GCA_001989075.1_ASM198907v1_genomic.fna |
| 7554 | Bordetella pertussis | GCA_001989095.1_ASM198909v1_genomic.fna |
| 7555 | Escherichia coli     | GCA_001901405.1_ASM190140v1_genomic.fna |
| 7556 | Salmonella enterica  | GCA_001975245.1_ASM197524v1_genomic.fna |
| 7557 | Salmonella enterica  | GCA_001975265.1_ASM197526v1_genomic.fna |
| 7558 | Escherichia coli     | GCA_001901425.1_ASM190142v1_genomic.fna |
| 7559 | Bordetella pertussis | GCA_001989115.1_ASM198911v1_genomic.fna |
| 7560 | Bordetella pertussis | GCA_001989135.1_ASM198913v1_genomic.fna |
| 7561 | Escherichia coli     | GCA_001901445.1_ASM190144v1_genomic.fna |
| 7562 | Salmonella enterica  | GCA_001975285.1_ASM197528v1_genomic.fna |
| 7563 | Salmonella enterica  | GCA_001975305.1_ASM197530v1_genomic.fna |
| 7564 | Escherichia coli     | GCA_001901465.1_ASM190146v1_genomic.fna |
| 7565 | Bordetella pertussis | GCA_001989155.1_ASM198915v1_genomic.fna |
| 7566 | Bordetella pertussis | GCA_001989175.1_ASM198917v1_genomic.fna |
| 7567 | Escherichia coli     | GCA_001932515.1_ASM193251v1_genomic.fna |
| 7568 | Salmonella enterica  | GCA_001975325.1_ASM197532v1_genomic.fna |
| 7569 | Salmonella enterica  | GCA_001975345.1_ASM197534v1_genomic.fna |
| 7570 | Escherichia coli     | GCA_001936315.1_ASM193631v1_genomic.fna |
| 7571 | Bordetella pertussis | GCA_001989195.1_ASM198919v1_genomic.fna |
| 7572 | Bordetella pertussis | GCA_001989215.1_ASM198921v1_genomic.fna |
| 7573 | Escherichia coli     | GCA_001969285.1_ASM196928v1_genomic.fna |
| 7574 | Salmonella enterica  | GCA_001975365.1_ASM197536v1_genomic.fna |
| 7575 | Salmonella enterica  | GCA_001975385.1_ASM197538v1_genomic.fna |
| 7576 | Escherichia coli     | GCA_001999185.1_ASM199918v1_genomic.fna |
| 7577 | Bordetella pertussis | GCA_001989235.1_ASM198923v1_genomic.fna |
| 7578 | Bordetella pertussis | GCA_001989255.1_ASM198925v1_genomic.fna |
| 7579 | Escherichia coli     | GCA_002007705.1_ASM200770v1_genomic.fna |

|      |                      |                                         |
|------|----------------------|-----------------------------------------|
| 7580 | Salmonella enterica  | GCA_001975405.1_ASM197540v1_genomic.fna |
| 7581 | Salmonella enterica  | GCA_001975425.1_ASM197542v1_genomic.fna |
| 7582 | Escherichia coli     | GCA_002009315.1_ASM200931v1_genomic.fna |
| 7583 | Bordetella pertussis | GCA_001989275.1_ASM198927v1_genomic.fna |
| 7584 | Bordetella pertussis | GCA_001989295.1_ASM198929v1_genomic.fna |
| 7585 | Escherichia coli     | GCA_002011945.1_ASM201194v1_genomic.fna |
| 7586 | Salmonella enterica  | GCA_001975445.1_ASM197544v1_genomic.fna |
| 7587 | Salmonella enterica  | GCA_001975515.1_ASM197551v1_genomic.fna |
| 7588 | Escherichia coli     | GCA_002011965.1_ASM201196v1_genomic.fna |
| 7589 | Bordetella pertussis | GCA_001989315.1_ASM198931v1_genomic.fna |
| 7590 | Bordetella pertussis | GCA_001989335.1_ASM198933v1_genomic.fna |
| 7591 | Escherichia coli     | GCA_002011985.1_ASM201198v1_genomic.fna |
| 7592 | Salmonella enterica  | GCA_001975555.1_ASM197555v1_genomic.fna |
| 7593 | Salmonella enterica  | GCA_001975605.1_ASM197560v1_genomic.fna |
| 7594 | Escherichia coli     | GCA_002012005.1_ASM201200v1_genomic.fna |
| 7595 | Bordetella pertussis | GCA_002018515.1_ASM201851v1_genomic.fna |
| 7596 | Bordetella pertussis | GCA_002021795.1_ASM202179v1_genomic.fna |
| 7597 | Escherichia coli     | GCA_002012025.1_ASM201202v1_genomic.fna |
| 7598 | Salmonella enterica  | GCA_001975625.1_ASM197562v1_genomic.fna |
| 7599 | Salmonella enterica  | GCA_001975645.1_ASM197564v1_genomic.fna |
| 7600 | Escherichia coli     | GCA_002012045.1_ASM201204v1_genomic.fna |
| 7601 | Bordetella pertussis | GCA_002068675.1_ASM206867v1_genomic.fna |
| 7602 | Bordetella pertussis | GCA_002068975.1_ASM206897v1_genomic.fna |
| 7603 | Escherichia coli     | GCA_002012065.1_ASM201206v1_genomic.fna |
| 7604 | Salmonella enterica  | GCA_001989635.1_ASM198963v1_genomic.fna |
| 7605 | Salmonella enterica  | GCA_002009155.1_ASM200915v1_genomic.fna |
| 7606 | Escherichia coli     | GCA_002012085.1_ASM201208v1_genomic.fna |
| 7607 | Bordetella pertussis | GCA_002069155.1_ASM206915v1_genomic.fna |
| 7608 | Bordetella pertussis | GCA_002240435.1_ASM224043v1_genomic.fna |
| 7609 | Escherichia coli     | GCA_002012105.1_ASM201210v1_genomic.fna |
| 7610 | Salmonella enterica  | GCA_002119485.1_ASM211948v1_genomic.fna |
| 7611 | Salmonella enterica  | GCA_002128365.1_ASM212836v1_genomic.fna |
| 7612 | Escherichia coli     | GCA_002012125.1_ASM201212v1_genomic.fna |
| 7613 | Bordetella pertussis | GCA_002240475.1_ASM224047v1_genomic.fna |



|      |                             |                                         |
|------|-----------------------------|-----------------------------------------|
| 7614 | <i>Bordetella pertussis</i> | GCA_002240495.1_ASM224049v1_genomic.fna |
| 7615 | <i>Escherichia coli</i>     | GCA_002012145.1_ASM201214v1_genomic.fna |
| 7616 | <i>Salmonella enterica</i>  | GCA_002128385.1_ASM212838v1_genomic.fna |
| 7617 | <i>Salmonella enterica</i>  | GCA_002163995.1_ASM216399v1_genomic.fna |
| 7618 | <i>Escherichia coli</i>     | GCA_002012165.1_ASM201216v1_genomic.fna |
| 7619 | <i>Bordetella pertussis</i> | GCA_002240515.1_ASM224051v1_genomic.fna |
| 7620 | <i>Bordetella pertussis</i> | GCA_002285955.1_ASM228595v1_genomic.fna |
| 7621 | <i>Escherichia coli</i>     | GCA_002012185.1_ASM201218v1_genomic.fna |
| 7622 | <i>Salmonella enterica</i>  | GCA_002196535.1_ASM219653v1_genomic.fna |
| 7623 | <i>Salmonella enterica</i>  | GCA_002201855.1_ASM220185v1_genomic.fna |
| 7624 | <i>Escherichia coli</i>     | GCA_002012205.1_ASM201220v1_genomic.fna |
| 7625 | <i>Bordetella pertussis</i> | GCA_002285975.1_ASM228597v1_genomic.fna |
| 7626 | <i>Bordetella pertussis</i> | GCA_002285995.1_ASM228599v1_genomic.fna |
| 7627 | <i>Escherichia coli</i>     | GCA_002012225.1_ASM201222v1_genomic.fna |
| 7628 | <i>Salmonella enterica</i>  | GCA_002208255.1_ASM220825v1_genomic.fna |
| 7629 | <i>Salmonella enterica</i>  | GCA_002208315.1_ASM220831v1_genomic.fna |
| 7630 | <i>Escherichia coli</i>     | GCA_002012245.1_ASM201224v1_genomic.fna |
| 7631 | <i>Bordetella pertussis</i> | GCA_002286015.1_ASM228601v1_genomic.fna |
| 7632 | <i>Bordetella pertussis</i> | GCA_002286035.1_ASM228603v1_genomic.fna |
| 7633 | <i>Escherichia coli</i>     | GCA_002012265.1_ASM201226v1_genomic.fna |
| 7634 | <i>Yersinia pestis</i>      | GCA_002005285.1_ASM200528v1_genomic.fna |
| 7635 | <i>Salmonella enterica</i>  | GCA_002209205.1_ASM220920v1_genomic.fna |
| 7636 | <i>Salmonella enterica</i>  | GCA_002210025.1_ASM221002v1_genomic.fna |
| 7637 | <i>Escherichia coli</i>     | GCA_002012305.1_ASM201230v1_genomic.fna |
| 7638 | <i>Bordetella pertussis</i> | GCA_002286055.1_ASM228605v1_genomic.fna |
| 7639 | <i>Bordetella pertussis</i> | GCA_002286075.1_ASM228607v1_genomic.fna |
| 7640 | <i>Escherichia coli</i>     | GCA_002024865.1_ASM202486v1_genomic.fna |
| 7641 | <i>Salmonella enterica</i>  | GCA_002211565.1_ASM221156v1_genomic.fna |
| 7642 | <i>Salmonella enterica</i>  | GCA_002211585.1_ASM221158v1_genomic.fna |
| 7643 | <i>Escherichia coli</i>     | GCA_002055605.1_ASM205560v1_genomic.fna |
| 7644 | <i>Bordetella pertussis</i> | GCA_002286095.1_ASM228609v1_genomic.fna |
| 7645 | <i>Bordetella pertussis</i> | GCA_002286115.1_ASM228611v1_genomic.fna |
| 7646 | <i>Escherichia coli</i>     | GCA_002055635.1_ASM205563v1_genomic.fna |
| 7647 | <i>Salmonella enterica</i>  | GCA_002211825.1_ASM221182v1_genomic.fna |

|      |                      |                                         |
|------|----------------------|-----------------------------------------|
| 7648 | Salmonella enterica  | GCA_002211845.1_ASM221184v1_genomic.fna |
| 7649 | Escherichia coli     | GCA_002056065.1_ASM205606v1_genomic.fna |
| 7650 | Bordetella pertussis | GCA_002286135.1_ASM228613v1_genomic.fna |
| 7651 | Bordetella pertussis | GCA_002286155.1_ASM228615v1_genomic.fna |
| 7652 | Escherichia coli     | GCA_002056145.1_ASM205614v1_genomic.fna |
| 7653 | Salmonella enterica  | GCA_002211865.1_ASM221186v1_genomic.fna |
| 7654 | Salmonella enterica  | GCA_002211965.1_ASM221196v1_genomic.fna |
| 7655 | Escherichia coli     | GCA_002056635.1_ASM205663v1_genomic.fna |
| 7656 | Bordetella pertussis | GCA_002286175.1_ASM228617v1_genomic.fna |
| 7657 | Bordetella pertussis | GCA_002286295.1_ASM228629v1_genomic.fna |
| 7658 | Escherichia coli     | GCA_002057245.1_ASM205724v1_genomic.fna |
| 7659 | Salmonella enterica  | GCA_002220345.1_ASM222034v1_genomic.fna |
| 7660 | Salmonella enterica  | GCA_002224405.1_ASM222440v1_genomic.fna |
| 7661 | Escherichia coli     | GCA_002057355.1_ASM205735v1_genomic.fna |
| 7662 | Bordetella pertussis | GCA_002286315.1_ASM228631v1_genomic.fna |
| 7663 | Bordetella pertussis | GCA_002286335.1_ASM228633v1_genomic.fna |
| 7664 | Escherichia coli     | GCA_002058765.1_ASM205876v1_genomic.fna |
| 7665 | Salmonella enterica  | GCA_002234475.1_ASM223447v1_genomic.fna |
| 7666 | Salmonella enterica  | GCA_002234515.1_ASM223451v1_genomic.fna |
| 7667 | Escherichia coli     | GCA_002077195.1_ASM207719v1_genomic.fna |
| 7668 | Bordetella pertussis | GCA_002286355.1_ASM228635v1_genomic.fna |
| 7669 | Bordetella pertussis | GCA_002286375.1_ASM228637v1_genomic.fna |
| 7670 | Escherichia coli     | GCA_002078275.1_ASM207827v1_genomic.fna |
| 7671 | Salmonella enterica  | GCA_002234735.1_ASM223473v1_genomic.fna |
| 7672 | Salmonella enterica  | GCA_002234755.1_ASM223475v1_genomic.fna |
| 7673 | Escherichia coli     | GCA_002078295.1_ASM207829v1_genomic.fna |
| 7674 | Bordetella pertussis | GCA_002310915.1_ASM231091v1_genomic.fna |
| 7675 | Bordetella pertussis | GCA_002442615.1_ASM244261v1_genomic.fna |
| 7676 | Escherichia coli     | GCA_002079225.1_ASM207922v1_genomic.fna |
| 7677 | Salmonella enterica  | GCA_002234775.1_ASM223477v1_genomic.fna |
| 7678 | Salmonella enterica  | GCA_002234795.1_ASM223479v1_genomic.fna |
| 7679 | Escherichia coli     | GCA_002090355.1_ASM209035v1_genomic.fna |
| 7680 | Bordetella pertussis | GCA_002442635.1_ASM244263v1_genomic.fna |
| 7681 | Bordetella pertussis | GCA_002442655.1_ASM244265v1_genomic.fna |

|      |                      |                                         |
|------|----------------------|-----------------------------------------|
| 7682 | Escherichia coli     | GCA_002105735.1_ASM210573v1_genomic.fna |
| 7683 | Salmonella enterica  | GCA_002234855.1_ASM223485v1_genomic.fna |
| 7684 | Salmonella enterica  | GCA_002238275.1_ASM223827v1_genomic.fna |
| 7685 | Escherichia coli     | GCA_002116715.1_ASM211671v1_genomic.fna |
| 7686 | Bordetella pertussis | GCA_002442675.1_ASM244267v1_genomic.fna |
| 7687 | Bordetella pertussis | GCA_002442695.1_ASM244269v1_genomic.fna |
| 7688 | Escherichia coli     | GCA_002118095.1_ASM211809v1_genomic.fna |
| 7689 | Salmonella enterica  | GCA_002290205.1_ASM229020v1_genomic.fna |
| 7690 | Salmonella enterica  | GCA_002313085.1_ASM231308v1_genomic.fna |
| 7691 | Escherichia coli     | GCA_002142675.1_ASM214267v1_genomic.fna |
| 7692 | Bordetella pertussis | GCA_002442715.1_ASM244271v1_genomic.fna |
| 7693 | Bordetella pertussis | GCA_002442735.1_ASM244273v1_genomic.fna |
| 7694 | Escherichia coli     | GCA_002142695.1_ASM214269v1_genomic.fna |
| 7695 | Salmonella enterica  | GCA_002313105.1_ASM231310v1_genomic.fna |
| 7696 | Salmonella enterica  | GCA_002313125.1_ASM231312v1_genomic.fna |
| 7697 | Escherichia coli     | GCA_002142715.1_ASM214271v1_genomic.fna |
| 7698 | Bordetella pertussis | GCA_002442755.1_ASM244275v1_genomic.fna |
| 7699 | Bordetella pertussis | GCA_002442775.1_ASM244277v1_genomic.fna |
| 7700 | Escherichia coli     | GCA_002156825.1_ASM215682v1_genomic.fna |
| 7701 | Salmonella enterica  | GCA_002386165.1_ASM238616v1_genomic.fna |
| 7702 | Salmonella enterica  | GCA_002386325.1_ASM238632v1_genomic.fna |
| 7703 | Escherichia coli     | GCA_002156845.1_ASM215684v1_genomic.fna |
| 7704 | Bordetella pertussis | GCA_002442795.1_ASM244279v1_genomic.fna |
| 7705 | Bordetella pertussis | GCA_002442815.1_ASM244281v1_genomic.fna |
| 7706 | Escherichia coli     | GCA_002157245.1_ASM215724v1_genomic.fna |
| 7707 | Salmonella enterica  | GCA_002504105.1_ASM250410v1_genomic.fna |
| 7708 | Salmonella enterica  | GCA_002504125.1_ASM250412v1_genomic.fna |
| 7709 | Escherichia coli     | GCA_002163655.1_ASM216365v1_genomic.fna |
| 7710 | Bordetella pertussis | GCA_900186845.1_46338_E02_genomic.fna   |
| 7711 | Bordetella pertussis | GCA_900187345.1_42650_A02_genomic.fna   |
| 7712 | Escherichia coli     | GCA_002163695.1_ASM216369v1_genomic.fna |
| 7713 | Salmonella enterica  | GCA_900086565.1_39641_H02_genomic.fna   |
| 7714 | Salmonella enterica  | GCA_900166885.1_39674_D01_genomic.fna   |
| 7715 | Escherichia coli     | GCA_002163935.1_ASM216393v1_genomic.fna |

|      |                               |                                             |
|------|-------------------------------|---------------------------------------------|
| 7716 | <i>Escherichia coli</i>       | GCA_002163955.1_ASM216395v1_genomic.fna     |
| 7717 | <i>Salmonella enterica</i>    | GCA_900184385.1_STMU2UK_genomic.fna         |
| 7718 | <i>Salmonella enterica</i>    | GCA_900185485.1_BL60006_genomic.fna         |
| 7719 | <i>Escherichia coli</i>       | GCA_002180055.1_ASM218005v1_genomic.fna     |
| 7720 | <i>Escherichia coli</i>       | GCA_002180095.1_ASM218009v1_genomic.fna     |
| 7721 | <i>Salmonella enterica</i>    | GCA_900205245.1_ISP_03_07467_98_genomic.fna |
| 7722 | <i>Salmonella enterica</i>    | GCA_900205255.1_1554_genomic.fna            |
| 7723 | <i>Escherichia coli</i>       | GCA_002180135.1_ASM218013v1_genomic.fna     |
| 7724 | <i>Escherichia coli</i>       | GCA_002180195.1_ASM218019v1_genomic.fna     |
| 7725 | <i>Salmonella enterica</i>    | GCA_900205265.1_lupe_GEN0059_5_genomic.fna  |
| 7726 | <i>Salmonella enterica</i>    | GCA_900205275.1_403Ty_genomic.fna           |
| 7727 | <i>Escherichia coli</i>       | GCA_002180215.1_ASM218021v1_genomic.fna     |
| 7728 | <i>Escherichia coli</i>       | GCA_002180275.1_ASM218027v1_genomic.fna     |
| 7729 | <i>Salmonella enterica</i>    | GCA_900205295.1_E98-3139_genomic.fna        |
| 7730 | <i>Escherichia coli</i>       | GCA_002192275.1_ASM219227v1_genomic.fna     |
| 7731 | <i>Escherichia coli</i>       | GCA_002192295.1_ASM219229v1_genomic.fna     |
| 7732 | <i>Escherichia coli</i>       | GCA_002193095.1_ASM219309v1_genomic.fna     |
| 7733 | <i>Escherichia coli</i>       | GCA_002196475.1_ASM219647v1_genomic.fna     |
| 7734 | <i>Escherichia coli</i>       | GCA_002196495.1_ASM219649v1_genomic.fna     |
| 7735 | <i>Streptococcus pyogenes</i> | GCA_000732385.1_ASM73238v1_genomic.fna      |
| 7736 | <i>Streptococcus pyogenes</i> | GCA_001535505.1_ASM153550v1_genomic.fna     |
| 7737 | <i>Escherichia coli</i>       | GCA_002201835.1_ASM220183v1_genomic.fna     |
| 7738 | <i>Escherichia coli</i>       | GCA_002202175.1_ASM220217v1_genomic.fna     |
| 7739 | <i>Streptococcus pyogenes</i> | GCA_001547815.1_ASM154781v1_genomic.fna     |
| 7740 | <i>Escherichia coli</i>       | GCA_002208865.1_ASM220886v1_genomic.fna     |
| 7741 | <i>Escherichia coli</i>       | GCA_002209105.1_ASM220910v1_genomic.fna     |
| 7742 | <i>Escherichia coli</i>       | GCA_002211725.1_ASM221172v1_genomic.fna     |
| 7743 | <i>Escherichia coli</i>       | GCA_002214205.1_ASM221420v1_genomic.fna     |
| 7744 | <i>Escherichia coli</i>       | GCA_002214745.1_ASM221474v1_genomic.fna     |
| 7745 | <i>Escherichia coli</i>       | GCA_002215095.1_ASM221509v1_genomic.fna     |
| 7746 | <i>Escherichia coli</i>       | GCA_002215115.1_ASM221511v1_genomic.fna     |
| 7747 | <i>Escherichia coli</i>       | GCA_002220215.1_ASM222021v1_genomic.fna     |
| 7748 | <i>Escherichia coli</i>       | GCA_002220265.1_ASM222026v1_genomic.fna     |
| 7749 | <i>Escherichia coli</i>       | GCA_002237285.1_ASM223728v1_genomic.fna     |

|      |                        |                                                                      |
|------|------------------------|----------------------------------------------------------------------|
| 7750 | Escherichia coli       | GCA_002237305.1_ASM223730v1_genomic.fna                              |
| 7751 | Escherichia coli       | GCA_002237325.1_ASM223732v1_genomic.fna                              |
| 7752 | Escherichia coli       | GCA_002249955.1_ASM224995v1_genomic.fna                              |
| 7753 | Escherichia coli       | GCA_002269325.1_ASM226932v1_genomic.fna                              |
| 7754 | Escherichia coli       | GCA_002278115.2_ASM227811v2_genomic.fna                              |
| 7755 | Escherichia coli       | GCA_002285755.1_ASM228575v1_genomic.fna                              |
| 7756 | Escherichia coli       | GCA_002302315.1_ASM230231v1_genomic.fna                              |
| 7757 | Escherichia coli       | GCA_002302335.1_ASM230233v1_genomic.fna                              |
| 7758 | Escherichia coli       | GCA_002310555.1_ASM231055v1_genomic.fna                              |
| 7759 | Escherichia coli       | GCA_002310575.1_ASM231057v1_genomic.fna                              |
| 7760 | Escherichia coli       | GCA_002310595.1_ASM231059v1_genomic.fna                              |
| 7761 | Escherichia coli       | GCA_002310615.1_ASM231061v1_genomic.fna                              |
| 7762 | Escherichia coli       | GCA_002310635.1_ASM231063v1_genomic.fna                              |
| 7763 | Escherichia coli       | GCA_002310655.1_ASM231065v1_genomic.fna                              |
| 7764 | Escherichia coli       | GCA_002310675.1_ASM231067v1_genomic.fna                              |
| 7765 | Escherichia coli       | GCA_002310695.1_ASM231069v1_genomic.fna                              |
| 7766 | Escherichia coli       | GCA_002310715.1_ASM231071v1_genomic.fna                              |
| 7767 | Escherichia coli       | GCA_002310735.1_ASM231073v1_genomic.fna                              |
| 7768 | Escherichia coli       | GCA_002357875.1_ASM235787v1_genomic.fna                              |
| 7769 | Escherichia coli       | GCA_002357895.1_ASM235789v1_genomic.fna                              |
| 7770 | Escherichia coli       | GCA_002357915.1_ASM235791v1_genomic.fna                              |
| 7771 | Escherichia coli       | GCA_002393365.1_ASM239336v1_genomic.fna                              |
| 7772 | Escherichia coli       | GCA_002393465.1_ASM239346v1_genomic.fna                              |
| 7773 | Escherichia coli       | GCA_002587005.1_ASM258700v1_genomic.fna                              |
| 7774 | Escherichia coli       | GCA_002589795.1_ASM258979v1_genomic.fna                              |
| 7775 | Escherichia coli       | GCA_002591135.1_ASM259113v1_genomic.fna                              |
| 7776 | Escherichia coli       | GCA_002716885.1_ASM271688v1_genomic.fna                              |
| 7777 | Escherichia coli       | GCA_900092615.1_PRJEB14041_genomic.fna                               |
| 7778 | Escherichia coli       | GCA_900096795.1_Ecoli_AG100_Sample3_Doxycycline_Assembly_genomic.fna |
| 7779 | Escherichia coli       | GCA_900096845.1_Ecoli_AG100_Sample3_M9_Assembly_genomic.fna          |
| 7780 | Escherichia coli       | GCA_900149875.1_EPEC1_genomic.fna                                    |
| 7781 | Escherichia coli       | GCA_900174625.1_WI1-reUpload_genomic.fna                             |
| 7782 | Escherichia coli       | GCA_900186905.1_49923_G01_genomic.fna                                |
| 7783 | Bacillus thuringiensis | GCA_000774075.2_ASM77407v2_genomic.fna                               |

|      |                                  |                                           |
|------|----------------------------------|-------------------------------------------|
| 7784 | <i>Bacillus thuringiensis</i>    | GCA_001675515.1_ASM167551v1_genomic.fna   |
| 7785 | <i>Legionella pneumophila</i>    | GCA_000277025.1_ASM27702v1_genomic.fna    |
| 7786 | <i>Legionella pneumophila</i>    | GCA_000277065.1_ASM27706v1_genomic.fna    |
| 7787 | <i>Legionella pneumophila</i>    | GCA_000404245.1_ASM40424v1_genomic.fna    |
| 7788 | <i>Enterobacter cloacae</i>      | GCA_001620245.1_ASM162024v1_genomic.fna   |
| 7789 | <i>Bordetella pertussis</i>      | GCA_001558395.1_ASM155839v1_genomic.fna   |
| 7790 | <i>Vibrio cholerae</i>           | GCA_001045415.1_ASM104541v1_genomic.fna   |
| 7791 | <i>Burkholderia pseudomallei</i> | GCA_000494855.1_ASM49485v1_genomic.fna    |
| 7792 | <i>Burkholderia pseudomallei</i> | GCA_002111225.1_ASM211122v1_genomic.fna   |
| 7793 | <i>Burkholderia pseudomallei</i> | GCA_002111285.1_ASM211128v1_genomic.fna   |
| 7794 | <i>Enterococcus faecium</i>      | GCA_001594345.1_ASM159434v1_genomic.fna   |
| 7795 | <i>Enterococcus faecium</i>      | GCA_900094185.1_Ef_DMG1500501_genomic.fna |
| 7796 | <i>Helicobacter pylori</i>       | GCA_000262655.1_ASM26265v1_genomic.fna    |
| 7797 | <i>Helicobacter pylori</i>       | GCA_001549855.1_ASM154985v1_genomic.fna   |
| 7798 | <i>Helicobacter pylori</i>       | GCA_001549875.1_ASM154987v1_genomic.fna   |
| 7799 | <i>Campylobacter coli</i>        | GCA_000583775.1_ASM58377v1_genomic.fna    |
| 7800 | <i>Campylobacter coli</i>        | GCA_001305715.1_ASM130571v1_genomic.fna   |
| 7801 | <i>Streptococcus agalactiae</i>  | GCA_000427055.1_ILRI112_genomic.fna       |
| 7802 | <i>Streptococcus agalactiae</i>  | GCA_000599965.1_ASM59996v1_genomic.fna    |
| 7803 | <i>Streptococcus agalactiae</i>  | GCA_000636115.1_ASM63611v1_genomic.fna    |
| 7804 | <i>Streptococcus agalactiae</i>  | GCA_000967445.1_ASM96744v1_genomic.fna    |
| 7805 | <i>Streptococcus agalactiae</i>  | GCA_001190865.1_ASM119086v1_genomic.fna   |
| 7806 | <i>Streptococcus agalactiae</i>  | GCA_001655175.1_ASM165517v1_genomic.fna   |
| 7807 | <i>Streptococcus agalactiae</i>  | GCA_001908255.1_ASM190825v1_genomic.fna   |
| 7808 | <i>Streptococcus suis</i>        | GCA_000014305.1_ASM1430v1_genomic.fna     |
| 7809 | <i>Streptococcus suis</i>        | GCA_000014325.1_ASM1432v1_genomic.fna     |
| 7810 | <i>Streptococcus suis</i>        | GCA_900143575.1_LS9N_genomic.fna          |
| 7811 | <i>Bacillus cereus</i>           | GCA_000724585.1_ASM72458v1_genomic.fna    |
| 7812 | <i>Shigella sonnei</i>           | GCA_002224465.1_ASM222446v1_genomic.fna   |
| 7813 | <i>Clostridioides difficile</i>  | GCA_000210415.1_ASM21041v1_genomic.fna    |
| 7814 | <i>Clostridioides difficile</i>  | GCA_000210455.1_ASM21045v1_genomic.fna    |
| 7815 | <i>Clostridioides difficile</i>  | GCA_000211235.1_ASM21123v1_genomic.fna    |
| 7816 | <i>Clostridioides difficile</i>  | GCA_001010825.1_ASM101082v1_genomic.fna   |
| 7817 | <i>Clostridioides difficile</i>  | GCA_001447175.1_ASM144717v1_genomic.fna   |

|      |                                   |                                         |
|------|-----------------------------------|-----------------------------------------|
| 7818 | <i>Clostridioides difficile</i>   | GCA_001984465.1_ASM198446v1_genomic.fna |
| 7819 | <i>Campylobacter jejuni</i>       | GCA_000184085.1_ASM18408v1_genomic.fna  |
| 7820 | <i>Campylobacter jejuni</i>       | GCA_001506325.1_ASM150632v1_genomic.fna |
| 7821 | <i>Listeria monocytogenes</i>     | GCA_000382925.1_ASM38292v1_genomic.fna  |
| 7822 | <i>Listeria monocytogenes</i>     | GCA_000382945.1_ASM38294v1_genomic.fna  |
| 7823 | <i>Acinetobacter baumannii</i>    | GCA_000015425.1_ASM1542v1_genomic.fna   |
| 7824 | <i>Acinetobacter baumannii</i>    | GCA_000189735.2_ASM18973v2_genomic.fna  |
| 7825 | <i>Acinetobacter baumannii</i>    | GCA_000307975.2_ASM30797v2_genomic.fna  |
| 7826 | <i>Acinetobacter baumannii</i>    | GCA_002009115.1_ASM200911v1_genomic.fna |
| 7827 | <i>Pseudomonas aeruginosa</i>     | GCA_001465155.1_ASM146515v1_genomic.fna |
| 7828 | <i>Klebsiella pneumoniae</i>      | GCA_000714635.1_ASM71463v1_genomic.fna  |
| 7829 | <i>Mycobacterium tuberculosis</i> | GCA_000270345.1_ASM27034v1_genomic.fna  |
| 7830 | <i>Mycobacterium tuberculosis</i> | GCA_000277085.1_ASM27708v1_genomic.fna  |
| 7831 | <i>Mycobacterium tuberculosis</i> | GCA_000277105.1_ASM27710v1_genomic.fna  |
| 7832 | <i>Mycobacterium tuberculosis</i> | GCA_000389905.1_ASM38990v1_genomic.fna  |
| 7833 | <i>Mycobacterium tuberculosis</i> | GCA_000389925.1_ASM38992v1_genomic.fna  |
| 7834 | <i>Mycobacterium tuberculosis</i> | GCA_000954155.1_ASM95415v1_genomic.fna  |
| 7835 | <i>Mycobacterium tuberculosis</i> | GCA_001544675.1_ASM154467v1_genomic.fna |
| 7836 | <i>Mycobacterium tuberculosis</i> | GCA_001544895.1_ASM154489v1_genomic.fna |
| 7837 | <i>Mycobacterium tuberculosis</i> | GCA_001544935.1_ASM154493v1_genomic.fna |
| 7838 | <i>Mycobacterium tuberculosis</i> | GCA_001544985.1_ASM154498v1_genomic.fna |
| 7839 | <i>Mycobacterium tuberculosis</i> | GCA_001545055.1_ASM154505v1_genomic.fna |
| 7840 | <i>Salmonella enterica</i>        | GCA_000272795.2_ASM27279v2_genomic.fna  |
| 7841 | <i>Salmonella enterica</i>        | GCA_000444445.1_ASM44444v1_genomic.fna  |
| 7842 | <i>Salmonella enterica</i>        | GCA_000486525.2_ASM48652v2_genomic.fna  |
| 7843 | <i>Salmonella enterica</i>        | GCA_001278275.1_ASM127827v1_genomic.fna |
| 7844 | <i>Salmonella enterica</i>        | GCA_001278295.1_ASM127829v1_genomic.fna |
| 7845 | <i>Salmonella enterica</i>        | GCA_001302625.1_ASM130262v1_genomic.fna |
| 7846 | <i>Salmonella enterica</i>        | GCA_002079245.1_ASM207924v1_genomic.fna |
| 7847 | <i>Salmonella enterica</i>        | GCA_002208195.1_ASM220819v1_genomic.fna |
| 7848 | <i>Salmonella enterica</i>        | GCA_002208965.1_ASM220896v1_genomic.fna |
| 7849 | <i>Salmonella enterica</i>        | GCA_002209225.1_ASM220922v1_genomic.fna |
| 7850 | <i>Staphylococcus aureus</i>      | GCA_000709475.1_ASM70947v1_genomic.fna  |
| 7851 | <i>Staphylococcus aureus</i>      | GCA_001641045.1_ASM164104v1_genomic.fna |

|      |                       |                                         |
|------|-----------------------|-----------------------------------------|
| 7852 | Staphylococcus aureus | GCA_001717665.1_ASM171766v1_genomic.fna |
| 7853 | Staphylococcus aureus | GCA_001717685.1_ASM171768v1_genomic.fna |
| 7854 | Staphylococcus aureus | GCA_001717705.1_ASM171770v1_genomic.fna |
| 7855 | Staphylococcus aureus | GCA_001717725.1_ASM171772v1_genomic.fna |
| 7856 | Staphylococcus aureus | GCA_001717975.1_ASM171797v1_genomic.fna |
| 7857 | Staphylococcus aureus | GCA_900155335.1_NZ15MR0322_genomic.fna  |
| 7858 | Escherichia coli      | GCA_000988425.1_ASM98842v1_genomic.fna  |
| 7859 | Escherichia coli      | GCA_000988445.1_ASM98844v1_genomic.fna  |
| 7860 | Escherichia coli      | GCA_001513655.1_ASM151365v1_genomic.fna |
| 7861 | Escherichia coli      | GCA_002215155.1_ASM221515v1_genomic.fna |

---
