# Supplementary material for: A New Genome-to-Genome Comparison Approach for Large-Scale Revisiting of Current Microbial Taxonomy
Source: MDPI journal article supplement (doi:10.3390/microorganisms7060161), 2019-06-03
Supplement: s1 [file s1]

**Table S2.** The observed 1220 genus pairs of ambiguous classification.

| <b>genus A</b>  | <b>genus B</b>      | <b>minimum HCR of intra-<br/>genus</b> | <b>maximum HCR of cross-<br/>genus</b> | <b>Phylum A</b> | <b>Phylum B</b> |
|-----------------|---------------------|----------------------------------------|----------------------------------------|-----------------|-----------------|
| Mesoplasma      | Mycoplasma          | 0.025477347                            | 0.393024522                            | Tenericutes     | Tenericutes     |
| Mycoplasma      | Spiroplasma         | 0.025477347                            | 0.292072093                            | Tenericutes     | Tenericutes     |
| Corynebacterium | Brevibacterium      | 0.125961995                            | 0.999978422                            | Actinobacteria  | Actinobacteria  |
| Clostridium     | Ruminiclostridium   | 0.062850588                            | 0.394926701                            | Firmicutes      | Firmicutes      |
| Arsenophonus    | Serratia            | 0.093374951                            | 0.567689795                            | Proteobacteria  | Proteobacteria  |
| Mycoplasma      | Ureaplasma          | 0.025477347                            | 0.153290362                            | Tenericutes     | Tenericutes     |
| Alkaliphilus    | Clostridium         | 0.062850588                            | 0.37022779                             | Firmicutes      | Firmicutes      |
| Buchnera        | Serratia            | 0.093374951                            | 0.543884533                            | Proteobacteria  | Proteobacteria  |
| Chania          | Serratia            | 0.093374951                            | 0.539749427                            | Proteobacteria  | Proteobacteria  |
| Wigglesworthia  | Serratia            | 0.093374951                            | 0.536775217                            | Proteobacteria  | Proteobacteria  |
| Gibbsiella      | Serratia            | 0.093374951                            | 0.535694404                            | Proteobacteria  | Proteobacteria  |
| Serratia        | Raoultella          | 0.093374951                            | 0.474124623                            | Proteobacteria  | Proteobacteria  |
| Pluralibacter   | Serratia            | 0.093374951                            | 0.470894243                            | Proteobacteria  | Proteobacteria  |
| Erwinia         | Serratia            | 0.093374951                            | 0.470282266                            | Proteobacteria  | Proteobacteria  |
| Enterobacter    | Serratia            | 0.093374951                            | 0.47023974                             | Proteobacteria  | Proteobacteria  |
| Rahnella        | Serratia            | 0.093374951                            | 0.465615613                            | Proteobacteria  | Proteobacteria  |
| Cedecea         | Serratia            | 0.093374951                            | 0.463121787                            | Proteobacteria  | Proteobacteria  |
| Cronobacter     | Serratia            | 0.093374951                            | 0.461351074                            | Proteobacteria  | Proteobacteria  |
| Serratia        | Klebsiella          | 0.093374951                            | 0.458439613                            | Proteobacteria  | Proteobacteria  |
| Yersinia        | Serratia            | 0.093374951                            | 0.45825119                             | Proteobacteria  | Proteobacteria  |
| Pantoea         | Serratia            | 0.093374951                            | 0.458031964                            | Proteobacteria  | Proteobacteria  |
| Leclercia       | Serratia            | 0.093374951                            | 0.451964621                            | Proteobacteria  | Proteobacteria  |
| Lelliottia      | Serratia            | 0.093374951                            | 0.449856021                            | Proteobacteria  | Proteobacteria  |
| Serratia        | Enterobacteriaceae  | 0.093374951                            | 0.445376785                            | Proteobacteria  | Proteobacteria  |
| Desulfovibrio   | Pseudodesulfovibrio | 0.143678238                            | 0.676764659                            | Proteobacteria  | Proteobacteria  |
| Serratia        | Kosakonia           | 0.093374951                            | 0.437942693                            | Proteobacteria  | Proteobacteria  |
| Kluyvera        | Serratia            | 0.093374951                            | 0.437425467                            | Proteobacteria  | Proteobacteria  |
| Plautia         | Serratia            | 0.093374951                            | 0.432232945                            | Proteobacteria  | Proteobacteria  |
| Mycoplasma      | Maize               | 0.025477347                            | 0.117101967                            | Tenericutes     | Tenericutes     |
| Shimwellia      | Serratia            | 0.093374951                            | 0.427930381                            | Proteobacteria  | Proteobacteria  |

|                |                   |             |             |                |                |
|----------------|-------------------|-------------|-------------|----------------|----------------|
| Hafnia         | Serratia          | 0.093374951 | 0.42743639  | Proteobacteria | Proteobacteria |
| Serratia       | Blochmannia       | 0.093950708 | 0.428671932 | Proteobacteria | Proteobacteria |
| Serratia       | Dickeya           | 0.093374951 | 0.425491246 | Proteobacteria | Proteobacteria |
| Geosporobacter | Clostridium       | 0.062850588 | 0.285266859 | Firmicutes     | Firmicutes     |
| Citrobacter    | Serratia          | 0.093374951 | 0.419559679 | Proteobacteria | Proteobacteria |
| Burkholderia   | Pseudomonas       | 0.175575691 | 0.787928009 | Proteobacteria | Proteobacteria |
| Serratia       | Pectobacterium    | 0.093374951 | 0.416512347 | Proteobacteria | Proteobacteria |
| Serratia       | Obesumbacterium   | 0.093374951 | 0.413693906 | Proteobacteria | Proteobacteria |
| Edwardsiella   | Serratia          | 0.093374951 | 0.413338404 | Proteobacteria | Proteobacteria |
| Salmonella     | Serratia          | 0.093374951 | 0.409131688 | Proteobacteria | Proteobacteria |
| synthetic      | Serratia          | 0.093374951 | 0.409107419 | Proteobacteria | Proteobacteria |
| Escherichia    | Serratia          | 0.093374951 | 0.407647176 | Proteobacteria | Proteobacteria |
| Shigella       | Serratia          | 0.093374951 | 0.398945239 | Proteobacteria | Proteobacteria |
| Serratia       | Brenneria         | 0.093374951 | 0.395474454 | Proteobacteria | Proteobacteria |
| Mycoplasma     | Aster             | 0.025477347 | 0.106899034 | Tenericutes    | Tenericutes    |
| Sodalis        | Serratia          | 0.093374951 | 0.390155916 | Proteobacteria | Proteobacteria |
| Mycoplasma     | Sneathia          | 0.025477347 | 0.106300298 | Tenericutes    | Fusobacteria   |
| Mycoplasma     | Lactobacillus     | 0.025477347 | 0.104827405 | Tenericutes    | Firmicutes     |
| Baumannia      | Serratia          | 0.093950708 | 0.383007697 | Proteobacteria | Proteobacteria |
| Tatumella      | Serratia          | 0.093374951 | 0.369375987 | Proteobacteria | Proteobacteria |
| Mycoplasma     | Streptobacillus   | 0.025477347 | 0.100348214 | Tenericutes    | Fusobacteria   |
| Cutibacterium  | Propionibacterium | 0.255521499 | 0.999909386 | Actinobacteria | Actinobacteria |
| Gottschalkia   | Clostridium       | 0.062850588 | 0.244964684 | Firmicutes     | Firmicutes     |
| Mycoplasma     | Parvimonas        | 0.025477347 | 0.098476219 | Tenericutes    | Firmicutes     |
| Roseburia      | Eubacterium       | 0.078449324 | 0.302253966 | Firmicutes     | Firmicutes     |
| Mycoplasma     | Onion             | 0.025477347 | 0.098036715 | Tenericutes    | Tenericutes    |
| Morganella     | Serratia          | 0.093374951 | 0.355256354 | Proteobacteria | Proteobacteria |
| Mycoplasma     | Strawberry        | 0.025477347 | 0.096644537 | Tenericutes    | Tenericutes    |
| Mycoplasma     | Erysipelothrix    | 0.025477347 | 0.095434994 | Tenericutes    | Firmicutes     |
| Mycoplasma     | Melissococcus     | 0.025477347 | 0.09255834  | Tenericutes    | Firmicutes     |
| Mycoplasma     | Serratia          | 0.025477347 | 0.092527209 | Tenericutes    | Proteobacteria |
| Mycoplasma     | Buchnera          | 0.025477347 | 0.092317533 | Tenericutes    | Proteobacteria |
| Clostridium    | Ethanoligenens    | 0.062850588 | 0.226698757 | Firmicutes     | Firmicutes     |
| Clostridioides | Clostridium       | 0.062850588 | 0.226177551 | Firmicutes     | Firmicutes     |

|                   |                      |             |             |                |                |
|-------------------|----------------------|-------------|-------------|----------------|----------------|
| Pragia            | Serratia             | 0.093374951 | 0.334996939 | Proteobacteria | Proteobacteria |
| Clostridium       | Thermoanaerobacter   | 0.062850588 | 0.222513278 | Firmicutes     | Firmicutes     |
| Mycoplasma        | Auricoccus           | 0.025477347 | 0.088526757 | Tenericutes    | Firmicutes     |
| Vagococcus        | Mycoplasma           | 0.025477347 | 0.087751112 | Firmicutes     | Tenericutes    |
| Acetoanaerobium   | Clostridium          | 0.062850588 | 0.213054995 | Firmicutes     | Firmicutes     |
| Anaerostipes      | Eubacterium          | 0.078449324 | 0.264337349 | Firmicutes     | Firmicutes     |
| Xenorhabdus       | Serratia             | 0.093374951 | 0.312062601 | Proteobacteria | Proteobacteria |
| Mycoplasma        | Fusobacterium        | 0.025477347 | 0.084570551 | Tenericutes    | Fusobacteria   |
| Mycoplasma        | Carnobacterium       | 0.025477347 | 0.084476001 | Tenericutes    | Firmicutes     |
| Providencia       | Serratia             | 0.093374951 | 0.309382588 | Proteobacteria | Proteobacteria |
| Clostridium       | Thermoanaerobacteriu | 0.062850588 | 0.206437865 | Firmicutes     | Firmicutes     |
| Photorhabdus      | Serratia             | 0.093374951 | 0.301450623 | Proteobacteria | Proteobacteria |
| Mycoplasma        | Pediococcus          | 0.025477347 | 0.082076153 | Tenericutes    | Firmicutes     |
| Mycoplasma        | Staphylococcus       | 0.025477347 | 0.081956648 | Tenericutes    | Firmicutes     |
| Mycoplasma        | Halanaerobium        | 0.025477347 | 0.081759369 | Tenericutes    | Firmicutes     |
| Lachnoclostridium | Clostridium          | 0.062850588 | 0.201076862 | Firmicutes     | Firmicutes     |
| Halanaerobium     | Clostridium          | 0.062850588 | 0.199315336 | Firmicutes     | Firmicutes     |
| Mycoplasma        | Wigglesworthia       | 0.025477347 | 0.080126783 | Tenericutes    | Proteobacteria |
| Aeromonas         | Serratia             | 0.093374951 | 0.293073629 | Proteobacteria | Proteobacteria |
| Proteus           | Serratia             | 0.093374951 | 0.293027824 | Proteobacteria | Proteobacteria |
| Plesiomonas       | Serratia             | 0.093374951 | 0.29252767  | Proteobacteria | Proteobacteria |
| Roseburia         | Clostridium          | 0.062850588 | 0.195253275 | Firmicutes     | Firmicutes     |
| Finegoldia        | Mycoplasma           | 0.025477347 | 0.077824273 | Firmicutes     | Tenericutes    |
| Blautia           | Clostridium          | 0.062850588 | 0.191603505 | Firmicutes     | Firmicutes     |
| Acholeplasma      | Mycoplasma           | 0.025477347 | 0.077462386 | Tenericutes    | Tenericutes    |
| Mycoplasma        | Jeotgalibaca         | 0.025477347 | 0.077270615 | Tenericutes    | Firmicutes     |
| Acetobacterium    | Eubacterium          | 0.078449324 | 0.233426914 | Firmicutes     | Firmicutes     |
| Tetragenococcus   | Mycoplasma           | 0.025477347 | 0.075761655 | Firmicutes     | Tenericutes    |
| Caldanaerobacter  | Clostridium          | 0.062850588 | 0.186838324 | Firmicutes     | Firmicutes     |
| Halobacteroides   | Clostridium          | 0.062850588 | 0.185239875 | Firmicutes     | Firmicutes     |
| Blattabacterium   | Mycoplasma           | 0.025477347 | 0.074857236 | Bacteroidetes  | Tenericutes    |
| Amphibacillus     | Mycoplasma           | 0.025477347 | 0.074576734 | Firmicutes     | Tenericutes    |
| Clostridium       | Fusobacterium        | 0.062850588 | 0.18339051  | Firmicutes     | Fusobacteria   |
| Zobellella        | Serratia             | 0.093374951 | 0.27060128  | Proteobacteria | Proteobacteria |

|                   |                   |             |             |                |                |
|-------------------|-------------------|-------------|-------------|----------------|----------------|
| Lactococcus       | Mycoplasma        | 0.025477347 | 0.073451158 | Firmicutes     | Tenericutes    |
| Tepidanaerobacter | Clostridium       | 0.062850588 | 0.180362159 | Firmicutes     | Firmicutes     |
| Mycoplasma        | Aerococcus        | 0.025477347 | 0.073020224 | Tenericutes    | Firmicutes     |
| Mycoplasma        | Dialister         | 0.025477347 | 0.07266113  | Tenericutes    | Firmicutes     |
| Clostridium       | Ruminococcaceae   | 0.062850588 | 0.178049583 | Firmicutes     | Firmicutes     |
| Mycoplasma        | Brochothrix       | 0.025477347 | 0.072092987 | Tenericutes    | Firmicutes     |
| Mycoplasma        | Clostridium       | 0.025477347 | 0.071650761 | Tenericutes    | Firmicutes     |
| Leuconostoc       | Mycoplasma        | 0.025477347 | 0.070530926 | Firmicutes     | Tenericutes    |
| Acetohalobium     | Clostridium       | 0.062850588 | 0.173931923 | Firmicutes     | Firmicutes     |
| Mycoplasma        | Macrococcus       | 0.025477347 | 0.070441636 | Tenericutes    | Firmicutes     |
| Halobacteroides   | Mycoplasma        | 0.025477347 | 0.070251101 | Firmicutes     | Tenericutes    |
| Mycoplasma        | Arsenophonus      | 0.025477347 | 0.069753878 | Tenericutes    | Proteobacteria |
| Streptococcus     | Mycoplasma        | 0.025477347 | 0.069737266 | Firmicutes     | Tenericutes    |
| Mycoplasma        | Borrelia          | 0.025477347 | 0.069350994 | Tenericutes    | Spirochaetes   |
| Blautia           | Eubacterium       | 0.078449324 | 0.213542842 | Firmicutes     | Firmicutes     |
| Rhodoluna         | Actinobacteria    | 0.072679127 | 0.197279466 | Actinobacteria | Actinobacteria |
| Herbinix          | Clostridium       | 0.062850588 | 0.170353412 | Firmicutes     | Firmicutes     |
| Mycoplasma        | Borrelia          | 0.025477347 | 0.068924713 | Tenericutes    | Spirochaetes   |
| Clostridium       | Parvimonas        | 0.062850588 | 0.169809286 | Firmicutes     | Firmicutes     |
| Bacillus          | Parageobacillus   | 0.132343801 | 0.355950243 | Firmicutes     | Firmicutes     |
| Mycoplasma        | Megamonas         | 0.025477347 | 0.068194906 | Tenericutes    | Firmicutes     |
| Mycoplasma        | Listeria          | 0.025477347 | 0.068062839 | Tenericutes    | Firmicutes     |
| Bacillus          | Anoxybacillus     | 0.132343801 | 0.350887969 | Firmicutes     | Firmicutes     |
| Chryseobacterium  | Flavobacteriaceae | 0.161380659 | 0.42647256  | Bacteroidetes  | Bacteroidetes  |
| Peptoclostridium  | Clostridium       | 0.062850588 | 0.165929701 | Firmicutes     | Firmicutes     |
| Anaerostipes      | Clostridium       | 0.062850588 | 0.165920574 | Firmicutes     | Firmicutes     |
| Mycoplasma        | Clostridioides    | 0.025477347 | 0.067143787 | Tenericutes    | Firmicutes     |
| Pelosinus         | Clostridium       | 0.062850588 | 0.165178975 | Firmicutes     | Firmicutes     |
| Eubacterium       | Clostridium       | 0.062850588 | 0.165078552 | Firmicutes     | Firmicutes     |
| Mycoplasma        | Enterococcus      | 0.025477347 | 0.066882238 | Tenericutes    | Firmicutes     |
| Mycoplasma        | Anaerococcus      | 0.025477347 | 0.066503232 | Tenericutes    | Firmicutes     |
| Serratia          | Pseudomonas       | 0.093374951 | 0.242770525 | Proteobacteria | Proteobacteria |
| Finegoldia        | Clostridium       | 0.062850588 | 0.163338893 | Firmicutes     | Firmicutes     |
| Bacillus          | Aeribacillus      | 0.132343801 | 0.3437568   | Firmicutes     | Firmicutes     |

|                      |                    |             |             |                |                |
|----------------------|--------------------|-------------|-------------|----------------|----------------|
| Lachnoclostridium    | Eubacterium        | 0.078449324 | 0.201144273 | Firmicutes     | Firmicutes     |
| Mycoplasma           | Thermoanaerobacter | 0.025477347 | 0.065038352 | Tenericutes    | Firmicutes     |
| Histophilus          | Haemophilus        | 0.356592956 | 0.908143774 | Proteobacteria | Proteobacteria |
| Mycoplasma           | Baumannia          | 0.025477347 | 0.064260727 | Tenericutes    | Proteobacteria |
| Herbinix             | Eubacterium        | 0.078449324 | 0.197535648 | Firmicutes     | Firmicutes     |
| Aurantimicrobium     | Actinobacteria     | 0.072679127 | 0.182326373 | Actinobacteria | Actinobacteria |
| Paraburkholderia     | Pseudomonas        | 0.175575691 | 0.439935146 | Proteobacteria | Proteobacteria |
| Butyrivibrio         | Eubacterium        | 0.078449324 | 0.19575761  | Firmicutes     | Firmicutes     |
| Caldicellulosiruptor | Clostridium        | 0.062850588 | 0.156451071 | Firmicutes     | Firmicutes     |
| Mycoplasma           | Filifactor         | 0.025477347 | 0.063345272 | Tenericutes    | Firmicutes     |
| Anaerotignum         | Clostridium        | 0.062850588 | 0.155193538 | Firmicutes     | Firmicutes     |
| Mycoplasma           | Leptotrichia       | 0.025477347 | 0.062684426 | Tenericutes    | Fusobacteria   |
| Thermotoga           | Pseudothermotoga   | 0.268941602 | 0.661348822 | Thermotogae    | Thermotogae    |
| Serratia             | Vibrio             | 0.093374951 | 0.229546008 | Proteobacteria | Proteobacteria |
| Azotobacter          | Pseudomonas        | 0.175575691 | 0.431245418 | Proteobacteria | Proteobacteria |
| Cupriavidus          | Ralstonia          | 0.330578046 | 0.811448755 | Proteobacteria | Proteobacteria |
| Tolomonas            | Serratia           | 0.093374951 | 0.22913193  | Proteobacteria | Proteobacteria |
| Ilyobacter           | Clostridium        | 0.062850588 | 0.154172699 | Fusobacteria   | Firmicutes     |
| Thermosipho          | Mycoplasma         | 0.025477347 | 0.06207076  | Thermotogae    | Tenericutes    |
| Vagococcus           | Clostridium        | 0.062850588 | 0.151373291 | Firmicutes     | Firmicutes     |
| Ilyobacter           | Mycoplasma         | 0.025477347 | 0.061169499 | Fusobacteria   | Tenericutes    |
| Chlorobium           | Chlorobaculum      | 0.269516596 | 0.646959688 | Bacteroidetes  | Bacteroidetes  |
| Mycoplasma           | Anoxybacillus      | 0.025477347 | 0.061146577 | Tenericutes    | Firmicutes     |
| Clostridium          | Filifactor         | 0.062850588 | 0.150637725 | Firmicutes     | Firmicutes     |
| Haemophilus          | Serratia           | 0.093374951 | 0.223295566 | Proteobacteria | Proteobacteria |
| Acetoanaerobium      | Mycoplasma         | 0.025477347 | 0.060886317 | Firmicutes     | Tenericutes    |
| Chlamydia            | Chlamydophila      | 0.41910917  | 0.999983732 | Chlamydiae     | Chlamydiae     |
| Halothermothrix      | Clostridium        | 0.062850588 | 0.149502543 | Firmicutes     | Firmicutes     |
| Clostridium          | Natronaerobius     | 0.062850588 | 0.149472605 | Firmicutes     | Firmicutes     |
| Megamonas            | Clostridium        | 0.062850588 | 0.149396922 | Firmicutes     | Firmicutes     |
| Grimontia            | Serratia           | 0.093374951 | 0.221841296 | Proteobacteria | Proteobacteria |
| Bacillus             | Geobacillus        | 0.132343801 | 0.314041514 | Firmicutes     | Firmicutes     |
| Carnobacterium       | Clostridium        | 0.062850588 | 0.14876032  | Firmicutes     | Firmicutes     |
| Marinitoga           | Mycoplasma         | 0.025477347 | 0.060104469 | Thermotogae    | Tenericutes    |

|                   |                       |             |             |                 |                       |
|-------------------|-----------------------|-------------|-------------|-----------------|-----------------------|
| Mycoplasma        | Blochmannia           | 0.025477347 | 0.059927766 | Tenericutes     | Proteobacteria        |
| Mahella           | Clostridium           | 0.062850588 | 0.147452815 | Firmicutes      | Firmicutes            |
| Mycoplasma        | Rummeliibacillus      | 0.025477347 | 0.059569882 | Tenericutes     | Firmicutes            |
| Anaerococcus      | Clostridium           | 0.062850588 | 0.145782905 | Firmicutes      | Firmicutes            |
| Butyrivibrio      | Clostridium           | 0.062850588 | 0.14554169  | Firmicutes      | Firmicutes            |
| Mycoplasma        | Oenococcus            | 0.025477347 | 0.058886888 | Tenericutes     | Firmicutes            |
| Desulfotomaculum  | Clostridium           | 0.062850588 | 0.14433377  | Firmicutes      | Firmicutes            |
| Mycoplasma        | Desulfurobacterium    | 0.025477347 | 0.058463639 | Tenericutes     | Aquificae             |
| Mycoplasma        | Arcobacter            | 0.025477347 | 0.058455972 | Tenericutes     | Proteobacteria        |
| Ruminococcus      | Clostridium           | 0.062850588 | 0.144105956 | Firmicutes      | Firmicutes            |
| Mesoplasma        | Spiroplasma           | 0.159751234 | 0.365244672 | Tenericutes     | Tenericutes           |
| Mycoplasma        | Campylobacter         | 0.025477347 | 0.058155823 | Tenericutes     | Proteobacteria        |
| Defluviitoga      | Mycoplasma            | 0.025477347 | 0.058091186 | Thermotogae     | Tenericutes           |
| Mycoplasma        | Thermoanaerobacteriu  | 0.025477347 | 0.057785089 | Tenericutes     | Firmicutes            |
| Clostridium       | Dehalobacterium       | 0.062850588 | 0.141637437 | Firmicutes      | Firmicutes            |
| Mycoplasma        | Thermodesulfobacteriu | 0.025477347 | 0.057119952 | Tenericutes     | Thermodesulfobacteria |
| Aliivibrio        | Vibrio                | 0.271195069 | 0.605076732 | Proteobacteria  | Proteobacteria        |
| Clostridium       | Flavonifractor        | 0.062850588 | 0.139893291 | Firmicutes      | Firmicutes            |
| Mycoplasma        | Oceanobacillus        | 0.025477347 | 0.056658086 | Tenericutes     | Firmicutes            |
| Desulfosporosinus | Clostridium           | 0.062850588 | 0.139735072 | Firmicutes      | Firmicutes            |
| Planococcus       | Mycoplasma            | 0.025477347 | 0.056577585 | Firmicutes      | Tenericutes           |
| Allofrancisella   | Mycoplasma            | 0.025477347 | 0.056487228 | Proteobacteria  | Tenericutes           |
| Bacillus          | Clostridium           | 0.062850588 | 0.139302737 | Firmicutes      | Firmicutes            |
| Gottschalkia      | Mycoplasma            | 0.025477347 | 0.056436897 | Firmicutes      | Tenericutes           |
| Acetobacterium    | Clostridium           | 0.062850588 | 0.139206894 | Firmicutes      | Firmicutes            |
| Ferrimonas        | Serratia              | 0.093950708 | 0.20804697  | Proteobacteria  | Proteobacteria        |
| Intestinimonas    | Clostridium           | 0.062850588 | 0.138988992 | Firmicutes      | Firmicutes            |
| Sneathia          | Clostridium           | 0.062850588 | 0.138430009 | Fusobacteria    | Firmicutes            |
| Deferribacter     | Mycoplasma            | 0.025477347 | 0.055736062 | Deferribacteres | Tenericutes           |
| Bacillus          | Mycoplasma            | 0.025477347 | 0.055643465 | Firmicutes      | Tenericutes           |
| Leptotrichia      | Clostridium           | 0.062850588 | 0.137134366 | Fusobacteria    | Firmicutes            |
| Mycoplasma        | Dictyoglomus          | 0.025477347 | 0.055055089 | Tenericutes     | Dictyoglomi           |
| Mycoplasma        | Lawsonia              | 0.025477347 | 0.054930781 | Tenericutes     | Proteobacteria        |
| Fictibacillus     | Bacillus              | 0.132343801 | 0.285294649 | Firmicutes      | Firmicutes            |

|                      |                   |             |             |                |                |
|----------------------|-------------------|-------------|-------------|----------------|----------------|
| Amphibacillus        | Clostridium       | 0.062850588 | 0.135464601 | Firmicutes     | Firmicutes     |
| Riemerella           | Flavobacteriaceae | 0.161380659 | 0.347239911 | Bacteroidetes  | Bacteroidetes  |
| Streptobacillus      | Clostridium       | 0.068824019 | 0.147892936 | Fusobacteria   | Firmicutes     |
| Clostridium          | Thermincola       | 0.062850588 | 0.134938911 | Firmicutes     | Firmicutes     |
| Burkholderiales      | Laribacter        | 0.092214558 | 0.197974696 | Proteobacteria | Proteobacteria |
| Staphylococcus       | Clostridium       | 0.062850588 | 0.134274401 | Firmicutes     | Firmicutes     |
| Clostridium          | Lactobacillus     | 0.062850588 | 0.133962926 | Firmicutes     | Firmicutes     |
| Oceanobacillus       | Clostridium       | 0.062850588 | 0.13366524  | Firmicutes     | Firmicutes     |
| Mycoplasma           | Lysinibacillus    | 0.025477347 | 0.053848143 | Tenericutes    | Firmicutes     |
| Actinobacillus       | Serratia          | 0.093374951 | 0.196633434 | Proteobacteria | Proteobacteria |
| Francisella          | Mycoplasma        | 0.025477347 | 0.053472041 | Proteobacteria | Tenericutes    |
| Kocuria              | Brevibacterium    | 0.125961995 | 0.264062871 | Actinobacteria | Actinobacteria |
| Clostridium          | Melissococcus     | 0.062850588 | 0.131673615 | Firmicutes     | Firmicutes     |
| Paraphotobacterium   | Mycoplasma        | 0.025477347 | 0.053272222 | Proteobacteria | Tenericutes    |
| Mycoplasma           | Prochlorococcus   | 0.025477347 | 0.052970717 | Tenericutes    | Cyanobacteria  |
| Listeria             | Clostridium       | 0.062850588 | 0.130519333 | Firmicutes     | Firmicutes     |
| Thermosediminibacter | Clostridium       | 0.062850588 | 0.130431617 | Firmicutes     | Firmicutes     |
| Photobacterium       | Serratia          | 0.093374951 | 0.193621755 | Proteobacteria | Proteobacteria |
| Desulfitobacterium   | Clostridium       | 0.062850588 | 0.130095828 | Firmicutes     | Firmicutes     |
| Sulfurihydrogenibium | Mycoplasma        | 0.025477347 | 0.052735121 | Aquificae      | Tenericutes    |
| Erwinia              | Sodalis           | 0.189313104 | 0.391743909 | Proteobacteria | Proteobacteria |
| Oscillibacter        | Clostridium       | 0.062850588 | 0.129913709 | Firmicutes     | Firmicutes     |
| Serratia             | Aggregatibacter   | 0.093374951 | 0.192563213 | Proteobacteria | Proteobacteria |
| Acidothermus         | Actinobacteria    | 0.072679127 | 0.149688992 | Actinobacteria | Actinobacteria |
| Coxiella             | Mycoplasma        | 0.025477347 | 0.052446592 | Proteobacteria | Tenericutes    |
| Pantoea              | Sodalis           | 0.189313104 | 0.388520644 | Proteobacteria | Proteobacteria |
| Burkholderiales      | Rugosibacter      | 0.092214558 | 0.18924114  | Proteobacteria | Proteobacteria |
| Kitasatospora        | Streptomyces      | 0.354202047 | 0.726292879 | Actinobacteria | Actinobacteria |
| Paraglaciicola       | Pseudoalteromonas | 0.161098934 | 0.330079459 | Proteobacteria | Proteobacteria |
| Mycoplasma           | Virgibacillus     | 0.025477347 | 0.052191217 | Tenericutes    | Firmicutes     |
| Anoxybacillus        | Clostridium       | 0.062850588 | 0.128620836 | Firmicutes     | Firmicutes     |
| Mycoplasma           | Ichthyobacterium  | 0.025477347 | 0.051916627 | Tenericutes    | Bacteroidetes  |
| Mycoplasma           | Weissella         | 0.025477347 | 0.051846601 | Tenericutes    | Firmicutes     |
| Oceanisphaera        | Serratia          | 0.093937707 | 0.191116347 | Proteobacteria | Proteobacteria |

|                  |                      |             |             |                 |                |
|------------------|----------------------|-------------|-------------|-----------------|----------------|
| Mycoplasma       | Ezakiella            | 0.025477347 | 0.0516976   | Tenericutes     | Firmicutes     |
| Dialister        | Clostridium          | 0.062850588 | 0.127419873 | Firmicutes      | Firmicutes     |
| Mycoplasma       | Rickettsia           | 0.025477347 | 0.051540251 | Tenericutes     | Proteobacteria |
| Mycoplasma       | Brachyspira          | 0.025477347 | 0.051259824 | Tenericutes     | Spirochaetes   |
| Cronobacter      | Sodalis              | 0.189313104 | 0.380317179 | Proteobacteria  | Proteobacteria |
| Mycoplasma       | Solibacillus         | 0.025477347 | 0.051134801 | Tenericutes     | Firmicutes     |
| Thermococcus     | Pyrococcus           | 0.351634878 | 0.705169843 | Euryarchaeota   | Euryarchaeota  |
| Clostridium      | Carboxydotherrhus    | 0.062850588 | 0.125900226 | Firmicutes      | Firmicutes     |
| Brochothrix      | Clostridium          | 0.062850588 | 0.12587094  | Firmicutes      | Firmicutes     |
| Bacillus         | Virgibacillus        | 0.132343801 | 0.264910237 | Firmicutes      | Firmicutes     |
| Veillonella      | Mycoplasma           | 0.025477347 | 0.050991793 | Firmicutes      | Tenericutes    |
| Bacillus         | Oceanobacillus       | 0.132343801 | 0.264694914 | Firmicutes      | Firmicutes     |
| Jeotgalibaca     | Clostridium          | 0.062850588 | 0.125627878 | Firmicutes      | Firmicutes     |
| Pediococcus      | Lactobacillus        | 0.158222465 | 0.316065418 | Firmicutes      | Firmicutes     |
| Desulfurella     | Mycoplasma           | 0.025477347 | 0.050815793 | Proteobacteria  | Tenericutes    |
| Bacillus         | Terribacillus        | 0.132343801 | 0.263846126 | Firmicutes      | Firmicutes     |
| Sodalis          | Enterobacter         | 0.189313104 | 0.376766613 | Proteobacteria  | Proteobacteria |
| Desulfovibrio    | Desulfomicrobium     | 0.143678238 | 0.285622396 | Proteobacteria  | Proteobacteria |
| Mycoplasma       | Caldicellulosiruptor | 0.025477347 | 0.050594935 | Tenericutes     | Firmicutes     |
| Paraburkholderia | Burkholderia         | 0.232579852 | 0.461546577 | Proteobacteria  | Proteobacteria |
| Mycoplasma       | Sporosarcina         | 0.025477347 | 0.050537485 | Tenericutes     | Firmicutes     |
| Bacillus         | Lysinibacillus       | 0.132343801 | 0.262471597 | Firmicutes      | Firmicutes     |
| Dictyoglomus     | Clostridium          | 0.062850588 | 0.124458355 | Dictyoglomi     | Firmicutes     |
| Pasteurella      | Serratia             | 0.093374951 | 0.184895938 | Proteobacteria  | Proteobacteria |
| Virgibacillus    | Clostridium          | 0.062850588 | 0.124078811 | Firmicutes      | Firmicutes     |
| Sodalis          | Plautia              | 0.189313104 | 0.372080498 | Proteobacteria  | Proteobacteria |
| Deferribacter    | Clostridium          | 0.062850588 | 0.123522279 | Deferribacteres | Firmicutes     |
| Sodalis          | Gibbsiella           | 0.189313104 | 0.371938132 | Proteobacteria  | Proteobacteria |
| Mycoplasma       | Acetohalobium        | 0.025477347 | 0.05003134  | Tenericutes     | Firmicutes     |
| Bacillus         | Planococcus          | 0.132343801 | 0.259807239 | Firmicutes      | Firmicutes     |
| Mycoplasma       | Herbinix             | 0.025477347 | 0.049762002 | Tenericutes     | Firmicutes     |
| Bacillus         | Sporosarcina         | 0.132343801 | 0.257738812 | Firmicutes      | Firmicutes     |
| Rahnella         | Sodalis              | 0.189313104 | 0.368639601 | Proteobacteria  | Proteobacteria |
| Mycoplasma       | Eubacterium          | 0.025477347 | 0.049577839 | Tenericutes     | Firmicutes     |



|                  |                    |             |             |                |                |
|------------------|--------------------|-------------|-------------|----------------|----------------|
| Brevibacterium   | Micrococcus        | 0.125961995 | 0.244936426 | Actinobacteria | Actinobacteria |
| Pandoraea        | Pseudomonas        | 0.175575691 | 0.340789917 | Proteobacteria | Proteobacteria |
| Lelliottia       | Sodalis            | 0.189313104 | 0.366222921 | Proteobacteria | Proteobacteria |
| Sinomonas        | Brevibacterium     | 0.125961995 | 0.24359065  | Actinobacteria | Actinobacteria |
| Sodalis          | Klebsiella         | 0.189313104 | 0.366070485 | Proteobacteria | Proteobacteria |
| Mycoplasma       | Alkaliphilus       | 0.025477347 | 0.049263315 | Tenericutes    | Firmicutes     |
| Tetragenococcus  | Clostridium        | 0.062850588 | 0.121426359 | Firmicutes     | Firmicutes     |
| Shewanella       | Serratia           | 0.093374951 | 0.180303738 | Proteobacteria | Proteobacteria |
| Mycoplasma       | Mageeibacillus     | 0.025477347 | 0.049067051 | Tenericutes    | Firmicutes     |
| Sodalis          | Cedecea            | 0.189313104 | 0.364244919 | Proteobacteria | Proteobacteria |
| Sodalis          | Kosakonia          | 0.189313104 | 0.36323503  | Proteobacteria | Proteobacteria |
| Cupriavidus      | Pseudomonas        | 0.175575691 | 0.336690155 | Proteobacteria | Proteobacteria |
| Mycoplasma       | Caldanaerobacter   | 0.025477347 | 0.048829488 | Tenericutes    | Firmicutes     |
| Gallibacterium   | Serratia           | 0.093374951 | 0.178960809 | Proteobacteria | Proteobacteria |
| Sodalis          | Leclercia          | 0.189313104 | 0.362455977 | Proteobacteria | Proteobacteria |
| Bacillus         | Rummeliibacillus   | 0.132343801 | 0.253165639 | Firmicutes     | Firmicutes     |
| Fictibacillus    | Clostridium        | 0.062850588 | 0.120200552 | Firmicutes     | Firmicutes     |
| Alteromonas      | Pseudoalteromonas  | 0.161098934 | 0.308016317 | Proteobacteria | Proteobacteria |
| Sodalis          | Raoultella         | 0.189313104 | 0.361868755 | Proteobacteria | Proteobacteria |
| Faecalibacterium | Clostridium        | 0.062850588 | 0.120080944 | Firmicutes     | Firmicutes     |
| Caldisericum     | Mycoplasma         | 0.025477347 | 0.04863718  | Caldiserica    | Tenericutes    |
| Serratia         | Mannheimia         | 0.093374951 | 0.177593219 | Proteobacteria | Proteobacteria |
| Sodalis          | Dickeya            | 0.189313104 | 0.358904543 | Proteobacteria | Proteobacteria |
| Marinitoga       | Clostridium        | 0.062850588 | 0.119062607 | Thermotogae    | Firmicutes     |
| Planococcus      | Clostridium        | 0.062850588 | 0.119044108 | Firmicutes     | Firmicutes     |
| Clostridium      | Rummeliibacillus   | 0.062850588 | 0.118930094 | Firmicutes     | Firmicutes     |
| Dehalobacter     | Clostridium        | 0.062850588 | 0.118850955 | Firmicutes     | Firmicutes     |
| Sodalis          | Citrobacter        | 0.189313104 | 0.357911196 | Proteobacteria | Proteobacteria |
| Auricoccus       | Clostridium        | 0.062850588 | 0.118685439 | Firmicutes     | Firmicutes     |
| Mycoplasma       | Halothermothrix    | 0.025477347 | 0.048035324 | Tenericutes    | Firmicutes     |
| Pluralibacter    | Sodalis            | 0.189313104 | 0.356600532 | Proteobacteria | Proteobacteria |
| Bacillus         | Jeotgalibacillus   | 0.132343801 | 0.248727168 | Firmicutes     | Firmicutes     |
| Sodalis          | Enterobacteriaceae | 0.189313104 | 0.355534119 | Proteobacteria | Proteobacteria |
| Syntrophobotulus | Clostridium        | 0.062850588 | 0.117649647 | Firmicutes     | Firmicutes     |

|                     |                  |             |             |                |                |
|---------------------|------------------|-------------|-------------|----------------|----------------|
| Flavobacteriaceae   | Elizabethkingia  | 0.161380659 | 0.302060317 | Bacteroidetes  | Bacteroidetes  |
| Mycoplasma          | Haemophilus      | 0.025477347 | 0.047578548 | Tenericutes    | Proteobacteria |
| Anaerostipes        | Mycoplasma       | 0.025477347 | 0.047543996 | Firmicutes     | Tenericutes    |
| Macrococcus         | Clostridium      | 0.062850588 | 0.117186633 | Firmicutes     | Firmicutes     |
| Defluviitoga        | Clostridium      | 0.062850588 | 0.11712072  | Thermotogae    | Firmicutes     |
| Veillonella         | Clostridium      | 0.062850588 | 0.117014562 | Firmicutes     | Firmicutes     |
| Escherichia         | Sodalis          | 0.189313104 | 0.35202389  | Proteobacteria | Proteobacteria |
| Salmonella          | Sodalis          | 0.189313104 | 0.351809762 | Proteobacteria | Proteobacteria |
| Bacillus            | Solibacillus     | 0.132343801 | 0.245427912 | Firmicutes     | Firmicutes     |
| Sodalis             | Brenneria        | 0.189313104 | 0.350509193 | Proteobacteria | Proteobacteria |
| Diaphorobacter      | Acidovorax       | 0.464019965 | 0.858878301 | Proteobacteria | Proteobacteria |
| Shimwellia          | Sodalis          | 0.189313104 | 0.349803394 | Proteobacteria | Proteobacteria |
| Mycoplasma          | Fervidobacterium | 0.025477347 | 0.04706694  | Tenericutes    | Thermotogae    |
| Sodalis             | Shigella         | 0.189313104 | 0.347718415 | Proteobacteria | Proteobacteria |
| Enterococcus        | Clostridium      | 0.062850588 | 0.115116126 | Firmicutes     | Firmicutes     |
| Exiguobacterium     | Mycoplasma       | 0.025477347 | 0.046663167 | Firmicutes     | Tenericutes    |
| Sodalis             | synthetic        | 0.189313104 | 0.346605252 | Proteobacteria | Proteobacteria |
| Glutamicibacter     | Brevibacterium   | 0.125961995 | 0.230480835 | Actinobacteria | Actinobacteria |
| Neomicrococcus      | Actinobacteria   | 0.072679127 | 0.132734379 | Actinobacteria | Actinobacteria |
| Sodalis             | Pectobacterium   | 0.189313104 | 0.345681002 | Proteobacteria | Proteobacteria |
| Yersinia            | Sodalis          | 0.189313104 | 0.345591518 | Proteobacteria | Proteobacteria |
| Anaerotignum        | Eubacterium      | 0.078449324 | 0.143128624 | Firmicutes     | Firmicutes     |
| Gilliamella         | Serratia         | 0.093374951 | 0.170319816 | Proteobacteria | Proteobacteria |
| Delftia             | Serratia         | 0.093374951 | 0.170050344 | Proteobacteria | Proteobacteria |
| Kluyvera            | Sodalis          | 0.189313104 | 0.343696081 | Proteobacteria | Proteobacteria |
| Bacillus            | Halobacillus     | 0.132343801 | 0.239834925 | Firmicutes     | Firmicutes     |
| Acholeplasma        | Clostridium      | 0.062850588 | 0.113849827 | Tenericutes    | Firmicutes     |
| Janibacter          | Brevibacterium   | 0.125961995 | 0.228159604 | Actinobacteria | Actinobacteria |
| Mycoplasma          | Jeotgalibacillus | 0.025477347 | 0.04603116  | Tenericutes    | Firmicutes     |
| Cedecea             | Klebsiella       | 0.459467233 | 0.829742343 | Proteobacteria | Proteobacteria |
| Thermodesulfovibrio | Clostridium      | 0.062850588 | 0.113341622 | Nitrospirae    | Firmicutes     |
| Sodalis             | Edwardsiella     | 0.189313104 | 0.341194298 | Proteobacteria | Proteobacteria |
| Mycoplasma          | Petrotoga        | 0.025477347 | 0.045857376 | Tenericutes    | Thermotogae    |
| Mycoplasma          | Tenacibaculum    | 0.025477347 | 0.045730159 | Tenericutes    | Bacteroidetes  |

|                   |                     |             |             |                |                |
|-------------------|---------------------|-------------|-------------|----------------|----------------|
| Aeribacillus      | Clostridium         | 0.062850588 | 0.112598785 | Firmicutes     | Firmicutes     |
| Lysinibacillus    | Clostridium         | 0.062850588 | 0.111909051 | Firmicutes     | Firmicutes     |
| Aliivibrio        | Serratia            | 0.093374951 | 0.166153859 | Proteobacteria | Proteobacteria |
| Pseudarthrobacter | Brevibacterium      | 0.125961995 | 0.223933403 | Actinobacteria | Actinobacteria |
| Brevibacterium    | Isoptericola        | 0.125961995 | 0.223566468 | Actinobacteria | Actinobacteria |
| Clostridium       | Sealdella           | 0.068824019 | 0.12215169  | Firmicutes     | Fusobacteria   |
| Jonesia           | Actinobacteria      | 0.072679127 | 0.128876572 | Actinobacteria | Actinobacteria |
| Mycoplasma        | Nautilia            | 0.025477347 | 0.045131723 | Tenericutes    | Proteobacteria |
| Brachybacterium   | Brevibacterium      | 0.125961995 | 0.222974104 | Actinobacteria | Actinobacteria |
| Mycoplasma        | Thermodesulfovibrio | 0.025477347 | 0.044913956 | Tenericutes    | Nitrospirae    |
| Eubacterium       | Filifactor          | 0.078449324 | 0.138242455 | Firmicutes     | Firmicutes     |
| Aeribacillus      | Mycoplasma          | 0.025477347 | 0.044853374 | Firmicutes     | Tenericutes    |
| Ezakiella         | Clostridium         | 0.062850588 | 0.110563806 | Firmicutes     | Firmicutes     |
| Streptococcus     | Clostridium         | 0.062850588 | 0.110535028 | Firmicutes     | Firmicutes     |
| Frischella        | Serratia            | 0.093374951 | 0.163834129 | Proteobacteria | Proteobacteria |
| Bibersteinia      | Serratia            | 0.093374951 | 0.163708532 | Proteobacteria | Proteobacteria |
| Lactococcus       | Clostridium         | 0.062850588 | 0.110029702 | Firmicutes     | Firmicutes     |
| Herbaspirillum    | Pseudomonas         | 0.175575691 | 0.306938684 | Proteobacteria | Proteobacteria |
| Fictibacillus     | Mycoplasma          | 0.025477347 | 0.0444956   | Firmicutes     | Tenericutes    |
| Ralstonia         | Pseudomonas         | 0.175575691 | 0.306591152 | Proteobacteria | Proteobacteria |
| Microbacterium    | Brevibacterium      | 0.125961995 | 0.219931789 | Actinobacteria | Actinobacteria |
| Mycoplasma        | Cardinium           | 0.025477347 | 0.044407386 | Tenericutes    | Bacteroidetes  |
| Terribacillus     | Mycoplasma          | 0.025477347 | 0.044377413 | Firmicutes     | Tenericutes    |
| Thermosipho       | Clostridium         | 0.068824019 | 0.119607561 | Thermotogae    | Firmicutes     |
| Rhizorhabdus      | Sphingomonas        | 0.292558438 | 0.508278627 | Proteobacteria | Proteobacteria |
| Brevibacillus     | Clostridium         | 0.062850588 | 0.109073872 | Firmicutes     | Firmicutes     |
| Chlorobium        | Pelodictyon         | 0.269516596 | 0.467435234 | Bacteroidetes  | Bacteroidetes  |
| Lawsonella        | Actinobacteria      | 0.072679127 | 0.125905818 | Actinobacteria | Actinobacteria |
| Mycoplasma        | Histophilus         | 0.025477347 | 0.044065437 | Tenericutes    | Proteobacteria |
| Sodalis           | Hafnia              | 0.189313104 | 0.327381214 | Proteobacteria | Proteobacteria |
| Weissella         | Lactobacillus       | 0.158222465 | 0.273555815 | Firmicutes     | Firmicutes     |
| Jeotgalibacillus  | Clostridium         | 0.062850588 | 0.107870687 | Firmicutes     | Firmicutes     |
| Mycoplasma        | Taylorella          | 0.025477347 | 0.043629096 | Tenericutes    | Proteobacteria |
| Mycoplasma        | Natranaerobius      | 0.025477347 | 0.043624119 | Tenericutes    | Firmicutes     |

|                    |                      |             |             |                |                       |
|--------------------|----------------------|-------------|-------------|----------------|-----------------------|
| Desulfurobacterium | Clostridium          | 0.062850588 | 0.10737445  | Aquificae      | Firmicutes            |
| Microterricola     | Brevibacterium       | 0.125961995 | 0.215173259 | Actinobacteria | Actinobacteria        |
| Solibacillus       | Clostridium          | 0.062850588 | 0.107313166 | Firmicutes     | Firmicutes            |
| Pasteurella        | Mycoplasma           | 0.025477347 | 0.043492105 | Proteobacteria | Tenericutes           |
| Thermobacillus     | Paenibacillus        | 0.161111346 | 0.274919624 | Firmicutes     | Firmicutes            |
| Microcella         | Actinobacteria       | 0.072679127 | 0.123782533 | Actinobacteria | Actinobacteria        |
| Clostridium        | Parageobacillus      | 0.062850588 | 0.106795798 | Firmicutes     | Firmicutes            |
| Lachnoclostridium  | Herbinix             | 0.132857063 | 0.225564058 | Firmicutes     | Firmicutes            |
| Mycoplasma         | Parageobacillus      | 0.025477347 | 0.043249272 | Tenericutes    | Firmicutes            |
| Dermacoccus        | Actinobacteria       | 0.072679127 | 0.122987209 | Actinobacteria | Actinobacteria        |
| Desulfurella       | Clostridium          | 0.062850588 | 0.106319659 | Proteobacteria | Firmicutes            |
| Clostridium        | Thermodesulfobacteri | 0.063423572 | 0.107214395 | Firmicutes     | Thermodesulfobacteria |
| Chania             | Sodalis              | 0.189313104 | 0.319997694 | Proteobacteria | Proteobacteria        |
| Sodalis            | Obesumbacterium      | 0.189313104 | 0.31978679  | Proteobacteria | Proteobacteria        |
| Actinobacteria     | Rathayibacter        | 0.072679127 | 0.122730081 | Actinobacteria | Actinobacteria        |
| Frischella         | Mycoplasma           | 0.025477347 | 0.043002703 | Proteobacteria | Tenericutes           |
| Sodalis            | Tatumella            | 0.189313104 | 0.319177657 | Proteobacteria | Proteobacteria        |
| Chlorobium         | Prosthecochloris     | 0.269516596 | 0.454248031 | Bacteroidetes  | Bacteroidetes         |
| Lachnoclostridium  | Roseburia            | 0.132857063 | 0.223897095 | Firmicutes     | Firmicutes            |
| Faecalibacterium   | Eubacterium          | 0.078449324 | 0.132059753 | Firmicutes     | Firmicutes            |
| Terribacillus      | Clostridium          | 0.062850588 | 0.105744749 | Firmicutes     | Firmicutes            |
| Mycoplasma         | Bartonella           | 0.025477347 | 0.042831883 | Tenericutes    | Proteobacteria        |
| Blautia            | Mycoplasma           | 0.025477347 | 0.042831608 | Firmicutes     | Tenericutes           |
| Collimonas         | Pseudomonas          | 0.175575691 | 0.295121963 | Proteobacteria | Proteobacteria        |
| Gilliamella        | Mycoplasma           | 0.025477347 | 0.042764658 | Proteobacteria | Tenericutes           |
| Blautia            | Lachnoclostridium    | 0.132857063 | 0.222893437 | Firmicutes     | Firmicutes            |
| Neomicrococcus     | Brevibacterium       | 0.125961995 | 0.211316674 | Actinobacteria | Actinobacteria        |
| Bacillus           | Lentibacillus        | 0.132343801 | 0.221997209 | Firmicutes     | Firmicutes            |
| Erysipelothrix     | Clostridium          | 0.062850588 | 0.105401675 | Firmicutes     | Firmicutes            |
| Mycoplasma         | Thermodesulfobium    | 0.025477347 | 0.042673509 | Tenericutes    | Firmicutes            |
| Clostridium        | Pediococcus          | 0.062850588 | 0.105200105 | Firmicutes     | Firmicutes            |
| Sporosarcina       | Clostridium          | 0.062850588 | 0.105194804 | Firmicutes     | Firmicutes            |
| Renibacterium      | Actinobacteria       | 0.072679127 | 0.121447344 | Actinobacteria | Actinobacteria        |
| Bacillus           | Salimicrobium        | 0.132343801 | 0.221119042 | Firmicutes     | Firmicutes            |

|                      |                   |             |             |                |                |
|----------------------|-------------------|-------------|-------------|----------------|----------------|
| Coxiella             | Coxiella-like     | 0.263574886 | 0.439951348 | Proteobacteria | Proteobacteria |
| Desulfohalobium      | Desulfovibrio     | 0.143678238 | 0.239814788 | Proteobacteria | Proteobacteria |
| Mycoplasma           | Liberibacter      | 0.025477347 | 0.04240628  | Tenericutes    | Proteobacteria |
| Eubacterium          | Parvimonas        | 0.078449324 | 0.130353622 | Firmicutes     | Firmicutes     |
| Pseudomonas          | Variovorax        | 0.175575691 | 0.291723605 | Proteobacteria | Proteobacteria |
| Dermacoccus          | Brevibacterium    | 0.125961995 | 0.209091219 | Actinobacteria | Actinobacteria |
| Rickettsiales        | Mycoplasma        | 0.025477347 | 0.042277415 | Proteobacteria | Tenericutes    |
| Eubacterium          | Ruminococcus      | 0.078449324 | 0.129980695 | Firmicutes     | Firmicutes     |
| Vagococcus           | Lactobacillus     | 0.158222465 | 0.262084489 | Firmicutes     | Firmicutes     |
| Dermatophilus        | Actinobacteria    | 0.072679127 | 0.120335771 | Actinobacteria | Actinobacteria |
| Corynebacterium      | Actinobacteria    | 0.072679127 | 0.120127625 | Actinobacteria | Actinobacteria |
| Leifsonia            | Brevibacterium    | 0.125961995 | 0.20770773  | Actinobacteria | Actinobacteria |
| Janibacter           | Actinobacteria    | 0.072679127 | 0.119829801 | Actinobacteria | Actinobacteria |
| Clavibacter          | Brevibacterium    | 0.125961995 | 0.207589607 | Actinobacteria | Actinobacteria |
| Actinobacteria       | Cutibacterium     | 0.072679127 | 0.119757454 | Actinobacteria | Actinobacteria |
| Sulfurihydrogenibium | Clostridium       | 0.062850588 | 0.103514614 | Aquificae      | Firmicutes     |
| Carnobacterium       | Lactobacillus     | 0.158222465 | 0.26035462  | Firmicutes     | Firmicutes     |
| Mycoplasma           | Tepidanaerobacter | 0.025477347 | 0.041881649 | Tenericutes    | Firmicutes     |
| Lactobacillus        | Melissococcus     | 0.158222465 | 0.260068326 | Firmicutes     | Firmicutes     |
| Mycoplasma           | Flavobacterium    | 0.025477347 | 0.041814122 | Tenericutes    | Bacteroidetes  |
| Glaciecola           | Pseudoalteromonas | 0.161098934 | 0.263984039 | Proteobacteria | Proteobacteria |
| Heliobacterium       | Clostridium       | 0.062850588 | 0.102968879 | Firmicutes     | Firmicutes     |
| Aerococcus           | Clostridium       | 0.062850588 | 0.102826216 | Firmicutes     | Firmicutes     |
| Mycoplasma           | Hipaea            | 0.025477347 | 0.041647728 | Tenericutes    | Proteobacteria |
| Agromyces            | Brevibacterium    | 0.125961995 | 0.205841682 | Actinobacteria | Actinobacteria |
| Leifsonia            | Actinobacteria    | 0.072679127 | 0.118714204 | Actinobacteria | Actinobacteria |
| Syntrophomonas       | Clostridium       | 0.062850588 | 0.102611844 | Firmicutes     | Firmicutes     |
| Gottschalkia         | Eubacterium       | 0.078449324 | 0.12796072  | Firmicutes     | Firmicutes     |
| Aneurinibacillus     | Clostridium       | 0.062850588 | 0.102461527 | Firmicutes     | Firmicutes     |
| Phoenicibacter       | Mycoplasma        | 0.025477347 | 0.041431374 | Actinobacteria | Tenericutes    |
| Arthrobacter         | Brevibacterium    | 0.125961995 | 0.204769382 | Actinobacteria | Actinobacteria |
| Halobacillus         | Clostridium       | 0.062850588 | 0.101969603 | Firmicutes     | Firmicutes     |
| Lacimicrobium        | Pseudoalteromonas | 0.164337017 | 0.266546796 | Proteobacteria | Proteobacteria |
| Bacillus             | Staphylococcus    | 0.132343801 | 0.214450372 | Firmicutes     | Firmicutes     |

|                    |                      |             |             |                |                |
|--------------------|----------------------|-------------|-------------|----------------|----------------|
| Clostridium        | Paenibacillus        | 0.062850588 | 0.101839923 | Firmicutes     | Firmicutes     |
| Comamonas          | Delftia              | 0.306827503 | 0.49709349  | Proteobacteria | Proteobacteria |
| Acetoanaerobium    | Eubacterium          | 0.078449324 | 0.127002288 | Firmicutes     | Firmicutes     |
| Actinobacteria     | Propionibacterium    | 0.072679127 | 0.11732634  | Actinobacteria | Actinobacteria |
| Brevibacillus      | Bacillus             | 0.132343801 | 0.213231342 | Firmicutes     | Firmicutes     |
| Brevibacterium     | Cryobacterium        | 0.125961995 | 0.202790682 | Actinobacteria | Actinobacteria |
| Histophilus        | Serratia             | 0.093374951 | 0.15028029  | Proteobacteria | Proteobacteria |
| Dichelobacter      | Mycoplasma           | 0.025477347 | 0.040949236 | Proteobacteria | Tenericutes    |
| Paenarthrobacter   | Brevibacterium       | 0.125961995 | 0.202417632 | Actinobacteria | Actinobacteria |
| Clostridioides     | Eubacterium          | 0.078449324 | 0.125939012 | Firmicutes     | Firmicutes     |
| Bacillus           | Amphibacillus        | 0.132343801 | 0.2124237   | Firmicutes     | Firmicutes     |
| Kytococcus         | Brevibacterium       | 0.125961995 | 0.201968538 | Actinobacteria | Actinobacteria |
| Mycoplasma         | Halobacillus         | 0.025477347 | 0.040817048 | Tenericutes    | Firmicutes     |
| Eubacterium        | Thermoanaerobacteriu | 0.078449324 | 0.125203704 | Firmicutes     | Firmicutes     |
| Halomonas          | Pseudomonas          | 0.175575691 | 0.279941239 | Proteobacteria | Proteobacteria |
| Lutibacter         | Flavobacteriaceae    | 0.161380659 | 0.257093349 | Bacteroidetes  | Bacteroidetes  |
| Paraphotobacterium | Serratia             | 0.093374951 | 0.148444626 | Proteobacteria | Proteobacteria |
| Eubacterium        | Thermoanaerobacter   | 0.078449324 | 0.124500272 | Firmicutes     | Firmicutes     |
| Bacillus           | Paenibacillus        | 0.132343801 | 0.209984491 | Firmicutes     | Firmicutes     |
| Tetragenococcus    | Lactobacillus        | 0.158222465 | 0.250900318 | Firmicutes     | Firmicutes     |
| Xylanimonas        | Brevibacterium       | 0.125961995 | 0.199353453 | Actinobacteria | Actinobacteria |
| Curtobacterium     | Brevibacterium       | 0.125961995 | 0.199121515 | Actinobacteria | Actinobacteria |
| Thermobispora      | Actinobacteria       | 0.072679127 | 0.114885073 | Actinobacteria | Actinobacteria |
| Alkaliphilus       | Eubacterium          | 0.078449324 | 0.123846531 | Firmicutes     | Firmicutes     |
| Bacillus           | Exiguobacterium      | 0.132343801 | 0.208709461 | Firmicutes     | Firmicutes     |
| Thermobifida       | Actinobacteria       | 0.072679127 | 0.114571366 | Actinobacteria | Actinobacteria |
| Halotalea          | Pseudomonas          | 0.175575691 | 0.276582709 | Proteobacteria | Proteobacteria |
| Actinobacteria     | Isophtericola        | 0.072679127 | 0.114369111 | Actinobacteria | Actinobacteria |
| Mycoplasma         | Lutibacter           | 0.025477347 | 0.039912982 | Tenericutes    | Bacteroidetes  |
| Peptoclostridium   | Eubacterium          | 0.078449324 | 0.12286954  | Firmicutes     | Firmicutes     |
| Intrasporangium    | Brevibacterium       | 0.125961995 | 0.197215641 | Actinobacteria | Actinobacteria |
| Mycoplasma         | Lentibacillus        | 0.025477347 | 0.039870249 | Tenericutes    | Firmicutes     |
| Massilia           | Pseudomonas          | 0.175575691 | 0.274710086 | Proteobacteria | Proteobacteria |
| Cellulosimicrobium | Brevibacterium       | 0.125961995 | 0.197064684 | Actinobacteria | Actinobacteria |

|                     |                   |             |             |                 |                |
|---------------------|-------------------|-------------|-------------|-----------------|----------------|
| Sanguibacter        | Brevibacterium    | 0.125961995 | 0.196765709 | Actinobacteria  | Actinobacteria |
| Clostridium         | Megasphaera       | 0.062850588 | 0.09817325  | Firmicutes      | Firmicutes     |
| Bacillus            | Aneurinibacillus  | 0.132343801 | 0.206446506 | Firmicutes      | Firmicutes     |
| Aeromicrobium       | Actinobacteria    | 0.072679127 | 0.113317464 | Actinobacteria  | Actinobacteria |
| Mycoplasma          | Mannheimia        | 0.025477347 | 0.039716057 | Tenericutes     | Proteobacteria |
| Arcanobacterium     | Actinobacteria    | 0.072679127 | 0.113204361 | Actinobacteria  | Actinobacteria |
| Intrasporangium     | Actinobacteria    | 0.072679127 | 0.112903283 | Actinobacteria  | Actinobacteria |
| Moritella           | Serratia          | 0.093950708 | 0.145936939 | Proteobacteria  | Proteobacteria |
| Clostridium         | Fervidobacterium  | 0.062850588 | 0.097552384 | Firmicutes      | Thermotogae    |
| Actinobacteria      | Micrococcus       | 0.072679127 | 0.112787558 | Actinobacteria  | Actinobacteria |
| Methanothermococcus | Methanococcus     | 0.360893548 | 0.559991956 | Euryarchaeota   | Euryarchaeota  |
| Erysipelotrichaceae | Clostridium       | 0.062850588 | 0.097506784 | Firmicutes      | Firmicutes     |
| Brevibacterium      | Cnuibacter        | 0.125961995 | 0.195269636 | Actinobacteria  | Actinobacteria |
| Mycoplasma          | Salimicrobium     | 0.025477347 | 0.039473801 | Tenericutes     | Firmicutes     |
| Mycoplasma          | Flavobacteriaceae | 0.025477347 | 0.039447403 | Tenericutes     | Bacteroidetes  |
| Sodalis             | Morganella        | 0.189313104 | 0.292951154 | Proteobacteria  | Proteobacteria |
| Finegoldia          | Eubacterium       | 0.078449324 | 0.121324913 | Firmicutes      | Firmicutes     |
| Mycoplasma          | Faecalibaculum    | 0.025477347 | 0.039348231 | Tenericutes     | Firmicutes     |
| Anaerotignum        | Mycoplasma        | 0.025477347 | 0.039335888 | Firmicutes      | Tenericutes    |
| Calditerrivibrio    | Mycoplasma        | 0.025477347 | 0.039313    | Deferribacteres | Tenericutes    |
| Cellulomonas        | Brevibacterium    | 0.125961995 | 0.194252187 | Actinobacteria  | Actinobacteria |
| Rhizobacter         | Pseudomonas       | 0.175575691 | 0.270595234 | Proteobacteria  | Proteobacteria |
| Zobellella          | Pseudomonas       | 0.175575691 | 0.270591992 | Proteobacteria  | Proteobacteria |
| Negativicoccus      | Mycoplasma        | 0.025477347 | 0.039130801 | Firmicutes      | Tenericutes    |
| Treponema           | Spirochaeta       | 0.076369812 | 0.117289981 | Spirochaetes    | Spirochaetes   |
| Microcella          | Brevibacterium    | 0.125961995 | 0.193249558 | Actinobacteria  | Actinobacteria |
| Kineococcus         | Brevibacterium    | 0.125961995 | 0.193198945 | Actinobacteria  | Actinobacteria |
| Flavobacteriaceae   | Tenacibaculum     | 0.161380659 | 0.247131813 | Bacteroidetes   | Bacteroidetes  |
| Flavobacteriaceae   | Lacinutrix        | 0.161380659 | 0.247090611 | Bacteroidetes   | Bacteroidetes  |
| Weeksella           | Mycoplasma        | 0.025477347 | 0.038911555 | Bacteroidetes   | Tenericutes    |
| Brachyspira         | Clostridium       | 0.068824019 | 0.105089696 | Spirochaetes    | Firmicutes     |
| Ilumatobacter       | Actinobacteria    | 0.072679127 | 0.110694553 | Actinobacteria  | Actinobacteria |
| Actinomyces         | Brevibacterium    | 0.125961995 | 0.191770093 | Actinobacteria  | Actinobacteria |
| Enterococcus        | Lactobacillus     | 0.158222465 | 0.24068499  | Firmicutes      | Firmicutes     |

|                   |                    |             |             |                |                |
|-------------------|--------------------|-------------|-------------|----------------|----------------|
| Mycoplasma        | Salinicoccus       | 0.025477347 | 0.038737093 | Tenericutes    | Firmicutes     |
| Dietzia           | Corynebacterium    | 0.177688971 | 0.270115664 | Actinobacteria | Actinobacteria |
| Kocuria           | Actinobacteria     | 0.072679127 | 0.110467095 | Actinobacteria | Actinobacteria |
| Bacillus          | Listeria           | 0.132343801 | 0.200583575 | Firmicutes     | Firmicutes     |
| Berkelbacteria    | Mycoplasma         | 0.025477347 | 0.038603031 | null           | Tenericutes    |
| Achromobacter     | Pseudomonas        | 0.175575691 | 0.26602314  | Proteobacteria | Proteobacteria |
| Rothia            | Actinobacteria     | 0.072679127 | 0.110054027 | Actinobacteria | Actinobacteria |
| Desulfotomaculum  | Pelotomaculum      | 0.198423348 | 0.300368461 | Firmicutes     | Firmicutes     |
| Chromohalobacter  | Pseudomonas        | 0.175575691 | 0.26529852  | Proteobacteria | Proteobacteria |
| Rhodococcus       | Brevibacterium     | 0.125961995 | 0.190224253 | Actinobacteria | Actinobacteria |
| Arcobacter        | Clostridium        | 0.062850588 | 0.094852418 | Proteobacteria | Firmicutes     |
| Dermabacter       | Actinobacteria     | 0.072679127 | 0.109633846 | Actinobacteria | Actinobacteria |
| Geosporobacter    | Eubacterium        | 0.078449324 | 0.118245747 | Firmicutes     | Firmicutes     |
| Escherichia       | synthetic          | 0.662579626 | 0.997637044 | Proteobacteria | Proteobacteria |
| Agrobacterium     | Rhizobium          | 0.368942819 | 0.55508118  | Proteobacteria | Proteobacteria |
| Treponema         | Salinispira        | 0.076369812 | 0.114837532 | Spirochaetes   | Spirochaetes   |
| Pelotomaculum     | Clostridium        | 0.062850588 | 0.094466116 | Firmicutes     | Firmicutes     |
| Acidovorax        | Pseudomonas        | 0.175575691 | 0.263386858 | Proteobacteria | Proteobacteria |
| Dietzia           | Brevibacterium     | 0.125961995 | 0.188675998 | Actinobacteria | Actinobacteria |
| Mycoplasma        | Endomicrobium      | 0.025477347 | 0.038138026 | Tenericutes    | Elusimicrobia  |
| Actinobacteria    | Clavibacter        | 0.072679127 | 0.108779247 | Actinobacteria | Actinobacteria |
| Peptoclostridium  | Mycoplasma         | 0.025477347 | 0.038120393 | Firmicutes     | Tenericutes    |
| Eubacterium       | Ruminiclostridium  | 0.078449324 | 0.117350208 | Firmicutes     | Firmicutes     |
| Clostridium       | Salimicrobium      | 0.062850588 | 0.093976588 | Firmicutes     | Firmicutes     |
| Erythrobacter     | Altererythrobacter | 0.319203322 | 0.477016621 | Proteobacteria | Proteobacteria |
| Mycoplasma        | Actinobacillus     | 0.025477347 | 0.038061584 | Tenericutes    | Proteobacteria |
| Eubacterium       | Flavonifractor     | 0.078449324 | 0.117197089 | Firmicutes     | Firmicutes     |
| Lachnoclostridium | Mycoplasma         | 0.025477347 | 0.038027077 | Firmicutes     | Tenericutes    |
| Thermodesulfobium | Clostridium        | 0.062850588 | 0.093715739 | Firmicutes     | Firmicutes     |
| Rathayibacter     | Brevibacterium     | 0.125961995 | 0.187658179 | Actinobacteria | Actinobacteria |
| Actinobacteria    | Cellulomonas       | 0.072679127 | 0.108238115 | Actinobacteria | Actinobacteria |
| Mycoplasma        | Sebaldella         | 0.025477347 | 0.037901224 | Tenericutes    | Fusobacteria   |
| Thermococcus      | Palaeococcus       | 0.351634878 | 0.522811522 | Euryarchaeota  | Euryarchaeota  |
| Mycoplasma        | Bibersteinia       | 0.025477347 | 0.03785587  | Tenericutes    | Proteobacteria |



|                   |                    |             |             |                |                |
|-------------------|--------------------|-------------|-------------|----------------|----------------|
| Shewanella        | Pseudoalteromonas  | 0.161098934 | 0.239194878 | Proteobacteria | Proteobacteria |
| Geobacillus       | Mycoplasma         | 0.025477347 | 0.037785601 | Firmicutes     | Tenericutes    |
| Achromobacter     | Bordetella         | 0.361544995 | 0.536155965 | Proteobacteria | Proteobacteria |
| Actinobacillus    | Haemophilus        | 0.356592956 | 0.52873453  | Proteobacteria | Proteobacteria |
| Mycoplasma        | Aneurinibacillus   | 0.025477347 | 0.037773097 | Tenericutes    | Firmicutes     |
| Bacillus          | Macrococcus        | 0.132343801 | 0.195961754 | Firmicutes     | Firmicutes     |
| Actinomyces       | Actinobacteria     | 0.072679127 | 0.107504174 | Actinobacteria | Actinobacteria |
| Hippea            | Clostridium        | 0.062850588 | 0.092936601 | Proteobacteria | Firmicutes     |
| Bacillus          | Brochothrix        | 0.132343801 | 0.195576364 | Firmicutes     | Firmicutes     |
| Actinobacillus    | Mannheimia         | 0.384896686 | 0.568171296 | Proteobacteria | Proteobacteria |
| Geobacter         | Pelobacter         | 0.212486283 | 0.313660732 | Proteobacteria | Proteobacteria |
| Tessaracoccus     | Actinobacteria     | 0.072679127 | 0.107276707 | Actinobacteria | Actinobacteria |
| Lentibacillus     | Clostridium        | 0.062850588 | 0.092725668 | Firmicutes     | Firmicutes     |
| Haemophilus       | Aggregatibacter    | 0.356592956 | 0.525645469 | Proteobacteria | Proteobacteria |
| Colwellia         | Pseudoalteromonas  | 0.161098934 | 0.237454402 | Proteobacteria | Proteobacteria |
| Janthinobacterium | Pseudomonas        | 0.175575691 | 0.258771654 | Proteobacteria | Proteobacteria |
| Mycobacterium     | Rhodococcus        | 0.255167927 | 0.375829427 | Actinobacteria | Actinobacteria |
| Raoultella        | Klebsiella         | 0.459467233 | 0.676632627 | Proteobacteria | Proteobacteria |
| Mycoplasma        | Desulfitobacterium | 0.025477347 | 0.037497377 | Tenericutes    | Firmicutes     |
| Glutamicibacter   | Actinobacteria     | 0.072679127 | 0.10690643  | Actinobacteria | Actinobacteria |
| Pseudomonas       | Rubrivivax         | 0.175575691 | 0.258142303 | Proteobacteria | Proteobacteria |
| Campylobacter     | Arcobacter         | 0.172715367 | 0.253869809 | Proteobacteria | Proteobacteria |
| Mycoplasma        | Carboxydotherrmus  | 0.025477347 | 0.037429622 | Tenericutes    | Firmicutes     |
| Geobacillus       | Clostridium        | 0.062850588 | 0.092303835 | Firmicutes     | Firmicutes     |
| Leuconostoc       | Lactobacillus      | 0.158222465 | 0.232334122 | Firmicutes     | Firmicutes     |
| Thermobacillus    | Clostridium        | 0.062850588 | 0.092272332 | Firmicutes     | Firmicutes     |
| Actinobacteria    | Nocardioidea       | 0.072679127 | 0.10664891  | Actinobacteria | Actinobacteria |
| Rhodococcus       | Corynebacterium    | 0.177688971 | 0.260419229 | Actinobacteria | Actinobacteria |
| Delftia           | Pseudomonas        | 0.175575691 | 0.257245366 | Proteobacteria | Proteobacteria |
| Actinobacteria    | Trueperella        | 0.072679127 | 0.106184548 | Actinobacteria | Actinobacteria |
| Borrelia          | Borrelia           | 0.685713958 | 0.999872023 | Spirochaetes   | Spirochaetes   |
| Polaribacter      | Flavobacteriaceae  | 0.161380659 | 0.235121754 | Bacteroidetes  | Bacteroidetes  |
| Beutenbergia      | Brevibacterium     | 0.125961995 | 0.183437073 | Actinobacteria | Actinobacteria |
| Anaerococcus      | Eubacterium        | 0.078449324 | 0.11375791  | Firmicutes     | Firmicutes     |

|                        |                      |             |             |                |                |
|------------------------|----------------------|-------------|-------------|----------------|----------------|
| Paraburkholderia       | Pandora              | 0.232579852 | 0.336960041 | Proteobacteria | Proteobacteria |
| Mycoplasma             | Pseudothermotoga     | 0.025477347 | 0.036877759 | Tenericutes    | Thermotogae    |
| Idiomarina             | Pseudoalteromonas    | 0.161098934 | 0.232957064 | Proteobacteria | Proteobacteria |
| Mycoplasma             | Lacinutrix           | 0.025477347 | 0.036820784 | Tenericutes    | Bacteroidetes  |
| Mycoplasma             | Gallibacterium       | 0.025477347 | 0.036793308 | Tenericutes    | Proteobacteria |
| Modestobacter          | Brevibacterium       | 0.125961995 | 0.181302218 | Actinobacteria | Actinobacteria |
| Christensenella        | Eubacterium          | 0.078449324 | 0.112894712 | Firmicutes     | Firmicutes     |
| Pseudarthrobacter      | Actinobacteria       | 0.072679127 | 0.104483633 | Actinobacteria | Actinobacteria |
| Bordetella             | Pseudomonas          | 0.175575691 | 0.25233918  | Proteobacteria | Proteobacteria |
| Alcanivorax            | Pseudomonas          | 0.175575691 | 0.252085346 | Proteobacteria | Proteobacteria |
| Actinobacteria         | Microterricola       | 0.072679127 | 0.104285706 | Actinobacteria | Actinobacteria |
| Syntrophothermus       | Clostridium          | 0.062850588 | 0.090141241 | Firmicutes     | Firmicutes     |
| Mycoplasma             | Tumebacillus         | 0.025477347 | 0.036518739 | Tenericutes    | Firmicutes     |
| Sulfurospirillum       | Campylobacter        | 0.172965651 | 0.247846562 | Proteobacteria | Proteobacteria |
| Xylanimonas            | Actinobacteria       | 0.072679127 | 0.104111799 | Actinobacteria | Actinobacteria |
| Siansivirga            | Flavobacteriaceae    | 0.161380659 | 0.231092809 | Bacteroidetes  | Bacteroidetes  |
| Brevibacterium         | Streptomyces         | 0.125961995 | 0.180062712 | Actinobacteria | Actinobacteria |
| Devriesea              | Actinobacteria       | 0.072679127 | 0.103814273 | Actinobacteria | Actinobacteria |
| Kytococcus             | Actinobacteria       | 0.072679127 | 0.103763713 | Actinobacteria | Actinobacteria |
| Castellaniella         | Pseudomonas          | 0.175575691 | 0.250519384 | Proteobacteria | Proteobacteria |
| Acidipropionibacterium | Propionibacterium    | 0.255521499 | 0.364496262 | Actinobacteria | Actinobacteria |
| Thermacetogenium       | Clostridium          | 0.062850588 | 0.089639542 | Firmicutes     | Firmicutes     |
| Rhodospirillum         | Pararhodospirillum   | 0.265465699 | 0.37845423  | Proteobacteria | Proteobacteria |
| Eubacterium            | Caldicellulosiruptor | 0.078449324 | 0.111787728 | Firmicutes     | Firmicutes     |
| Thalassotalea          | Pseudoalteromonas    | 0.161098934 | 0.229435065 | Proteobacteria | Proteobacteria |
| Sodalis                | Pragia               | 0.189313104 | 0.269325047 | Proteobacteria | Proteobacteria |
| Actinobacteria         | Arthrobacter         | 0.072679127 | 0.103371417 | Actinobacteria | Actinobacteria |
| Oblitimonas            | Pseudomonas          | 0.175575691 | 0.249230189 | Proteobacteria | Proteobacteria |
| Marinobacter           | Pseudomonas          | 0.175575691 | 0.248922825 | Proteobacteria | Proteobacteria |
| Mycoplasma             | Sulfurimonas         | 0.025477347 | 0.036093317 | Tenericutes    | Proteobacteria |
| Alicyclophilus         | Pseudomonas          | 0.175575691 | 0.248719903 | Proteobacteria | Proteobacteria |
| Megamonas              | Eubacterium          | 0.078449324 | 0.110966528 | Firmicutes     | Firmicutes     |
| Brevibacillus          | Mycoplasma           | 0.025477347 | 0.036030589 | Firmicutes     | Tenericutes    |
| Weissella              | Clostridium          | 0.062850588 | 0.088854726 | Firmicutes     | Firmicutes     |

|                        |                   |             |             |                |                       |
|------------------------|-------------------|-------------|-------------|----------------|-----------------------|
| Anaerostipes           | Lachnoclostridium | 0.132857063 | 0.187814787 | Firmicutes     | Firmicutes            |
| Caldanaerobacter       | Eubacterium       | 0.078449324 | 0.11089832  | Firmicutes     | Firmicutes            |
| Persephonella          | Clostridium       | 0.062850588 | 0.088760305 | Aquificae      | Firmicutes            |
| Flavobacteriaceae      | Cellulophaga      | 0.161380659 | 0.227650437 | Bacteroidetes  | Bacteroidetes         |
| Actinobacteria         | Microbacterium    | 0.072679127 | 0.102485571 | Actinobacteria | Actinobacteria        |
| Azoarcus               | Pseudomonas       | 0.175575691 | 0.246777416 | Proteobacteria | Proteobacteria        |
| Sodalis                | Xenorhabdus       | 0.189313104 | 0.265986342 | Proteobacteria | Proteobacteria        |
| Christensenella        | Clostridium       | 0.062850588 | 0.088242814 | Firmicutes     | Firmicutes            |
| Mycoplasma             | Polaribacter      | 0.025477347 | 0.035745439 | Tenericutes    | Bacteroidetes         |
| Chromobacterium        | Pseudomonas       | 0.175575691 | 0.246299394 | Proteobacteria | Proteobacteria        |
| Exiguobacterium        | Clostridium       | 0.062850588 | 0.088131012 | Firmicutes     | Firmicutes            |
| Tatlockia              | Legionella        | 0.280731876 | 0.393534822 | Proteobacteria | Proteobacteria        |
| Comamonas              | Acidovorax        | 0.306827503 | 0.430029976 | Proteobacteria | Proteobacteria        |
| Acetobacterium         | Mycoplasma        | 0.025477347 | 0.035692934 | Firmicutes     | Tenericutes           |
| Porphyrobacter         | Erythrobacter     | 0.338583594 | 0.474322565 | Proteobacteria | Proteobacteria        |
| Marinobacterium        | Pseudomonas       | 0.175575691 | 0.245926988 | Proteobacteria | Proteobacteria        |
| Clostridium            | Lawsonia          | 0.063423572 | 0.08883293  | Firmicutes     | Proteobacteria        |
| Leuconostoc            | Clostridium       | 0.062850588 | 0.087981204 | Firmicutes     | Firmicutes            |
| Methylibium            | Pseudomonas       | 0.175575691 | 0.245506439 | Proteobacteria | Proteobacteria        |
| Paraburkholderia       | Cupriavidus       | 0.232579852 | 0.325134225 | Proteobacteria | Proteobacteria        |
| Weeksella              | Flavobacteriaceae | 0.161380659 | 0.225568026 | Bacteroidetes  | Bacteroidetes         |
| Paenarthrobacter       | Actinobacteria    | 0.072679127 | 0.101566914 | Actinobacteria | Actinobacteria        |
| Acidipropionibacterium | Brevibacterium    | 0.125961995 | 0.175712631 | Actinobacteria | Actinobacteria        |
| Treponema              | Sphaerochaeta     | 0.076369812 | 0.10649538  | Spirochaetes   | Spirochaetes          |
| Mycoplasma             | Caldimicrobium    | 0.025477347 | 0.035504456 | Tenericutes    | Thermodesulfobacteria |
| Acidaminococcus        | Clostridium       | 0.062850588 | 0.087535159 | Firmicutes     | Firmicutes            |
| Cobetia                | Pseudomonas       | 0.175575691 | 0.244250886 | Proteobacteria | Proteobacteria        |
| Basilea                | Mycoplasma        | 0.025477347 | 0.035433338 | Proteobacteria | Tenericutes           |
| Pasteurella            | Haemophilus       | 0.356592956 | 0.495849295 | Proteobacteria | Proteobacteria        |
| Photobacterium         | Vibrio            | 0.271195069 | 0.376739209 | Proteobacteria | Proteobacteria        |
| Jeotgalibaca           | Lactobacillus     | 0.158222465 | 0.219712615 | Firmicutes     | Firmicutes            |
| Bacillus               | Novibacillus      | 0.132343801 | 0.183700264 | Firmicutes     | Firmicutes            |
| Mycobacterium          | Nocardia          | 0.255167927 | 0.353993054 | Actinobacteria | Actinobacteria        |
| Actinobacteria         | Acidimicrobium    | 0.072679127 | 0.100791448 | Actinobacteria | Actinobacteria        |

|                  |                   |             |             |                |                |
|------------------|-------------------|-------------|-------------|----------------|----------------|
| Brevibacterium   | Nocardiopsis      | 0.125961995 | 0.174255274 | Actinobacteria | Actinobacteria |
| Riemerella       | Mycoplasma        | 0.025477347 | 0.035236872 | Bacteroidetes  | Tenericutes    |
| Bibersteinia     | Mannheimia        | 0.384896686 | 0.532239386 | Proteobacteria | Proteobacteria |
| Xanthomonas      | Stenotrophomonas  | 0.330541251 | 0.456387654 | Proteobacteria | Proteobacteria |
| Haemophilus      | Mannheimia        | 0.356592956 | 0.492106189 | Proteobacteria | Proteobacteria |
| Moorella         | Clostridium       | 0.062850588 | 0.08665908  | Firmicutes     | Firmicutes     |
| Paraburkholderia | Ralstonia         | 0.232579852 | 0.320340866 | Proteobacteria | Proteobacteria |
| Sporosarcina     | Lysinibacillus    | 0.284988147 | 0.392131991 | Firmicutes     | Firmicutes     |
| Mycoplasma       | Helicobacter      | 0.025477347 | 0.035031196 | Tenericutes    | Proteobacteria |
| Mycoplasma       | Siansivirga       | 0.025477347 | 0.034994452 | Tenericutes    | Bacteroidetes  |
| Alicyclophilus   | Comamonas         | 0.306827503 | 0.42112668  | Proteobacteria | Proteobacteria |
| Leptothrix       | Pseudomonas       | 0.175575691 | 0.240846387 | Proteobacteria | Proteobacteria |
| Clostridium      | Spiroplasma       | 0.062850588 | 0.086209942 | Firmicutes     | Tenericutes    |
| Serratia         | Pseudoalteromonas | 0.093950708 | 0.128750823 | Proteobacteria | Proteobacteria |
| Kushneria        | Pseudomonas       | 0.175575691 | 0.24056274  | Proteobacteria | Proteobacteria |
| Kocuria          | Corynebacterium   | 0.201379737 | 0.275900753 | Actinobacteria | Actinobacteria |
| Sanguibacter     | Actinobacteria    | 0.072679127 | 0.099538999 | Actinobacteria | Actinobacteria |
| Bacillus         | Salinicoccus      | 0.132343801 | 0.181205095 | Firmicutes     | Firmicutes     |
| Mycoplasma       | Geosporobacter    | 0.025477347 | 0.034865396 | Tenericutes    | Firmicutes     |
| Flavobacterium   | Flavobacteriaceae | 0.161380659 | 0.220744555 | Bacteroidetes  | Bacteroidetes  |
| Actinobacteria   | Brevibacterium    | 0.072679127 | 0.0991609   | Actinobacteria | Actinobacteria |
| Cyanobium        | Prochlorococcus   | 0.216386652 | 0.295032518 | Cyanobacteria  | Cyanobacteria  |
| Bibersteinia     | Haemophilus       | 0.356592956 | 0.485451493 | Proteobacteria | Proteobacteria |
| Rhodococcus      | Nocardia          | 0.313040186 | 0.425800527 | Actinobacteria | Actinobacteria |
| Thauera          | Pseudomonas       | 0.175575691 | 0.238440028 | Proteobacteria | Proteobacteria |
| Polyangium       | Pseudomonas       | 0.175575691 | 0.238422811 | Proteobacteria | Proteobacteria |
| Campylobacter    | Clostridium       | 0.062850588 | 0.085046346 | Proteobacteria | Firmicutes     |
| Xanthomonas      | Pseudoxanthomonas | 0.330541251 | 0.447010634 | Proteobacteria | Proteobacteria |
| Wolinella        | Helicobacter      | 0.162576286 | 0.219557176 | Proteobacteria | Proteobacteria |
| Diaphorobacter   | Comamonas         | 0.306827503 | 0.414317764 | Proteobacteria | Proteobacteria |
| Bacillus         | Auricoccus        | 0.132343801 | 0.178547788 | Firmicutes     | Firmicutes     |
| Clostridium      | Endomicrobium     | 0.063423572 | 0.085532933 | Firmicutes     | Elusimicrobia  |
| Actinobacteria   | Mobiluncus        | 0.072679127 | 0.097943194 | Actinobacteria | Actinobacteria |
| Mesoplasma       | Clostridium       | 0.062850588 | 0.084465183 | Tenericutes    | Firmicutes     |

|                    |                    |             |             |                 |                |
|--------------------|--------------------|-------------|-------------|-----------------|----------------|
| Stenotrophomonas   | Pseudomonas        | 0.175575691 | 0.23581169  | Proteobacteria  | Proteobacteria |
| Ramlibacter        | Pseudomonas        | 0.175575691 | 0.235567586 | Proteobacteria  | Proteobacteria |
| Paraphotobacterium | Clostridium        | 0.062850588 | 0.0841907   | Proteobacteria  | Firmicutes     |
| Bacillus           | Carnobacterium     | 0.132343801 | 0.177125052 | Firmicutes      | Firmicutes     |
| Calditerrivibrio   | Clostridium        | 0.062850588 | 0.0840818   | Deferribacteres | Firmicutes     |
| Gordonia           | Mycobacterium      | 0.255167927 | 0.340634265 | Actinobacteria  | Actinobacteria |
| Acetohalobium      | Eubacterium        | 0.078449324 | 0.104642045 | Firmicutes      | Firmicutes     |
| Mycoplasma         | Desulfotomaculum   | 0.025477347 | 0.033977022 | Tenericutes     | Firmicutes     |
| Eubacterium        | Ruminococcaceae    | 0.078449324 | 0.104573601 | Firmicutes      | Firmicutes     |
| Actinobacteria     | Tropheryma         | 0.072679127 | 0.096779004 | Actinobacteria  | Actinobacteria |
| Renibacterium      | Brevibacterium     | 0.125961995 | 0.167591308 | Actinobacteria  | Actinobacteria |
| Intestinimonas     | Eubacterium        | 0.088134527 | 0.117233285 | Firmicutes      | Firmicutes     |
| Mycoplasma         | Wenyingzhuangia    | 0.025477347 | 0.033842977 | Tenericutes     | Bacteroidetes  |
| Escherichia        | Shigella           | 0.662579626 | 0.87900418  | Proteobacteria  | Proteobacteria |
| Eubacterium        | Paenibacillus      | 0.078449324 | 0.104046715 | Firmicutes      | Firmicutes     |
| Mycoplasma         | Aggregatibacter    | 0.025477347 | 0.033769422 | Tenericutes     | Proteobacteria |
| Blastococcus       | Actinobacteria     | 0.072679127 | 0.096321865 | Actinobacteria  | Actinobacteria |
| Wenyingzhuangia    | Flavobacteriaceae  | 0.161380659 | 0.213716375 | Bacteroidetes   | Bacteroidetes  |
| Gordonia           | Brevibacterium     | 0.125961995 | 0.166502    | Actinobacteria  | Actinobacteria |
| Campylobacter      | Helicobacter       | 0.162576286 | 0.214872583 | Proteobacteria  | Proteobacteria |
| Providencia        | Sodalis            | 0.189313104 | 0.250208466 | Proteobacteria  | Proteobacteria |
| Pelosinus          | Mycoplasma         | 0.025477347 | 0.033657878 | Firmicutes      | Tenericutes    |
| Pantoea            | Plautia            | 0.477738095 | 0.630965473 | Proteobacteria  | Proteobacteria |
| Lawsonella         | Brevibacterium     | 0.125961995 | 0.166279214 | Actinobacteria  | Actinobacteria |
| Porphyrobacter     | Altererythrobacter | 0.319203322 | 0.421151005 | Proteobacteria  | Proteobacteria |
| Kineococcus        | Actinobacteria     | 0.072679127 | 0.095879401 | Actinobacteria  | Actinobacteria |
| Geoglobus          | Archaeoglobus      | 0.272030401 | 0.358818922 | Euryarchaeota   | Euryarchaeota  |
| Ensifer            | Sinorhizobium      | 0.503379987 | 0.663326698 | Proteobacteria  | Proteobacteria |
| Caldisericum       | Clostridium        | 0.062850588 | 0.082815844 | Caldiserica     | Firmicutes     |
| Sodalis            | Plesiomonas        | 0.189313104 | 0.249356202 | Proteobacteria  | Proteobacteria |
| Desulfuromonas     | Pelobacter         | 0.212486283 | 0.27980406  | Proteobacteria  | Proteobacteria |
| Alicyclophilus     | Acidovorax         | 0.464019965 | 0.610766852 | Proteobacteria  | Proteobacteria |
| Pluralibacter      | Pseudomonas        | 0.175575691 | 0.231041022 | Proteobacteria  | Proteobacteria |
| Proteus            | Sodalis            | 0.189313104 | 0.248949842 | Proteobacteria  | Proteobacteria |

|                        |                  |             |             |                 |                |
|------------------------|------------------|-------------|-------------|-----------------|----------------|
| Clostridium            | Mageeibacillus   | 0.062850588 | 0.082580564 | Firmicutes      | Firmicutes     |
| Actinobacteria         | Bifidobacterium  | 0.072679127 | 0.095455853 | Actinobacteria  | Actinobacteria |
| Actinotignum           | Actinobacteria   | 0.072679127 | 0.095308536 | Actinobacteria  | Actinobacteria |
| Wigglesworthia         | Clostridium      | 0.062850588 | 0.08237671  | Proteobacteria  | Firmicutes     |
| Halomonas              | Chromohalobacter | 0.348529712 | 0.456460313 | Proteobacteria  | Proteobacteria |
| Brevibacterium         | Tsukamurella     | 0.125961995 | 0.164785032 | Actinobacteria  | Actinobacteria |
| Sinomonas              | Actinobacteria   | 0.072679127 | 0.094918139 | Actinobacteria  | Actinobacteria |
| Mycoplasma             | Ehrlichia        | 0.025477347 | 0.033270463 | Tenericutes     | Proteobacteria |
| Actinobacteria         | Cryobacterium    | 0.072679127 | 0.094730203 | Actinobacteria  | Actinobacteria |
| Nakamurella            | Brevibacterium   | 0.125961995 | 0.164168214 | Actinobacteria  | Actinobacteria |
| Acidipropionibacterium | Actinobacteria   | 0.072679127 | 0.094659533 | Actinobacteria  | Actinobacteria |
| Hoyosella              | Actinobacteria   | 0.072679127 | 0.094591676 | Actinobacteria  | Actinobacteria |
| Thioalkalivibrio       | Pseudomonas      | 0.175575691 | 0.228390459 | Proteobacteria  | Proteobacteria |
| Saccharomonospora      | Actinobacteria   | 0.072679127 | 0.094528262 | Actinobacteria  | Actinobacteria |
| Mycoplasma             | Wolbachia        | 0.025477347 | 0.033109108 | Tenericutes     | Proteobacteria |
| Clostridium            | Selenomonas      | 0.062850588 | 0.081601674 | Firmicutes      | Firmicutes     |
| Nautilia               | Clostridium      | 0.062850588 | 0.081443808 | Proteobacteria  | Firmicutes     |
| Lysinibacillus         | Solibacillus     | 0.284988147 | 0.36918018  | Firmicutes      | Firmicutes     |
| Diaphorobacter         | Pseudomonas      | 0.175575691 | 0.226419101 | Proteobacteria  | Proteobacteria |
| Mycoplasma             | Chlamydia        | 0.025477347 | 0.03284315  | Tenericutes     | Chlamydiae     |
| Tumebacillus           | Clostridium      | 0.062850588 | 0.081002819 | Firmicutes      | Firmicutes     |
| Polynucleobacter       | beta             | 0.518661102 | 0.668352402 | Proteobacteria  | Proteobacteria |
| Grimontia              | Vibrio           | 0.271195069 | 0.348913094 | Proteobacteria  | Proteobacteria |
| Flexistipes            | Clostridium      | 0.062850588 | 0.080644068 | Deferribacteres | Firmicutes     |
| Oenococcus             | Lactobacillus    | 0.158222465 | 0.202842512 | Firmicutes      | Firmicutes     |
| Enterobacter           | Klebsiella       | 0.459467233 | 0.588752424 | Proteobacteria  | Proteobacteria |
| Immundisolibacter      | Pseudomonas      | 0.175575691 | 0.224970654 | Proteobacteria  | Proteobacteria |
| Geoalkalibacter        | Pelobacter       | 0.212486283 | 0.272087734 | Proteobacteria  | Proteobacteria |
| Corynebacterium        | Micrococcus      | 0.177688971 | 0.227382938 | Actinobacteria  | Actinobacteria |
| Aromatoleum            | Pseudomonas      | 0.175575691 | 0.224296485 | Proteobacteria  | Proteobacteria |
| Lelliottia             | Enterobacter     | 0.557933943 | 0.712689741 | Proteobacteria  | Proteobacteria |
| Aeromonas              | Pseudomonas      | 0.175575691 | 0.223789053 | Proteobacteria  | Proteobacteria |
| Alkalilimnicola        | Pseudomonas      | 0.175575691 | 0.223293712 | Proteobacteria  | Proteobacteria |
| Mycoplasma             | Moraxella        | 0.025477347 | 0.032389485 | Tenericutes     | Proteobacteria |

|                    |                    |             |             |                |                |
|--------------------|--------------------|-------------|-------------|----------------|----------------|
| Eubacterium        | Dehalobacterium    | 0.078449324 | 0.099728845 | Firmicutes     | Firmicutes     |
| Curtobacterium     | Actinobacteria     | 0.072679127 | 0.092387011 | Actinobacteria | Actinobacteria |
| Mycoplasma         | Ornithobacterium   | 0.025477347 | 0.032365823 | Tenericutes    | Bacteroidetes  |
| Rhodococcus        | Actinobacteria     | 0.072679127 | 0.092305667 | Actinobacteria | Actinobacteria |
| Kluyvera           | Klebsiella         | 0.459467233 | 0.582870127 | Proteobacteria | Proteobacteria |
| Novibacillus       | Clostridium        | 0.062850588 | 0.079721226 | Firmicutes     | Firmicutes     |
| Cellulosimicrobium | Actinobacteria     | 0.072679127 | 0.092169021 | Actinobacteria | Actinobacteria |
| Nonlabens          | Flavobacteriaceae  | 0.161380659 | 0.204601585 | Bacteroidetes  | Bacteroidetes  |
| Butyrivibrio       | Mycoplasma         | 0.025477347 | 0.032298362 | Firmicutes     | Tenericutes    |
| Luteipulveratus    | Actinobacteria     | 0.072679127 | 0.09210128  | Actinobacteria | Actinobacteria |
| Photorhabdus       | Sodalis            | 0.189313104 | 0.239883287 | Proteobacteria | Proteobacteria |
| Bacillus           | Tumebacillus       | 0.132343801 | 0.167601796 | Firmicutes     | Firmicutes     |
| Orientia           | Mycoplasma         | 0.025477347 | 0.032261359 | Proteobacteria | Tenericutes    |
| Mycobacterium      | Actinobacteria     | 0.072679127 | 0.092019114 | Actinobacteria | Actinobacteria |
| Citrobacter        | Klebsiella         | 0.459467233 | 0.581223958 | Proteobacteria | Proteobacteria |
| Pantoea            | Erwinia            | 0.467795284 | 0.591147238 | Proteobacteria | Proteobacteria |
| Ezakiella          | Eubacterium        | 0.078449324 | 0.099126298 | Firmicutes     | Firmicutes     |
| Aerococcus         | Lactobacillus      | 0.158222465 | 0.199852965 | Firmicutes     | Firmicutes     |
| Chryseobacterium   | Elizabethkingia    | 0.314554333 | 0.397076561 | Bacteroidetes  | Bacteroidetes  |
| Mycoplasma         | Ignavibacterium    | 0.025477347 | 0.032128464 | Tenericutes    | Bacteroidetes  |
| Mycoplasma         | Chlamydophila      | 0.025477347 | 0.032126309 | Tenericutes    | Chlamydiae     |
| Salinicoccus       | Clostridium        | 0.062850588 | 0.079242237 | Firmicutes     | Firmicutes     |
| Agromyces          | Actinobacteria     | 0.072679127 | 0.091581543 | Actinobacteria | Actinobacteria |
| Brevibacillus      | Paenibacillus      | 0.161111346 | 0.202964701 | Firmicutes     | Firmicutes     |
| Klebsiella         | Enterobacteriaceae | 0.459467233 | 0.57806237  | Proteobacteria | Proteobacteria |
| Geodermatophilus   | Actinobacteria     | 0.072679127 | 0.091437305 | Actinobacteria | Actinobacteria |
| Ornithobacterium   | Flavobacteriaceae  | 0.161380659 | 0.203017183 | Bacteroidetes  | Bacteroidetes  |
| Halanaerobium      | Eubacterium        | 0.078449324 | 0.098673196 | Firmicutes     | Firmicutes     |
| Eubacterium        | Megasphaera        | 0.078449324 | 0.098620655 | Firmicutes     | Firmicutes     |
| Mycoplasma         | Nonlabens          | 0.025477347 | 0.032018928 | Tenericutes    | Bacteroidetes  |
| Aliivibrio         | Pseudoalteromonas  | 0.161098934 | 0.202357986 | Proteobacteria | Proteobacteria |
| Streptococcus      | Eubacterium        | 0.078449324 | 0.098466795 | Firmicutes     | Firmicutes     |
| Blattabacterium    | Clostridium        | 0.062850588 | 0.078799513 | Bacteroidetes  | Firmicutes     |
| Phaeobacter        | Ruegeria           | 0.394096176 | 0.494094108 | Proteobacteria | Proteobacteria |

|                       |                    |             |             |                |                |
|-----------------------|--------------------|-------------|-------------|----------------|----------------|
| Actinobacteria        | Tsukamurella       | 0.072679127 | 0.091117946 | Actinobacteria | Actinobacteria |
| Sulfurospirillum      | Mycoplasma         | 0.025477347 | 0.031930486 | Proteobacteria | Tenericutes    |
| Flavobacteriaceae     | Gramella           | 0.161380659 | 0.202237586 | Bacteroidetes  | Bacteroidetes  |
| Allofrancisella       | Clostridium        | 0.062850588 | 0.07871971  | Proteobacteria | Firmicutes     |
| Actinobacteria        | Thermomonospora    | 0.072679127 | 0.090932413 | Actinobacteria | Actinobacteria |
| Dermabacter           | Brevibacterium     | 0.125961995 | 0.157420716 | Actinobacteria | Actinobacteria |
| Laribacter            | Pseudomonas        | 0.175575691 | 0.219350618 | Proteobacteria | Proteobacteria |
| Brachybacterium       | Actinobacteria     | 0.072679127 | 0.090729228 | Actinobacteria | Actinobacteria |
| Mycoplasma            | Croceibacter       | 0.025477347 | 0.031778571 | Tenericutes    | Bacteroidetes  |
| Gardnerella           | Actinobacteria     | 0.072679127 | 0.090642326 | Actinobacteria | Actinobacteria |
| Pseudoxanthomonas     | Pseudomonas        | 0.175575691 | 0.218906646 | Proteobacteria | Proteobacteria |
| Brevibacterium        | Propionibacterium  | 0.125961995 | 0.157025744 | Actinobacteria | Actinobacteria |
| Legionella            | Mycoplasma         | 0.025477347 | 0.031753638 | Proteobacteria | Tenericutes    |
| Flavobacteriaceae     | Dokdonia           | 0.161380659 | 0.200880695 | Bacteroidetes  | Bacteroidetes  |
| Mycoplasma            | Persephonella      | 0.025477347 | 0.031677318 | Tenericutes    | Aquificae      |
| Marichromatium        | Pseudomonas        | 0.175575691 | 0.21826831  | Proteobacteria | Proteobacteria |
| Thiohalobacter        | Pseudomonas        | 0.175575691 | 0.218256826 | Proteobacteria | Proteobacteria |
| Oceanisphaera         | Pseudoalteromonas  | 0.161098934 | 0.200045467 | Proteobacteria | Proteobacteria |
| Buchnera              | Clostridium        | 0.062850588 | 0.077957067 | Proteobacteria | Firmicutes     |
| Leclercia             | Klebsiella         | 0.459467233 | 0.569722222 | Proteobacteria | Proteobacteria |
| Polaromonas           | Pseudomonas        | 0.175575691 | 0.217645034 | Proteobacteria | Proteobacteria |
| Actinobacteria        | Streptomyces       | 0.072679127 | 0.090016324 | Actinobacteria | Actinobacteria |
| Roseateles            | Pseudomonas        | 0.175575691 | 0.217402937 | Proteobacteria | Proteobacteria |
| Salinispora           | Actinobacteria     | 0.072679127 | 0.089990368 | Actinobacteria | Actinobacteria |
| Mycoplasma            | Coxiella-like      | 0.025477347 | 0.031529816 | Tenericutes    | Proteobacteria |
| Actinobacteria        | Cnuibacter         | 0.072679127 | 0.089935479 | Actinobacteria | Actinobacteria |
| Brochothrix           | Lactobacillus      | 0.158222465 | 0.195729913 | Firmicutes     | Firmicutes     |
| Vibrio                | Pseudoalteromonas  | 0.161098934 | 0.199101963 | Proteobacteria | Proteobacteria |
| Lelliottia            | Klebsiella         | 0.459467233 | 0.56783135  | Proteobacteria | Proteobacteria |
| Photobacterium        | Pseudoalteromonas  | 0.161098934 | 0.19896605  | Proteobacteria | Proteobacteria |
| Bacillus              | Vagococcus         | 0.132343801 | 0.163131441 | Firmicutes     | Firmicutes     |
| Burkholderiales       | Basilea            | 0.092214558 | 0.113606398 | Proteobacteria | Proteobacteria |
| Pseudopropionibacteri | Actinobacteria     | 0.072679127 | 0.089489387 | Actinobacteria | Actinobacteria |
| Kluyvera              | Enterobacteriaceae | 0.511696136 | 0.629420579 | Proteobacteria | Proteobacteria |



|                      |                   |             |             |                |                 |
|----------------------|-------------------|-------------|-------------|----------------|-----------------|
| Bibersteinia         | Actinobacillus    | 0.409596236 | 0.503761533 | Proteobacteria | Proteobacteria  |
| Flavobacterium       | Lacinutrix        | 0.260303566 | 0.319814055 | Bacteroidetes  | Bacteroidetes   |
| Hoyosella            | Brevibacterium    | 0.125961995 | 0.154735233 | Actinobacteria | Actinobacteria  |
| Mycoplasma           | Murdochiella      | 0.025477347 | 0.031278085 | Tenericutes    | Firmicutes      |
| Kitasatospora        | Brevibacterium    | 0.125961995 | 0.154413228 | Actinobacteria | Actinobacteria  |
| Segniliparus         | Actinobacteria    | 0.072679127 | 0.088984844 | Actinobacteria | Actinobacteria  |
| Mycobacterium        | Tsukamurella      | 0.255167927 | 0.312319742 | Actinobacteria | Actinobacteria  |
| Corynebacterium      | Lawsonella        | 0.177688971 | 0.217378199 | Actinobacteria | Actinobacteria  |
| Thermosediminibacter | Eubacterium       | 0.078449324 | 0.09580293  | Firmicutes     | Firmicutes      |
| Beutenbergia         | Actinobacteria    | 0.072679127 | 0.08870471  | Actinobacteria | Actinobacteria  |
| Mycoplasma           | Flexistipes       | 0.025477347 | 0.03108187  | Tenericutes    | Deferribacteres |
| Corynebacterium      | Tsukamurella      | 0.206499705 | 0.251741397 | Actinobacteria | Actinobacteria  |
| Borrelia             | Clostridium       | 0.062850588 | 0.076568021 | Spirochaetes   | Firmicutes      |
| Thiomonas            | Pseudomonas       | 0.175575691 | 0.213786004 | Proteobacteria | Proteobacteria  |
| Borreliella          | Clostridium       | 0.062850588 | 0.07651537  | Spirochaetes   | Firmicutes      |
| Clostridium          | Faecalibaculum    | 0.062850588 | 0.076361935 | Firmicutes     | Firmicutes      |
| Moritella            | Pseudoalteromonas | 0.161098934 | 0.195489072 | Proteobacteria | Proteobacteria  |
| Mycoplasma           | Neorickettsia     | 0.025477347 | 0.03086468  | Tenericutes    | Proteobacteria  |
| Modestobacter        | Actinobacteria    | 0.072679127 | 0.087890931 | Actinobacteria | Actinobacteria  |
| Leclercia            | Enterobacter      | 0.557933943 | 0.674541613 | Proteobacteria | Proteobacteria  |
| Tepidanaerobacter    | Eubacterium       | 0.078449324 | 0.094803348 | Firmicutes     | Firmicutes      |
| Celeribacter         | Pelagibaca        | 0.319579628 | 0.385809234 | Proteobacteria | Proteobacteria  |
| Capnocytophaga       | Flavobacteriaceae | 0.161380659 | 0.194336724 | Bacteroidetes  | Bacteroidetes   |
| Mycoplasma           | cyanobacterium    | 0.025477347 | 0.030669709 | Tenericutes    | Cyanobacteria   |
| Hafnia               | Obesumbacterium   | 0.699265576 | 0.841609104 | Proteobacteria | Proteobacteria  |
| Raoultella           | Pseudomonas       | 0.175575691 | 0.211232378 | Proteobacteria | Proteobacteria  |
| Desulfitobacterium   | Eubacterium       | 0.078449324 | 0.094352996 | Firmicutes     | Firmicutes      |
| Aminobacterium       | Clostridium       | 0.062850588 | 0.075589094 | Synergistetes  | Firmicutes      |
| Eubacterium          | Ethanoligenens    | 0.078449324 | 0.094288123 | Firmicutes     | Firmicutes      |
| Xanthomonas          | Pseudomonas       | 0.175575691 | 0.210977774 | Proteobacteria | Proteobacteria  |
| Dietzia              | Actinobacteria    | 0.072679127 | 0.087316618 | Actinobacteria | Actinobacteria  |
| Negativicoccus       | Clostridium       | 0.062850588 | 0.075446696 | Firmicutes     | Firmicutes      |
| Pluralibacter        | Klebsiella        | 0.459467233 | 0.550925064 | Proteobacteria | Proteobacteria  |
| Clostridium          | Pseudothermotoga  | 0.062850588 | 0.075358911 | Firmicutes     | Thermotogae     |

|                     |                   |             |             |                |                |
|---------------------|-------------------|-------------|-------------|----------------|----------------|
| Faecalibacterium    | Lachnoclostridium | 0.132857063 | 0.159260912 | Firmicutes     | Firmicutes     |
| Acidianus           | Sulfolobus        | 0.34651521  | 0.41512082  | Crenarchaeota  | Crenarchaeota  |
| Pimelobacter        | Actinobacteria    | 0.072679127 | 0.087033655 | Actinobacteria | Actinobacteria |
| Eubacterium         | Lactobacillus     | 0.078449324 | 0.09391684  | Firmicutes     | Firmicutes     |
| Dehalobacter        | Eubacterium       | 0.078449324 | 0.093818177 | Firmicutes     | Firmicutes     |
| Desulfosporosinus   | Eubacterium       | 0.078449324 | 0.093800785 | Firmicutes     | Firmicutes     |
| Agarivorans         | Pseudoalteromonas | 0.161098934 | 0.192562435 | Proteobacteria | Proteobacteria |
| Jonesia             | Brevibacterium    | 0.125961995 | 0.150499933 | Actinobacteria | Actinobacteria |
| Erysipelotrichaceae | Eubacterium       | 0.078449324 | 0.093721414 | Firmicutes     | Firmicutes     |
| Celeribacter        | Thiobacimonas     | 0.319579628 | 0.381763073 | Proteobacteria | Proteobacteria |
| Burkholderiales     | Taylorella        | 0.092214558 | 0.110005522 | Proteobacteria | Proteobacteria |
| Halothermothrix     | Eubacterium       | 0.078449324 | 0.093524053 | Firmicutes     | Firmicutes     |
| Sphingobium         | Sphingomonas      | 0.292558438 | 0.348739834 | Proteobacteria | Proteobacteria |
| Comamonas           | Pseudomonas       | 0.175575691 | 0.209245364 | Proteobacteria | Proteobacteria |
| Lutibacter          | Clostridium       | 0.063423572 | 0.075559169 | Bacteroidetes  | Firmicutes     |
| Listeria            | Lactobacillus     | 0.158222465 | 0.188394972 | Firmicutes     | Firmicutes     |
| Corynebacterium     | Nocardia          | 0.201379737 | 0.239447569 | Actinobacteria | Actinobacteria |
| Enterococcus        | Melissococcus     | 0.302178503 | 0.359248851 | Firmicutes     | Firmicutes     |
| Kluyvera            | Kosakonia         | 0.511696136 | 0.608103351 | Proteobacteria | Proteobacteria |
| Corynebacterium     | Actinomyces       | 0.177688971 | 0.210880889 | Actinobacteria | Actinobacteria |
| Allochromatium      | Pseudomonas       | 0.175575691 | 0.208360855 | Proteobacteria | Proteobacteria |
| Kitasatospora       | Actinobacteria    | 0.072679127 | 0.086249421 | Actinobacteria | Actinobacteria |
| Leisingera          | Ruegeria          | 0.394096176 | 0.467524527 | Proteobacteria | Proteobacteria |
| Devriesea           | Brevibacterium    | 0.125961995 | 0.149300907 | Actinobacteria | Actinobacteria |
| Klebsiella          | Pseudomonas       | 0.175575691 | 0.208030998 | Proteobacteria | Proteobacteria |
| Bacillus            | Thermobacillus    | 0.132343801 | 0.156659279 | Firmicutes     | Firmicutes     |
| Aggregatibacter     | Mannheimia        | 0.396279068 | 0.468947162 | Proteobacteria | Proteobacteria |
| Frischella          | Clostridium       | 0.063423572 | 0.074990014 | Proteobacteria | Firmicutes     |
| Mycoplasma          | Photobacterium    | 0.025477347 | 0.030123488 | Tenericutes    | Proteobacteria |
| Azospirillum        | Rhodospirillum    | 0.265465699 | 0.313760753 | Proteobacteria | Proteobacteria |
| Arsenophonus        | Clostridium       | 0.062850588 | 0.074131822 | Proteobacteria | Firmicutes     |
| Streptococcus       | Lactobacillus     | 0.158222465 | 0.186600817 | Firmicutes     | Firmicutes     |
| Mycoplasma          | Kosmotoga         | 0.025477347 | 0.030026356 | Tenericutes    | Thermotogae    |
| Mycoplasma          | Aminobacterium    | 0.025477347 | 0.030017827 | Tenericutes    | Synergistetes  |

|                     |                     |             |             |                |                |
|---------------------|---------------------|-------------|-------------|----------------|----------------|
| Verminephrobacter   | Pseudomonas         | 0.175575691 | 0.206807336 | Proteobacteria | Proteobacteria |
| Mycoplasma          | Ruminiclostridium   | 0.025477347 | 0.029986288 | Tenericutes    | Firmicutes     |
| Celeribacter        | Defluviimonas       | 0.319579628 | 0.376067168 | Proteobacteria | Proteobacteria |
| Clostridium         | Serratia            | 0.062850588 | 0.073958181 | Firmicutes     | Proteobacteria |
| Treponema           | Clostridium         | 0.062850588 | 0.07395543  | Spirochaetes   | Firmicutes     |
| Riemerella          | Chryseobacterium    | 0.314554333 | 0.370080288 | Bacteroidetes  | Bacteroidetes  |
| Erwinia             | Pseudomonas         | 0.175575691 | 0.206430243 | Proteobacteria | Proteobacteria |
| Agrobacterium       | Neorhizobium        | 0.368942819 | 0.433699427 | Proteobacteria | Proteobacteria |
| Mycoplasma          | Thermosulfidibacter | 0.025477347 | 0.029938552 | Tenericutes    | Aquificae      |
| Mycobacterium       | Corynebacterium     | 0.206499705 | 0.242550624 | Actinobacteria | Actinobacteria |
| Eubacterium         | Selenomonas         | 0.078449324 | 0.092113846 | Firmicutes     | Firmicutes     |
| Kosakonia           | Klebsiella          | 0.459467233 | 0.539416143 | Proteobacteria | Proteobacteria |
| Amphibacillus       | Eubacterium         | 0.078449324 | 0.092072302 | Firmicutes     | Firmicutes     |
| Halorhodospira      | Pseudomonas         | 0.175575691 | 0.205940902 | Proteobacteria | Proteobacteria |
| Betaproteobacteria  | Pseudomonas         | 0.175575691 | 0.205774716 | Proteobacteria | Proteobacteria |
| Algibacter          | Mycoplasma          | 0.025477347 | 0.029837289 | Bacteroidetes  | Tenericutes    |
| Microbulbifer       | Pseudomonas         | 0.175575691 | 0.205440828 | Proteobacteria | Proteobacteria |
| Archaeoglobus       | Ferroglobus         | 0.272030401 | 0.318097427 | Euryarchaeota  | Euryarchaeota  |
| Dyella              | Pseudomonas         | 0.175575691 | 0.205210198 | Proteobacteria | Proteobacteria |
| Clostridium         | Thermovirga         | 0.062850588 | 0.073446312 | Firmicutes     | Synergistetes  |
| Grimontia           | Pseudoalteromonas   | 0.161098934 | 0.188233743 | Proteobacteria | Proteobacteria |
| Dialister           | Eubacterium         | 0.078449324 | 0.091636015 | Firmicutes     | Firmicutes     |
| Mycoplasma          | Atopobium           | 0.025477347 | 0.029752888 | Tenericutes    | Actinobacteria |
| Lysinibacillus      | Rummeliibacillus    | 0.284988147 | 0.332580617 | Firmicutes     | Firmicutes     |
| Rothia              | Brevibacterium      | 0.125961995 | 0.146859551 | Actinobacteria | Actinobacteria |
| Desulfotomaculum    | Thermincola         | 0.198423348 | 0.231225797 | Firmicutes     | Firmicutes     |
| Eubacterium         | Fusobacterium       | 0.078449324 | 0.091374493 | Firmicutes     | Fusobacteria   |
| Thiobacillus        | Pseudomonas         | 0.175575691 | 0.204458784 | Proteobacteria | Proteobacteria |
| Azospirillum        | Pseudomonas         | 0.175575691 | 0.204401886 | Proteobacteria | Proteobacteria |
| Gibbsiella          | Pseudomonas         | 0.175575691 | 0.204340476 | Proteobacteria | Proteobacteria |
| Mycoplasma          | Paenibacillus       | 0.025477347 | 0.029651262 | Tenericutes    | Firmicutes     |
| Celeribacter        | Marinovum           | 0.319579628 | 0.371566395 | Proteobacteria | Proteobacteria |
| Erysipelotrichaceae | Mycoplasma          | 0.025477347 | 0.029602539 | Firmicutes     | Tenericutes    |
| Aneurinibacillus    | Paenibacillus       | 0.161111346 | 0.186953849 | Firmicutes     | Firmicutes     |

|                    |                    |             |             |                |                |
|--------------------|--------------------|-------------|-------------|----------------|----------------|
| Oenococcus         | Clostridium        | 0.062850588 | 0.072864771 | Firmicutes     | Firmicutes     |
| Phoenicibacter     | Clostridium        | 0.062850588 | 0.072736128 | Actinobacteria | Firmicutes     |
| Sulfuritalea       | Pseudomonas        | 0.175575691 | 0.202857904 | Proteobacteria | Proteobacteria |
| Tenacibaculum      | Clostridium        | 0.062850588 | 0.072571526 | Bacteroidetes  | Firmicutes     |
| Cutibacterium      | Brevibacterium     | 0.125961995 | 0.14538884  | Actinobacteria | Actinobacteria |
| Siansivirga        | Flavobacterium     | 0.260303566 | 0.300158558 | Bacteroidetes  | Bacteroidetes  |
| Mycobacterium      | Amycolatopsis      | 0.255167927 | 0.293906907 | Actinobacteria | Actinobacteria |
| Actinobacteria     | Nocardiopsis       | 0.072679127 | 0.083593747 | Actinobacteria | Actinobacteria |
| Rhodanobacter      | Pseudomonas        | 0.175575691 | 0.201786107 | Proteobacteria | Proteobacteria |
| Altererythrobacter | Croceicoccus       | 0.319203322 | 0.36659749  | Proteobacteria | Proteobacteria |
| Nocardia           | Brevibacterium     | 0.125961995 | 0.144659422 | Actinobacteria | Actinobacteria |
| Mycoplasma         | Dehalobacterium    | 0.025477347 | 0.029255645 | Tenericutes    | Firmicutes     |
| Mycoplasma         | Moritella          | 0.025477347 | 0.029253025 | Tenericutes    | Proteobacteria |
| Flavobacterium     | Tenacibaculum      | 0.260303566 | 0.298542889 | Bacteroidetes  | Bacteroidetes  |
| Bacillus           | Lactobacillus      | 0.132343801 | 0.151775842 | Firmicutes     | Firmicutes     |
| Mycoplasma         | Desulfosporosinus  | 0.025477347 | 0.029210983 | Tenericutes    | Firmicutes     |
| Vagococcus         | Enterococcus       | 0.302178503 | 0.346387509 | Firmicutes     | Firmicutes     |
| Murdochiella       | Clostridium        | 0.062850588 | 0.071960915 | Firmicutes     | Firmicutes     |
| Plautia            | Pseudomonas        | 0.175575691 | 0.200964124 | Proteobacteria | Proteobacteria |
| Pelosinus          | Eubacterium        | 0.078449324 | 0.089789834 | Firmicutes     | Firmicutes     |
| Flavobacteriaceae  | Clostridium        | 0.062850588 | 0.071918553 | Bacteroidetes  | Firmicutes     |
| Pseudoxanthomonas  | Stenotrophomonas   | 0.411250316 | 0.470070181 | Proteobacteria | Proteobacteria |
| Leclercia          | Pseudomonas        | 0.175575691 | 0.200480314 | Proteobacteria | Proteobacteria |
| Komagataeibacter   | Acetobacter        | 0.328547737 | 0.374485312 | Proteobacteria | Proteobacteria |
| Rhodoferax         | Pseudomonas        | 0.175575691 | 0.200081223 | Proteobacteria | Proteobacteria |
| Kluyvera           | Enterobacter       | 0.511696136 | 0.58292406  | Proteobacteria | Proteobacteria |
| Escherichia        | Klebsiella         | 0.459467233 | 0.523361367 | Proteobacteria | Proteobacteria |
| Ramlibacter        | Betaproteobacteria | 0.23303541  | 0.265390911 | Proteobacteria | Proteobacteria |
| Mycoplasma         | Ndongobacter       | 0.025477347 | 0.028988527 | Tenericutes    | Firmicutes     |
| Eubacterium        | Desulfotomaculum   | 0.078449324 | 0.089176179 | Firmicutes     | Firmicutes     |
| Baumannia          | Clostridium        | 0.062850588 | 0.071423359 | Proteobacteria | Firmicutes     |
| Halobacteroides    | Eubacterium        | 0.088134527 | 0.10012125  | Firmicutes     | Firmicutes     |
| Ndongobacter       | Clostridium        | 0.062850588 | 0.071356932 | Firmicutes     | Firmicutes     |
| Novosphingobium    | Altererythrobacter | 0.319203322 | 0.362210681 | Proteobacteria | Proteobacteria |

|                   |                   |             |             |                |                |
|-------------------|-------------------|-------------|-------------|----------------|----------------|
| Psychromonas      | Pseudoalteromonas | 0.161098934 | 0.182787606 | Proteobacteria | Proteobacteria |
| Gilliamella       | Clostridium       | 0.063423572 | 0.071945445 | Proteobacteria | Firmicutes     |
| Bacillus          | Enterococcus      | 0.132343801 | 0.150118893 | Firmicutes     | Firmicutes     |
| Salmonella        | Klebsiella        | 0.459467233 | 0.52053946  | Proteobacteria | Proteobacteria |
| Bacillus          | Tetragenococcus   | 0.132343801 | 0.149790259 | Firmicutes     | Firmicutes     |
| Actinobacteria    | Microlunatus      | 0.072679127 | 0.082237636 | Actinobacteria | Actinobacteria |
| Planococcus       | Lysinibacillus    | 0.284988147 | 0.32246613  | Firmicutes     | Firmicutes     |
| Rhodospirillum    | Nitrospirillum    | 0.265465699 | 0.300207643 | Proteobacteria | Proteobacteria |
| Listeria          | Eubacterium       | 0.078449324 | 0.088609495 | Firmicutes     | Firmicutes     |
| Pasteurella       | Mannheimia        | 0.384896686 | 0.434742035 | Proteobacteria | Proteobacteria |
| Mycoplasma        | Myroides          | 0.025477347 | 0.028775996 | Tenericutes    | Bacteroidetes  |
| Tetragenococcus   | Enterococcus      | 0.302178503 | 0.341184375 | Firmicutes     | Firmicutes     |
| Gluconacetobacter | Acetobacter       | 0.328547737 | 0.370942914 | Proteobacteria | Proteobacteria |
| Mycoplasma        | Snodgrassella     | 0.025477347 | 0.028753773 | Tenericutes    | Proteobacteria |
| Bacterioplanes    | Pseudomonas       | 0.175575691 | 0.197945174 | Proteobacteria | Proteobacteria |
| Kosakonia         | Pseudomonas       | 0.175575691 | 0.197940611 | Proteobacteria | Proteobacteria |
| Lysobacter        | Pseudomonas       | 0.175575691 | 0.197799606 | Proteobacteria | Proteobacteria |
| synthetic         | Klebsiella        | 0.459467233 | 0.516706188 | Proteobacteria | Proteobacteria |
| Celeribacter      | Roseibacterium    | 0.319579628 | 0.35877619  | Proteobacteria | Proteobacteria |
| Mycoplasma        | Kingella          | 0.025477347 | 0.028601543 | Tenericutes    | Proteobacteria |
| Kluyvera          | Raoultella        | 0.511696136 | 0.574338319 | Proteobacteria | Proteobacteria |
| Gallibacterium    | Haemophilus       | 0.356592956 | 0.399894927 | Proteobacteria | Proteobacteria |
| Cronobacter       | Pseudomonas       | 0.175575691 | 0.196778176 | Proteobacteria | Proteobacteria |
| Simiduia          | Pseudomonas       | 0.175575691 | 0.196748886 | Proteobacteria | Proteobacteria |
| Mycobacterium     | Brevibacterium    | 0.125961995 | 0.141009142 | Actinobacteria | Actinobacteria |
| Symbiobacterium   | Clostridium       | 0.062850588 | 0.070353553 | Firmicutes     | Firmicutes     |
| Eubacterium       | Thermincola       | 0.078449324 | 0.087709511 | Firmicutes     | Firmicutes     |
| Mycoplasma        | Ruminococcaceae   | 0.025477347 | 0.028459178 | Tenericutes    | Firmicutes     |
| Neisseria         | Eikenella         | 0.397279617 | 0.443629046 | Proteobacteria | Proteobacteria |
| Buchnera          | Wigglesworthia    | 0.371396499 | 0.414669546 | Proteobacteria | Proteobacteria |
| Mycoplasma        | Thermovirga       | 0.025477347 | 0.028435549 | Tenericutes    | Synergistetes  |
| Ferrimonas        | Pseudomonas       | 0.175575691 | 0.195711629 | Proteobacteria | Proteobacteria |
| Desulfobulbus     | Desulfovibrio     | 0.143678238 | 0.16012336  | Proteobacteria | Proteobacteria |
| Bacillus          | Jeotgalibaca      | 0.132343801 | 0.1474754   | Firmicutes     | Firmicutes     |

|                   |                   |             |             |                |                |
|-------------------|-------------------|-------------|-------------|----------------|----------------|
| Flavobacteriaceae | Myroides          | 0.161380659 | 0.179816671 | Bacteroidetes  | Bacteroidetes  |
| Comamonas         | Ramlibacter       | 0.306827503 | 0.341748374 | Proteobacteria | Proteobacteria |
| Actinopolyspora   | Actinobacteria    | 0.072679127 | 0.080948363 | Actinobacteria | Actinobacteria |
| Thermotoga        | Clostridium       | 0.062850588 | 0.069996565 | Thermotogae    | Firmicutes     |
| Dermatophilus     | Brevibacterium    | 0.125961995 | 0.140195074 | Actinobacteria | Actinobacteria |
| Dehalobacter      | Mycoplasma        | 0.025477347 | 0.028343042 | Firmicutes     | Tenericutes    |
| Cronobacter       | Klebsiella        | 0.459467233 | 0.511046422 | Proteobacteria | Proteobacteria |
| Shigella          | Klebsiella        | 0.459467233 | 0.510947643 | Proteobacteria | Proteobacteria |
| Mycoplasma        | Thiomicrospira    | 0.025477347 | 0.028325265 | Tenericutes    | Proteobacteria |
| Scardovia         | Actinobacteria    | 0.072679127 | 0.08063877  | Actinobacteria | Actinobacteria |
| Dickeya           | Pseudomonas       | 0.175575691 | 0.19479597  | Proteobacteria | Proteobacteria |
| Kluyvera          | Lelliottia        | 0.511696136 | 0.567436638 | Proteobacteria | Proteobacteria |
| Mycoplasma        | Fermentimonas     | 0.025477347 | 0.028246936 | Tenericutes    | Bacteroidetes  |
| Gordonia          | Actinobacteria    | 0.072679127 | 0.080560618 | Actinobacteria | Actinobacteria |
| Mycoplasma        | Cycloclasticus    | 0.025477347 | 0.028219316 | Tenericutes    | Proteobacteria |
| Flavobacterium    | Clostridium       | 0.062850588 | 0.069597437 | Bacteroidetes  | Firmicutes     |
| Thioalkalivibrio  | Thiohalobacter    | 0.305293198 | 0.337564749 | Proteobacteria | Proteobacteria |
| Chromatiaceae     | Pseudomonas       | 0.175575691 | 0.194008627 | Proteobacteria | Proteobacteria |
| Roseomonas        | Pseudomonas       | 0.175575691 | 0.193654289 | Proteobacteria | Proteobacteria |
| Mycoplasma        | Aliivibrio        | 0.025477347 | 0.028088829 | Tenericutes    | Proteobacteria |
| Comamonadaceae    | Pseudomonas       | 0.175575691 | 0.193567399 | Proteobacteria | Proteobacteria |
| Kluyvera          | Leclercia         | 0.511696136 | 0.563772463 | Proteobacteria | Proteobacteria |
| Burkholderia      | Ralstonia         | 0.330578046 | 0.364204367 | Proteobacteria | Proteobacteria |
| Dechloromonas     | Pseudomonas       | 0.175575691 | 0.193294563 | Proteobacteria | Proteobacteria |
| Mycoplasma        | Cellulophaga      | 0.025477347 | 0.028028581 | Tenericutes    | Bacteroidetes  |
| Mycoplasma        | Ruminococcus      | 0.025477347 | 0.028028443 | Tenericutes    | Firmicutes     |
| Dokdonella        | Pseudomonas       | 0.175575691 | 0.193051604 | Proteobacteria | Proteobacteria |
| Frankia           | Actinobacteria    | 0.072679127 | 0.079845789 | Actinobacteria | Actinobacteria |
| Actinobacillus    | Aggregatibacter   | 0.409596236 | 0.449936732 | Proteobacteria | Proteobacteria |
| Pantoea           | Pseudomonas       | 0.175575691 | 0.192646264 | Proteobacteria | Proteobacteria |
| Murdochiella      | Eubacterium       | 0.078449324 | 0.086037261 | Firmicutes     | Firmicutes     |
| Mycoplasma        | Halobacteriovorax | 0.025477347 | 0.027938612 | Tenericutes    | Proteobacteria |
| Kluyvera          | Citrobacter       | 0.511696136 | 0.560817093 | Proteobacteria | Proteobacteria |
| Pasteurella       | Clostridium       | 0.062850588 | 0.068850046 | Proteobacteria | Firmicutes     |

|                    |                    |             |             |                |                |
|--------------------|--------------------|-------------|-------------|----------------|----------------|
| Celeribacter       | Thioclava          | 0.319579628 | 0.349997992 | Proteobacteria | Proteobacteria |
| Mycoplasma         | Psychroflexus      | 0.025477347 | 0.027899035 | Tenericutes    | Bacteroidetes  |
| Parabacteroides    | Bacteroides        | 0.250700346 | 0.274465019 | Bacteroidetes  | Bacteroidetes  |
| Carnobacterium     | Eubacterium        | 0.078449324 | 0.085884181 | Firmicutes     | Firmicutes     |
| Mycoplasma         | Thermotoga         | 0.025477347 | 0.027885384 | Tenericutes    | Thermotogae    |
| Lactococcus        | Lactobacillus      | 0.158222465 | 0.172902323 | Firmicutes     | Firmicutes     |
| Bacillus           | Thermoanaerobacter | 0.132343801 | 0.144581377 | Firmicutes     | Firmicutes     |
| Thermacetogenium   | Desulfotomaculum   | 0.198423348 | 0.216729662 | Firmicutes     | Firmicutes     |
| Paraburkholderia   | Bordetella         | 0.232579852 | 0.253954515 | Proteobacteria | Proteobacteria |
| Mycoplasma         | Gardnerella        | 0.025477347 | 0.027782537 | Tenericutes    | Actinobacteria |
| Mycoplasma         | Thermincola        | 0.025477347 | 0.027777562 | Tenericutes    | Firmicutes     |
| Enterobacter       | Enterobacteriaceae | 0.557933943 | 0.608097907 | Proteobacteria | Proteobacteria |
| Veillonella        | Eubacterium        | 0.078449324 | 0.085477466 | Firmicutes     | Firmicutes     |
| Methylibium        | Betaproteobacteria | 0.23303541  | 0.253906009 | Proteobacteria | Proteobacteria |
| Enterobacter       | Pseudomonas        | 0.175575691 | 0.191186356 | Proteobacteria | Proteobacteria |
| Anoxybacillus      | Eubacterium        | 0.078449324 | 0.085401034 | Firmicutes     | Firmicutes     |
| Betaproteobacteria | Rubrivivax         | 0.23303541  | 0.253507654 | Proteobacteria | Proteobacteria |
| Celeribacter       | Dinoroseobacter    | 0.319579628 | 0.347546818 | Proteobacteria | Proteobacteria |
| Celeribacter       | Sulfitobacter      | 0.319579628 | 0.347238583 | Proteobacteria | Proteobacteria |
| Gluconobacter      | Acetobacter        | 0.328547737 | 0.356694004 | Proteobacteria | Proteobacteria |
| Herminiimonas      | Pseudomonas        | 0.175575691 | 0.190598849 | Proteobacteria | Proteobacteria |
| Vagococcus         | Eubacterium        | 0.078449324 | 0.085075291 | Firmicutes     | Firmicutes     |
| Dyella             | Rhodanobacter      | 0.451840659 | 0.489904719 | Proteobacteria | Proteobacteria |
| Actinobacteria     | Verrucosispora     | 0.072679127 | 0.078798379 | Actinobacteria | Actinobacteria |
| synthetic          | Shigella           | 0.796390611 | 0.863383992 | Proteobacteria | Proteobacteria |
| Heliobacterium     | Eubacterium        | 0.078449324 | 0.085029365 | Firmicutes     | Firmicutes     |
| Mycoplasma         | Thalassotalea      | 0.025477347 | 0.02761356  | Tenericutes    | Proteobacteria |
| Salmonella         | Citrobacter        | 0.573559266 | 0.621616606 | Proteobacteria | Proteobacteria |
| Rhizobacter        | Betaproteobacteria | 0.23303541  | 0.252521119 | Proteobacteria | Proteobacteria |
| Shimwellia         | Klebsiella         | 0.459467233 | 0.497866515 | Proteobacteria | Proteobacteria |
| Tessaracoccus      | Propionibacterium  | 0.255521499 | 0.276749404 | Actinobacteria | Actinobacteria |
| Agrobacterium      | Sinorhizobium      | 0.368942819 | 0.398602272 | Proteobacteria | Proteobacteria |
| Frateuria          | Pseudomonas        | 0.175575691 | 0.189646868 | Proteobacteria | Proteobacteria |
| Sulfurifustis      | Pseudomonas        | 0.175575691 | 0.189488767 | Proteobacteria | Proteobacteria |

|                     |                    |             |             |                |                |
|---------------------|--------------------|-------------|-------------|----------------|----------------|
| Spirochaeta         | Salinispira        | 0.151497491 | 0.163471739 | Spirochaetes   | Spirochaetes   |
| Luteibacter         | Pseudomonas        | 0.175575691 | 0.189381971 | Proteobacteria | Proteobacteria |
| Bernardetia         | Mycoplasma         | 0.025477347 | 0.02747873  | Bacteroidetes  | Tenericutes    |
| Flavobacterium      | Aequorivita        | 0.260303566 | 0.280700961 | Bacteroidetes  | Bacteroidetes  |
| Mycobacterium       | Pseudonocardia     | 0.255167927 | 0.275021926 | Actinobacteria | Actinobacteria |
| Enterobacter        | Kosakonia          | 0.557933943 | 0.601030206 | Proteobacteria | Proteobacteria |
| Desulfotomaculum    | Carboxydotherrmus  | 0.198423348 | 0.213633938 | Firmicutes     | Firmicutes     |
| Lelliottia          | Pseudomonas        | 0.175575691 | 0.189010863 | Proteobacteria | Proteobacteria |
| Lutibacter          | Flavobacterium     | 0.260303566 | 0.280161141 | Bacteroidetes  | Bacteroidetes  |
| Citrobacter         | synthetic          | 0.573559266 | 0.61715463  | Proteobacteria | Proteobacteria |
| Syntrophobotulus    | Eubacterium        | 0.078449324 | 0.084409555 | Firmicutes     | Firmicutes     |
| Cedecea             | Pseudomonas        | 0.175575691 | 0.188907195 | Proteobacteria | Proteobacteria |
| Celeribacter        | Rhodobacter        | 0.319579628 | 0.343784221 | Proteobacteria | Proteobacteria |
| Ferrimonas          | Pseudoalteromonas  | 0.161098934 | 0.173125041 | Proteobacteria | Proteobacteria |
| Halomonas           | Cobetia            | 0.348529712 | 0.374447673 | Proteobacteria | Proteobacteria |
| Mycoplasma          | Coprothermobacter  | 0.025477347 | 0.027362281 | Tenericutes    | Firmicutes     |
| Haloterrigena       | Natrinema          | 0.513144559 | 0.550958999 | Euryarchaeota  | Euryarchaeota  |
| Petrogla            | Clostridium        | 0.062850588 | 0.06745518  | Thermotogae    | Firmicutes     |
| Escherichia         | Citrobacter        | 0.573559266 | 0.615250375 | Proteobacteria | Proteobacteria |
| Erythrobacter       | Croceicoccus       | 0.338583594 | 0.363064632 | Proteobacteria | Proteobacteria |
| Sphingopyxis        | Altererythrobacter | 0.319203322 | 0.342164774 | Proteobacteria | Proteobacteria |
| Sodalis             | Pseudomonas        | 0.175575691 | 0.188062952 | Proteobacteria | Proteobacteria |
| Burkholderiales     | Paraburkholderia   | 0.092214558 | 0.098733609 | Proteobacteria | Proteobacteria |
| Gordonia            | Corynebacterium    | 0.206499705 | 0.220987666 | Actinobacteria | Actinobacteria |
| Sediminispirochaeta | Treponema          | 0.092132037 | 0.098580592 | Spirochaetes   | Spirochaetes   |
| Celeribacter        | Rhodovulum         | 0.319579628 | 0.341753363 | Proteobacteria | Proteobacteria |
| Histophilus         | Mannheimia         | 0.384896686 | 0.411384809 | Proteobacteria | Proteobacteria |
| Collinsella         | Clostridium        | 0.062850588 | 0.06716907  | Actinobacteria | Firmicutes     |
| Plesiomonas         | Pseudoalteromonas  | 0.161098934 | 0.172094515 | Proteobacteria | Proteobacteria |
| Haloterrigena       | Halopiger          | 0.513144559 | 0.548088427 | Euryarchaeota  | Euryarchaeota  |
| Mycoplasma          | Pseudoalteromonas  | 0.025477347 | 0.027187443 | Tenericutes    | Proteobacteria |
| Desulfuromonas      | Geobacter          | 0.269183825 | 0.28721738  | Proteobacteria | Proteobacteria |
| Jeotgalibacillus    | Eubacterium        | 0.078449324 | 0.083699356 | Firmicutes     | Firmicutes     |
| Celeribacter        | Ruegeria           | 0.319579628 | 0.340958987 | Proteobacteria | Proteobacteria |



|                    |                    |             |             |                     |                |
|--------------------|--------------------|-------------|-------------|---------------------|----------------|
| Thioflavicoccus    | Pseudomonas        | 0.175575691 | 0.187246347 | Proteobacteria      | Proteobacteria |
| Bordetella         | Betaproteobacteria | 0.23303541  | 0.248432289 | Proteobacteria      | Proteobacteria |
| Alicyclophilus     | Betaproteobacteria | 0.23303541  | 0.248367273 | Proteobacteria      | Proteobacteria |
| Celeribacter       | Phaeobacter        | 0.319579628 | 0.340474547 | Proteobacteria      | Proteobacteria |
| Enterobacteriaceae | Pseudomonas        | 0.175575691 | 0.187009842 | Proteobacteria      | Proteobacteria |
| Mycoplasma         | Cyanobacterium     | 0.025477347 | 0.027125361 | Tenericutes         | Cyanobacteria  |
| Carnobacterium     | Aerococcus         | 0.245695723 | 0.261424963 | Firmicutes          | Firmicutes     |
| Thermodesulfatator | Mycoplasma         | 0.025477347 | 0.027105765 | Thermodesulfobacter | Tenericutes    |
| Azoarcus           | Betaproteobacteria | 0.23303541  | 0.2478888   | Proteobacteria      | Proteobacteria |
| Mycobacterium      | Hoyosella          | 0.255167927 | 0.271375475 | Actinobacteria      | Actinobacteria |
| Starkeya           | Pseudomonas        | 0.175575691 | 0.18666301  | Proteobacteria      | Proteobacteria |
| Eubacterium        | Melissococcus      | 0.078449324 | 0.08339707  | Firmicutes          | Firmicutes     |
| Bdellovibrio       | Mycoplasma         | 0.025477347 | 0.027083294 | Proteobacteria      | Tenericutes    |
| Ndongobacter       | Eubacterium        | 0.078449324 | 0.083378881 | Firmicutes          | Firmicutes     |
| Cupriavidus        | Betaproteobacteria | 0.23303541  | 0.247421066 | Proteobacteria      | Proteobacteria |
| Clostridium        | Maize              | 0.062850588 | 0.066680795 | Firmicutes          | Tenericutes    |
| Hydrogenophaga     | Pseudomonas        | 0.175575691 | 0.186185248 | Proteobacteria      | Proteobacteria |
| Acetomicrobium     | Clostridium        | 0.068824019 | 0.072830862 | Synergistetes       | Firmicutes     |
| Celeribacter       | Rhodobacteraceae   | 0.319579628 | 0.338077027 | Proteobacteria      | Proteobacteria |
| Agrobacterium      | Ensifer            | 0.368942819 | 0.39026163  | Proteobacteria      | Proteobacteria |
| Mycoplasma         | Marivirga          | 0.025477347 | 0.02694657  | Tenericutes         | Bacteroidetes  |
| Betaproteobacteria | Variovorax         | 0.23303541  | 0.246417592 | Proteobacteria      | Proteobacteria |
| Eubacterium        | Jeotgalibaca       | 0.078449324 | 0.08294845  | Firmicutes          | Firmicutes     |
| Celeribacter       | Paracoccus         | 0.319579628 | 0.337709494 | Proteobacteria      | Proteobacteria |
| Acidihalobacter    | Pseudomonas        | 0.175575691 | 0.185525192 | Proteobacteria      | Proteobacteria |
| Macrococcus        | Lactobacillus      | 0.158222465 | 0.167090178 | Firmicutes          | Firmicutes     |
| Clostridium        | Vibrio             | 0.062850588 | 0.066347885 | Firmicutes          | Proteobacteria |
| Actinobacteria     | Kribbella          | 0.072679127 | 0.076721216 | Actinobacteria      | Actinobacteria |
| Ralstonia          | Betaproteobacteria | 0.23303541  | 0.245837146 | Proteobacteria      | Proteobacteria |
| Pasteurella        | Actinobacillus     | 0.409596236 | 0.431890314 | Proteobacteria      | Proteobacteria |
| Shimwellia         | Pseudomonas        | 0.175575691 | 0.185053042 | Proteobacteria      | Proteobacteria |
| Francisella        | Clostridium        | 0.062850588 | 0.066212949 | Proteobacteria      | Firmicutes     |
| Sulfuricaulis      | Pseudomonas        | 0.175575691 | 0.184922604 | Proteobacteria      | Proteobacteria |
| Citrobacter        | Enterobacter       | 0.557933943 | 0.586974347 | Proteobacteria      | Proteobacteria |

|                        |                   |             |             |                |                |
|------------------------|-------------------|-------------|-------------|----------------|----------------|
| Azorhizobium           | Pseudomonas       | 0.175575691 | 0.184593712 | Proteobacteria | Proteobacteria |
| Micromonospora         | Actinobacteria    | 0.072679127 | 0.076410742 | Actinobacteria | Actinobacteria |
| Pandoraea              | Ralstonia         | 0.330578046 | 0.347499442 | Proteobacteria | Proteobacteria |
| Proteus                | Mycoplasma        | 0.025477347 | 0.026778732 | Proteobacteria | Tenericutes    |
| Lachnoclostridium      | Intestinimonas    | 0.132857063 | 0.139325883 | Firmicutes     | Firmicutes     |
| Xanthomonas            | Lysobacter        | 0.330541251 | 0.346241902 | Proteobacteria | Proteobacteria |
| Methylococcus          | Pseudomonas       | 0.175575691 | 0.18379546  | Proteobacteria | Proteobacteria |
| Methanocaldococcus     | Methanotorris     | 0.493039083 | 0.515428455 | Euryarchaeota  | Euryarchaeota  |
| Auricoccus             | Lactobacillus     | 0.158222465 | 0.165034766 | Firmicutes     | Firmicutes     |
| Hydrogenovibrio        | Mycoplasma        | 0.025477347 | 0.026570482 | Proteobacteria | Tenericutes    |
| Macrococcus            | Eubacterium       | 0.078449324 | 0.081812282 | Firmicutes     | Firmicutes     |
| Moorella               | Eubacterium       | 0.078449324 | 0.081802868 | Firmicutes     | Firmicutes     |
| Nitrospirillum         | Pseudomonas       | 0.175575691 | 0.182896767 | Proteobacteria | Proteobacteria |
| Acidipropionibacterium | Corynebacterium   | 0.177688971 | 0.184934584 | Actinobacteria | Actinobacteria |
| Wenyingzhuangia        | Clostridium       | 0.063423572 | 0.065909903 | Bacteroidetes  | Firmicutes     |
| Flavobacterium         | Cellulophaga      | 0.263900411 | 0.274107449 | Bacteroidetes  | Bacteroidetes  |
| Halioglobus            | Pseudomonas       | 0.175575691 | 0.182350801 | Proteobacteria | Proteobacteria |
| Saccharopolyspora      | Mycobacterium     | 0.255167927 | 0.264934814 | Actinobacteria | Actinobacteria |
| Desulfitobacterium     | Desulfosporosinus | 0.292685201 | 0.303714576 | Firmicutes     | Firmicutes     |
| Celeribacter           | Tateyamaria       | 0.319579628 | 0.331552123 | Proteobacteria | Proteobacteria |
| Bacillus               | Eubacterium       | 0.078449324 | 0.081377207 | Firmicutes     | Firmicutes     |
| Enterobacter           | Raoultella        | 0.557933943 | 0.578742489 | Proteobacteria | Proteobacteria |
| Polaribacter           | Tenacibaculum     | 0.353544316 | 0.366727674 | Bacteroidetes  | Bacteroidetes  |
| Mycoplasma             | Actinobacteria    | 0.025477347 | 0.026422418 | Tenericutes    | Actinobacteria |
| Histophilus            | Clostridium       | 0.062850588 | 0.065174358 | Proteobacteria | Firmicutes     |
| Marinovum              | Ruegeria          | 0.394096176 | 0.408597488 | Proteobacteria | Proteobacteria |
| Crinalium              | Oscillatoria      | 0.30678895  | 0.317950946 | Cyanobacteria  | Cyanobacteria  |
| Eubacterium            | Mageeibacillus    | 0.078449324 | 0.081280011 | Firmicutes     | Firmicutes     |
| Kozakia                | Acetobacter       | 0.328547737 | 0.34004339  | Proteobacteria | Proteobacteria |
| Bordetella             | Castellaniella    | 0.361544995 | 0.374144876 | Proteobacteria | Proteobacteria |
| Citrobacter            | Shigella          | 0.573559266 | 0.593244969 | Proteobacteria | Proteobacteria |
| Kluyvera               | Escherichia       | 0.511696136 | 0.529169754 | Proteobacteria | Proteobacteria |
| Thioclava              | Rhodobacter       | 0.394282391 | 0.407538709 | Proteobacteria | Proteobacteria |
| Amphibacillus          | Lactobacillus     | 0.158222465 | 0.163469721 | Firmicutes     | Firmicutes     |

|                    |                    |             |             |                |                |
|--------------------|--------------------|-------------|-------------|----------------|----------------|
| Burkholderiales    | Bordetella         | 0.092214558 | 0.095269727 | Proteobacteria | Proteobacteria |
| Cronobacter        | Enterobacter       | 0.557933943 | 0.575356913 | Proteobacteria | Proteobacteria |
| Achromobacter      | Betaproteobacteria | 0.23303541  | 0.240165923 | Proteobacteria | Proteobacteria |
| Actinobacteria     | Nakamurella        | 0.072679127 | 0.074881259 | Actinobacteria | Actinobacteria |
| Brucella           | Ochrobactrum       | 0.552844089 | 0.569223732 | Proteobacteria | Proteobacteria |
| Bacillus           | Melissococcus      | 0.132343801 | 0.136213407 | Firmicutes     | Firmicutes     |
| Corynebacterium    | Propionibacterium  | 0.177688971 | 0.182834915 | Actinobacteria | Actinobacteria |
| Mycobacterium      | Pimelobacter       | 0.255167927 | 0.262501746 | Actinobacteria | Actinobacteria |
| Neospora           | Acetobacter        | 0.328547737 | 0.33778714  | Proteobacteria | Proteobacteria |
| Acidovorax         | Betaproteobacteria | 0.23303541  | 0.239506936 | Proteobacteria | Proteobacteria |
| Kluyvera           | Pseudomonas        | 0.175575691 | 0.180412044 | Proteobacteria | Proteobacteria |
| Actinomyces        | Micrococcus        | 0.249688528 | 0.256468283 | Actinobacteria | Actinobacteria |
| Novosphingobium    | Erythrobacter      | 0.338583594 | 0.347487489 | Proteobacteria | Proteobacteria |
| Rickettsiales      | Clostridium        | 0.063423572 | 0.065088596 | Proteobacteria | Firmicutes     |
| Aster              | Clostridium        | 0.062850588 | 0.064482288 | Tenericutes    | Firmicutes     |
| Enterococcus       | Eubacterium        | 0.078449324 | 0.080479475 | Firmicutes     | Firmicutes     |
| Alicyclophilus     | Paraburkholderia   | 0.232579852 | 0.238533131 | Proteobacteria | Proteobacteria |
| Saccharomonospora  | Brevibacterium     | 0.125961995 | 0.128998406 | Actinobacteria | Actinobacteria |
| Celeribacter       | Leisingera         | 0.319579628 | 0.327228644 | Proteobacteria | Proteobacteria |
| Cronobacter        | Pantoea            | 0.477738095 | 0.48895972  | Proteobacteria | Proteobacteria |
| Kluyvera           | Salmonella         | 0.511696136 | 0.523631516 | Proteobacteria | Proteobacteria |
| Tetragenococcus    | Eubacterium        | 0.078449324 | 0.080268376 | Firmicutes     | Firmicutes     |
| Kluyvera           | synthetic          | 0.511696136 | 0.523403802 | Proteobacteria | Proteobacteria |
| Syntrophobacterium | Mycoplasma         | 0.025477347 | 0.026044505 | Firmicutes     | Tenericutes    |
| Nocardia           | Actinobacteria     | 0.072679127 | 0.074256895 | Actinobacteria | Actinobacteria |
| Staphylococcus     | Eubacterium        | 0.078449324 | 0.080079628 | Firmicutes     | Firmicutes     |
| Blattabacterium    | Flavobacteriaceae  | 0.161380659 | 0.164732826 | Bacteroidetes  | Bacteroidetes  |
| Eubacterium        | Carboxydotherrus   | 0.078449324 | 0.079987629 | Firmicutes     | Firmicutes     |
| Celeribacter       | Loktanella         | 0.319579628 | 0.325839429 | Proteobacteria | Proteobacteria |
| Rhodobacteraceae   | Rhodobacter        | 0.394282391 | 0.401883596 | Proteobacteria | Proteobacteria |
| Syntrophomonas     | Mycoplasma         | 0.025477347 | 0.025960223 | Firmicutes     | Tenericutes    |
| Mycoplasma         | Providencia        | 0.025477347 | 0.025954335 | Tenericutes    | Proteobacteria |
| Herbaspirillum     | Betaproteobacteria | 0.23303541  | 0.237384532 | Proteobacteria | Proteobacteria |
| Clostridium        | Lacinutrix         | 0.068824019 | 0.070086003 | Firmicutes     | Bacteroidetes  |

|                   |                    |             |             |                |                |
|-------------------|--------------------|-------------|-------------|----------------|----------------|
| Kyrpidia          | Clostridium        | 0.062850588 | 0.063979041 | Firmicutes     | Firmicutes     |
| Staphylococcus    | Macrococcus        | 0.379265117 | 0.386011914 | Firmicutes     | Firmicutes     |
| Aeromicrobium     | Brevibacterium     | 0.125961995 | 0.128193676 | Actinobacteria | Actinobacteria |
| Ilyobacter        | Eubacterium        | 0.088134527 | 0.089653548 | Fusobacteria   | Firmicutes     |
| Tannerella        | Porphyromonas      | 0.221955156 | 0.225775088 | Bacteroidetes  | Bacteroidetes  |
| Corynebacterium   | Glutamicibacter    | 0.177688971 | 0.180652675 | Actinobacteria | Actinobacteria |
| Weeksella         | Clostridium        | 0.062850588 | 0.063869077 | Bacteroidetes  | Firmicutes     |
| Actinoalloteichus | Actinobacteria     | 0.072679127 | 0.073776297 | Actinobacteria | Actinobacteria |
| Pseudomonas       | Spiribacter        | 0.175575691 | 0.178182682 | Proteobacteria | Proteobacteria |
| Xanthobacter      | Pseudomonas        | 0.175575691 | 0.178151827 | Proteobacteria | Proteobacteria |
| Bacillus          | Kyrpidia           | 0.132343801 | 0.134258694 | Firmicutes     | Firmicutes     |
| Algibacter        | Flavobacterium     | 0.260303566 | 0.26381399  | Bacteroidetes  | Bacteroidetes  |
| Rahnella          | Pseudomonas        | 0.175575691 | 0.177830332 | Proteobacteria | Proteobacteria |
| Prauserella       | Actinobacteria     | 0.072679127 | 0.07359407  | Actinobacteria | Actinobacteria |
| Magnetospirillum  | Rhodospirillum     | 0.265465699 | 0.268658083 | Proteobacteria | Proteobacteria |
| Flavobacterium    | Myroides           | 0.260303566 | 0.263246422 | Bacteroidetes  | Bacteroidetes  |
| Polaribacter      | Flavobacterium     | 0.263900411 | 0.26679763  | Bacteroidetes  | Bacteroidetes  |
| Clostridium       | Mannheimia         | 0.062850588 | 0.063525919 | Firmicutes     | Proteobacteria |
| Celeribacter      | Antarctobacter     | 0.319579628 | 0.32290219  | Proteobacteria | Proteobacteria |
| Methylobacillus   | Pseudomonas        | 0.175575691 | 0.176983571 | Proteobacteria | Proteobacteria |
| Flavobacterium    | Dokdonia           | 0.263900411 | 0.266002513 | Bacteroidetes  | Bacteroidetes  |
| Hahella           | Pseudomonas        | 0.175575691 | 0.176894211 | Proteobacteria | Proteobacteria |
| Actinobacteria    | Parascardovia      | 0.072679127 | 0.073182232 | Actinobacteria | Actinobacteria |
| Kluyvera          | Cronobacter        | 0.511696136 | 0.514529795 | Proteobacteria | Proteobacteria |
| Mycoplasma        | Megasphaera        | 0.025477347 | 0.025616279 | Tenericutes    | Firmicutes     |
| Sulfuritalea      | Betaproteobacteria | 0.23303541  | 0.234149246 | Proteobacteria | Proteobacteria |
| Enterobacter      | synthetic          | 0.557933943 | 0.560574234 | Proteobacteria | Proteobacteria |
| Desulfovibrio     | Desulfarculus      | 0.143678238 | 0.144253227 | Proteobacteria | Proteobacteria |
| Cellvibrio        | Pseudomonas        | 0.175575691 | 0.176173081 | Proteobacteria | Proteobacteria |
| Mycoplasma        | Psychromonas       | 0.025477347 | 0.025544448 | Tenericutes    | Proteobacteria |
| Steroidobacter    | Pseudomonas        | 0.175575691 | 0.175937487 | Proteobacteria | Proteobacteria |
| Salmonella        | Enterobacter       | 0.557933943 | 0.559031393 | Proteobacteria | Proteobacteria |
| Amycolatopsis     | Actinobacteria     | 0.072679127 | 0.072801349 | Actinobacteria | Actinobacteria |
| Phaeobacter       | Leisingera         | 0.513279234 | 0.514045664 | Proteobacteria | Proteobacteria |
