# Supplementary material for: A New Genome-to-Genome Comparison Approach for Large-Scale Revisiting of Current Microbial Taxonomy
Source: MDPI journal article supplement (doi:10.3390/microorganisms7060161), 2019-06-03
Supplement: s1 [file s1]

**Table S3.** 2227 microbial genomes differ more than 2-fold between interphylum and intraphylum HCR.

| No. | File name (assembly accession)          | Genus           | Phylum         |
|-----|-----------------------------------------|-----------------|----------------|
| 1   | GCA_002276165.1_ASM227616v1_genomic.fna | Bacillus        | Firmicutes     |
| 2   | GCA_900186985.1_50377_C01_genomic.fna   | Staphylococcus  | Firmicutes     |
| 3   | GCA_900187285.1_51342_C02_genomic.fna   | Veillonella     | Firmicutes     |
| 4   | GCA_900187075.1_50432_F01_genomic.fna   | Staphylococcus  | Firmicutes     |
| 5   | GCA_000759555.1_ASM75955v1_genomic.fna  | Staphylococcus  | Firmicutes     |
| 6   | GCA_000025045.1_ASM2504v1_genomic.fna   | Lactococcus     | Firmicutes     |
| 7   | GCA_002208945.1_ASM220894v1_genomic.fna | Enterococcus    | Firmicutes     |
| 8   | GCA_000009645.1_ASM964v1_genomic.fna    | Staphylococcus  | Firmicutes     |
| 9   | GCA_001593785.1_ASM159378v1_genomic.fna | Bacillus        | Firmicutes     |
| 10  | GCA_000015525.1_ASM1552v1_genomic.fna   | Campylobacter   | Proteobacteria |
| 11  | GCA_001886635.1_ASM188663v1_genomic.fna | Enterococcus    | Firmicutes     |
| 12  | GCA_001865535.1_ASM186553v1_genomic.fna | Campylobacter   | Proteobacteria |
| 13  | GCA_000017485.1_ASM1748v1_genomic.fna   | Campylobacter   | Proteobacteria |
| 14  | GCA_001272835.1_ASM127283v1_genomic.fna | Mycoplasma      | Tenericutes    |
| 15  | GCA_000009665.1_ASM966v1_genomic.fna    | Staphylococcus  | Firmicutes     |
| 16  | GCA_000143205.1_ASM14320v1_genomic.fna  | Lactococcus     | Firmicutes     |
| 17  | GCA_001956655.2_ASM195665v2_genomic.fna | Staphylococcus  | Firmicutes     |
| 18  | GCA_000021205.1_ASM2120v1_genomic.fna   | Bacillus        | Firmicutes     |
| 19  | GCA_001596095.1_ASM159609v1_genomic.fna | Lactobacillus   | Firmicutes     |
| 20  | GCA_001579765.1_ASM157976v1_genomic.fna | Clostridium     | Firmicutes     |
| 21  | GCA_002220615.1_ASM222061v1_genomic.fna | Serratia        | Proteobacteria |
| 22  | GCA_000026705.1_ASM2670v1_genomic.fna   | Listeria        | Firmicutes     |
| 23  | GCA_000017965.1_ASM1796v1_genomic.fna   | Lysinibacillus  | Firmicutes     |
| 24  | GCA_000011285.1_ASM1128v1_genomic.fna   | Streptococcus   | Firmicutes     |
| 25  | GCA_000018985.1_ASM1898v1_genomic.fna   | Streptococcus   | Firmicutes     |
| 26  | GCA_001865555.1_ASM186555v1_genomic.fna | Campylobacter   | Proteobacteria |
| 27  | GCA_002355215.1_ASM235521v1_genomic.fna | Streptococcus   | Firmicutes     |
| 28  | GCA_000012645.1_ASM1264v1_genomic.fna   | Prochlorococcus | Cyanobacteria  |
| 29  | GCA_001990205.1_ASM199020v1_genomic.fna | Staphylococcus  | Firmicutes     |
| 30  | GCA_001023595.1_ASM102359v1_genomic.fna | Bacillus        | Firmicutes     |
| 31  | GCA_000090965.1_ASM9096v1_genomic.fna   | Buchnera        | Proteobacteria |

32 GCA\_001536925.1\_BMC\_PRJEB12378v1\_genomic.fna  
 33 GCA\_000400855.1\_ASM40085v1\_genomic.fna  
 34 GCA\_000168355.3\_ASM16835v3\_genomic.fna  
 35 GCA\_000017425.1\_ASM1742v1\_genomic.fna  
 36 GCA\_002442895.1\_ASM244289v1\_genomic.fna  
 37 GCA\_002441935.1\_ASM244193v1\_genomic.fna  
 38 GCA\_000024945.1\_ASM2494v1\_genomic.fna  
 39 GCA\_002369955.1\_ASM236995v1\_genomic.fna  
 40 GCA\_000178835.2\_ASM17883v2\_genomic.fna  
 41 GCA\_000092505.1\_ASM9250v1\_genomic.fna  
 42 GCA\_000400875.1\_ASM40087v1\_genomic.fna  
 43 GCA\_002220635.1\_ASM222063v1\_genomic.fna  
 44 GCA\_000022865.1\_ASM2286v1\_genomic.fna  
 45 GCA\_001617525.1\_ASM161752v1\_genomic.fna  
 46 GCA\_001272855.1\_ASM127285v1\_genomic.fna  
 47 GCA\_000410995.1\_ASM41099v1\_genomic.fna  
 48 GCA\_001191605.1\_ASM119160v1\_genomic.fna  
 49 GCA\_000191545.1\_ASM19154v1\_genomic.fna  
 50 GCA\_002442935.1\_ASM244293v1\_genomic.fna  
 51 GCA\_000196215.1\_ASM19621v1\_genomic.fna  
 52 GCA\_000302475.3\_ASM30247v3\_genomic.fna  
 53 GCA\_002074075.1\_ASM207407v1\_genomic.fna  
 54 GCA\_000182875.1\_ASM18287v1\_genomic.fna  
 55 GCA\_000190515.1\_ASM19051v1\_genomic.fna  
 56 GCA\_000448685.2\_ASM44868v2\_genomic.fna  
 57 GCA\_000166415.1\_ASM16641v1\_genomic.fna  
 58 GCA\_002080475.1\_ASM208047v1\_genomic.fna  
 59 GCA\_900187165.1\_52121\_G02\_genomic.fna  
 60 GCA\_001936295.1\_ASM193629v1\_genomic.fna  
 61 GCA\_000463395.1\_ASM46339v1\_genomic.fna  
 62 GCA\_002021945.1\_ASM202194v1\_genomic.fna  
 63 GCA\_000025085.1\_ASM2508v1\_genomic.fna  
 64 GCA\_000147695.3\_ASM14769v3\_genomic.fna  
 65 GCA\_002355135.1\_ASM235513v1\_genomic.fna

|                    |                |
|--------------------|----------------|
| Bacillus           | Firmicutes     |
| Mycoplasma         | Tenericutes    |
| Streptococcus      | Firmicutes     |
| Bacillus           | Firmicutes     |
| Staphylococcus     | Firmicutes     |
| Mesoplasma         | Tenericutes    |
| Veillonella        | Firmicutes     |
| Ichthyobacterium   | Bacteroidetes  |
| Clostridium        | Firmicutes     |
| Leuconostoc        | Firmicutes     |
| Fusobacterium      | Fusobacteria   |
| Serratia           | Proteobacteria |
| Bacillus           | Firmicutes     |
| Lactobacillus      | Firmicutes     |
| Mycoplasma         | Tenericutes    |
| Lactobacillus      | Firmicutes     |
| Bacillus           | Firmicutes     |
| Lactobacillus      | Firmicutes     |
| Staphylococcus     | Firmicutes     |
| Borrelia           | Spirochaetes   |
| Streptococcus      | Firmicutes     |
| Bacillus           | Firmicutes     |
| Streptococcus      | Firmicutes     |
| Bacillus           | Firmicutes     |
| Streptococcus      | Firmicutes     |
| Halanaerobium      | Firmicutes     |
| Clostridium        | Firmicutes     |
| Clostridium        | Firmicutes     |
| Borrelia           | Spirochaetes   |
| Streptococcus      | Firmicutes     |
| Campylobacter      | Proteobacteria |
| Staphylococcus     | Firmicutes     |
| Thermoanaerobacter | Firmicutes     |
| Blattabacterium    | Bacteroidetes  |



|     |                                                 |                 |                |
|-----|-------------------------------------------------|-----------------|----------------|
| 100 | GCA_000009085.1_ASM908v1_genomic.fna            | Campylobacter   | Proteobacteria |
| 101 | GCA_000013425.1_ASM1342v1_genomic.fna           | Staphylococcus  | Firmicutes     |
| 102 | GCA_000007645.1_ASM764v1_genomic.fna            | Staphylococcus  | Firmicutes     |
| 103 | GCA_000006865.1_ASM686v1_genomic.fna            | Lactococcus     | Firmicutes     |
| 104 | GCA_000007825.1_ASM782v1_genomic.fna            | Bacillus        | Firmicutes     |
| 105 | GCA_000013285.1_ASM1328v1_genomic.fna           | Clostridium     | Firmicutes     |
| 106 | GCA_900129335.1_PP_HGAG_QV30_2SC_T4_genomic.fna | Staphylococcus  | Firmicutes     |
| 107 | GCA_000196035.1_ASM19603v1_genomic.fna          | Listeria        | Firmicutes     |
| 108 | GCA_000007925.1_ASM792v1_genomic.fna            | Prochlorococcus | Cyanobacteria  |
| 109 | GCA_000007365.1_ASM736v1_genomic.fna            | Buchnera        | Proteobacteria |
| 110 | GCA_000006785.2_ASM678v2_genomic.fna            | Streptococcus   | Firmicutes     |
| 111 | GCA_000007045.1_ASM704v1_genomic.fna            | Streptococcus   | Firmicutes     |
| 112 | GCA_000007325.1_ASM732v1_genomic.fna            | Fusobacterium   | Fusobacteria   |
| 113 | GCA_000007845.1_ASM784v1_genomic.fna            | Bacillus        | Firmicutes     |
| 114 | GCA_000007265.1_ASM726v1_genomic.fna            | Streptococcus   | Firmicutes     |
| 115 | GCA_000816945.1_ASM81694v1_genomic.fna          | Clostridium     | Firmicutes     |
| 116 | GCA_000759485.1_ASM75948v1_genomic.fna          | Campylobacter   | Proteobacteria |
| 117 | GCA_000953275.1_CD630DERM_genomic.fna           | Clostridioides  | Firmicutes     |
| 118 | GCA_000019885.1_ASM1988v1_genomic.fna           | Coxiella        | Proteobacteria |
| 119 | GCA_000309565.2_ASM30956v2_genomic.fna          | Lactobacillus   | Firmicutes     |
| 120 | GCA_001469775.1_ASM146977v1_genomic.fna         | Lactobacillus   | Firmicutes     |
| 121 | GCA_000953235.1_ILRI181.1_genomic.fna           | Mycoplasma      | Tenericutes    |
| 122 | GCA_001742205.1_ASM174220v1_genomic.fna         | Lactobacillus   | Firmicutes     |
| 123 | GCA_000253075.1_ASM25307v1_genomic.fna          | Mycoplasma      | Tenericutes    |
| 124 | GCA_000227465.1_ASM22746v1_genomic.fna          | Bacillus        | Firmicutes     |
| 125 | GCA_000283815.1_ASM28381v1_genomic.fna          | Rickettsia      | Proteobacteria |
| 126 | GCA_000422165.1_ASM42216v1_genomic.fna          | Lactobacillus   | Firmicutes     |
| 127 | GCA_000281195.1_ASM28119v1_genomic.fna          | Enterococcus    | Firmicutes     |
| 128 | GCA_000277205.1_ASM27720v1_genomic.fna          | Rickettsia      | Proteobacteria |
| 129 | GCA_000017025.1_ASM1702v1_genomic.fna           | Clostridium     | Firmicutes     |
| 130 | GCA_000444465.1_ASM44446v1_genomic.fna          | Borrelia        | Spirochaetes   |
| 131 | GCA_000737555.1_ASM73755v1_genomic.fna          | Enterococcus    | Firmicutes     |
| 132 | GCA_002104575.1_ASM210457v1_genomic.fna         | Bacillus        | Firmicutes     |
| 133 | GCA_001922405.1_ASM192240v1_genomic.fna         | Staphylococcus  | Firmicutes     |

134 GCA\_000242855.2\_ASM24285v2\_genomic.fna  
 135 GCA\_001483985.1\_ASM148398v1\_genomic.fna  
 136 GCA\_000817065.1\_ASM81706v1\_genomic.fna  
 137 GCA\_000418475.1\_ASM41847v1\_genomic.fna  
 138 GCA\_001991075.1\_ASM199107v1\_genomic.fna  
 139 GCA\_001455105.1\_ASM145510v1\_genomic.fna  
 140 GCA\_000696505.1\_ASM69650v1\_genomic.fna  
 141 GCA\_000833295.1\_ASM83329v1\_genomic.fna  
 142 GCA\_000319675.2\_ASM31967v2\_genomic.fna  
 143 GCA\_000829335.1\_ASM82933v1\_genomic.fna  
 144 GCA\_000225265.1\_ASM22526v1\_genomic.fna  
 145 GCA\_002386285.1\_ASM238628v1\_genomic.fna  
 146 GCA\_000283695.1\_ASM28369v1\_genomic.fna  
 147 GCA\_002117325.1\_ASM211732v1\_genomic.fna  
 148 GCA\_001022215.1\_ASM102221v1\_genomic.fna  
 149 GCA\_002327185.1\_ASM232718v1\_genomic.fna  
 150 GCA\_000816305.1\_ASM81630v1\_genomic.fna  
 151 GCA\_000085865.1\_ASM8586v1\_genomic.fna  
 152 GCA\_000024105.1\_ASM2410v1\_genomic.fna  
 153 GCA\_000191045.1\_ASM19104v1\_genomic.fna  
 154 GCA\_001583825.1\_ASM158382v1\_genomic.fna  
 155 GCA\_000392485.2\_ASM39248v2\_genomic.fna  
 156 GCA\_002286215.1\_ASM228621v1\_genomic.fna  
 157 GCA\_001559115.1\_ASM155911v1\_genomic.fna  
 158 GCA\_002202155.1\_ASM220215v1\_genomic.fna  
 159 GCA\_002003345.1\_ASM200334v1\_genomic.fna  
 160 GCA\_001723525.1\_ASM172352v1\_genomic.fna  
 161 GCA\_001514455.1\_ASM151445v1\_genomic.fna  
 162 GCA\_001698145.1\_ASM169814v1\_genomic.fna  
 163 GCA\_002290085.1\_ASM229008v1\_genomic.fna  
 164 GCA\_000213825.1\_ASM21382v1\_genomic.fna  
 165 GCA\_001484725.1\_ASM148472v1\_genomic.fna  
 166 GCA\_002003285.1\_ASM200328v1\_genomic.fna  
 167 GCA\_000286675.1\_ASM28667v1\_genomic.fna

|                    |                |
|--------------------|----------------|
| Bacillus           | Firmicutes     |
| Campylobacter      | Proteobacteria |
| Streptococcus      | Firmicutes     |
| Lactobacillus      | Firmicutes     |
| Clostridium        | Firmicutes     |
| Fusobacterium      | Fusobacteria   |
| Streptococcus      | Firmicutes     |
| Francisella        | Proteobacteria |
| Mycoplasma         | Tenericutes    |
| Mycoplasma         | Tenericutes    |
| Bacillus           | Firmicutes     |
| Streptococcus      | Firmicutes     |
| Bacillus           | Firmicutes     |
| Lactobacillus      | Firmicutes     |
| Serratia           | Proteobacteria |
| Clostridium        | Firmicutes     |
| Campylobacter      | Proteobacteria |
| Mycoplasma         | Tenericutes    |
| Anaerococcus       | Firmicutes     |
| Desulfurobacterium | Aquificae      |
| Leuconostoc        | Firmicutes     |
| Lactobacillus      | Firmicutes     |
| Lactobacillus      | Firmicutes     |
| Staphylococcus     | Firmicutes     |
| Pediococcus        | Firmicutes     |
| Clostridium        | Firmicutes     |
| Lactobacillus      | Firmicutes     |
| Serratia           | Proteobacteria |
| Leuconostoc        | Firmicutes     |
| Mesoplasma         | Tenericutes    |
| Streptococcus      | Firmicutes     |
| Clostridium        | Firmicutes     |
| Clostridium        | Firmicutes     |
| Mycoplasma         | Tenericutes    |

168 GCA\_000583795.1\_ASM58379v1\_genomic.fna  
 169 GCA\_001043135.1\_ASM104313v1\_genomic.fna  
 170 GCA\_000816405.1\_ASM81640v1\_genomic.fna  
 171 GCA\_001039495.1\_ASM103949v1\_genomic.fna  
 172 GCA\_001308145.2\_ASM130814v2\_genomic.fna  
 173 GCA\_002442915.1\_ASM244291v1\_genomic.fna  
 174 GCA\_001543205.1\_ASM154320v1\_genomic.fna  
 175 GCA\_000807295.1\_ASM80729v1\_genomic.fna  
 176 GCA\_000221985.1\_ASM22198v1\_genomic.fna  
 177 GCA\_000385925.1\_ASM38592v1\_genomic.fna  
 178 GCA\_002250055.1\_ASM225005v1\_genomic.fna  
 179 GCA\_000763515.1\_ASM76351v1\_genomic.fna  
 180 GCA\_000024565.1\_ASM2456v1\_genomic.fna  
 181 GCA\_000975245.1\_ASM97524v1\_genomic.fna  
 182 GCA\_000196855.1\_ASM19685v1\_genomic.fna  
 183 GCA\_002381265.1\_ASM238126v1\_genomic.fna  
 184 GCA\_000732905.1\_ASM73290v1\_genomic.fna  
 185 GCA\_001886875.1\_ASM188687v1\_genomic.fna  
 186 GCA\_001714745.1\_ASM171474v1\_genomic.fna  
 187 GCA\_000092845.1\_ASM9284v1\_genomic.fna  
 188 GCA\_000185885.1\_ASM18588v1\_genomic.fna  
 189 GCA\_000023905.1\_ASM2390v1\_genomic.fna  
 190 GCA\_001687665.2\_ASM168766v2\_genomic.fna  
 191 GCA\_000008205.1\_ASM820v1\_genomic.fna  
 192 GCA\_000026745.1\_ASM2674v1\_genomic.fna  
 193 GCA\_000011645.1\_ASM1164v1\_genomic.fna  
 194 GCA\_000253395.1\_ASM25339v1\_genomic.fna  
 195 GCA\_000016825.1\_ASM1682v1\_genomic.fna  
 196 GCA\_001578205.1\_ASM157820v1\_genomic.fna  
 197 GCA\_000027325.1\_ASM2732v1\_genomic.fna  
 198 GCA\_000008505.1\_ASM850v1\_genomic.fna  
 199 GCA\_000785515.1\_ASM78551v1\_genomic.fna  
 200 GCA\_000008985.1\_ASM898v1\_genomic.fna  
 201 GCA\_000056065.1\_ASM5606v1\_genomic.fna

|                 |                |
|-----------------|----------------|
| Campylobacter   | Proteobacteria |
| Mycoplasma      | Tenericutes    |
| Campylobacter   | Proteobacteria |
| Bacillus        | Firmicutes     |
| Weissella       | Firmicutes     |
| Staphylococcus  | Firmicutes     |
| Aerococcus      | Firmicutes     |
| Borrelia        | Spirochaetes   |
| Streptococcus   | Firmicutes     |
| Streptococcus   | Firmicutes     |
| Bacillus        | Firmicutes     |
| Listeria        | Firmicutes     |
| Streptobacillus | Fusobacteria   |
| Serratia        | Proteobacteria |
| Leuconostoc     | Firmicutes     |
| Brochothrix     | Firmicutes     |
| Weissella       | Firmicutes     |
| Clostridium     | Firmicutes     |
| Lactobacillus   | Firmicutes     |
| Brachyspira     | Spirochaetes   |
| Staphylococcus  | Firmicutes     |
| Leptotrichia    | Fusobacteria   |
| Planococcus     | Firmicutes     |
| Mycoplasma      | Tenericutes    |
| Streptococcus   | Firmicutes     |
| Bacillus        | Firmicutes     |
| Streptococcus   | Firmicutes     |
| Lactobacillus   | Firmicutes     |
| Bacillus        | Firmicutes     |
| Mycoplasma      | Tenericutes    |
| Bacillus        | Firmicutes     |
| Streptococcus   | Firmicutes     |
| Francisella     | Proteobacteria |
| Lactobacillus   | Firmicutes     |

202 GCA\_000063605.1\_ASM6360v1\_genomic.fna  
 203 GCA\_000012765.1\_ASM1276v1\_genomic.fna  
 204 GCA\_000495505.1\_ASM49550v1\_genomic.fna  
 205 GCA\_000027165.1\_ASM2716v1\_genomic.fna  
 206 GCA\_000512775.1\_ASM51277v1\_genomic.fna  
 207 GCA\_000009205.1\_ASM920v1\_genomic.fna  
 208 GCA\_000014385.1\_ASM1438v1\_genomic.fna  
 209 GCA\_000007765.2\_ASM776v2\_genomic.fna  
 210 GCA\_000747375.1\_ASM74737v1\_genomic.fna  
 211 GCA\_002128265.1\_ASM212826v1\_genomic.fna  
 212 GCA\_001889385.1\_ASM188938v1\_genomic.fna  
 213 GCA\_002208785.1\_ASM220878v1\_genomic.fna  
 214 GCA\_000019245.3\_ASM1924v3\_genomic.fna  
 215 GCA\_000012385.1\_ASM1238v1\_genomic.fna  
 216 GCA\_000009045.1\_ASM904v1\_genomic.fna  
 217 GCA\_001308285.1\_ASM130828v1\_genomic.fna  
 218 GCA\_000017445.3\_ASM1744v3\_genomic.fna  
 219 GCA\_000747335.1\_ASM74733v1\_genomic.fna  
 220 GCA\_001635895.1\_ASM163589v1\_genomic.fna  
 221 GCA\_002277915.1\_ASM227791v1\_genomic.fna  
 222 GCA\_000304735.1\_ASM30473v1\_genomic.fna  
 223 GCA\_000269925.1\_ASM26992v1\_genomic.fna  
 224 GCA\_000597965.1\_ASM59796v1\_genomic.fna  
 225 GCA\_000626615.1\_ASM62661v1\_genomic.fna  
 226 GCA\_000582845.1\_SV\_1\_genomic.fna  
 227 GCA\_001506345.1\_ASM150634v1\_genomic.fna  
 228 GCA\_000010145.1\_ASM1014v1\_genomic.fna  
 229 GCA\_000016505.1\_ASM1650v1\_genomic.fna  
 230 GCA\_000011445.1\_ASM1144v1\_genomic.fna  
 231 GCA\_002290105.1\_ASM229010v1\_genomic.fna  
 232 GCA\_000577745.1\_6179\_18022011\_genomic.fna  
 233 GCA\_001506305.1\_ASM150630v1\_genomic.fna  
 234 GCA\_002356575.1\_ASM235657v1\_genomic.fna  
 235 GCA\_001889625.1\_ASM188962v1\_genomic.fna

|                |                |
|----------------|----------------|
| Mycoplasma     | Tenericutes    |
| Mycoplasma     | Tenericutes    |
| Campylobacter  | Proteobacteria |
| Streptococcus  | Firmicutes     |
| Bacillus       | Firmicutes     |
| Clostridioides | Firmicutes     |
| Oenococcus     | Firmicutes     |
| Coxiella       | Proteobacteria |
| Bacillus       | Firmicutes     |
| Mycoplasma     | Tenericutes    |
| Bacillus       | Firmicutes     |
| Bacillus       | Firmicutes     |
| Lactobacillus  | Firmicutes     |
| Rickettsia     | Proteobacteria |
| Bacillus       | Firmicutes     |
| Lactobacillus  | Firmicutes     |
| Rickettsia     | Proteobacteria |
| Bacillus       | Firmicutes     |
| Streptococcus  | Firmicutes     |
| Bacillus       | Firmicutes     |
| Borrelia       | Spirochaetes   |
| Lactococcus    | Firmicutes     |
| Staphylococcus | Firmicutes     |
| Staphylococcus | Firmicutes     |
| Listeria       | Firmicutes     |
| Campylobacter  | Proteobacteria |
| Lactobacillus  | Firmicutes     |
| Clostridium    | Firmicutes     |
| Mycoplasma     | Tenericutes    |
| Bacillus       | Firmicutes     |
| Listeria       | Firmicutes     |
| Campylobacter  | Proteobacteria |
| Bacillus       | Firmicutes     |
| Bacillus       | Firmicutes     |

|     |                                            |                |                |
|-----|--------------------------------------------|----------------|----------------|
| 236 | GCA_000017045.1_ASM1704v1_genomic.fna      | Clostridium    | Firmicutes     |
| 237 | GCA_001635935.1_ASM163593v1_genomic.fna    | Streptococcus  | Firmicutes     |
| 238 | GCA_000195735.1_ASM19573v1_genomic.fna     | Rickettsia     | Proteobacteria |
| 239 | GCA_000008685.2_ASM868v2_genomic.fna       | Borrelia       | Spirochaetes   |
| 240 | GCA_002147855.1_ASM214785v1_genomic.fna    | Mycoplasma     | Tenericutes    |
| 241 | GCA_001890405.1_ASM189040v1_genomic.fna    | Bacillus       | Firmicutes     |
| 242 | GCA_002128285.1_ASM212828v1_genomic.fna    | Mycoplasma     | Tenericutes    |
| 243 | GCA_001635975.1_ASM163597v1_genomic.fna    | Streptococcus  | Firmicutes     |
| 244 | GCA_000600015.1_ASM60001v1_genomic.fna     | Listeria       | Firmicutes     |
| 245 | GCA_000695875.1_ASM69587v1_genomic.fna     | Staphylococcus | Firmicutes     |
| 246 | GCA_001506385.1_ASM150638v1_genomic.fna    | Campylobacter  | Proteobacteria |
| 247 | GCA_000613085.1_R479A_18022011_genomic.fna | Listeria       | Firmicutes     |
| 248 | GCA_000695215.1_ASM69521v1_genomic.fna     | Staphylococcus | Firmicutes     |
| 249 | GCA_001506365.1_ASM150636v1_genomic.fna    | Campylobacter  | Proteobacteria |
| 250 | GCA_001902555.1_ASM190255v1_genomic.fna    | Bacillus       | Firmicutes     |
| 251 | GCA_001638845.2_ASM163884v2_genomic.fna    | Streptococcus  | Firmicutes     |
| 252 | GCA_002055965.1_ASM205596v1_genomic.fna    | Bacillus       | Firmicutes     |
| 253 | GCA_002355695.1_ASM235569v1_genomic.fna    | Mycoplasma     | Tenericutes    |
| 254 | GCA_002355715.1_ASM235571v1_genomic.fna    | Mycoplasma     | Tenericutes    |
| 255 | GCA_900016775.1_STsPazieg1.0_genomic.fna   | Serratia       | Proteobacteria |
| 256 | GCA_002356055.1_ASM235605v1_genomic.fna    | Streptococcus  | Firmicutes     |
| 257 | GCA_000496815.1_ASM49681v1_genomic.fna     | Mycoplasma     | Tenericutes    |
| 258 | GCA_001191565.1_ASM119156v1_genomic.fna    | Lactobacillus  | Firmicutes     |
| 259 | GCA_002370375.1_ASM237037v1_genomic.fna    | Lactobacillus  | Firmicutes     |
| 260 | GCA_000681515.1_ASM68151v1_genomic.fna     | Listeria       | Firmicutes     |
| 261 | GCA_000737615.1_ASM73761v1_genomic.fna     | Staphylococcus | Firmicutes     |
| 262 | GCA_001678885.1_ASM167888v1_genomic.fna    | Streptococcus  | Firmicutes     |
| 263 | GCA_002174215.1_ASM217421v1_genomic.fna    | Pediococcus    | Firmicutes     |
| 264 | GCA_002073395.1_ASM207339v1_genomic.fna    | Staphylococcus | Firmicutes     |
| 265 | GCA_001412635.1_ASM141263v1_genomic.fna    | Streptococcus  | Firmicutes     |
| 266 | GCA_002688645.1_ASM268864v1_genomic.fna    | Bacillus       | Firmicutes     |
| 267 | GCA_002243305.1_ASM224330v1_genomic.fna    | Weissella      | Firmicutes     |
| 268 | GCA_001685665.2_ASM168566v2_genomic.fna    | Staphylococcus | Firmicutes     |
| 269 | GCA_001477575.1_ASM147757v1_genomic.fna    | Streptococcus  | Firmicutes     |



270 GCA\_002356075.1\_ASM235607v1\_genomic.fna  
 271 GCA\_002357155.1\_ASM235715v1\_genomic.fna  
 272 GCA\_900187085.1\_50624\_E01\_genomic.fna  
 273 GCA\_002224505.1\_ASM222450v1\_genomic.fna  
 274 GCA\_001611155.1\_ASM161115v1\_genomic.fna  
 275 GCA\_001938665.1\_ASM193866v1\_genomic.fna  
 276 GCA\_001856645.1\_ASM185664v1\_genomic.fna  
 277 GCA\_002077215.1\_ASM207721v1\_genomic.fna  
 278 GCA\_001682235.1\_ASM168223v1\_genomic.fna  
 279 GCA\_001042565.2\_ASM104256v2\_genomic.fna  
 280 GCA\_000214235.1\_ASM21423v1\_genomic.fna  
 281 GCA\_001663115.1\_ASM166311v1\_genomic.fna  
 282 GCA\_001663755.1\_ASM166375v1\_genomic.fna  
 283 GCA\_000271325.1\_ASM27132v1\_genomic.fna  
 284 GCA\_002003385.1\_ASM200338v1\_genomic.fna  
 285 GCA\_000341875.1\_ASM34187v1\_genomic.fna  
 286 GCA\_001548255.1\_ASM154825v1\_genomic.fna  
 287 GCA\_002216705.1\_ASM221670v1\_genomic.fna  
 288 GCA\_000505725.1\_ASM50572v1\_genomic.fna  
 289 GCA\_001442475.1\_ASM144247v1\_genomic.fna  
 290 GCA\_000988065.1\_ASM98806v1\_genomic.fna  
 291 GCA\_002022005.1\_ASM202200v1\_genomic.fna  
 292 GCA\_000455565.1\_ucmb5033v1\_genomic.fna  
 293 GCA\_001275365.1\_ASM127536v1\_genomic.fna  
 294 GCA\_001663135.1\_ASM166313v1\_genomic.fna  
 295 GCA\_900187055.1\_50377\_D01\_genomic.fna  
 296 GCA\_001267865.1\_ASM126786v1\_genomic.fna  
 297 GCA\_001643975.1\_ASM164397v1\_genomic.fna  
 298 GCA\_000747585.1\_ASM74758v1\_genomic.fna  
 299 GCA\_002220755.1\_ASM222075v1\_genomic.fna  
 300 GCA\_001273795.1\_ASM127379v1\_genomic.fna  
 301 GCA\_001190905.2\_ASM119090v2\_genomic.fna  
 302 GCA\_002357175.1\_ASM235717v1\_genomic.fna  
 303 GCA\_001856695.1\_ASM185669v1\_genomic.fna

|                |                |
|----------------|----------------|
| Mycoplasma     | Tenericutes    |
| Rickettsia     | Proteobacteria |
| Streptococcus  | Firmicutes     |
| Lactobacillus  | Firmicutes     |
| Pediococcus    | Firmicutes     |
| Bacillus       | Firmicutes     |
| Clostridium    | Firmicutes     |
| Bacillus       | Firmicutes     |
| Staphylococcus | Firmicutes     |
| Francisella    | Proteobacteria |
| Serratia       | Proteobacteria |
| Serratia       | Proteobacteria |
| Lactobacillus  | Firmicutes     |
| Solibacillus   | Firmicutes     |
| Clostridium    | Firmicutes     |
| Bacillus       | Firmicutes     |
| Staphylococcus | Firmicutes     |
| Enterococcus   | Firmicutes     |
| Francisella    | Proteobacteria |
| Rickettsia     | Proteobacteria |
| Mycoplasma     | Tenericutes    |
| Campylobacter  | Proteobacteria |
| Bacillus       | Firmicutes     |
| Francisella    | Proteobacteria |
| Serratia       | Proteobacteria |
| Staphylococcus | Firmicutes     |
| Enterococcus   | Firmicutes     |
| Campylobacter  | Proteobacteria |
| Melissococcus  | Firmicutes     |
| Campylobacter  | Proteobacteria |
| Rickettsia     | Proteobacteria |
| Francisella    | Proteobacteria |
| Rickettsia     | Proteobacteria |
| Clostridium    | Firmicutes     |

|     |                                         |                 |                |
|-----|-----------------------------------------|-----------------|----------------|
| 304 | GCA_000214785.1_ASM21478v1_genomic.fna  | Lactobacillus   | Firmicutes     |
| 305 | GCA_000221205.1_ASM22120v1_genomic.fna  | Rickettsia      | Proteobacteria |
| 306 | GCA_002003305.1_ASM200330v1_genomic.fna | Clostridium     | Firmicutes     |
| 307 | GCA_001244395.1_ASM124439v1_genomic.fna | Lactobacillus   | Firmicutes     |
| 308 | GCA_001705605.1_ASM170560v1_genomic.fna | Mycoplasma      | Tenericutes    |
| 309 | GCA_002356695.1_ASM235669v1_genomic.fna | Rickettsia      | Proteobacteria |
| 310 | GCA_002243645.1_ASM224364v1_genomic.fna | Bacillus        | Firmicutes     |
| 311 | GCA_001702215.1_ASM170221v1_genomic.fna | Pediococcus     | Firmicutes     |
| 312 | GCA_002028345.1_ASM202834v1_genomic.fna | Spiroplasma     | Tenericutes    |
| 313 | GCA_000219805.1_ASM21980v1_genomic.fna  | Weissella       | Firmicutes     |
| 314 | GCA_000223215.1_ASM22321v1_genomic.fna  | Brachyspira     | Spirochaetes   |
| 315 | GCA_000517365.1_ASM51736v1_genomic.fna  | Spiroplasma     | Tenericutes    |
| 316 | GCA_000270165.1_ASM27016v1_genomic.fna  | Streptococcus   | Firmicutes     |
| 317 | GCA_001697145.1_ASM169714v1_genomic.fna | Streptococcus   | Firmicutes     |
| 318 | GCA_002250095.2_ASM225009v2_genomic.fna | Staphylococcus  | Firmicutes     |
| 319 | GCA_000271405.2_ASM27140v2_genomic.fna  | Enterococcus    | Firmicutes     |
| 320 | GCA_001611035.1_ASM161103v1_genomic.fna | Pediococcus     | Firmicutes     |
| 321 | GCA_000875755.1_ASM87575v1_genomic.fna  | Mycoplasma      | Tenericutes    |
| 322 | GCA_000283615.1_ASM28361v1_genomic.fna  | Tetragenococcus | Firmicutes     |
| 323 | GCA_000389635.1_ASM38963v1_genomic.fna  | Clostridium     | Firmicutes     |
| 324 | GCA_000222305.1_ASM22230v1_genomic.fna  | Borrelia        | Spirochaetes   |
| 325 | GCA_000252365.1_ASM25236v1_genomic.fna  | Rickettsia      | Proteobacteria |
| 326 | GCA_000709415.1_ASM70941v1_genomic.fna  | Staphylococcus  | Firmicutes     |
| 327 | GCA_002176835.1_ASM217683v1_genomic.fna | Lactobacillus   | Firmicutes     |
| 328 | GCA_002209165.1_ASM220916v1_genomic.fna | Staphylococcus  | Firmicutes     |
| 329 | GCA_001641305.1_ASM164130v1_genomic.fna | Enterococcus    | Firmicutes     |
| 330 | GCA_002224425.1_ASM222442v1_genomic.fna | Lactobacillus   | Firmicutes     |
| 331 | GCA_001712815.1_ASM171281v1_genomic.fna | Tetragenococcus | Firmicutes     |
| 332 | GCA_900116935.1_Chromosome_genomic.fna  | Lactobacillus   | Firmicutes     |
| 333 | GCA_002211885.1_ASM221188v1_genomic.fna | Lactobacillus   | Firmicutes     |
| 334 | GCA_001663835.1_ASM166383v1_genomic.fna | Lactobacillus   | Firmicutes     |
| 335 | GCA_000724485.1_ASM72448v1_genomic.fna  | Bacillus        | Firmicutes     |
| 336 | GCA_000284055.1_ASM28405v1_genomic.fna  | Rickettsia      | Proteobacteria |
| 337 | GCA_000283975.1_ASM28397v1_genomic.fna  | Melissococcus   | Firmicutes     |

338 GCA\_002706745.1\_ASM270674v1\_genomic.fna  
 339 GCA\_001611135.1\_ASM161113v1\_genomic.fna  
 340 GCA\_000189495.1\_ASM18949v1\_genomic.fna  
 341 GCA\_000807255.1\_ASM80725v1\_genomic.fna  
 342 GCA\_000283595.1\_ASM28359v1\_genomic.fna  
 343 GCA\_001543105.1\_ASM154310v1\_genomic.fna  
 344 GCA\_000706685.1\_ASM70668v1\_genomic.fna  
 345 GCA\_000237845.1\_ASM23784v1\_genomic.fna  
 346 GCA\_000007785.1\_ASM778v1\_genomic.fna  
 347 GCA\_000317855.1\_ASM31785v1\_genomic.fna  
 348 GCA\_001922545.1\_ASM192254v1\_genomic.fna  
 349 GCA\_000196735.1\_ASM19673v1\_genomic.fna  
 350 GCA\_000007465.2\_ASM746v2\_genomic.fna  
 351 GCA\_000174395.2\_ASM17439v2\_genomic.fna  
 352 GCA\_000832605.1\_ASM83260v1\_genomic.fna  
 353 GCA\_000026605.1\_ASM2660v1\_genomic.fna  
 354 GCA\_000834965.1\_ASM83496v1\_genomic.fna  
 355 GCA\_000026505.1\_ASM2650v1\_genomic.fna  
 356 GCA\_000019285.1\_ASM1928v1\_genomic.fna  
 357 GCA\_001558875.1\_ASM155887v1\_genomic.fna  
 358 GCA\_000157355.2\_ASM15735v2\_genomic.fna  
 359 GCA\_000973705.1\_ASM97370v1\_genomic.fna  
 360 GCA\_000246835.1\_ASM24683v1\_genomic.fna  
 361 GCA\_000800295.1\_ASM80029v1\_genomic.fna  
 362 GCA\_001506405.1\_ASM150640v1\_genomic.fna  
 363 GCA\_001506425.1\_ASM150642v1\_genomic.fna  
 364 GCA\_000746505.1\_ASM74650v1\_genomic.fna  
 365 GCA\_000007025.1\_ASM702v1\_genomic.fna  
 366 GCA\_002055535.1\_NCTC8198\_genomic.fna  
 367 GCA\_000017005.1\_ASM1700v1\_genomic.fna  
 368 GCA\_000008765.1\_ASM876v1\_genomic.fna  
 369 GCA\_000014425.1\_ASM1442v1\_genomic.fna  
 370 GCA\_000746625.1\_ASM74662v1\_genomic.fna  
 371 GCA\_002096095.1\_ASM209609v1\_genomic.fna

|                |                |
|----------------|----------------|
| Lactobacillus  | Firmicutes     |
| Pediococcus    | Firmicutes     |
| Staphylococcus | Firmicutes     |
| Clostridium    | Firmicutes     |
| Rickettsia     | Proteobacteria |
| Aerococcus     | Firmicutes     |
| Staphylococcus | Firmicutes     |
| Rickettsia     | Proteobacteria |
| Enterococcus   | Firmicutes     |
| Streptococcus  | Firmicutes     |
| Borrelia       | Spirochaetes   |
| Bacillus       | Firmicutes     |
| Streptococcus  | Firmicutes     |
| Enterococcus   | Firmicutes     |
| Bacillus       | Firmicutes     |
| Streptococcus  | Firmicutes     |
| Francisella    | Proteobacteria |
| Lactobacillus  | Firmicutes     |
| Francisella    | Proteobacteria |
| Enterococcus   | Firmicutes     |
| Enterococcus   | Firmicutes     |
| Clostridium    | Firmicutes     |
| Streptococcus  | Firmicutes     |
| Parvimonas     | Firmicutes     |
| Campylobacter  | Proteobacteria |
| Campylobacter  | Proteobacteria |
| Staphylococcus | Firmicutes     |
| Rickettsia     | Proteobacteria |
| Streptococcus  | Firmicutes     |
| Streptococcus  | Firmicutes     |
| Clostridium    | Firmicutes     |
| Lactobacillus  | Firmicutes     |
| Listeria       | Firmicutes     |
| Bacillus       | Firmicutes     |

|     |                                         |                |                |
|-----|-----------------------------------------|----------------|----------------|
| 372 | GCA_000195795.1_ASM19579v1_genomic.fna  | Listeria       | Firmicutes     |
| 373 | GCA_000027345.1_ASM2734v1_genomic.fna   | Mycoplasma     | Tenericutes    |
| 374 | GCA_000195875.1_ASM19587v1_genomic.fna  | Mycoplasma     | Tenericutes    |
| 375 | GCA_000011225.1_ASM1122v1_genomic.fna   | Mycoplasma     | Tenericutes    |
| 376 | GCA_002072735.1_ASM207273v1_genomic.fna | Bacillus       | Firmicutes     |
| 377 | GCA_000359545.5_G255_GS_genomic.fna     | Coxiella       | Proteobacteria |
| 378 | GCA_002163545.1_ASM216354v1_genomic.fna | Streptococcus  | Firmicutes     |
| 379 | GCA_000800335.1_ASM80033v1_genomic.fna  | Listeria       | Firmicutes     |
| 380 | GCA_001274875.1_ASM127487v1_genomic.fna | Spiroplasma    | Tenericutes    |
| 381 | GCA_000011145.1_ASM1114v1_genomic.fna   | Bacillus       | Firmicutes     |
| 382 | GCA_001506465.1_ASM150646v1_genomic.fna | Campylobacter  | Proteobacteria |
| 383 | GCA_002202295.1_ASM220229v1_genomic.fna | Streptococcus  | Firmicutes     |
| 384 | GCA_000808055.1_ASM80805v1_genomic.fna  | Listeria       | Firmicutes     |
| 385 | GCA_000769575.1_ASM76957v1_genomic.fna  | Staphylococcus | Firmicutes     |
| 386 | GCA_001506445.1_ASM150644v1_genomic.fna | Campylobacter  | Proteobacteria |
| 387 | GCA_000756205.1_ASM75620v1_genomic.fna  | Staphylococcus | Firmicutes     |
| 388 | GCA_002142595.1_ASM214259v1_genomic.fna | Bacillus       | Firmicutes     |
| 389 | GCA_002236855.1_ASM223685v1_genomic.fna | Streptococcus  | Firmicutes     |
| 390 | GCA_002236875.1_ASM223687v1_genomic.fna | Streptococcus  | Firmicutes     |
| 391 | GCA_002163815.1_ASM216381v1_genomic.fna | Bacillus       | Firmicutes     |
| 392 | GCA_000772025.1_ASM77202v1_genomic.fna  | Staphylococcus | Firmicutes     |
| 393 | GCA_001506485.1_ASM150648v1_genomic.fna | Campylobacter  | Proteobacteria |
| 394 | GCA_000815045.1_ASM81504v1_genomic.fna  | Staphylococcus | Firmicutes     |
| 395 | GCA_001506505.1_ASM150650v1_genomic.fna | Campylobacter  | Proteobacteria |
| 396 | GCA_000950775.1_ASM95077v1_genomic.fna  | Listeria       | Firmicutes     |
| 397 | GCA_001296125.1_ASM129612v1_genomic.fna | Fusobacterium  | Fusobacteria   |
| 398 | GCA_002238295.1_ASM223829v1_genomic.fna | Streptococcus  | Firmicutes     |
| 399 | GCA_001005925.1_ASM100592v1_genomic.fna | Listeria       | Firmicutes     |
| 400 | GCA_001870065.1_ASM187006v1_genomic.fna | Bacillus       | Firmicutes     |
| 401 | GCA_900187025.1_49923_F01_genomic.fna   | Listeria       | Firmicutes     |
| 402 | GCA_002162055.1_ASM216205v1_genomic.fna | Lactobacillus  | Firmicutes     |
| 403 | GCA_002173695.1_ASM217369v1_genomic.fna | Bacillus       | Firmicutes     |
| 404 | GCA_001611865.1_ASM161186v1_genomic.fna | Mycoplasma     | Tenericutes    |
| 405 | GCA_000954195.1_ASM95419v1_genomic.fna  | Campylobacter  | Proteobacteria |

406 GCA\_000286695.1\_ASM28669v1\_genomic.fna  
 407 GCA\_002117345.1\_ASM211734v1\_genomic.fna  
 408 GCA\_000412205.1\_ASM41220v1\_genomic.fna  
 409 GCA\_000816425.1\_ASM81642v1\_genomic.fna  
 410 GCA\_000331085.2\_ASM33108v2\_genomic.fna  
 411 GCA\_001280365.1\_ASM128036v1\_genomic.fna  
 412 GCA\_001886915.1\_ASM188691v1\_genomic.fna  
 413 GCA\_000298875.1\_ASM29887v1\_genomic.fna  
 414 GCA\_000418495.1\_ASM41849v1\_genomic.fna  
 415 GCA\_002706425.1\_ASM270642v1\_genomic.fna  
 416 GCA\_000833315.1\_ASM83331v1\_genomic.fna  
 417 GCA\_001932695.1\_ASM193269v1\_genomic.fna  
 418 GCA\_001050455.1\_ASM105045v1\_genomic.fna  
 419 GCA\_002386185.1\_ASM238618v1\_genomic.fna  
 420 GCA\_000317915.1\_ASM31791v1\_genomic.fna  
 421 GCA\_000193205.1\_ASM19320v1\_genomic.fna  
 422 GCA\_001298485.1\_ASM129848v1\_genomic.fna  
 423 GCA\_001558215.1\_ASM155821v1\_genomic.fna  
 424 GCA\_000767725.1\_ASM76772v1\_genomic.fna  
 425 GCA\_000262385.1\_ASM26238v1\_genomic.fna  
 426 GCA\_000143725.1\_ASM14372v1\_genomic.fna  
 427 GCA\_000262145.1\_ASM26214v1\_genomic.fna  
 428 GCA\_002151465.1\_ASM215146v1\_genomic.fna  
 429 GCA\_000376625.1\_ASM37662v1\_genomic.fna  
 430 GCA\_000017065.1\_ASM1706v1\_genomic.fna  
 431 GCA\_000277245.1\_ASM27724v1\_genomic.fna  
 432 GCA\_001577795.1\_ASM157779v1\_genomic.fna  
 433 GCA\_000318035.1\_ASM31803v1\_genomic.fna  
 434 GCA\_001578185.1\_ASM157818v1\_genomic.fna  
 435 GCA\_000463465.1\_ASM46346v1\_genomic.fna  
 436 GCA\_000168875.3\_ASM16887v3\_genomic.fna  
 437 GCA\_000203215.1\_ASM20321v1\_genomic.fna  
 438 GCA\_000027185.1\_ASM2718v1\_genomic.fna  
 439 GCA\_000800785.1\_ASM80078v1\_genomic.fna

|                |                |
|----------------|----------------|
| Mycoplasma     | Tenericutes    |
| Lactobacillus  | Firmicutes     |
| Lactobacillus  | Firmicutes     |
| Campylobacter  | Proteobacteria |
| Mycoplasma     | Tenericutes    |
| Serratia       | Proteobacteria |
| Leuconostoc    | Firmicutes     |
| Leuconostoc    | Firmicutes     |
| Lactobacillus  | Firmicutes     |
| Lactobacillus  | Firmicutes     |
| Francisella    | Proteobacteria |
| Weissella      | Firmicutes     |
| Bacillus       | Firmicutes     |
| Staphylococcus | Firmicutes     |
| Enterococcus   | Firmicutes     |
| Aerococcus     | Firmicutes     |
| Enterococcus   | Firmicutes     |
| Streptococcus  | Firmicutes     |
| Mycoplasma     | Tenericutes    |
| Bacillus       | Firmicutes     |
| Brachyspira    | Spirochaetes   |
| Streptococcus  | Firmicutes     |
| Borrelia       | Spirochaetes   |
| Mycoplasma     | Tenericutes    |
| Clostridium    | Firmicutes     |
| Rickettsia     | Proteobacteria |
| Clostridioides | Firmicutes     |
| Lactobacillus  | Firmicutes     |
| Bacillus       | Firmicutes     |
| Streptococcus  | Firmicutes     |
| Coxiella       | Proteobacteria |
| Mycoplasma     | Tenericutes    |
| Streptococcus  | Firmicutes     |
| Mycoplasma     | Tenericutes    |

|     |                                         |                 |                |
|-----|-----------------------------------------|-----------------|----------------|
| 440 | GCA_001941785.1_ASM194178v1_genomic.fna | Lactobacillus   | Firmicutes     |
| 441 | GCA_000237995.2_ASM23799v2_genomic.fna  | Pediococcus     | Firmicutes     |
| 442 | GCA_000194115.1_ASM19411v1_genomic.fna  | Lactobacillus   | Firmicutes     |
| 443 | GCA_000283935.1_ASM28393v1_genomic.fna  | Rickettsia      | Proteobacteria |
| 444 | GCA_000307165.1_ASM30716v1_genomic.fna  | Amphibacillus   | Firmicutes     |
| 445 | GCA_000270465.1_ASM27046v1_genomic.fna  | Staphylococcus  | Firmicutes     |
| 446 | GCA_000525715.1_ASM52571v1_genomic.fna  | Lactobacillus   | Firmicutes     |
| 447 | GCA_000463425.1_ASM46342v1_genomic.fna  | Streptococcus   | Firmicutes     |
| 448 | GCA_000227485.1_ASM22748v1_genomic.fna  | Bacillus        | Firmicutes     |
| 449 | GCA_001543085.1_ASM154308v1_genomic.fna | Streptococcus   | Firmicutes     |
| 450 | GCA_000815065.1_ASM81506v1_genomic.fna  | Mycoplasma      | Tenericutes    |
| 451 | GCA_000524555.1_ASM52455v1_genomic.fna  | Mycoplasma      | Tenericutes    |
| 452 | GCA_002005185.1_ASM200518v1_genomic.fna | Veillonella     | Firmicutes     |
| 453 | GCA_001029265.1_ASM102926v1_genomic.fna | Spiroplasma     | Tenericutes    |
| 454 | GCA_000759515.1_ASM75951v1_genomic.fna  | Campylobacter   | Proteobacteria |
| 455 | GCA_000953375.1_F38.1_genomic.fna       | Mycoplasma      | Tenericutes    |
| 456 | GCA_001888905.1_ASM188890v1_genomic.fna | Lactobacillus   | Firmicutes     |
| 457 | GCA_000014645.1_ASM1464v1_genomic.fna   | Francisella     | Proteobacteria |
| 458 | GCA_001431145.1_ASM143114v1_genomic.fna | Bacillus        | Firmicutes     |
| 459 | GCA_000439275.1_ASM43927v1_genomic.fna  | Lactobacillus   | Firmicutes     |
| 460 | GCA_900187035.1_50279_G02_genomic.fna   | Megamonas       | Firmicutes     |
| 461 | GCA_000565195.1_ASM56519v1_genomic.fna  | Spiroplasma     | Tenericutes    |
| 462 | GCA_001922325.1_ASM192232v1_genomic.fna | Pediococcus     | Firmicutes     |
| 463 | GCA_000328625.1_ASM32862v1_genomic.fna  | Halobacteroides | Firmicutes     |
| 464 | GCA_000193355.1_ASM19335v1_genomic.fna  | Bacillus        | Firmicutes     |
| 465 | GCA_002356175.1_ASM235617v1_genomic.fna | Staphylococcus  | Firmicutes     |
| 466 | GCA_000404205.1_ASM40420v1_genomic.fna  | Erysipelothrix  | Firmicutes     |
| 467 | GCA_000165925.1_ASM16592v1_genomic.fna  | Bacillus        | Firmicutes     |
| 468 | GCA_001983955.1_ASM198395v1_genomic.fna | Streptococcus   | Firmicutes     |
| 469 | GCA_000262675.1_ASM26267v1_genomic.fna  | Streptococcus   | Firmicutes     |
| 470 | GCA_002074095.1_ASM207409v1_genomic.fna | Bacillus        | Firmicutes     |
| 471 | GCA_000427035.1_09mas018883_genomic.fna | Streptococcus   | Firmicutes     |
| 472 | GCA_002238335.1_ASM223833v1_genomic.fna | Campylobacter   | Proteobacteria |
| 473 | GCA_000816185.1_ASM81618v1_genomic.fna  | Campylobacter   | Proteobacteria |

474 GCA\_001701005.1\_ASM170100v1\_genomic.fna  
 475 GCA\_002139935.1\_ASM213993v1\_genomic.fna  
 476 GCA\_001267395.1\_ASM126739v1\_genomic.fna  
 477 GCA\_002386265.1\_ASM238626v1\_genomic.fna  
 478 GCA\_000340885.1\_ASM34088v1\_genomic.fna  
 479 GCA\_000829035.1\_ASM82903v1\_genomic.fna  
 480 GCA\_000504125.1\_ASM50412v1\_genomic.fna  
 481 GCA\_000022105.1\_ASM2210v1\_genomic.fna  
 482 GCA\_000300135.1\_ASM30013v1\_genomic.fna  
 483 GCA\_000328545.1\_ASM32854v1\_genomic.fna  
 484 GCA\_000816345.1\_ASM81634v1\_genomic.fna  
 485 GCA\_000306805.1\_ASM30680v1\_genomic.fna  
 486 GCA\_002220735.1\_ASM222073v1\_genomic.fna  
 487 GCA\_001643955.1\_ASM164395v1\_genomic.fna  
 488 GCA\_002104335.1\_ASM210433v1\_genomic.fna  
 489 GCA\_002080395.1\_ASM208039v1\_genomic.fna  
 490 GCA\_000145705.1\_ASM14570v1\_genomic.fna  
 491 GCA\_000317975.2\_ASM31797v2\_genomic.fna  
 492 GCA\_000277795.1\_ASM27779v1\_genomic.fna  
 493 GCA\_001653955.1\_ASM165395v1\_genomic.fna  
 494 GCA\_000441535.1\_ASM44153v1\_genomic.fna  
 495 GCA\_002157855.1\_ASM215785v1\_genomic.fna  
 496 GCA\_000284155.1\_ASM28415v1\_genomic.fna  
 497 GCA\_000284195.1\_ASM28419v1\_genomic.fna  
 498 GCA\_000283995.1\_ASM28399v1\_genomic.fna  
 499 GCA\_001885235.1\_ASM188523v1\_genomic.fna  
 500 GCA\_000262205.1\_ASM26220v1\_genomic.fna  
 501 GCA\_000238995.1\_ASM23899v1\_genomic.fna  
 502 GCA\_000307585.2\_ASM30758v2\_genomic.fna  
 503 GCA\_000284075.1\_ASM28407v1\_genomic.fna  
 504 GCA\_000284175.1\_ASM28417v1\_genomic.fna  
 505 GCA\_000816085.1\_ASM81608v1\_genomic.fna  
 506 GCA\_000008885.1\_ASM888v1\_genomic.fna  
 507 GCA\_000011245.1\_ASM1124v1\_genomic.fna

|                    |                |
|--------------------|----------------|
| Staphylococcus     | Firmicutes     |
| Campylobacter      | Proteobacteria |
| Enterococcus       | Firmicutes     |
| Weissella          | Firmicutes     |
| Clostridium        | Firmicutes     |
| Lactobacillus      | Firmicutes     |
| Enterococcus       | Firmicutes     |
| Brachyspira        | Spirochaetes   |
| Leuconostoc        | Firmicutes     |
| Thermoanaerobacter | Firmicutes     |
| Campylobacter      | Proteobacteria |
| Streptococcus      | Firmicutes     |
| Campylobacter      | Proteobacteria |
| Mycoplasma         | Tenericutes    |
| Carnobacterium     | Firmicutes     |
| Mycoplasma         | Tenericutes    |
| Francisella        | Proteobacteria |
| Streptococcus      | Firmicutes     |
| Bacillus           | Firmicutes     |
| Rickettsia         | Proteobacteria |
| Rickettsia         | Proteobacteria |
| Rickettsia         | Proteobacteria |
| Francisella        | Proteobacteria |
| Francisella        | Proteobacteria |
| Mycoplasma         | Tenericutes    |
| Thermoanaerobacter | Firmicutes     |
| Rickettsia         | Proteobacteria |
| Rickettsia         | Proteobacteria |
| Staphylococcus     | Firmicutes     |
| Wigglesworthia     | Proteobacteria |
| Oceanobacillus     | Firmicutes     |

|     |                                         |                      |                |
|-----|-----------------------------------------|----------------------|----------------|
| 508 | GCA_000014445.1_ASM1444v1_genomic.fna   | Leuconostoc          | Firmicutes     |
| 509 | GCA_000009545.1_ASM954v1_genomic.fna    | Streptococcus        | Firmicutes     |
| 510 | GCA_000007625.1_ASM762v1_genomic.fna    | Clostridium          | Firmicutes     |
| 511 | GCA_000011985.1_ASM1198v1_genomic.fna   | Lactobacillus        | Firmicutes     |
| 512 | GCA_000055945.1_ASM5594v1_genomic.fna   | Lawsonia             | Proteobacteria |
| 513 | GCA_000203855.3_ASM20385v3_genomic.fna  | Lactobacillus        | Firmicutes     |
| 514 | GCA_000014505.1_ASM1450v1_genomic.fna   | Pediococcus          | Firmicutes     |
| 515 | GCA_000014465.1_ASM1446v1_genomic.fna   | Lactobacillus        | Firmicutes     |
| 516 | GCA_000513215.1_DB11_genomic.fna        | Serratia             | Proteobacteria |
| 517 | GCA_000092585.1_ASM9258v1_genomic.fna   | Mycoplasma           | Tenericutes    |
| 518 | GCA_000020065.1_ASM2006v1_genomic.fna   | Mycoplasma           | Tenericutes    |
| 519 | GCA_000008305.1_ASM830v1_genomic.fna    | Mesoplasma           | Tenericutes    |
| 520 | GCA_000013185.1_ASM1318v1_genomic.fna   | Baumannia            | Proteobacteria |
| 521 | GCA_002173715.1_ASM217371v1_genomic.fna | Bacillus             | Firmicutes     |
| 522 | GCA_000009865.1_ASM986v1_genomic.fna    | Staphylococcus       | Firmicutes     |
| 523 | GCA_002024185.1_ASM202418v1_genomic.fna | Campylobacter        | Proteobacteria |
| 524 | GCA_000183385.1_ASM18338v1_genomic.fna  | Mycoplasma           | Tenericutes    |
| 525 | GCA_000019205.1_ASM1920v1_genomic.fna   | Campylobacter        | Proteobacteria |
| 526 | GCA_000021545.1_ASM2154v1_genomic.fna   | Sulfurihydrogenibium | Aquificae      |
| 527 | GCA_000815085.1_ASM81508v1_genomic.fna  | Staphylococcus       | Firmicutes     |
| 528 | GCA_001005985.1_ASM100598v1_genomic.fna | Listeria             | Firmicutes     |
| 529 | GCA_000833105.2_ASM83310v2_genomic.fna  | Clostridium          | Firmicutes     |
| 530 | GCA_000014345.1_ASM1434v1_genomic.fna   | Rickettsia           | Proteobacteria |
| 531 | GCA_000018205.1_ASM1820v1_genomic.fna   | Rickettsia           | Proteobacteria |
| 532 | GCA_001296185.1_ASM129618v1_genomic.fna | Fusobacterium        | Fusobacteria   |
| 533 | GCA_002238315.1_ASM223831v1_genomic.fna | Streptococcus        | Firmicutes     |
| 534 | GCA_001027065.1_ASM102706v1_genomic.fna | Listeria             | Firmicutes     |
| 535 | GCA_002355175.1_ASM235517v1_genomic.fna | Streptococcus        | Firmicutes     |
| 536 | GCA_001506525.1_ASM150652v1_genomic.fna | Campylobacter        | Proteobacteria |
| 537 | GCA_001506545.1_ASM150654v1_genomic.fna | Campylobacter        | Proteobacteria |
| 538 | GCA_000815125.1_ASM81512v1_genomic.fna  | Staphylococcus       | Firmicutes     |
| 539 | GCA_002201955.1_ASM220195v1_genomic.fna | Bacillus             | Firmicutes     |
| 540 | GCA_000008925.1_ASM892v1_genomic.fna    | Lactobacillus        | Firmicutes     |
| 541 | GCA_000009825.1_ASM982v1_genomic.fna    | Bacillus             | Firmicutes     |



|     |                                         |                |                |
|-----|-----------------------------------------|----------------|----------------|
| 542 | GCA_002211645.1_ASM221164v1_genomic.fna | Fusobacterium  | Fusobacteria   |
| 543 | GCA_002201995.1_ASM220199v1_genomic.fna | Bacillus       | Firmicutes     |
| 544 | GCA_002355815.1_ASM235581v1_genomic.fna | Streptococcus  | Firmicutes     |
| 545 | GCA_001027085.1_ASM102708v1_genomic.fna | Listeria       | Firmicutes     |
| 546 | GCA_001506565.1_ASM150656v1_genomic.fna | Campylobacter  | Proteobacteria |
| 547 | GCA_000815165.1_ASM81516v1_genomic.fna  | Staphylococcus | Firmicutes     |
| 548 | GCA_000815205.1_ASM81520v1_genomic.fna  | Staphylococcus | Firmicutes     |
| 549 | GCA_001506585.1_ASM150658v1_genomic.fna | Campylobacter  | Proteobacteria |
| 550 | GCA_002557755.1_ASM255775v1_genomic.fna | Streptococcus  | Firmicutes     |
| 551 | GCA_001027125.1_ASM102712v1_genomic.fna | Listeria       | Firmicutes     |
| 552 | GCA_002202055.1_ASM220205v1_genomic.fna | Bacillus       | Firmicutes     |
| 553 | GCA_002202035.1_ASM220203v1_genomic.fna | Bacillus       | Firmicutes     |
| 554 | GCA_001027165.1_ASM102716v1_genomic.fna | Listeria       | Firmicutes     |
| 555 | GCA_001506605.1_ASM150660v1_genomic.fna | Campylobacter  | Proteobacteria |
| 556 | GCA_000815245.1_ASM81524v1_genomic.fna  | Staphylococcus | Firmicutes     |
| 557 | GCA_001506625.1_ASM150662v1_genomic.fna | Campylobacter  | Proteobacteria |
| 558 | GCA_001027205.1_ASM102720v1_genomic.fna | Listeria       | Firmicutes     |
| 559 | GCA_000828035.1_ASM82803v1_genomic.fna  | Staphylococcus | Firmicutes     |
| 560 | GCA_000956315.1_ASM95631v1_genomic.fna  | Borrelia       | Spirochaetes   |
| 561 | GCA_002197485.1_ASM219748v1_genomic.fna | Anoxybacillus  | Firmicutes     |
| 562 | GCA_000211375.1_ASM21137v1_genomic.fna  | Lactobacillus  | Firmicutes     |
| 563 | GCA_000008245.1_ASM824v1_genomic.fna    | Mycoplasma     | Tenericutes    |
| 564 | GCA_000026065.1_ASM2606v1_genomic.fna   | Lactobacillus  | Firmicutes     |
| 565 | GCA_000200735.1_ASM20073v1_genomic.fna  | Mycoplasma     | Tenericutes    |
| 566 | GCA_000215345.3_ASM21534v3_genomic.fna  | Arcobacter     | Proteobacteria |
| 567 | GCA_002119825.1_ASM211982v1_genomic.fna | Macrococcus    | Firmicutes     |
| 568 | GCA_000091405.1_ASM9140v1_genomic.fna   | Lactobacillus  | Firmicutes     |
| 569 | GCA_000277285.1_ASM27728v1_genomic.fna  | Rickettsia     | Proteobacteria |
| 570 | GCA_001581875.1_ASM158187v1_genomic.fna | Lysinibacillus | Firmicutes     |
| 571 | GCA_001465175.1_ASM146517v1_genomic.fna | Clostridium    | Firmicutes     |
| 572 | GCA_001885145.1_ASM188514v1_genomic.fna | Streptococcus  | Firmicutes     |
| 573 | GCA_000017725.2_ASM1772v2_genomic.fna   | Campylobacter  | Proteobacteria |
| 574 | GCA_001553195.1_ASM155319v1_genomic.fna | Mycoplasma     | Tenericutes    |
| 575 | GCA_001941385.1_ASM194138v1_genomic.fna | Thermosiphonia | Thermotogae    |

|     |                                         |                |                |
|-----|-----------------------------------------|----------------|----------------|
| 576 | GCA_000299355.1_ASM29935v1_genomic.fna  | Gottschalkia   | Firmicutes     |
| 577 | GCA_000248095.3_ASM24809v3_genomic.fna  | Lactobacillus  | Firmicutes     |
| 578 | GCA_000169195.2_ASM16919v2_genomic.fna  | Bacillus       | Firmicutes     |
| 579 | GCA_000565155.1_ASM56515v1_genomic.fna  | Listeria       | Firmicutes     |
| 580 | GCA_900187315.1_52087_C01_genomic.fna   | Listeria       | Firmicutes     |
| 581 | GCA_000283635.1_ASM28363v1_genomic.fna  | Streptococcus  | Firmicutes     |
| 582 | GCA_000148625.1_ASM14862v1_genomic.fna  | Mycoplasma     | Tenericutes    |
| 583 | GCA_000016965.1_ASM1696v1_genomic.fna   | Clostridium    | Firmicutes     |
| 584 | GCA_000283915.1_ASM28391v1_genomic.fna  | Rickettsia     | Proteobacteria |
| 585 | GCA_000143435.1_ASM14343v1_genomic.fna  | Lactobacillus  | Firmicutes     |
| 586 | GCA_000737305.2_ASM73730v2_genomic.fna  | Bacillus       | Firmicutes     |
| 587 | GCA_000479355.1_ASM47935v1_genomic.fna  | Mesoplasma     | Tenericutes    |
| 588 | GCA_001190755.1_ASM119075v1_genomic.fna | Campylobacter  | Proteobacteria |
| 589 | GCA_001611955.1_ASM161195v1_genomic.fna | Staphylococcus | Firmicutes     |
| 590 | GCA_000465235.1_ASM46523v1_genomic.fna  | Campylobacter  | Proteobacteria |
| 591 | GCA_001586195.1_ASM158619v1_genomic.fna | Solibacillus   | Firmicutes     |
| 592 | GCA_000816225.1_ASM81622v1_genomic.fna  | Campylobacter  | Proteobacteria |
| 593 | GCA_000219375.1_ASM21937v1_genomic.fna  | Mycoplasma     | Tenericutes    |
| 594 | GCA_000389675.2_ASM38967v2_genomic.fna  | Lactobacillus  | Firmicutes     |
| 595 | GCA_000331715.1_ASM33171v1_genomic.fna  | Lawsonia       | Proteobacteria |
| 596 | GCA_000176835.2_ASM17683v2_genomic.fna  | Serratia       | Proteobacteria |
| 597 | GCA_000359625.1_ASM35962v1_genomic.fna  | Lactobacillus  | Firmicutes     |
| 598 | GCA_000496265.1_ASM49626v1_genomic.fna  | Pediococcus    | Firmicutes     |
| 599 | GCA_000330865.1_ASM33086v1_genomic.fna  | Serratia       | Proteobacteria |
| 600 | GCA_000025365.1_ASM2536v1_genomic.fna   | Mycoplasma     | Tenericutes    |
| 601 | GCA_001432245.1_ASM143224v1_genomic.fna | Staphylococcus | Firmicutes     |
| 602 | GCA_000967115.1_CT1_genomic.fna         | Clostridium    | Firmicutes     |
| 603 | GCA_000981525.1_L_piscium_genomic.fna   | Lactococcus    | Firmicutes     |
| 604 | GCA_001895885.1_ASM189588v1_genomic.fna | Bacillus       | Firmicutes     |
| 605 | GCA_002443015.1_ASM244301v1_genomic.fna | Bacillus       | Firmicutes     |
| 606 | GCA_001547975.1_ASM154797v1_genomic.fna | Mycoplasma     | Tenericutes    |
| 607 | GCA_001687565.2_ASM168756v2_genomic.fna | Planococcus    | Firmicutes     |
| 608 | GCA_001886855.1_ASM188685v1_genomic.fna | Spiroplasma    | Tenericutes    |
| 609 | GCA_000186005.1_ASM18600v1_genomic.fna  | Mycoplasma     | Tenericutes    |

|     |                                                               |                |                |
|-----|---------------------------------------------------------------|----------------|----------------|
| 610 | GCA_000252975.1_ASM25297v1_genomic.fna                        | Listeria       | Firmicutes     |
| 611 | GCA_000027145.1_ASM2714v1_genomic.fna                         | Listeria       | Firmicutes     |
| 612 | GCA_000060285.1_ASM6028v1_genomic.fna                         | Listeria       | Firmicutes     |
| 613 | GCA_000143685.1_ASM14368v1_genomic.fna                        | Clostridium    | Firmicutes     |
| 614 | GCA_000775975.1_ASM77597v1_genomic.fna                        | Bacillus       | Firmicutes     |
| 615 | GCA_000012145.1_ASM1214v1_genomic.fna                         | Rickettsia     | Proteobacteria |
| 616 | GCA_000014205.1_ASM1420v1_genomic.fna                         | Streptococcus  | Firmicutes     |
| 617 | GCA_000010125.1_ASM1012v1_genomic.fna                         | Staphylococcus | Firmicutes     |
| 618 | GCA_000832905.1_ASM83290v1_genomic.fna                        | Bacillus       | Firmicutes     |
| 619 | GCA_000026405.1_ASM2640v1_genomic.fna                         | Leuconostoc    | Firmicutes     |
| 620 | GCA_002269175.1_ASM226917v1_genomic.fna                       | Bacillus       | Firmicutes     |
| 621 | GCA_002216085.1_ASM221608v1_genomic.fna                       | Bacillus       | Firmicutes     |
| 622 | GCA_000953255.1_Staphylococcus_aureus_Sa_ILRI_217_genomic.fna | Staphylococcus | Firmicutes     |
| 623 | GCA_001027245.1_ASM102724v1_genomic.fna                       | Listeria       | Firmicutes     |
| 624 | GCA_001506645.1_ASM150664v1_genomic.fna                       | Campylobacter  | Proteobacteria |
| 625 | GCA_000014125.1_ASM1412v1_genomic.fna                         | Clostridium    | Firmicutes     |
| 626 | GCA_000831485.1_ASM83148v1_genomic.fna                        | Streptococcus  | Firmicutes     |
| 627 | GCA_001298465.1_ASM129846v1_genomic.fna                       | Campylobacter  | Proteobacteria |
| 628 | GCA_000017465.2_ASM1746v2_genomic.fna                         | Campylobacter  | Proteobacteria |
| 629 | GCA_000016905.1_ASM1690v1_genomic.fna                         | Thermosiphon   | Thermotogae    |
| 630 | GCA_001506665.1_ASM150666v1_genomic.fna                       | Campylobacter  | Proteobacteria |
| 631 | GCA_001047715.1_ASM104771v1_genomic.fna                       | Listeria       | Firmicutes     |
| 632 | GCA_000967325.1_ASM96732v1_genomic.fna                        | Staphylococcus | Firmicutes     |
| 633 | GCA_000817935.1_ASM81793v1_genomic.fna                        | Clostridium    | Firmicutes     |
| 634 | GCA_001554095.1_ASM155409v1_genomic.fna                       | Mycoplasma     | Tenericutes    |
| 635 | GCA_000706705.1_ASM70670v1_genomic.fna                        | Bacillus       | Firmicutes     |
| 636 | GCA_002290305.1_ASM229030v1_genomic.fna                       | Bacillus       | Firmicutes     |
| 637 | GCA_001895905.1_ASM189590v1_genomic.fna                       | Enterococcus   | Firmicutes     |
| 638 | GCA_001596755.1_ASM159675v1_genomic.fna                       | Bacillus       | Firmicutes     |
| 639 | GCA_002355755.1_ASM235575v1_genomic.fna                       | Enterococcus   | Firmicutes     |
| 640 | GCA_002269195.1_ASM226919v1_genomic.fna                       | Bacillus       | Firmicutes     |
| 641 | GCA_000803665.1_ASM80366v1_genomic.fna                        | Bacillus       | Firmicutes     |
| 642 | GCA_000967345.1_ASM96734v1_genomic.fna                        | Staphylococcus | Firmicutes     |
| 643 | GCA_001188655.1_ASM118865v1_genomic.fna                       | Listeria       | Firmicutes     |

644 GCA\_002285775.1\_ASM228577v1\_genomic.fna  
 645 GCA\_000313385.1\_ASM31338v1\_genomic.fna  
 646 GCA\_000967365.1\_ASM96736v1\_genomic.fna  
 647 GCA\_001190805.1\_ASM119080v1\_genomic.fna  
 648 GCA\_001506705.1\_ASM150670v1\_genomic.fna  
 649 GCA\_000471985.1\_ASM47198v1\_genomic.fna  
 650 GCA\_001454845.1\_ASM145484v1\_genomic.fna  
 651 GCA\_000832505.1\_ASM83250v1\_genomic.fna  
 652 GCA\_000210935.1\_ASM21093v1\_genomic.fna  
 653 GCA\_000250925.1\_ASM25092v1\_genomic.fna  
 654 GCA\_002012365.1\_ASM201236v1\_genomic.fna  
 655 GCA\_001506685.1\_ASM150668v1\_genomic.fna  
 656 GCA\_002556525.1\_ASM255652v1\_genomic.fna  
 657 GCA\_000218305.1\_ASM21830v1\_genomic.fna  
 658 GCA\_002078395.1\_ASM207839v1\_genomic.fna  
 659 GCA\_000832385.1\_ASM83238v1\_genomic.fna  
 660 GCA\_000021065.1\_ASM2106v1\_genomic.fna  
 661 GCA\_000024585.1\_ASM2458v1\_genomic.fna  
 662 GCA\_000025145.2\_ASM2514v1\_genomic.fna  
 663 GCA\_000468915.2\_ASM46891v2\_genomic.fna  
 664 GCA\_000832405.1\_ASM83240v1\_genomic.fna  
 665 GCA\_002078415.1\_ASM207841v1\_genomic.fna  
 666 GCA\_000258905.1\_ASM25890v1\_genomic.fna  
 667 GCA\_001454865.1\_ASM145486v1\_genomic.fna  
 668 GCA\_000466105.2\_ASM46610v2\_genomic.fna  
 669 GCA\_000967405.1\_ASM96740v1\_genomic.fna  
 670 GCA\_000021085.1\_ASM2108v1\_genomic.fna  
 671 GCA\_001454885.1\_ASM145488v1\_genomic.fna  
 672 GCA\_000307535.1\_ASM30753v1\_genomic.fna  
 673 GCA\_000210955.1\_ASM21095v1\_genomic.fna  
 674 GCA\_001506725.1\_ASM150672v1\_genomic.fna  
 675 GCA\_000967385.1\_ASM96738v1\_genomic.fna  
 676 GCA\_001506745.1\_ASM150674v1\_genomic.fna  
 677 GCA\_002286255.1\_ASM228625v1\_genomic.fna

|                |                |
|----------------|----------------|
| Lactobacillus  | Firmicutes     |
| Francisella    | Proteobacteria |
| Staphylococcus | Firmicutes     |
| Streptococcus  | Firmicutes     |
| Campylobacter  | Proteobacteria |
| Streptococcus  | Firmicutes     |
| Listeria       | Firmicutes     |
| Bacillus       | Firmicutes     |
| Streptococcus  | Firmicutes     |
| Streptococcus  | Firmicutes     |
| Streptococcus  | Firmicutes     |
| Campylobacter  | Proteobacteria |
| Bacillus       | Firmicutes     |
| Listeria       | Firmicutes     |
| Lactococcus    | Firmicutes     |
| Bacillus       | Firmicutes     |
| Buchnera       | Proteobacteria |
| Staphylococcus | Firmicutes     |
| Staphylococcus | Firmicutes     |
| Campylobacter  | Proteobacteria |
| Bacillus       | Firmicutes     |
| Lactococcus    | Firmicutes     |
| Listeria       | Firmicutes     |
| Listeria       | Firmicutes     |
| Campylobacter  | Proteobacteria |
| Staphylococcus | Firmicutes     |
| Buchnera       | Proteobacteria |
| Listeria       | Firmicutes     |
| Streptococcus  | Firmicutes     |
| Streptococcus  | Firmicutes     |
| Campylobacter  | Proteobacteria |
| Staphylococcus | Firmicutes     |
| Campylobacter  | Proteobacteria |
| Streptococcus  | Firmicutes     |

|     |                                                                |                |                |
|-----|----------------------------------------------------------------|----------------|----------------|
| 678 | GCA_000832565.1_ASM83256v1_genomic.fna                         | Bacillus       | Firmicutes     |
| 679 | GCA_001190885.1_ASM119088v1_genomic.fna                        | Streptococcus  | Firmicutes     |
| 680 | GCA_000494895.1_ASM49489v1_genomic.fna                         | Streptococcus  | Firmicutes     |
| 681 | GCA_000524575.1_ASM52457v1_genomic.fna                         | Francisella    | Proteobacteria |
| 682 | GCA_900196735.1_Lactobacillus_bulgaricus_ACA-DC_87_genomic.fna | Lactobacillus  | Firmicutes     |
| 683 | GCA_000737405.1_ASM73740v1_genomic.fna                         | Bacillus       | Firmicutes     |
| 684 | GCA_000832485.1_ASM83248v1_genomic.fna                         | Bacillus       | Firmicutes     |
| 685 | GCA_000234825.3_ASM23482v3_genomic.fna                         | Leuconostoc    | Firmicutes     |
| 686 | GCA_000023085.1_ASM2308v1_genomic.fna                          | Lactobacillus  | Firmicutes     |
| 687 | GCA_000143945.1_ASM14394v1_genomic.fna                         | Mycoplasma     | Tenericutes    |
| 688 | GCA_000247565.1_ASM24756v1_genomic.fna                         | Wigglesworthia | Proteobacteria |
| 689 | GCA_001953235.1_ASM195323v1_genomic.fna                        | Enterococcus   | Firmicutes     |
| 690 | GCA_001554115.1_ASM155411v1_genomic.fna                        | Mycoplasma     | Tenericutes    |
| 691 | GCA_000827935.1_ASM82793v1_genomic.fna                         | Clostridium    | Firmicutes     |
| 692 | GCA_001705195.1_ASM170519v1_genomic.fna                        | Bacillus       | Firmicutes     |
| 693 | GCA_002158885.1_ASM215888v1_genomic.fna                        | Lactobacillus  | Firmicutes     |
| 694 | GCA_000191905.1_ASM19190v1_genomic.fna                         | Clostridium    | Firmicutes     |
| 695 | GCA_000970665.2_ASM97066v2_genomic.fna                         | Streptococcus  | Firmicutes     |
| 696 | GCA_000832985.1_ASM83298v1_genomic.fna                         | Bacillus       | Firmicutes     |
| 697 | GCA_001477615.1_ASM147761v1_genomic.fna                        | Streptococcus  | Firmicutes     |
| 698 | GCA_001020205.1_ASM102020v1_genomic.fna                        | Clostridium    | Firmicutes     |
| 699 | GCA_000833195.1_ASM83319v1_genomic.fna                         | Francisella    | Proteobacteria |
| 700 | GCA_002393265.1_ASM239326v1_genomic.fna                        | Enterococcus   | Firmicutes     |
| 701 | GCA_000294775.2_ASM29477v2_genomic.fna                         | Bacillus       | Firmicutes     |
| 702 | GCA_000972245.3_ASM97224v3_genomic.fna                         | Bacillus       | Firmicutes     |
| 703 | GCA_001880205.1_ASM188020v1_genomic.fna                        | Francisella    | Proteobacteria |
| 704 | GCA_001878675.1_ASM187867v1_genomic.fna                        | Virgibacillus  | Firmicutes     |
| 705 | GCA_000011045.1_ASM1104v1_genomic.fna                          | Lactobacillus  | Firmicutes     |
| 706 | GCA_000020765.1_ASM2076v1_genomic.fna                          | Streptococcus  | Firmicutes     |
| 707 | GCA_000091645.1_ASM9164v1_genomic.fna                          | Streptococcus  | Firmicutes     |
| 708 | GCA_000250945.1_ASM25094v1_genomic.fna                         | Enterococcus   | Firmicutes     |
| 709 | GCA_001642655.1_ASM164265v1_genomic.fna                        | Clostridium    | Firmicutes     |
| 710 | GCA_000018825.1_ASM1882v1_genomic.fna                          | Bacillus       | Firmicutes     |
| 711 | GCA_000195515.1_ASM19551v1_genomic.fna                         | Bacillus       | Firmicutes     |

|     |                                         |                |                |
|-----|-----------------------------------------|----------------|----------------|
| 712 | GCA_001687585.2_ASM168758v2_genomic.fna | Planococcus    | Firmicutes     |
| 713 | GCA_000010705.1_ASM1070v1_genomic.fna   | Streptococcus  | Firmicutes     |
| 714 | GCA_000239475.1_ASM23947v1_genomic.fna  | Borrelia       | Spirochaetes   |
| 715 | GCA_001572725.1_ASM157272v1_genomic.fna | Serratia       | Proteobacteria |
| 716 | GCA_000021405.1_ASM2140v1_genomic.fna   | Borrelia       | Spirochaetes   |
| 717 | GCA_000022785.1_ASM2278v1_genomic.fna   | Rickettsia     | Proteobacteria |
| 718 | GCA_000210515.1_ASM21051v1_genomic.fna  | Lactobacillus  | Firmicutes     |
| 719 | GCA_000010265.1_ASM1026v1_genomic.fna   | Clostridium    | Firmicutes     |
| 720 | GCA_002202015.1_ASM220201v1_genomic.fna | Bacillus       | Firmicutes     |
| 721 | GCA_000023165.1_ASM2316v1_genomic.fna   | Mycoplasma     | Tenericutes    |
| 722 | GCA_002109385.1_ASM210938v1_genomic.fna | Bacillus       | Firmicutes     |
| 723 | GCA_000020165.1_ASM2016v1_genomic.fna   | Clostridium    | Firmicutes     |
| 724 | GCA_002208805.1_ASM220880v1_genomic.fna | Staphylococcus | Firmicutes     |
| 725 | GCA_000222835.1_ASM22283v1_genomic.fna  | Borrelia       | Spirochaetes   |
| 726 | GCA_000269945.1_ASM26994v1_genomic.fna  | Lactococcus    | Firmicutes     |
| 727 | GCA_000422085.1_ASM42208v1_genomic.fna  | Serratia       | Proteobacteria |
| 728 | GCA_000499665.2_RMONA_1_genomic.fna     | Rickettsia     | Proteobacteria |
| 729 | GCA_000328725.1_ASM32872v1_genomic.fna  | Mycoplasma     | Tenericutes    |
| 730 | GCA_002310475.1_ASM231047v1_genomic.fna | Lactococcus    | Firmicutes     |
| 731 | GCA_002356415.1_ASM235641v1_genomic.fna | Streptococcus  | Firmicutes     |
| 732 | GCA_000439435.1_ASM43943v1_genomic.fna  | Spiroplasma    | Tenericutes    |
| 733 | GCA_000750535.1_ASM75053v1_genomic.fna  | Weissella      | Firmicutes     |
| 734 | GCA_001951175.1_ASM195117v1_genomic.fna | Lactobacillus  | Firmicutes     |
| 735 | GCA_000018085.1_ASM1808v1_genomic.fna   | Serratia       | Proteobacteria |
| 736 | GCA_000019685.1_ASM1968v1_genomic.fna   | Borrelia       | Spirochaetes   |
| 737 | GCA_000019705.1_ASM1970v1_genomic.fna   | Borrelia       | Spirochaetes   |
| 738 | GCA_000023005.1_ASM2300v1_genomic.fna   | Rickettsia     | Proteobacteria |
| 739 | GCA_000016625.1_ASM1662v1_genomic.fna   | Rickettsia     | Proteobacteria |
| 740 | GCA_000010185.1_ASM1018v1_genomic.fna   | Finnegoldia    | Firmicutes     |
| 741 | GCA_000255135.1_ASM25513v1_genomic.fna  | Marinitoga     | Thermotogae    |
| 742 | GCA_001753205.1_ASM175320v1_genomic.fna | Lysinibacillus | Firmicutes     |
| 743 | GCA_000739475.1_ASM73947v1_genomic.fna  | Borrelia       | Spirochaetes   |
| 744 | GCA_001456065.2_ASM145606v2_genomic.fna | Clostridium    | Firmicutes     |
| 745 | GCA_000017585.1_ASM1758v1_genomic.fna   | Campylobacter  | Proteobacteria |

|     |                                         |                |                |
|-----|-----------------------------------------|----------------|----------------|
| 746 | GCA_000010585.1_ASM1058v1_genomic.fna   | Macrococcus    | Firmicutes     |
| 747 | GCA_000008065.1_ASM806v1_genomic.fna    | Lactobacillus  | Firmicutes     |
| 748 | GCA_000969765.1_ASM96976v1_genomic.fna  | Mycoplasma     | Tenericutes    |
| 749 | GCA_000008045.1_ASM804v1_genomic.fna    | Rickettsia     | Proteobacteria |
| 750 | GCA_000008365.1_ASM836v1_genomic.fna    | Mycoplasma     | Tenericutes    |
| 751 | GCA_000186985.3_ASM18698v3_genomic.fna  | Mycoplasma     | Tenericutes    |
| 752 | GCA_000732385.1_ASM73238v1_genomic.fna  | Streptococcus  | Firmicutes     |
| 753 | GCA_002224565.1_ASM222456v1_genomic.fna | Lactobacillus  | Firmicutes     |
| 754 | GCA_001535505.1_ASM153550v1_genomic.fna | Streptococcus  | Firmicutes     |
| 755 | GCA_001547815.1_ASM154781v1_genomic.fna | Streptococcus  | Firmicutes     |
| 756 | GCA_001506765.1_ASM150676v1_genomic.fna | Campylobacter  | Proteobacteria |
| 757 | GCA_001506785.1_ASM150678v1_genomic.fna | Campylobacter  | Proteobacteria |
| 758 | GCA_000012085.2_ASM1208v2_genomic.fna   | Borrelia       | Spirochaetes   |
| 759 | GCA_000014025.1_ASM1402v1_genomic.fna   | Arcobacter     | Proteobacteria |
| 760 | GCA_001454905.1_ASM145490v1_genomic.fna | Listeria       | Firmicutes     |
| 761 | GCA_000969225.1_ASM96922v1_genomic.fna  | Staphylococcus | Firmicutes     |
| 762 | GCA_001272875.1_ASM127287v1_genomic.fna | Mycoplasma     | Tenericutes    |
| 763 | GCA_000183365.1_ASM18336v1_genomic.fna  | Mycoplasma     | Tenericutes    |
| 764 | GCA_000021285.1_ASM2128v1_genomic.fna   | Thermosipho    | Thermotogae    |
| 765 | GCA_001454925.1_ASM145492v1_genomic.fna | Listeria       | Firmicutes     |
| 766 | GCA_001021875.1_ASM102187v1_genomic.fna | Staphylococcus | Firmicutes     |
| 767 | GCA_002072755.1_ASM207275v1_genomic.fna | Staphylococcus | Firmicutes     |
| 768 | GCA_001593395.2_ASM159339v2_genomic.fna | Bacillus       | Firmicutes     |
| 769 | GCA_001685645.1_ASM168564v1_genomic.fna | Bacillus       | Firmicutes     |
| 770 | GCA_001659745.1_ASM165974v1_genomic.fna | Lactobacillus  | Firmicutes     |
| 771 | GCA_002220655.1_ASM222065v1_genomic.fna | Serratia       | Proteobacteria |
| 772 | GCA_001936355.1_ASM193635v1_genomic.fna | Campylobacter  | Proteobacteria |
| 773 | GCA_001506825.1_ASM150682v1_genomic.fna | Campylobacter  | Proteobacteria |
| 774 | GCA_001660025.1_ASM166002v1_genomic.fna | Lactobacillus  | Firmicutes     |
| 775 | GCA_001027045.1_ASM102704v1_genomic.fna | Staphylococcus | Firmicutes     |
| 776 | GCA_001675515.1_ASM167551v1_genomic.fna | Bacillus       | Firmicutes     |
| 777 | GCA_000774075.2_ASM77407v2_genomic.fna  | Bacillus       | Firmicutes     |
| 778 | GCA_001272895.1_ASM127289v1_genomic.fna | Mycoplasma     | Tenericutes    |
| 779 | GCA_001483425.1_ASM148342v1_genomic.fna | Listeria       | Firmicutes     |

780 GCA\_001021895.1\_ASM102189v1\_genomic.fna  
 781 GCA\_001483405.1\_ASM148340v1\_genomic.fna  
 782 GCA\_001506805.1\_ASM150680v1\_genomic.fna  
 783 GCA\_002407145.1\_ASM240714v1\_genomic.fna  
 784 GCA\_002220675.1\_ASM222067v1\_genomic.fna  
 785 GCA\_000827955.1\_ASM82795v1\_genomic.fna  
 786 GCA\_900094185.1\_Ef\_DMG1500501\_genomic.fna  
 787 GCA\_001594345.1\_ASM159434v1\_genomic.fna  
 788 GCA\_000772125.1\_ASM77212v1\_genomic.fna  
 789 GCA\_000583775.1\_ASM58377v1\_genomic.fna  
 790 GCA\_000833165.1\_ASM83316v1\_genomic.fna  
 791 GCA\_001953255.1\_ASM195325v1\_genomic.fna  
 792 GCA\_001874385.1\_ASM187438v1\_genomic.fna  
 793 GCA\_001483445.1\_ASM148344v1\_genomic.fna  
 794 GCA\_002443035.1\_ASM244303v1\_genomic.fna  
 795 GCA\_001506845.1\_ASM150684v1\_genomic.fna  
 796 GCA\_001027105.1\_ASM102710v1\_genomic.fna  
 797 GCA\_001266635.1\_ASM126663v1\_genomic.fna  
 798 GCA\_001506865.1\_ASM150686v1\_genomic.fna  
 799 GCA\_001305715.1\_ASM130571v1\_genomic.fna  
 800 GCA\_000832825.1\_ASM83282v1\_genomic.fna  
 801 GCA\_000210975.1\_ASM21097v1\_genomic.fna  
 802 GCA\_000349925.2\_ASM34992v2\_genomic.fna  
 803 GCA\_000183225.1\_ASM18322v1\_genomic.fna  
 804 GCA\_001513695.1\_ASM151369v1\_genomic.fna  
 805 GCA\_000832585.1\_ASM83258v1\_genomic.fna  
 806 GCA\_001045795.2\_ASM104579v2\_genomic.fna  
 807 GCA\_000732355.1\_ASM73235v1\_genomic.fna  
 808 GCA\_000832525.1\_ASM83252v1\_genomic.fna  
 809 GCA\_000493495.1\_TS\_genomic.fna  
 810 GCA\_000027045.1\_ASM2704v1\_genomic.fna  
 811 GCA\_000144955.1\_ASM14495v1\_genomic.fna  
 812 GCA\_000632435.1\_ASM63243v1\_genomic.fna  
 813 GCA\_000306905.1\_ASM30690v1\_genomic.fna

|                |                |
|----------------|----------------|
| Staphylococcus | Firmicutes     |
| Listeria       | Firmicutes     |
| Campylobacter  | Proteobacteria |
| Campylobacter  | Proteobacteria |
| Serratia       | Proteobacteria |
| Clostridium    | Firmicutes     |
| Enterococcus   | Firmicutes     |
| Enterococcus   | Firmicutes     |
| Bacillus       | Firmicutes     |
| Campylobacter  | Proteobacteria |
| Francisella    | Proteobacteria |
| Enterococcus   | Firmicutes     |
| Bacillus       | Firmicutes     |
| Listeria       | Firmicutes     |
| Streptococcus  | Firmicutes     |
| Campylobacter  | Proteobacteria |
| Staphylococcus | Firmicutes     |
| Streptococcus  | Firmicutes     |
| Campylobacter  | Proteobacteria |
| Campylobacter  | Proteobacteria |
| Bacillus       | Firmicutes     |
| Streptococcus  | Firmicutes     |
| Streptococcus  | Firmicutes     |
| Buchnera       | Proteobacteria |
| Listeria       | Firmicutes     |
| Bacillus       | Firmicutes     |
| Staphylococcus | Firmicutes     |
| Streptococcus  | Firmicutes     |
| Bacillus       | Firmicutes     |
| Campylobacter  | Proteobacteria |
| Staphylococcus | Firmicutes     |
| Staphylococcus | Firmicutes     |
| Campylobacter  | Proteobacteria |
| Listeria       | Firmicutes     |



|     |                                           |                |                |
|-----|-------------------------------------------|----------------|----------------|
| 814 | GCA_002078435.1_ASM207843v1_genomic.fna   | Lactococcus    | Firmicutes     |
| 815 | GCA_000306985.1_ASM30698v1_genomic.fna    | Listeria       | Firmicutes     |
| 816 | GCA_000183245.1_ASM18324v1_genomic.fna    | Buchnera       | Proteobacteria |
| 817 | GCA_000832765.1_ASM83276v1_genomic.fna    | Bacillus       | Firmicutes     |
| 818 | GCA_002078455.1_ASM207845v1_genomic.fna   | Lactococcus    | Firmicutes     |
| 819 | GCA_000993745.1_ASM99374v1_genomic.fna    | Streptococcus  | Firmicutes     |
| 820 | GCA_001275545.2_ASM127554v2_genomic.fna   | Streptococcus  | Firmicutes     |
| 821 | GCA_900094135.1_ASM90009413v1_genomic.fna | Streptococcus  | Firmicutes     |
| 822 | GCA_000422045.1_ASM42204v1_genomic.fna    | Streptococcus  | Firmicutes     |
| 823 | GCA_000210995.1_ASM21099v1_genomic.fna    | Streptococcus  | Firmicutes     |
| 824 | GCA_000832635.1_ASM83263v1_genomic.fna    | Bacillus       | Firmicutes     |
| 825 | GCA_000018225.1_ASM1822v1_genomic.fna     | Rickettsia     | Proteobacteria |
| 826 | GCA_000017105.1_ASM1710v1_genomic.fna     | Coxiella       | Proteobacteria |
| 827 | GCA_000026485.1_ASM2648v1_genomic.fna     | Lactobacillus  | Firmicutes     |
| 828 | GCA_000146565.1_ASM14656v1_genomic.fna    | Bacillus       | Firmicutes     |
| 829 | GCA_000018245.1_ASM1824v1_genomic.fna     | Rickettsia     | Proteobacteria |
| 830 | GCA_000015385.1_ASM1538v1_genomic.fna     | Lactobacillus  | Firmicutes     |
| 831 | GCA_000833235.1_ASM83323v1_genomic.fna    | Francisella    | Proteobacteria |
| 832 | GCA_000772165.1_ASM77216v1_genomic.fna    | Bacillus       | Firmicutes     |
| 833 | GCA_000832925.1_ASM83292v1_genomic.fna    | Bacillus       | Firmicutes     |
| 834 | GCA_000085225.1_ASM8522v1_genomic.fna     | Clostridioides | Firmicutes     |
| 835 | GCA_000089865.1_ASM8986v1_genomic.fna     | Mycoplasma     | Tenericutes    |
| 836 | GCA_000014405.1_ASM1440v1_genomic.fna     | Lactobacillus  | Firmicutes     |
| 837 | GCA_000192395.2_ASM19239v2_genomic.fna    | Mycoplasma     | Tenericutes    |
| 838 | GCA_001281025.1_ASM128102v1_genomic.fna   | Streptococcus  | Firmicutes     |
| 839 | GCA_000009245.1_ASM924v1_genomic.fna      | Francisella    | Proteobacteria |
| 840 | GCA_000497525.2_ASM49752v2_genomic.fna    | Bacillus       | Firmicutes     |
| 841 | GCA_000253315.1_ASM25331v1_genomic.fna    | Streptococcus  | Firmicutes     |
| 842 | GCA_000400955.1_ASM40095v1_genomic.fna    | Spiroplasma    | Tenericutes    |
| 843 | GCA_000400935.1_ASM40093v1_genomic.fna    | Spiroplasma    | Tenericutes    |
| 844 | GCA_000439455.1_ASM43945v1_genomic.fna    | Spiroplasma    | Tenericutes    |
| 845 | GCA_000010005.1_ASM1000v1_genomic.fna     | Lactobacillus  | Firmicutes     |
| 846 | GCA_000017885.4_ASM1788v4_genomic.fna     | Bacillus       | Firmicutes     |
| 847 | GCA_000500935.1_ASM50093v1_genomic.fna    | Spiroplasma    | Tenericutes    |

848 GCA\_000565215.1\_ASM56521v1\_genomic.fna  
 849 GCA\_000565175.1\_ASM56517v1\_genomic.fna  
 850 GCA\_000292405.1\_ASM29240v1\_genomic.fna  
 851 GCA\_000011825.1\_ASM1182v1\_genomic.fna  
 852 GCA\_000008425.1\_ASM842v1\_genomic.fna  
 853 GCA\_000494875.1\_ASM49487v1\_genomic.fna  
 854 GCA\_001518795.1\_ASM151879v1\_genomic.fna  
 855 GCA\_000008225.1\_ASM822v1\_genomic.fna  
 856 GCA\_000018185.1\_ASM1818v1\_genomic.fna  
 857 GCA\_000445425.4\_ASM44542v4\_genomic.fna  
 858 GCA\_000012705.1\_ASM1270v1\_genomic.fna  
 859 GCA\_000007285.1\_ASM728v1\_genomic.fna  
 860 GCA\_000006885.1\_ASM688v1\_genomic.fna  
 861 GCA\_000158275.2\_ASM15827v2\_genomic.fna  
 862 GCA\_000008165.1\_ASM816v1\_genomic.fna  
 863 GCA\_002024265.1\_ASM202426v1\_genomic.fna  
 864 GCA\_000009685.1\_ASM968v1\_genomic.fna  
 865 GCA\_001006005.1\_ASM100600v1\_genomic.fna  
 866 GCA\_000011465.1\_ASM1146v1\_genomic.fna  
 867 GCA\_000007725.1\_ASM772v1\_genomic.fna  
 868 GCA\_000009585.1\_ASM958v1\_genomic.fna  
 869 GCA\_000473995.1\_ASM47399v1\_genomic.fna  
 870 GCA\_000484505.1\_ASM48450v1\_genomic.fna  
 871 GCA\_000009005.1\_ASM900v1\_genomic.fna  
 872 GCA\_000011925.1\_ASM1192v1\_genomic.fna  
 873 GCA\_000009425.1\_ASM942v1\_genomic.fna  
 874 GCA\_000008285.1\_ASM828v1\_genomic.fna  
 875 GCA\_000008005.1\_ASM800v1\_genomic.fna  
 876 GCA\_000473245.1\_ASM47324v1\_genomic.fna  
 877 GCA\_000011625.1\_ASM1162v1\_genomic.fna  
 878 GCA\_000021185.1\_ASM2118v1\_genomic.fna  
 879 GCA\_000014545.1\_ASM1454v1\_genomic.fna  
 880 GCA\_000751035.1\_PM221\_genomic.fna  
 881 GCA\_000816265.1\_ASM81626v1\_genomic.fna

|                 |                |
|-----------------|----------------|
| Spiroplasma     | Tenericutes    |
| Spiroplasma     | Tenericutes    |
| Mycoplasma      | Tenericutes    |
| Streptococcus   | Firmicutes     |
| Bacillus        | Firmicutes     |
| Staphylococcus  | Firmicutes     |
| Aerococcus      | Firmicutes     |
| Mycoplasma      | Tenericutes    |
| Streptococcus   | Firmicutes     |
| Borrelia        | Spirochaetes   |
| Streptococcus   | Firmicutes     |
| Streptococcus   | Firmicutes     |
| Streptococcus   | Firmicutes     |
| Fusobacterium   | Fusobacteria   |
| Bacillus        | Firmicutes     |
| Bacillus        | Firmicutes     |
| Clostridium     | Firmicutes     |
| Serratia        | Proteobacteria |
| Prochlorococcus | Cyanobacteria  |
| Buchnera        | Proteobacteria |
| Staphylococcus  | Firmicutes     |
| Clostridium     | Firmicutes     |
| Clostridium     | Firmicutes     |
| Staphylococcus  | Firmicutes     |
| Staphylococcus  | Firmicutes     |
| Lactococcus     | Firmicutes     |
| Listeria        | Firmicutes     |
| Bacillus        | Firmicutes     |
| Bacillus        | Firmicutes     |
| Bacillus        | Firmicutes     |
| Listeria        | Firmicutes     |
| Lactococcus     | Firmicutes     |
| Staphylococcus  | Firmicutes     |
| Campylobacter   | Proteobacteria |

882 GCA\_000011865.1\_ASM1186v1\_genomic.fna  
 883 GCA\_900168365.1\_JF4335\_genomic.fna  
 884 GCA\_000508245.1\_ASM50824v1\_genomic.fna  
 885 GCA\_000496285.1\_ASM49628v1\_genomic.fna  
 886 GCA\_000477415.1\_ASM47741v1\_genomic.fna  
 887 GCA\_000512145.2\_ASM51214v2\_genomic.fna  
 888 GCA\_001936255.1\_ASM193625v1\_genomic.fna  
 889 GCA\_000019045.1\_ASM1904v1\_genomic.fna  
 890 GCA\_000196455.1\_ASM19645v1\_genomic.fna  
 891 GCA\_000005825.2\_ASM582v2\_genomic.fna  
 892 GCA\_000298115.2\_ASM29811v2\_genomic.fna  
 893 GCA\_000025845.1\_ASM2584v1\_genomic.fna  
 894 GCA\_000021645.1\_ASM2164v1\_genomic.fna  
 895 GCA\_001660005.1\_ASM166000v1\_genomic.fna  
 896 GCA\_001038625.1\_ASM103862v1\_genomic.fna  
 897 GCA\_000020965.1\_ASM2096v1\_genomic.fna  
 898 GCA\_000014325.1\_ASM1432v1\_genomic.fna  
 899 GCA\_000014305.1\_ASM1430v1\_genomic.fna  
 900 GCA\_900143575.1\_LS9N\_genomic.fna  
 901 GCA\_000427055.1\_ILRI112\_genomic.fna  
 902 GCA\_000636115.1\_ASM63611v1\_genomic.fna  
 903 GCA\_001676785.2\_ASM167678v2\_genomic.fna  
 904 GCA\_000599965.1\_ASM59996v1\_genomic.fna  
 905 GCA\_001190865.1\_ASM119086v1\_genomic.fna  
 906 GCA\_002113805.1\_ASM211380v1\_genomic.fna  
 907 GCA\_000967445.1\_ASM96744v1\_genomic.fna  
 908 GCA\_001908255.1\_ASM190825v1\_genomic.fna  
 909 GCA\_001655175.1\_ASM165517v1\_genomic.fna  
 910 GCA\_000382925.1\_ASM38292v1\_genomic.fna  
 911 GCA\_001506325.1\_ASM150632v1\_genomic.fna  
 912 GCA\_000184085.1\_ASM18408v1\_genomic.fna  
 913 GCA\_000021525.1\_ASM2152v1\_genomic.fna  
 914 GCA\_000724585.1\_ASM72458v1\_genomic.fna  
 915 GCA\_000165505.1\_ASM16550v1\_genomic.fna

|                 |                |
|-----------------|----------------|
| Campylobacter   | Proteobacteria |
| Clostridium     | Firmicutes     |
| Mycoplasma      | Tenericutes    |
| Bacillus        | Firmicutes     |
| Mycoplasma      | Tenericutes    |
| Borrelia        | Spirochaetes   |
| Borrelia        | Spirochaetes   |
| Anoxybacillus   | Firmicutes     |
| Acetoanaerobium | Firmicutes     |
| Bacillus        | Firmicutes     |
| Lactobacillus   | Firmicutes     |
| Mycoplasma      | Tenericutes    |
| Dictyoglomus    | Dictyoglomi    |
| Borrelia        | Spirochaetes   |
| Clostridium     | Firmicutes     |
| Dictyoglomus    | Dictyoglomi    |
| Streptococcus   | Firmicutes     |
| Brachyspira     | Spirochaetes   |
| Streptococcus   | Firmicutes     |
| Streptococcus   | Firmicutes     |
| Bacillus        | Firmicutes     |
| Streptococcus   | Firmicutes     |
| Streptococcus   | Firmicutes     |
| Streptococcus   | Firmicutes     |
| Listeria        | Firmicutes     |
| Campylobacter   | Proteobacteria |
| Campylobacter   | Proteobacteria |
| Rickettsia      | Proteobacteria |
| Bacillus        | Firmicutes     |
| Ilyobacter      | Fusobacteria   |

|     |                                         |                    |                |
|-----|-----------------------------------------|--------------------|----------------|
| 916 | GCA_000210455.1_ASM21045v1_genomic.fna  | Clostridioides     | Firmicutes     |
| 917 | GCA_000175295.2_ASM17529v2_genomic.fna  | Thermoanaerobacter | Firmicutes     |
| 918 | GCA_000210415.1_ASM21041v1_genomic.fna  | Clostridioides     | Firmicutes     |
| 919 | GCA_001010825.1_ASM101082v1_genomic.fna | Clostridioides     | Firmicutes     |
| 920 | GCA_000211235.1_ASM21123v1_genomic.fna  | Clostridioides     | Firmicutes     |
| 921 | GCA_001984465.1_ASM198446v1_genomic.fna | Clostridioides     | Firmicutes     |
| 922 | GCA_001447175.1_ASM144717v1_genomic.fna | Clostridioides     | Firmicutes     |
| 923 | GCA_000165465.1_ASM16546v1_genomic.fna  | Halanaerobium      | Firmicutes     |
| 924 | GCA_000092245.1_ASM9224v1_genomic.fna   | Arcobacter         | Proteobacteria |
| 925 | GCA_000382945.1_ASM38294v1_genomic.fna  | Listeria           | Firmicutes     |
| 926 | GCA_000025645.1_ASM2564v1_genomic.fna   | Thermoanaerobacter | Firmicutes     |
| 927 | GCA_000145615.1_ASM14561v1_genomic.fna  | Thermoanaerobacter | Firmicutes     |
| 928 | GCA_000145275.1_ASM14527v1_genomic.fna  | Clostridium        | Firmicutes     |
| 929 | GCA_000092965.1_ASM9296v1_genomic.fna   | Thermoanaerobacter | Firmicutes     |
| 930 | GCA_001045995.2_ASM104599v2_genomic.fna | Staphylococcus     | Firmicutes     |
| 931 | GCA_001548585.1_ASM154858v1_genomic.fna | Listeria           | Firmicutes     |
| 932 | GCA_001506885.1_ASM150688v1_genomic.fna | Campylobacter      | Proteobacteria |
| 933 | GCA_001506905.1_ASM150690v1_genomic.fna | Campylobacter      | Proteobacteria |
| 934 | GCA_001548635.1_ASM154863v1_genomic.fna | Listeria           | Firmicutes     |
| 935 | GCA_001046095.2_ASM104609v2_genomic.fna | Staphylococcus     | Firmicutes     |
| 936 | GCA_001717665.1_ASM171766v1_genomic.fna | Staphylococcus     | Firmicutes     |
| 937 | GCA_001641045.1_ASM164104v1_genomic.fna | Staphylococcus     | Firmicutes     |
| 938 | GCA_001717705.1_ASM171770v1_genomic.fna | Staphylococcus     | Firmicutes     |
| 939 | GCA_001717685.1_ASM171768v1_genomic.fna | Staphylococcus     | Firmicutes     |
| 940 | GCA_000463355.1_ASM46335v1_genomic.fna  | Streptococcus      | Firmicutes     |
| 941 | GCA_000709475.1_ASM70947v1_genomic.fna  | Staphylococcus     | Firmicutes     |
| 942 | GCA_000829015.1_ASM82901v1_genomic.fna  | Clostridium        | Firmicutes     |
| 943 | GCA_001506925.1_ASM150692v1_genomic.fna | Campylobacter      | Proteobacteria |
| 944 | GCA_001889285.1_ASM188928v1_genomic.fna | Bacillus           | Firmicutes     |
| 945 | GCA_001506945.1_ASM150694v1_genomic.fna | Campylobacter      | Proteobacteria |
| 946 | GCA_000009405.1_ASM940v1_genomic.fna    | Staphylococcus     | Firmicutes     |
| 947 | GCA_000313635.1_ASM31363v1_genomic.fna  | Mycoplasma         | Tenericutes    |
| 948 | GCA_001717975.1_ASM171797v1_genomic.fna | Staphylococcus     | Firmicutes     |
| 949 | GCA_001717725.1_ASM171772v1_genomic.fna | Staphylococcus     | Firmicutes     |

|     |                                         |                |                |
|-----|-----------------------------------------|----------------|----------------|
| 950 | GCA_900155335.1_NZ15MR0322_genomic.fna  | Staphylococcus | Firmicutes     |
| 951 | GCA_001551855.1_ASM155185v1_genomic.fna | Listeria       | Firmicutes     |
| 952 | GCA_001183705.1_ASM118370v1_genomic.fna | Staphylococcus | Firmicutes     |
| 953 | GCA_001672035.1_ASM167203v1_genomic.fna | Lactobacillus  | Firmicutes     |
| 954 | GCA_002220695.1_ASM222069v1_genomic.fna | Serratia       | Proteobacteria |
| 955 | GCA_002007625.1_ASM200762v1_genomic.fna | Enterococcus   | Firmicutes     |
| 956 | GCA_001596775.2_ASM159677v2_genomic.fna | Listeria       | Firmicutes     |
| 957 | GCA_001183725.1_ASM118372v1_genomic.fna | Staphylococcus | Firmicutes     |
| 958 | GCA_001272915.1_ASM127291v1_genomic.fna | Mycoplasma     | Tenericutes    |
| 959 | GCA_002220715.1_ASM222071v1_genomic.fna | Serratia       | Proteobacteria |
| 960 | GCA_001704315.1_ASM170431v1_genomic.fna | Lactobacillus  | Firmicutes     |
| 961 | GCA_001278745.1_ASM127874v1_genomic.fna | Staphylococcus | Firmicutes     |
| 962 | GCA_001509195.1_ASM150919v1_genomic.fna | Mycoplasma     | Tenericutes    |
| 963 | GCA_001644625.1_ASM164462v1_genomic.fna | Listeria       | Firmicutes     |
| 964 | GCA_001687745.1_ASM168774v1_genomic.fna | Bacillus       | Firmicutes     |
| 965 | GCA_001723585.1_ASM172358v1_genomic.fna | Bacillus       | Firmicutes     |
| 966 | GCA_001281145.1_ASM128114v1_genomic.fna | Staphylococcus | Firmicutes     |
| 967 | GCA_001879605.1_ASM187960v1_genomic.fna | Clostridium    | Firmicutes     |
| 968 | GCA_001908335.1_ASM190833v1_genomic.fna | Listeria       | Firmicutes     |
| 969 | GCA_000772205.1_ASM77220v1_genomic.fna  | Bacillus       | Firmicutes     |
| 970 | GCA_000833335.1_ASM83333v1_genomic.fna  | Francisella    | Proteobacteria |
| 971 | GCA_001506965.1_ASM150696v1_genomic.fna | Campylobacter  | Proteobacteria |
| 972 | GCA_001506985.1_ASM150698v1_genomic.fna | Campylobacter  | Proteobacteria |
| 973 | GCA_002024245.1_ASM202424v1_genomic.fna | Enterococcus   | Firmicutes     |
| 974 | GCA_001922005.1_ASM192200v1_genomic.fna | Bacillus       | Firmicutes     |
| 975 | GCA_001448985.1_ASM144898v1_genomic.fna | Streptococcus  | Firmicutes     |
| 976 | GCA_001296985.1_ASM129698v1_genomic.fna | Staphylococcus | Firmicutes     |
| 977 | GCA_001272635.1_ASM127263v1_genomic.fna | Streptococcus  | Firmicutes     |
| 978 | GCA_001913195.1_ASM191319v1_genomic.fna | Listeria       | Firmicutes     |
| 979 | GCA_000833085.1_ASM83308v1_genomic.fna  | Bacillus       | Firmicutes     |
| 980 | GCA_001298325.2_ASM129832v2_genomic.fna | Staphylococcus | Firmicutes     |
| 981 | GCA_000183285.1_ASM18328v1_genomic.fna  | Buchnera       | Proteobacteria |
| 982 | GCA_001952735.1_ASM195273v1_genomic.fna | Listeria       | Firmicutes     |
| 983 | GCA_000307005.1_ASM30700v1_genomic.fna  | Listeria       | Firmicutes     |

|      |                                         |                |                |
|------|-----------------------------------------|----------------|----------------|
| 984  | GCA_002078475.1_ASM207847v1_genomic.fna | Lactococcus    | Firmicutes     |
| 985  | GCA_001507025.1_ASM150702v1_genomic.fna | Campylobacter  | Proteobacteria |
| 986  | GCA_000832665.1_ASM83266v1_genomic.fna  | Bacillus       | Firmicutes     |
| 987  | GCA_000211015.1_ASM21101v1_genomic.fna  | Streptococcus  | Firmicutes     |
| 988  | GCA_001507005.1_ASM150700v1_genomic.fna | Campylobacter  | Proteobacteria |
| 989  | GCA_000732425.1_ASM73242v1_genomic.fna  | Streptococcus  | Firmicutes     |
| 990  | GCA_000145595.1_ASM14559v1_genomic.fna  | Staphylococcus | Firmicutes     |
| 991  | GCA_000159535.2_ASM15953v2_genomic.fna  | Staphylococcus | Firmicutes     |
| 992  | GCA_000772225.1_ASM77222v1_genomic.fna  | Campylobacter  | Proteobacteria |
| 993  | GCA_000832845.1_ASM83284v1_genomic.fna  | Bacillus       | Firmicutes     |
| 994  | GCA_001307235.1_ASM130723v1_genomic.fna | Staphylococcus | Firmicutes     |
| 995  | GCA_002078495.1_ASM207849v1_genomic.fna | Lactococcus    | Firmicutes     |
| 996  | GCA_001952755.1_ASM195275v1_genomic.fna | Listeria       | Firmicutes     |
| 997  | GCA_000737085.1_ASM73708v1_genomic.fna  | Campylobacter  | Proteobacteria |
| 998  | GCA_000832805.1_ASM83280v1_genomic.fna  | Bacillus       | Firmicutes     |
| 999  | GCA_000183305.1_ASM18330v1_genomic.fna  | Buchnera       | Proteobacteria |
| 1000 | GCA_000743015.1_ASM74301v1_genomic.fna  | Streptococcus  | Firmicutes     |
| 1001 | GCA_000211035.2_ASM21103v2_genomic.fna  | Streptococcus  | Firmicutes     |
| 1002 | GCA_000832725.1_ASM83272v1_genomic.fna  | Bacillus       | Firmicutes     |
| 1003 | GCA_001572685.1_ASM157268v1_genomic.fna | Streptococcus  | Firmicutes     |
| 1004 | GCA_000307025.1_ASM30702v1_genomic.fna  | Listeria       | Firmicutes     |
| 1005 | GCA_000835025.1_ASM83502v1_genomic.fna  | Bacillus       | Firmicutes     |
| 1006 | GCA_001552035.1_ASM155203v1_genomic.fna | Streptococcus  | Firmicutes     |
| 1007 | GCA_001879625.1_ASM187962v1_genomic.fna | Clostridium    | Firmicutes     |
| 1008 | GCA_002173635.1_ASM217363v1_genomic.fna | Bacillus       | Firmicutes     |
| 1009 | GCA_002025045.1_ASM202504v1_genomic.fna | Enterococcus   | Firmicutes     |
| 1010 | GCA_000833355.1_ASM83335v1_genomic.fna  | Francisella    | Proteobacteria |
| 1011 | GCA_000782835.1_ASM78283v1_genomic.fna  | Bacillus       | Firmicutes     |
| 1012 | GCA_000015785.1_ASM1578v1_genomic.fna   | Bacillus       | Firmicutes     |
| 1013 | GCA_001314245.2_ASM131424v2_genomic.fna | Lactobacillus  | Firmicutes     |
| 1014 | GCA_000968375.1_ASM96837v1_genomic.fna  | Clostridium    | Firmicutes     |
| 1015 | GCA_001314945.1_ASM131494v1_genomic.fna | Lactobacillus  | Firmicutes     |
| 1016 | GCA_000695835.1_ASM69583v1_genomic.fna  | Mycoplasma     | Tenericutes    |
| 1017 | GCA_000706725.1_ASM70672v1_genomic.fna  | Bacillus       | Firmicutes     |

1018 GCA\_001442815.1\_ASM144281v1\_genomic.fna  
 1019 GCA\_000493735.1\_ASM49373v1\_genomic.fna  
 1020 GCA\_000600105.1\_ASM60010v1\_genomic.fna  
 1021 GCA\_001443645.1\_ASM144364v1\_genomic.fna  
 1022 GCA\_000785105.2\_ASM78510v2\_genomic.fna  
 1023 GCA\_001857925.1\_ASM185792v1\_genomic.fna  
 1024 GCA\_001187595.1\_ASM118759v1\_genomic.fna  
 1025 GCA\_000763575.1\_ASM76357v1\_genomic.fna  
 1026 GCA\_001455085.1\_ASM145508v1\_genomic.fna  
 1027 GCA\_000789395.1\_ASM78939v1\_genomic.fna  
 1028 GCA\_000224985.1\_ASM22498v1\_genomic.fna  
 1029 GCA\_001936235.1\_ASM193623v1\_genomic.fna  
 1030 GCA\_000163895.2\_ASM16389v2\_genomic.fna  
 1031 GCA\_000014525.1\_ASM1452v1\_genomic.fna  
 1032 GCA\_001028645.1\_ASM102864v1\_genomic.fna  
 1033 GCA\_001190745.1\_ASM119074v1\_genomic.fna  
 1034 GCA\_000332735.1\_ASM33273v1\_genomic.fna  
 1035 GCA\_002356455.1\_ASM235645v1\_genomic.fna  
 1036 GCA\_000270085.1\_ASM27008v1\_genomic.fna  
 1037 GCA\_002075105.1\_ASM207510v1\_genomic.fna  
 1038 GCA\_002173495.1\_ASM217349v1\_genomic.fna  
 1039 GCA\_000177235.2\_ASM17723v2\_genomic.fna  
 1040 GCA\_000253155.1\_ASM25315v1\_genomic.fna  
 1041 GCA\_001543285.1\_ASM154328v1\_genomic.fna  
 1042 GCA\_000019085.1\_ASM1908v1\_genomic.fna  
 1043 GCA\_001507045.1\_ASM150704v1\_genomic.fna  
 1044 GCA\_001507065.1\_ASM150706v1\_genomic.fna  
 1045 GCA\_001952775.1\_ASM195277v1\_genomic.fna  
 1046 GCA\_001444345.1\_ASM144434v1\_genomic.fna  
 1047 GCA\_001507085.1\_ASM150708v1\_genomic.fna  
 1048 GCA\_001050115.1\_ASM105011v1\_genomic.fna  
 1049 GCA\_001456215.1\_ASM145621v1\_genomic.fna  
 1050 GCA\_001952795.1\_ASM195279v1\_genomic.fna  
 1051 GCA\_001558175.1\_ASM155817v1\_genomic.fna

|                    |                |
|--------------------|----------------|
| Staphylococcus     | Firmicutes     |
| Carnobacterium     | Firmicutes     |
| Lysinibacillus     | Firmicutes     |
| Lactobacillus      | Firmicutes     |
| Lactobacillus      | Firmicutes     |
| Bacillus           | Firmicutes     |
| Anoxybacillus      | Firmicutes     |
| Thermoanaerobacter | Firmicutes     |
| Fusobacterium      | Fusobacteria   |
| Clostridium        | Firmicutes     |
| Lactobacillus      | Firmicutes     |
| Lactobacillus      | Firmicutes     |
| Filifactor         | Firmicutes     |
| Lactobacillus      | Firmicutes     |
| Staphylococcus     | Firmicutes     |
| Campylobacter      | Proteobacteria |
| Staphylococcus     | Firmicutes     |
| Fusobacterium      | Fusobacteria   |
| Erysipelothrix     | Firmicutes     |
| Lactobacillus      | Firmicutes     |
| Bacillus           | Firmicutes     |
| Bacillus           | Firmicutes     |
| Streptococcus      | Firmicutes     |
| Aerococcus         | Firmicutes     |
| Thermoanaerobacter | Firmicutes     |
| Campylobacter      | Proteobacteria |
| Campylobacter      | Proteobacteria |
| Listeria           | Firmicutes     |
| Staphylococcus     | Firmicutes     |
| Campylobacter      | Proteobacteria |
| Bacillus           | Firmicutes     |
| Staphylococcus     | Firmicutes     |
| Listeria           | Firmicutes     |
| Mycoplasma         | Tenericutes    |

1052 GCA\_001767275.1\_ASM176727v1\_genomic.fna  
 1053 GCA\_001507105.1\_ASM150710v1\_genomic.fna  
 1054 GCA\_001998915.1\_ASM199891v1\_genomic.fna  
 1055 GCA\_001457495.1\_NCTC13435\_genomic.fna  
 1056 GCA\_001507125.1\_ASM150712v1\_genomic.fna  
 1057 GCA\_001507145.1\_ASM150714v1\_genomic.fna  
 1058 GCA\_001704335.1\_ASM170433v1\_genomic.fna  
 1059 GCA\_900029885.1\_Sm\_SMB2099\_genomic.fna  
 1060 GCA\_001998945.1\_ASM199894v1\_genomic.fna  
 1061 GCA\_001752685.1\_ASM175268v1\_genomic.fna  
 1062 GCA\_001854345.1\_ASM185434v1\_genomic.fna  
 1063 GCA\_001465635.1\_ASM146563v1\_genomic.fna  
 1064 GCA\_002209305.1\_ASM220930v1\_genomic.fna  
 1065 GCA\_001886775.1\_ASM188677v1\_genomic.fna  
 1066 GCA\_000789275.1\_ASM78927v1\_genomic.fna  
 1067 GCA\_001715615.1\_ASM171561v1\_genomic.fna  
 1068 GCA\_001998985.1\_ASM199898v1\_genomic.fna  
 1069 GCA\_001465675.1\_ASM146567v1\_genomic.fna  
 1070 GCA\_001901705.1\_ASM190170v1\_genomic.fna  
 1071 GCA\_002025065.1\_ASM202506v1\_genomic.fna  
 1072 GCA\_001507165.1\_ASM150716v1\_genomic.fna  
 1073 GCA\_000186405.1\_ASM18640v1\_genomic.fna  
 1074 GCA\_001507185.1\_ASM150718v1\_genomic.fna  
 1075 GCA\_000427215.1\_ASM42721v1\_genomic.fna  
 1076 GCA\_001999025.1\_ASM199902v1\_genomic.fna  
 1077 GCA\_001592385.1\_ASM159238v1\_genomic.fna  
 1078 GCA\_001515665.1\_ASM151566v1\_genomic.fna  
 1079 GCA\_000833375.1\_ASM83337v1\_genomic.fna  
 1080 GCA\_001999005.1\_ASM199900v1\_genomic.fna  
 1081 GCA\_000940785.1\_ASM94078v1\_genomic.fna  
 1082 GCA\_001465755.1\_ASM146575v1\_genomic.fna  
 1083 GCA\_000756485.1\_ASM75648v1\_genomic.fna  
 1084 GCA\_001634675.1\_ASM163467v1\_genomic.fna  
 1085 GCA\_000258885.1\_ASM25888v1\_genomic.fna

|                |                |
|----------------|----------------|
| Pediococcus    | Firmicutes     |
| Campylobacter  | Proteobacteria |
| Listeria       | Firmicutes     |
| Staphylococcus | Firmicutes     |
| Campylobacter  | Proteobacteria |
| Campylobacter  | Proteobacteria |
| Lactobacillus  | Firmicutes     |
| Serratia       | Proteobacteria |
| Listeria       | Firmicutes     |
| Bacillus       | Firmicutes     |
| Bacillus       | Firmicutes     |
| Staphylococcus | Firmicutes     |
| Bacillus       | Firmicutes     |
| Clostridium    | Firmicutes     |
| Bacillus       | Firmicutes     |
| Lactobacillus  | Firmicutes     |
| Listeria       | Firmicutes     |
| Staphylococcus | Firmicutes     |
| Mycoplasma     | Tenericutes    |
| Enterococcus   | Firmicutes     |
| Campylobacter  | Proteobacteria |
| Streptococcus  | Firmicutes     |
| Campylobacter  | Proteobacteria |
| Mycoplasma     | Tenericutes    |
| Listeria       | Firmicutes     |
| Streptococcus  | Firmicutes     |
| Staphylococcus | Firmicutes     |
| Francisella    | Proteobacteria |
| Listeria       | Firmicutes     |
| Bacillus       | Firmicutes     |
| Staphylococcus | Firmicutes     |
| Streptococcus  | Firmicutes     |
| Bacillus       | Firmicutes     |
| Bacillus       | Firmicutes     |



|      |                                         |                 |                |
|------|-----------------------------------------|-----------------|----------------|
| 1086 | GCA_000019005.1_ASM1900v1_genomic.fna   | Streptococcus   | Firmicutes     |
| 1087 | GCA_000011665.1_ASM1166v1_genomic.fna   | Streptococcus   | Firmicutes     |
| 1088 | GCA_000521525.1_ASM52152v1_genomic.fna  | Buchnera        | Proteobacteria |
| 1089 | GCA_001610935.1_ASM161093v1_genomic.fna | Streptococcus   | Firmicutes     |
| 1090 | GCA_000832745.1_ASM83274v1_genomic.fna  | Bacillus        | Firmicutes     |
| 1091 | GCA_000211055.2_ASM21105v2_genomic.fna  | Streptococcus   | Firmicutes     |
| 1092 | GCA_001296085.1_ASM129608v1_genomic.fna | Fusobacterium   | Fusobacteria   |
| 1093 | GCA_001507205.1_ASM150720v1_genomic.fna | Campylobacter   | Proteobacteria |
| 1094 | GCA_000160335.2_ASM16033v2_genomic.fna  | Staphylococcus  | Firmicutes     |
| 1095 | GCA_001515685.1_ASM151568v1_genomic.fna | Staphylococcus  | Firmicutes     |
| 1096 | GCA_000015645.1_ASM1564v1_genomic.fna   | Prochlorococcus | Cyanobacteria  |
| 1097 | GCA_000807355.1_ASM80735v1_genomic.fna  | Campylobacter   | Proteobacteria |
| 1098 | GCA_001515705.1_ASM151570v1_genomic.fna | Staphylococcus  | Firmicutes     |
| 1099 | GCA_000830775.1_ASM83077v1_genomic.fna  | Campylobacter   | Proteobacteria |
| 1100 | GCA_001507225.1_ASM150722v1_genomic.fna | Campylobacter   | Proteobacteria |
| 1101 | GCA_001579785.1_ASM157978v1_genomic.fna | Clostridium     | Firmicutes     |
| 1102 | GCA_000093125.2_ASM9312v2_genomic.fna   | Listeria        | Firmicutes     |
| 1103 | GCA_000204665.1_ASM20466v1_genomic.fna  | Staphylococcus  | Firmicutes     |
| 1104 | GCA_001999065.1_ASM199906v1_genomic.fna | Listeria        | Firmicutes     |
| 1105 | GCA_000217635.1_ASM21763v1_genomic.fna  | Buchnera        | Proteobacteria |
| 1106 | GCA_000307045.1_ASM30704v1_genomic.fna  | Listeria        | Firmicutes     |
| 1107 | GCA_002078615.1_ASM207861v1_genomic.fna | Lactococcus     | Firmicutes     |
| 1108 | GCA_000832865.1_ASM83286v1_genomic.fna  | Bacillus        | Firmicutes     |
| 1109 | GCA_001999045.1_ASM199904v1_genomic.fna | Listeria        | Firmicutes     |
| 1110 | GCA_000307065.1_ASM30706v1_genomic.fna  | Listeria        | Firmicutes     |
| 1111 | GCA_000017905.1_ASM1790v1_genomic.fna   | Campylobacter   | Proteobacteria |
| 1112 | GCA_002201975.1_ASM220197v1_genomic.fna | Bacillus        | Firmicutes     |
| 1113 | GCA_002201935.1_ASM220193v1_genomic.fna | Bacillus        | Firmicutes     |
| 1114 | GCA_000521545.1_ASM52154v1_genomic.fna  | Buchnera        | Proteobacteria |
| 1115 | GCA_000025425.1_ASM2542v1_genomic.fna   | Campylobacter   | Proteobacteria |
| 1116 | GCA_000767505.1_ASM76750v1_genomic.fna  | Streptococcus   | Firmicutes     |
| 1117 | GCA_000021225.1_ASM2122v1_genomic.fna   | Bacillus        | Firmicutes     |
| 1118 | GCA_000192705.1_ASM19270v1_genomic.fna  | Lactococcus     | Firmicutes     |
| 1119 | GCA_000833045.1_ASM83304v1_genomic.fna  | Bacillus        | Firmicutes     |

|      |                                         |                 |                |
|------|-----------------------------------------|-----------------|----------------|
| 1120 | GCA_002085695.1_ASM208569v1_genomic.fna | Staphylococcus  | Firmicutes     |
| 1121 | GCA_002078765.1_ASM207876v1_genomic.fna | Lactococcus     | Firmicutes     |
| 1122 | GCA_000010445.1_ASM1044v1_genomic.fna   | Staphylococcus  | Firmicutes     |
| 1123 | GCA_000010465.1_ASM1046v1_genomic.fna   | Staphylococcus  | Firmicutes     |
| 1124 | GCA_000236475.1_ASM23647v1_genomic.fna  | Lactococcus     | Firmicutes     |
| 1125 | GCA_002215535.1_ASM221553v1_genomic.fna | Staphylococcus  | Firmicutes     |
| 1126 | GCA_001592425.1_ASM159242v1_genomic.fna | Streptococcus   | Firmicutes     |
| 1127 | GCA_000021305.1_ASM2130v1_genomic.fna   | Bacillus        | Firmicutes     |
| 1128 | GCA_001854085.1_ASM185408v1_genomic.fna | Clostridium     | Firmicutes     |
| 1129 | GCA_000168575.2_ASM16857v2_genomic.fna  | Listeria        | Firmicutes     |
| 1130 | GCA_001017635.1_ASM101763v1_genomic.fna | Bacillus        | Firmicutes     |
| 1131 | GCA_001640765.1_ASM164076v1_genomic.fna | Streptococcus   | Firmicutes     |
| 1132 | GCA_000211075.1_ASM21107v1_genomic.fna  | Streptococcus   | Firmicutes     |
| 1133 | GCA_000832785.1_ASM83278v1_genomic.fna  | Bacillus        | Firmicutes     |
| 1134 | GCA_000789295.1_ASM78929v1_genomic.fna  | Bacillus        | Firmicutes     |
| 1135 | GCA_001889325.1_ASM188932v1_genomic.fna | Clostridium     | Firmicutes     |
| 1136 | GCA_000225445.1_ASM22544v1_genomic.fna  | Buchnera        | Proteobacteria |
| 1137 | GCA_002334625.1_ASM233462v1_genomic.fna | Enterococcus    | Firmicutes     |
| 1138 | GCA_000011765.2_ASM1176v2_genomic.fna   | Streptococcus   | Firmicutes     |
| 1139 | GCA_002090215.1_ASM209021v1_genomic.fna | Mycoplasma      | Tenericutes    |
| 1140 | GCA_000833475.1_ASM83347v1_genomic.fna  | Francisella     | Proteobacteria |
| 1141 | GCA_000015665.1_ASM1566v1_genomic.fna   | Prochlorococcus | Cyanobacteria  |
| 1142 | GCA_000512835.2_ASM51283v2_genomic.fna  | Bacillus        | Firmicutes     |
| 1143 | GCA_001857985.1_ASM185798v1_genomic.fna | Bacillus        | Firmicutes     |
| 1144 | GCA_002005345.1_ASM200534v1_genomic.fna | Bacillus        | Firmicutes     |
| 1145 | GCA_002257505.1_ASM225750v1_genomic.fna | Mycoplasma      | Tenericutes    |
| 1146 | GCA_000204625.1_ASM20462v1_genomic.fna  | Streptococcus   | Firmicutes     |
| 1147 | GCA_001296145.1_ASM129614v1_genomic.fna | Fusobacterium   | Fusobacteria   |
| 1148 | GCA_001874125.1_ASM187412v1_genomic.fna | Lactobacillus   | Firmicutes     |
| 1149 | GCA_000019025.1_ASM1902v1_genomic.fna   | Streptococcus   | Firmicutes     |
| 1150 | GCA_002074115.1_ASM207411v1_genomic.fna | Bacillus        | Firmicutes     |
| 1151 | GCA_000698885.1_ASM69888v1_genomic.fna  | Streptococcus   | Firmicutes     |
| 1152 | GCA_001046835.1_ASM104683v1_genomic.fna | Lactobacillus   | Firmicutes     |
| 1153 | GCA_001431785.1_ASM143178v1_genomic.fna | Bacillus        | Firmicutes     |

1154 GCA\_000427075.1\_ILRI005\_genomic.fna  
 1155 GCA\_000292455.1\_ASM29245v1\_genomic.fna  
 1156 GCA\_000815025.1\_ASM81502v1\_genomic.fna  
 1157 GCA\_000808095.1\_ASM80809v1\_genomic.fna  
 1158 GCA\_001888925.1\_ASM188892v1\_genomic.fna  
 1159 GCA\_002009215.1\_ASM200921v1\_genomic.fna  
 1160 GCA\_000814265.1\_ASM81426v1\_genomic.fna  
 1161 GCA\_002073835.1\_ASM207383v1\_genomic.fna  
 1162 GCA\_000016105.1\_ASM1610v1\_genomic.fna  
 1163 GCA\_000815225.1\_ASM81522v1\_genomic.fna  
 1164 GCA\_002074155.1\_ASM207415v1\_genomic.fna  
 1165 GCA\_000816785.1\_ASM81678v1\_genomic.fna  
 1166 GCA\_000831065.1\_ASM83106v1\_genomic.fna  
 1167 GCA\_000828855.1\_ASM82885v1\_genomic.fna  
 1168 GCA\_000831645.3\_ASM83164v3\_genomic.fna  
 1169 GCA\_000829395.1\_ASM82939v1\_genomic.fna  
 1170 GCA\_000736415.1\_ASM73641v1\_genomic.fna  
 1171 GCA\_000941075.1\_ASM94107v1\_genomic.fna  
 1172 GCA\_001042715.1\_ASM104271v1\_genomic.fna  
 1173 GCA\_000953715.1\_DTL3\_genomic.fna  
 1174 GCA\_000973545.1\_ASM97354v1\_genomic.fna  
 1175 GCA\_000973505.1\_ASM97350v1\_genomic.fna  
 1176 GCA\_001902315.1\_ASM190231v1\_genomic.fna  
 1177 GCA\_000236925.1\_ASM23692v1\_genomic.fna  
 1178 GCA\_000577895.1\_M2\_40\_genomic.fna  
 1179 GCA\_001618885.1\_ASM161888v1\_genomic.fna  
 1180 GCA\_000965765.1\_ASM96576v1\_genomic.fna  
 1181 GCA\_001999105.1\_ASM199910v1\_genomic.fna  
 1182 GCA\_001515765.1\_ASM151576v1\_genomic.fna  
 1183 GCA\_001515745.1\_ASM151574v1\_genomic.fna  
 1184 GCA\_001999085.1\_ASM199908v1\_genomic.fna  
 1185 GCA\_001507245.1\_ASM150724v1\_genomic.fna  
 1186 GCA\_001507265.1\_ASM150726v1\_genomic.fna  
 1187 GCA\_001880185.1\_ASM188018v1\_genomic.fna

|                 |                |
|-----------------|----------------|
| Streptococcus   | Firmicutes     |
| Bacillus        | Firmicutes     |
| Coxiella        | Proteobacteria |
| Borrelia        | Spirochaetes   |
| Lactobacillus   | Firmicutes     |
| Mycoplasma      | Tenericutes    |
| Campylobacter   | Proteobacteria |
| Streptococcus   | Firmicutes     |
| Francisella     | Proteobacteria |
| Allofrancisella | Proteobacteria |
| Clostridium     | Firmicutes     |
| Campylobacter   | Proteobacteria |
| Bacillus        | Firmicutes     |
| Mycoplasma      | Tenericutes    |
| Lactobacillus   | Firmicutes     |
| Lactobacillus   | Firmicutes     |
| Campylobacter   | Proteobacteria |
| Mycoplasma      | Tenericutes    |
| Clostridium     | Firmicutes     |
| Deinoflexus     | Thermotogae    |
| Blochmannia     | Proteobacteria |
| Blochmannia     | Proteobacteria |
| Staphylococcus  | Firmicutes     |
| Staphylococcus  | Firmicutes     |
| Clostridium     | Firmicutes     |
| Staphylococcus  | Firmicutes     |
| Mycoplasma      | Tenericutes    |
| Listeria        | Firmicutes     |
| Staphylococcus  | Firmicutes     |
| Staphylococcus  | Firmicutes     |
| Listeria        | Firmicutes     |
| Campylobacter   | Proteobacteria |
| Campylobacter   | Proteobacteria |
| Lactobacillus   | Firmicutes     |

|      |                                         |                |                |
|------|-----------------------------------------|----------------|----------------|
| 1188 | GCA_001548295.1_ASM154829v1_genomic.fna | Staphylococcus | Firmicutes     |
| 1189 | GCA_001999125.1_ASM199912v1_genomic.fna | Listeria       | Firmicutes     |
| 1190 | GCA_001563565.1_ASM156356v1_genomic.fna | Campylobacter  | Proteobacteria |
| 1191 | GCA_001587015.1_ASM158701v1_genomic.fna | Campylobacter  | Proteobacteria |
| 1192 | GCA_001999145.1_ASM199914v1_genomic.fna | Listeria       | Firmicutes     |
| 1193 | GCA_001548415.1_ASM154841v1_genomic.fna | Staphylococcus | Firmicutes     |
| 1194 | GCA_000833495.1_ASM83349v1_genomic.fna  | Francisella    | Proteobacteria |
| 1195 | GCA_001999165.1_ASM199916v1_genomic.fna | Listeria       | Firmicutes     |
| 1196 | GCA_002090235.1_ASM209023v1_genomic.fna | Mycoplasma     | Tenericutes    |
| 1197 | GCA_002442955.1_ASM244295v1_genomic.fna | Enterococcus   | Firmicutes     |
| 1198 | GCA_001889345.1_ASM188934v1_genomic.fna | Clostridium    | Firmicutes     |
| 1199 | GCA_000827065.1_ASM82706v1_genomic.fna  | Bacillus       | Firmicutes     |
| 1200 | GCA_000832965.1_ASM83296v1_genomic.fna  | Bacillus       | Firmicutes     |
| 1201 | GCA_001683515.1_ASM168351v1_genomic.fna | Streptococcus  | Firmicutes     |
| 1202 | GCA_000211095.1_ASM21109v1_genomic.fna  | Streptococcus  | Firmicutes     |
| 1203 | GCA_001587035.1_ASM158703v1_genomic.fna | Campylobacter  | Proteobacteria |
| 1204 | GCA_001182785.1_ASM118278v1_genomic.fna | Bacillus       | Firmicutes     |
| 1205 | GCA_001549655.1_ASM154965v1_genomic.fna | Staphylococcus | Firmicutes     |
| 1206 | GCA_001686905.1_ASM168690v1_genomic.fna | Campylobacter  | Proteobacteria |
| 1207 | GCA_001549675.1_ASM154967v1_genomic.fna | Staphylococcus | Firmicutes     |
| 1208 | GCA_001721625.1_ASM172162v1_genomic.fna | Streptococcus  | Firmicutes     |
| 1209 | GCA_002043045.1_ASM204304v1_genomic.fna | Listeria       | Firmicutes     |
| 1210 | GCA_000307085.1_ASM30708v1_genomic.fna  | Listeria       | Firmicutes     |
| 1211 | GCA_002007885.1_ASM200788v1_genomic.fna | Clostridioides | Firmicutes     |
| 1212 | GCA_002078855.1_ASM207885v1_genomic.fna | Lactococcus    | Firmicutes     |
| 1213 | GCA_000367725.3_Z3055_genomic.fna       | Coxiella       | Proteobacteria |
| 1214 | GCA_000835185.1_ASM83518v1_genomic.fna  | Bacillus       | Firmicutes     |
| 1215 | GCA_001558795.1_ASM155879v1_genomic.fna | Staphylococcus | Firmicutes     |
| 1216 | GCA_000293765.1_ASM29376v1_genomic.fna  | Bacillus       | Firmicutes     |
| 1217 | GCA_002101275.1_ASM210127v1_genomic.fna | Listeria       | Firmicutes     |
| 1218 | GCA_000772185.1_ASM77218v1_genomic.fna  | Streptococcus  | Firmicutes     |
| 1219 | GCA_000521585.1_ASM52158v1_genomic.fna  | Buchnera       | Proteobacteria |
| 1220 | GCA_002105615.1_ASM210561v1_genomic.fna | Listeria       | Firmicutes     |
| 1221 | GCA_000978375.1_ASM97837v1_genomic.fna  | Bacillus       | Firmicutes     |

1222 GCA\_002078895.1\_ASM207889v1\_genomic.fna  
 1223 GCA\_000277265.1\_ASM27726v1\_genomic.fna  
 1224 GCA\_000307615.1\_ASM30761v1\_genomic.fna  
 1225 GCA\_000019305.1\_ASM1930v1\_genomic.fna  
 1226 GCA\_000418515.1\_ASM41851v1\_genomic.fna  
 1227 GCA\_000210315.1\_ASM21031v1\_genomic.fna  
 1228 GCA\_001717625.1\_ASM171762v1\_genomic.fna  
 1229 GCA\_000961015.1\_ASM96101v1\_genomic.fna  
 1230 GCA\_000283955.1\_ASM28395v1\_genomic.fna  
 1231 GCA\_000830805.1\_ASM83080v1\_genomic.fna  
 1232 GCA\_000830825.1\_ASM83082v1\_genomic.fna  
 1233 GCA\_001721945.1\_ASM172194v1\_genomic.fna  
 1234 GCA\_002119645.1\_ASM211964v1\_genomic.fna  
 1235 GCA\_001267815.1\_ASM126781v1\_genomic.fna  
 1236 GCA\_000237125.1\_ASM23712v1\_genomic.fna  
 1237 GCA\_001580495.1\_ASM158049v1\_genomic.fna  
 1238 GCA\_000251085.2\_ASM25108v2\_genomic.fna  
 1239 GCA\_002105635.1\_ASM210563v1\_genomic.fna  
 1240 GCA\_000833065.1\_ASM83306v1\_genomic.fna  
 1241 GCA\_001936415.1\_ASM193641v1\_genomic.fna  
 1242 GCA\_001580515.1\_ASM158051v1\_genomic.fna  
 1243 GCA\_000494835.1\_ASM49483v1\_genomic.fna  
 1244 GCA\_001712835.1\_ASM171283v1\_genomic.fna  
 1245 GCA\_001721985.1\_ASM172198v1\_genomic.fna  
 1246 GCA\_001721965.1\_ASM172196v1\_genomic.fna  
 1247 GCA\_002151485.1\_ASM215148v1\_genomic.fna  
 1248 GCA\_000772245.1\_ASM77224v1\_genomic.fna  
 1249 GCA\_000550745.1\_ASM55074v1\_genomic.fna  
 1250 GCA\_000833455.1\_ASM83345v1\_genomic.fna  
 1251 GCA\_001721925.1\_ASM172192v1\_genomic.fna  
 1252 GCA\_000833515.1\_ASM83351v1\_genomic.fna  
 1253 GCA\_002009195.1\_ASM200919v1\_genomic.fna  
 1254 GCA\_000953615.1\_BS49Ch\_genomic.fna  
 1255 GCA\_001412695.1\_ASM141269v1\_genomic.fna

|                |                |
|----------------|----------------|
| Lactococcus    | Firmicutes     |
| Rickettsia     | Proteobacteria |
| Listeria       | Firmicutes     |
| Clostridium    | Firmicutes     |
| Lactobacillus  | Firmicutes     |
| Staphylococcus | Firmicutes     |
| Campylobacter  | Proteobacteria |
| Lactobacillus  | Firmicutes     |
| Rickettsia     | Proteobacteria |
| Campylobacter  | Proteobacteria |
| Campylobacter  | Proteobacteria |
| Lactobacillus  | Firmicutes     |
| Mycoplasma     | Tenericutes    |
| Staphylococcus | Firmicutes     |
| Staphylococcus | Firmicutes     |
| Streptococcus  | Firmicutes     |
| Listeria       | Firmicutes     |
| Bacillus       | Firmicutes     |
| Streptococcus  | Firmicutes     |
| Staphylococcus | Firmicutes     |
| Bacillus       | Firmicutes     |
| Streptococcus  | Firmicutes     |
| Campylobacter  | Proteobacteria |
| Campylobacter  | Proteobacteria |
| Borrelia       | Spirochaetes   |
| Streptococcus  | Firmicutes     |
| Enterococcus   | Firmicutes     |
| Francisella    | Proteobacteria |
| Lactobacillus  | Firmicutes     |
| Francisella    | Proteobacteria |
| Bacillus       | Firmicutes     |
| Bacillus       | Firmicutes     |
| Enterococcus   | Firmicutes     |

|      |                                                                |                |                |
|------|----------------------------------------------------------------|----------------|----------------|
| 1256 | GCA_001594205.1_ASM159420v1_genomic.fna                        | Staphylococcus | Firmicutes     |
| 1257 | GCA_001183785.1_ASM118378v1_genomic.fna                        | Bacillus       | Firmicutes     |
| 1258 | GCA_002105655.1_ASM210565v1_genomic.fna                        | Listeria       | Firmicutes     |
| 1259 | GCA_002090275.1_ASM209027v1_genomic.fna                        | Mycoplasma     | Tenericutes    |
| 1260 | GCA_001908455.1_ASM190845v1_genomic.fna                        | Lactobacillus  | Firmicutes     |
| 1261 | GCA_001891125.1_ASM189112v1_genomic.fna                        | Leuconostoc    | Firmicutes     |
| 1262 | GCA_001294565.1_ASM129456v1_genomic.fna                        | Serratia       | Proteobacteria |
| 1263 | GCA_000604105.1_ASM60410v1_genomic.fna                         | Lactobacillus  | Firmicutes     |
| 1264 | GCA_002057535.1_ASM205753v1_genomic.fna                        | Bacillus       | Firmicutes     |
| 1265 | GCA_002072695.1_ASM207269v1_genomic.fna                        | Bacillus       | Firmicutes     |
| 1266 | GCA_002117375.1_ASM211737v1_genomic.fna                        | Lactobacillus  | Firmicutes     |
| 1267 | GCA_900066025.1_Enterococcus_faecium_E1002_isolate_genomic.fna | Enterococcus   | Firmicutes     |
| 1268 | GCA_001611325.1_ASM161132v1_genomic.fna                        | Staphylococcus | Firmicutes     |
| 1269 | GCA_002105675.1_ASM210567v1_genomic.fna                        | Listeria       | Firmicutes     |
| 1270 | GCA_000387745.2_ASM38774v2_genomic.fna                         | Mycoplasma     | Tenericutes    |
| 1271 | GCA_001017575.1_ASM101757v1_genomic.fna                        | Campylobacter  | Proteobacteria |
| 1272 | GCA_002090295.1_ASM209029v1_genomic.fna                        | Mycoplasma     | Tenericutes    |
| 1273 | GCA_001417635.1_ASM141763v1_genomic.fna                        | Campylobacter  | Proteobacteria |
| 1274 | GCA_900092475.1_Ef_aus00233_genomic.fna                        | Enterococcus   | Firmicutes     |
| 1275 | GCA_900094615.1_ASM90009461v1_genomic.fna                      | Lactobacillus  | Firmicutes     |
| 1276 | GCA_000971925.1_ASM97192v1_genomic.fna                         | Bacillus       | Firmicutes     |
| 1277 | GCA_900187195.1_51485_F01_genomic.fna                          | Listeria       | Firmicutes     |
| 1278 | GCA_000833535.1_ASM83353v1_genomic.fna                         | Francisella    | Proteobacteria |
| 1279 | GCA_001990145.1_ASM199014v1_genomic.fna                        | Lactobacillus  | Firmicutes     |
| 1280 | GCA_000286715.1_ASM28671v1_genomic.fna                         | Mycoplasma     | Tenericutes    |
| 1281 | GCA_001611895.1_ASM161189v1_genomic.fna                        | Mycoplasma     | Tenericutes    |
| 1282 | GCA_001420855.1_ASM142085v1_genomic.fna                        | Bacillus       | Firmicutes     |
| 1283 | GCA_002176855.1_ASM217685v1_genomic.fna                        | Lactobacillus  | Firmicutes     |
| 1284 | GCA_001729925.1_ASM172992v1_genomic.fna                        | Streptococcus  | Firmicutes     |
| 1285 | GCA_001514415.1_ASM151441v1_genomic.fna                        | Lactobacillus  | Firmicutes     |
| 1286 | GCA_002111405.1_ASM211140v1_genomic.fna                        | Streptococcus  | Firmicutes     |
| 1287 | GCA_000833125.1_ASM83312v1_genomic.fna                         | Bacillus       | Firmicutes     |
| 1288 | GCA_002357195.1_ASM235719v1_genomic.fna                        | Rickettsia     | Proteobacteria |
| 1289 | GCA_002407165.1_ASM240716v1_genomic.fna                        | Staphylococcus | Firmicutes     |

|      |                                           |                |                |
|------|-------------------------------------------|----------------|----------------|
| 1290 | GCA_000455585.1_ucmb5113v1_genomic.fna    | Bacillus       | Firmicutes     |
| 1291 | GCA_001885275.1_ASM188527v1_genomic.fna   | Francisella    | Proteobacteria |
| 1292 | GCA_002214225.1_ASM221422v1_genomic.fna   | Francisella    | Proteobacteria |
| 1293 | GCA_002357215.1_ASM235721v1_genomic.fna   | Rickettsia     | Proteobacteria |
| 1294 | GCA_000493375.1_BAPNAU_WGS_genomic.fna    | Bacillus       | Firmicutes     |
| 1295 | GCA_001042405.1_ASM104240v1_genomic.fna   | Lactobacillus  | Firmicutes     |
| 1296 | GCA_001029245.1_ASM102924v1_genomic.fna   | Spiroplasma    | Tenericutes    |
| 1297 | GCA_001050475.1_ASM105047v1_genomic.fna   | Lactobacillus  | Firmicutes     |
| 1298 | GCA_001050435.1_ASM105043v1_genomic.fna   | Lactobacillus  | Firmicutes     |
| 1299 | GCA_001188855.1_ASM118885v1_genomic.fna   | Staphylococcus | Firmicutes     |
| 1300 | GCA_001262715.1_ASM126271v1_genomic.fna   | Spiroplasma    | Tenericutes    |
| 1301 | GCA_002240375.1_ASM224037v1_genomic.fna   | Lactobacillus  | Firmicutes     |
| 1302 | GCA_002005405.1_ASM200540v1_genomic.fna   | Jeotgalibaca   | Firmicutes     |
| 1303 | GCA_001267155.1_ASM126715v1_genomic.fna   | Spiroplasma    | Tenericutes    |
| 1304 | GCA_001281045.1_ASM128104v1_genomic.fna   | Spiroplasma    | Tenericutes    |
| 1305 | GCA_001936335.1_ASM193633v1_genomic.fna   | Lactobacillus  | Firmicutes     |
| 1306 | GCA_001702175.1_ASM170217v1_genomic.fna   | Lactobacillus  | Firmicutes     |
| 1307 | GCA_001702135.1_ASM170213v1_genomic.fna   | Lactobacillus  | Firmicutes     |
| 1308 | GCA_000408885.1_ASM40888v1_genomic.fna    | Bacillus       | Firmicutes     |
| 1309 | GCA_900183405.1_ASM90018340v1_genomic.fna | Lactobacillus  | Firmicutes     |
| 1310 | GCA_001922025.1_ASM192202v1_genomic.fna   | Lactobacillus  | Firmicutes     |
| 1311 | GCA_001645685.2_ASM164568v2_genomic.fna   | Bacillus       | Firmicutes     |
| 1312 | GCA_900093775.1_EVONIK_BGLY_genomic.fna   | Bacillus       | Firmicutes     |
| 1313 | GCA_001465835.2_ASM146583v2_genomic.fna   | Planococcus    | Firmicutes     |
| 1314 | GCA_001465795.2_ASM146579v2_genomic.fna   | Planococcus    | Firmicutes     |
| 1315 | GCA_001767215.1_ASM176721v1_genomic.fna   | Campylobacter  | Proteobacteria |
| 1316 | GCA_001865395.1_ASM186539v1_genomic.fna   | Campylobacter  | Proteobacteria |
| 1317 | GCA_002105695.1_ASM210569v1_genomic.fna   | Listeria       | Firmicutes     |
| 1318 | GCA_001611345.1_ASM161134v1_genomic.fna   | Staphylococcus | Firmicutes     |
| 1319 | GCA_001865435.1_ASM186543v1_genomic.fna   | Campylobacter  | Proteobacteria |
| 1320 | GCA_001865415.1_ASM186541v1_genomic.fna   | Campylobacter  | Proteobacteria |
| 1321 | GCA_002105715.1_ASM210571v1_genomic.fna   | Listeria       | Firmicutes     |
| 1322 | GCA_001611365.1_ASM161136v1_genomic.fna   | Staphylococcus | Firmicutes     |
| 1323 | GCA_002213505.1_ASM221350v1_genomic.fna   | Listeria       | Firmicutes     |

|      |                                         |                |                |
|------|-----------------------------------------|----------------|----------------|
| 1324 | GCA_002208215.1_ASM220821v1_genomic.fna | Listeria       | Firmicutes     |
| 1325 | GCA_001611385.1_ASM161138v1_genomic.fna | Staphylococcus | Firmicutes     |
| 1326 | GCA_000237265.1_ASM23726v1_genomic.fna  | Staphylococcus | Firmicutes     |
| 1327 | GCA_001277915.1_ASM127791v1_genomic.fna | Bacillus       | Firmicutes     |
| 1328 | GCA_000993765.1_ASM99376v1_genomic.fna  | Streptococcus  | Firmicutes     |
| 1329 | GCA_001865595.1_ASM186559v1_genomic.fna | Campylobacter  | Proteobacteria |
| 1330 | GCA_001611405.1_ASM161140v1_genomic.fna | Staphylococcus | Firmicutes     |
| 1331 | GCA_000299015.1_ASM29901v1_genomic.fna  | Streptococcus  | Firmicutes     |
| 1332 | GCA_001865615.1_ASM186561v1_genomic.fna | Campylobacter  | Proteobacteria |
| 1333 | GCA_001611425.1_ASM161142v1_genomic.fna | Staphylococcus | Firmicutes     |
| 1334 | GCA_000318055.1_ASM31805v1_genomic.fna  | Listeria       | Firmicutes     |
| 1335 | GCA_002078915.1_ASM207891v1_genomic.fna | Lactococcus    | Firmicutes     |
| 1336 | GCA_002213545.1_ASM221354v1_genomic.fna | Listeria       | Firmicutes     |
| 1337 | GCA_001870105.1_ASM187010v1_genomic.fna | Campylobacter  | Proteobacteria |
| 1338 | GCA_000438585.1_ASM43858v1_genomic.fna  | Listeria       | Firmicutes     |
| 1339 | GCA_000830845.1_ASM83084v1_genomic.fna  | Campylobacter  | Proteobacteria |
| 1340 | GCA_000830865.1_ASM83086v1_genomic.fna  | Campylobacter  | Proteobacteria |
| 1341 | GCA_000239235.1_ASM23923v1_genomic.fna  | Staphylococcus | Firmicutes     |
| 1342 | GCA_002213565.1_ASM221356v1_genomic.fna | Listeria       | Firmicutes     |
| 1343 | GCA_001518875.1_ASM151887v1_genomic.fna | Bacillus       | Firmicutes     |
| 1344 | GCA_001870085.1_ASM187008v1_genomic.fna | Campylobacter  | Proteobacteria |
| 1345 | GCA_002078935.1_ASM207893v1_genomic.fna | Lactococcus    | Firmicutes     |
| 1346 | GCA_001618305.1_ASM161830v1_genomic.fna | Staphylococcus | Firmicutes     |
| 1347 | GCA_002213605.1_ASM221360v1_genomic.fna | Listeria       | Firmicutes     |
| 1348 | GCA_002213585.1_ASM221358v1_genomic.fna | Listeria       | Firmicutes     |
| 1349 | GCA_000817005.1_ASM81700v1_genomic.fna  | Streptococcus  | Firmicutes     |
| 1350 | GCA_001640885.1_ASM164088v1_genomic.fna | Staphylococcus | Firmicutes     |
| 1351 | GCA_001014285.1_ASM101428v1_genomic.fna | Streptococcus  | Firmicutes     |
| 1352 | GCA_000833275.1_ASM83327v1_genomic.fna  | Bacillus       | Firmicutes     |
| 1353 | GCA_002189695.1_ASM218969v1_genomic.fna | Streptococcus  | Firmicutes     |
| 1354 | GCA_001932715.1_ASM193271v1_genomic.fna | Streptococcus  | Firmicutes     |
| 1355 | GCA_002213625.1_ASM221362v1_genomic.fna | Listeria       | Firmicutes     |
| 1356 | GCA_000493775.1_ASM49377v1_genomic.fna  | Streptococcus  | Firmicutes     |
| 1357 | GCA_001455345.1_ASM145534v1_genomic.fna | Bacillus       | Firmicutes     |



|      |                                         |                |                |
|------|-----------------------------------------|----------------|----------------|
| 1358 | GCA_002591215.1_ASM259121v1_genomic.fna | Staphylococcus | Firmicutes     |
| 1359 | GCA_001640905.1_ASM164090v1_genomic.fna | Staphylococcus | Firmicutes     |
| 1360 | GCA_001951255.1_ASM195125v1_genomic.fna | Campylobacter  | Proteobacteria |
| 1361 | GCA_001951235.1_ASM195123v1_genomic.fna | Campylobacter  | Proteobacteria |
| 1362 | GCA_000978785.2_ASM97878v2_genomic.fna  | Francisella    | Proteobacteria |
| 1363 | GCA_001640925.1_ASM164092v1_genomic.fna | Staphylococcus | Firmicutes     |
| 1364 | GCA_002079285.1_ASM207928v1_genomic.fna | Lactobacillus  | Firmicutes     |
| 1365 | GCA_000973605.1_ASM97360v1_genomic.fna  | Bacillus       | Firmicutes     |
| 1366 | GCA_002117165.1_ASM211716v1_genomic.fna | Bacillus       | Firmicutes     |
| 1367 | GCA_001641025.1_ASM164102v1_genomic.fna | Staphylococcus | Firmicutes     |
| 1368 | GCA_001951295.1_ASM195129v1_genomic.fna | Campylobacter  | Proteobacteria |
| 1369 | GCA_000286735.1_ASM28673v1_genomic.fna  | Mycoplasma     | Tenericutes    |
| 1370 | GCA_002028365.1_ASM202836v1_genomic.fna | Lactobacillus  | Firmicutes     |
| 1371 | GCA_001951275.1_ASM195127v1_genomic.fna | Campylobacter  | Proteobacteria |
| 1372 | GCA_001417865.2_ASM141786v2_genomic.fna | Serratia       | Proteobacteria |
| 1373 | GCA_001656045.1_ASM165604v1_genomic.fna | Staphylococcus | Firmicutes     |
| 1374 | GCA_002138395.1_ASM213839v1_genomic.fna | Lactobacillus  | Firmicutes     |
| 1375 | GCA_002095995.1_ASM209599v1_genomic.fna | Mycoplasma     | Tenericutes    |
| 1376 | GCA_002090315.1_ASM209031v1_genomic.fna | Mycoplasma     | Tenericutes    |
| 1377 | GCA_002024845.1_ASM202484v1_genomic.fna | Lactobacillus  | Firmicutes     |
| 1378 | GCA_001483845.1_ASM148384v1_genomic.fna | Campylobacter  | Proteobacteria |
| 1379 | GCA_002105595.1_ASM210559v1_genomic.fna | Bacillus       | Firmicutes     |
| 1380 | GCA_002213645.1_ASM221364v1_genomic.fna | Listeria       | Firmicutes     |
| 1381 | GCA_001611935.1_ASM161193v1_genomic.fna | Mycoplasma     | Tenericutes    |
| 1382 | GCA_001548175.1_ASM154817v1_genomic.fna | Bacillus       | Firmicutes     |
| 1383 | GCA_001656075.1_ASM165607v1_genomic.fna | Staphylococcus | Firmicutes     |
| 1384 | GCA_002213685.1_ASM221368v1_genomic.fna | Listeria       | Firmicutes     |
| 1385 | GCA_002009375.1_ASM200937v1_genomic.fna | Leuconostoc    | Firmicutes     |
| 1386 | GCA_002213665.1_ASM221366v1_genomic.fna | Listeria       | Firmicutes     |
| 1387 | GCA_000931425.1_ASM93142v1_genomic.fna  | Lactobacillus  | Firmicutes     |
| 1388 | GCA_001015095.1_ASM101509v1_genomic.fna | Bacillus       | Firmicutes     |
| 1389 | GCA_001011135.1_ASM101113v1_genomic.fna | Francisella    | Proteobacteria |
| 1390 | GCA_000733995.1_ASM73399v1_genomic.fna  | Mycoplasma     | Tenericutes    |
| 1391 | GCA_000875715.1_ASM87571v1_genomic.fna  | Bacillus       | Firmicutes     |

|      |                                             |                |                |
|------|---------------------------------------------|----------------|----------------|
| 1392 | GCA_001014305.1_ASM101430v1_genomic.fna     | Streptococcus  | Firmicutes     |
| 1393 | GCA_001518735.1_ASM151873v1_genomic.fna     | Enterococcus   | Firmicutes     |
| 1394 | GCA_001255215.1_S_pneumo_A66_v1_genomic.fna | Streptococcus  | Firmicutes     |
| 1395 | GCA_000508265.1_ASM50826v1_genomic.fna      | Bacillus       | Firmicutes     |
| 1396 | GCA_001951315.1_ASM195131v1_genomic.fna     | Campylobacter  | Proteobacteria |
| 1397 | GCA_001988935.1_ASM198893v1_genomic.fna     | Lactobacillus  | Firmicutes     |
| 1398 | GCA_002025005.1_ASM202500v1_genomic.fna     | Streptococcus  | Firmicutes     |
| 1399 | GCA_002688665.1_ASM268866v1_genomic.fna     | Streptococcus  | Firmicutes     |
| 1400 | GCA_001951335.1_ASM195133v1_genomic.fna     | Campylobacter  | Proteobacteria |
| 1401 | GCA_000742975.1_ASM74297v1_genomic.fna      | Enterococcus   | Firmicutes     |
| 1402 | GCA_000019545.1_ASM1954v1_genomic.fna       | Clostridium    | Firmicutes     |
| 1403 | GCA_000245495.1_ASM24549v1_genomic.fna      | Staphylococcus | Firmicutes     |
| 1404 | GCA_000363905.1_ASM36390v1_genomic.fna      | Rickettsia     | Proteobacteria |
| 1405 | GCA_000835285.1_ASM83528v1_genomic.fna      | Campylobacter  | Proteobacteria |
| 1406 | GCA_000835305.1_ASM83530v1_genomic.fna      | Campylobacter  | Proteobacteria |
| 1407 | GCA_000253135.1_ASM25313v1_genomic.fna      | Staphylococcus | Firmicutes     |
| 1408 | GCA_001554055.1_ASM155405v1_genomic.fna     | Mycoplasma     | Tenericutes    |
| 1409 | GCA_002192435.1_ASM219243v1_genomic.fna     | Lactobacillus  | Firmicutes     |
| 1410 | GCA_000438605.1_ASM43860v1_genomic.fna      | Listeria       | Firmicutes     |
| 1411 | GCA_002078955.1_ASM207895v1_genomic.fna     | Lactococcus    | Firmicutes     |
| 1412 | GCA_001635915.1_ASM163591v1_genomic.fna     | Bacillus       | Firmicutes     |
| 1413 | GCA_002151505.1_ASM215150v1_genomic.fna     | Borrelia       | Spirochaetes   |
| 1414 | GCA_000829055.1_ASM82905v1_genomic.fna      | Lactobacillus  | Firmicutes     |
| 1415 | GCA_000321395.1_ASM32139v1_genomic.fna      | Bacillus       | Firmicutes     |
| 1416 | GCA_001572745.1_ASM157274v1_genomic.fna     | Coxiella       | Proteobacteria |
| 1417 | GCA_002073735.1_ASM207373v1_genomic.fna     | Clostridioides | Firmicutes     |
| 1418 | GCA_001019635.1_ASM101963v1_genomic.fna     | Streptococcus  | Firmicutes     |
| 1419 | GCA_000967135.1_CfV_genomic.fna             | Campylobacter  | Proteobacteria |
| 1420 | GCA_001543225.1_ASM154322v1_genomic.fna     | Bacillus       | Firmicutes     |
| 1421 | GCA_001457635.1_NCTC7465_genomic.fna        | Streptococcus  | Firmicutes     |
| 1422 | GCA_001888945.1_ASM188894v1_genomic.fna     | Lactobacillus  | Firmicutes     |
| 1423 | GCA_002736265.1_ASM273626v1_genomic.fna     | Streptococcus  | Firmicutes     |
| 1424 | GCA_000438625.1_ASM43862v1_genomic.fna      | Listeria       | Firmicutes     |
| 1425 | GCA_001635955.1_ASM163595v1_genomic.fna     | Bacillus       | Firmicutes     |

|      |                                         |                |                |
|------|-----------------------------------------|----------------|----------------|
| 1426 | GCA_000831525.1_ASM83152v1_genomic.fna  | Rickettsia     | Proteobacteria |
| 1427 | GCA_002078975.1_ASM207897v1_genomic.fna | Lactococcus    | Firmicutes     |
| 1428 | GCA_001006025.1_ASM100602v1_genomic.fna | Lactobacillus  | Firmicutes     |
| 1429 | GCA_002094955.1_ASM209495v1_genomic.fna | Streptococcus  | Firmicutes     |
| 1430 | GCA_000292705.1_ASM29270v1_genomic.fna  | Bacillus       | Firmicutes     |
| 1431 | GCA_002025025.1_ASM202502v1_genomic.fna | Streptococcus  | Firmicutes     |
| 1432 | GCA_000017785.1_ASM1778v1_genomic.fna   | Francisella    | Proteobacteria |
| 1433 | GCA_001548215.1_ASM154821v1_genomic.fna | Bacillus       | Firmicutes     |
| 1434 | GCA_001618905.1_ASM161890v1_genomic.fna | Lactobacillus  | Firmicutes     |
| 1435 | GCA_000971665.1_ASM97166v1_genomic.fna  | Streptococcus  | Firmicutes     |
| 1436 | GCA_002074135.1_ASM207413v1_genomic.fna | Bacillus       | Firmicutes     |
| 1437 | GCA_000689235.1_GBCO_p1_genomic.fna     | Streptococcus  | Firmicutes     |
| 1438 | GCA_001296165.1_ASM129616v1_genomic.fna | Fusobacterium  | Fusobacteria   |
| 1439 | GCA_000583105.1_ASM58310v1_genomic.fna  | Bacillus       | Firmicutes     |
| 1440 | GCA_000231865.1_ASM23186v1_genomic.fna  | Streptococcus  | Firmicutes     |
| 1441 | GCA_002213705.1_ASM221370v1_genomic.fna | Listeria       | Firmicutes     |
| 1442 | GCA_001725965.1_ASM172596v1_genomic.fna | Staphylococcus | Firmicutes     |
| 1443 | GCA_001880265.1_ASM188026v1_genomic.fna | Staphylococcus | Firmicutes     |
| 1444 | GCA_002213745.1_ASM221374v1_genomic.fna | Listeria       | Firmicutes     |
| 1445 | GCA_002213725.1_ASM221372v1_genomic.fna | Listeria       | Firmicutes     |
| 1446 | GCA_002024325.1_ASM202432v1_genomic.fna | Campylobacter  | Proteobacteria |
| 1447 | GCA_001879545.1_ASM187954v1_genomic.fna | Staphylococcus | Firmicutes     |
| 1448 | GCA_002028305.1_ASM202830v1_genomic.fna | Campylobacter  | Proteobacteria |
| 1449 | GCA_001887075.1_ASM188707v1_genomic.fna | Staphylococcus | Firmicutes     |
| 1450 | GCA_002213765.1_ASM221376v1_genomic.fna | Listeria       | Firmicutes     |
| 1451 | GCA_001262115.1_ASM126211v1_genomic.fna | Francisella    | Proteobacteria |
| 1452 | GCA_001037985.1_ASM103798v1_genomic.fna | Bacillus       | Firmicutes     |
| 1453 | GCA_002101355.1_ASM210135v1_genomic.fna | Campylobacter  | Proteobacteria |
| 1454 | GCA_001900185.1_ASM190018v1_genomic.fna | Staphylococcus | Firmicutes     |
| 1455 | GCA_002209005.1_ASM220900v1_genomic.fna | Campylobacter  | Proteobacteria |
| 1456 | GCA_001595725.1_ASM159572v1_genomic.fna | Bacillus       | Firmicutes     |
| 1457 | GCA_002213785.1_ASM221378v1_genomic.fna | Listeria       | Firmicutes     |
| 1458 | GCA_002213825.1_ASM221382v1_genomic.fna | Listeria       | Firmicutes     |
| 1459 | GCA_002109425.1_ASM210942v1_genomic.fna | Lactobacillus  | Firmicutes     |

1460 GCA\_001956815.1\_ASM195681v1\_genomic.fna  
 1461 GCA\_002096015.1\_ASM209601v1\_genomic.fna  
 1462 GCA\_002213805.1\_ASM221380v1\_genomic.fna  
 1463 GCA\_002109405.1\_ASM210940v1\_genomic.fna  
 1464 GCA\_002209025.1\_ASM220902v1\_genomic.fna  
 1465 GCA\_002157265.1\_ASM215726v1\_genomic.fna  
 1466 GCA\_001956755.1\_ASM195675v1\_genomic.fna  
 1467 GCA\_002192235.1\_ASM219223v1\_genomic.fna  
 1468 GCA\_002209045.1\_ASM220904v1\_genomic.fna  
 1469 GCA\_001975005.1\_ASM197500v1\_genomic.fna  
 1470 GCA\_000019265.1\_ASM1926v1\_genomic.fna  
 1471 GCA\_002213845.1\_ASM221384v1\_genomic.fna  
 1472 GCA\_001598095.1\_ASM159809v1\_genomic.fna  
 1473 GCA\_002096035.1\_ASM209603v1\_genomic.fna  
 1474 GCA\_001465815.1\_ASM146581v1\_genomic.fna  
 1475 GCA\_001267475.1\_ASM126747v1\_genomic.fna  
 1476 GCA\_000438645.1\_ASM43864v1\_genomic.fna  
 1477 GCA\_000012165.1\_ASM1216v1\_genomic.fna  
 1478 GCA\_002209065.1\_ASM220906v1\_genomic.fna  
 1479 GCA\_002073695.1\_ASM207369v1\_genomic.fna  
 1480 GCA\_001896045.1\_ASM189604v1\_genomic.fna  
 1481 GCA\_002214785.1\_ASM221478v1\_genomic.fna  
 1482 GCA\_000225465.1\_ASM22546v1\_genomic.fna  
 1483 GCA\_001654475.1\_ASM165447v1\_genomic.fna  
 1484 GCA\_002213865.1\_ASM221386v1\_genomic.fna  
 1485 GCA\_001019675.1\_ASM101967v1\_genomic.fna  
 1486 GCA\_001975045.1\_ASM197504v1\_genomic.fna  
 1487 GCA\_002224325.1\_ASM222432v1\_genomic.fna  
 1488 GCA\_000296595.1\_ASM29659v1\_genomic.fna  
 1489 GCA\_002224385.1\_ASM222438v1\_genomic.fna  
 1490 GCA\_000148705.1\_ASM14870v1\_genomic.fna  
 1491 GCA\_002213905.1\_ASM221390v1\_genomic.fna  
 1492 GCA\_001721145.1\_ASM172114v1\_genomic.fna  
 1493 GCA\_002000565.1\_ASM200056v1\_genomic.fna

|                |                |
|----------------|----------------|
| Staphylococcus | Firmicutes     |
| Mycoplasma     | Tenericutes    |
| Listeria       | Firmicutes     |
| Lactobacillus  | Firmicutes     |
| Campylobacter  | Proteobacteria |
| Bacillus       | Firmicutes     |
| Staphylococcus | Firmicutes     |
| Bacillus       | Firmicutes     |
| Campylobacter  | Proteobacteria |
| Staphylococcus | Firmicutes     |
| Streptococcus  | Firmicutes     |
| Listeria       | Firmicutes     |
| Bacillus       | Firmicutes     |
| Mycoplasma     | Tenericutes    |
| Bacillus       | Firmicutes     |
| Francisella    | Proteobacteria |
| Listeria       | Firmicutes     |
| Streptococcus  | Firmicutes     |
| Campylobacter  | Proteobacteria |
| Streptococcus  | Firmicutes     |
| Streptococcus  | Firmicutes     |
| Campylobacter  | Proteobacteria |
| Buchnera       | Proteobacteria |
| Bacillus       | Firmicutes     |
| Listeria       | Firmicutes     |
| Streptococcus  | Firmicutes     |
| Staphylococcus | Firmicutes     |
| Campylobacter  | Proteobacteria |
| Staphylococcus | Firmicutes     |
| Campylobacter  | Proteobacteria |
| Campylobacter  | Proteobacteria |
| Listeria       | Firmicutes     |
| Bacillus       | Firmicutes     |
| Staphylococcus | Firmicutes     |

|      |                                         |                |                |
|------|-----------------------------------------|----------------|----------------|
| 1494 | GCA_002078995.1_ASM207899v1_genomic.fna | Lactococcus    | Firmicutes     |
| 1495 | GCA_000168595.2_ASM16859v2_genomic.fna  | Listeria       | Firmicutes     |
| 1496 | GCA_001635995.1_ASM163599v1_genomic.fna | Bacillus       | Firmicutes     |
| 1497 | GCA_002312985.1_ASM231298v1_genomic.fna | Clostridium    | Firmicutes     |
| 1498 | GCA_002213885.1_ASM221388v1_genomic.fna | Listeria       | Firmicutes     |
| 1499 | GCA_000021785.1_ASM2178v1_genomic.fna   | Bacillus       | Firmicutes     |
| 1500 | GCA_000312685.1_ASM31268v1_genomic.fna  | Lactococcus    | Firmicutes     |
| 1501 | GCA_000284535.1_ASM28453v1_genomic.fna  | Staphylococcus | Firmicutes     |
| 1502 | GCA_900086615.1_BPH0662_genomic.fna     | Staphylococcus | Firmicutes     |
| 1503 | GCA_000835345.1_ASM83534v1_genomic.fna  | Campylobacter  | Proteobacteria |
| 1504 | GCA_001986135.1_ASM198613v1_genomic.fna | Staphylococcus | Firmicutes     |
| 1505 | GCA_000011265.1_ASM1126v1_genomic.fna   | Staphylococcus | Firmicutes     |
| 1506 | GCA_000835365.1_ASM83536v1_genomic.fna  | Campylobacter  | Proteobacteria |
| 1507 | GCA_001019695.1_ASM101969v1_genomic.fna | Streptococcus  | Firmicutes     |
| 1508 | GCA_002355795.1_ASM235579v1_genomic.fna | Clostridium    | Firmicutes     |
| 1509 | GCA_001683065.1_ASM168306v1_genomic.fna | Bacillus       | Firmicutes     |
| 1510 | GCA_002213925.1_ASM221392v1_genomic.fna | Listeria       | Firmicutes     |
| 1511 | GCA_000168635.2_ASM16863v2_genomic.fna  | Listeria       | Firmicutes     |
| 1512 | GCA_001896065.1_ASM189606v1_genomic.fna | Streptococcus  | Firmicutes     |
| 1513 | GCA_002197205.1_ASM219720v1_genomic.fna | Streptococcus  | Firmicutes     |
| 1514 | GCA_002000585.1_ASM200058v1_genomic.fna | Staphylococcus | Firmicutes     |
| 1515 | GCA_000013845.2_ASM1384v2_genomic.fna   | Clostridium    | Firmicutes     |
| 1516 | GCA_002148215.1_ASM214821v1_genomic.fna | Lactococcus    | Firmicutes     |
| 1517 | GCA_000171795.2_ASM17179v2_genomic.fna  | Campylobacter  | Proteobacteria |
| 1518 | GCA_000438665.1_ASM43866v1_genomic.fna  | Listeria       | Firmicutes     |
| 1519 | GCA_000011505.1_ASM1150v1_genomic.fna   | Staphylococcus | Firmicutes     |
| 1520 | GCA_000344575.1_ASM34457v1_genomic.fna  | Lactococcus    | Firmicutes     |
| 1521 | GCA_000022505.1_ASM2250v1_genomic.fna   | Bacillus       | Firmicutes     |
| 1522 | GCA_001729565.1_ASM172956v1_genomic.fna | Francisella    | Proteobacteria |
| 1523 | GCA_001534785.1_ASM153478v1_genomic.fna | Bacillus       | Firmicutes     |
| 1524 | GCA_000013485.1_ASM1348v1_genomic.fna   | Streptococcus  | Firmicutes     |
| 1525 | GCA_000019825.1_ASM1982v1_genomic.fna   | Streptococcus  | Firmicutes     |
| 1526 | GCA_002127985.1_ASM212798v1_genomic.fna | Mycoplasma     | Tenericutes    |
| 1527 | GCA_000009605.1_ASM960v1_genomic.fna    | Buchnera       | Proteobacteria |

1528 GCA\_000011485.1\_ASM1148v1\_genomic.fna  
 1529 GCA\_002238355.1\_ASM223835v1\_genomic.fna  
 1530 GCA\_002234455.1\_ASM223445v1\_genomic.fna  
 1531 GCA\_002000605.1\_ASM200060v1\_genomic.fna  
 1532 GCA\_001618665.1\_ASM161866v1\_genomic.fna  
 1533 GCA\_001280225.1\_ASM128022v1\_genomic.fna  
 1534 GCA\_002073515.1\_ASM207351v1\_genomic.fna  
 1535 GCA\_002117245.1\_ASM211724v1\_genomic.fna  
 1536 GCA\_002128005.1\_ASM212800v1\_genomic.fna  
 1537 GCA\_000231885.1\_ASM23188v1\_genomic.fna  
 1538 GCA\_001541905.1\_ASM154190v1\_genomic.fna  
 1539 GCA\_000008445.1\_ASM844v1\_genomic.fna  
 1540 GCA\_000196055.1\_ASM19605v1\_genomic.fna  
 1541 GCA\_000162235.2\_ASM16223v2\_genomic.fna  
 1542 GCA\_000014365.1\_ASM1436v1\_genomic.fna  
 1543 GCA\_000007425.1\_ASM742v1\_genomic.fna  
 1544 GCA\_001433955.1\_ASM143395v1\_genomic.fna  
 1545 GCA\_002116955.1\_ASM211695v1\_genomic.fna  
 1546 GCA\_000730215.2\_ASM73021v2\_genomic.fna  
 1547 GCA\_002205715.1\_ASM220571v1\_genomic.fna  
 1548 GCA\_000725325.1\_ASM72532v1\_genomic.fna  
 1549 GCA\_002216755.1\_ASM221675v1\_genomic.fna  
 1550 GCA\_001640965.1\_ASM164096v1\_genomic.fna  
 1551 GCA\_001008015.1\_ASM100801v1\_genomic.fna  
 1552 GCA\_001578165.1\_ASM157816v1\_genomic.fna  
 1553 GCA\_001688685.2\_ASM168868v2\_genomic.fna  
 1554 GCA\_002197245.1\_ASM219724v1\_genomic.fna  
 1555 GCA\_001896085.1\_ASM189608v1\_genomic.fna  
 1556 GCA\_001683095.1\_ASM168309v1\_genomic.fna  
 1557 GCA\_000011845.1\_ASM1184v1\_genomic.fna  
 1558 GCA\_001596055.1\_ASM159605v1\_genomic.fna  
 1559 GCA\_000026725.1\_ASM2672v1\_genomic.fna  
 1560 GCA\_000008405.1\_ASM840v1\_genomic.fna  
 1561 GCA\_002173615.1\_ASM217361v1\_genomic.fna

|                 |                |
|-----------------|----------------|
| Prochlorococcus | Cyanobacteria  |
| Campylobacter   | Proteobacteria |
| Campylobacter   | Proteobacteria |
| Staphylococcus  | Firmicutes     |
| Bacillus        | Firmicutes     |
| Buchnera        | Proteobacteria |
| Streptococcus   | Firmicutes     |
| Lactobacillus   | Firmicutes     |
| Mycoplasma      | Tenericutes    |
| Streptococcus   | Firmicutes     |
| Bacillus        | Firmicutes     |
| Bacillus        | Firmicutes     |
| Streptococcus   | Firmicutes     |
| Fusobacterium   | Fusobacteria   |
| Streptococcus   | Firmicutes     |
| Streptococcus   | Firmicutes     |
| Fusobacterium   | Fusobacteria   |
| Lactobacillus   | Firmicutes     |
| Streptococcus   | Firmicutes     |
| Bacillus        | Firmicutes     |
| Streptococcus   | Firmicutes     |
| Bacillus        | Firmicutes     |
| Lactobacillus   | Firmicutes     |
| Streptococcus   | Firmicutes     |
| Streptococcus   | Firmicutes     |
| Bacillus        | Firmicutes     |
| Streptococcus   | Firmicutes     |
| Bacillus        | Firmicutes     |
| Streptococcus   | Firmicutes     |
| Mycoplasma      | Tenericutes    |
| Bacillus        | Firmicutes     |

|      |                                         |                |                |
|------|-----------------------------------------|----------------|----------------|
| 1562 | GCA_001729585.1_ASM172958v1_genomic.fna | Francisella    | Proteobacteria |
| 1563 | GCA_002094975.1_ASM209497v1_genomic.fna | Streptococcus  | Firmicutes     |
| 1564 | GCA_000018925.1_ASM1892v1_genomic.fna   | Francisella    | Proteobacteria |
| 1565 | GCA_001888965.1_ASM188896v1_genomic.fna | Lactobacillus  | Firmicutes     |
| 1566 | GCA_000292445.1_ASM29244v1_genomic.fna  | Mycoplasma     | Tenericutes    |
| 1567 | GCA_000590455.1_ASM59045v1_genomic.fna  | Bacillus       | Firmicutes     |
| 1568 | GCA_000159455.2_ASM15945v2_genomic.fna  | Lactobacillus  | Firmicutes     |
| 1569 | GCA_000300475.1_ASM30047v1_genomic.fna  | Bacillus       | Firmicutes     |
| 1570 | GCA_001020185.2_ASM102018v2_genomic.fna | Streptococcus  | Firmicutes     |
| 1571 | GCA_002094935.1_ASM209493v1_genomic.fna | Coxiella       | Proteobacteria |
| 1572 | GCA_000338735.1_ASM33873v1_genomic.fna  | Bacillus       | Firmicutes     |
| 1573 | GCA_002192215.1_ASM219221v1_genomic.fna | Lactobacillus  | Firmicutes     |
| 1574 | GCA_001702095.1_ASM170209v1_genomic.fna | Lactobacillus  | Firmicutes     |
| 1575 | GCA_000831545.1_ASM83154v1_genomic.fna  | Rickettsia     | Proteobacteria |
| 1576 | GCA_002356135.1_ASM235613v1_genomic.fna | Lactobacillus  | Firmicutes     |
| 1577 | GCA_000182835.1_ASM18283v1_genomic.fna  | Lactobacillus  | Firmicutes     |
| 1578 | GCA_000009325.1_ASM932v1_genomic.fna    | Francisella    | Proteobacteria |
| 1579 | GCA_000253335.1_ASM25333v1_genomic.fna  | Streptococcus  | Firmicutes     |
| 1580 | GCA_002080065.1_ASM208006v1_genomic.fna | Clostridioides | Firmicutes     |
| 1581 | GCA_000015065.1_ASM1506v1_genomic.fna   | Bacillus       | Firmicutes     |
| 1582 | GCA_001484645.1_ASM148464v1_genomic.fna | Campylobacter  | Proteobacteria |
| 1583 | GCA_000020285.1_ASM2028v1_genomic.fna   | Clostridium    | Firmicutes     |
| 1584 | GCA_002442595.1_ASM244259v1_genomic.fna | Borrelia       | Spirochaetes   |
| 1585 | GCA_001598635.1_ASM159863v1_genomic.fna | Enterococcus   | Firmicutes     |
| 1586 | GCA_000194765.1_ASM19476v1_genomic.fna  | Lactobacillus  | Firmicutes     |
| 1587 | GCA_000018745.1_ASM1874v1_genomic.fna   | Coxiella       | Proteobacteria |
| 1588 | GCA_000210435.1_ASM21043v1_genomic.fna  | Clostridioides | Firmicutes     |
| 1589 | GCA_001560895.1_ASM156089v1_genomic.fna | Streptococcus  | Firmicutes     |
| 1590 | GCA_000015085.1_ASM1508v1_genomic.fna   | Campylobacter  | Proteobacteria |
| 1591 | GCA_000367405.1_ASM36740v1_genomic.fna  | Rickettsia     | Proteobacteria |
| 1592 | GCA_000835085.1_ASM83508v1_genomic.fna  | Mycoplasma     | Tenericutes    |
| 1593 | GCA_001554075.1_ASM155407v1_genomic.fna | Mycoplasma     | Tenericutes    |
| 1594 | GCA_002078315.1_ASM207831v1_genomic.fna | Rickettsia     | Proteobacteria |
| 1595 | GCA_002355575.1_ASM235557v1_genomic.fna | Lactococcus    | Firmicutes     |

1596 GCA\_000741005.1\_ASM74100v1\_genomic.fna  
 1597 GCA\_000283775.1\_ASM28377v1\_genomic.fna  
 1598 GCA\_000165775.3\_ASM16577v3\_genomic.fna  
 1599 GCA\_000186745.1\_ASM18674v1\_genomic.fna  
 1600 GCA\_001902295.1\_ASM190229v1\_genomic.fna  
 1601 GCA\_000397165.1\_ASM39716v1\_genomic.fna  
 1602 GCA\_000063585.1\_ASM6358v1\_genomic.fna  
 1603 GCA\_000023685.1\_ASM2368v1\_genomic.fna  
 1604 GCA\_000166635.2\_ASM16663v1\_genomic.fna  
 1605 GCA\_000277165.1\_ASM27716v1\_genomic.fna  
 1606 GCA\_000172575.2\_ASM17257v2\_genomic.fna  
 1607 GCA\_000382965.1\_ASM38296v1\_genomic.fna  
 1608 GCA\_000934305.1\_ASM93430v1\_genomic.fna  
 1609 GCA\_000438685.2\_ASM43868v2\_genomic.fna  
 1610 GCA\_001880305.1\_ASM188030v1\_genomic.fna  
 1611 GCA\_900088425.1\_A12\_genomic.fna  
 1612 GCA\_001299565.1\_ASM129956v1\_genomic.fna  
 1613 GCA\_000382985.1\_ASM38298v1\_genomic.fna  
 1614 GCA\_001941885.1\_ASM194188v1\_genomic.fna  
 1615 GCA\_000438705.2\_ASM43870v2\_genomic.fna  
 1616 GCA\_001729605.1\_ASM172960v1\_genomic.fna  
 1617 GCA\_001685565.1\_ASM168556v1\_genomic.fna  
 1618 GCA\_001021955.1\_ASM102195v1\_genomic.fna  
 1619 GCA\_001683135.1\_ASM168313v1\_genomic.fna  
 1620 GCA\_001902455.1\_ASM190245v1\_genomic.fna  
 1621 GCA\_002197265.1\_ASM219726v1\_genomic.fna  
 1622 GCA\_002117285.1\_ASM211728v1\_genomic.fna  
 1623 GCA\_002238395.1\_ASM223839v1\_genomic.fna  
 1624 GCA\_000833005.1\_ASM83300v1\_genomic.fna  
 1625 GCA\_001565875.1\_ASM156587v1\_genomic.fna  
 1626 GCA\_001587115.1\_ASM158711v1\_genomic.fna  
 1627 GCA\_002128025.1\_ASM212802v1\_genomic.fna  
 1628 GCA\_002117265.1\_ASM211726v1\_genomic.fna  
 1629 GCA\_002076955.1\_ASM207695v1\_genomic.fna

|                |                |
|----------------|----------------|
| Borrelia       | Spirochaetes   |
| Rickettsia     | Proteobacteria |
| Lactobacillus  | Firmicutes     |
| Bacillus       | Firmicutes     |
| Clostridium    | Firmicutes     |
| Lactobacillus  | Firmicutes     |
| Clostridium    | Firmicutes     |
| Mycoplasma     | Tenericutes    |
| Borrelia       | Spirochaetes   |
| Rickettsia     | Proteobacteria |
| Enterococcus   | Firmicutes     |
| Staphylococcus | Firmicutes     |
| Campylobacter  | Proteobacteria |
| Listeria       | Firmicutes     |
| Bacillus       | Firmicutes     |
| Lactococcus    | Firmicutes     |
| Campylobacter  | Proteobacteria |
| Staphylococcus | Firmicutes     |
| Bacillus       | Firmicutes     |
| Listeria       | Firmicutes     |
| Francisella    | Proteobacteria |
| Bacillus       | Firmicutes     |
| Streptococcus  | Firmicutes     |
| Bacillus       | Firmicutes     |
| Streptococcus  | Firmicutes     |
| Streptococcus  | Firmicutes     |
| Lactobacillus  | Firmicutes     |
| Bacillus       | Firmicutes     |
| Bacillus       | Firmicutes     |
| Bacillus       | Firmicutes     |
| Enterococcus   | Firmicutes     |
| Mycoplasma     | Tenericutes    |
| Lactobacillus  | Firmicutes     |
| Lactobacillus  | Firmicutes     |



1630 GCA\_002237515.1\_ASM223751v1\_genomic.fna  
 1631 GCA\_001672055.1\_ASM167205v1\_genomic.fna  
 1632 GCA\_000286755.1\_ASM28675v1\_genomic.fna  
 1633 GCA\_002173555.1\_ASM217355v1\_genomic.fna  
 1634 GCA\_002128045.1\_ASM212804v1\_genomic.fna  
 1635 GCA\_001272715.1\_ASM127271v1\_genomic.fna  
 1636 GCA\_001597265.1\_ASM159726v1\_genomic.fna  
 1637 GCA\_002117185.1\_ASM211718v1\_genomic.fna  
 1638 GCA\_001865695.1\_ASM186569v1\_genomic.fna  
 1639 GCA\_001272315.2\_ASM127231v2\_genomic.fna  
 1640 GCA\_001692675.1\_ASM169267v1\_genomic.fna  
 1641 GCA\_000438725.2\_ASM43872v2\_genomic.fna  
 1642 GCA\_001941905.1\_ASM194190v1\_genomic.fna  
 1643 GCA\_000188715.1\_ASM18871v1\_genomic.fna  
 1644 GCA\_002009275.1\_ASM200927v1\_genomic.fna  
 1645 GCA\_002197285.1\_ASM219728v1\_genomic.fna  
 1646 GCA\_001639125.1\_ASM163912v1\_genomic.fna  
 1647 GCA\_001683155.1\_ASM168315v1\_genomic.fna  
 1648 GCA\_002357995.1\_ASM235799v1\_genomic.fna  
 1649 GCA\_001023495.1\_ASM102349v1\_genomic.fna  
 1650 GCA\_001941925.1\_ASM194192v1\_genomic.fna  
 1651 GCA\_000438745.2\_ASM43874v2\_genomic.fna  
 1652 GCA\_002357235.1\_ASM235723v1\_genomic.fna  
 1653 GCA\_000742855.1\_ASM74285v1\_genomic.fna  
 1654 GCA\_000336405.1\_ASM33640v1\_genomic.fna  
 1655 GCA\_000271865.1\_ASM27186v1\_genomic.fna  
 1656 GCA\_000204275.1\_ASM20427v1\_genomic.fna  
 1657 GCA\_000300045.1\_ASM30004v1\_genomic.fna  
 1658 GCA\_000383005.1\_ASM38300v1\_genomic.fna  
 1659 GCA\_002257625.1\_ASM225762v1\_genomic.fna  
 1660 GCA\_001299595.1\_ASM129959v1\_genomic.fna  
 1661 GCA\_001314285.1\_ASM131428v1\_genomic.fna  
 1662 GCA\_000412775.1\_ASM41277v1\_genomic.fna  
 1663 GCA\_002357255.1\_ASM235725v1\_genomic.fna

|                |                |
|----------------|----------------|
| Bacillus       | Firmicutes     |
| Serratia       | Proteobacteria |
| Mycoplasma     | Tenericutes    |
| Lactobacillus  | Firmicutes     |
| Mycoplasma     | Tenericutes    |
| Mycoplasma     | Tenericutes    |
| Bacillus       | Firmicutes     |
| Leuconostoc    | Firmicutes     |
| Francisella    | Proteobacteria |
| Lactobacillus  | Firmicutes     |
| Bacillus       | Firmicutes     |
| Listeria       | Firmicutes     |
| Bacillus       | Firmicutes     |
| Streptococcus  | Firmicutes     |
| Mycoplasma     | Tenericutes    |
| Streptococcus  | Firmicutes     |
| Campylobacter  | Proteobacteria |
| Bacillus       | Firmicutes     |
| Streptococcus  | Firmicutes     |
| Streptococcus  | Firmicutes     |
| Bacillus       | Firmicutes     |
| Listeria       | Firmicutes     |
| Rickettsia     | Proteobacteria |
| Bacillus       | Firmicutes     |
| Enterococcus   | Firmicutes     |
| Streptococcus  | Firmicutes     |
| Bacillus       | Firmicutes     |
| Borrelia       | Spirochaetes   |
| Staphylococcus | Firmicutes     |
| Lactobacillus  | Firmicutes     |
| Campylobacter  | Proteobacteria |
| Campylobacter  | Proteobacteria |
| Staphylococcus | Firmicutes     |
| Rickettsia     | Proteobacteria |

|      |                                         |               |                |
|------|-----------------------------------------|---------------|----------------|
| 1664 | GCA_001721165.1_ASM172116v1_genomic.fna | Bacillus      | Firmicutes     |
| 1665 | GCA_000026525.1_ASM2652v1_genomic.fna   | Lactobacillus | Firmicutes     |
| 1666 | GCA_000833215.1_ASM83321v1_genomic.fna  | Francisella   | Proteobacteria |
| 1667 | GCA_001880245.1_ASM188024v1_genomic.fna | Francisella   | Proteobacteria |
| 1668 | GCA_000026585.1_ASM2658v1_genomic.fna   | Streptococcus | Firmicutes     |
| 1669 | GCA_000583065.1_ASM58306v1_genomic.fna  | Bacillus      | Firmicutes     |
| 1670 | GCA_001039695.2_emm89-1_genomic.fna     | Streptococcus | Firmicutes     |
| 1671 | GCA_001683175.1_ASM168317v1_genomic.fna | Bacillus      | Firmicutes     |
| 1672 | GCA_000685725.1_ASM68572v1_genomic.fna  | Bacillus      | Firmicutes     |
| 1673 | GCA_002197305.1_ASM219730v1_genomic.fna | Streptococcus | Firmicutes     |
| 1674 | GCA_001679705.1_ASM167970v1_genomic.fna | Clostridium   | Firmicutes     |
| 1675 | GCA_002117305.1_ASM211730v1_genomic.fna | Lactobacillus | Firmicutes     |
| 1676 | GCA_000403625.1_ASM40362v1_genomic.fna  | Streptococcus | Firmicutes     |
| 1677 | GCA_002243325.2_ASM224332v2_genomic.fna | Bacillus      | Firmicutes     |
| 1678 | GCA_002310315.1_ASM231031v1_genomic.fna | Bacillus      | Firmicutes     |
| 1679 | GCA_001281105.1_ASM128110v1_genomic.fna | Streptococcus | Firmicutes     |
| 1680 | GCA_000025805.1_ASM2580v1_genomic.fna   | Bacillus      | Firmicutes     |
| 1681 | GCA_001604995.1_ASM160499v1_genomic.fna | Bacillus      | Firmicutes     |
| 1682 | GCA_002128065.1_ASM212806v1_genomic.fna | Mycoplasma    | Tenericutes    |
| 1683 | GCA_002442835.1_ASM244283v1_genomic.fna | Lactobacillus | Firmicutes     |
| 1684 | GCA_001717605.1_ASM171760v1_genomic.fna | Campylobacter | Proteobacteria |
| 1685 | GCA_000286775.1_ASM28677v1_genomic.fna  | Mycoplasma    | Tenericutes    |
| 1686 | GCA_002220515.1_ASM222051v1_genomic.fna | Serratia      | Proteobacteria |
| 1687 | GCA_002174235.1_ASM217423v1_genomic.fna | Lactobacillus | Firmicutes     |
| 1688 | GCA_000512955.1_ASM51295v1_genomic.fna  | Leuconostoc   | Firmicutes     |
| 1689 | GCA_000283755.1_ASM28375v1_genomic.fna  | Mycoplasma    | Tenericutes    |
| 1690 | GCA_002287905.1_ASM228790v1_genomic.fna | Lactobacillus | Firmicutes     |
| 1691 | GCA_000218855.1_ASM21885v1_genomic.fna  | Clostridium   | Firmicutes     |
| 1692 | GCA_002173655.1_ASM217365v1_genomic.fna | Lactobacillus | Firmicutes     |
| 1693 | GCA_002128085.1_ASM212808v1_genomic.fna | Mycoplasma    | Tenericutes    |
| 1694 | GCA_001272735.1_ASM127273v1_genomic.fna | Mycoplasma    | Tenericutes    |
| 1695 | GCA_002158925.1_ASM215892v1_genomic.fna | Lactobacillus | Firmicutes     |
| 1696 | GCA_000336425.1_ASM33642v1_genomic.fna  | Serratia      | Proteobacteria |
| 1697 | GCA_001676805.1_ASM167680v1_genomic.fna | Lactobacillus | Firmicutes     |

|      |                                         |                |                |
|------|-----------------------------------------|----------------|----------------|
| 1698 | GCA_001411765.2_ASM141176v2_genomic.fna | Pediococcus    | Firmicutes     |
| 1699 | GCA_000148815.2_ASM14881v1_genomic.fna  | Lactobacillus  | Firmicutes     |
| 1700 | GCA_000934625.1_ASM93462v1_genomic.fna  | Lactobacillus  | Firmicutes     |
| 1701 | GCA_002148235.1_ASM214823v1_genomic.fna | Leuconostoc    | Firmicutes     |
| 1702 | GCA_001278015.1_ASM127801v1_genomic.fna | Lactobacillus  | Firmicutes     |
| 1703 | GCA_001635875.1_ASM163587v1_genomic.fna | Enterococcus   | Firmicutes     |
| 1704 | GCA_000835145.1_ASM83514v1_genomic.fna  | Bacillus       | Firmicutes     |
| 1705 | GCA_001689055.2_ASM168905v2_genomic.fna | Enterococcus   | Firmicutes     |
| 1706 | GCA_000506785.3_ASM50678v3_genomic.fna  | Clostridium    | Firmicutes     |
| 1707 | GCA_000270525.1_ASM27052v1_genomic.fna  | Mycoplasma     | Tenericutes    |
| 1708 | GCA_000816365.1_ASM81636v1_genomic.fna  | Campylobacter  | Proteobacteria |
| 1709 | GCA_000494775.1_ASM49477v1_genomic.fna  | Campylobacter  | Proteobacteria |
| 1710 | GCA_002504365.1_ASM250436v1_genomic.fna | Mesoplasma     | Tenericutes    |
| 1711 | GCA_000025385.1_ASM2538v1_genomic.fna   | Mycoplasma     | Tenericutes    |
| 1712 | GCA_000217835.1_ASM21783v1_genomic.fna  | Bacillus       | Firmicutes     |
| 1713 | GCA_001558275.1_ASM155827v1_genomic.fna | Staphylococcus | Firmicutes     |
| 1714 | GCA_000763475.1_ASM76347v1_genomic.fna  | Listeria       | Firmicutes     |
| 1715 | GCA_002250115.1_ASM225011v1_genomic.fna | Bacillus       | Firmicutes     |
| 1716 | GCA_000758365.1_ASM75836v1_genomic.fna  | Lactobacillus  | Firmicutes     |
| 1717 | GCA_000020345.1_ASM2034v1_genomic.fna   | Clostridium    | Firmicutes     |
| 1718 | GCA_002220115.1_ASM222011v1_genomic.fna | Streptococcus  | Firmicutes     |
| 1719 | GCA_001598075.1_ASM159807v1_genomic.fna | Lysinibacillus | Firmicutes     |
| 1720 | GCA_000284355.1_ASM28435v1_genomic.fna  | Arcobacter     | Proteobacteria |
| 1721 | GCA_002250035.1_ASM225003v1_genomic.fna | Lactobacillus  | Firmicutes     |
| 1722 | GCA_000277305.1_ASM27730v1_genomic.fna  | Rickettsia     | Proteobacteria |
| 1723 | GCA_000204985.1_ASM20498v1_genomic.fna  | Lactobacillus  | Firmicutes     |
| 1724 | GCA_001646605.1_ASM164660v1_genomic.fna | Clostridium    | Firmicutes     |
| 1725 | GCA_002197325.1_ASM219732v1_genomic.fna | Streptococcus  | Firmicutes     |
| 1726 | GCA_001660525.1_ASM166052v1_genomic.fna | Bacillus       | Firmicutes     |
| 1727 | GCA_002025105.1_ASM202510v1_genomic.fna | Bacillus       | Firmicutes     |
| 1728 | GCA_000513595.1_ASM51359v1_genomic.fna  | Listeria       | Firmicutes     |
| 1729 | GCA_002000005.1_ASM200000v1_genomic.fna | Bacillus       | Firmicutes     |
| 1730 | GCA_000418345.1_ASM41834v1_genomic.fna  | Staphylococcus | Firmicutes     |
| 1731 | GCA_001683195.1_ASM168319v1_genomic.fna | Bacillus       | Firmicutes     |

1732 GCA\_001051095.1\_ASM105109v1\_genomic.fna  
 1733 GCA\_001412295.1\_ASM141229v1\_genomic.fna  
 1734 GCA\_001457695.1\_NCTC11351\_genomic.fna  
 1735 GCA\_000452385.2\_ASM45238v2\_genomic.fna  
 1736 GCA\_002214705.1\_ASM221470v1\_genomic.fna  
 1737 GCA\_000513615.1\_ASM51361v1\_genomic.fna  
 1738 GCA\_001697265.1\_ASM169726v1\_genomic.fna  
 1739 GCA\_002109345.1\_ASM210934v1\_genomic.fna  
 1740 GCA\_002119445.1\_ASM211944v1\_genomic.fna  
 1741 GCA\_002234355.1\_ASM223435v1\_genomic.fna  
 1742 GCA\_001267805.1\_ASM126780v1\_genomic.fna  
 1743 GCA\_001602215.1\_ASM160221v1\_genomic.fna  
 1744 GCA\_001683215.1\_ASM168321v1\_genomic.fna  
 1745 GCA\_001554155.1\_ASM155415v1\_genomic.fna  
 1746 GCA\_002197365.1\_ASM219736v1\_genomic.fna  
 1747 GCA\_001950995.1\_ASM195099v1\_genomic.fna  
 1748 GCA\_001746265.2\_ASM174626v2\_genomic.fna  
 1749 GCA\_000344745.1\_ASM34474v1\_genomic.fna  
 1750 GCA\_002205775.2\_ASM220577v2\_genomic.fna  
 1751 GCA\_002128125.1\_ASM212812v1\_genomic.fna  
 1752 GCA\_000306745.1\_ASM30674v1\_genomic.fna  
 1753 GCA\_001686885.1\_ASM168688v1\_genomic.fna  
 1754 GCA\_001888985.1\_ASM188898v1\_genomic.fna  
 1755 GCA\_002128105.1\_ASM212810v1\_genomic.fna  
 1756 GCA\_002174195.1\_ASM217419v1\_genomic.fna  
 1757 GCA\_000023305.1\_ASM2330v1\_genomic.fna  
 1758 GCA\_002327165.1\_ASM232716v1\_genomic.fna  
 1759 GCA\_000231905.1\_ASM23190v1\_genomic.fna  
 1760 GCA\_002197385.1\_ASM219738v1\_genomic.fna  
 1761 GCA\_001700735.1\_ASM170073v1\_genomic.fna  
 1762 GCA\_001703495.1\_ASM170349v1\_genomic.fna  
 1763 GCA\_001280285.1\_ASM128028v1\_genomic.fna  
 1764 GCA\_002173675.1\_ASM217367v1\_genomic.fna  
 1765 GCA\_002173755.1\_ASM217375v1\_genomic.fna

|                |                |
|----------------|----------------|
| Streptococcus  | Firmicutes     |
| Campylobacter  | Proteobacteria |
| Campylobacter  | Proteobacteria |
| Staphylococcus | Firmicutes     |
| Bacillus       | Firmicutes     |
| Listeria       | Firmicutes     |
| Bacillus       | Firmicutes     |
| Coxiella       | Proteobacteria |
| Bacillus       | Firmicutes     |
| Clostridioides | Firmicutes     |
| Streptococcus  | Firmicutes     |
| Rickettsia     | Proteobacteria |
| Bacillus       | Firmicutes     |
| Mycoplasma     | Tenericutes    |
| Streptococcus  | Firmicutes     |
| Rickettsia     | Proteobacteria |
| Lactobacillus  | Firmicutes     |
| Bacillus       | Firmicutes     |
| Lactobacillus  | Firmicutes     |
| Mycoplasma     | Tenericutes    |
| Bacillus       | Firmicutes     |
| Campylobacter  | Proteobacteria |
| Lactobacillus  | Firmicutes     |
| Mycoplasma     | Tenericutes    |
| Lactobacillus  | Firmicutes     |
| Francisella    | Proteobacteria |
| Bacillus       | Firmicutes     |
| Streptococcus  | Firmicutes     |
| Streptococcus  | Firmicutes     |
| Bacillus       | Firmicutes     |
| Bacillus       | Firmicutes     |
| Streptococcus  | Firmicutes     |
| Bacillus       | Firmicutes     |
| Bacillus       | Firmicutes     |

1766 GCA\_000513635.1\_ASM51363v1\_genomic.fna  
 1767 GCA\_002214725.1\_ASM221472v1\_genomic.fna  
 1768 GCA\_000462955.1\_ASM46295v1\_genomic.fna  
 1769 GCA\_001506185.1\_ASM150618v1\_genomic.fna  
 1770 GCA\_002243705.1\_ASM224370v1\_genomic.fna  
 1771 GCA\_000742655.1\_ASM74265v1\_genomic.fna  
 1772 GCA\_001683235.1\_ASM168323v1\_genomic.fna  
 1773 GCA\_001267845.1\_ASM126784v1\_genomic.fna  
 1774 GCA\_000730255.1\_ASM73025v1\_genomic.fna  
 1775 GCA\_001457555.1\_NCTC10562\_genomic.fna  
 1776 GCA\_000019985.1\_ASM1998v1\_genomic.fna  
 1777 GCA\_000013505.1\_ASM1350v1\_genomic.fna  
 1778 GCA\_000015705.1\_ASM1570v1\_genomic.fna  
 1779 GCA\_000168695.2\_ASM16869v2\_genomic.fna  
 1780 GCA\_000468955.1\_ASM46895v1\_genomic.fna  
 1781 GCA\_002591175.1\_ASM259117v1\_genomic.fna  
 1782 GCA\_000155515.2\_ASM15551v2\_genomic.fna  
 1783 GCA\_000211295.1\_ASM21129v1\_genomic.fna  
 1784 GCA\_000463385.1\_ASM46338v1\_genomic.fna  
 1785 GCA\_002250075.1\_ASM225007v1\_genomic.fna  
 1786 GCA\_900016785.1\_BTsPazieg1.0\_genomic.fna  
 1787 GCA\_001506205.1\_ASM150620v1\_genomic.fna  
 1788 GCA\_000463055.1\_ASM46305v1\_genomic.fna  
 1789 GCA\_002214765.1\_ASM221476v1\_genomic.fna  
 1790 GCA\_000015685.1\_ASM1568v1\_genomic.fna  
 1791 GCA\_000513655.1\_ASM51365v1\_genomic.fna  
 1792 GCA\_000302555.4\_ASM30255v4\_genomic.fna  
 1793 GCA\_002184245.1\_ASM218424v1\_genomic.fna  
 1794 GCA\_000012045.1\_ASM1204v1\_genomic.fna  
 1795 GCA\_001704095.1\_ASM170409v1\_genomic.fna  
 1796 GCA\_002173575.1\_ASM217357v1\_genomic.fna  
 1797 GCA\_002386345.1\_ASM238634v1\_genomic.fna  
 1798 GCA\_000830075.1\_ASM83007v1\_genomic.fna  
 1799 GCA\_001602155.1\_ASM160215v1\_genomic.fna

|                    |                |
|--------------------|----------------|
| Listeria           | Firmicutes     |
| Bacillus           | Firmicutes     |
| Staphylococcus     | Firmicutes     |
| Campylobacter      | Proteobacteria |
| Anoxybacillus      | Firmicutes     |
| Bacillus           | Firmicutes     |
| Bacillus           | Firmicutes     |
| Streptococcus      | Firmicutes     |
| Streptococcus      | Firmicutes     |
| Fusobacterium      | Fusobacteria   |
| Streptococcus      | Firmicutes     |
| Streptococcus      | Firmicutes     |
| Prochlorococcus    | Cyanobacteria  |
| Listeria           | Firmicutes     |
| Lactococcus        | Firmicutes     |
| Staphylococcus     | Firmicutes     |
| Lactobacillus      | Firmicutes     |
| Mycoplasma         | Tenericutes    |
| Streptococcus      | Firmicutes     |
| Thermoanaerobacter | Firmicutes     |
| Buchnera           | Proteobacteria |
| Campylobacter      | Proteobacteria |
| Staphylococcus     | Firmicutes     |
| Bacillus           | Firmicutes     |
| Prochlorococcus    | Cyanobacteria  |
| Listeria           | Firmicutes     |
| Campylobacter      | Proteobacteria |
| Bacillus           | Firmicutes     |
| Staphylococcus     | Firmicutes     |
| Bacillus           | Firmicutes     |
| Pediococcus        | Firmicutes     |
| Streptococcus      | Firmicutes     |
| Bacillus           | Firmicutes     |
| Erysipelothrix     | Firmicutes     |

|      |                                                                             |                 |                |
|------|-----------------------------------------------------------------------------|-----------------|----------------|
| 1800 | GCA_000143605.1_ASM14360v1_genomic.fna                                      | Bacillus        | Firmicutes     |
| 1801 | GCA_001535565.1_ASM153556v1_genomic.fna                                     | Streptococcus   | Firmicutes     |
| 1802 | GCA_000011525.1_ASM1152v1_genomic.fna                                       | Staphylococcus  | Firmicutes     |
| 1803 | GCA_001683255.1_ASM168325v1_genomic.fna                                     | Bacillus        | Firmicutes     |
| 1804 | GCA_002197425.1_ASM219742v1_genomic.fna                                     | Streptococcus   | Firmicutes     |
| 1805 | GCA_000184205.1_ASM18420v1_genomic.fna                                      | Campylobacter   | Proteobacteria |
| 1806 | GCA_000015965.1_ASM1596v1_genomic.fna                                       | Prochlorococcus | Cyanobacteria  |
| 1807 | GCA_001648115.1_ASM164811v1_genomic.fna                                     | Buchnera        | Proteobacteria |
| 1808 | GCA_000478925.1_ASM47892v1_genomic.fna                                      | Streptococcus   | Firmicutes     |
| 1809 | GCA_001558775.1_ASM155877v1_genomic.fna                                     | Staphylococcus  | Firmicutes     |
| 1810 | GCA_000463445.1_ASM46344v1_genomic.fna                                      | Streptococcus   | Firmicutes     |
| 1811 | GCA_002706375.1_ASM270637v1_genomic.fna                                     | Lactobacillus   | Firmicutes     |
| 1812 | GCA_900186885.1_48903_D01_genomic.fna                                       | Veillonella     | Firmicutes     |
| 1813 | GCA_000239195.1_ASM23919v1_genomic.fna                                      | Bacillus        | Firmicutes     |
| 1814 | GCA_000478255.2_ASM47825v2_genomic.fna                                      | Lactococcus     | Firmicutes     |
| 1815 | GCA_002128145.1_ASM212814v1_genomic.fna                                     | Mycoplasma      | Tenericutes    |
| 1816 | GCA_002220175.1_ASM222017v1_genomic.fna                                     | Lactobacillus   | Firmicutes     |
| 1817 | GCA_000026665.1_ASM2666v1_genomic.fna                                       | Streptococcus   | Firmicutes     |
| 1818 | GCA_002211605.1_ASM221160v1_genomic.fna                                     | Fusobacterium   | Fusobacteria   |
| 1819 | GCA_000782855.1_ASM78285v1_genomic.fna                                      | Streptococcus   | Firmicutes     |
| 1820 | GCA_000742895.1_ASM74289v1_genomic.fna                                      | Bacillus        | Firmicutes     |
| 1821 | GCA_000947915.1_ASM94791v1_genomic.fna                                      | Mycoplasma      | Tenericutes    |
| 1822 | GCA_000296575.1_ASM29657v1_genomic.fna                                      | Brachyspira     | Spirochaetes   |
| 1823 | GCA_000203195.1_ASM20319v1_genomic.fna                                      | Streptococcus   | Firmicutes     |
| 1824 | GCA_000013525.1_ASM1352v1_genomic.fna                                       | Streptococcus   | Firmicutes     |
| 1825 | GCA_002174255.1_ASM217425v1_genomic.fna                                     | Bacillus        | Firmicutes     |
| 1826 | GCA_001514435.1_ASM151443v1_genomic.fna                                     | Streptococcus   | Firmicutes     |
| 1827 | GCA_001704975.1_ASM170497v1_genomic.fna                                     | Bacillus        | Firmicutes     |
| 1828 | GCA_001682335.1_ASM168233v1_genomic.fna                                     | Staphylococcus  | Firmicutes     |
| 1829 | GCA_001536305.1_Leuconostoc_gelidum_subsp._gasicomitatum_KG16-1_genomic.fna | Leuconostoc     | Firmicutes     |
| 1830 | GCA_002706705.1_ASM270670v1_genomic.fna                                     | Lactobacillus   | Firmicutes     |
| 1831 | GCA_001951075.1_ASM195107v1_genomic.fna                                     | Weissella       | Firmicutes     |
| 1832 | GCA_000231925.1_ASM23192v1_genomic.fna                                      | Streptococcus   | Firmicutes     |
| 1833 | GCA_002278015.1_ASM227801v1_genomic.fna                                     | Enterococcus    | Firmicutes     |

|      |                                                        |                 |                |
|------|--------------------------------------------------------|-----------------|----------------|
| 1834 | GCA_002243535.1_ASM224353v1_genomic.fna                | Tetragenococcus | Firmicutes     |
| 1835 | GCA_002078335.1_ASM207833v1_genomic.fna                | Rickettsia      | Proteobacteria |
| 1836 | GCA_000338755.1_ASM33875v1_genomic.fna                 | Bacillus        | Firmicutes     |
| 1837 | GCA_001702235.1_ASM170223v1_genomic.fna                | Pediococcus     | Firmicutes     |
| 1838 | GCA_002357115.1_ASM235711v1_genomic.fna                | Rickettsia      | Proteobacteria |
| 1839 | GCA_000953575.1_Staphylococcus_xylosus_C2a_genomic.fna | Staphylococcus  | Firmicutes     |
| 1840 | GCA_001611075.1_ASM161107v1_genomic.fna                | Pediococcus     | Firmicutes     |
| 1841 | GCA_001698165.1_ASM169816v1_genomic.fna                | Lactobacillus   | Firmicutes     |
| 1842 | GCA_002277935.1_ASM227793v1_genomic.fna                | Enterococcus    | Firmicutes     |
| 1843 | GCA_002220775.1_ASM222077v1_genomic.fna                | Campylobacter   | Proteobacteria |
| 1844 | GCA_001042525.2_ASM104252v2_genomic.fna                | Francisella     | Proteobacteria |
| 1845 | GCA_002128165.1_ASM212816v1_genomic.fna                | Mycoplasma      | Tenericutes    |
| 1846 | GCA_001720505.1_ASM172050v1_genomic.fna                | Bacillus        | Firmicutes     |
| 1847 | GCA_002192515.1_ASM219251v1_genomic.fna                | Bacillus        | Firmicutes     |
| 1848 | GCA_002220815.1_ASM222081v1_genomic.fna                | Lactobacillus   | Firmicutes     |
| 1849 | GCA_001683275.1_ASM168327v1_genomic.fna                | Bacillus        | Firmicutes     |
| 1850 | GCA_001547715.1_ASM154771v1_genomic.fna                | Streptococcus   | Firmicutes     |
| 1851 | GCA_002214425.1_ASM221442v1_genomic.fna                | Streptococcus   | Firmicutes     |
| 1852 | GCA_000470865.1_ASM47086v1_genomic.fna                 | Staphylococcus  | Firmicutes     |
| 1853 | GCA_001506245.1_ASM150624v1_genomic.fna                | Campylobacter   | Proteobacteria |
| 1854 | GCA_002216125.1_ASM221612v1_genomic.fna                | Bacillus        | Firmicutes     |
| 1855 | GCA_000513675.1_ASM51367v1_genomic.fna                 | Listeria        | Firmicutes     |
| 1856 | GCA_002215175.1_ASM221517v1_genomic.fna                | Bacillus        | Firmicutes     |
| 1857 | GCA_001506225.1_ASM150622v1_genomic.fna                | Campylobacter   | Proteobacteria |
| 1858 | GCA_000470845.1_ASM47084v1_genomic.fna                 | Staphylococcus  | Firmicutes     |
| 1859 | GCA_001908415.1_ASM190841v1_genomic.fna                | Lactobacillus   | Firmicutes     |
| 1860 | GCA_002289205.1_ASM228920v1_genomic.fna                | Streptococcus   | Firmicutes     |
| 1861 | GCA_000349795.1_ASM34979v1_genomic.fna                 | Bacillus        | Firmicutes     |
| 1862 | GCA_000513695.1_ASM51369v1_genomic.fna                 | Listeria        | Firmicutes     |
| 1863 | GCA_000168775.2_ASM16877v2_genomic.fna                 | Francisella     | Proteobacteria |
| 1864 | GCA_001547835.1_ASM154783v1_genomic.fna                | Streptococcus   | Firmicutes     |
| 1865 | GCA_001683295.1_ASM168329v1_genomic.fna                | Bacillus        | Firmicutes     |
| 1866 | GCA_002208905.1_ASM220890v1_genomic.fna                | Staphylococcus  | Firmicutes     |
| 1867 | GCA_001878735.1_ASM187873v1_genomic.fna                | Enterococcus    | Firmicutes     |

1868 GCA\_002286275.1\_ASM228627v1\_genomic.fna  
 1869 GCA\_001951015.1\_ASM195101v1\_genomic.fna  
 1870 GCA\_002222555.1\_ASM222255v1\_genomic.fna  
 1871 GCA\_001564435.1\_ASM156443v1\_genomic.fna  
 1872 GCA\_001746575.1\_ASM174657v1\_genomic.fna  
 1873 GCA\_000022765.1\_ASM2276v1\_genomic.fna  
 1874 GCA\_002128185.1\_ASM212818v1\_genomic.fna  
 1875 GCA\_002243685.1\_ASM224368v1\_genomic.fna  
 1876 GCA\_001747445.1\_ASM174744v1\_genomic.fna  
 1877 GCA\_000973485.1\_ASM97348v1\_genomic.fna  
 1878 GCA\_002209265.1\_ASM220926v1\_genomic.fna  
 1879 GCA\_001720945.1\_ASM172094v1\_genomic.fna  
 1880 GCA\_002290185.1\_ASM229018v1\_genomic.fna  
 1881 GCA\_002128205.1\_ASM212820v1\_genomic.fna  
 1882 GCA\_002286235.1\_ASM228623v1\_genomic.fna  
 1883 GCA\_000286795.1\_ASM28679v1\_genomic.fna  
 1884 GCA\_002220535.1\_ASM222053v1\_genomic.fna  
 1885 GCA\_001683315.1\_ASM168331v1\_genomic.fna  
 1886 GCA\_000261045.2\_ASM26104v2\_genomic.fna  
 1887 GCA\_001272755.1\_ASM127275v1\_genomic.fna  
 1888 GCA\_900078265.1\_SA111\_genomic.fna  
 1889 GCA\_001296095.1\_ASM129609v1\_genomic.fna  
 1890 GCA\_001936375.1\_ASM193637v1\_genomic.fna  
 1891 GCA\_002370395.1\_ASM237039v1\_genomic.fna  
 1892 GCA\_001559175.1\_ASM155917v1\_genomic.fna  
 1893 GCA\_001506285.1\_ASM150628v1\_genomic.fna  
 1894 GCA\_002224345.1\_ASM222434v1\_genomic.fna  
 1895 GCA\_000568935.1\_ASM56893v1\_genomic.fna  
 1896 GCA\_001938685.1\_ASM193868v1\_genomic.fna  
 1897 GCA\_001865455.1\_ASM186545v1\_genomic.fna  
 1898 GCA\_000568475.1\_ASM56847v1\_genomic.fna  
 1899 GCA\_002220285.1\_ASM222028v1\_genomic.fna  
 1900 GCA\_001506265.1\_ASM150626v1\_genomic.fna  
 1901 GCA\_000485885.1\_ASM48588v1\_genomic.fna

|                |                |
|----------------|----------------|
| Lactobacillus  | Firmicutes     |
| Rickettsia     | Proteobacteria |
| Bacillus       | Firmicutes     |
| Mycoplasma     | Tenericutes    |
| Bacillus       | Firmicutes     |
| Clostridium    | Firmicutes     |
| Mycoplasma     | Tenericutes    |
| Bacillus       | Firmicutes     |
| Bacillus       | Firmicutes     |
| Bacillus       | Firmicutes     |
| Staphylococcus | Firmicutes     |
| Enterococcus   | Firmicutes     |
| Lactobacillus  | Firmicutes     |
| Mycoplasma     | Tenericutes    |
| Lactobacillus  | Firmicutes     |
| Mycoplasma     | Tenericutes    |
| Serratia       | Proteobacteria |
| Staphylococcus | Firmicutes     |
| Serratia       | Proteobacteria |
| Mycoplasma     | Tenericutes    |
| Streptococcus  | Firmicutes     |
| Lactobacillus  | Firmicutes     |
| Bacillus       | Firmicutes     |
| Leuconostoc    | Firmicutes     |
| Streptococcus  | Firmicutes     |
| Campylobacter  | Proteobacteria |
| Bacillus       | Firmicutes     |
| Listeria       | Firmicutes     |
| Bacillus       | Firmicutes     |
| Campylobacter  | Proteobacteria |
| Listeria       | Firmicutes     |
| Bacillus       | Firmicutes     |
| Campylobacter  | Proteobacteria |
| Staphylococcus | Firmicutes     |



1902 GCA\_000648525.1\_ASM64852v1\_genomic.fna  
 1903 GCA\_000568455.1\_ASM56845v1\_genomic.fna  
 1904 GCA\_000973585.1\_ASM97358v1\_genomic.fna  
 1905 GCA\_002003325.1\_ASM200332v1\_genomic.fna  
 1906 GCA\_000750515.1\_ASM75051v1\_genomic.fna  
 1907 GCA\_002442515.1\_ASM244251v1\_genomic.fna  
 1908 GCA\_001559135.1\_ASM155913v1\_genomic.fna  
 1909 GCA\_002357275.1\_ASM235727v1\_genomic.fna  
 1910 GCA\_001620285.1\_ASM162028v1\_genomic.fna  
 1911 GCA\_000769555.1\_ASM76955v1\_genomic.fna  
 1912 GCA\_001990245.1\_ASM199024v1\_genomic.fna  
 1913 GCA\_900155855.1\_BM110\_genomic.fna  
 1914 GCA\_001865475.1\_ASM186547v1\_genomic.fna  
 1915 GCA\_001455145.1\_ASM145514v1\_genomic.fna  
 1916 GCA\_000284395.1\_ASM28439v1\_genomic.fna  
 1917 GCA\_002327205.1\_ASM232720v1\_genomic.fna  
 1918 GCA\_002357295.1\_ASM235729v1\_genomic.fna  
 1919 GCA\_001808235.1\_ASM180823v1\_genomic.fna  
 1920 GCA\_002128235.1\_ASM212823v1\_genomic.fna  
 1921 GCA\_002576835.1\_ASM257683v1\_genomic.fna  
 1922 GCA\_000648555.1\_ASM64855v1\_genomic.fna  
 1923 GCA\_001272775.1\_ASM127277v1\_genomic.fna  
 1924 GCA\_002068155.1\_ASM206815v1\_genomic.fna  
 1925 GCA\_001543245.1\_ASM154324v1\_genomic.fna  
 1926 GCA\_001702195.1\_ASM170219v1\_genomic.fna  
 1927 GCA\_001543145.1\_ASM154314v1\_genomic.fna  
 1928 GCA\_001188895.1\_ASM118889v1\_genomic.fna  
 1929 GCA\_001534665.1\_ASM153466v1\_genomic.fna  
 1930 GCA\_001643995.1\_ASM164399v1\_genomic.fna  
 1931 GCA\_000286815.1\_ASM28681v1\_genomic.fna  
 1932 GCA\_002220555.1\_ASM222055v1\_genomic.fna  
 1933 GCA\_002370415.1\_ASM237041v1\_genomic.fna  
 1934 GCA\_001302645.1\_ASM130264v1\_genomic.fna  
 1935 GCA\_001721065.1\_ASM172106v1\_genomic.fna

|                |                |
|----------------|----------------|
| Streptococcus  | Firmicutes     |
| Staphylococcus | Firmicutes     |
| Bacillus       | Firmicutes     |
| Clostridium    | Firmicutes     |
| Weissella      | Firmicutes     |
| Brochothrix    | Firmicutes     |
| Serratia       | Proteobacteria |
| Rickettsia     | Proteobacteria |
| Streptococcus  | Firmicutes     |
| Bacillus       | Firmicutes     |
| Bacillus       | Firmicutes     |
| Streptococcus  | Firmicutes     |
| Campylobacter  | Proteobacteria |
| Fusobacterium  | Fusobacteria   |
| Bacillus       | Firmicutes     |
| Clostridium    | Firmicutes     |
| Rickettsia     | Proteobacteria |
| Bacillus       | Firmicutes     |
| Mycoplasma     | Tenericutes    |
| Lactobacillus  | Firmicutes     |
| Streptococcus  | Firmicutes     |
| Mycoplasma     | Tenericutes    |
| Bacillus       | Firmicutes     |
| Aerococcus     | Firmicutes     |
| Lactobacillus  | Firmicutes     |
| Aerococcus     | Firmicutes     |
| Staphylococcus | Firmicutes     |
| Arsenophonus   | Proteobacteria |
| Campylobacter  | Proteobacteria |
| Mycoplasma     | Tenericutes    |
| Serratia       | Proteobacteria |
| Leuconostoc    | Firmicutes     |
| Lactobacillus  | Firmicutes     |
| Enterococcus   | Firmicutes     |

1936 GCA\_001483885.1\_ASM148388v1\_genomic.fna  
 1937 GCA\_001663735.1\_ASM166373v1\_genomic.fna  
 1938 GCA\_002021985.1\_ASM202198v1\_genomic.fna  
 1939 GCA\_002021965.1\_ASM202196v1\_genomic.fna  
 1940 GCA\_001663715.1\_ASM166371v1\_genomic.fna  
 1941 GCA\_002287945.1\_ASM228794v1\_genomic.fna  
 1942 GCA\_002003365.1\_ASM200336v1\_genomic.fna  
 1943 GCA\_900187015.1\_50465\_F01\_genomic.fna  
 1944 GCA\_000319475.1\_ASM31947v1\_genomic.fna  
 1945 GCA\_001188915.1\_ASM118891v1\_genomic.fna  
 1946 GCA\_002393225.1\_ASM239322v1\_genomic.fna  
 1947 GCA\_001886675.1\_ASM188667v1\_genomic.fna  
 1948 GCA\_000092345.1\_ASM9234v1\_genomic.fna  
 1949 GCA\_001938705.1\_ASM193870v1\_genomic.fna  
 1950 GCA\_001999905.1\_ASM199990v1\_genomic.fna  
 1951 GCA\_001634285.1\_ASM163428v1\_genomic.fna  
 1952 GCA\_001042545.2\_ASM104254v2\_genomic.fna  
 1953 GCA\_000438825.1\_ASM43882v1\_genomic.fna  
 1954 GCA\_001617605.1\_ASM161760v1\_genomic.fna  
 1955 GCA\_001642085.1\_ASM164208v1\_genomic.fna  
 1956 GCA\_001663675.1\_ASM166367v1\_genomic.fna  
 1957 GCA\_001953135.1\_ASM195313v1\_genomic.fna  
 1958 GCA\_000195535.1\_ASM19553v1\_genomic.fna  
 1959 GCA\_000497485.1\_ASM49748v1\_genomic.fna  
 1960 GCA\_001908475.1\_ASM190847v1\_genomic.fna  
 1961 GCA\_001663795.1\_ASM166379v1\_genomic.fna  
 1962 GCA\_000341665.1\_ASM34166v1\_genomic.fna  
 1963 GCA\_000830095.1\_ASM83009v1\_genomic.fna  
 1964 GCA\_002236895.1\_ASM223689v1\_genomic.fna  
 1965 GCA\_000233575.1\_ASM23357v1\_genomic.fna  
 1966 GCA\_000807175.1\_ASM80717v1\_genomic.fna  
 1967 GCA\_002078255.1\_ASM207825v1\_genomic.fna  
 1968 GCA\_002357135.1\_ASM235713v1\_genomic.fna  
 1969 GCA\_002220795.1\_ASM222079v1\_genomic.fna

|                  |                |
|------------------|----------------|
| Bacillus         | Firmicutes     |
| Lactobacillus    | Firmicutes     |
| Campylobacter    | Proteobacteria |
| Campylobacter    | Proteobacteria |
| Lactobacillus    | Firmicutes     |
| Lactobacillus    | Firmicutes     |
| Clostridium      | Firmicutes     |
| Serratia         | Proteobacteria |
| Bacillus         | Firmicutes     |
| Staphylococcus   | Firmicutes     |
| Bacillus         | Firmicutes     |
| Enterococcus     | Firmicutes     |
| Clostridium      | Firmicutes     |
| Bacillus         | Firmicutes     |
| Planococcus      | Firmicutes     |
| Anoxybacillus    | Firmicutes     |
| Francisella      | Proteobacteria |
| Serratia         | Proteobacteria |
| Rummeliibacillus | Firmicutes     |
| Streptococcus    | Firmicutes     |
| Lactobacillus    | Firmicutes     |
| Lactobacillus    | Firmicutes     |
| Francisella      | Proteobacteria |
| Bacillus         | Firmicutes     |
| Bacillus         | Firmicutes     |
| Streptococcus    | Firmicutes     |
| Bacillus         | Firmicutes     |
| Bacillus         | Firmicutes     |
| Bacillus         | Firmicutes     |
| Streptococcus    | Firmicutes     |
| Clostridium      | Firmicutes     |
| Staphylococcus   | Firmicutes     |
| Rickettsia       | Proteobacteria |
| Campylobacter    | Proteobacteria |

1970 GCA\_000831105.1\_ASM83110v1\_genomic.fna  
 1971 GCA\_002211625.1\_ASM221162v1\_genomic.fna  
 1972 GCA\_000013545.1\_ASM1354v1\_genomic.fna  
 1973 GCA\_000146975.1\_ASM14697v1\_genomic.fna  
 1974 GCA\_001723545.1\_ASM172354v1\_genomic.fna  
 1975 GCA\_001611115.1\_ASM161111v1\_genomic.fna  
 1976 GCA\_001700895.1\_ASM170089v1\_genomic.fna  
 1977 GCA\_000013465.1\_ASM1346v1\_genomic.fna  
 1978 GCA\_001951095.1\_ASM195109v1\_genomic.fna  
 1979 GCA\_001682435.2\_ASM168243v2\_genomic.fna  
 1980 GCA\_000018065.1\_ASM1806v1\_genomic.fna  
 1981 GCA\_000195435.4\_ASM19543v4\_genomic.fna  
 1982 GCA\_000479375.2\_ASM47937v2\_genomic.fna  
 1983 GCA\_001017595.1\_ASM101759v1\_genomic.fna  
 1984 GCA\_000283675.1\_ASM28367v1\_genomic.fna  
 1985 GCA\_000761115.1\_ASM76111v1\_genomic.fna  
 1986 GCA\_000197755.2\_ASM19775v2\_genomic.fna  
 1987 GCA\_001558815.1\_ASM155881v1\_genomic.fna  
 1988 GCA\_000831165.1\_ASM83116v1\_genomic.fna  
 1989 GCA\_000270145.1\_ASM27014v1\_genomic.fna  
 1990 GCA\_000304375.1\_AINO\_genomic.fna  
 1991 GCA\_000430385.1\_ASM43038v1\_genomic.fna  
 1992 GCA\_000016805.1\_ASM1680v1\_genomic.fna  
 1993 GCA\_000292415.1\_ASM29241v1\_genomic.fna  
 1994 GCA\_000147095.1\_ASM14709v1\_genomic.fna  
 1995 GCA\_000018125.1\_ASM1812v1\_genomic.fna  
 1996 GCA\_001723625.1\_ASM172362v1\_genomic.fna  
 1997 GCA\_002243495.1\_ASM224349v1\_genomic.fna  
 1998 GCA\_001623565.1\_ASM162356v1\_genomic.fna  
 1999 GCA\_001598035.1\_ASM159803v1\_genomic.fna  
 2000 GCA\_002173595.1\_ASM217359v1\_genomic.fna  
 2001 GCA\_001687605.2\_ASM168760v2\_genomic.fna  
 2002 GCA\_900128595.1\_BCipseudotaxifoliae\_v1.0\_genomic.fna  
 2003 GCA\_002504325.1\_ASM250432v1\_genomic.fna

|                 |                |
|-----------------|----------------|
| Streptococcus   | Firmicutes     |
| Fusobacterium   | Fusobacteria   |
| Streptococcus   | Firmicutes     |
| Streptococcus   | Firmicutes     |
| Lactobacillus   | Firmicutes     |
| Pediococcus     | Firmicutes     |
| Buchnera        | Proteobacteria |
| Staphylococcus  | Firmicutes     |
| Weissella       | Firmicutes     |
| Staphylococcus  | Firmicutes     |
| Prochlorococcus | Cyanobacteria  |
| Listeria        | Firmicutes     |
| Lactococcus     | Firmicutes     |
| Mycoplasma      | Tenericutes    |
| Bacillus        | Firmicutes     |
| Lactococcus     | Firmicutes     |
| Listeria        | Firmicutes     |
| Staphylococcus  | Firmicutes     |
| Streptococcus   | Firmicutes     |
| Streptococcus   | Firmicutes     |
| Campylobacter   | Proteobacteria |
| Campylobacter   | Proteobacteria |
| Staphylococcus  | Firmicutes     |
| Bacillus        | Firmicutes     |
| Streptococcus   | Firmicutes     |
| Streptococcus   | Firmicutes     |
| Erysipelothrix  | Firmicutes     |
| Bacillus        | Firmicutes     |
| Streptococcus   | Firmicutes     |
| Streptococcus   | Firmicutes     |
| Pediococcus     | Firmicutes     |
| Planococcus     | Firmicutes     |
| Buchnera        | Proteobacteria |
| Bacillus        | Firmicutes     |

|      |                                         |                |                |
|------|-----------------------------------------|----------------|----------------|
| 2004 | GCA_001717505.1_ASM171750v1_genomic.fna | Dialister      | Firmicutes     |
| 2005 | GCA_001715535.1_ASM171553v1_genomic.fna | Spiroplasma    | Tenericutes    |
| 2006 | GCA_000238975.1_ASM23897v1_genomic.fna  | Serratia       | Proteobacteria |
| 2007 | GCA_002073355.1_ASM207335v1_genomic.fna | Streptococcus  | Firmicutes     |
| 2008 | GCA_000241125.1_ASM24112v1_genomic.fna  | Mycoplasma     | Tenericutes    |
| 2009 | GCA_000582665.1_ASM58266v1_genomic.fna  | Lactobacillus  | Firmicutes     |
| 2010 | GCA_000831125.1_ASM83112v1_genomic.fna  | Streptococcus  | Firmicutes     |
| 2011 | GCA_000832425.1_ASM83242v1_genomic.fna  | Bacillus       | Firmicutes     |
| 2012 | GCA_000294495.1_ASM29449v1_genomic.fna  | Streptococcus  | Firmicutes     |
| 2013 | GCA_000688795.1_ASM68879v1_genomic.fna  | Bacillus       | Firmicutes     |
| 2014 | GCA_000195555.1_ASM19555v1_genomic.fna  | Francisella    | Proteobacteria |
| 2015 | GCA_001629735.1_ASM162973v1_genomic.fna | Lysinibacillus | Firmicutes     |
| 2016 | GCA_001746555.1_ASM174655v1_genomic.fna | Clostridium    | Firmicutes     |
| 2017 | GCA_000498675.1_ASM49867v1_genomic.fna  | Lactobacillus  | Firmicutes     |
| 2018 | GCA_001735765.1_ASM173576v1_genomic.fna | Clostridium    | Firmicutes     |
| 2019 | GCA_002370355.1_ASM237035v1_genomic.fna | Lactobacillus  | Firmicutes     |
| 2020 | GCA_001721685.1_ASM172168v1_genomic.fna | Bacillus       | Firmicutes     |
| 2021 | GCA_900187115.1_51699_F01_genomic.fna   | Arcobacter     | Proteobacteria |
| 2022 | GCA_001719185.1_ASM171918v1_genomic.fna | Bacillus       | Firmicutes     |
| 2023 | GCA_001685375.1_ASM168537v1_genomic.fna | Streptococcus  | Firmicutes     |
| 2024 | GCA_900186955.1_49386_F02_genomic.fna   | Bacillus       | Firmicutes     |
| 2025 | GCA_001558375.1_ASM155837v1_genomic.fna | Staphylococcus | Firmicutes     |
| 2026 | GCA_000876545.1_ASM87654v1_genomic.fna  | Bacillus       | Firmicutes     |
| 2027 | GCA_001854185.1_ASM185418v1_genomic.fna | Clostridium    | Firmicutes     |
| 2028 | GCA_001708305.1_ASM170830v1_genomic.fna | Streptococcus  | Firmicutes     |
| 2029 | GCA_002000885.1_ASM200088v1_genomic.fna | Lactobacillus  | Firmicutes     |
| 2030 | GCA_000696015.1_ASM69601v1_genomic.fna  | Mycoplasma     | Tenericutes    |
| 2031 | GCA_000816385.2_ASM81638v2_genomic.fna  | Campylobacter  | Proteobacteria |
| 2032 | GCA_000767745.1_ASM76774v1_genomic.fna  | Clostridium    | Firmicutes     |
| 2033 | GCA_001011095.1_ASM101109v1_genomic.fna | Lactobacillus  | Firmicutes     |
| 2034 | GCA_001877035.1_ASM187703v1_genomic.fna | Clostridium    | Firmicutes     |
| 2035 | GCA_001870205.1_ASM187020v1_genomic.fna | Vagococcus     | Firmicutes     |
| 2036 | GCA_002009235.1_ASM200923v1_genomic.fna | Planococcus    | Firmicutes     |
| 2037 | GCA_000763495.1_ASM76349v1_genomic.fna  | Listeria       | Firmicutes     |

|      |                                         |                |                |
|------|-----------------------------------------|----------------|----------------|
| 2038 | GCA_900187245.1_51470_D02_genomic.fna   | Streptococcus  | Firmicutes     |
| 2039 | GCA_002173535.1_ASM217353v1_genomic.fna | Pediococcus    | Firmicutes     |
| 2040 | GCA_001945665.1_ASM194566v1_genomic.fna | Borrelia       | Spirochaetes   |
| 2041 | GCA_002117225.1_ASM211722v1_genomic.fna | Lactobacillus  | Firmicutes     |
| 2042 | GCA_001932615.1_ASM193261v1_genomic.fna | Weissella      | Firmicutes     |
| 2043 | GCA_000828775.1_ASM82877v1_genomic.fna  | Serratia       | Proteobacteria |
| 2044 | GCA_000211545.6_ASM21154v6_genomic.fna  | Mycoplasma     | Tenericutes    |
| 2045 | GCA_002504385.1_ASM250438v1_genomic.fna | Mesoplasma     | Tenericutes    |
| 2046 | GCA_001900245.1_ASM190024v1_genomic.fna | Mycoplasma     | Tenericutes    |
| 2047 | GCA_000583755.1_ASM58375v1_genomic.fna  | Campylobacter  | Proteobacteria |
| 2048 | GCA_900120165.1_PRJEB15652_genomic.fna  | Ezakiella      | Firmicutes     |
| 2049 | GCA_002224305.1_ASM222430v1_genomic.fna | Lactobacillus  | Firmicutes     |
| 2050 | GCA_001889165.1_ASM188916v1_genomic.fna | Bacillus       | Firmicutes     |
| 2051 | GCA_002213945.1_ASM221394v1_genomic.fna | Listeria       | Firmicutes     |
| 2052 | GCA_002000625.1_ASM200062v1_genomic.fna | Staphylococcus | Firmicutes     |
| 2053 | GCA_002407125.1_ASM240712v1_genomic.fna | Campylobacter  | Proteobacteria |
| 2054 | GCA_002238375.1_ASM223837v1_genomic.fna | Campylobacter  | Proteobacteria |
| 2055 | GCA_002000645.1_ASM200064v1_genomic.fna | Staphylococcus | Firmicutes     |
| 2056 | GCA_002213985.1_ASM221398v1_genomic.fna | Listeria       | Firmicutes     |
| 2057 | GCA_002213965.1_ASM221396v1_genomic.fna | Listeria       | Firmicutes     |
| 2058 | GCA_002000665.1_ASM200066v1_genomic.fna | Staphylococcus | Firmicutes     |
| 2059 | GCA_002214005.1_ASM221400v1_genomic.fna | Listeria       | Firmicutes     |
| 2060 | GCA_002587105.1_ASM258710v1_genomic.fna | Campylobacter  | Proteobacteria |
| 2061 | GCA_002214045.1_ASM221404v1_genomic.fna | Listeria       | Firmicutes     |
| 2062 | GCA_002000685.1_ASM200068v1_genomic.fna | Staphylococcus | Firmicutes     |
| 2063 | GCA_002587225.1_ASM258722v1_genomic.fna | Campylobacter  | Proteobacteria |
| 2064 | GCA_002214085.1_ASM221408v1_genomic.fna | Listeria       | Firmicutes     |
| 2065 | GCA_002000725.1_ASM200072v1_genomic.fna | Staphylococcus | Firmicutes     |
| 2066 | GCA_002000705.1_ASM200070v1_genomic.fna | Staphylococcus | Firmicutes     |
| 2067 | GCA_002214065.1_ASM221406v1_genomic.fna | Listeria       | Firmicutes     |
| 2068 | GCA_002000745.1_ASM200074v1_genomic.fna | Staphylococcus | Firmicutes     |
| 2069 | GCA_002000765.1_ASM200076v1_genomic.fna | Staphylococcus | Firmicutes     |
| 2070 | GCA_002214125.1_ASM221412v1_genomic.fna | Listeria       | Firmicutes     |
| 2071 | GCA_002214105.1_ASM221410v1_genomic.fna | Listeria       | Firmicutes     |

|      |                                                               |                |                |
|------|---------------------------------------------------------------|----------------|----------------|
| 2072 | GCA_002000785.1_ASM200078v1_genomic.fna                       | Staphylococcus | Firmicutes     |
| 2073 | GCA_002214145.1_ASM221414v1_genomic.fna                       | Listeria       | Firmicutes     |
| 2074 | GCA_002000805.1_ASM200080v1_genomic.fna                       | Staphylococcus | Firmicutes     |
| 2075 | GCA_002285655.1_ASM228565v1_genomic.fna                       | Listeria       | Firmicutes     |
| 2076 | GCA_002000825.1_ASM200082v1_genomic.fna                       | Staphylococcus | Firmicutes     |
| 2077 | GCA_002220325.1_ASM222032v1_genomic.fna                       | Listeria       | Firmicutes     |
| 2078 | GCA_002557735.1_ASM255773v1_genomic.fna                       | Listeria       | Firmicutes     |
| 2079 | GCA_002285835.1_ASM228583v1_genomic.fna                       | Listeria       | Firmicutes     |
| 2080 | GCA_002000845.1_ASM200084v1_genomic.fna                       | Staphylococcus | Firmicutes     |
| 2081 | GCA_000253195.1_ASM25319v1_genomic.fna                        | Clostridium    | Firmicutes     |
| 2082 | GCA_001989555.1_ASM198955v1_genomic.fna                       | Enterococcus   | Firmicutes     |
| 2083 | GCA_001586105.1_ASM158610v1_genomic.fna                       | Bacillus       | Firmicutes     |
| 2084 | GCA_000523045.1_ASM52304v1_genomic.fna                        | Bacillus       | Firmicutes     |
| 2085 | GCA_002000865.1_ASM200086v1_genomic.fna                       | Staphylococcus | Firmicutes     |
| 2086 | GCA_002025125.1_ASM202512v1_genomic.fna                       | Staphylococcus | Firmicutes     |
| 2087 | GCA_002557815.1_ASM255781v1_genomic.fna                       | Listeria       | Firmicutes     |
| 2088 | GCA_900070175.1_Lactobacillus_rhamnosus_CECT_8800_genomic.fna | Lactobacillus  | Firmicutes     |
| 2089 | GCA_001721905.1_ASM172190v1_genomic.fna                       | Enterococcus   | Firmicutes     |
| 2090 | GCA_002220575.1_ASM222057v1_genomic.fna                       | Serratia       | Proteobacteria |
| 2091 | GCA_001865495.1_ASM186549v1_genomic.fna                       | Campylobacter  | Proteobacteria |
| 2092 | GCA_001272795.1_ASM127279v1_genomic.fna                       | Mycoplasma     | Tenericutes    |
| 2093 | GCA_001484005.1_ASM148400v1_genomic.fna                       | Lactobacillus  | Firmicutes     |
| 2094 | GCA_001047695.1_ASM104769v1_genomic.fna                       | Leuconostoc    | Firmicutes     |
| 2095 | GCA_000988345.1_ASM98834v1_genomic.fna                        | Bacillus       | Firmicutes     |
| 2096 | GCA_000338115.2_ASM33811v2_genomic.fna                        | Lactobacillus  | Firmicutes     |
| 2097 | GCA_000319655.2_ASM31965v2_genomic.fna                        | Mycoplasma     | Tenericutes    |
| 2098 | GCA_000987825.1_ASM98782v1_genomic.fna                        | Bacillus       | Firmicutes     |
| 2099 | GCA_002220595.1_ASM222059v1_genomic.fna                       | Serratia       | Proteobacteria |
| 2100 | GCA_001865515.1_ASM186551v1_genomic.fna                       | Campylobacter  | Proteobacteria |
| 2101 | GCA_002073435.1_ASM207343v1_genomic.fna                       | Streptococcus  | Firmicutes     |
| 2102 | GCA_001296205.1_ASM129620v1_genomic.fna                       | Streptococcus  | Firmicutes     |
| 2103 | GCA_000025825.1_ASM2582v1_genomic.fna                         | Bacillus       | Firmicutes     |
| 2104 | GCA_000219765.1_ASM21976v1_genomic.fna                        | Streptococcus  | Firmicutes     |
| 2105 | GCA_000233755.1_ASM23375v1_genomic.fna                        | Lactobacillus  | Firmicutes     |

2106 GCA\_000833255.1\_ASM83325v1\_genomic.fna  
 2107 GCA\_001581895.1\_ASM158189v1\_genomic.fna  
 2108 GCA\_001272815.1\_ASM127281v1\_genomic.fna  
 2109 GCA\_000307125.1\_ASM30712v1\_genomic.fna  
 2110 GCA\_000307185.1\_ASM30718v1\_genomic.fna  
 2111 GCA\_000691545.1\_ASM69154v1\_genomic.fna  
 2112 GCA\_001998885.1\_ASM199888v1\_genomic.fna  
 2113 GCA\_001998805.1\_ASM199880v1\_genomic.fna  
 2114 GCA\_000221645.1\_ASM22164v1\_genomic.fna  
 2115 GCA\_001545095.1\_ASM154509v1\_genomic.fna  
 2116 GCA\_000284575.1\_ASM28457v1\_genomic.fna  
 2117 GCA\_000444405.1\_ASM44440v1\_genomic.fna  
 2118 GCA\_001989575.1\_ASM198957v1\_genomic.fna  
 2119 GCA\_000832885.1\_ASM83288v1\_genomic.fna  
 2120 GCA\_001750885.1\_ASM175088v1\_genomic.fna  
 2121 GCA\_001593765.1\_ASM159376v1\_genomic.fna  
 2122 GCA\_002163735.1\_ASM216373v1\_genomic.fna  
 2123 GCA\_000717535.1\_ASM71753v1\_genomic.fna  
 2124 GCA\_000204565.1\_ASM20456v1\_genomic.fna  
 2125 GCA\_000277185.1\_ASM27718v1\_genomic.fna  
 2126 GCA\_002021925.1\_ASM202192v1\_genomic.fna  
 2127 GCA\_900128415.1\_PRJEB15655\_genomic.fna  
 2128 GCA\_000166655.2\_ASM16665v1\_genomic.fna  
 2129 GCA\_000211255.2\_ASM21125v2\_genomic.fna  
 2130 GCA\_000699465.1\_ASM69946v1\_genomic.fna  
 2131 GCA\_002142575.1\_ASM214257v1\_genomic.fna  
 2132 GCA\_000248415.1\_ASM24841v1\_genomic.fna  
 2133 GCA\_000344765.1\_ASM34476v1\_genomic.fna  
 2134 GCA\_000189515.1\_ASM18951v1\_genomic.fna  
 2135 GCA\_000283795.1\_ASM28379v1\_genomic.fna  
 2136 GCA\_000962775.1\_ASM96277v1\_genomic.fna  
 2137 GCA\_000466785.3\_ASM46678v3\_genomic.fna  
 2138 GCA\_000143865.1\_ASM14386v1\_genomic.fna  
 2139 GCA\_001705585.1\_ASM170558v1\_genomic.fna

|                |                |
|----------------|----------------|
| Francisella    | Proteobacteria |
| Lactobacillus  | Firmicutes     |
| Mycoplasma     | Tenericutes    |
| Clostridium    | Firmicutes     |
| Streptococcus  | Firmicutes     |
| Borrelia       | Spirochaetes   |
| Vagococcus     | Firmicutes     |
| Leuconostoc    | Firmicutes     |
| Bacillus       | Firmicutes     |
| Erysipelothrix | Firmicutes     |
| Streptococcus  | Firmicutes     |
| Enterococcus   | Firmicutes     |
| Auricoccus     | Firmicutes     |
| Bacillus       | Firmicutes     |
| Enterococcus   | Firmicutes     |
| Bacillus       | Firmicutes     |
| Enterococcus   | Firmicutes     |
| Bacillus       | Firmicutes     |
| Clostridium    | Firmicutes     |
| Rickettsia     | Proteobacteria |
| Campylobacter  | Proteobacteria |
| Anaerococcus   | Firmicutes     |
| Borrelia       | Spirochaetes   |
| Enterococcus   | Firmicutes     |
| Bacillus       | Firmicutes     |
| Lactobacillus  | Firmicutes     |
| Francisella    | Proteobacteria |
| Streptococcus  | Firmicutes     |
| Lactobacillus  | Firmicutes     |
| Rickettsia     | Proteobacteria |
| Borrelia       | Spirochaetes   |
| Lactobacillus  | Firmicutes     |
| Mycoplasma     | Tenericutes    |
| Streptococcus  | Firmicutes     |





|      |                                              |                |                |
|------|----------------------------------------------|----------------|----------------|
| 2174 | GCA_002089095.1_ASM208909v1_genomic.fna      | Staphylococcus | Firmicutes     |
| 2175 | GCA_002089115.1_ASM208911v1_genomic.fna      | Staphylococcus | Firmicutes     |
| 2176 | GCA_002089075.1_ASM208907v1_genomic.fna      | Staphylococcus | Firmicutes     |
| 2177 | GCA_002097595.1_ASM209759v1_genomic.fna      | Staphylococcus | Firmicutes     |
| 2178 | GCA_002140115.1_ASM214011v1_genomic.fna      | Staphylococcus | Firmicutes     |
| 2179 | GCA_002202095.1_ASM220209v1_genomic.fna      | Staphylococcus | Firmicutes     |
| 2180 | GCA_002204555.1_ASM220455v1_genomic.fna      | Staphylococcus | Firmicutes     |
| 2181 | GCA_002202075.1_ASM220207v1_genomic.fna      | Staphylococcus | Firmicutes     |
| 2182 | GCA_002209325.1_ASM220932v1_genomic.fna      | Staphylococcus | Firmicutes     |
| 2183 | GCA_002214665.1_ASM221466v1_genomic.fna      | Staphylococcus | Firmicutes     |
| 2184 | GCA_002204575.1_ASM220457v1_genomic.fna      | Staphylococcus | Firmicutes     |
| 2185 | GCA_002310395.1_ASM231039v1_genomic.fna      | Staphylococcus | Firmicutes     |
| 2186 | GCA_002310435.1_ASM231043v1_genomic.fna      | Staphylococcus | Firmicutes     |
| 2187 | GCA_001596535.1_ASM159653v1_genomic.fna      | Bacillus       | Firmicutes     |
| 2188 | GCA_002356675.1_ASM235667v1_genomic.fna      | Staphylococcus | Firmicutes     |
| 2189 | GCA_002355355.1_ASM235535v1_genomic.fna      | Staphylococcus | Firmicutes     |
| 2190 | GCA_000209755.1_ASM20975v1_genomic.fna       | Listeria       | Firmicutes     |
| 2191 | GCA_900128735.1_BCiconfinis_v1.0_genomic.fna | Buchnera       | Proteobacteria |
| 2192 | GCA_000972725.1_ASM97272v1_genomic.fna       | Staphylococcus | Firmicutes     |
| 2193 | GCA_002386245.1_ASM238624v1_genomic.fna      | Staphylococcus | Firmicutes     |
| 2194 | GCA_002442975.1_ASM244297v1_genomic.fna      | Staphylococcus | Firmicutes     |
| 2195 | GCA_000466065.2_ASM46606v2_genomic.fna       | Campylobacter  | Proteobacteria |
| 2196 | GCA_000466075.2_ASM46607v2_genomic.fna       | Campylobacter  | Proteobacteria |
| 2197 | GCA_000807375.1_ASM80737v1_genomic.fna       | Lactococcus    | Firmicutes     |
| 2198 | GCA_000635895.2_ASM63589v2_genomic.fna       | Bacillus       | Firmicutes     |
| 2199 | GCA_000017085.1_ASM1708v1_genomic.fna        | Staphylococcus | Firmicutes     |
| 2200 | GCA_000017125.1_ASM1712v1_genomic.fna        | Staphylococcus | Firmicutes     |
| 2201 | GCA_000789315.1_ASM78931v1_genomic.fna       | Bacillus       | Firmicutes     |
| 2202 | GCA_002078375.1_ASM207837v1_genomic.fna      | Lactococcus    | Firmicutes     |
| 2203 | GCA_000210815.2_ASM21081v2_genomic.fna       | Listeria       | Firmicutes     |
| 2204 | GCA_000832465.1_ASM83246v1_genomic.fna       | Bacillus       | Firmicutes     |
| 2205 | GCA_000183185.1_ASM18318v1_genomic.fna       | Mycoplasma     | Tenericutes    |
| 2206 | GCA_000390245.1_ASM39024v1_genomic.fna       | Streptococcus  | Firmicutes     |
| 2207 | GCA_000091905.1_ASM9190v1_genomic.fna        | Streptococcus  | Firmicutes     |

|      |                                               |                 |                |
|------|-----------------------------------------------|-----------------|----------------|
| 2208 | GCA_000299135.1_ASM29913v1_genomic.fna        | Streptococcus   | Firmicutes     |
| 2209 | GCA_900128725.1_BCifornacula_v1.0_genomic.fna | Buchnera        | Proteobacteria |
| 2210 | GCA_000021445.1_ASM2144v1_genomic.fna         | Bacillus        | Firmicutes     |
| 2211 | GCA_000250905.1_ASM25090v1_genomic.fna        | Streptococcus   | Firmicutes     |
| 2212 | GCA_000196595.1_ASM19659v1_genomic.fna        | Streptococcus   | Firmicutes     |
| 2213 | GCA_001026925.1_ASM102692v1_genomic.fna       | Streptococcus   | Firmicutes     |
| 2214 | GCA_000747545.1_ASM74754v1_genomic.fna        | Bacillus        | Firmicutes     |
| 2215 | GCA_000009385.1_ASM938v1_genomic.fna          | Streptococcus   | Firmicutes     |
| 2216 | GCA_000018965.1_ASM1896v1_genomic.fna         | Streptococcus   | Firmicutes     |
| 2217 | GCA_000163915.2_ASM16391v2_genomic.fna        | Fusobacterium   | Fusobacteria   |
| 2218 | GCA_001855705.1_ASM185570v1_genomic.fna       | Streptococcus   | Firmicutes     |
| 2219 | GCA_000521565.1_ASM52156v1_genomic.fna        | Buchnera        | Proteobacteria |
| 2220 | GCA_000789355.1_ASM78935v1_genomic.fna        | Clostridium     | Firmicutes     |
| 2221 | GCA_000012465.1_ASM1246v1_genomic.fna         | Prochlorococcus | Cyanobacteria  |
| 2222 | GCA_000248435.1_ASM24843v1_genomic.fna        | Francisella     | Proteobacteria |
| 2223 | GCA_002278095.1_ASM227809v1_genomic.fna       | Lactobacillus   | Firmicutes     |
| 2224 | GCA_000013065.1_ASM1306v1_genomic.fna         | Bacillus        | Firmicutes     |
| 2225 | GCA_000022925.1_ASM2292v1_genomic.fna         | Listeria        | Firmicutes     |
| 2226 | GCA_001304735.1_ASM130473v1_genomic.fna       | Clostridium     | Firmicutes     |
| 2227 | GCA_000699525.1_ASM69952v1_genomic.fna        | Bacillus        | Firmicutes     |

---
